# Supplementary material for: microRNA-132/212 deficiency enhances Aβ production and senile plaque deposition in Alzheimer’s disease triple transgenic mice
Source: PubMed Central journal article supplement (PMC4971468; doi:10.1038/srep30953), 2016-08-03
Supplement: srep30953-s1.pdf [file srep30953-s1.pdf]

## SUPPLEMENTARY INFORMATION

### **microRNA-132/212 deficiency enhances A $\beta$ production and senile plaque deposition in Alzheimer's disease triple transgenic mice**

Julia Hernandez-Rapp, Sara Rainone, Claudia Goupil, Véronique Dorval, Pascal Y. Smith, Martine Saint-Pierre, Maxime Vallée, Emmanuel Planel, Arnaud Droit, Frédéric Calon, Francesca Cicchetti, Sébastien S. Hébert

#### **FIGURE LEGENDS**

**Supplementary Figure S1.** ELISA of endogenous (murine) A $\beta$ 40 and A $\beta$ 42 in the **(a)** cortex and **(b)** hippocampus of 18 month-old 3xTgAD<sup>WT</sup> and 3xTgAD<sup>KO</sup> mice (n= 12 per group). Data are presented as mean  $\pm$  SEM. \*P $\leq$ 0.05 (Student's t-test).

**Supplementary Figure S2.** GeneMANIA analysis of miR-132 target gene networks.

**Supplementary Figure S3.** miR-132 qRT-PCR in **(a)** Neuro2a and **(b)** HEK293 cells treated with a scrambled control or miR-132 mimics (n= 2 cultures in triplicate per group). RNU19 was used as normalization control. ELISA of human A $\beta$ , presented as A $\beta$ 42/A $\beta$ 40 ratio, in HEK293-APP<sup>Swe</sup> cells after **(c)** siRNA-Sirt1 and **(d)** EX527 treatment (n=2 cultures in triplicate per group). Data are presented as mean  $\pm$  SEM (Student's t-test). \*P $\leq$ 0.05 (Student's t-test).

**Supplementary Figure S4.** Western blot analysis of Sirt1 in HEK293-APP<sup>Swe</sup> cells after siRNA downregulation (n=2 cultures in triplicate per group). Total proteins were used as normalization control. Data are presented as mean  $\pm$  SEM. \*\*\*\*P $\leq$ 0.0001 (Student's t-test).

**Supplementary Figure S5.** Correlations of miR-132/212, insoluble A $\beta$ 42, amyloid plaque counts and Sirt1 with the age of death of patients in the ROS cohort (n=10-12 cases/group).

**Supplementary Figure S6.** Whole blot/gels used in the current study. Empty lanes are irrelevant samples.

## TABLE LEGENDS

**Supplementary Table S1.** Overview of raw and mapped RNA-Seq reads.

**Supplementary Table S2.** Misregulated transcripts in 3xTg-AD<sup>KO</sup> mice and Neuro2a<sup>132</sup> cells.

**Supplementary Table S3.** miR-132/212 targets in 3xTg-AD<sup>KO</sup> mice and Neuro2a<sup>132</sup> cells.

**Supplementary Table S4.** GO terms related to miR-132 networks in 3xTg-AD<sup>KO</sup> mice and Neuro2a<sup>132</sup> cells.

**Supplementary Table S5.** Correlations between miR-132 or miR-212 expression levels, insoluble A $\beta$ <sub>42</sub>, A $\beta$  plaque load, and Sirt1 protein levels for each group of patients in the ROS cohort (n=10-12 cases/group).

## Supplementary Figure S1

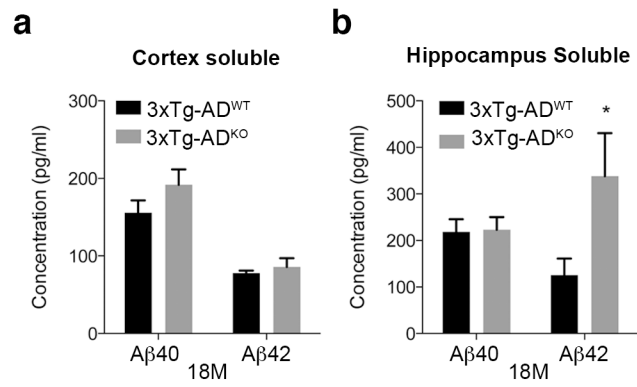

## Supplementary Figure S2

3xTg-AD

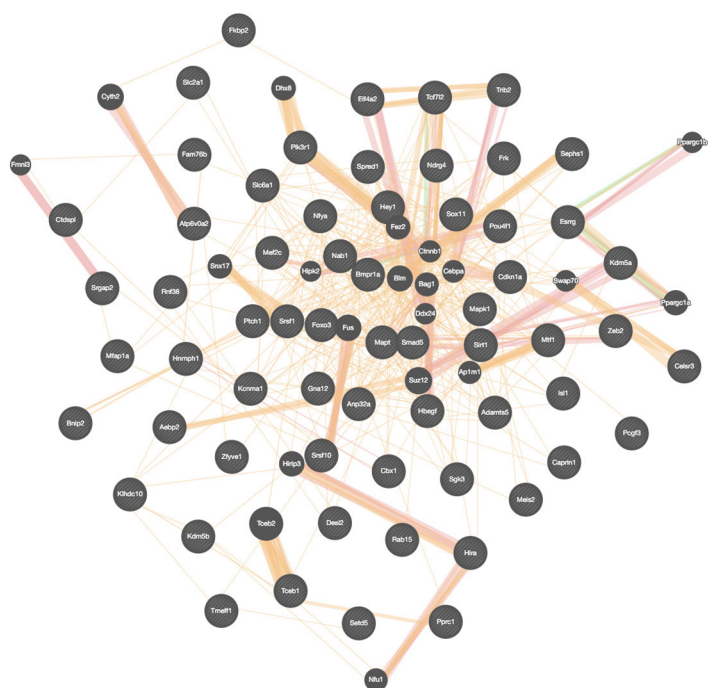

Neuro2a

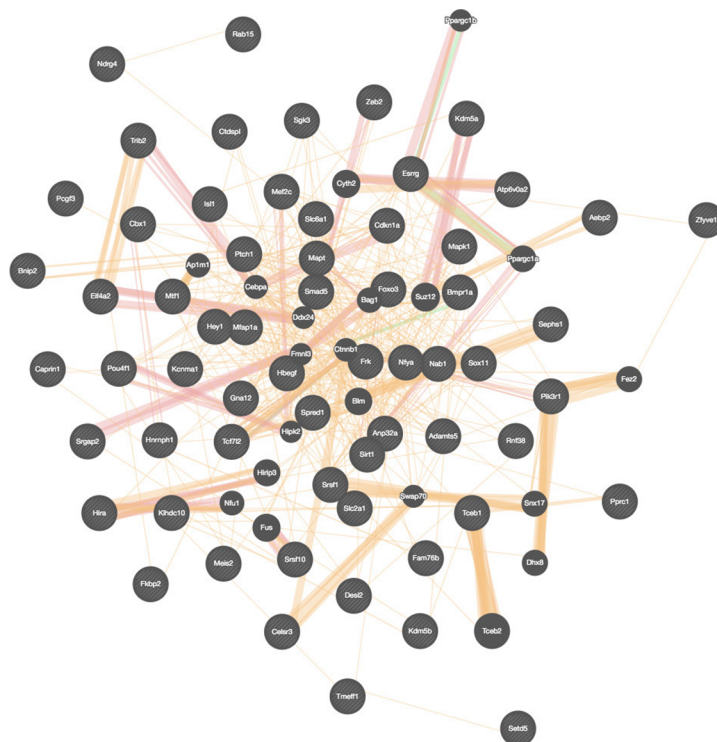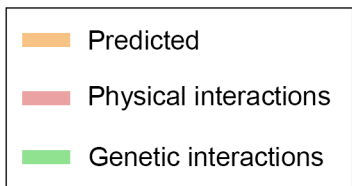

### Supplementary Figure S3

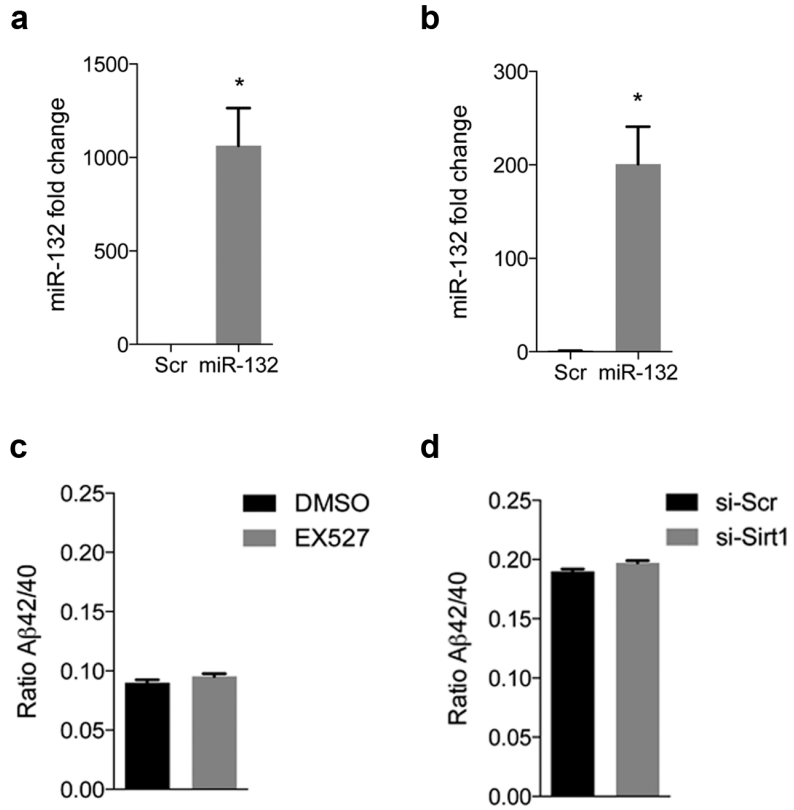

### Supplementary Figure S4

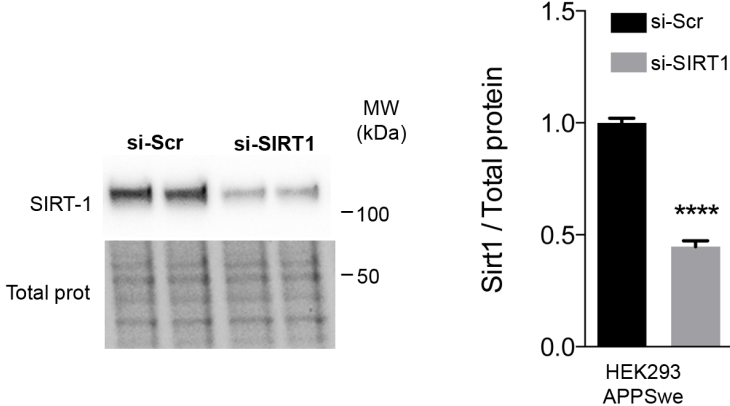

## Supplementary Figure S5

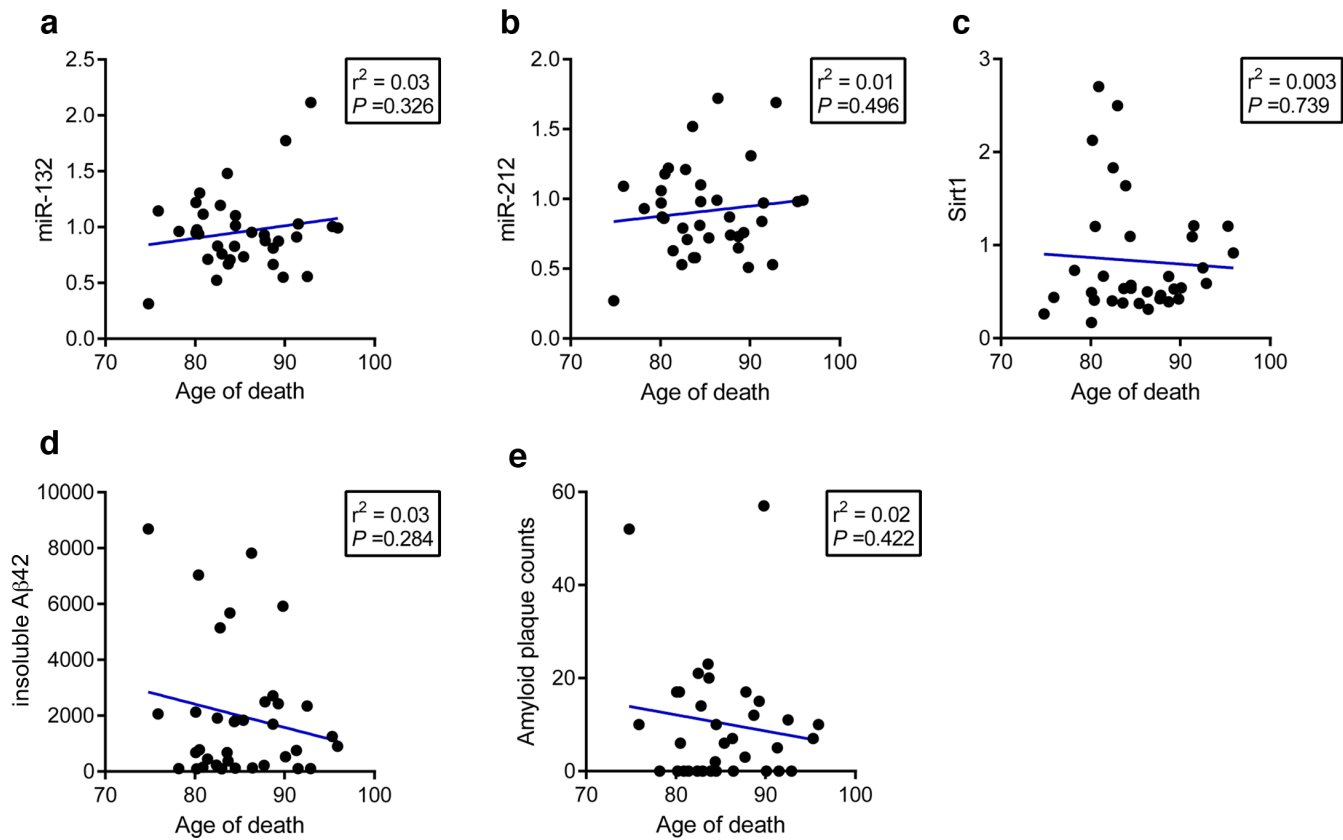

# Supplementary Figure S6

Figure 2d

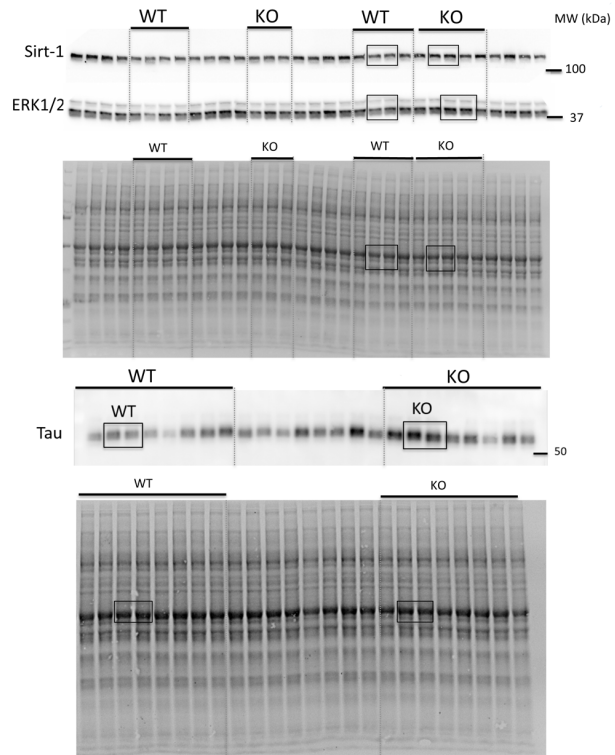

Figure 2e

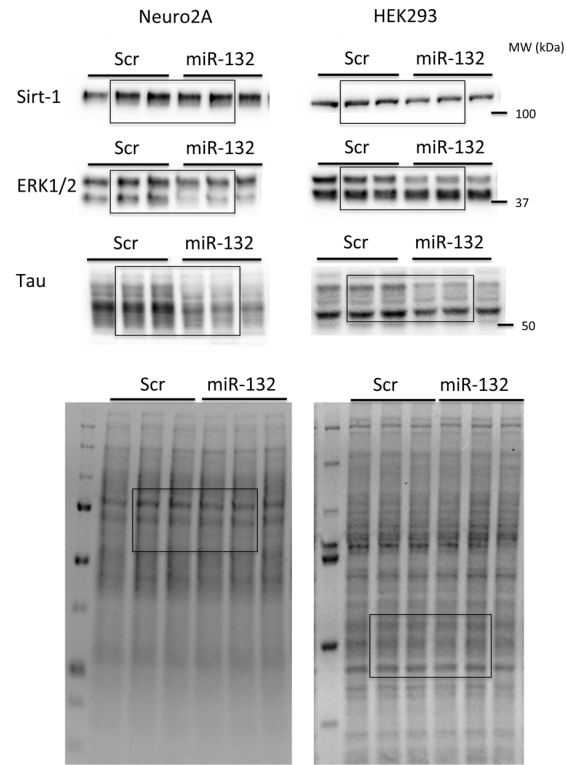

Figure 3c

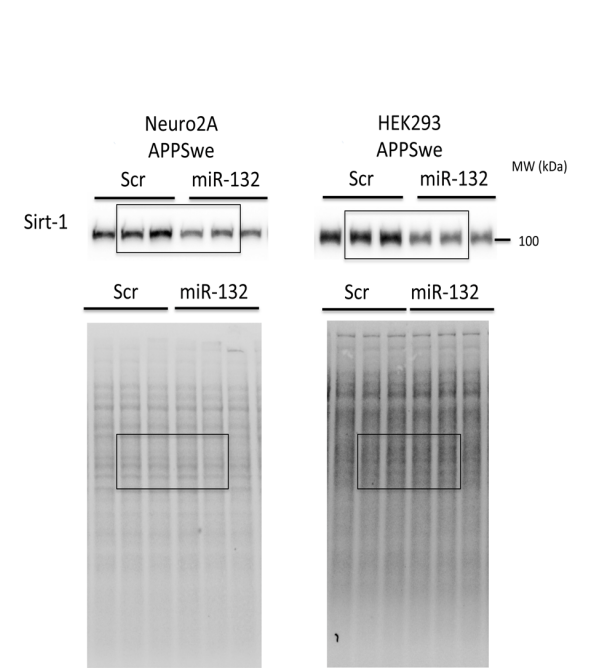

Figure 4f

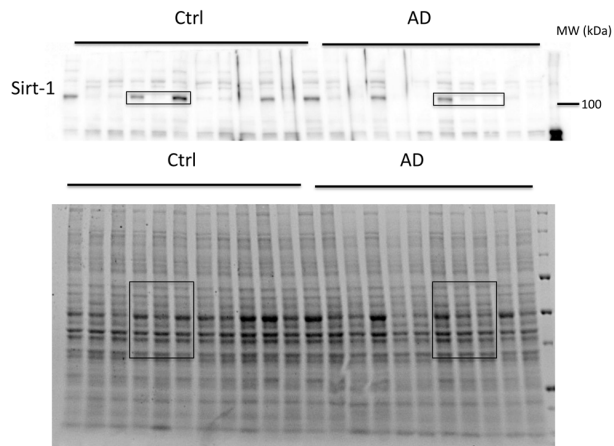

Figure S2

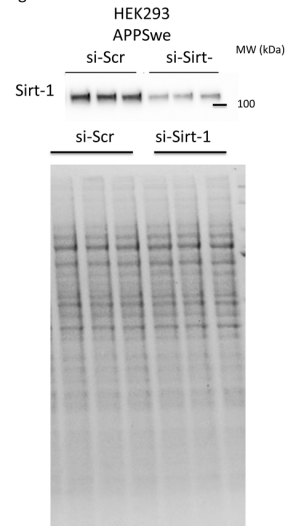



## Supplementary Table S1

| <b>Sample ID</b>   | <b>Raw reads</b> | <b>After trimming</b> | <b>Mapped</b> | <b>Multiple hits reads</b> |
|--------------------|------------------|-----------------------|---------------|----------------------------|
| 12Mo-3xTgKO-1      | 14,658,099       | 14,475,868            | 14,176,291    | 685,492                    |
| 12Mo-3xTgKO-2      | 13,522,495       | 13,355,267            | 13,105,801    | 713,386                    |
| 12Mo-3xTgKO-3      | 20,095,936       | 19,931,929            | 19,541,036    | 991,957                    |
| 12Mo-3xTgKO-4      | 10,008,104       | 9,926,244             | 9,714,450     | 503,373                    |
| 12Mo-3XTgWT-1      | 8,112,412        | 8,007,292             | 7,844,073     | 411,849                    |
| 12Mo-3XTgWT-2      | 17,824,275       | 17,597,261            | 17,224,382    | 893,425                    |
| 12Mo-3XTgWT-3      | 18,468,579       | 18,124,799            | 17,760,844    | 930,596                    |
| 12Mo-3XTgWT-4      | 22,401,758       | 21,991,588            | 21,530,896    | 1,246,739                  |
| Neuro2a-miRNA132-1 | 15,506,750       | 15,317,490            | 15,029,443    | 2,123,251                  |
| Neuro2a-miRNA132-2 | 16,846,358       | 16,638,101            | 16,316,687    | 1,730,920                  |
| Neuro2a-miRNA132-3 | 14,009,580       | 13,899,520            | 13,640,336    | 1,509,564                  |
| Neuro2a-miRNA132-4 | 14,116,956       | 14,001,776            | 13,721,093    | 1,463,188                  |
| Neuro2a-SCR-1      | 16,570,614       | 16,362,134            | 16,053,090    | 2,137,581                  |
| neuro2a-SCR-2      | 10,806,408       | 10,669,735            | 10,471,362    | 1,201,608                  |
| Neuro2a-SCR-3      | 17,261,089       | 16,948,711            | 16,525,803    | 1,916,186                  |
| Neuro2a-SCR-4      | 30,899,105       | 30,334,254            | 29,785,095    | 3,315,080                  |

## Supplementary Table S2

### RNA-Seq expression analysis of 3xTg-AD mice

| Gene Symbol   | Transcript        | p-value    | Ratio (KO vs. WT) | Fold Change |
|---------------|-------------------|------------|-------------------|-------------|
| 0610005C13Rik | 0610005C13Rik-009 | 0.0341598  | 5.51546e-06       | -181309     |
| 0610005C13Rik | 0610005C13Rik-005 | 0.0335434  | 3.20175e+08       | 3.20175e+08 |
| 0610038B21Rik | 0610038B21Rik-001 | 0.0393228  | 2.71101           | 2.71101     |
| 1110002E22Rik | 1110002E22Rik-001 | 0.0103241  | 0.677821          | -1.47532    |
| 1110004E09Rik | 1110004E09Rik-003 | 0.0161545  | 0.00639356        | -156.407    |
| 1110004F10Rik | 1110004F10Rik-006 | 0.0212205  | 0.46833           | -2.13525    |
| 1110006O24Rik | 1110006O24Rik-001 | 0.0461868  | 0.515567          | -1.93961    |
| 1110059E24Rik | 1110059E24Rik-007 | 0.0404261  | 2.06527e+08       | 2.06527e+08 |
| 1300017J02Rik | 1300017J02Rik-001 | 0.0336934  | 22445.1           | 22445.1     |
| 1500012F01Rik | 1500012F01Rik-004 | 0.0190517  | 0.671701          | -1.48876    |
| 1500015O10Rik | 1500015O10Rik-001 | 0.0453942  | 12.4266           | 12.4266     |
| 1500026H17Rik | 1500026H17Rik-201 | 0.0128515  | 0.621867          | -1.60806    |
| 1600029O15Rik | 1600029O15Rik-001 | 0.00759147 | 5.38875           | 5.38875     |
| 1700001L05Rik | 1700001L05Rik-004 | 0.0110301  | 180.945           | 180.945     |
| 1700001O22Rik | 1700001O22Rik-006 | 0.0486048  | 0.0697255         | -14.342     |
| 1700001O22Rik | 1700001O22Rik-011 | 0.0280517  | 1984.58           | 1984.58     |
| 1700007F19Rik | 1700007F19Rik-001 | 0.0105239  | 3.12346           | 3.12346     |
| 1700012B09Rik | 1700012B09Rik-004 | 0.0376975  | 6157.05           | 6157.05     |
| 1700019D03Rik | 1700019D03Rik-003 | 0.012562   | 0.287834          | -3.47422    |
| 1700019D03Rik | 1700019D03Rik-001 | 0.0101993  | 0.241878          | -4.13431    |
| 1700019D03Rik | 1700019D03Rik-002 | 0.0278685  | 1.46714           | 1.46714     |
| 1700019N19Rik | 1700019N19Rik-001 | 0.0399664  | 3.47762           | 3.47762     |
| 1700021L23Rik | 1700021L23Rik-001 | 0.0103687  | 0.134787          | -7.41912    |
| 1700021N21Rik | 1700021N21Rik-001 | 0.0257154  | 0.34938           | -2.86221    |
| 1700023F06Rik | 1700023F06Rik-005 | 0.0345539  | 2.18809e+07       | 2.18809e+07 |
| 1700028K03Rik | 1700028K03Rik-003 | 0.0174366  | 0.0299594         | -33.3785    |
| 1700028P14Rik | 1700028P14Rik-201 | 0.0447788  | 3.03534           | 3.03534     |
| 1700030J22Rik | 1700030J22Rik-201 | 0.0473772  | 1.19801           | 1.19801     |
| 1700030L20Rik | 1700030L20Rik-001 | 0.00511771 | 0.0585682         | -17.0741    |
| 1700037C18Rik | 1700037C18Rik-005 | 0.0123617  | 1.64591           | 1.64591     |
| 1700037H04Rik | 1700037H04Rik-003 | 0.037755   | 6.69801           | 6.69801     |
| 1700049G17Rik | 1700049G17Rik-004 | 0.0418774  | 0.193183          | -5.17645    |
| 1700101E01Rik | 1700101E01Rik-002 | 0.0307251  | 0.000127876       | -7820.07    |
| 1700104B16Rik | 1700104B16Rik-002 | 0.0365932  | 1.64064e-05       | -60951.7    |
| 1700109K24Rik | 1700109K24Rik-201 | 0.00244522 | 0.603026          | -1.6583     |
| 1700120B22Rik | 1700120B22Rik-001 | 0.0366881  | 0.276952          | -3.61073    |
| 1810041L15Rik | 1810041L15Rik-002 | 0.00745192 | 0.190051          | -5.26175    |
| 1810062O18Rik | 1810062O18Rik-005 | 0.0219612  | 11.8233           | 11.8233     |

|               |                   |             |             |             |
|---------------|-------------------|-------------|-------------|-------------|
| 2010013B24Rik | 2010013B24Rik-001 | 0.0182019   | 0.10034     | -9.96608    |
| 2010204K13Rik | 2010204K13Rik-002 | 0.0288904   | 0.726506    | -1.37645    |
| 2210013O21Rik | 2210013O21Rik-004 | 0.021503    | 0.503432    | -1.98636    |
| 2210018M11Rik | 2210018M11Rik-011 | 0.0402965   | 1.75588     | 1.75588     |
| 2210018M11Rik | 2210018M11Rik-002 | 0.0386256   | 1.32625     | 1.32625     |
| 2210408F21Rik | 2210408F21Rik-015 | 0.0340316   | 0.317405    | -3.15055    |
| 2310001H17Rik | 2310001H17Rik-006 | 0.000276608 | 4.06577e+06 | 4.06577e+06 |
| 2310002F09Rik | 2310002F09Rik-001 | 0.0273644   | 0.564257    | -1.77224    |
| 2310067B10Rik | 2310067B10Rik-002 | 0.0167337   | 1.39372     | 1.39372     |
| 2310075C17Rik | 2310075C17Rik-001 | 0.0482878   | 5.48954     | 5.48954     |
| 2410022M11Rik | 2410022M11Rik-001 | 0.0327027   | 0.718414    | -1.39195    |
| 2410131K14Rik | 2410131K14Rik-001 | 0.0181157   | 1.2221      | 1.2221      |
| 2610001J05Rik | 2610001J05Rik-002 | 0.0479107   | 0.785482    | -1.2731     |
| 2610001J05Rik | 2610001J05Rik-001 | 0.0303785   | 1.32206     | 1.32206     |
| 2610020H08Rik | 2610020H08Rik-002 | 0.0494125   | 4.55139     | 4.55139     |
| 2610020H08Rik | 2610020H08Rik-201 | 0.0494125   | 4.55139     | 4.55139     |
| 2610203C20Rik | 2610203C20Rik-013 | 0.0197014   | 0.0119376   | -83.7692    |
| 2610507I01Rik | 2610507I01Rik-001 | 0.0330261   | 0.771579    | -1.29604    |
| 2610524H06Rik | 2610524H06Rik-001 | 0.0365532   | 0.787519    | -1.26981    |
| 2610528A11Rik | 2610528A11Rik-002 | 0.0371238   | 2.4517      | 2.4517      |
| 2810001G20Rik | 2810001G20Rik-002 | 0.0168932   | 0.126085    | -7.93118    |
| 2810025M15Rik | 2810025M15Rik-001 | 0.0117598   | 2.47868     | 2.47868     |
| 2810408A11Rik | 2810408A11Rik-006 | 0.0321868   | 3.68734e+07 | 3.68734e+07 |
| 2810428I15Rik | 2810428I15Rik-006 | 0.0454807   | 5.28716     | 5.28716     |
| 2900041M22Rik | 2900041M22Rik-001 | 0.00333705  | 0.383413    | -2.60815    |
| 3110052M02Rik | 3110052M02Rik-201 | 0.0256309   | 0.738145    | -1.35475    |
| 3632451O06Rik | 3632451O06Rik-001 | 0.039289    | 0.821624    | -1.2171     |
| 4632428C04Rik | 4632428C04Rik-201 | 0.0221921   | 1.81567     | 1.81567     |
| 4632428N05Rik | 4632428N05Rik-003 | 0.0446542   | 1.77538     | 1.77538     |
| 4833423E24Rik | 4833423E24Rik-001 | 0.016013    | 0.39026     | -2.5624     |
| 4921514A10Rik | 4921514A10Rik-001 | 0.00104517  | 2.3211      | 2.3211      |
| 4930402H24Rik | 4930402H24Rik-002 | 0.0275765   | 8.67921     | 8.67921     |
| 4930427A07Rik | 4930427A07Rik-001 | 0.0373109   | 6.96624     | 6.96624     |
| 4930448E22Rik | 4930448E22Rik-201 | 0.0280782   | 13.7815     | 13.7815     |
| 4930467D21Rik | 4930467D21Rik-002 | 0.0339172   | 0.288953    | -3.46077    |
| 4930477O15Rik | 4930477O15Rik-001 | 0.0142573   | 3.04015     | 3.04015     |
| 4930480K23Rik | 4930480K23Rik-201 | 0.0413887   | 0.709016    | -1.41041    |
| 4930502E18Rik | 4930502E18Rik-001 | 0.00707674  | 0.116213    | -8.60488    |
| 4930523C07Rik | 4930523C07Rik-003 | 0.0484115   | 0.000104661 | -9554.65    |
| 4930544I03Rik | 4930544I03Rik-201 | 0.0494802   | 8.36046     | 8.36046     |
| 4931406P16Rik | 4931406P16Rik-008 | 0.0439143   | 41.6223     | 41.6223     |
| 4932418E24Rik | 4932418E24Rik-002 | 0.0355704   | 5.46742     | 5.46742     |
| 4933413J09Rik | 4933413J09Rik-004 | 0.0321115   | 2.22826     | 2.22826     |

|                |                    |            |             |              |
|----------------|--------------------|------------|-------------|--------------|
| 4933415A04Rik  | 4933415A04Rik-201  | 0.0304863  | 2.02975     | 2.02975      |
| 4933431E20Rik  | 4933431E20Rik-013  | 0.0483268  | 0.0727086   | -13.7535     |
| 4933439C10Rik  | 4933439C10Rik-003  | 0.0390863  | 2.76807     | 2.76807      |
| 5031434O11Rik  | 5031434O11Rik-001  | 0.00793112 | 0.869125    | -1.15058     |
| 5330434G04Rik  | 5330434G04Rik-002  | 0.0309033  | 0.782137    | -1.27855     |
| 5730409E04Rik  | 5730409E04Rik-001  | 0.00830099 | 0.692243    | -1.44458     |
| 5830415F09Rik  | 5830415F09Rik-002  | 0.0362168  | 0.000116327 | -8596.44     |
| 6330418K02Rik  | 6330418K02Rik-004  | 0.0415893  | 227.208     | 227.208      |
| 6330549D23Rik  | 6330549D23Rik-002  | 0.0371848  | 1.49846e-05 | -66735.4     |
| 6430511E19Rik  | 6430511E19Rik-001  | 0.0247296  | 0.786297    | -1.27178     |
| 8030423F21Rik  | 8030423F21Rik-001  | 0.00633818 | 0.375599    | -2.66241     |
| 9030624J02Rik  | 9030624J02Rik-005  | 0.0204737  | 0.137454    | -7.27515     |
| 9130019P16Rik  | 9130019P16Rik-001  | 0.0294761  | 1.7961      | 1.7961       |
| 9330182L06Rik  | 9330182L06Rik-003  | 0.0384434  | 2.60262     | 2.60262      |
| 9430016H08Rik  | 9430016H08Rik-001  | 0.0347718  | 0.905761    | -1.10404     |
| 9430091E24Rik  | 9430091E24Rik-001  | 0.0348101  | 1.78241     | 1.78241      |
| 9530026P05Rik  | 9530026P05Rik-004  | 0.0229603  | 0.000480771 | -2079.99     |
| 9530068E07Rik  | 9530068E07Rik-003  | 0.0260034  | 2.42878e-09 | -4.11729e+08 |
| 9530068E07Rik  | 9530068E07Rik-001  | 0.0487867  | 1.10002     | 1.10002      |
| 9530068E07Rik  | 9530068E07Rik-201  | 0.0491204  | 1.0999      | 1.0999       |
| 9630041A04Rik  | 9630041A04Rik-001  | 0.00513035 | 3.08559     | 3.08559      |
| 9930014A18Rik  | 9930014A18Rik-004  | 0.0379277  | 35178.9     | 35178.9      |
| 9930111J21Rik1 | 9930111J21Rik1-002 | 0.047877   | 5.90711     | 5.90711      |
| A130006I12Rik  | A130006I12Rik-201  | 0.0302163  | 1.83498     | 1.83498      |
| A230065N10Rik  | A230065N10Rik-201  | 0.0282423  | 1.87737     | 1.87737      |
| A330094K24Rik  | A330094K24Rik-201  | 0.0182556  | 3.33133     | 3.33133      |
| A430005L14Rik  | A430005L14Rik-003  | 0.00189089 | 0.112617    | -8.87963     |
| A530016L24Rik  | A530016L24Rik-201  | 0.0253442  | 0.514062    | -1.94529     |
| A530058N18Rik  | A530058N18Rik-007  | 0.0270457  | 5.96244e+09 | 5.96244e+09  |
| A730015C16Rik  | A730015C16Rik-201  | 0.0373852  | 4.87038     | 4.87038      |
| A730017C20Rik  | A730017C20Rik-004  | 0.0186016  | 6.87473     | 6.87473      |
| A730020E08Rik  | A730020E08Rik-002  | 0.0302653  | 0.759069    | -1.3174      |
| A730061H03Rik  | A730061H03Rik-201  | 0.0345336  | 0.307483    | -3.25222     |
| A730089K16Rik  | A730089K16Rik-001  | 0.0208586  | 0.390473    | -2.56099     |
| A830008E24Rik  | A830008E24Rik-002  | 0.0493743  | 11.0407     | 11.0407      |
| A830010M20Rik  | A830010M20Rik-003  | 0.0350874  | 0.0385225   | -25.9589     |
| A830018L16Rik  | A830018L16Rik-003  | 0.0498595  | 0.904561    | -1.10551     |
| A830018L16Rik  | A830018L16Rik-007  | 0.0140302  | 0.491722    | -2.03367     |
| A830018L16Rik  | A830018L16Rik-004  | 0.0480506  | 7.37221e-11 | -1.35644e+10 |
| A830019P07Rik  | A830019P07Rik-001  | 0.041588   | 0.668708    | -1.49542     |
| A830036E02Rik  | A830036E02Rik-001  | 0.00176556 | 2.075       | 2.075        |
| A830036E02Rik  | A830036E02Rik-002  | 0.0101659  | 1.97506     | 1.97506      |
| A830082K12Rik  | A830082K12Rik-007  | 0.0495417  | 0.7589      | -1.3177      |

|               |                   |             |             |              |
|---------------|-------------------|-------------|-------------|--------------|
| A930004D18Rik | A930004D18Rik-002 | 0.000828422 | 0.13324     | -7.50527     |
| A930033H14Rik | A930033H14Rik-001 | 0.0438727   | 0.82642     | -1.21004     |
| AA465934      | AA465934-002      | 7.97177e-11 | 0.0152526   | -65.5627     |
| AA465934      | AA465934-005      | 4.16596e-05 | 0.389118    | -2.56991     |
| AA465934      | AA465934-003      | 0.00247462  | 12.4649     | 12.4649      |
| AA467197      | AA467197-001      | 0.0341402   | 6.27326e-07 | -1.59407e+06 |
| Aamdc         | Aamdc-004         | 0.0481876   | 0.129013    | -7.75117     |
| Aamdc         | Aamdc-013         | 0.0413897   | 0.612629    | -1.63231     |
| Aars          | Aars-003          | 0.024039    | 0.26791     | -3.7326      |
| Aarsd1        | Aarsd1-009        | 0.00548557  | 0.241682    | -4.13767     |
| Aass          | Aass-001          | 0.0469601   | 1.31026     | 1.31026      |
| Aatk          | Aatk-009          | 0.00195042  | 1.46064e-07 | -6.84633e+06 |
| Abca3         | Abca3-201         | 0.0167236   | 0.821812    | -1.21682     |
| Abca5         | Abca5-004         | 0.0381058   | 1.00529e+09 | 1.00529e+09  |
| Abcb4         | Abcb4-002         | 0.0309406   | 0.198209    | -5.04519     |
| Abcb9         | Abcb9-001         | 0.0220301   | 1.21652     | 1.21652      |
| Abcc3         | Abcc3-001         | 0.0316451   | 0.593263    | -1.68559     |
| Abcc5         | Abcc5-002         | 0.0226062   | 0.34595     | -2.89059     |
| Abcf1         | Abcf1-001         | 0.0369512   | 1.0906      | 1.0906       |
| Abcf3         | Abcf3-001         | 0.0302241   | 1.09208     | 1.09208      |
| Abhd11os      | Abhd11os-001      | 0.0498734   | 5.45486     | 5.45486      |
| Abhd12        | Abhd12-002        | 0.00833497  | 0.752956    | -1.3281      |
| Abhd14a       | Abhd14a-006       | 0.0386227   | 0.293407    | -3.40824     |
| Abhd14b       | Abhd14b-006       | 0.0220642   | 7.30832e-06 | -136830      |
| Abhd16a       | Abhd16a-006       | 0.00350139  | 2.20636     | 2.20636      |
| Abi1          | Abi1-007          | 0.00557798  | 0.629019    | -1.58978     |
| Abi3bp        | Abi3bp-201        | 0.0341766   | 6.32526     | 6.32526      |
| Ablim1        | Ablim1-006        | 0.0228343   | 0.239166    | -4.1812      |
| Abr           | Abr-010           | 0.000557524 | 0.611484    | -1.63537     |
| Abr           | Abr-201           | 0.00212027  | 0.8773      | -1.13986     |
| Abr           | Abr-001           | 0.00339719  | 0.758038    | -1.3192      |
| AC154247.1    | AC154247.1-201    | 0.027146    | 481.986     | 481.986      |
| AC156028.1    | AC156028.1-201    | 0.011353    | 3.48529     | 3.48529      |
| Acaa1b        | Acaa1b-001        | 0.0398333   | 0.286618    | -3.48896     |
| Acaa2         | Acaa2-201         | 0.0296863   | 1.52209     | 1.52209      |
| Acacb         | Acacb-201         | 0.0219058   | 1.78553     | 1.78553      |
| Acad11        | Acad11-004        | 0.0355756   | 12.3366     | 12.3366      |
| Acadsb        | Acadsb-001        | 0.0378781   | 1.11834     | 1.11834      |
| Acat3         | Acat3-001         | 0.0157875   | 0.693006    | -1.44299     |
| Acbd4         | Acbd4-201         | 0.0234978   | 0.435674    | -2.29529     |
| Accs          | Accs-003          | 0.0358354   | 0.109838    | -9.10435     |
| Acer3         | Acer3-001         | 0.0403951   | 0.87351     | -1.14481     |
| Acer3         | Acer3-002         | 0.0388639   | 0.538272    | -1.8578      |

|          |              |            |             |          |
|----------|--------------|------------|-------------|----------|
| Acin1    | Acin1-008    | 0.0472637  | 1.78219     | 1.78219  |
| Acly     | Acly-001     | 0.0173986  | 1.25744     | 1.25744  |
| Acot10   | Acot10-201   | 0.0192098  | 9.70644     | 9.70644  |
| Acot6    | Acot6-001    | 0.0036528  | 0.814773    | -1.22734 |
| Acot8    | Acot8-003    | 0.00110093 | 1.79869     | 1.79869  |
| Acot9    | Acot9-004    | 0.0254925  | 9.08173     | 9.08173  |
| Acox1    | Acox1-006    | 0.0238178  | 0.111012    | -9.00804 |
| Acp6     | Acp6-004     | 0.0246501  | 128.9       | 128.9    |
| Acrbp    | Acrbp-005    | 0.0425719  | 3.30846     | 3.30846  |
| Acsl6    | Acsl6-011    | 0.041014   | 2.48554     | 2.48554  |
| Acss3    | Acss3-201    | 0.0208711  | 2.26059     | 2.26059  |
| Acvr1    | Acvr1-201    | 0.00823161 | 0.63281     | -1.58025 |
| Acvr1b   | Acvr1b-001   | 0.00579639 | 1.06595     | 1.06595  |
| Adam11   | Adam11-002   | 0.00702503 | 0.622109    | -1.60744 |
| Adam11   | Adam11-001   | 0.0325438  | 0.88068     | -1.13549 |
| Adam11   | Adam11-003   | 0.0255085  | 3.92398     | 3.92398  |
| Adam15   | Adam15-002   | 0.0448074  | 0.641418    | -1.55905 |
| Adam1a   | Adam1a-001   | 0.0136425  | 1.29099     | 1.29099  |
| Adam22   | Adam22-001   | 0.0371486  | 0.088209    | -11.3367 |
| Adam22   | Adam22-003   | 0.042545   | 0.787815    | -1.26933 |
| Adam32   | Adam32-006   | 0.00993811 | 0.139239    | -7.18188 |
| Adamts10 | Adamts10-002 | 0.00443992 | 0.351004    | -2.84897 |
| Adamts5  | Adamts5-201  | 0.0058868  | 1.8308      | 1.8308   |
| Adamts7  | Adamts7-005  | 0.0177226  | 9.99489     | 9.99489  |
| Adamtsl5 | Adamtsl5-007 | 0.0318655  | 8.10437     | 8.10437  |
| Adamtsl5 | Adamtsl5-005 | 0.0170894  | 9.21674     | 9.21674  |
| Adarb1   | Adarb1-011   | 0.0297224  | 2.63215e-05 | -37991.8 |
| Adarb2   | Adarb2-001   | 0.0217472  | 0.835236    | -1.19727 |
| Adcy10   | Adcy10-004   | 0.0111635  | 9.60713     | 9.60713  |
| Adcy9    | Adcy9-001    | 0.0340056  | 0.863113    | -1.1586  |
| Add2     | Add2-004     | 0.00937376 | 1.32093     | 1.32093  |
| Adgra3   | Adgra3-003   | 0.0264755  | 1095.34     | 1095.34  |
| Adgrb1   | Adgrb1-001   | 0.0301387  | 1.38529     | 1.38529  |
| Adgrg5   | Adgrg5-001   | 0.0321465  | 7.90575     | 7.90575  |
| Adgrg5   | Adgrg5-201   | 0.0321465  | 7.90575     | 7.90575  |
| Adgrl1   | Adgrl1-009   | 0.0152024  | 0.436019    | -2.29348 |
| Adgrl2   | Adgrl2-017   | 0.0309662  | 0.0030895   | -323.677 |
| Adgrl3   | Adgrl3-014   | 0.033775   | 2.09023     | 2.09023  |
| Adi1     | Adi1-002     | 0.0120029  | 0.515517    | -1.9398  |
| Adi1     | Adi1-001     | 0.00275524 | 1.1838      | 1.1838   |
| Adipor1  | Adipor1-002  | 0.00590016 | 1.52928     | 1.52928  |
| Adipor2  | Adipor2-001  | 0.00193825 | 1.37325     | 1.37325  |
| Adrb3    | Adrb3-001    | 0.0115791  | 0.19408     | -5.1525  |

|          |              |             |             |              |
|----------|--------------|-------------|-------------|--------------|
| Aebp2    | Aebp2-002    | 0.0492824   | 1.13445     | 1.13445      |
| Aff3     | Aff3-002     | 0.0111661   | 0.845905    | -1.18217     |
| Aff4     | Aff4-003     | 0.0235733   | 0.200893    | -4.97776     |
| Aff4     | Aff4-006     | 0.0436744   | 0.0459494   | -21.7631     |
| Afg3l1   | Afg3l1-005   | 0.0397667   | 420.224     | 420.224      |
| Agbl2    | Agbl2-004    | 0.0314201   | 0.000622212 | -1607.17     |
| Agbl2    | Agbl2-201    | 0.0484116   | 3.25968     | 3.25968      |
| Agbl2    | Agbl2-202    | 0.0368045   | 6.22792     | 6.22792      |
| Agbl3    | Agbl3-006    | 0.0023497   | 0.330816    | -3.02283     |
| Agbl3    | Agbl3-002    | 0.0190911   | 0.659227    | -1.51693     |
| Agbl3    | Agbl3-009    | 0.0025208   | 4.23824     | 4.23824      |
| Aggf1    | Aggf1-002    | 0.0100779   | 0.197255    | -5.06957     |
| Ago4     | Ago4-001     | 0.0371251   | 1.17344     | 1.17344      |
| Agpat1   | Agpat1-006   | 0.00291535  | 11.0345     | 11.0345      |
| Agpat1   | Agpat1-008   | 0.0204788   | 1.52265     | 1.52265      |
| Agpat4   | Agpat4-006   | 0.000689748 | 0.188487    | -5.3054      |
| Agpat9   | Agpat9-002   | 0.0212969   | 1.55732     | 1.55732      |
| Agtrap   | Agtrap-001   | 0.0106338   | 1.2461      | 1.2461       |
| Ahctf1   | Ahctf1-007   | 0.0254079   | 1.98167     | 1.98167      |
| Ahcyl2   | Ahcyl2-018   | 0.0154198   | 0.455143    | -2.19711     |
| Ahrr     | Ahrr-002     | 0.0294306   | 19712.7     | 19712.7      |
| AI118078 | AI118078-002 | 0.0435975   | 2.42332     | 2.42332      |
| AI413582 | AI413582-001 | 0.00834294  | 1.40075     | 1.40075      |
| Aif1     | Aif1-004     | 0.00763838  | 184.513     | 184.513      |
| Aif1l    | Aif1l-007    | 0.0345697   | 1.90293e-11 | -5.25505e+10 |
| Aifm1    | Aifm1-004    | 0.00195603  | 4.63713     | 4.63713      |
| Aig1     | Aig1-003     | 0.0127532   | 8.22011     | 8.22011      |
| Aimp2    | Aimp2-001    | 0.0226873   | 0.713252    | -1.40203     |
| Aip      | Aip-001      | 0.00944953  | 0.607808    | -1.64526     |
| Aip      | Aip-003      | 0.0285242   | 0.465476    | -2.14834     |
| Aip      | Aip-002      | 6.6708e-05  | 1.19179     | 1.19179      |
| Ak2      | Ak2-003      | 0.0312899   | 469528      | 469528       |
| Akap1    | Akap1-002    | 0.029004    | 1.25634     | 1.25634      |
| Akap11   | Akap11-201   | 0.0260517   | 0.904583    | -1.10548     |
| Akap6    | Akap6-201    | 0.0259984   | 0.917934    | -1.0894      |
| Akr1b8   | Akr1b8-002   | 0.00985598  | 171579      | 171579       |
| Akt1s1   | Akt1s1-003   | 0.0247747   | 0.487798    | -2.05003     |
| Akt2     | Akt2-002     | 0.0493463   | 0.571666    | -1.74927     |
| Akt2     | Akt2-001     | 0.0350608   | 1.29071     | 1.29071      |
| Akt3     | Akt3-201     | 0.0156223   | 0.793015    | -1.26101     |
| Alad     | Alad-002     | 0.00419574  | 0.344203    | -2.90527     |
| Alad     | Alad-001     | 0.00608514  | 1.13128     | 1.13128      |
| Aldh1l1  | Aldh1l1-004  | 0.0124605   | 0.127388    | -7.85005     |

|          |              |             |             |             |
|----------|--------------|-------------|-------------|-------------|
| Aldh1l1  | Aldh1l1-001  | 0.0320766   | 1.82977     | 1.82977     |
| Aldh1l2  | Aldh1l2-004  | 0.0257467   | 4.19389     | 4.19389     |
| Aldh4a1  | Aldh4a1-001  | 0.038498    | 1.17755     | 1.17755     |
| Aldh7a1  | Aldh7a1-008  | 0.0220226   | 0.657399    | -1.52115    |
| Aldh7a1  | Aldh7a1-002  | 0.0212849   | 1.23509     | 1.23509     |
| Alg1     | Alg1-001     | 0.00124685  | 3.8239      | 3.8239      |
| Alg12    | Alg12-001    | 0.0435341   | 0.645884    | -1.54827    |
| Alg2     | Alg2-001     | 0.0131887   | 0.884476    | -1.13061    |
| Alg5     | Alg5-001     | 0.0234072   | 0.925205    | -1.08084    |
| Alms1    | Alms1-001    | 0.0159771   | 1.20352     | 1.20352     |
| Aloxe3   | Aloxe3-002   | 0.0192306   | 4.79397     | 4.79397     |
| Alpk1    | Alpk1-001    | 0.00225817  | 2.73691     | 2.73691     |
| Alyref   | Alyref-003   | 0.0052404   | 1.8124      | 1.8124      |
| Ambra1   | Ambra1-006   | 0.0467409   | 0.0133386   | -74.9704    |
| Amdhd2   | Amdhd2-003   | 0.0299236   | 0.708938    | -1.41056    |
| Ammecr1  | Ammecr1-001  | 0.00936088  | 1.29664     | 1.29664     |
| Amn1     | Amn1-002     | 0.000606554 | 1.81859     | 1.81859     |
| Amotl1   | Amotl1-001   | 0.00778478  | 1.30988     | 1.30988     |
| Amotl1   | Amotl1-201   | 0.00778535  | 1.30987     | 1.30987     |
| Amotl1   | Amotl1-004   | 0.0346301   | 6.55598     | 6.55598     |
| Amph     | Amph-002     | 0.0147254   | 0.852609    | -1.17287    |
| Anapc1   | Anapc1-008   | 0.049015    | 6.42683e-05 | -15559.8    |
| Anapc10  | Anapc10-201  | 0.0292787   | 0.846887    | -1.1808     |
| Anapc13  | Anapc13-005  | 0.0486909   | 1.78029     | 1.78029     |
| Anapc15  | Anapc15-011  | 0.0139876   | 0.46191     | -2.16492    |
| Anapc2   | Anapc2-001   | 0.040123    | 1.06524     | 1.06524     |
| Angel1   | Angel1-005   | 0.0341145   | 1.28667e+07 | 1.28667e+07 |
| Angptl2  | Angptl2-002  | 0.0133912   | 7.96503     | 7.96503     |
| Ank      | Ank-001      | 0.027021    | 0.931816    | -1.07317    |
| Ank2     | Ank2-010     | 0.00473742  | 6.19571e+08 | 6.19571e+08 |
| Ank3     | Ank3-030     | 0.00121121  | 5.25334e-05 | -19035.5    |
| Ank3     | Ank3-018     | 0.0017414   | 0.00135739  | -736.71     |
| Ank3     | Ank3-024     | 0.047372    | 11.7946     | 11.7946     |
| Ankef1   | Ankef1-201   | 0.0150841   | 5.6729      | 5.6729      |
| Ankhd1   | Ankhd1-001   | 0.0131419   | 1.38639     | 1.38639     |
| Ankle2   | Ankle2-004   | 0.0407439   | 3843.63     | 3843.63     |
| Ankrd13c | Ankrd13c-008 | 0.00040767  | 8.62463     | 8.62463     |
| Ankrd29  | Ankrd29-001  | 0.0350632   | 0.787109    | -1.27047    |
| Ankrd50  | Ankrd50-201  | 0.0439326   | 0.602605    | -1.65946    |
| Ankrd9   | Ankrd9-003   | 0.0338412   | 1.66686     | 1.66686     |
| Anks1b   | Anks1b-012   | 0.0225763   | 0.39268     | -2.5466     |
| Anks1b   | Anks1b-026   | 0.0234546   | 0.144655    | -6.91298    |
| Ano1     | Ano1-007     | 0.0184628   | 0.0458311   | -21.8192    |



|             |                 |            |             |              |
|-------------|-----------------|------------|-------------|--------------|
| Ano4        | Ano4-003        | 0.035987   | 0.141603    | -7.06202     |
| Anp32a      | Anp32a-004      | 0.036369   | 1.75217     | 1.75217      |
| Anpep       | Anpep-005       | 0.021163   | 3.03204e-10 | -3.29811e+09 |
| Antxr1      | Antxr1-001      | 0.00163097 | 2.33076     | 2.33076      |
| Anxa3       | Anxa3-009       | 0.0196675  | 32.9593     | 32.9593      |
| Anxa5       | Anxa5-001       | 0.00252557 | 1.13313     | 1.13313      |
| Anxa9       | Anxa9-201       | 0.00462856 | 23.4817     | 23.4817      |
| Ap1s2       | Ap1s2-003       | 0.0282345  | 2.33173     | 2.33173      |
| Ap2b1       | Ap2b1-002       | 0.00897947 | 0.162054    | -6.17077     |
| Ap3b2       | Ap3b2-001       | 0.0109508  | 0.884208    | -1.13096     |
| Ap5z1       | Ap5z1-007       | 0.0395204  | 1.5098      | 1.5098       |
| Apbb1       | Apbb1-003       | 0.00853227 | 0.828177    | -1.20747     |
| Apbb1       | Apbb1-201       | 0.024579   | 1.17162     | 1.17162      |
| Apc         | Apc-201         | 0.0171358  | 0.916256    | -1.0914      |
| Apc         | Apc-007         | 0.0144655  | 0.104463    | -9.57278     |
| Apeh        | Apeh-005        | 0.0441034  | 6.11113     | 6.11113      |
| Apobec3     | Apobec3-202     | 0.00977299 | 35.8578     | 35.8578      |
| Apoe        | Apoe-006        | 0.0175333  | 1.40004     | 1.40004      |
| Ar          | Ar-001          | 0.00944434 | 0.860942    | -1.16152     |
| Araf        | Araf-006        | 0.0219353  | 0.531652    | -1.88093     |
| Araf        | Araf-001        | 0.00136741 | 2.56368     | 2.56368      |
| Arap1       | Arap1-017       | 0.00568345 | 21.6009     | 21.6009      |
| Areg        | Areg-001        | 0.0154633  | 10.4633     | 10.4633      |
| Arfgap1     | Arfgap1-010     | 0.0399152  | 0.765525    | -1.30629     |
| Arfgap1     | Arfgap1-012     | 0.0348895  | 0.0136841   | -73.0773     |
| Arfgap1     | Arfgap1-004     | 0.0480991  | 1.97265     | 1.97265      |
| Arfgap3     | Arfgap3-201     | 0.0229759  | 1.11901     | 1.11901      |
| Arfrp1      | Arfrp1-008      | 0.0309704  | 0.25351     | -3.94461     |
| Arfrp1      | Arfrp1-001      | 0.00696063 | 1.93405     | 1.93405      |
| Arhgap1     | Arhgap1-003     | 0.0405171  | 0.746935    | -1.3388      |
| Arhgap1     | Arhgap1-201     | 0.00333914 | 2.91592     | 2.91592      |
| Arhgap12    | Arhgap12-006    | 0.0167956  | 0.760551    | -1.31484     |
| Arhgap12    | Arhgap12-002    | 0.0240124  | 1.34822     | 1.34822      |
| Arhgap25    | Arhgap25-002    | 0.0311646  | 0.2991      | -3.34336     |
| Arhgap27os3 | Arhgap27os3-001 | 0.003864   | 0.277917    | -3.5982      |
| Arhgef16    | Arhgef16-005    | 0.0333069  | 6.13722     | 6.13722      |
| Arhgef2     | Arhgef2-028     | 0.0141913  | 2.00178     | 2.00178      |
| Arid1b      | Arid1b-001      | 0.0138756  | 0.869387    | -1.15024     |
| Arid3b      | Arid3b-201      | 0.0269778  | 1.30437     | 1.30437      |
| Arl4d       | Arl4d-001       | 0.00386582 | 1.38709     | 1.38709      |
| Arl5a       | Arl5a-001       | 0.0430249  | 0.878993    | -1.13767     |
| Arl6ip1     | Arl6ip1-005     | 0.0350491  | 0.0323913   | -30.8725     |
| Arl6ip6     | Arl6ip6-002     | 0.00522641 | 0.612563    | -1.63248     |

|          |              |            |             |              |
|----------|--------------|------------|-------------|--------------|
| Arl8a    | Arl8a-003    | 0.0332162  | 1.49672     | 1.49672      |
| Arl8b    | Arl8b-001    | 0.0278072  | 0.932889    | -1.07194     |
| Arl9     | Arl9-002     | 0.00557145 | 7.97867e-07 | -1.25334e+06 |
| Armcx1   | Armcx1-002   | 0.0307721  | 0.52673     | -1.89851     |
| Arntl2   | Arntl2-001   | 0.0141632  | 0.669028    | -1.49471     |
| Arpp19   | Arpp19-004   | 0.0161944  | 1.58516     | 1.58516      |
| Arpp21   | Arpp21-006   | 0.0272013  | 0.425561    | -2.34984     |
| Arpp21   | Arpp21-005   | 0.0270268  | 1.42882     | 1.42882      |
| Arrb2    | Arrb2-003    | 0.0215229  | 2.49876     | 2.49876      |
| Arrb2    | Arrb2-006    | 0.0158903  | 1.92298     | 1.92298      |
| Arsa     | Arsa-001     | 0.0419901  | 1.21248     | 1.21248      |
| Arsg     | Arsg-001     | 0.0347706  | 1.48793     | 1.48793      |
| Arsg     | Arsg-002     | 0.0104945  | 10.0138     | 10.0138      |
| Art3     | Art3-006     | 0.0267245  | 4.03335e-07 | -2.47933e+06 |
| Arvcf    | Arvcf-009    | 0.0178284  | 2.32509     | 2.32509      |
| Asb1     | Asb1-002     | 0.0446298  | 0.37013     | -2.70176     |
| Asb1     | Asb1-004     | 0.0298361  | 6.5275      | 6.5275       |
| Asb3     | Asb3-003     | 0.0271281  | 2.62189     | 2.62189      |
| Ash2l    | Ash2l-009    | 0.0408966  | 0.22268     | -4.49076     |
| Asic1    | Asic1-201    | 0.0417275  | 1.27086     | 1.27086      |
| Asl      | Asl-005      | 0.00154172 | 8.38395     | 8.38395      |
| Asl      | Asl-009      | 0.00837177 | 1.38317     | 1.38317      |
| Asphd2   | Asphd2-002   | 0.00186718 | 0.507668    | -1.96979     |
| Ass1     | Ass1-004     | 0.0192308  | 1598.88     | 1598.88      |
| Aste1    | Aste1-009    | 0.026037   | 0.2552      | -3.9185      |
| Atad3a   | Atad3a-004   | 0.010815   | 1.81152     | 1.81152      |
| Atcayos  | Atcayos-002  | 0.005154   | 0.561041    | -1.7824      |
| Ate1     | Ate1-202     | 0.0168816  | 0.704531    | -1.41938     |
| Atf1     | Atf1-002     | 0.0287362  | 0.00769692  | -129.922     |
| Atg16l1  | Atg16l1-011  | 0.00946414 | 1.46798     | 1.46798      |
| Atg4b    | Atg4b-003    | 0.0175557  | 86.6325     | 86.6325      |
| Atp10d   | Atp10d-001   | 0.00507833 | 2.40645     | 2.40645      |
| Atp13a2  | Atp13a2-006  | 0.00904076 | 0.0133732   | -74.7765     |
| Atp13a4  | Atp13a4-002  | 0.00519855 | 0.191974    | -5.20905     |
| Atp1b1   | Atp1b1-001   | 0.0302509  | 0.927266    | -1.07844     |
| Atp1b3   | Atp1b3-001   | 0.0445896  | 1.10894     | 1.10894      |
| Atp2b3   | Atp2b3-003   | 0.0251561  | 1.63199     | 1.63199      |
| Atp5j    | Atp5j-011    | 0.0295447  | 0.310867    | -3.21681     |
| Atp5sl   | Atp5sl-001   | 0.0345256  | 1.16036     | 1.16036      |
| Atp6ap1l | Atp6ap1l-001 | 0.0186989  | 16.819      | 16.819       |
| Atp6v0a1 | Atp6v0a1-001 | 0.0364628  | 0.899149    | -1.11216     |
| Atp6v0a2 | Atp6v0a2-001 | 0.027553   | 1.04955     | 1.04955      |
| Atp6v0a4 | Atp6v0a4-007 | 0.0335534  | 0.0102049   | -97.9917     |

|               |                   |             |             |          |
|---------------|-------------------|-------------|-------------|----------|
| Atp6v0e       | Atp6v0e-201       | 0.0414735   | 1.27146     | 1.27146  |
| Atp6v1a       | Atp6v1a-001       | 0.0421562   | 0.872967    | -1.14552 |
| Atp6v1c2      | Atp6v1c2-006      | 9.9614e-07  | 32037.8     | 32037.8  |
| Atp6v1g2      | Atp6v1g2-004      | 0.0115584   | 5.88695     | 5.88695  |
| Atp6v1h       | Atp6v1h-006       | 0.0241225   | 0.892265    | -1.12074 |
| Atp7a         | Atp7a-002         | 0.0477381   | 2.37379     | 2.37379  |
| Atp8a1        | Atp8a1-004        | 0.0199078   | 0.13527     | -7.39264 |
| Atpaf1        | Atpaf1-005        | 0.0123243   | 4.26771     | 4.26771  |
| Atpaf2        | Atpaf2-006        | 0.00952668  | 6.1188      | 6.1188   |
| Atraid        | Atraid-002        | 0.0325326   | 0.323279    | -3.09331 |
| Atxn3         | Atxn3-005         | 0.0318039   | 2490.3      | 2490.3   |
| AU021092      | AU021092-001      | 0.0139642   | 1.43217     | 1.43217  |
| AU022252      | AU022252-001      | 0.0430565   | 0.704143    | -1.42017 |
| Auts2         | Auts2-003         | 0.0199646   | 0.223106    | -4.48217 |
| Awat2         | Awat2-002         | 0.0335219   | 9962.11     | 9962.11  |
| Axin1         | Axin1-201         | 0.00171809  | 1.76626     | 1.76626  |
| Azi2          | Azi2-005          | 0.0439423   | 4.33636     | 4.33636  |
| B020004C17Rik | B020004C17Rik-201 | 0.0440607   | 0.448536    | -2.22948 |
| B230118H07Rik | B230118H07Rik-009 | 0.0469179   | 0.150776    | -6.63234 |
| B3galt1       | B3galt1-002       | 0.0369165   | 0.768195    | -1.30175 |
| B3galt2       | B3galt2-001       | 0.0082246   | 0.837364    | -1.19422 |
| B3gat1        | B3gat1-003        | 0.0275893   | 0.27576     | -3.62635 |
| B3gat2        | B3gat2-003        | 0.0373991   | 0.000830983 | -1203.39 |
| B3gnt5        | B3gnt5-001        | 0.0427959   | 0.171826    | -5.81985 |
| B3gnt8        | B3gnt8-004        | 0.0233941   | 0.323817    | -3.08817 |
| Bag2          | Bag2-004          | 0.0152441   | 0.000362121 | -2761.51 |
| Bag6          | Bag6-004          | 0.0147244   | 1.52695     | 1.52695  |
| Baiap2        | Baiap2-001        | 0.0402378   | 1.32246     | 1.32246  |
| Baiap3        | Baiap3-007        | 0.00129155  | 7.66448     | 7.66448  |
| Banp          | Banp-002          | 0.0203402   | 1.62744     | 1.62744  |
| Batf3         | Batf3-001         | 0.0114313   | 2.31149     | 2.31149  |
| BB218582      | BB218582-002      | 0.0264687   | 0.230731    | -4.33405 |
| BB218582      | BB218582-003      | 0.00976504  | 0.145484    | -6.8736  |
| Bbs9          | Bbs9-006          | 0.0188851   | 7.02957     | 7.02957  |
| Bbx           | Bbx-003           | 0.0249326   | 0.147125    | -6.79692 |
| BC017158      | BC017158-003      | 0.0498526   | 6.67197     | 6.67197  |
| BC026585      | BC026585-001      | 0.031127    | 1.26788     | 1.26788  |
| BC029214      | BC029214-002      | 0.0278247   | 1.65859     | 1.65859  |
| BC029214      | BC029214-012      | 0.0132889   | 5.87715     | 5.87715  |
| BC035044      | BC035044-001      | 0.000972094 | 3.14682     | 3.14682  |
| BC037032      | BC037032-002      | 0.0451274   | 151577      | 151577   |
| BC046251      | BC046251-001      | 0.0236543   | 2.59537     | 2.59537  |
| BC055308      | BC055308-001      | 0.0256288   | 0.517935    | -1.93075 |

|          |              |             |           |          |
|----------|--------------|-------------|-----------|----------|
| BC065403 | BC065403-002 | 0.0478501   | 64.0095   | 64.0095  |
| Bcam     | Bcam-001     | 0.0417478   | 1.55806   | 1.55806  |
| Bcar1    | Bcar1-201    | 0.022864    | 1.12132   | 1.12132  |
| Bcar3    | Bcar3-001    | 0.0211031   | 1.39923   | 1.39923  |
| Bccip    | Bccip-001    | 0.0197298   | 0.898271  | -1.11325 |
| Bccip    | Bccip-005    | 0.0149632   | 2.15993   | 2.15993  |
| Bcl11a   | Bcl11a-006   | 0.0151386   | 0.875651  | -1.14201 |
| Bcl2     | Bcl2-001     | 0.00317438  | 1.31699   | 1.31699  |
| Bcl2l11  | Bcl2l11-005  | 0.0290861   | 0.11405   | -8.76806 |
| Bcl9l    | Bcl9l-201    | 0.0480612   | 1.12181   | 1.12181  |
| Bdnf     | Bdnf-007     | 0.000795886 | 0.588271  | -1.6999  |
| Bdnf     | Bdnf-006     | 0.0451855   | 1.31801   | 1.31801  |
| Bet1     | Bet1-004     | 0.0343519   | 0.0169728 | -58.9178 |
| Bhlhe40  | Bhlhe40-004  | 0.027337    | 0.713291  | -1.40195 |
| Bhmt     | Bhmt-001     | 0.0353233   | 3.87299   | 3.87299  |
| Blvrb    | Blvrb-002    | 0.0248401   | 3.70838   | 3.70838  |
| Blzf1    | Blzf1-002    | 0.0392335   | 0.678318  | -1.47423 |
| Bmp4     | Bmp4-001     | 0.0143153   | 4.68443   | 4.68443  |
| Bmp8b    | Bmp8b-001    | 0.0243285   | 0.258535  | -3.86794 |
| Bmpr1a   | Bmpr1a-001   | 0.0442701   | 1.0726    | 1.0726   |
| Bms1     | Bms1-002     | 0.0446345   | 0.540274  | -1.85091 |
| Bnc2     | Bnc2-012     | 0.00983234  | 0.0729942 | -13.6997 |
| Bnip1    | Bnip1-002    | 0.0382425   | 0.407341  | -2.45495 |
| Bnip2    | Bnip2-201    | 0.0356005   | 4.20124   | 4.20124  |
| Bok      | Bok-005      | 0.0252033   | 2.31992   | 2.31992  |
| Borcs8   | Borcs8-003   | 0.0319373   | 0.355302  | -2.8145  |
| Bpnt1    | Bpnt1-001    | 0.0481428   | 1.06657   | 1.06657  |
| Brap     | Brap-003     | 0.00191227  | 2.05586   | 2.05586  |
| Brcc3    | Brcc3-006    | 0.0325703   | 5.17447   | 5.17447  |
| Brd3     | Brd3-001     | 0.0376103   | 0.592016  | -1.68914 |
| Brd8     | Brd8-007     | 0.000448145 | 0.12229   | -8.17726 |
| Brd8     | Brd8-002     | 0.0444486   | 1.24358   | 1.24358  |
| Brinp1   | Brinp1-001   | 0.0448537   | 0.904096  | -1.10608 |
| Brinp2   | Brinp2-002   | 0.0281798   | 2.35234   | 2.35234  |
| Brox     | Brox-005     | 0.000177068 | 0.10112   | -9.88926 |
| Brox     | Brox-001     | 0.00218093  | 0.613525  | -1.62992 |
| Brox     | Brox-002     | 0.0277557   | 1.15803   | 1.15803  |
| Brpf3    | Brpf3-005    | 0.0426692   | 0.0660672 | -15.1361 |
| Brpf3    | Brpf3-002    | 0.0183653   | 1.97994   | 1.97994  |
| Brwd1    | Brwd1-005    | 0.0482622   | 3.10704   | 3.10704  |
| Btbd10   | Btbd10-001   | 0.00835708  | 1.29565   | 1.29565  |
| Btbd6    | Btbd6-202    | 9.65798e-05 | 0.761145  | -1.31381 |
| Btbd6    | Btbd6-201    | 0.0209551   | 1.58264   | 1.58264  |

|               |                   |             |          |          |
|---------------|-------------------|-------------|----------|----------|
| Btf3l4        | Btf3l4-003        | 0.0408991   | 0.541999 | -1.84502 |
| Btnl9         | Btnl9-001         | 0.0416848   | 12.4601  | 12.4601  |
| Bud13         | Bud13-002         | 0.0362608   | 0.118378 | -8.44751 |
| Bzrap1        | Bzrap1-001        | 0.00315183  | 1.2728   | 1.2728   |
| Bzrap1        | Bzrap1-004        | 0.020373    | 1.24217  | 1.24217  |
| C030005K06Rik | C030005K06Rik-003 | 0.00997306  | 0.149185 | -6.70307 |
| C030014I23Rik | C030014I23Rik-201 | 0.0204717   | 0.84928  | -1.17747 |
| C030034I22Rik | C030034I22Rik-001 | 0.0325      | 0.65144  | -1.53506 |
| C030037D09Rik | C030037D09Rik-001 | 1.42509e-09 | 0.238256 | -4.19716 |
| C030037D09Rik | C030037D09Rik-002 | 5.17248e-07 | 6.25682  | 6.25682  |
| C130071C03Rik | C130071C03Rik-003 | 0.0325999   | 0.386078 | -2.59015 |
| C1d           | C1d-003           | 0.0487736   | 1.31695  | 1.31695  |
| C1qtnf5       | C1qtnf5-002       | 0.0450701   | 0.114427 | -8.73921 |
| C1ra          | C1ra-001          | 0.0474576   | 1.63581  | 1.63581  |
| C230004F18Rik | C230004F18Rik-002 | 0.0456409   | 1.48121  | 1.48121  |
| C230024C17Rik | C230024C17Rik-001 | 0.0155578   | 0.35648  | -2.80521 |
| C230031I18Rik | C230031I18Rik-001 | 0.0463056   | 2.28735  | 2.28735  |
| C2cd5         | C2cd5-008         | 0.0326395   | 0.25592  | -3.90747 |
| C2cd5         | C2cd5-012         | 0.00749521  | 4.90363  | 4.90363  |
| C330007P06Rik | C330007P06Rik-001 | 0.0209041   | 0.906545 | -1.10309 |
| C330007P06Rik | C330007P06Rik-201 | 0.0210009   | 0.906606 | -1.10302 |
| C4a           | C4a-010           | 0.0369766   | 5.84867  | 5.84867  |
| C4a           | C4a-008           | 0.0400947   | 4255.12  | 4255.12  |
| C6            | C6-001            | 0.0139134   | 7.4128   | 7.4128   |
| C630004L07Rik | C630004L07Rik-201 | 0.0264872   | 5.55441  | 5.55441  |
| C630004L07Rik | C630004L07Rik-001 | 0.0264872   | 5.55441  | 5.55441  |
| Cables1       | Cables1-202       | 0.00776345  | 2.3613   | 2.3613   |
| Cables2       | Cables2-001       | 0.0476424   | 0.844683 | -1.18388 |
| Cacfd1        | Cacfd1-002        | 0.00317988  | 1.17287  | 1.17287  |
| Cacna1b       | Cacna1b-003       | 0.0238444   | 0.640015 | -1.56246 |
| Cacna1b       | Cacna1b-005       | 0.0299767   | 0.244491 | -4.09013 |
| Cacna1c       | Cacna1c-015       | 0.0448464   | 0.134137 | -7.45508 |
| Cacna1e       | Cacna1e-002       | 0.0295403   | 0.686691 | -1.45626 |
| Cacna1f       | Cacna1f-004       | 0.00241977  | 6.67488  | 6.67488  |
| Cacna1g       | Cacna1g-004       | 0.0490033   | 1.39749  | 1.39749  |
| Cacna1g       | Cacna1g-010       | 0.00983254  | 1.49036  | 1.49036  |
| Cacna1h       | Cacna1h-003       | 0.0253349   | 1.72554  | 1.72554  |
| Cacna2d1      | Cacna2d1-006      | 0.0123445   | 0.925676 | -1.08029 |
| Cacna2d2      | Cacna2d2-003      | 0.0412217   | 1.51903  | 1.51903  |
| Cacna2d4      | Cacna2d4-001      | 0.0382586   | 1.4952   | 1.4952   |
| Cacnb2        | Cacnb2-010        | 0.00506164  | 0.656803 | -1.52253 |
| Calca         | Calca-003         | 0.00984005  | 0.134646 | -7.42685 |
| Calcoco1      | Calcoco1-001      | 0.0176374   | 1.09438  | 1.09438  |

|           |               |            |             |             |
|-----------|---------------|------------|-------------|-------------|
| Caln1     | Caln1-005     | 0.0241711  | 0.628222    | -1.59179    |
| Calu      | Calu-001      | 0.022926   | 1.13051     | 1.13051     |
| Camk2d    | Camk2d-006    | 0.00827557 | 6.22076     | 6.22076     |
| Camkk2    | Camkk2-005    | 0.0184533  | 0.620928    | -1.61049    |
| Camta1    | Camta1-012    | 0.0315647  | 0.866661    | -1.15385    |
| Camta1    | Camta1-003    | 0.0118298  | 0.523319    | -1.91088    |
| Camta2    | Camta2-008    | 0.0173864  | 0.811152    | -1.23281    |
| Cant1     | Cant1-001     | 0.0438778  | 0.237886    | -4.2037     |
| Capn1     | Capn1-202     | 0.0235406  | 0.831498    | -1.20265    |
| Capn2     | Capn2-004     | 0.0100529  | 3.84361     | 3.84361     |
| Capn3     | Capn3-005     | 0.0314184  | 0.373324    | -2.67863    |
| Capn3     | Capn3-002     | 0.0204427  | 3.2568      | 3.2568      |
| Capn8     | Capn8-003     | 0.0381844  | 35.2878     | 35.2878     |
| Capn8     | Capn8-201     | 0.0381844  | 35.2878     | 35.2878     |
| Capns1    | Capns1-006    | 0.0476509  | 0.260587    | -3.83749    |
| Caprin1   | Caprin1-004   | 0.0407673  | 8.68101     | 8.68101     |
| Car15     | Car15-001     | 0.0284286  | 1.21211     | 1.21211     |
| Car9      | Car9-007      | 0.0405983  | 0.000663086 | -1508.1     |
| Card10    | Card10-001    | 0.00604003 | 0.870322    | -1.149      |
| Card9     | Card9-002     | 0.00999542 | 0.33354     | -2.99814    |
| Carhsp1   | Carhsp1-201   | 0.0305276  | 1.20902     | 1.20902     |
| Carm1     | Carm1-001     | 0.0163069  | 1.19359     | 1.19359     |
| Caskin2   | Caskin2-001   | 0.0320561  | 1.09178     | 1.09178     |
| Casp6     | Casp6-004     | 0.0226712  | 1.77951     | 1.77951     |
| Catsperg1 | Catsperg1-005 | 0.0460555  | 0.350917    | -2.84967    |
| Catsperg1 | Catsperg1-006 | 0.0187513  | 5.42515     | 5.42515     |
| Cbfb      | Cbfb-002      | 0.0106019  | 5.75911     | 5.75911     |
| Cbll1     | Cbll1-202     | 0.0350436  | 0.0826851   | -12.0941    |
| Cbx1      | Cbx1-002      | 0.0326135  | 548.27      | 548.27      |
| Cbx3      | Cbx3-003      | 0.0154721  | 0.69274     | -1.44354    |
| Cbx7      | Cbx7-008      | 0.0346102  | 26209.3     | 26209.3     |
| Ccdc109b  | Ccdc109b-001  | 0.0266037  | 0.473995    | -2.10973    |
| Ccdc109b  | Ccdc109b-004  | 0.0460418  | 6.68324     | 6.68324     |
| Ccdc125   | Ccdc125-201   | 0.0165863  | 0.230467    | -4.33902    |
| Ccdc125   | Ccdc125-202   | 0.00624256 | 8.4137      | 8.4137      |
| Ccdc130   | Ccdc130-006   | 0.0184175  | 2.50905     | 2.50905     |
| Ccdc137   | Ccdc137-005   | 0.0326756  | 2.91206e+08 | 2.91206e+08 |
| Ccdc146   | Ccdc146-002   | 0.0443471  | 4.47345     | 4.47345     |
| Ccdc151   | Ccdc151-202   | 0.0223817  | 1.97954     | 1.97954     |
| Ccdc157   | Ccdc157-001   | 0.0393506  | 1.50188     | 1.50188     |
| Ccdc171   | Ccdc171-001   | 0.0182     | 0.317028    | -3.1543     |
| Ccdc173   | Ccdc173-001   | 0.0388838  | 1.49847     | 1.49847     |
| Ccdc28b   | Ccdc28b-009   | 0.0203246  | 1.82859     | 1.82859     |

|          |              |            |             |              |
|----------|--------------|------------|-------------|--------------|
| Ccdc37   | Ccdc37-005   | 0.021579   | 0.651957    | -1.53384     |
| Ccdc47   | Ccdc47-004   | 0.037079   | 3.20905     | 3.20905      |
| Ccdc6    | Ccdc6-001    | 0.0456517  | 1.14503     | 1.14503      |
| Ccdc61   | Ccdc61-004   | 0.0260923  | 21.1474     | 21.1474      |
| Ccdc64   | Ccdc64-007   | 0.0332713  | 1.26849     | 1.26849      |
| Ccdc8    | Ccdc8-001    | 0.0432581  | 1.3113      | 1.3113       |
| Ccdc82   | Ccdc82-202   | 0.0283853  | 0.70316     | -1.42215     |
| Ccdc82   | Ccdc82-201   | 0.00590146 | 1.48973     | 1.48973      |
| Ccdc85a  | Ccdc85a-001  | 0.0069989  | 0.722996    | -1.38313     |
| Cchcr1   | Cchcr1-007   | 0.0422463  | 3.51957     | 3.51957      |
| Ccl12    | Ccl12-001    | 0.0211942  | 0.00152186  | -657.093     |
| Ccl27a   | Ccl27a-201   | 0.0114201  | 163.58      | 163.58       |
| Ccl27a   | Ccl27a-001   | 0.0214294  | 256.924     | 256.924      |
| Ccl6     | Ccl6-002     | 0.00806116 | 2.98399     | 2.98399      |
| Ccm2     | Ccm2-003     | 0.0104385  | 2.8819      | 2.8819       |
| Ccm2l    | Ccm2l-001    | 0.00627773 | 5.3248      | 5.3248       |
| Ccnd2    | Ccnd2-004    | 0.0175273  | 0.502388    | -1.99049     |
| Ccnd3    | Ccnd3-006    | 0.0282676  | 1.38873     | 1.38873      |
| Ccndbp1  | Ccndbp1-007  | 0.00571542 | 0.000757136 | -1320.77     |
| Ccnl1    | Ccnl1-009    | 0.0073042  | 2.75843     | 2.75843      |
| Ccr5     | Ccr5-004     | 0.0463457  | 0.00078038  | -1281.43     |
| Ccr6     | Ccr6-205     | 0.00680516 | 0.00245108  | -407.984     |
| Ccser1   | Ccser1-002   | 0.0335904  | 0.400869    | -2.49458     |
| Ccser2   | Ccser2-010   | 0.0359174  | 0.645112    | -1.55012     |
| Ccser2   | Ccser2-005   | 0.0136543  | 4.35109     | 4.35109      |
| Cct3     | Cct3-007     | 0.0437777  | 6.70204     | 6.70204      |
| Ccz1     | Ccz1-003     | 0.0241996  | 2.51859     | 2.51859      |
| Cd151    | Cd151-203    | 0.0135872  | 1.69479     | 1.69479      |
| Cd36     | Cd36-002     | 0.0295469  | 0.209227    | -4.77949     |
| Cd5      | Cd5-201      | 0.0328791  | 8.18476     | 8.18476      |
| Cd7      | Cd7-001      | 0.0146597  | 5.10934     | 5.10934      |
| Cd82     | Cd82-003     | 0.00898606 | 0.048388    | -20.6663     |
| Cd82     | Cd82-006     | 0.0467593  | 0.0114894   | -87.0368     |
| Cd82     | Cd82-004     | 0.0346035  | 2.73809e+10 | 2.73809e+10  |
| Cd82     | Cd82-009     | 0.0445678  | 3.24308e+10 | 3.24308e+10  |
| Cd84     | Cd84-001     | 0.0338194  | 0.854259    | -1.1706      |
| Cd8a     | Cd8a-003     | 0.019846   | 3.08502     | 3.08502      |
| Cdc23    | Cdc23-006    | 0.0454747  | 2.51138     | 2.51138      |
| Cdc25a   | Cdc25a-002   | 0.0346194  | 2.32276e-08 | -4.30522e+07 |
| Cdc40    | Cdc40-201    | 0.0106702  | 0.831956    | -1.20199     |
| Cdc42bpa | Cdc42bpa-014 | 0.0422371  | 0.684054    | -1.46187     |
| Cdc42bpa | Cdc42bpa-008 | 0.0233315  | 2.36372     | 2.36372      |
| Cdc42se2 | Cdc42se2-002 | 0.0431387  | 1.55e+10    | 1.55e+10     |

|          |              |            |             |              |
|----------|--------------|------------|-------------|--------------|
| Cdc7     | Cdc7-005     | 0.00165231 | 0.123796    | -8.07779     |
| Cdca3    | Cdca3-003    | 0.0451626  | 3.41745e-05 | -29261.6     |
| Cdh10    | Cdh10-001    | 0.0367301  | 0.828567    | -1.2069      |
| Cdh11    | Cdh11-201    | 0.00548658 | 0.890804    | -1.12258     |
| Cdh7     | Cdh7-201     | 0.0343765  | 12.2791     | 12.2791      |
| Cdh9     | Cdh9-001     | 0.0364683  | 0.828526    | -1.20696     |
| Cdhr4    | Cdhr4-006    | 0.0374062  | 3.29872e-09 | -3.03148e+08 |
| Cdk12    | Cdk12-007    | 0.0297013  | 7.90252     | 7.90252      |
| Cdk2     | Cdk2-201     | 0.0499883  | 0.284941    | -3.5095      |
| Cdk2     | Cdk2-202     | 0.0463784  | 21.3147     | 21.3147      |
| Cdk4     | Cdk4-009     | 0.0060361  | 0.492866    | -2.02895     |
| Cdk5rap2 | Cdk5rap2-006 | 0.0480953  | 2.32244     | 2.32244      |
| Cdk7     | Cdk7-201     | 0.0176604  | 0.903625    | -1.10665     |
| Cdk8     | Cdk8-004     | 0.0245891  | 2.45521     | 2.45521      |
| Cdkl3    | Cdkl3-204    | 0.0127635  | 0.313625    | -3.18853     |
| Cdkn1a   | Cdkn1a-001   | 0.022675   | 1.71382     | 1.71382      |
| Cdon     | Cdon-201     | 0.0156747  | 0.63231     | -1.5815      |
| Cdon     | Cdon-001     | 0.0299162  | 1.61618     | 1.61618      |
| Cdr2     | Cdr2-001     | 0.0315925  | 2.39405     | 2.39405      |
| Cdv3     | Cdv3-007     | 0.0484159  | 0.0158251   | -63.1907     |
| Ceacam1  | Ceacam1-004  | 0.0472412  | 0.230061    | -4.34667     |
| Celsr3   | Celsr3-004   | 0.0210617  | 2.72042     | 2.72042      |
| Cenpc1   | Cenpc1-001   | 0.0352743  | 0.899788    | -1.11137     |
| Cenpi    | Cenpi-003    | 0.014442   | 17.6449     | 17.6449      |
| Cenpj    | Cenpj-001    | 0.00291129 | 1.48217     | 1.48217      |
| Cenpv    | Cenpv-002    | 0.0384634  | 0.275453    | -3.63038     |
| Cep104   | Cep104-001   | 0.0069911  | 1.18592     | 1.18592      |
| Cep112   | Cep112-007   | 0.00399912 | 7.69005e-05 | -13003.8     |
| Cep112   | Cep112-201   | 0.0363419  | 4.33784     | 4.33784      |
| Cep126   | Cep126-201   | 0.0433391  | 1.19565     | 1.19565      |
| Cep131   | Cep131-006   | 0.0224493  | 1.42536     | 1.42536      |
| Cep131   | Cep131-201   | 0.0292804  | 1.37674     | 1.37674      |
| Cep290   | Cep290-201   | 0.0318487  | 1.18555     | 1.18555      |
| Cep41    | Cep41-010    | 0.0310366  | 6640.9      | 6640.9       |
| Cep70    | Cep70-001    | 0.0149157  | 0.811156    | -1.23281     |
| Cep83os  | Cep83os-201  | 0.00960064 | 0.834323    | -1.19858     |
| Cep89    | Cep89-009    | 0.0249805  | 0.157773    | -6.33822     |
| Cers3    | Cers3-001    | 0.0243859  | 1.85992     | 1.85992      |
| Cers4    | Cers4-009    | 0.0316354  | 86.36       | 86.36        |
| Cers4    | Cers4-002    | 0.00889707 | 1.3107      | 1.3107       |
| Cetn4    | Cetn4-004    | 0.0074835  | 0.520864    | -1.91989     |
| Cfap126  | Cfap126-002  | 0.0422563  | 3.58301     | 3.58301      |
| Cfap46   | Cfap46-007   | 0.00710088 | 7.85505     | 7.85505      |



|         |             |             |            |          |
|---------|-------------|-------------|------------|----------|
| Cfap46  | Cfap46-005  | 0.0233528   | 9.3058     | 9.3058   |
| Cfap69  | Cfap69-002  | 0.0389025   | 291.04     | 291.04   |
| Cfap70  | Cfap70-001  | 0.0282429   | 16.0738    | 16.0738  |
| Cflar   | Cflar-007   | 0.0261489   | 0.512124   | -1.95265 |
| Cgn     | Cgn-001     | 0.0303278   | 2.42938    | 2.42938  |
| Cgnl1   | Cgnl1-003   | 0.000639395 | 2.8811     | 2.8811   |
| Chd2    | Chd2-005    | 0.000557871 | 0.00122887 | -813.754 |
| Chd2    | Chd2-011    | 0.00301621  | 0.0973671  | -10.2704 |
| Chd2    | Chd2-013    | 0.031892    | 0.00229426 | -435.87  |
| Chdh    | Chdh-001    | 0.0456269   | 1.4644     | 1.4644   |
| Chfr    | Chfr-005    | 0.0400158   | 2.54565    | 2.54565  |
| Chid1   | Chid1-004   | 0.0141592   | 1.31306    | 1.31306  |
| Chil1   | Chil1-002   | 0.0479877   | 1.27842    | 1.27842  |
| Chka    | Chka-003    | 0.00860197  | 5.03396    | 5.03396  |
| Chl1    | Chl1-001    | 0.0350594   | 0.891653   | -1.12151 |
| Chmp2a  | Chmp2a-201  | 0.0217462   | 1.12652    | 1.12652  |
| Chn1    | Chn1-007    | 0.0161259   | 0.834466   | -1.19837 |
| Chn1os1 | Chn1os1-001 | 0.0392673   | 0.614968   | -1.6261  |
| Chn1os3 | Chn1os3-001 | 0.0239777   | 0.772096   | -1.29518 |
| Chn2    | Chn2-001    | 0.0307711   | 1.70334    | 1.70334  |
| Chrdl1  | Chrdl1-002  | 0.026529    | 1.41402    | 1.41402  |
| Chrm1   | Chrm1-201   | 0.0156238   | 0.854865   | -1.16978 |
| Chrm4   | Chrm4-001   | 0.0175943   | 1.5026     | 1.5026   |
| Chrna2  | Chrna2-001  | 0.0428928   | 0.669257   | -1.49419 |
| Chrna7  | Chrna7-201  | 0.0242936   | 0.810186   | -1.23428 |
| Chst8   | Chst8-004   | 0.00790909  | 0.519051   | -1.92659 |
| Chtop   | Chtop-007   | 0.0413137   | 1.25748    | 1.25748  |
| Ciao1   | Ciao1-003   | 0.0122901   | 16.6419    | 16.6419  |
| Ciao1   | Ciao1-002   | 0.0148547   | 1.55955    | 1.55955  |
| Cib1    | Cib1-004    | 0.0221115   | 2.87228    | 2.87228  |
| Cipc    | Cipc-001    | 0.0346338   | 1.07892    | 1.07892  |
| Cipc    | Cipc-201    | 0.0346338   | 1.07892    | 1.07892  |
| Cisd2   | Cisd2-004   | 0.0298899   | 0.0317611  | -31.4851 |
| Cish    | Cish-003    | 0.0280618   | 2.65366    | 2.65366  |
| Ciz1    | Ciz1-015    | 0.0109759   | 0.408451   | -2.44827 |
| Ckmt1   | Ckmt1-008   | 0.0256958   | 0.0728823  | -13.7208 |
| Cks1brt | Cks1brt-201 | 0.0497698   | 0.496671   | -2.0134  |
| Clasp1  | Clasp1-201  | 0.00196033  | 0.455371   | -2.19601 |
| Clasp1  | Clasp1-202  | 0.0342074   | 0.277938   | -3.59793 |
| Clasp1  | Clasp1-020  | 0.0137159   | 0.193124   | -5.17803 |
| Clasp1  | Clasp1-003  | 0.0374056   | 0.622848   | -1.60553 |
| Clasp1  | Clasp1-022  | 0.00988962  | 1.23199    | 1.23199  |
| Clasp1  | Clasp1-013  | 0.0267903   | 1.205      | 1.205    |

|         |             |            |             |             |
|---------|-------------|------------|-------------|-------------|
| Clasp1  | Clasp1-006  | 0.0111777  | 3.55041     | 3.55041     |
| Clcc1   | Clcc1-001   | 0.0476744  | 0.743753    | -1.34453    |
| Clcf1   | Clcf1-003   | 0.00571561 | 2.17766     | 2.17766     |
| Clcn1   | Clcn1-007   | 0.0315708  | 9.00501     | 9.00501     |
| Clcn3   | Clcn3-004   | 0.0322636  | 0.702614    | -1.42326    |
| Clcn3   | Clcn3-010   | 0.0269445  | 0.742465    | -1.34687    |
| Cldn1   | Cldn1-001   | 0.0388446  | 3.30117     | 3.30117     |
| Cldn12  | Cldn12-003  | 0.0481508  | 1.72776     | 1.72776     |
| Cldn3   | Cldn3-001   | 0.0339231  | 4.14916     | 4.14916     |
| Clec16a | Clec16a-001 | 0.0153461  | 0.902583    | -1.10793    |
| Clec4a2 | Clec4a2-001 | 0.0016364  | 2.8271      | 2.8271      |
| Clec5a  | Clec5a-002  | 0.0427316  | 0.401924    | -2.48803    |
| Clhc1   | Clhc1-002   | 0.00360925 | 0.183207    | -5.45832    |
| Clic3   | Clic3-001   | 0.0136308  | 37.0522     | 37.0522     |
| Clic5   | Clic5-201   | 0.0264402  | 1.20187     | 1.20187     |
| Clip1   | Clip1-008   | 0.0314354  | 1.94066     | 1.94066     |
| Clip2   | Clip2-001   | 0.0461848  | 0.784578    | -1.27457    |
| Clip2   | Clip2-002   | 0.0151317  | 1.11767     | 1.11767     |
| Clip3   | Clip3-006   | 0.0252513  | 1.06969e+09 | 1.06969e+09 |
| Cln3    | Cln3-017    | 0.0174435  | 0.297959    | -3.35617    |
| Cln5    | Cln5-201    | 0.0111392  | 1.18092     | 1.18092     |
| Cln6    | Cln6-001    | 0.0155882  | 0.780604    | -1.28106    |
| Clns1a  | Clns1a-001  | 0.019076   | 0.88587     | -1.12883    |
| Clstn2  | Clstn2-001  | 0.0262684  | 0.873749    | -1.14449    |
| Clstn3  | Clstn3-004  | 0.0427644  | 0.314634    | -3.17829    |
| Clstn3  | Clstn3-002  | 0.0079748  | 1.30103     | 1.30103     |
| Cltc    | Cltc-005    | 0.0149994  | 0.298078    | -3.35482    |
| Cmas    | Cmas-003    | 0.0443124  | 0.690963    | -1.44725    |
| Cml3    | Cml3-001    | 0.0459929  | 1.35799     | 1.35799     |
| Cmpk1   | Cmpk1-004   | 0.00178633 | 1.27561     | 1.27561     |
| Cnksr2  | Cnksr2-002  | 0.0210159  | 0.849268    | -1.17748    |
| Cnksr3  | Cnksr3-001  | 0.0074134  | 1.66223     | 1.66223     |
| Cnnm1   | Cnnm1-201   | 0.0285883  | 0.953021    | -1.04929    |
| Cnnm2   | Cnnm2-201   | 0.0288134  | 1.63845     | 1.63845     |
| Cnot11  | Cnot11-201  | 0.0349048  | 1.1528      | 1.1528      |
| Cnot2   | Cnot2-009   | 0.0218116  | 0.391273    | -2.55576    |
| Cnot4   | Cnot4-002   | 0.0434615  | 0.581203    | -1.72057    |
| Cnot4   | Cnot4-004   | 0.0194412  | 0.366024    | -2.73206    |
| Cnot4   | Cnot4-005   | 0.00101074 | 1.46777     | 1.46777     |
| Cnot6   | Cnot6-001   | 0.0114967  | 1.13472     | 1.13472     |
| Cnot6   | Cnot6-201   | 0.0423425  | 1.75815     | 1.75815     |
| Cnot7   | Cnot7-003   | 0.0296238  | 0.547296    | -1.82717    |
| Cnpy3   | Cnpy3-002   | 0.0463781  | 2.27418     | 2.27418     |

|          |              |             |             |              |
|----------|--------------|-------------|-------------|--------------|
| Cnr1     | Cnr1-001     | 0.000414998 | 0.829399    | -1.20569     |
| Cnst     | Cnst-001     | 0.00054801  | 1.23702     | 1.23702      |
| Cntln    | Cntln-002    | 0.0330533   | 2.58403     | 2.58403      |
| Cntn2    | Cntn2-003    | 0.0430998   | 1.29022     | 1.29022      |
| Cntn6    | Cntn6-001    | 0.0130008   | 2.70772     | 2.70772      |
| Cntrl    | Cntrl-012    | 0.0461858   | 1.25179e-09 | -7.98853e+08 |
| Coa4     | Coa4-003     | 0.0274823   | 2.31649     | 2.31649      |
| Coa7     | Coa7-004     | 0.0187564   | 1.64862     | 1.64862      |
| Cog1     | Cog1-001     | 0.00192859  | 0.89627     | -1.11574     |
| Cog1     | Cog1-006     | 0.0289388   | 1.58176     | 1.58176      |
| Cog1     | Cog1-008     | 0.0159892   | 2.24093     | 2.24093      |
| Cog6     | Cog6-002     | 0.0466129   | 2.92595     | 2.92595      |
| Coil     | Coil-001     | 0.0310279   | 37.9789     | 37.9789      |
| Col16a1  | Col16a1-004  | 0.0471674   | 1.30213     | 1.30213      |
| Col18a1  | Col18a1-003  | 0.012069    | 207.261     | 207.261      |
| Col19a1  | Col19a1-001  | 0.0252518   | 0.526103    | -1.90077     |
| Col1a2   | Col1a2-010   | 0.0326698   | 4.00819e-11 | -2.49489e+10 |
| Col26a1  | Col26a1-003  | 0.0485084   | 5.36089e+06 | 5.36089e+06  |
| Col2a1   | Col2a1-005   | 0.0379526   | 608559      | 608559       |
| Col4a3bp | Col4a3bp-202 | 0.0342384   | 0.661388    | -1.51197     |
| Col4a3bp | Col4a3bp-201 | 0.00515542  | 1.15901     | 1.15901      |
| Col8a2   | Col8a2-001   | 0.048425    | 6.54915     | 6.54915      |
| Col9a3   | Col9a3-003   | 0.015973    | 185768      | 185768       |
| Col9a3   | Col9a3-001   | 0.0484315   | 5.00158     | 5.00158      |
| Copg2    | Copg2-001    | 0.036709    | 0.877314    | -1.13984     |
| Cops5    | Cops5-007    | 0.0301045   | 1.2662      | 1.2662       |
| Cops7b   | Cops7b-001   | 0.0130872   | 1.87923     | 1.87923      |
| Coq10b   | Coq10b-001   | 0.0104049   | 1.25696     | 1.25696      |
| Coq5     | Coq5-003     | 0.0116562   | 7.6476      | 7.6476       |
| Coq6     | Coq6-008     | 0.0359079   | 0.00288174  | -347.012     |
| Coq9     | Coq9-006     | 0.0317859   | 1.52041     | 1.52041      |
| Coro1c   | Coro1c-008   | 0.0471493   | 2.07591     | 2.07591      |
| Coro7    | Coro7-008    | 0.0109629   | 2.37932     | 2.37932      |
| Cox6a2   | Cox6a2-001   | 0.0191001   | 1.61964     | 1.61964      |
| Cox6b2   | Cox6b2-007   | 0.0209198   | 2.68816     | 2.68816      |
| Cp       | Cp-011       | 0.0385566   | 6.91683     | 6.91683      |
| Cpd      | Cpd-001      | 0.0379876   | 0.907117    | -1.10239     |
| Cpeb4    | Cpeb4-002    | 0.0448058   | 0.734524    | -1.36143     |
| Cpq      | Cpq-201      | 0.0462752   | 1.69626     | 1.69626      |
| Cpsf4    | Cpsf4-005    | 0.0254087   | 2.54221     | 2.54221      |
| Cpt1a    | Cpt1a-201    | 0.00728221  | 1.44096     | 1.44096      |
| Cpt2     | Cpt2-006     | 0.0265487   | 4.26657     | 4.26657      |
| Cramp1l  | Cramp1l-201  | 0.0141236   | 1.17543     | 1.17543      |

|            |                |            |             |              |
|------------|----------------|------------|-------------|--------------|
| Creb1      | Creb1-010      | 0.03405    | 2.55332     | 2.55332      |
| Creb3      | Creb3-006      | 0.0488228  | 0.378103    | -2.64478     |
| Creb5      | Creb5-010      | 0.00163006 | 0.611457    | -1.63544     |
| Crebzf     | Crebzf-004     | 0.0196505  | 0.764517    | -1.30801     |
| Crem       | Crem-029       | 0.0141574  | 0.0162237   | -61.6382     |
| Crem       | Crem-201       | 0.0497828  | 0.0551316   | -18.1384     |
| Crip2      | Crip2-001      | 0.0340182  | 1.22825     | 1.22825      |
| Crlf3      | Crlf3-003      | 0.041083   | 2.7887      | 2.7887       |
| Crls1      | Crls1-003      | 0.0328871  | 0.577554    | -1.73144     |
| Crmp1      | Crmp1-001      | 0.0421864  | 0.586987    | -1.70362     |
| Cry1       | Cry1-201       | 0.0099329  | 1.23599     | 1.23599      |
| Cryab      | Cryab-201      | 0.0270722  | 1.19347     | 1.19347      |
| Cryba1     | Cryba1-001     | 0.0421076  | 8.97312e-05 | -11144.4     |
| Crybg3     | Crybg3-001     | 0.0257388  | 1.60163     | 1.60163      |
| Cse1l      | Cse1l-004      | 0.00383099 | 1.73498e-06 | -576377      |
| Csf1       | Csf1-002       | 0.00369128 | 3.97907     | 3.97907      |
| Csgalnact2 | Csgalnact2-001 | 0.0246508  | 0.82995     | -1.20489     |
| Csnk1a1    | Csnk1a1-002    | 0.0136582  | 0.707243    | -1.41394     |
| Csnk1a1    | Csnk1a1-005    | 0.00767617 | 1.29426     | 1.29426      |
| Csnk1d     | Csnk1d-002     | 0.00959131 | 0.892837    | -1.12003     |
| Csnk1d     | Csnk1d-001     | 0.00256366 | 1.38768     | 1.38768      |
| Csnk1g1    | Csnk1g1-014    | 0.00347523 | 0.199089    | -5.02288     |
| Csnk2b     | Csnk2b-007     | 0.0353588  | 3.1834e-07  | -3.14129e+06 |
| Csnk2b     | Csnk2b-006     | 0.00732963 | 3.35812     | 3.35812      |
| Cspp1      | Cspp1-003      | 0.0490073  | 0.157983    | -6.32979     |
| Cspp1      | Cspp1-006      | 0.0400211  | 1.8986      | 1.8986       |
| Csrnp3     | Csrnp3-005     | 0.00943947 | 0.310176    | -3.22397     |
| Ctage5     | Ctage5-006     | 0.0335523  | 0.00657802  | -152.021     |
| Ctage5     | Ctage5-002     | 0.00244002 | 0.53778     | -1.8595      |
| Ctbp1      | Ctbp1-009      | 0.0254316  | 9.01943     | 9.01943      |
| Ctbp2      | Ctbp2-003      | 0.0463065  | 6.17943     | 6.17943      |
| Ctc1       | Ctc1-004       | 0.0149538  | 3.70611     | 3.70611      |
| Ctdsp1     | Ctdsp1-002     | 0.031711   | 0.263527    | -3.79468     |
| Ctdspl     | Ctdspl-001     | 0.00847504 | 1.17605     | 1.17605      |
| Ctnnal1    | Ctnnal1-001    | 0.0110427  | 1.60549     | 1.60549      |
| Ctnnbip1   | Ctnnbip1-002   | 0.014312   | 0.132694    | -7.53614     |
| Cts8       | Cts8-201       | 0.0217232  | 0.448203    | -2.23113     |
| Ctsc       | Ctsc-002       | 0.017125   | 0.865405    | -1.15553     |
| Ctsk       | Ctsk-001       | 0.0394554  | 1.35159     | 1.35159      |
| Ctso       | Ctso-002       | 0.031069   | 0.572189    | -1.74767     |
| Ctu2       | Ctu2-002       | 0.0234362  | 10.3934     | 10.3934      |
| Cul3       | Cul3-002       | 0.00617805 | 0.8929      | -1.11995     |
| Cul9       | Cul9-008       | 0.0351051  | 0.546594    | -1.82951     |

|               |                   |            |             |          |
|---------------|-------------------|------------|-------------|----------|
| Cutal         | Cutal-002         | 0.00912947 | 31.003      | 31.003   |
| Cutal         | Cutal-201         | 0.0241514  | 31.003      | 31.003   |
| Cux1          | Cux1-003          | 0.00126746 | 0.00385152  | -259.637 |
| Cux1          | Cux1-004          | 0.0318584  | 1.58926     | 1.58926  |
| Cwc22         | Cwc22-001         | 0.0148369  | 0.226846    | -4.40827 |
| Cwh43         | Cwh43-002         | 0.0390555  | 0.24272     | -4.11997 |
| Cxcl11        | Cxcl11-201        | 0.0373611  | 2.7189      | 2.7189   |
| Cxcr4         | Cxcr4-002         | 0.024768   | 1.96719     | 1.96719  |
| Cxx1a         | Cxx1a-001         | 0.0395611  | 1.1258      | 1.1258   |
| Cyb561        | Cyb561-002        | 0.00968351 | 2.05991     | 2.05991  |
| Cyb561        | Cyb561-001        | 0.00381136 | 1.55926     | 1.55926  |
| Cyb5d2        | Cyb5d2-001        | 0.00250488 | 0.733297    | -1.3637  |
| Cyfip1        | Cyfip1-011        | 0.0393028  | 0.351208    | -2.84731 |
| Cyfip1        | Cyfip1-004        | 0.0167181  | 0.757172    | -1.3207  |
| Cyfip2        | Cyfip2-201        | 0.0133293  | 0.891951    | -1.12114 |
| Cyp27a1       | Cyp27a1-001       | 0.0398253  | 1.4815      | 1.4815   |
| Cyp2j13       | Cyp2j13-201       | 0.013769   | 1.77909     | 1.77909  |
| Cyp4b1        | Cyp4b1-003        | 0.0316367  | 0.112099    | -8.92066 |
| Cyp4v3        | Cyp4v3-001        | 0.0446426  | 1.1862      | 1.1862   |
| Cyp4x1os      | Cyp4x1os-001      | 0.023916   | 0.472903    | -2.1146  |
| Cyp7b1        | Cyp7b1-001        | 0.0261627  | 0.797631    | -1.25371 |
| Cysltr1       | Cysltr1-201       | 0.0165385  | 35.0438     | 35.0438  |
| Cyth2         | Cyth2-004         | 0.0485751  | 4.53972     | 4.53972  |
| D030055H07Rik | D030055H07Rik-003 | 0.00417256 | 8.02594     | 8.02594  |
| D030055H07Rik | D030055H07Rik-001 | 0.0321094  | 2648.14     | 2648.14  |
| D130040H23Rik | D130040H23Rik-201 | 0.0370154  | 0.708855    | -1.41073 |
| D17H6S53E     | D17H6S53E-001     | 0.0143105  | 1.24539     | 1.24539  |
| D1Ertd622e    | D1Ertd622e-001    | 0.0491008  | 1.41174     | 1.41174  |
| D230025D16Rik | D230025D16Rik-005 | 0.021624   | 6.53831     | 6.53831  |
| D630024D03Rik | D630024D03Rik-002 | 0.0318987  | 15.8462     | 15.8462  |
| D630030B08Rik | D630030B08Rik-001 | 0.0179172  | 0.255248    | -3.91776 |
| D6Wsu163e     | D6Wsu163e-001     | 0.0138587  | 0.880544    | -1.13566 |
| D8Ertd738e    | D8Ertd738e-201    | 0.0378484  | 1.09314     | 1.09314  |
| D930015E06Rik | D930015E06Rik-001 | 0.0465603  | 0.757651    | -1.31987 |
| Daam2         | Daam2-201         | 0.0226368  | 1.09535     | 1.09535  |
| Dab2ip        | Dab2ip-003        | 0.0448033  | 0.726932    | -1.37565 |
| Dab2ip        | Dab2ip-010        | 0.0202086  | 0.472816    | -2.11499 |
| Dab2ip        | Dab2ip-001        | 0.00080954 | 1.51443     | 1.51443  |
| Dab2ip        | Dab2ip-009        | 0.0158165  | 3.97893     | 3.97893  |
| Dalrd3        | Dalrd3-006        | 0.0159211  | 0.000127845 | -7821.95 |
| Dars2         | Dars2-004         | 0.0410229  | 0.649369    | -1.53996 |
| Dazap1        | Dazap1-001        | 0.0279719  | 0.671152    | -1.48998 |
| Dbndd2        | Dbndd2-006        | 0.0161199  | 1.63125     | 1.63125  |

|          |              |             |             |              |
|----------|--------------|-------------|-------------|--------------|
| Dbr1     | Dbr1-005     | 0.0326534   | 0.594844    | -1.68111     |
| Dcaf12   | Dcaf12-001   | 0.0424434   | 1.0968      | 1.0968       |
| Dcaf12l2 | Dcaf12l2-001 | 0.00991465  | 0.612711    | -1.63209     |
| Dcbld1   | Dcbld1-003   | 0.0230124   | 5.45169     | 5.45169      |
| Dcbld2   | Dcbld2-007   | 0.0101871   | 2.40367     | 2.40367      |
| Dcdc2b   | Dcdc2b-201   | 0.039243    | 2.59998     | 2.59998      |
| Dclre1a  | Dclre1a-001  | 0.0194299   | 0.719341    | -1.39016     |
| Dclre1b  | Dclre1b-007  | 0.0489337   | 1.90393     | 1.90393      |
| Dclre1c  | Dclre1c-003  | 0.0151323   | 0.793093    | -1.26089     |
| Dctd     | Dctd-004     | 0.042777    | 0.248226    | -4.02859     |
| Dctn6    | Dctn6-004    | 0.00752188  | 0.718358    | -1.39206     |
| Dctn6    | Dctn6-003    | 0.00115286  | 3.40686     | 3.40686      |
| Dctn6    | Dctn6-008    | 0.000145687 | 2.33701     | 2.33701      |
| Dcun1d4  | Dcun1d4-010  | 0.0337894   | 2.18855e-09 | -4.56924e+08 |
| Dda1     | Dda1-001     | 0.0271458   | 0.715107    | -1.39839     |
| Dda1     | Dda1-003     | 0.0400152   | 2.67748     | 2.67748      |
| Dda1     | Dda1-002     | 0.0268076   | 1.80416     | 1.80416      |
| Ddah1    | Ddah1-001    | 0.0461995   | 1.14836     | 1.14836      |
| Ddhd1    | Ddhd1-001    | 0.0469764   | 0.206673    | -4.83855     |
| Ddhd2    | Ddhd2-201    | 0.0111878   | 0.909787    | -1.09916     |
| Ddx39b   | Ddx39b-002   | 0.0467767   | 0.202164    | -4.94648     |
| Ddx47    | Ddx47-001    | 0.0492758   | 1.08849     | 1.08849      |
| Dedd     | Dedd-004     | 0.0097413   | 0.308307    | -3.24352     |
| Dek      | Dek-003      | 0.014227    | 2.32046     | 2.32046      |
| Dennd1b  | Dennd1b-007  | 0.00600362  | 0.297552    | -3.36076     |
| Dennd1b  | Dennd1b-001  | 0.036182    | 0.698925    | -1.43077     |
| Dennd4c  | Dennd4c-001  | 0.0183207   | 1.12906     | 1.12906      |
| Desi1    | Desi1-002    | 0.0197954   | 2.15568     | 2.15568      |
| Desi2    | Desi2-001    | 0.00922246  | 1.25283     | 1.25283      |
| Det1     | Det1-001     | 0.047223    | 1.29433     | 1.29433      |
| Dffb     | Dffb-001     | 0.0288139   | 0.802211    | -1.24655     |
| Dgcr8    | Dgcr8-002    | 0.0401742   | 0.400613    | -2.49617     |
| Dgcr8    | Dgcr8-001    | 0.0345003   | 1.21803     | 1.21803      |
| Dgka     | Dgka-201     | 0.0434242   | 0.885429    | -1.1294      |
| Dgke     | Dgke-001     | 9.74064e-05 | 0.68501     | -1.45983     |
| Dgke     | Dgke-201     | 0.000796268 | 1.47055     | 1.47055      |
| Dgkg     | Dgkg-004     | 0.0175728   | 0.478391    | -2.09034     |
| Dhodh    | Dhodh-009    | 0.0156933   | 0.153614    | -6.50984     |
| Dhodh    | Dhodh-008    | 0.000195041 | 14.9927     | 14.9927      |
| Dhps     | Dhps-007     | 0.0418752   | 0.149114    | -6.70627     |
| Dhrs3    | Dhrs3-003    | 0.0221243   | 2.13125     | 2.13125      |
| Dhrs7b   | Dhrs7b-201   | 0.048448    | 1.15817     | 1.15817      |
| Dhx16    | Dhx16-008    | 0.0325198   | 0.00417453  | -239.548     |

|          |              |            |             |              |
|----------|--------------|------------|-------------|--------------|
| Dhx34    | Dhx34-005    | 0.0124521  | 5597.2      | 5597.2       |
| Dhx35    | Dhx35-009    | 0.0498025  | 0.244556    | -4.08905     |
| Dhx35    | Dhx35-004    | 0.0423046  | 0.630467    | -1.58613     |
| Diexf    | Diexf-002    | 0.0378631  | 1.49232     | 1.49232      |
| Diras2   | Diras2-201   | 0.0372116  | 0.900618    | -1.11035     |
| Dkc1     | Dkc1-001     | 0.0425103  | 1.0985      | 1.0985       |
| Dlat     | Dlat-001     | 0.0126793  | 0.885927    | -1.12876     |
| Dleu2    | Dleu2-015    | 0.0450802  | 2.31385     | 2.31385      |
| Dlg2     | Dlg2-002     | 0.0230155  | 0.794972    | -1.25791     |
| Dlgap1   | Dlgap1-003   | 0.0165585  | 0.594097    | -1.68323     |
| Dlgap1   | Dlgap1-006   | 0.0137489  | 0.86545     | -1.15547     |
| Dlgap2   | Dlgap2-008   | 0.0190268  | 2.05031     | 2.05031      |
| Dlgap4   | Dlgap4-006   | 0.00484641 | 66.8002     | 66.8002      |
| Dlx1as   | Dlx1as-004   | 0.0362577  | 0.814894    | -1.22715     |
| Dmap1    | Dmap1-006    | 0.0140587  | 5.57991     | 5.57991      |
| Dmd      | Dmd-003      | 0.0299936  | 0.84191     | -1.18778     |
| Dmd      | Dmd-007      | 0.0331106  | 0.419287    | -2.385       |
| Dmpk     | Dmpk-011     | 0.035694   | 8.80332e-05 | -11359.3     |
| Dmtf1    | Dmtf1-001    | 0.0019766  | 1.52408     | 1.52408      |
| Dmxl2    | Dmxl2-004    | 0.00097312 | 0.854193    | -1.1707      |
| Dmxl2    | Dmxl2-008    | 0.00528506 | 2.27406     | 2.27406      |
| Dnah8    | Dnah8-201    | 0.00180231 | 0.617894    | -1.6184      |
| Dnaja4   | Dnaja4-003   | 0.038219   | 0.154954    | -6.45353     |
| Dnajib1  | Dnajib1-201  | 0.0398075  | 1.13947     | 1.13947      |
| Dnajib11 | Dnajib11-001 | 0.0395599  | 1.13794     | 1.13794      |
| Dnajib5  | Dnajib5-001  | 0.0182885  | 0.456328    | -2.19141     |
| Dnajib5  | Dnajib5-201  | 0.0273362  | 1.23051     | 1.23051      |
| Dnajib5  | Dnajib5-006  | 0.0299375  | 1.47466     | 1.47466      |
| Dnajc1   | Dnajc1-005   | 0.0255863  | 0.236707    | -4.22463     |
| Dnajc10  | Dnajc10-004  | 0.034662   | 0.670251    | -1.49198     |
| Dnajc13  | Dnajc13-010  | 0.00935994 | 3.13686     | 3.13686      |
| Dnajc17  | Dnajc17-002  | 0.0319501  | 0.00710147  | -140.816     |
| Dnajc2   | Dnajc2-005   | 0.00230427 | 2.17149e-07 | -4.60513e+06 |
| Dnajc25  | Dnajc25-002  | 0.0264313  | 1.3296      | 1.3296       |
| Dnajc28  | Dnajc28-003  | 0.0411616  | 151.599     | 151.599      |
| Dnajc5   | Dnajc5-004   | 0.011093   | 0.0878971   | -11.3769     |
| Dnajc7   | Dnajc7-007   | 0.0149944  | 1.42551     | 1.42551      |
| Dnajc7   | Dnajc7-004   | 0.0365334  | 1.42898     | 1.42898      |
| Dnajc7   | Dnajc7-005   | 0.0328702  | 25.614      | 25.614       |
| Dnajc8   | Dnajc8-009   | 0.0131291  | 0.126448    | -7.9084      |
| Dnajc8   | Dnajc8-003   | 0.0286573  | 0.337473    | -2.9632      |
| Dnajc8   | Dnajc8-002   | 0.0444214  | 1.45236     | 1.45236      |
| Dnase1l2 | Dnase1l2-002 | 0.0337507  | 1.64021     | 1.64021      |

|               |                   |            |             |          |
|---------------|-------------------|------------|-------------|----------|
| Dnase1l3      | Dnase1l3-001      | 0.0218576  | 0.532573    | -1.87768 |
| Dnm1          | Dnm1-005          | 0.00338066 | 0.865329    | -1.15563 |
| Dnm1          | Dnm1-004          | 0.0319729  | 0.755888    | -1.32295 |
| Dnm1          | Dnm1-003          | 0.0190944  | 0.803327    | -1.24482 |
| Dnm1          | Dnm1-008          | 0.0371629  | 2.66794     | 2.66794  |
| Dnm2          | Dnm2-009          | 0.0347913  | 5.89318     | 5.89318  |
| Dnm2          | Dnm2-005          | 0.0405331  | 1.62424     | 1.62424  |
| Dnm3          | Dnm3-004          | 0.00105503 | 1.52384     | 1.52384  |
| Dnpep         | Dnpep-008         | 0.0110679  | 0.00628997  | -158.983 |
| Dnpep         | Dnpep-003         | 0.00219478 | 2.13095     | 2.13095  |
| Doc2g         | Doc2g-001         | 0.0227121  | 1.57619     | 1.57619  |
| Dock4         | Dock4-201         | 0.0157992  | 0.867837    | -1.15229 |
| Dock5         | Dock5-201         | 0.0262194  | 1.26093     | 1.26093  |
| Dopey1        | Dopey1-011        | 0.0343927  | 0.0458539   | -21.8084 |
| Dopey1        | Dopey1-016        | 0.0168138  | 1.73388     | 1.73388  |
| Dpf2          | Dpf2-003          | 0.00873073 | 10.1676     | 10.1676  |
| Dpf2          | Dpf2-005          | 0.0430667  | 1.58414     | 1.58414  |
| Dph7          | Dph7-003          | 0.036458   | 0.632887    | -1.58006 |
| Dpm1          | Dpm1-005          | 0.00781632 | 7.51851e-06 | -133005  |
| Dpp9          | Dpp9-201          | 0.0330445  | 0.913615    | -1.09455 |
| Dr1           | Dr1-002           | 0.0217058  | 0.178424    | -5.60462 |
| Drc1          | Drc1-003          | 0.0393157  | 16.2404     | 16.2404  |
| Drg2          | Drg2-005          | 0.0496813  | 1.36204     | 1.36204  |
| Dscaml1       | Dscaml1-201       | 0.0462606  | 0.867888    | -1.15222 |
| Dscr3         | Dscr3-004         | 0.0208249  | 0.17043     | -5.8675  |
| Dsel          | Dsel-004          | 0.0348504  | 1915.29     | 1915.29  |
| Dst           | Dst-017           | 0.0393936  | 0.180921    | -5.52729 |
| Dtl           | Dtl-001           | 0.0297775  | 1.68941     | 1.68941  |
| Dtnb          | Dtnb-025          | 0.0221746  | 0.66517     | -1.50337 |
| Dusp15        | Dusp15-001        | 0.0313897  | 1.38784     | 1.38784  |
| Dusp16        | Dusp16-002        | 0.0275528  | 0.0802755   | -12.4571 |
| Dusp16        | Dusp16-005        | 0.0407153  | 1.97011     | 1.97011  |
| Dusp23        | Dusp23-001        | 0.029358   | 0.769687    | -1.29923 |
| Dvl2          | Dvl2-004          | 0.0001217  | 1.85256     | 1.85256  |
| Dvl2          | Dvl2-003          | 0.0417704  | 4.59659     | 4.59659  |
| Dync1h1       | Dync1h1-008       | 0.0193585  | 0.384388    | -2.60154 |
| Dyrk1b        | Dyrk1b-001        | 0.0148843  | 1.3647      | 1.3647   |
| Dysf          | Dysf-016          | 0.0363276  | 3.68412     | 3.68412  |
| E030013I19Rik | E030013I19Rik-002 | 0.0237103  | 0.701919    | -1.42466 |
| E130111B04Rik | E130111B04Rik-001 | 0.00172892 | 0.0752784   | -13.284  |
| E130114P18Rik | E130114P18Rik-006 | 0.0177183  | 6.99621     | 6.99621  |
| E130311K13Rik | E130311K13Rik-003 | 0.00509437 | 5.47138     | 5.47138  |
| E230001N04Rik | E230001N04Rik-001 | 0.021678   | 0.554934    | -1.80202 |



|               |                   |            |             |             |
|---------------|-------------------|------------|-------------|-------------|
| E2f6          | E2f6-201          | 0.0484135  | 1.11521     | 1.11521     |
| E330009J07Rik | E330009J07Rik-001 | 0.0290313  | 1.11116     | 1.11116     |
| E4f1          | E4f1-201          | 0.0148203  | 1.15092     | 1.15092     |
| Eaf1          | Eaf1-201          | 0.00223572 | 1.18448     | 1.18448     |
| Eapp          | Eapp-003          | 0.0136738  | 6332.65     | 6332.65     |
| Ebag9         | Ebag9-201         | 0.00506827 | 0.820598    | -1.21862    |
| Echdc1        | Echdc1-002        | 0.0248805  | 1.3062      | 1.3062      |
| Echdc2        | Echdc2-002        | 0.00839535 | 0.291751    | -3.42758    |
| Eci1          | Eci1-201          | 0.00741413 | 1.35054     | 1.35054     |
| Ecscr         | Ecscr-005         | 0.0385416  | 82.713      | 82.713      |
| Ect2          | Ect2-012          | 0.0350797  | 1.75799e+10 | 1.75799e+10 |
| Eef1d         | Eef1d-015         | 0.032391   | 1.77537     | 1.77537     |
| Eepd1         | Eepd1-001         | 0.0192053  | 1.14238     | 1.14238     |
| Efcab3        | Efcab3-003        | 0.0454163  | 0.235788    | -4.2411     |
| Efhc2         | Efhc2-001         | 0.0468415  | 1.48428     | 1.48428     |
| Efna1         | Efna1-001         | 0.0191108  | 0.422128    | -2.36895    |
| Efna1         | Efna1-003         | 0.0247566  | 8.39031     | 8.39031     |
| Efr3a         | Efr3a-011         | 0.0122167  | 0.0852054   | -11.7364    |
| Egfl7         | Egfl7-019         | 0.0296706  | 0.51219     | -1.9524     |
| Egfr          | Egfr-002          | 0.0401771  | 0.198071    | -5.04869    |
| Egr2          | Egr2-001          | 0.0202495  | 2.89398     | 2.89398     |
| Ehd1          | Ehd1-004          | 0.0269062  | 0.122064    | -8.19243    |
| Ehd2          | Ehd2-002          | 0.0191139  | 8.30697     | 8.30697     |
| Ehd4          | Ehd4-004          | 0.0307787  | 6.68831     | 6.68831     |
| Ehmt1         | Ehmt1-003         | 0.0444853  | 2.73788     | 2.73788     |
| Ehmt2         | Ehmt2-005         | 0.0152183  | 0.177338    | -5.63895    |
| Ei24          | Ei24-007          | 0.0201559  | 2.73657     | 2.73657     |
| Eif1ax        | Eif1ax-001        | 0.0491777  | 0.91883     | -1.08834    |
| Eif2ak3       | Eif2ak3-004       | 0.0475185  | 8.27203e-05 | -12088.9    |
| Eif2b5        | Eif2b5-001        | 0.0380772  | 1.07146     | 1.07146     |
| Eif2d         | Eif2d-005         | 0.0107038  | 2.06519     | 2.06519     |
| Eif2s2        | Eif2s2-001        | 0.0478848  | 1.30194     | 1.30194     |
| Eif3f         | Eif3f-003         | 0.0405265  | 2.39693     | 2.39693     |
| Eif4a2        | Eif4a2-005        | 0.020918   | 1.63877     | 1.63877     |
| Eif4e         | Eif4e-006         | 0.00708464 | 3.20808     | 3.20808     |
| Eif4enif1     | Eif4enif1-010     | 0.0197709  | 18.8116     | 18.8116     |
| Eif4g1        | Eif4g1-014        | 0.0475669  | 5.16105     | 5.16105     |
| Eif4g1        | Eif4g1-004        | 0.0391857  | 1.26697     | 1.26697     |
| Eif4g1        | Eif4g1-016        | 0.0444842  | 6.42911     | 6.42911     |
| Eif4g3        | Eif4g3-010        | 0.0106495  | 0.000201003 | -4975.06    |
| Eif5a         | Eif5a-004         | 0.0166627  | 0.659117    | -1.51718    |
| Eif5a         | Eif5a-007         | 0.0436016  | 0.489317    | -2.04367    |
| Elac2         | Elac2-004         | 0.0249057  | 0.000166737 | -5997.46    |

|         |             |             |             |              |
|---------|-------------|-------------|-------------|--------------|
| Elf2    | Elf2-001    | 0.0327232   | 0.582542    | -1.71662     |
| Elk4    | Elk4-002    | 0.0232902   | 1.17711     | 1.17711      |
| Ell     | Ell-201     | 0.0345165   | 1.13094     | 1.13094      |
| Elmo2   | Elmo2-002   | 0.0115947   | 0.632262    | -1.58162     |
| Elmo3   | Elmo3-201   | 0.0265661   | 1.56292     | 1.56292      |
| Elmod3  | Elmod3-004  | 0.0140914   | 0.0309465   | -32.3139     |
| Elovl2  | Elovl2-001  | 0.0440333   | 0.870362    | -1.14895     |
| Elp3    | Elp3-201    | 0.00152493  | 0.910027    | -1.09887     |
| Emc10   | Emc10-004   | 0.00153042  | 0.285912    | -3.49758     |
| Eml6    | Eml6-002    | 0.0316406   | 0.212941    | -4.69614     |
| Emp2    | Emp2-001    | 0.0155695   | 1.29937     | 1.29937      |
| Enah    | Enah-003    | 0.0156543   | 0.92702     | -1.07873     |
| Enah    | Enah-009    | 0.0325546   | 1.50952     | 1.50952      |
| Enah    | Enah-011    | 0.000715959 | 4.24163     | 4.24163      |
| Eng     | Eng-006     | 0.0224886   | 7.02276     | 7.02276      |
| Eng     | Eng-004     | 0.0468351   | 6.39902     | 6.39902      |
| Eno4    | Eno4-201    | 0.00446153  | 5.65359     | 5.65359      |
| Enox1   | Enox1-201   | 0.0234597   | 0.86451     | -1.15672     |
| Enox2   | Enox2-002   | 0.000193195 | 0.452426    | -2.2103      |
| Enthd2  | Enthd2-002  | 0.0233802   | 1.65105     | 1.65105      |
| Entpd3  | Entpd3-002  | 0.00110061  | 3.36959e-08 | -2.96772e+07 |
| Entpd5  | Entpd5-005  | 0.0165959   | 2.73586     | 2.73586      |
| Eogt    | Eogt-001    | 0.0309555   | 1.17119     | 1.17119      |
| Epb41   | Epb41-202   | 0.0137857   | 0.345737    | -2.89237     |
| Epb41   | Epb41-001   | 0.00935649  | 2.50077     | 2.50077      |
| Epb41l1 | Epb41l1-012 | 0.042476    | 0.383793    | -2.60557     |
| Epb41l1 | Epb41l1-010 | 0.0234866   | 0.472708    | -2.11547     |
| Epb41l1 | Epb41l1-005 | 0.0237623   | 1.0961      | 1.0961       |
| Epb41l1 | Epb41l1-007 | 0.0244739   | 1.07114     | 1.07114      |
| Epb41l1 | Epb41l1-002 | 0.0444788   | 1.81775     | 1.81775      |
| Epc2    | Epc2-001    | 0.0129463   | 0.901315    | -1.10949     |
| Epha4   | Epha4-201   | 0.0405863   | 0.874181    | -1.14393     |
| Epha5   | Epha5-003   | 0.0359117   | 0.740909    | -1.34969     |
| Ephb1   | Ephb1-001   | 0.0215724   | 1.22202     | 1.22202      |
| Ephx1   | Ephx1-001   | 0.043191    | 1.40187     | 1.40187      |
| Epn1    | Epn1-006    | 0.00481224  | 0.169822    | -5.88851     |
| Epn3    | Epn3-001    | 0.0277191   | 4.98976     | 4.98976      |
| Eps8l2  | Eps8l2-007  | 0.0080369   | 0.236756    | -4.22375     |
| Eps8l3  | Eps8l3-001  | 0.00727662  | 0.1967      | -5.08388     |
| Eral1   | Eral1-001   | 0.0142954   | 0.698786    | -1.43105     |
| Eral1   | Eral1-002   | 0.000304643 | 2.02983     | 2.02983      |
| Erb2    | Erb2-003    | 0.0247864   | 0.00113587  | -880.382     |
| Erb2ip  | Erb2ip-201  | 0.0387419   | 1.22158     | 1.22158      |

|               |                   |             |             |             |
|---------------|-------------------|-------------|-------------|-------------|
| Ercc4         | Ercc4-003         | 0.0485119   | 0.136636    | -7.31872    |
| Ercc4         | Ercc4-005         | 0.0405428   | 2.24328     | 2.24328     |
| Ercc6l        | Ercc6l-001        | 0.0414393   | 3.48609     | 3.48609     |
| Ergic2        | Ergic2-008        | 0.0221572   | 0.403322    | -2.47941    |
| Erich4        | Erich4-001        | 0.0273653   | 0.127021    | -7.87272    |
| Ermard        | Ermard-201        | 0.000198515 | 0.740349    | -1.35072    |
| Esd           | Esd-007           | 0.00450774  | 0.158777    | -6.29813    |
| Esm1          | Esm1-001          | 0.00386728  | 9.82248     | 9.82248     |
| Espn          | Espn-001          | 0.044088    | 3.35701     | 3.35701     |
| Esrrg         | Esrrg-004         | 0.0307995   | 8.15622e+08 | 8.15622e+08 |
| Etl4          | Etl4-007          | 0.0117612   | 1.39748     | 1.39748     |
| Etl4          | Etl4-006          | 0.0229476   | 1.53306     | 1.53306     |
| Etnppl        | Etnppl-001        | 0.0478342   | 1.46881     | 1.46881     |
| Ets1          | Ets1-007          | 0.0342168   | 0.392637    | -2.54688    |
| Ets2          | Ets2-004          | 0.00717061  | 0.109265    | -9.15206    |
| Etv1          | Etv1-002          | 0.0481266   | 0.621046    | -1.61019    |
| Etv3          | Etv3-004          | 0.0285244   | 0.302533    | -3.30542    |
| Evc2          | Evc2-001          | 0.0430867   | 0.835107    | -1.19745    |
| Exoc5         | Exoc5-002         | 0.0310539   | 1.80198     | 1.80198     |
| Exoc6         | Exoc6-201         | 0.0447028   | 0.883476    | -1.13189    |
| Exog          | Exog-202          | 0.022424    | 1.27709     | 1.27709     |
| Exosc10       | Exosc10-001       | 0.0335335   | 0.776172    | -1.28837    |
| Exosc2        | Exosc2-001        | 0.005823    | 1.11651     | 1.11651     |
| Exosc4        | Exosc4-002        | 0.0477851   | 0.00697344  | -143.401    |
| Eya2          | Eya2-003          | 0.0462916   | 79677.8     | 79677.8     |
| Ezr           | Ezr-001           | 0.0430672   | 1.26815     | 1.26815     |
| F730043M19Rik | F730043M19Rik-003 | 0.00349621  | 0.656946    | -1.52219    |
| F8a           | F8a-001           | 0.0417321   | 0.840467    | -1.18981    |
| F9            | F9-001            | 0.0347664   | 0.483603    | -2.06781    |
| Faah          | Faah-001          | 0.0428784   | 0.826002    | -1.21065    |
| Fabp5         | Fabp5-002         | 0.00646055  | 0.668493    | -1.4959     |
| Fabp7         | Fabp7-002         | 0.00633823  | 0.248943    | -4.01698    |
| Fah           | Fah-002           | 0.00721522  | 348596      | 348596      |
| Fam105a       | Fam105a-201       | 0.0349282   | 1.18175     | 1.18175     |
| Fam107b       | Fam107b-003       | 0.017129    | 0.0401192   | -24.9257    |
| Fam107b       | Fam107b-002       | 0.0171292   | 0.040119    | -24.9258    |
| Fam107b       | Fam107b-005       | 0.00172699  | 115.951     | 115.951     |
| Fam110b       | Fam110b-002       | 0.0315255   | 0.660554    | -1.51388    |
| Fam110b       | Fam110b-005       | 0.0460185   | 3.82885     | 3.82885     |
| Fam117a       | Fam117a-001       | 0.0104076   | 1.26357     | 1.26357     |
| Fam118b       | Fam118b-006       | 0.010617    | 0.0119542   | -83.6526    |
| Fam118b       | Fam118b-004       | 0.0490982   | 1.67549     | 1.67549     |
| Fam129a       | Fam129a-002       | 0.0484205   | 0.0585041   | -17.0928    |

|          |              |             |             |             |
|----------|--------------|-------------|-------------|-------------|
| Fam129b  | Fam129b-001  | 0.00547349  | 1.38458     | 1.38458     |
| Fam132a  | Fam132a-003  | 0.00975045  | 4.41088     | 4.41088     |
| Fam132b  | Fam132b-001  | 0.00999656  | 4.32273     | 4.32273     |
| Fam134a  | Fam134a-004  | 0.000990919 | 1.65504     | 1.65504     |
| Fam160a1 | Fam160a1-201 | 0.0126071   | 3.56732     | 3.56732     |
| Fam160a1 | Fam160a1-001 | 0.0126065   | 3.56733     | 3.56733     |
| Fam161a  | Fam161a-002  | 0.00970625  | 2.03756     | 2.03756     |
| Fam171a1 | Fam171a1-003 | 0.0261954   | 1.54106     | 1.54106     |
| Fam171a2 | Fam171a2-002 | 0.01321     | 0.538314    | -1.85765    |
| Fam171b  | Fam171b-001  | 0.00255785  | 0.919261    | -1.08783    |
| Fam175a  | Fam175a-007  | 0.00469487  | 0.339842    | -2.94255    |
| Fam179a  | Fam179a-001  | 0.0400232   | 2.26766     | 2.26766     |
| Fam185a  | Fam185a-001  | 0.0231067   | 0.859972    | -1.16283    |
| Fam188a  | Fam188a-019  | 0.00363467  | 0.588552    | -1.69908    |
| Fam189a2 | Fam189a2-201 | 0.00495785  | 1.46328     | 1.46328     |
| Fam19a4  | Fam19a4-001  | 0.00454508  | 2.95617     | 2.95617     |
| Fam206a  | Fam206a-004  | 0.0454839   | 3.59011e+06 | 3.59011e+06 |
| Fam20b   | Fam20b-002   | 0.0186678   | 0.388498    | -2.57402    |
| Fam234b  | Fam234b-002  | 0.0108992   | 0.359983    | -2.77791    |
| Fam3a    | Fam3a-001    | 0.0308947   | 1.16093     | 1.16093     |
| Fam43b   | Fam43b-001   | 0.0351578   | 1.16785     | 1.16785     |
| Fam46c   | Fam46c-001   | 0.021225    | 1.6547      | 1.6547      |
| Fam47e   | Fam47e-003   | 0.0190737   | 7.43633     | 7.43633     |
| Fam53b   | Fam53b-004   | 0.00788306  | 0.437049    | -2.28807    |
| Fam69a   | Fam69a-003   | 0.0260822   | 3.95804     | 3.95804     |
| Fam69c   | Fam69c-001   | 0.0328676   | 1.32946     | 1.32946     |
| Fam73a   | Fam73a-001   | 0.00653761  | 1.15194     | 1.15194     |
| Fam76b   | Fam76b-001   | 0.0493409   | 1.63108     | 1.63108     |
| Fam83d   | Fam83d-001   | 0.0317469   | 1.74948     | 1.74948     |
| Fam92a   | Fam92a-004   | 0.0459432   | 0.658854    | -1.51779    |
| Fam98c   | Fam98c-006   | 0.0468189   | 5.65298     | 5.65298     |
| Fanca    | Fanca-011    | 0.00645066  | 3.10244     | 3.10244     |
| Fancl    | Fancl-003    | 0.0377642   | 0.672897    | -1.48611    |
| Fap      | Fap-004      | 0.028384    | 3.83585     | 3.83585     |
| Fap      | Fap-008      | 0.0360274   | 11.4891     | 11.4891     |
| Fap      | Fap-002      | 0.014038    | 6.90773     | 6.90773     |
| Fap      | Fap-003      | 0.00904178  | 9.17249     | 9.17249     |
| Far1     | Far1-009     | 0.0182434   | 1.26748     | 1.26748     |
| Far1     | Far1-003     | 0.0296179   | 1.30859     | 1.30859     |
| Far2os2  | Far2os2-001  | 0.00291853  | 0.384814    | -2.59866    |
| Farp2    | Farp2-001    | 0.0369449   | 1.33247     | 1.33247     |
| Fastk    | Fastk-015    | 0.0495841   | 0.286557    | -3.4897     |
| Fastk    | Fastk-004    | 0.04422     | 1.32856     | 1.32856     |

|          |              |             |             |             |
|----------|--------------|-------------|-------------|-------------|
| Fat4     | Fat4-001     | 0.0130692   | 0.80624     | -1.24033    |
| Fbln5    | Fbln5-201    | 0.0161617   | 2.20259     | 2.20259     |
| Fbxl2    | Fbxl2-003    | 0.01921     | 2.20036     | 2.20036     |
| Fbxl5    | Fbxl5-002    | 0.0456046   | 0.641963    | -1.55772    |
| Fbxo22   | Fbxo22-005   | 0.0282413   | 5.04787     | 5.04787     |
| Fbxo30   | Fbxo30-001   | 0.00716872  | 1.51079     | 1.51079     |
| Fbxo34   | Fbxo34-201   | 0.039316    | 0.622898    | -1.6054     |
| Fbxw15   | Fbxw15-001   | 0.042011    | 1.93559     | 1.93559     |
| Fbxw4    | Fbxw4-009    | 0.0407223   | 17.9976     | 17.9976     |
| Fbxw7    | Fbxw7-003    | 0.0179021   | 0.655316    | -1.52598    |
| Fbxw9    | Fbxw9-009    | 0.00570217  | 147.394     | 147.394     |
| Fcgbp    | Fcgbp-002    | 0.0407547   | 0.325662    | -3.07067    |
| Fcho1    | Fcho1-009    | 0.000312657 | 1.9724      | 1.9724      |
| Fcho2    | Fcho2-202    | 0.00620989  | 0.561428    | -1.78117    |
| Fcho2    | Fcho2-201    | 0.0464685   | 1.1558      | 1.1558      |
| Fchsd1   | Fchsd1-006   | 0.0480816   | 7.15275e+06 | 7.15275e+06 |
| Fcrls    | Fcrls-001    | 0.0233647   | 0.646357    | -1.54713    |
| Fdps     | Fdps-007     | 0.0171341   | 0.399328    | -2.50421    |
| Fer      | Fer-202      | 0.00910055  | 0.166785    | -5.99574    |
| Fgd1     | Fgd1-003     | 0.0468739   | 0.147784    | -6.76662    |
| Fgd2     | Fgd2-004     | 0.0317623   | 0.604522    | -1.6542     |
| Fgd4     | Fgd4-003     | 4.42213e-05 | 3.27036e-05 | -30577.6    |
| Fgd4     | Fgd4-009     | 0.0297669   | 0.291905    | -3.42578    |
| Fgf23    | Fgf23-001    | 0.0369284   | 0.544917    | -1.83514    |
| Fgfr1op2 | Fgfr1op2-006 | 0.00605343  | 4.69322     | 4.69322     |
| Fgfr2    | Fgfr2-017    | 0.0403845   | 5.72775     | 5.72775     |
| Fgfr2    | Fgfr2-012    | 0.0460892   | 7.30549     | 7.30549     |
| Fgfr3    | Fgfr3-006    | 0.0376248   | 0.417593    | -2.39468    |
| Fhad1    | Fhad1-006    | 0.00476687  | 0.109516    | -9.13105    |
| Fhad1    | Fhad1-002    | 0.0162096   | 2.64993     | 2.64993     |
| Fhad1os2 | Fhad1os2-001 | 0.0498874   | 2.43443     | 2.43443     |
| Fhit     | Fhit-001     | 0.00980592  | 18.2854     | 18.2854     |
| Fis1     | Fis1-005     | 0.00891213  | 2.77544     | 2.77544     |
| Fkbp1a   | Fkbp1a-002   | 0.00619739  | 0.7068      | -1.41483    |
| Fkbp2    | Fkbp2-202    | 0.0101999   | 1.40097     | 1.40097     |
| Fkbp8    | Fkbp8-007    | 0.0195861   | 0.51085     | -1.95752    |
| Fkrp     | Fkrp-001     | 0.0385958   | 0.908503    | -1.10071    |
| Flna     | Flna-006     | 0.0440524   | 1.562       | 1.562       |
| Flnc     | Flnc-001     | 0.0311007   | 1.88907     | 1.88907     |
| Flot1    | Flot1-007    | 0.0323586   | 0.12487     | -8.0083     |
| Flywch2  | Flywch2-002  | 0.0238342   | 0.0115397   | -86.6576    |
| Fmn2     | Fmn2-001     | 0.02973     | 0.908026    | -1.10129    |
| Fmnl3    | Fmnl3-002    | 0.0400937   | 0.263136    | -3.80032    |

|         |             |             |             |              |
|---------|-------------|-------------|-------------|--------------|
| Fnbp1l  | Fnbp1l-001  | 0.0151879   | 1.76076     | 1.76076      |
| Fndc8   | Fndc8-001   | 0.0441634   | 1.6152      | 1.6152       |
| Folr1   | Folr1-010   | 0.0250065   | 1.51919e+06 | 1.51919e+06  |
| Folr1   | Folr1-009   | 0.0408829   | 48.2525     | 48.2525      |
| Fopnl   | Fopnl-002   | 0.0242467   | 0.55816     | -1.7916      |
| Foxm1   | Foxm1-003   | 0.0480594   | 0.000221404 | -4516.64     |
| Foxn2   | Foxn2-003   | 0.00248479  | 6.85215     | 6.85215      |
| Foxn3   | Foxn3-008   | 0.00358824  | 4.9982      | 4.9982       |
| Foxo3   | Foxo3-001   | 0.0498241   | 1.14929     | 1.14929      |
| Foxo4   | Foxo4-001   | 0.00556859  | 1.16553     | 1.16553      |
| Foxp1   | Foxp1-024   | 6.87427e-05 | 0.00182291  | -548.572     |
| Foxred1 | Foxred1-002 | 0.0384014   | 1.76771     | 1.76771      |
| Fpgt    | Fpgt-004    | 0.0211283   | 0.411764    | -2.42857     |
| Fpgt    | Fpgt-001    | 0.00772851  | 0.852542    | -1.17296     |
| Frat1   | Frat1-201   | 0.0497739   | 0.707239    | -1.41395     |
| Frem1   | Frem1-201   | 0.00791928  | 4.76253     | 4.76253      |
| Frk     | Frk-201     | 0.0445553   | 2.6283      | 2.6283       |
| Frmd3   | Frmd3-003   | 0.0105663   | 0.574192    | -1.74158     |
| Frmd4a  | Frmd4a-003  | 0.0233961   | 0.271775    | -3.67951     |
| Frmd4a  | Frmd4a-006  | 0.0466618   | 0.236219    | -4.23336     |
| Frmd4b  | Frmd4b-008  | 0.00965974  | 2.49676     | 2.49676      |
| Frmd5   | Frmd5-006   | 0.0183703   | 1.77966     | 1.77966      |
| Frmd8   | Frmd8-004   | 0.0440439   | 72.2975     | 72.2975      |
| Frmpd1  | Frmpd1-001  | 0.040472    | 0.261227    | -3.82809     |
| Frs3    | Frs3-003    | 0.0456612   | 3.0698      | 3.0698       |
| Fryl    | Fryl-014    | 0.0336405   | 0.00505043  | -198.003     |
| Fscn1   | Fscn1-001   | 0.0464616   | 1.06507     | 1.06507      |
| Fscn2   | Fscn2-001   | 0.00078317  | 9.50954     | 9.50954      |
| Ftl1    | Ftl1-001    | 0.0407645   | 1.10097     | 1.10097      |
| Fuca2   | Fuca2-002   | 0.014975    | 1.12715     | 1.12715      |
| Fundc2  | Fundc2-002  | 0.000394598 | 1.20172e-10 | -8.32138e+09 |
| Fut10   | Fut10-002   | 0.0113569   | 0.540321    | -1.85075     |
| Fxn     | Fxn-001     | 0.0293669   | 0.544319    | -1.83716     |
| Fxn     | Fxn-002     | 0.0116998   | 3.94681     | 3.94681      |
| Fxr2    | Fxr2-002    | 0.0267603   | 1.83462     | 1.83462      |
| Fxr2    | Fxr2-003    | 0.0480032   | 2.36803     | 2.36803      |
| Fyb     | Fyb-006     | 0.0314413   | 3.41599e-06 | -292741      |
| Fzd10   | Fzd10-001   | 0.0270183   | 0.504005    | -1.98411     |
| Fzd9    | Fzd9-001    | 0.0339939   | 0.831651    | -1.20243     |
| Fzr1    | Fzr1-004    | 0.00693829  | 0.669201    | -1.49432     |
| G2e3    | G2e3-004    | 0.0310923   | 2.64968e-09 | -3.77404e+08 |
| G6pc3   | G6pc3-002   | 0.0159917   | 1.38766     | 1.38766      |
| Gaa     | Gaa-001     | 0.0386195   | 0.847203    | -1.18035     |

|         |             |            |            |          |
|---------|-------------|------------|------------|----------|
| Gabarap | Gabarap-002 | 0.024509   | 1.24476    | 1.24476  |
| Gabra4  | Gabra4-002  | 0.00844335 | 0.117461   | -8.51344 |
| Gabra5  | Gabra5-002  | 0.00227153 | 0.741559   | -1.34851 |
| Gabrb1  | Gabrb1-001  | 0.0295599  | 0.897456   | -1.11426 |
| Gabrb2  | Gabrb2-002  | 0.0335989  | 0.541775   | -1.84578 |
| Gabrb3  | Gabrb3-006  | 0.0261211  | 0.840029   | -1.19044 |
| Gabrg2  | Gabrg2-001  | 0.00375539 | 0.799431   | -1.25089 |
| Gabbr2  | Gabbr2-003  | 0.0149542  | 46661.5    | 46661.5  |
| Gale    | Gale-002    | 0.0473808  | 0.281843   | -3.54808 |
| Galnt1  | Galnt1-007  | 0.0151007  | 2.45091    | 2.45091  |
| Galnt10 | Galnt10-001 | 0.0415756  | 1.21474    | 1.21474  |
| Galntl6 | Galntl6-005 | 0.0214304  | 0.00156284 | -639.861 |
| Galt    | Galt-005    | 0.0493888  | 0.193132   | -5.1778  |
| Galt    | Galt-002    | 0.00763028 | 1.71708    | 1.71708  |
| Gapdh   | Gapdh-006   | 0.0401466  | 1.94173    | 1.94173  |
| Gapvd1  | Gapvd1-005  | 0.00335126 | 3.96113    | 3.96113  |
| Garnl3  | Garnl3-006  | 0.0447688  | 294924     | 294924   |
| Gas2    | Gas2-003    | 0.0405224  | 0.635776   | -1.57288 |
| Gas2    | Gas2-002    | 0.0303725  | 2.02253    | 2.02253  |
| Gas5    | Gas5-012    | 0.049472   | 0.658164   | -1.51938 |
| Gas5    | Gas5-011    | 0.0383922  | 0.497801   | -2.00883 |
| Gclm    | Gclm-201    | 0.0165597  | 1.23544    | 1.23544  |
| Gcn1l1  | Gcn1l1-001  | 0.0152387  | 0.852362   | -1.17321 |
| Gdap1   | Gdap1-001   | 0.0103707  | 0.910929   | -1.09778 |
| Gdf6    | Gdf6-001    | 0.0492887  | 0.298654   | -3.34836 |
| Gdi1    | Gdi1-003    | 0.0224725  | 1.20944    | 1.20944  |
| Gemin4  | Gemin4-002  | 0.0469484  | 0.120345   | -8.30945 |
| Gga2    | Gga2-004    | 0.0274798  | 1.21154    | 1.21154  |
| Gga2    | Gga2-005    | 0.0419247  | 1.62931    | 1.62931  |
| Ggnbp1  | Ggnbp1-001  | 0.0269807  | 43.9938    | 43.9938  |
| Ggnbp2  | Ggnbp2-007  | 0.0253805  | 0.723566   | -1.38204 |
| Ghrl    | Ghrl-006    | 0.0382481  | 4063.92    | 4063.92  |
| Gigyf2  | Gigyf2-012  | 0.00931943 | 0.747266   | -1.33821 |
| Gin1    | Gin1-002    | 0.0414918  | 0.294445   | -3.39622 |
| Git2    | Git2-005    | 0.0258915  | 0.642009   | -1.55761 |
| Git2    | Git2-013    | 0.0119569  | 1.79709    | 1.79709  |
| Gjc1    | Gjc1-002    | 0.0407961  | 0.188411   | -5.30756 |
| Gjd3    | Gjd3-001    | 0.0389197  | 0.553846   | -1.80556 |
| Gk5     | Gk5-002     | 0.0407362  | 0.651256   | -1.53549 |
| Glb1l   | Glb1l-011   | 0.033923   | 77.5215    | 77.5215  |
| Glce    | Glce-201    | 0.00704115 | 1.41639    | 1.41639  |
| Glipr1  | Glipr1-001  | 0.00619287 | 0.230479   | -4.33879 |
| Glipr1  | Glipr1-201  | 0.0134679  | 0.422689   | -2.3658  |

|         |             |             |             |              |
|---------|-------------|-------------|-------------|--------------|
| Glis2   | Glis2-001   | 0.0155987   | 1.68829     | 1.68829      |
| Glmp    | Glmp-007    | 0.0306285   | 2.02864     | 2.02864      |
| Glo1    | Glo1-201    | 0.000287692 | 0.722923    | -1.38327     |
| Glod4   | Glod4-001   | 0.041045    | 0.836213    | -1.19587     |
| Glod4   | Glod4-004   | 2.51452e-06 | 32.31       | 32.31        |
| Glod4   | Glod4-009   | 0.0399437   | 195351      | 195351       |
| Glod4   | Glod4-002   | 0.0208608   | 1.49036     | 1.49036      |
| Glrx    | Glrx-001    | 0.00883302  | 0.84059     | -1.18964     |
| Gls     | Gls-002     | 0.00439078  | 0.906634    | -1.10298     |
| Gls     | Gls-014     | 0.0229451   | 0.620777    | -1.61088     |
| Glt8d2  | Glt8d2-005  | 0.047259    | 3.56191e-10 | -2.80748e+09 |
| Gm10138 | Gm10138-001 | 0.00960584  | 1.90915     | 1.90915      |
| Gm10190 | Gm10190-201 | 0.00514872  | 3.9479      | 3.9479       |
| Gm10390 | Gm10390-002 | 0.00924322  | 0.120188    | -8.32029     |
| Gm10390 | Gm10390-001 | 0.0363539   | 0.383933    | -2.60462     |
| Gm10419 | Gm10419-005 | 0.0111438   | 0.745052    | -1.34219     |
| Gm10463 | Gm10463-001 | 0.00894084  | 5.8065      | 5.8065       |
| Gm10463 | Gm10463-201 | 0.00894084  | 5.8065      | 5.8065       |
| Gm10509 | Gm10509-201 | 0.0165948   | 2.494       | 2.494        |
| Gm10575 | Gm10575-003 | 0.014081    | 4470.37     | 4470.37      |
| Gm10636 | Gm10636-001 | 0.0394563   | 0.271616    | -3.68166     |
| Gm10649 | Gm10649-002 | 0.0445458   | 0.69262     | -1.44379     |
| Gm10653 | Gm10653-001 | 0.00319812  | 0.0583325   | -17.1431     |
| Gm10653 | Gm10653-003 | 0.0125988   | 0.101279    | -9.87368     |
| Gm10710 | Gm10710-001 | 0.0445736   | 0.615959    | -1.62348     |
| Gm11128 | Gm11128-002 | 0.0496191   | 1.98035     | 1.98035      |
| Gm11149 | Gm11149-201 | 0.00600123  | 0.286698    | -3.48799     |
| Gm11346 | Gm11346-004 | 0.0358656   | 2.73484e+08 | 2.73484e+08  |
| Gm11410 | Gm11410-001 | 0.00193825  | 0.526011    | -1.9011      |
| Gm11423 | Gm11423-002 | 0.0460937   | 2.74696     | 2.74696      |
| Gm11469 | Gm11469-001 | 0.0156315   | 3.06675     | 3.06675      |
| Gm11517 | Gm11517-001 | 0.0456562   | 0.580156    | -1.72367     |
| Gm11626 | Gm11626-001 | 0.0263967   | 6.90466     | 6.90466      |
| Gm11855 | Gm11855-001 | 0.0433392   | 1.96913     | 1.96913      |
| Gm11948 | Gm11948-001 | 0.00781229  | 0.48063     | -2.0806      |
| Gm11974 | Gm11974-002 | 0.0196696   | 0.23717     | -4.21638     |
| Gm12103 | Gm12103-001 | 0.045053    | 5.37088     | 5.37088      |
| Gm12185 | Gm12185-201 | 0.0053548   | 1.94367     | 1.94367      |
| Gm12523 | Gm12523-001 | 0.0393945   | 0.244007    | -4.09825     |
| Gm12703 | Gm12703-001 | 0.0451938   | 3.99202     | 3.99202      |
| Gm12749 | Gm12749-001 | 0.020774    | 2.28715     | 2.28715      |
| Gm12784 | Gm12784-002 | 0.0352368   | 6.10526     | 6.10526      |
| Gm13033 | Gm13033-001 | 0.0117999   | 0.493904    | -2.02469     |



|         |             |             |             |             |
|---------|-------------|-------------|-------------|-------------|
| Gm1305  | Gm1305-001  | 0.0209508   | 0.371709    | -2.69028    |
| Gm13275 | Gm13275-001 | 0.048479    | 4.17871e+08 | 4.17871e+08 |
| Gm13276 | Gm13276-001 | 0.048479    | 4.0976e+08  | 4.0976e+08  |
| Gm13277 | Gm13277-001 | 0.048479    | 4.0976e+08  | 4.0976e+08  |
| Gm13278 | Gm13278-001 | 0.048479    | 4.0976e+08  | 4.0976e+08  |
| Gm13279 | Gm13279-001 | 0.048479    | 4.0976e+08  | 4.0976e+08  |
| Gm13289 | Gm13289-001 | 0.048479    | 4.0976e+08  | 4.0976e+08  |
| Gm13373 | Gm13373-001 | 0.000523716 | 3.20157     | 3.20157     |
| Gm13582 | Gm13582-001 | 0.0482878   | 5.48954     | 5.48954     |
| Gm13594 | Gm13594-001 | 0.0334781   | 0.225446    | -4.43565    |
| Gm13833 | Gm13833-001 | 0.0286572   | 0.149097    | -6.70704    |
| Gm13841 | Gm13841-001 | 0.0459539   | 14.8878     | 14.8878     |
| Gm14120 | Gm14120-001 | 0.00410977  | 0.125728    | -7.95366    |
| Gm14239 | Gm14239-001 | 0.0220256   | 0.253854    | -3.93927    |
| Gm14246 | Gm14246-001 | 0.00202668  | 0.392341    | -2.5488     |
| Gm14257 | Gm14257-001 | 0.0342786   | 0.279736    | -3.5748     |
| Gm14275 | Gm14275-001 | 0.0457966   | 4.73854     | 4.73854     |
| Gm14321 | Gm14321-002 | 0.0308859   | 4.27638     | 4.27638     |
| Gm14410 | Gm14410-001 | 0.0341547   | 4.10338     | 4.10338     |
| Gm14413 | Gm14413-001 | 0.0310437   | 8005.17     | 8005.17     |
| Gm14703 | Gm14703-001 | 0.0497332   | 0.646676    | -1.54637    |
| Gm14817 | Gm14817-001 | 0.0365205   | 0.524051    | -1.90821    |
| Gm15246 | Gm15246-002 | 0.00219919  | 4.79864     | 4.79864     |
| Gm15392 | Gm15392-001 | 0.0491918   | 0.292354    | -3.42051    |
| Gm15413 | Gm15413-001 | 0.010504    | 4.16589     | 4.16589     |
| Gm15421 | Gm15421-001 | 0.0069452   | 15.3627     | 15.3627     |
| Gm15422 | Gm15422-001 | 0.0374259   | 0.397109    | -2.5182     |
| Gm15487 | Gm15487-001 | 0.0130646   | 0.664731    | -1.50437    |
| Gm15503 | Gm15503-001 | 0.0403941   | 0.558542    | -1.79038    |
| Gm15513 | Gm15513-001 | 0.0338538   | 1.42041     | 1.42041     |
| Gm15535 | Gm15535-002 | 0.044057    | 0.482995    | -2.07042    |
| Gm15587 | Gm15587-001 | 0.0499368   | 1.85738     | 1.85738     |
| Gm15718 | Gm15718-001 | 0.0426291   | 6.35647     | 6.35647     |
| Gm15753 | Gm15753-001 | 0.0475569   | 7.6932      | 7.6932      |
| Gm15758 | Gm15758-001 | 0.00854135  | 0.00042499  | -2353       |
| Gm15813 | Gm15813-001 | 0.00869758  | 2.2433      | 2.2433      |
| Gm15842 | Gm15842-001 | 0.0437545   | 0.234063    | -4.27235    |
| Gm15952 | Gm15952-001 | 0.0265747   | 0.385507    | -2.59399    |
| Gm1604a | Gm1604a-201 | 0.0367112   | 1.71552     | 1.71552     |
| Gm16062 | Gm16062-001 | 0.0214811   | 0.382201    | -2.61642    |
| Gm16133 | Gm16133-001 | 0.0344329   | 0.198679    | -5.03323    |
| Gm16159 | Gm16159-001 | 0.0379569   | 8.47585     | 8.47585     |
| Gm16268 | Gm16268-001 | 0.0291531   | 0.531186    | -1.88258    |

|         |             |            |             |              |
|---------|-------------|------------|-------------|--------------|
| Gm16286 | Gm16286-004 | 0.0297592  | 0.563855    | -1.77351     |
| Gm16294 | Gm16294-001 | 0.00641622 | 0.109662    | -9.11891     |
| Gm16308 | Gm16308-001 | 0.0153853  | 0.140951    | -7.09466     |
| Gm16323 | Gm16323-001 | 0.049679   | 1.51466     | 1.51466      |
| Gm16567 | Gm16567-001 | 0.0304092  | 8.46935     | 8.46935      |
| Gm16845 | Gm16845-201 | 0.0337422  | 1.62131     | 1.62131      |
| Gm17039 | Gm17039-001 | 0.0214073  | 10.5112     | 10.5112      |
| Gm17098 | Gm17098-001 | 0.00520021 | 7.70627     | 7.70627      |
| Gm17203 | Gm17203-001 | 0.0379858  | 0.318442    | -3.14029     |
| Gm17529 | Gm17529-201 | 0.0311749  | 0.598483    | -1.67089     |
| Gm17546 | Gm17546-201 | 0.00240833 | 8.68799     | 8.68799      |
| Gm1947  | Gm1947-001  | 0.0125759  | 1.96433     | 1.96433      |
| Gm19721 | Gm19721-001 | 0.0137215  | 0.470233    | -2.12661     |
| Gm19744 | Gm19744-002 | 0.0428231  | 2.01862     | 2.01862      |
| Gm20162 | Gm20162-001 | 0.0386022  | 4.8267e+08  | 4.8267e+08   |
| Gm20302 | Gm20302-001 | 0.0400161  | 4.39155     | 4.39155      |
| Gm20319 | Gm20319-003 | 0.0240109  | 58.6649     | 58.6649      |
| Gm20511 | Gm20511-001 | 0.0422678  | 0.402744    | -2.48296     |
| Gm20554 | Gm20554-001 | 0.013959   | 9.37388e-07 | -1.06679e+06 |
| Gm20627 | Gm20627-001 | 0.0469064  | 5.13178     | 5.13178      |
| Gm20655 | Gm20655-002 | 0.0392248  | 2.60741     | 2.60741      |
| Gm20661 | Gm20661-002 | 0.0452343  | 347.627     | 347.627      |
| Gm20663 | Gm20663-001 | 0.0365141  | 0.248117    | -4.03035     |
| Gm20683 | Gm20683-001 | 0.0270489  | 1.16952     | 1.16952      |
| Gm20696 | Gm20696-003 | 0.0432214  | 0.0211833   | -47.207      |
| Gm20726 | Gm20726-201 | 0.0321335  | 9.87115     | 9.87115      |
| Gm20878 | Gm20878-005 | 0.0483091  | 0.214388    | -4.66445     |
| Gm21092 | Gm21092-202 | 0.0298418  | 1.52508     | 1.52508      |
| Gm21816 | Gm21816-001 | 0.00154696 | 0.23103     | -4.32843     |
| Gm21958 | Gm21958-201 | 0.0478826  | 0.376436    | -2.65649     |
| Gm21988 | Gm21988-002 | 0.0446614  | 0.486768    | -2.05437     |
| Gm21992 | Gm21992-006 | 0.0343099  | 0.0289254   | -34.5716     |
| Gm22314 | Gm22314-201 | 0.0263503  | 3.72782     | 3.72782      |
| Gm2238  | Gm2238-001  | 0.039139   | 1.51371     | 1.51371      |
| Gm22820 | Gm22820-201 | 0.00743317 | 0.0776964   | -12.8706     |
| Gm22952 | Gm22952-201 | 0.0335515  | 6.81923     | 6.81923      |
| Gm23257 | Gm23257-201 | 0.00939616 | 2.10876     | 2.10876      |
| Gm23356 | Gm23356-201 | 0.0378487  | 8.39459e+09 | 8.39459e+09  |
| Gm24119 | Gm24119-201 | 0.0272234  | 0.206016    | -4.85399     |
| Gm24368 | Gm24368-201 | 0.0436962  | 2.16288e+09 | 2.16288e+09  |
| Gm24451 | Gm24451-201 | 0.0457631  | 0.142175    | -7.03358     |
| Gm24564 | Gm24564-201 | 0.00360477 | 5.96468     | 5.96468      |
| Gm25212 | Gm25212-201 | 0.0322443  | 3.88225e-06 | -257582      |

|         |             |             |             |              |
|---------|-------------|-------------|-------------|--------------|
| Gm25266 | Gm25266-201 | 0.047629    | 0.329818    | -3.03198     |
| Gm25742 | Gm25742-201 | 0.0360824   | 3.17709e+08 | 3.17709e+08  |
| Gm25791 | Gm25791-201 | 0.0354658   | 0.318899    | -3.13579     |
| Gm25855 | Gm25855-201 | 0.0470683   | 1.09617e+09 | 1.09617e+09  |
| Gm2623  | Gm2623-001  | 0.0411851   | 0.123722    | -8.08262     |
| Gm2639  | Gm2639-001  | 0.00280027  | 4.02061     | 4.02061      |
| Gm26397 | Gm26397-201 | 0.0311858   | 0.197381    | -5.06635     |
| Gm26551 | Gm26551-201 | 0.0093869   | 2.83901     | 2.83901      |
| Gm26555 | Gm26555-002 | 0.0499881   | 5.94076e-05 | -16832.8     |
| Gm26603 | Gm26603-201 | 0.0406555   | 2.27385     | 2.27385      |
| Gm26636 | Gm26636-001 | 0.0158349   | 1.38196e+08 | 1.38196e+08  |
| Gm26658 | Gm26658-201 | 0.0318504   | 0.539714    | -1.85283     |
| Gm26668 | Gm26668-201 | 0.0279353   | 0.523686    | -1.90954     |
| Gm26679 | Gm26679-201 | 0.0260207   | 0.532322    | -1.87856     |
| Gm26711 | Gm26711-201 | 0.0228493   | 1.58822     | 1.58822      |
| Gm26747 | Gm26747-001 | 0.00300571  | 2.39722     | 2.39722      |
| Gm26773 | Gm26773-201 | 0.0180487   | 1.42976     | 1.42976      |
| Gm26776 | Gm26776-201 | 0.0131424   | 7.04978     | 7.04978      |
| Gm26793 | Gm26793-201 | 0.000263039 | 0.113449    | -8.81457     |
| Gm26798 | Gm26798-201 | 0.0347087   | 0.806774    | -1.2395      |
| Gm26824 | Gm26824-201 | 0.00435391  | 0.471121    | -2.1226      |
| Gm26853 | Gm26853-201 | 0.0257834   | 1.27086     | 1.27086      |
| Gm26858 | Gm26858-201 | 0.0103995   | 0.251515    | -3.97591     |
| Gm26905 | Gm26905-201 | 0.027172    | 0.538612    | -1.85663     |
| Gm26945 | Gm26945-001 | 0.0227916   | 1.84218     | 1.84218      |
| Gm27026 | Gm27026-001 | 0.0425167   | 5.80742     | 5.80742      |
| Gm27608 | Gm27608-201 | 0.0311255   | 14.361      | 14.361       |
| Gm2762  | Gm2762-008  | 0.00901651  | 0.739733    | -1.35184     |
| Gm28040 | Gm28040-002 | 0.00918595  | 0.133245    | -7.50494     |
| Gm28187 | Gm28187-001 | 0.0207586   | 0.501436    | -1.99427     |
| Gm28268 | Gm28268-001 | 0.0435798   | 4.27559     | 4.27559      |
| Gm28271 | Gm28271-001 | 0.0393328   | 0.408995    | -2.44502     |
| Gm28528 | Gm28528-001 | 0.0219943   | 5.98788     | 5.98788      |
| Gm29427 | Gm29427-001 | 0.0305837   | 0.055336    | -18.0714     |
| Gm29491 | Gm29491-001 | 0.00408114  | 2.65893     | 2.65893      |
| Gm29508 | Gm29508-001 | 0.0489756   | 0.326883    | -3.0592      |
| Gm29508 | Gm29508-002 | 0.00872803  | 13.9836     | 13.9836      |
| Gm29856 | Gm29856-002 | 0.0227157   | 7.76142e-07 | -1.28842e+06 |
| Gm36934 | Gm36934-001 | 0.0400161   | 4.39155     | 4.39155      |
| Gm36944 | Gm36944-001 | 0.0286855   | 2.77568     | 2.77568      |
| Gm36955 | Gm36955-001 | 0.000477365 | 11.9546     | 11.9546      |
| Gm37020 | Gm37020-001 | 0.0332727   | 3.2342      | 3.2342       |
| Gm37048 | Gm37048-001 | 0.0381177   | 3.51317     | 3.51317      |

|         |             |             |             |              |
|---------|-------------|-------------|-------------|--------------|
| Gm37056 | Gm37056-001 | 0.0153595   | 0.65265     | -1.53221     |
| Gm37158 | Gm37158-001 | 0.0306293   | 0.489749    | -2.04186     |
| Gm37174 | Gm37174-001 | 0.0252926   | 0.696385    | -1.43599     |
| Gm37276 | Gm37276-001 | 0.010059    | 0.67574     | -1.47986     |
| Gm37373 | Gm37373-001 | 0.0154924   | 0.193985    | -5.15504     |
| Gm37422 | Gm37422-001 | 0.0356601   | 0.801724    | -1.24731     |
| Gm37437 | Gm37437-001 | 0.00985424  | 0.129915    | -7.69732     |
| Gm37459 | Gm37459-002 | 0.00197266  | 0.113668    | -8.79755     |
| Gm37488 | Gm37488-001 | 0.0463284   | 0.192256    | -5.20141     |
| Gm37522 | Gm37522-001 | 0.0355225   | 0.381693    | -2.61991     |
| Gm37524 | Gm37524-001 | 0.0201619   | 0.129235    | -7.73785     |
| Gm37534 | Gm37534-001 | 0.00960348  | 0.270453    | -3.69749     |
| Gm37569 | Gm37569-001 | 0.0235942   | 0.142866    | -6.99955     |
| Gm37592 | Gm37592-001 | 0.0288567   | 0.499515    | -2.00194     |
| Gm37629 | Gm37629-001 | 0.0408936   | 3.45099     | 3.45099      |
| Gm3764  | Gm3764-008  | 0.0302835   | 0.785962    | -1.27233     |
| Gm37699 | Gm37699-001 | 0.034227    | 2.09826     | 2.09826      |
| Gm37755 | Gm37755-001 | 0.0397295   | 0.721148    | -1.38668     |
| Gm37934 | Gm37934-001 | 0.0097908   | 0.269268    | -3.71377     |
| Gm37983 | Gm37983-001 | 0.0366081   | 2.83358     | 2.83358      |
| Gm38071 | Gm38071-001 | 0.00299724  | 0.63721     | -1.56934     |
| Gm38080 | Gm38080-001 | 0.000189509 | 3.24305     | 3.24305      |
| Gm38344 | Gm38344-001 | 0.0126885   | 0.391692    | -2.55303     |
| Gm38357 | Gm38357-001 | 0.0470156   | 1.4864      | 1.4864       |
| Gm38364 | Gm38364-001 | 0.0265093   | 0.232893    | -4.29382     |
| Gm4117  | Gm4117-001  | 0.023843    | 0.683036    | -1.46405     |
| Gm42429 | Gm42429-001 | 0.0392897   | 0.702408    | -1.42367     |
| Gm42446 | Gm42446-001 | 0.0167319   | 0.279079    | -3.58322     |
| Gm42463 | Gm42463-001 | 0.00212034  | 0.547785    | -1.82553     |
| Gm42480 | Gm42480-001 | 0.0414711   | 4.17699     | 4.17699      |
| Gm42576 | Gm42576-001 | 0.0389708   | 2.807       | 2.807        |
| Gm42585 | Gm42585-001 | 0.00462319  | 0.450469    | -2.21991     |
| Gm42600 | Gm42600-001 | 0.000488188 | 2.24892     | 2.24892      |
| Gm42634 | Gm42634-001 | 0.0331807   | 0.224572    | -4.45291     |
| Gm42693 | Gm42693-001 | 0.011976    | 4.68336     | 4.68336      |
| Gm42735 | Gm42735-001 | 0.00769557  | 1.60207     | 1.60207      |
| Gm42744 | Gm42744-001 | 0.0209709   | 0.366142    | -2.73118     |
| Gm42802 | Gm42802-001 | 2.72271e-05 | 1.46321e-10 | -6.83427e+09 |
| Gm42819 | Gm42819-001 | 0.0276      | 4.21159     | 4.21159      |
| Gm42820 | Gm42820-001 | 0.0455321   | 0.323617    | -3.09007     |
| Gm42866 | Gm42866-001 | 0.0489657   | 2.87287     | 2.87287      |
| Gm42868 | Gm42868-001 | 0.0498303   | 3.37179     | 3.37179      |
| Gm42894 | Gm42894-001 | 0.00602544  | 0.579605    | -1.72531     |

|         |             |            |             |              |
|---------|-------------|------------|-------------|--------------|
| Gm42913 | Gm42913-001 | 0.0112898  | 0.56831     | -1.7596      |
| Gm42936 | Gm42936-001 | 0.0153467  | 0.0539434   | -18.538      |
| Gm42967 | Gm42967-001 | 0.0263536  | 1.76907     | 1.76907      |
| Gm42972 | Gm42972-001 | 0.0371751  | 3.33234     | 3.33234      |
| Gm42993 | Gm42993-001 | 0.021933   | 0.363605    | -2.75024     |
| Gm42995 | Gm42995-001 | 0.0491918  | 0.292354    | -3.42051     |
| Gm42997 | Gm42997-002 | 0.0480324  | 122.087     | 122.087      |
| Gm43011 | Gm43011-001 | 0.0483837  | 2.4056      | 2.4056       |
| Gm43076 | Gm43076-001 | 0.00933225 | 0.756127    | -1.32253     |
| Gm43140 | Gm43140-001 | 0.039175   | 0.704032    | -1.42039     |
| Gm43162 | Gm43162-001 | 0.0419023  | 2.6853      | 2.6853       |
| Gm43175 | Gm43175-001 | 0.045974   | 2.62661     | 2.62661      |
| Gm43335 | Gm43335-001 | 0.0356648  | 6.59137     | 6.59137      |
| Gm43455 | Gm43455-001 | 0.025377   | 1.308e-06   | -764523      |
| Gm43536 | Gm43536-001 | 0.0434839  | 0.41348     | -2.4185      |
| Gm43537 | Gm43537-001 | 0.0325314  | 3.20633     | 3.20633      |
| Gm43573 | Gm43573-001 | 0.0339696  | 4.84905e-08 | -2.06226e+07 |
| Gm43765 | Gm43765-001 | 0.0486044  | 5.06306     | 5.06306      |
| Gm43794 | Gm43794-001 | 0.0473633  | 0.231049    | -4.32809     |
| Gm43795 | Gm43795-001 | 0.0430684  | 2.65681     | 2.65681      |
| Gm43860 | Gm43860-001 | 0.0488377  | 1.33801     | 1.33801      |
| Gm4787  | Gm4787-001  | 0.0369453  | 1.7495      | 1.7495       |
| Gm5141  | Gm5141-201  | 0.0262514  | 0.22933     | -4.36053     |
| Gm5403  | Gm5403-001  | 0.0436816  | 0.714521    | -1.39954     |
| Gm5431  | Gm5431-002  | 0.0110444  | 2.46728     | 2.46728      |
| Gm5535  | Gm5535-201  | 0.0243501  | 0.235576    | -4.24492     |
| Gm5989  | Gm5989-001  | 0.0491744  | 6.87457e-07 | -1.45464e+06 |
| Gm6123  | Gm6123-001  | 0.04319    | 0.374607    | -2.66946     |
| Gm6293  | Gm6293-001  | 0.0480205  | 5863.82     | 5863.82      |
| Gm6483  | Gm6483-003  | 0.0122463  | 1.26306     | 1.26306      |
| Gm6768  | Gm6768-201  | 0.0491918  | 0.292354    | -3.42051     |
| Gm7173  | Gm7173-202  | 0.0251357  | 1.32365e+10 | 1.32365e+10  |
| Gm7765  | Gm7765-001  | 0.037177   | 5.73181     | 5.73181      |
| Gm7893  | Gm7893-001  | 0.00391034 | 9.33606     | 9.33606      |
| Gm8091  | Gm8091-001  | 0.0173445  | 4.77026     | 4.77026      |
| Gm8152  | Gm8152-001  | 0.017025   | 2.16745     | 2.16745      |
| Gm8210  | Gm8210-001  | 0.0459539  | 14.8878     | 14.8878      |
| Gm8494  | Gm8494-001  | 0.00125594 | 0.138336    | -7.22875     |
| Gm8668  | Gm8668-001  | 0.0267753  | 8.27263     | 8.27263      |
| Gm8850  | Gm8850-001  | 0.00213768 | 0.185713    | -5.38464     |
| Gm8898  | Gm8898-003  | 0.0386378  | 1.21284     | 1.21284      |
| Gm973   | Gm973-006   | 0.0466166  | 2.18505     | 2.18505      |
| Gm9826  | Gm9826-001  | 0.0320607  | 9.29736     | 9.29736      |

|         |             |            |             |              |
|---------|-------------|------------|-------------|--------------|
| Gm9828  | Gm9828-201  | 0.00317438 | 9.49843e-07 | -1.05281e+06 |
| Gm9864  | Gm9864-201  | 0.0129985  | 1.21877     | 1.21877      |
| Gm9910  | Gm9910-001  | 0.0462148  | 2.51225     | 2.51225      |
| Gm9922  | Gm9922-201  | 0.0313486  | 11.0116     | 11.0116      |
| Gm9947  | Gm9947-001  | 0.0426299  | 0.589951    | -1.69506     |
| Gm9954  | Gm9954-001  | 0.0147034  | 0.816267    | -1.22509     |
| Gmfb    | Gmfb-201    | 0.038819   | 0.865002    | -1.15607     |
| Gmip    | Gmip-004    | 0.0234866  | 17.777      | 17.777       |
| Gna12   | Gna12-001   | 0.0498217  | 1.07661     | 1.07661      |
| Gnaq    | Gnaq-001    | 0.0255484  | 0.907615    | -1.10179     |
| Gnas    | Gnas-013    | 0.0447518  | 0.0948476   | -10.5432     |
| Gnas    | Gnas-010    | 0.00951293 | 3.46623     | 3.46623      |
| Gnb1l   | Gnb1l-006   | 0.0434798  | 46.7613     | 46.7613      |
| Gnb2    | Gnb2-003    | 0.0150239  | 1.35596     | 1.35596      |
| Gnb2    | Gnb2-006    | 0.0251869  | 1.25789     | 1.25789      |
| Gnb2    | Gnb2-002    | 0.0163609  | 1.13618     | 1.13618      |
| Gnb4    | Gnb4-001    | 0.010762   | 1.2932      | 1.2932       |
| Gnb4    | Gnb4-006    | 0.0462985  | 1.92461     | 1.92461      |
| Gnb4    | Gnb4-004    | 0.0397889  | 1.90943     | 1.90943      |
| Gng13   | Gng13-001   | 0.0103472  | 3.59711     | 3.59711      |
| Gng2    | Gng2-001    | 0.0464023  | 0.895612    | -1.11656     |
| Gng8    | Gng8-006    | 0.038755   | 5.863       | 5.863        |
| Gngt2   | Gngt2-007   | 0.0446958  | 1.71448e-08 | -5.83266e+07 |
| Golga1  | Golga1-005  | 0.00326688 | 0.0276405   | -36.1787     |
| Golga1  | Golga1-004  | 0.0270659  | 1.49159     | 1.49159      |
| Golga2  | Golga2-008  | 0.0292409  | 0.204907    | -4.88026     |
| Golga4  | Golga4-201  | 0.0107089  | 1.1102      | 1.1102       |
| Golph3l | Golph3l-003 | 0.029438   | 0.275785    | -3.62601     |
| Gorasp1 | Gorasp1-201 | 0.0230054  | 1.15183     | 1.15183      |
| Gpalpp1 | Gpalpp1-201 | 0.00803646 | 0.945334    | -1.05783     |
| Gpank1  | Gpank1-004  | 0.0239773  | 487.135     | 487.135      |
| Gphn    | Gphn-201    | 0.0323716  | 0.864884    | -1.15622     |
| Gpr108  | Gpr108-201  | 0.0034836  | 1.21625     | 1.21625      |
| Gpr141  | Gpr141-201  | 0.0151337  | 1.95236     | 1.95236      |
| Gpr19   | Gpr19-010   | 0.00111024 | 0.2791      | -3.58295     |
| Gpr22   | Gpr22-001   | 0.0016985  | 0.746057    | -1.34038     |
| Gpr22   | Gpr22-002   | 0.0319159  | 0.763641    | -1.30952     |
| Gpr61   | Gpr61-002   | 0.00628514 | 0.751655    | -1.3304      |
| Gpr61   | Gpr61-001   | 0.037927   | 1.23217     | 1.23217      |
| Gpr63   | Gpr63-001   | 0.0306059  | 0.820111    | -1.21935     |
| Gpr68   | Gpr68-201   | 0.033802   | 1.62149     | 1.62149      |
| Gps1    | Gps1-004    | 0.0346198  | 0.534607    | -1.87053     |
| Gpx1    | Gpx1-003    | 0.0465101  | 1.39516     | 1.39516      |

|         |             |             |             |              |
|---------|-------------|-------------|-------------|--------------|
| Gpx3    | Gpx3-001    | 0.0137174   | 1.48476     | 1.48476      |
| Gpx8    | Gpx8-201    | 0.0398083   | 3.47638     | 3.47638      |
| Gramd1b | Gramd1b-007 | 0.0364448   | 0.735635    | -1.35937     |
| Gramd3  | Gramd3-201  | 0.0307539   | 1.15388     | 1.15388      |
| Grb10   | Grb10-009   | 0.0197371   | 1.54388     | 1.54388      |
| Grb14   | Grb14-007   | 0.0425423   | 0.262061    | -3.81591     |
| Grb7    | Grb7-003    | 0.00158938  | 53.8857     | 53.8857      |
| Greb1l  | Greb1l-001  | 0.0449042   | 0.838162    | -1.19309     |
| Grhpr   | Grhpr-005   | 0.0291187   | 2.67712     | 2.67712      |
| Gria2   | Gria2-001   | 0.00512309  | 0.892931    | -1.11991     |
| Grik1   | Grik1-203   | 0.0328887   | 3.44165     | 3.44165      |
| Grik4   | Grik4-001   | 0.0240079   | 0.788556    | -1.26814     |
| Grin1   | Grin1-005   | 0.0288869   | 0.855283    | -1.1692      |
| Grin2c  | Grin2c-001  | 0.00798971  | 0.84461     | -1.18398     |
| Gripap1 | Gripap1-001 | 0.00575501  | 0.326515    | -3.06265     |
| Grm4    | Grm4-001    | 0.0198448   | 8.34595     | 8.34595      |
| Grm4    | Grm4-002    | 0.0479966   | 1.84674     | 1.84674      |
| Gsc     | Gsc-001     | 0.0401521   | 9.34859     | 9.34859      |
| Gsg1    | Gsg1-003    | 0.0395623   | 5.94473     | 5.94473      |
| Gspt1   | Gspt1-001   | 0.0270438   | 0.877472    | -1.13964     |
| Gsta3   | Gsta3-004   | 0.035719    | 0.303985    | -3.28963     |
| Gsta3   | Gsta3-002   | 0.0138905   | 0.123495    | -8.09748     |
| Gsta3   | Gsta3-003   | 0.000385767 | 7.27652     | 7.27652      |
| Gtf2a2  | Gtf2a2-001  | 0.0428865   | 2.22883     | 2.22883      |
| Gtf2a2  | Gtf2a2-010  | 0.0143811   | 1.43733     | 1.43733      |
| Gtf2e2  | Gtf2e2-201  | 0.010566    | 0.134586    | -7.43017     |
| Gtf2i   | Gtf2i-004   | 0.0281602   | 0.822203    | -1.21625     |
| Gtf2i   | Gtf2i-025   | 0.0416296   | 0.122695    | -8.15032     |
| Gtf2i   | Gtf2i-201   | 0.0198079   | 1.41923     | 1.41923      |
| Gtpbp1  | Gtpbp1-201  | 0.0265051   | 1.06277     | 1.06277      |
| Gucd1   | Gucd1-002   | 0.0358908   | 0.323316    | -3.09295     |
| Gucy2g  | Gucy2g-001  | 0.04419     | 0.65931     | -1.51674     |
| Guf1    | Guf1-009    | 0.0464033   | 0.5274      | -1.89609     |
| Guf1    | Guf1-001    | 0.019935    | 1.16225     | 1.16225      |
| Gulp1   | Gulp1-002   | 0.0141324   | 4742.21     | 4742.21      |
| Gusb    | Gusb-001    | 0.0449848   | 0.746208    | -1.34011     |
| Gusb    | Gusb-006    | 0.0176296   | 2.61266     | 2.61266      |
| Gys1    | Gys1-001    | 0.00278475  | 1.24666     | 1.24666      |
| H19     | H19-001     | 0.033138    | 58307.5     | 58307.5      |
| H2-DMb1 | H2-DMb1-001 | 0.0378754   | 2.57334     | 2.57334      |
| H2-K1   | H2-K1-004   | 0.0291376   | 0.309513    | -3.23089     |
| H2-Q7   | H2-Q7-003   | 0.00563791  | 0.557356    | -1.79418     |
| H2afy   | H2afy-006   | 0.0399816   | 5.06238e-10 | -1.97536e+09 |

|           |               |            |             |          |
|-----------|---------------|------------|-------------|----------|
| H60b      | H60b-201      | 0.0473159  | 7.05623     | 7.05623  |
| Haa0      | Haa0-201      | 0.0112885  | 0.477157    | -2.09575 |
| Hacd4     | Hacd4-001     | 0.033418   | 0.769698    | -1.29921 |
| Harbi1    | Harbi1-001    | 0.00228085 | 1.33354     | 1.33354  |
| Hars2     | Hars2-003     | 0.0380923  | 0.00628997  | -158.983 |
| Hars2     | Hars2-002     | 0.00790384 | 1.4911      | 1.4911   |
| Hba-a1    | Hba-a1-001    | 0.0485378  | 2.92222     | 2.92222  |
| Hbegf     | Hbegf-201     | 0.0360395  | 1.2553      | 1.2553   |
| Hcar1     | Hcar1-001     | 0.0355141  | 0.581364    | -1.72009 |
| Hcfc1r1   | Hcfc1r1-003   | 0.00661758 | 0.716567    | -1.39554 |
| Hcfc1r1   | Hcfc1r1-002   | 0.00168018 | 2.29915     | 2.29915  |
| Hcls1     | Hcls1-001     | 0.0140255  | 1.38855     | 1.38855  |
| Hdac11    | Hdac11-002    | 0.0308911  | 0.26259     | -3.80822 |
| Hdac6     | Hdac6-005     | 0.0185336  | 6.91241     | 6.91241  |
| Hdgrfp3   | Hdgrfp3-003   | 0.011862   | 1.57102     | 1.57102  |
| Hectd1    | Hectd1-202    | 0.0394164  | 0.766602    | -1.30446 |
| Heg1      | Heg1-001      | 0.0308226  | 1.37045     | 1.37045  |
| Helz2     | Helz2-004     | 0.0201716  | 1.7579      | 1.7579   |
| Hemk1     | Hemk1-002     | 0.0166835  | 0.63106     | -1.58464 |
| Hemk1     | Hemk1-008     | 0.0288446  | 2.24048     | 2.24048  |
| Henmt1    | Henmt1-006    | 0.0306546  | 2.07148e-06 | -482748  |
| Herc1     | Herc1-003     | 0.0491028  | 1.59952     | 1.59952  |
| Herc6     | Herc6-004     | 0.0221482  | 114.687     | 114.687  |
| Herpud1   | Herpud1-001   | 0.0261399  | 1.33342     | 1.33342  |
| Hexim2    | Hexim2-001    | 0.0131904  | 0.673381    | -1.48504 |
| Hexim2    | Hexim2-002    | 0.00781843 | 2.25525     | 2.25525  |
| Hey1      | Hey1-001      | 0.0146826  | 1.09891     | 1.09891  |
| Hey2      | Hey2-001      | 0.0167784  | 1.38053     | 1.38053  |
| Hfm1      | Hfm1-002      | 0.0332796  | 2.4121      | 2.4121   |
| Hgf       | Hgf-004       | 0.0201441  | 6.47012     | 6.47012  |
| Hgsnat    | Hgsnat-201    | 0.0445595  | 0.933855    | -1.07083 |
| Hhat      | Hhat-006      | 0.0397045  | 17.4264     | 17.4264  |
| Hiatl1    | Hiatl1-001    | 0.042633   | 1.39968     | 1.39968  |
| Hibadh    | Hibadh-002    | 0.0121367  | 0.181285    | -5.51618 |
| Hip1      | Hip1-008      | 0.0197829  | 411724      | 411724   |
| Hira      | Hira-004      | 0.012748   | 1.85735     | 1.85735  |
| Hist1h3h  | Hist1h3h-001  | 0.0430767  | 23.6035     | 23.6035  |
| Hist2h3c2 | Hist2h3c2-001 | 0.0178856  | 1.70236     | 1.70236  |
| Hk3       | Hk3-003       | 0.0111907  | 4.56307     | 4.56307  |
| Hmgcr     | Hmgcr-005     | 0.0490011  | 2.91814     | 2.91814  |
| Hmgcs2    | Hmgcs2-001    | 0.0266775  | 1.52452     | 1.52452  |
| Hmgn2     | Hmgn2-013     | 0.0141231  | 4.20703     | 4.20703  |
| Hn1       | Hn1-002       | 0.00578076 | 0.277775    | -3.60004 |



|          |              |             |             |              |
|----------|--------------|-------------|-------------|--------------|
| Hnf1b    | Hnf1b-003    | 0.000127228 | 0.110068    | -9.08528     |
| Hnf1b    | Hnf1b-002    | 0.0167253   | 4.10685     | 4.10685      |
| Hnmt     | Hnmt-001     | 0.0357965   | 1.43955     | 1.43955      |
| Hnrnph1  | Hnrnph1-012  | 0.038711    | 0.000716552 | -1395.57     |
| Hnrnph1  | Hnrnph1-017  | 0.0413044   | 1.49344     | 1.49344      |
| Hnrnpk   | Hnrnpk-013   | 0.00744143  | 2.62793e-10 | -3.80527e+09 |
| Hnrnpk   | Hnrnpk-019   | 0.0116838   | 1.44936     | 1.44936      |
| HnrnpII  | HnrnpII-002  | 0.0180661   | 0.34931     | -2.86279     |
| Hnrnpr   | Hnrnpr-002   | 0.0230682   | 0.864809    | -1.15633     |
| Hoga1    | Hoga1-001    | 0.0191359   | 0.661683    | -1.5113      |
| Hook1    | Hook1-005    | 0.0422202   | 0.599963    | -1.66677     |
| Hook1    | Hook1-001    | 0.0303094   | 1.24892     | 1.24892      |
| Hook3    | Hook3-003    | 0.0293888   | 0.198504    | -5.03768     |
| Hoxc8    | Hoxc8-001    | 0.0394886   | 4.94122     | 4.94122      |
| Hp1bp3   | Hp1bp3-010   | 0.020686    | 1.85259     | 1.85259      |
| Hpca     | Hpca-007     | 0.0424524   | 0.571187    | -1.75074     |
| Hpse     | Hpse-002     | 0.0409605   | 525560      | 525560       |
| Hrk      | Hrk-001      | 0.0295117   | 1.1454      | 1.1454       |
| Hsd11b1  | Hsd11b1-001  | 0.0139717   | 0.57586     | -1.73653     |
| Hsd17b10 | Hsd17b10-001 | 0.0376855   | 0.894083    | -1.11847     |
| Hsd3b6   | Hsd3b6-201   | 0.0234366   | 1.07162e-07 | -9.3317e+06  |
| HsdI1    | HsdI1-201    | 0.0398215   | 1.10937     | 1.10937      |
| Hsp90b1  | Hsp90b1-005  | 0.0468291   | 4.40909     | 4.40909      |
| Hspa12a  | Hspa12a-201  | 0.00494004  | 0.867106    | -1.15326     |
| Hspa12b  | Hspa12b-001  | 0.0447029   | 1.38574     | 1.38574      |
| Hsph1    | Hsph1-006    | 0.00525097  | 2.84466     | 2.84466      |
| Htr3a    | Htr3a-201    | 0.0207258   | 0.758706    | -1.31803     |
| Htt      | Htt-002      | 0.0442901   | 3.05973     | 3.05973      |
| Hus1     | Hus1-001     | 0.0177351   | 1.51352     | 1.51352      |
| Hvcn1    | Hvcn1-004    | 0.0308305   | 1.69709e+08 | 1.69709e+08  |
| Hyi      | Hyi-201      | 0.0147872   | 0.68129     | -1.4678      |
| Hyi      | Hyi-001      | 0.0261443   | 2.29154     | 2.29154      |
| Hyls1    | Hyls1-001    | 0.0208155   | 0.792128    | -1.26242     |
| Hyls1    | Hyls1-002    | 0.0112218   | 0.56968     | -1.75537     |
| Hyou1    | Hyou1-005    | 0.0452161   | 4.36726e-07 | -2.28977e+06 |
| Hyou1    | Hyou1-008    | 0.0167652   | 9.91108     | 9.91108      |
| Ica1     | Ica1-005     | 0.0284877   | 0.193924    | -5.15667     |
| Ica1     | Ica1-006     | 0.0444849   | 1.46778     | 1.46778      |
| Ict1     | Ict1-002     | 0.0449114   | 0.797876    | -1.25333     |
| Id1      | Id1-002      | 0.00663812  | 5.1455      | 5.1455       |
| Id3      | Id3-002      | 0.0474697   | 2.02681     | 2.02681      |
| Id4      | Id4-201      | 0.0490596   | 1.50068     | 1.50068      |
| ldh3b    | ldh3b-001    | 0.0301033   | 0.944493    | -1.05877     |

|          |              |             |           |          |
|----------|--------------|-------------|-----------|----------|
| ldo1     | ldo1-001     | 0.039957    | 9.22321   | 9.22321  |
| ldo2     | ldo2-001     | 0.0338656   | 13.4218   | 13.4218  |
| ler3     | ler3-001     | 0.0319466   | 1.29848   | 1.29848  |
| lffo2    | lffo2-201    | 0.0310007   | 2.50376   | 2.50376  |
| lfi203   | lfi203-002   | 0.0338643   | 0.708783  | -1.41087 |
| lfi27l2b | lfi27l2b-001 | 0.02026     | 9.97575   | 9.97575  |
| lfitm2   | lfitm2-201   | 0.0251628   | 1.42816   | 1.42816  |
| lfnar2   | lfnar2-002   | 0.0298133   | 1.32661   | 1.32661  |
| lfngr2   | lfngr2-003   | 0.0221166   | 0.495511  | -2.01812 |
| lfrd2    | lfrd2-005    | 0.0441248   | 2.64036   | 2.64036  |
| lft22    | lft22-002    | 0.0289861   | 1.49147   | 1.49147  |
| lft46    | lft46-002    | 0.0295669   | 1.1313    | 1.1313   |
| lft81    | lft81-007    | 0.049109    | 0.0213562 | -46.8248 |
| lgf2     | lgf2-008     | 0.0446012   | 3.28384   | 3.28384  |
| lgf2     | lgf2-001     | 0.0475682   | 3.66641   | 3.66641  |
| lgfbp2   | lgfbp2-002   | 0.0196891   | 9.03922   | 9.03922  |
| lgfbp4   | lgfbp4-001   | 0.0497449   | 0.874733  | -1.14321 |
| lgfbp7   | lgfbp7-001   | 0.0351579   | 1.60632   | 1.60632  |
| lgfn1    | lgfn1-002    | 0.0264121   | 3.83924   | 3.83924  |
| lghm     | lghm-002     | 0.0470012   | 0.7474    | -1.33797 |
| lgsf3    | lgsf3-002    | 0.0101166   | 11.186    | 11.186   |
| lgsf5    | lgsf5-002    | 0.0312229   | 7.01511   | 7.01511  |
| lgsf9    | lgsf9-012    | 0.014563    | 0.245529  | -4.07283 |
| ll17rc   | ll17rc-002   | 0.0107123   | 2.70153   | 2.70153  |
| ll1r2    | ll1r2-004    | 0.049549    | 0.209669  | -4.76942 |
| ll1rapl1 | ll1rapl1-201 | 0.00390709  | 19.251    | 19.251   |
| ll2ra    | ll2ra-001    | 0.0111701   | 1.34606   | 1.34606  |
| ll6st    | ll6st-001    | 0.00959562  | 1.20762   | 1.20762  |
| llkap    | llkap-012    | 0.0120414   | 2.97524   | 2.97524  |
| llkap    | llkap-002    | 0.0217325   | 2.29356   | 2.29356  |
| llvbl    | llvbl-201    | 0.0135767   | 1.15057   | 1.15057  |
| lmp4     | lmp4-001     | 0.042204    | 1.14382   | 1.14382  |
| lnadl    | lnadl-010    | 0.0126902   | 9.11799   | 9.11799  |
| lnadl    | lnadl-006    | 0.0178602   | 9.00347   | 9.00347  |
| lng3     | lng3-002     | 0.0173859   | 0.240339  | -4.1608  |
| lng3     | lng3-003     | 0.0339925   | 1.55138   | 1.55138  |
| lnpp4b   | lnpp4b-005   | 2.36232e-05 | 0.0309486 | -32.3117 |
| lnpp5a   | lnpp5a-003   | 0.0471223   | 0.437213  | -2.28722 |
| lnpp5e   | lnpp5e-005   | 0.0444969   | 1.77793   | 1.77793  |
| lnpp5k   | lnpp5k-001   | 0.011405    | 0.666291  | -1.50084 |
| lnpp5k   | lnpp5k-003   | 0.0417085   | 1.66453   | 1.66453  |
| lnpp5k   | lnpp5k-006   | 0.0297423   | 1.7639    | 1.7639   |
| lnsig2   | lnsig2-014   | 0.0344257   | 36.5613   | 36.5613  |

|          |              |             |             |              |
|----------|--------------|-------------|-------------|--------------|
| Ints12   | Ints12-002   | 0.0417714   | 0.41336     | -2.4192      |
| Ints12   | Ints12-003   | 0.0204694   | 20.0406     | 20.0406      |
| Ints3    | Ints3-004    | 0.0107801   | 0.308868    | -3.23763     |
| Ints3    | Ints3-006    | 0.0156409   | 1.15942e-06 | -862501      |
| Ints8    | Ints8-006    | 0.0431494   | 0.490536    | -2.03859     |
| Intu     | Intu-001     | 0.0420728   | 1.17715     | 1.17715      |
| lp6k2    | lp6k2-001    | 0.0266771   | 0.652897    | -1.53164     |
| lpo13    | lpo13-002    | 0.0221008   | 0.0260055   | -38.4535     |
| lpo5     | lpo5-201     | 0.0394344   | 0.9126      | -1.09577     |
| lpo9     | lpo9-007     | 0.0150757   | 0.712118    | -1.40426     |
| lqcf3    | lqcf3-003    | 0.030741    | 0.000632145 | -1581.92     |
| lqgap1   | lqgap1-005   | 0.0158869   | 2.15126     | 2.15126      |
| lqgap1   | lqgap1-002   | 0.0409338   | 2.39523     | 2.39523      |
| lqsec1   | lqsec1-001   | 0.0187373   | 0.664664    | -1.50452     |
| lqsec1   | lqsec1-003   | 0.0318563   | 6.5204e+08  | 6.5204e+08   |
| lqub     | lqub-001     | 0.0305758   | 2.17018     | 2.17018      |
| lrf7     | lrf7-012     | 0.036339    | 0.025166    | -39.7362     |
| lrx5     | lrx5-001     | 0.00146219  | 3.15717     | 3.15717      |
| lsca1    | lsca1-002    | 0.0362978   | 0.473384    | -2.11245     |
| lsl1     | lsl1-002     | 0.0234574   | 1.45796e+09 | 1.45796e+09  |
| ltfg2    | ltfg2-004    | 0.000773854 | 7.71488     | 7.71488      |
| ltga2b   | ltga2b-007   | 0.00687138  | 0.000128217 | -7799.3      |
| ltga4    | ltga4-001    | 0.0107843   | 0.801127    | -1.24824     |
| ltga5    | ltga5-201    | 0.0121258   | 3.29011     | 3.29011      |
| ltga6    | ltga6-002    | 0.00481359  | 2.1306      | 2.1306       |
| ltga8    | ltga8-001    | 0.0159871   | 0.773182    | -1.29336     |
| ltgax    | ltgax-004    | 0.0381588   | 4.33928e-08 | -2.30453e+07 |
| ltgb1bp1 | ltgb1bp1-007 | 0.0131344   | 2.57272     | 2.57272      |
| ltgb4    | ltgb4-003    | 0.0192851   | 0.394236    | -2.53655     |
| ltgb4    | ltgb4-002    | 0.0389595   | 1.54578     | 1.54578      |
| ltpr2    | ltpr2-001    | 0.0499529   | 0.925359    | -1.08066     |
| ltpr2    | ltpr2-008    | 0.0272235   | 24.6236     | 24.6236      |
| ltpripl1 | ltpripl1-001 | 0.0410832   | 2.18266     | 2.18266      |
| lvns1abp | lvns1abp-002 | 0.0135321   | 1.73906     | 1.73906      |
| lvns1abp | lvns1abp-003 | 0.0452941   | 1.67712     | 1.67712      |
| Jak2     | Jak2-202     | 0.00931582  | 1.22852     | 1.22852      |
| Jakmip1  | Jakmip1-001  | 0.0186425   | 1.18508     | 1.18508      |
| Jazf1    | Jazf1-002    | 0.010647    | 0.315139    | -3.17321     |
| Jazf1    | Jazf1-003    | 0.0210114   | 0.291666    | -3.42858     |
| Jazf1    | Jazf1-001    | 0.0179556   | 0.874524    | -1.14348     |
| Jmjd7    | Jmjd7-004    | 0.00142417  | 0.0592142   | -16.8878     |
| Josd1    | Josd1-201    | 0.00464289  | 1.12263     | 1.12263      |
| Josd2    | Josd2-021    | 0.0467716   | 0.00130697  | -765.131     |

|         |             |             |          |          |
|---------|-------------|-------------|----------|----------|
| Jpx     | Jpx-001     | 0.0370321   | 0.828615 | -1.20683 |
| Jrk     | Jrk-001     | 0.0389341   | 0.821893 | -1.2167  |
| Kalrn   | Kalrn-013   | 0.0227277   | 0.225718 | -4.4303  |
| Kalrn   | Kalrn-004   | 0.0230076   | 0.768814 | -1.30071 |
| Kank1   | Kank1-004   | 0.0319398   | 6.10707  | 6.10707  |
| Kansl1l | Kansl1l-005 | 0.0445918   | 5.19526  | 5.19526  |
| Kansl3  | Kansl3-004  | 0.00704345  | 0.394956 | -2.53193 |
| Kansl3  | Kansl3-003  | 0.0153924   | 1.93815  | 1.93815  |
| Kars    | Kars-201    | 0.0305193   | 0.875285 | -1.14248 |
| Kars    | Kars-203    | 0.0183968   | 2.30255  | 2.30255  |
| Katnal2 | Katnal2-002 | 0.0360953   | 0.229273 | -4.36161 |
| Katnal2 | Katnal2-007 | 0.0208264   | 15.5551  | 15.5551  |
| Kazn    | Kazn-002    | 0.0206846   | 1.38704  | 1.38704  |
| Kbtbd2  | Kbtbd2-002  | 0.0422524   | 0.574491 | -1.74067 |
| Kcnd3   | Kcnd3-002   | 0.0198511   | 0.890091 | -1.12348 |
| Kcne2   | Kcne2-001   | 0.0384792   | 38.1084  | 38.1084  |
| Kcne3   | Kcne3-204   | 0.0298969   | 0.1324   | -7.55289 |
| Kcng2   | Kcng2-001   | 0.0399275   | 0.755954 | -1.32283 |
| Kcnh2   | Kcnh2-002   | 0.0434253   | 3.27457  | 3.27457  |
| Kcnip4  | Kcnip4-002  | 0.00683334  | 0.633728 | -1.57796 |
| Kcnip4  | Kcnip4-003  | 0.0316354   | 3.27207  | 3.27207  |
| Kcnj3   | Kcnj3-002   | 0.0426681   | 0.796756 | -1.25509 |
| Kcnk10  | Kcnk10-201  | 0.000601566 | 0.679206 | -1.47231 |
| Kcnk7   | Kcnk7-001   | 0.00923966  | 7.14098  | 7.14098  |
| Kcnma1  | Kcnma1-003  | 0.0210533   | 0.576526 | -1.73453 |
| Kcnma1  | Kcnma1-006  | 0.00141945  | 2.29559  | 2.29559  |
| Kcnma1  | Kcnma1-209  | 0.0472077   | 2.52247  | 2.52247  |
| Kcnmb2  | Kcnmb2-002  | 0.0319275   | 0.431771 | -2.31604 |
| Kcnmb4  | Kcnmb4-004  | 0.0313153   | 11.1661  | 11.1661  |
| Kcnt1   | Kcnt1-002   | 0.0334728   | 9.9038   | 9.9038   |
| Kcnt2   | Kcnt2-002   | 0.00093777  | 0.775726 | -1.28912 |
| Kcnv1   | Kcnv1-201   | 0.0422372   | 0.849229 | -1.17754 |
| Kctd14  | Kctd14-202  | 0.0194799   | 0.125262 | -7.98325 |
| Kctd14  | Kctd14-004  | 0.0116881   | 2.3356   | 2.3356   |
| Kctd18  | Kctd18-006  | 0.0414254   | 122.811  | 122.811  |
| Kctd7   | Kctd7-001   | 0.0357015   | 1.22218  | 1.22218  |
| Kctd9   | Kctd9-003   | 0.0322178   | 12.5023  | 12.5023  |
| Kdm2a   | Kdm2a-201   | 0.0132943   | 1.11914  | 1.11914  |
| Kdm2b   | Kdm2b-007   | 0.0410902   | 2.57159  | 2.57159  |
| Kdm5a   | Kdm5a-007   | 0.0138478   | 0.15382  | -6.5011  |
| Kdm5a   | Kdm5a-008   | 0.00302353  | 1.37658  | 1.37658  |
| Kdm5a   | Kdm5a-001   | 0.0346348   | 1.08542  | 1.08542  |
| Kdm5b   | Kdm5b-001   | 0.0147304   | 1.13056  | 1.13056  |

|         |             |             |             |              |
|---------|-------------|-------------|-------------|--------------|
| Kdm7a   | Kdm7a-002   | 0.0371376   | 1.90145     | 1.90145      |
| Khk     | Khk-004     | 0.0195196   | 0.44236     | -2.2606      |
| Khk     | Khk-003     | 0.0140196   | 0.32842     | -3.04488     |
| Khk     | Khk-002     | 0.0132863   | 5.55123     | 5.55123      |
| Kif24   | Kif24-001   | 0.0148595   | 1.33798     | 1.33798      |
| Kif27   | Kif27-201   | 0.00525185  | 1.63553     | 1.63553      |
| Kif2a   | Kif2a-007   | 0.0210185   | 0.492235    | -2.03155     |
| Kif3a   | Kif3a-006   | 0.00302898  | 0.692605    | -1.44382     |
| Kif4    | Kif4-001    | 0.0204487   | 1.51333     | 1.51333      |
| Kifap3  | Kifap3-001  | 0.0423314   | 0.902769    | -1.1077      |
| Kirrel  | Kirrel-001  | 0.0476385   | 1.58453     | 1.58453      |
| Kit     | Kit-008     | 0.0360327   | 0.459884    | -2.17446     |
| Kl      | Kl-002      | 0.032381    | 7.21861     | 7.21861      |
| Klc1    | Klc1-009    | 0.0201247   | 1.48167     | 1.48167      |
| Klf3    | Klf3-001    | 0.0281796   | 0.913066    | -1.09521     |
| Klf8    | Klf8-002    | 0.0206988   | 0.616345    | -1.62247     |
| Klhdc1  | Klhdc1-001  | 0.0484038   | 0.879344    | -1.13721     |
| Klhdc10 | Klhdc10-003 | 0.0446241   | 0.00309243  | -323.371     |
| Klhdc10 | Klhdc10-007 | 0.0415849   | 3.78088     | 3.78088      |
| Klhdc4  | Klhdc4-006  | 0.030932    | 1.00042e-10 | -9.99577e+09 |
| Klhl12  | Klhl12-001  | 0.0181187   | 0.385062    | -2.59698     |
| Klhl14  | Klhl14-001  | 0.0334668   | 70.7621     | 70.7621      |
| Klhl15  | Klhl15-002  | 0.0424498   | 23.7411     | 23.7411      |
| Klhl40  | Klhl40-201  | 0.0219319   | 0.733791    | -1.36279     |
| Klhl42  | Klhl42-001  | 0.0308639   | 1.09364     | 1.09364      |
| Klhl7   | Klhl7-002   | 0.0192054   | 1.09862     | 1.09862      |
| Klri2   | Klri2-001   | 0.0219968   | 2.47439     | 2.47439      |
| Kmt2c   | Kmt2c-003   | 0.0495722   | 0.254509    | -3.92913     |
| Kmt2c   | Kmt2c-007   | 0.0299099   | 15.9817     | 15.9817      |
| Kntc1   | Kntc1-003   | 0.0301912   | 3.84057e-05 | -26037.8     |
| Kptn    | Kptn-006    | 0.0465761   | 0.365436    | -2.73646     |
| Kras    | Kras-004    | 0.00367964  | 0.173463    | -5.76492     |
| Krt12   | Krt12-001   | 0.00235725  | 2.69247     | 2.69247      |
| Krt20   | Krt20-001   | 0.030831    | 1.82893     | 1.82893      |
| Krtcap3 | Krtcap3-009 | 4.52009e-05 | 12.6397     | 12.6397      |
| Lactb   | Lactb-201   | 0.0038259   | 1.19827     | 1.19827      |
| Lair1   | Lair1-002   | 0.0407528   | 8.00247     | 8.00247      |
| Lama5   | Lama5-001   | 0.0475634   | 1.56886     | 1.56886      |
| Lamb1   | Lamb1-007   | 0.00834165  | 3.91463     | 3.91463      |
| Lamp2   | Lamp2-005   | 0.00131656  | 2.96537     | 2.96537      |
| Lamtor3 | Lamtor3-008 | 0.0373389   | 1.61073     | 1.61073      |
| Las1l   | Las1l-007   | 0.0392262   | 1.71144     | 1.71144      |
| Lbp     | Lbp-001     | 0.0412819   | 5.79712     | 5.79712      |

|          |              |            |             |             |
|----------|--------------|------------|-------------|-------------|
| Lca5     | Lca5-006     | 0.0328347  | 6.30814     | 6.30814     |
| Lck      | Lck-004      | 0.0380249  | 0.149345    | -6.69592    |
| Lcn2     | Lcn2-005     | 0.0449897  | 946.797     | 946.797     |
| Lcp1     | Lcp1-008     | 0.0378433  | 0.265854    | -3.76147    |
| Lcp2     | Lcp2-002     | 0.0200151  | 2.39784     | 2.39784     |
| Ldb2     | Ldb2-006     | 0.025766   | 0.348697    | -2.86782    |
| Ldhb     | Ldhb-001     | 0.0130118  | 1.10368     | 1.10368     |
| Ldhd     | Ldhd-001     | 0.0139327  | 0.695585    | -1.43764    |
| Ldhd     | Ldhd-003     | 0.0305787  | 1.54836     | 1.54836     |
| Ldlrad3  | Ldlrad3-003  | 0.0350515  | 5.23693     | 5.23693     |
| Ldlrap1  | Ldlrap1-001  | 0.0338546  | 1.40751     | 1.40751     |
| Ldoc1l   | Ldoc1l-201   | 0.00390888 | 0.920246    | -1.08667    |
| Lect1    | Lect1-005    | 0.0347214  | 0.232248    | -4.30575    |
| Leo1     | Leo1-201     | 0.0409809  | 1.07608     | 1.07608     |
| Lgals2   | Lgals2-201   | 0.0140704  | 2.24248     | 2.24248     |
| Lgals3   | Lgals3-001   | 0.0307053  | 1.75429e-07 | -5.7003e+06 |
| Lgi1     | Lgi1-009     | 0.0243564  | 0.914543    | -1.09344    |
| Lhb      | Lhb-001      | 0.0352001  | 3.36006     | 3.36006     |
| Lhfpl3   | Lhfpl3-002   | 0.00441604 | 1.3968      | 1.3968      |
| Lhx9     | Lhx9-005     | 0.0295642  | 0.430118    | -2.32494    |
| Limch1   | Limch1-016   | 0.0357179  | 8.75861     | 8.75861     |
| Lime1    | Lime1-004    | 0.0209765  | 0.544178    | -1.83764    |
| Lin7b    | Lin7b-005    | 0.0318646  | 1.55296     | 1.55296     |
| Lincpint | Lincpint-004 | 0.00341018 | 1.09704e-07 | -9.1154e+06 |
| Lingo2   | Lingo2-004   | 0.0421955  | 0.0014701   | -680.225    |
| Lingo3   | Lingo3-201   | 0.0278047  | 1.31344     | 1.31344     |
| Lipe     | Lipe-007     | 0.019723   | 0.401915    | -2.48809    |
| Lipe     | Lipe-001     | 0.00834925 | 2.06668     | 2.06668     |
| Lipe     | Lipe-005     | 0.00310782 | 16.6279     | 16.6279     |
| Lmln     | Lmln-004     | 0.04224    | 64.1536     | 64.1536     |
| Lmntd2   | Lmntd2-201   | 0.0403296  | 2.8723      | 2.8723      |
| Lmo2     | Lmo2-004     | 0.0298607  | 0.211418    | -4.72996    |
| Lnp      | Lnp-004      | 0.0217362  | 0.282804    | -3.53602    |
| Lnp      | Lnp-012      | 0.0441309  | 0.0116334   | -85.959     |
| Lonp2    | Lonp2-001    | 0.0144622  | 0.880439    | -1.1358     |
| Lonrf2   | Lonrf2-201   | 0.0397157  | 0.801882    | -1.24707    |
| Lpar1    | Lpar1-005    | 0.0162098  | 1.31322     | 1.31322     |
| Lpar2    | Lpar2-201    | 0.0373672  | 1.92203     | 1.92203     |
| Lpl      | Lpl-002      | 0.0451175  | 4.11947     | 4.11947     |
| Lpo      | Lpo-001      | 0.041884   | 3.02004     | 3.02004     |
| Lppr3    | Lppr3-004    | 0.0490466  | 2.08242     | 2.08242     |
| Lrch4    | Lrch4-007    | 0.0330565  | 0.242823    | -4.11823    |
| Lrfn5    | Lrfn5-001    | 0.0474186  | 0.889487    | -1.12424    |

|        |            |             |            |          |
|--------|------------|-------------|------------|----------|
| Lrif1  | Lrif1-002  | 0.0329663   | 0.599113   | -1.66913 |
| Lrp11  | Lrp11-001  | 0.00835457  | 0.837001   | -1.19474 |
| Lrp1b  | Lrp1b-005  | 0.00401095  | 0.324289   | -3.08367 |
| Lrp1b  | Lrp1b-009  | 0.0414531   | 27.934     | 27.934   |
| Lrp2bp | Lrp2bp-005 | 0.00667751  | 0.0593568  | -16.8473 |
| Lrp4   | Lrp4-003   | 0.0187017   | 0.362973   | -2.75502 |
| Lrp6   | Lrp6-001   | 0.0389196   | 1.16832    | 1.16832  |
| Lrpap1 | Lrpap1-004 | 0.0445295   | 1.25548    | 1.25548  |
| Lrpprc | Lrpprc-005 | 0.000552665 | 0.495338   | -2.01882 |
| Lrrc10 | Lrrc10-201 | 0.0236859   | 0.272267   | -3.67287 |
| Lrrc14 | Lrrc14-001 | 0.0313456   | 0.662368   | -1.50974 |
| Lrrc14 | Lrrc14-003 | 0.0452145   | 0.489221   | -2.04407 |
| Lrrc18 | Lrrc18-001 | 0.0195041   | 2.08825    | 2.08825  |
| Lrrc26 | Lrrc26-001 | 0.0208881   | 0.718556   | -1.39168 |
| Lrrc38 | Lrrc38-001 | 0.0384092   | 1.57655    | 1.57655  |
| Lrrc40 | Lrrc40-005 | 0.00777409  | 0.138434   | -7.22363 |
| Lrrc51 | Lrrc51-007 | 0.026227    | 0.0515003  | -19.4174 |
| Lrrc51 | Lrrc51-005 | 0.0310707   | 0.0271798  | -36.792  |
| Lrrcc1 | Lrrcc1-001 | 0.0304665   | 0.839581   | -1.19107 |
| Lrriq1 | Lrriq1-001 | 0.0483249   | 26.7022    | 26.7022  |
| Lrrn3  | Lrrn3-201  | 0.0103012   | 0.904644   | -1.10541 |
| Lrtm2  | Lrtm2-201  | 0.0160601   | 2.09071    | 2.09071  |
| Lsamp  | Lsamp-003  | 0.00265589  | 0.655248   | -1.52614 |
| Lsamp  | Lsamp-002  | 0.00310293  | 0.894021   | -1.11854 |
| Lsg1   | Lsg1-004   | 0.0192856   | 1.26394    | 1.26394  |
| Lsm6   | Lsm6-002   | 0.0116291   | 1.26081    | 1.26081  |
| Lsp1   | Lsp1-008   | 0.0306749   | 6.96697    | 6.96697  |
| Ltbp1  | Ltbp1-007  | 0.0118613   | 0.450602   | -2.21925 |
| Ltbp1  | Ltbp1-002  | 0.0397729   | 2.38128    | 2.38128  |
| Ltbp3  | Ltbp3-201  | 0.0192751   | 1.41918    | 1.41918  |
| Ltbr   | Ltbr-001   | 0.00823127  | 1.36893    | 1.36893  |
| Luc7l  | Luc7l-007  | 0.0468825   | 10.9589    | 10.9589  |
| Luc7l2 | Luc7l2-004 | 0.0342573   | 0.00251657 | -397.367 |
| Luc7l3 | Luc7l3-002 | 0.00359094  | 2.34031    | 2.34031  |
| Ly6e   | Ly6e-013   | 0.0152874   | 2.65883    | 2.65883  |
| Lypd1  | Lypd1-002  | 0.0232734   | 0.832945   | -1.20056 |
| Lypd8  | Lypd8-001  | 0.0497005   | 0.192256   | -5.20141 |
| Lypla1 | Lypla1-001 | 0.0427415   | 1.14065    | 1.14065  |
| Lysmd4 | Lysmd4-202 | 0.0250502   | 0.727066   | -1.37539 |
| Lztr1  | Lztr1-001  | 0.04873     | 0.539024   | -1.8552  |
| Lzts1  | Lzts1-001  | 0.0128409   | 1.21699    | 1.21699  |
| Lzts1  | Lzts1-003  | 0.0441549   | 2.20044    | 2.20044  |
| Maff   | Maff-202   | 0.0167243   | 2.99168    | 2.99168  |

|          |              |            |             |             |
|----------|--------------|------------|-------------|-------------|
| Maged2   | Maged2-201   | 0.049693   | 0.745343    | -1.34166    |
| Magee2   | Magee2-001   | 0.0428328  | 0.866155    | -1.15453    |
| Magi2    | Magi2-010    | 0.0394792  | 7.11163     | 7.11163     |
| Magt1    | Magt1-201    | 0.00354249 | 0.580564    | -1.72246    |
| Magt1    | Magt1-001    | 0.00570555 | 1.4189      | 1.4189      |
| Mal      | Mal-001      | 0.0202699  | 1.15395     | 1.15395     |
| Mal2     | Mal2-201     | 0.0460253  | 0.863658    | -1.15787    |
| Malsu1   | Malsu1-001   | 0.00991636 | 0.58737     | -1.7025     |
| Mamstr   | Mamstr-003   | 0.0305157  | 0.524139    | -1.90789    |
| Man2c1   | Man2c1-005   | 0.0344097  | 0.573505    | -1.74366    |
| Man2c1   | Man2c1-002   | 0.0175398  | 2.4229      | 2.4229      |
| Man2c1os | Man2c1os-001 | 0.00405721 | 0.547324    | -1.82707    |
| Manf     | Manf-002     | 0.00484148 | 1.44522     | 1.44522     |
| Manf     | Manf-004     | 0.0424642  | 1.78427     | 1.78427     |
| Manf     | Manf-007     | 0.0283643  | 4.37321     | 4.37321     |
| Map2     | Map2-201     | 0.00101459 | 0.894769    | -1.11761    |
| Map2     | Map2-018     | 0.0436094  | 1.82201     | 1.82201     |
| Map2k4   | Map2k4-005   | 0.0473018  | 0.921038    | -1.08573    |
| Map2k6   | Map2k6-003   | 0.026648   | 3.48542     | 3.48542     |
| Map2k7   | Map2k7-002   | 0.0284346  | 0.751889    | -1.32998    |
| Map2k7   | Map2k7-004   | 0.0323466  | 4.34042     | 4.34042     |
| Map3k11  | Map3k11-201  | 0.00474989 | 1.16894     | 1.16894     |
| Map3k5   | Map3k5-006   | 0.0485073  | 1.78699e+06 | 1.78699e+06 |
| Map4k2   | Map4k2-017   | 0.0461158  | 363.801     | 363.801     |
| Mapk1    | Mapk1-004    | 0.0447469  | 1.75206     | 1.75206     |
| Mapk10   | Mapk10-004   | 0.00253488 | 0.481116    | -2.0785     |
| Mapk10   | Mapk10-006   | 0.0371496  | 0.554839    | -1.80232    |
| Mapk4    | Mapk4-001    | 0.0180978  | 1.28182     | 1.28182     |
| Mapk8ip2 | Mapk8ip2-001 | 0.0264326  | 0.939061    | -1.06489    |
| Mapk8ip3 | Mapk8ip3-007 | 0.0195804  | 0.533551    | -1.87424    |
| Mapk8ip3 | Mapk8ip3-008 | 0.00133307 | 0.38164     | -2.62027    |
| Mapk8ip3 | Mapk8ip3-003 | 0.0242753  | 0.635199    | -1.57431    |
| Mapk9    | Mapk9-202    | 0.0479435  | 0.774511    | -1.29114    |
| Mapkapk5 | Mapkapk5-013 | 0.0145984  | 0.135543    | -7.37773    |
| Mapkapk5 | Mapkapk5-006 | 0.0116426  | 2.06372     | 2.06372     |
| Mapt     | Mapt-001     | 0.0333272  | 1.07207     | 1.07207     |
| Mapt     | Mapt-003     | 0.0298696  | 1.66551     | 1.66551     |
| Mapt     | Mapt-012     | 0.0447753  | 11.3469     | 11.3469     |
| 01-Mar   | March1-001   | 0.0202535  | 0.42704     | -2.3417     |
| March1   | March1-202   | 0.0380002  | 0.551609    | -1.81288    |
| Marc1    | Marc1-201    | 0.027415   | 4.82154     | 4.82154     |
| Marc1    | Marc1-001    | 0.0274151  | 4.82153     | 4.82153     |
| Marc2    | Marc2-009    | 0.0424204  | 2.35201     | 2.35201     |



|          |              |            |             |              |
|----------|--------------|------------|-------------|--------------|
| March2   | March2-001   | 0.0285428  | 1.31312     | 1.31312      |
| March3   | March3-002   | 0.0413584  | 2.64598     | 2.64598      |
| March6   | March6-201   | 0.00151961 | 0.923702    | -1.0826      |
| March10  | March10-201  | 0.0421756  | 0.422782    | -2.36529     |
| Mark2    | Mark2-011    | 0.00140575 | 4.01808e-07 | -2.48875e+06 |
| Marveld1 | Marveld1-001 | 0.0487161  | 1.56238     | 1.56238      |
| Marveld3 | Marveld3-001 | 0.0175077  | 18.774      | 18.774       |
| Mas1     | Mas1-006     | 0.0200259  | 0.497231    | -2.01114     |
| Mast1    | Mast1-003    | 0.036648   | 0.592184    | -1.68866     |
| Mast4    | Mast4-018    | 0.0214357  | 0.461444    | -2.16711     |
| Matk     | Matk-011     | 0.0461878  | 0.888758    | -1.12517     |
| Matk     | Matk-010     | 0.0037599  | 11.1146     | 11.1146      |
| Matr3    | Matr3-011    | 0.00766639 | 0.000184775 | -5411.99     |
| Matr3    | Matr3-005    | 0.0139607  | 0.172799    | -5.78707     |
| Matr3    | Matr3-006    | 0.00447453 | 5.52636     | 5.52636      |
| Mbd4     | Mbd4-003     | 0.0265113  | 1.7384      | 1.7384       |
| Mblac2   | Mblac2-201   | 0.00190755 | 0.891967    | -1.12112     |
| Mbp      | Mbp-202      | 0.0445211  | 1.14585     | 1.14585      |
| Mbtps2   | Mbtps2-006   | 0.0254106  | 0.137917    | -7.25075     |
| Mcf2l    | Mcf2l-015    | 0.0371896  | 2.33817     | 2.33817      |
| Mcfd2    | Mcfd2-001    | 0.0230226  | 1.14415     | 1.14415      |
| Mchr1    | Mchr1-201    | 0.0201057  | 1.34597     | 1.34597      |
| Mcm10    | Mcm10-006    | 0.030542   | 0.000414889 | -2410.28     |
| Mcm3     | Mcm3-005     | 0.0493308  | 3.92669e-07 | -2.54667e+06 |
| Mcm8     | Mcm8-003     | 0.00718693 | 4.60097e-07 | -2.17345e+06 |
| Mcmbp    | Mcmbp-002    | 0.0422421  | 1.48679     | 1.48679      |
| Mctp1    | Mctp1-201    | 0.0387454  | 2.06801     | 2.06801      |
| Mcts1    | Mcts1-005    | 0.0371723  | 1.71754     | 1.71754      |
| Mdc1     | Mdc1-001     | 0.0205897  | 1.15525     | 1.15525      |
| Mdfic    | Mdfic-001    | 0.0214208  | 2.35785     | 2.35785      |
| Mdfic    | Mdfic-006    | 0.0214208  | 2.35785     | 2.35785      |
| Mdn1     | Mdn1-007     | 0.0358846  | 4.55108e-11 | -2.19728e+10 |
| Mdp1     | Mdp1-201     | 0.0391548  | 0.896484    | -1.11547     |
| Meaf6    | Meaf6-004    | 0.0441508  | 0.477421    | -2.09459     |
| Meaf6    | Meaf6-002    | 0.0344036  | 3.22427     | 3.22427      |
| Mecr     | Mecr-001     | 0.0144278  | 1.41497     | 1.41497      |
| Mecr     | Mecr-010     | 0.0157882  | 11.6969     | 11.6969      |
| Med1     | Med1-001     | 0.0133024  | 0.885087    | -1.12983     |
| Med14    | Med14-001    | 0.0391969  | 0.848193    | -1.17898     |
| Med20    | Med20-001    | 0.0313532  | 1.18115     | 1.18115      |
| Med28    | Med28-005    | 0.0249434  | 0.524152    | -1.90785     |
| Med8     | Med8-007     | 0.0451759  | 2.69042     | 2.69042      |
| Medag    | Medag-003    | 0.00708916 | 0.236868    | -4.22175     |

|         |             |             |            |          |
|---------|-------------|-------------|------------|----------|
| Medag   | Medag-001   | 0.0103822   | 1.66556    | 1.66556  |
| Mef2c   | Mef2c-008   | 0.0448797   | 2.82692    | 2.82692  |
| Megf9   | Megf9-001   | 0.0299959   | 0.906939   | -1.10261 |
| Meis2   | Meis2-006   | 0.0383967   | 1.80836    | 1.80836  |
| Men1    | Men1-006    | 0.0026465   | 0.432439   | -2.31246 |
| Men1    | Men1-011    | 0.0419338   | 0.00224656 | -445.125 |
| Mesdc1  | Mesdc1-001  | 0.00325785  | 1.25064    | 1.25064  |
| Metap1  | Metap1-006  | 0.00358756  | 9.58095    | 9.58095  |
| Mettl13 | Mettl13-006 | 0.041909    | 12.2836    | 12.2836  |
| Mettl18 | Mettl18-002 | 0.0390265   | 2.20834    | 2.20834  |
| Mettl23 | Mettl23-004 | 0.0066768   | 0.299538   | -3.33847 |
| Mettl23 | Mettl23-001 | 0.0468653   | 1.41787    | 1.41787  |
| Mettl25 | Mettl25-002 | 0.000370194 | 0.110017   | -9.0895  |
| Mettl8  | Mettl8-010  | 0.0430984   | 0.126503   | -7.90494 |
| Mfap1a  | Mfap1a-001  | 0.037359    | 1.06657    | 1.06657  |
| Mfsd4   | Mfsd4-003   | 0.0037789   | 0.785179   | -1.27359 |
| Mfsd4   | Mfsd4-011   | 0.0419742   | 247.139    | 247.139  |
| Mfsd6   | Mfsd6-002   | 0.0263319   | 0.668348   | -1.49623 |
| Mgat1   | Mgat1-012   | 0.0431025   | 1.5089     | 1.5089   |
| Mgat1   | Mgat1-004   | 0.0144365   | 3.26201    | 3.26201  |
| Mgat4b  | Mgat4b-005  | 0.000908499 | 2.50178    | 2.50178  |
| Mgat4b  | Mgat4b-003  | 0.0258961   | 2.29114    | 2.29114  |
| Mgat4c  | Mgat4c-001  | 0.0291806   | 0.43511    | -2.29827 |
| Mgll    | Mgll-201    | 0.0184253   | 0.657374   | -1.5212  |
| Mical3  | Mical3-015  | 0.0194413   | 2.35705    | 2.35705  |
| Mical3  | Mical3-009  | 0.0423296   | 1.14149    | 1.14149  |
| Mical3  | Mical3-001  | 0.0412891   | 1.28767    | 1.28767  |
| Micall1 | Micall1-201 | 0.0369525   | 1.13687    | 1.13687  |
| Mief1   | Mief1-201   | 0.0314321   | 0.9109     | -1.09782 |
| Mina    | Mina-003    | 0.0465975   | 46.5418    | 46.5418  |
| Mink1   | Mink1-013   | 0.0238435   | 0.785714   | -1.27273 |
| Mir421  | Mir421-201  | 0.0369308   | 0.136554   | -7.32311 |
| Mir8114 | Mir8114-201 | 0.0492157   | 0.221911   | -4.50632 |
| Misp    | Misp-202    | 0.0486128   | 2.01957    | 2.01957  |
| Misp    | Misp-201    | 0.048613    | 2.01957    | 2.01957  |
| Mitf    | Mitf-002    | 0.00917556  | 5.54971    | 5.54971  |
| Mitf    | Mitf-001    | 0.0165585   | 1.33286    | 1.33286  |
| Mknk1   | Mknk1-009   | 0.0405321   | 2.07554    | 2.07554  |
| Mllt10  | Mllt10-001  | 0.00194209  | 0.125356   | -7.97729 |
| Mllt11  | Mllt11-001  | 0.014888    | 0.925579   | -1.0804  |
| Mllt3   | Mllt3-001   | 0.0166647   | 0.818378   | -1.22193 |
| Mlxipl  | Mlxipl-005  | 0.02435     | 11.0236    | 11.0236  |
| Mmd     | Mmd-001     | 0.00735873  | 0.781437   | -1.27969 |

|        |            |             |             |              |
|--------|------------|-------------|-------------|--------------|
| Mmd2   | Mmd2-002   | 0.0247126   | 0.171659    | -5.82549     |
| Mmp11  | Mmp11-003  | 0.0417422   | 5.11518e-06 | -195497      |
| Mmp15  | Mmp15-001  | 0.00337057  | 1.37659     | 1.37659      |
| Mmp2   | Mmp2-201   | 0.0124469   | 1.89141     | 1.89141      |
| Mmp21  | Mmp21-003  | 0.0232184   | 1.37094e-08 | -7.29427e+07 |
| Mmp23  | Mmp23-004  | 0.0279938   | 4.95973     | 4.95973      |
| Mms19  | Mms19-004  | 0.00629291  | 1.73805     | 1.73805      |
| Mn1    | Mn1-001    | 0.0210846   | 1.34908     | 1.34908      |
| Mobp   | Mobp-001   | 0.0084739   | 1.23127     | 1.23127      |
| Mobp   | Mobp-201   | 0.00557624  | 1.85983     | 1.85983      |
| Mocs1  | Mocs1-003  | 0.0305859   | 0.627911    | -1.59258     |
| Mocs1  | Mocs1-007  | 0.00180357  | 3.01415     | 3.01415      |
| Mocs1  | Mocs1-008  | 0.00753027  | 539.527     | 539.527      |
| Morc2a | Morc2a-005 | 0.00991689  | 0.489216    | -2.04409     |
| Morn1  | Morn1-003  | 0.0395339   | 1.5868      | 1.5868       |
| Morn5  | Morn5-001  | 0.0367168   | 1.85584     | 1.85584      |
| Mospd2 | Mospd2-007 | 0.0434085   | 1.09046e-10 | -9.17044e+09 |
| Mospd3 | Mospd3-006 | 0.00881561  | 0.000885067 | -1129.86     |
| Mpc2   | Mpc2-003   | 0.0294684   | 0.617388    | -1.61973     |
| Mpdz   | Mpdz-014   | 0.0415264   | 0.034695    | -28.8226     |
| Mpp3   | Mpp3-001   | 0.0211341   | 0.88904     | -1.12481     |
| Mpp4   | Mpp4-007   | 0.0413658   | 5.35281     | 5.35281      |
| Mpp6   | Mpp6-002   | 0.0139309   | 1.58983     | 1.58983      |
| Mpp7   | Mpp7-201   | 0.00534615  | 1.92627     | 1.92627      |
| Mpv17  | Mpv17-006  | 0.0319242   | 37.6839     | 37.6839      |
| Mpv17l | Mpv17l-002 | 0.0211264   | 0.751537    | -1.33061     |
| Mr1    | Mr1-003    | 0.000628628 | 5.09943     | 5.09943      |
| Mras   | Mras-004   | 0.00939044  | 0.00256034  | -390.573     |
| Mre11a | Mre11a-001 | 0.031149    | 1.84374     | 1.84374      |
| Mrgbp  | Mrgbp-005  | 0.0363749   | 1.42441     | 1.42441      |
| Mroh7  | Mroh7-003  | 0.0311963   | 1.59841     | 1.59841      |
| Mrpl12 | Mrpl12-002 | 0.0381054   | 1.44698     | 1.44698      |
| Mrpl15 | Mrpl15-007 | 0.0110789   | 0.518803    | -1.92751     |
| Mrpl15 | Mrpl15-001 | 0.0273088   | 1.36506     | 1.36506      |
| Mrpl27 | Mrpl27-004 | 0.0108955   | 0.0103336   | -96.772      |
| Mrpl27 | Mrpl27-003 | 0.00483731  | 40.2073     | 40.2073      |
| Mrpl3  | Mrpl3-001  | 0.0210356   | 0.846932    | -1.18073     |
| Mrpl30 | Mrpl30-007 | 0.0108685   | 0.633222    | -1.57923     |
| Mrpl33 | Mrpl33-003 | 0.0455613   | 0.0428761   | -23.323      |
| Mrpl48 | Mrpl48-005 | 0.0298914   | 2.9388      | 2.9388       |
| Mrpl55 | Mrpl55-004 | 0.0139406   | 0.338717    | -2.95231     |
| Mrpl55 | Mrpl55-001 | 0.0355131   | 2.66185     | 2.66185      |
| Mrps14 | Mrps14-001 | 0.028082    | 0.821164    | -1.21778     |

|         |             |            |             |              |
|---------|-------------|------------|-------------|--------------|
| Mrps17  | Mrps17-003  | 0.0435529  | 0.356129    | -2.80797     |
| Mrps18c | Mrps18c-005 | 0.00380196 | 0.138647    | -7.21256     |
| Mrps18c | Mrps18c-002 | 0.00450669 | 0.235706    | -4.24257     |
| Mrps21  | Mrps21-004  | 0.0288378  | 0.32        | -3.125       |
| Mrps23  | Mrps23-002  | 0.0112503  | 0.305079    | -3.27784     |
| Mrps23  | Mrps23-001  | 0.0111455  | 1.39085     | 1.39085      |
| Mrps23  | Mrps23-003  | 0.0345933  | 807959      | 807959       |
| Mrps24  | Mrps24-004  | 0.0350395  | 0.00194018  | -515.415     |
| Mrps35  | Mrps35-003  | 0.0295624  | 0.482152    | -2.07404     |
| Msc     | Msc-001     | 0.0396874  | 0.397422    | -2.51622     |
| Msh2    | Msh2-001    | 0.0357597  | 0.870533    | -1.14872     |
| Msl1    | Msl1-006    | 0.0287214  | 9.49359     | 9.49359      |
| Msl2    | Msl2-002    | 0.0393849  | 0.806486    | -1.23995     |
| Msr2    | Msr2-002    | 0.0318939  | 1.03336e-07 | -9.67715e+06 |
| Mst1r   | Mst1r-001   | 0.0498152  | 0.340573    | -2.93623     |
| Mta1    | Mta1-001    | 0.0434715  | 0.579042    | -1.72699     |
| Mta2    | Mta2-001    | 0.0240788  | 1.10783     | 1.10783      |
| Mtch2   | Mtch2-002   | 0.00737103 | 0.755804    | -1.32309     |
| Mtcl1   | Mtcl1-011   | 0.0209052  | 1.66631     | 1.66631      |
| Mtf1    | Mtf1-201    | 0.017072   | 1.11136     | 1.11136      |
| Mthfr   | Mthfr-001   | 0.014422   | 1.23355     | 1.23355      |
| Mthfr   | Mthfr-006   | 0.00901952 | 7.20014     | 7.20014      |
| Mthfsd  | Mthfsd-005  | 0.028242   | 0.225022    | -4.44401     |
| Mthfsd  | Mthfsd-011  | 0.0446285  | 11.8327     | 11.8327      |
| Mthfsd  | Mthfsd-010  | 0.0122879  | 1.71979     | 1.71979      |
| Mthfsd  | Mthfsd-003  | 0.039083   | 2.20505     | 2.20505      |
| Mtm1    | Mtm1-007    | 0.0405107  | 1.72312     | 1.72312      |
| Mtmr11  | Mtmr11-005  | 0.0181678  | 0.137711    | -7.26159     |
| Mtmr14  | Mtmr14-002  | 0.00746228 | 11.8567     | 11.8567      |
| Mtrf1l  | Mtrf1l-001  | 0.00847816 | 1.25371     | 1.25371      |
| Mturn   | Mturn-001   | 0.0392181  | 0.893492    | -1.1192      |
| Muc19   | Muc19-201   | 0.0168556  | 8.6096      | 8.6096       |
| Mum1    | Mum1-003    | 0.0143256  | 1.36416     | 1.36416      |
| Mum1l1  | Mum1l1-202  | 0.0117975  | 2.45588     | 2.45588      |
| Mus81   | Mus81-011   | 0.0111361  | 3716.47     | 3716.47      |
| Mxd4    | Mxd4-003    | 0.00729145 | 1.28072     | 1.28072      |
| Mxd4    | Mxd4-001    | 0.0260845  | 1.16963     | 1.16963      |
| Mxra7   | Mxra7-001   | 0.0290628  | 1.25292     | 1.25292      |
| Mxra8   | Mxra8-004   | 0.0472118  | 5.54135e-08 | -1.80462e+07 |
| Mxra8   | Mxra8-003   | 0.00111075 | 2.78975e+09 | 2.78975e+09  |
| Mxra8   | Mxra8-005   | 0.010749   | 4.0952      | 4.0952       |
| Myc     | Myc-001     | 0.0225587  | 0.408375    | -2.44873     |
| Myc     | Myc-005     | 0.0225587  | 0.408375    | -2.44873     |

|          |              |            |          |          |
|----------|--------------|------------|----------|----------|
| Myc      | Myc-202      | 0.0404886  | 18.1017  | 18.1017  |
| Mycbp    | Mycbp-001    | 0.0390515  | 1.4149   | 1.4149   |
| Mycbp2   | Mycbp2-002   | 0.041147   | 0.837062 | -1.19466 |
| Mycn     | Mycn-001     | 0.0219072  | 0.544295 | -1.83724 |
| Myh10    | Myh10-001    | 0.0216797  | 1.12301  | 1.12301  |
| Myh7b    | Myh7b-002    | 0.0491984  | 0.609376 | -1.64102 |
| Myl3     | Myl3-005     | 0.0321906  | 356918   | 356918   |
| Myl6     | Myl6-201     | 0.0241273  | 1.11918  | 1.11918  |
| Mylip    | Mylip-201    | 0.0457412  | 0.872501 | -1.14613 |
| Mynn     | Mynn-005     | 0.0466375  | 3.36205  | 3.36205  |
| Myo1c    | Myo1c-001    | 0.0386947  | 1.38742  | 1.38742  |
| Myo1e    | Myo1e-201    | 0.0423752  | 1.22156  | 1.22156  |
| Myo5b    | Myo5b-009    | 0.00406141 | 0.711347 | -1.40578 |
| Myo9a    | Myo9a-001    | 0.00364435 | 0.736125 | -1.35847 |
| Myo9a    | Myo9a-003    | 0.0386813  | 1.2161   | 1.2161   |
| Myrf     | Myrf-004     | 0.00627093 | 4.1321   | 4.1321   |
| Myrip    | Myrip-001    | 0.039769   | 1.14322  | 1.14322  |
| Mzf1     | Mzf1-006     | 0.0192473  | 0.804164 | -1.24353 |
| Mzf1     | Mzf1-003     | 0.0480188  | 113.534  | 113.534  |
| Mzt2     | Mzt2-003     | 0.0277606  | 0.159412 | -6.27307 |
| n-R5s8   | n-R5s8-201   | 0.0492586  | 0.232893 | -4.29382 |
| N4bp1    | N4bp1-201    | 0.0182919  | 1.10937  | 1.10937  |
| N4bp2    | N4bp2-007    | 0.02345    | 6.97177  | 6.97177  |
| N4bp3    | N4bp3-001    | 0.00874805 | 1.38057  | 1.38057  |
| Naa15    | Naa15-002    | 0.0481598  | 0.630735 | -1.58545 |
| Naa15    | Naa15-001    | 0.038497   | 0.654485 | -1.52792 |
| Naa35    | Naa35-014    | 0.0486096  | 37.0365  | 37.0365  |
| Naaladl2 | Naaladl2-002 | 0.0136675  | 1.63264  | 1.63264  |
| Nab1     | Nab1-002     | 0.0414409  | 220.469  | 220.469  |
| Nabp1    | Nabp1-006    | 0.00964022 | 0.579192 | -1.72654 |
| Nadk     | Nadk-001     | 0.0200711  | 0.676615 | -1.47794 |
| Nadk     | Nadk-002     | 0.0483513  | 1.40691  | 1.40691  |
| Nadk2    | Nadk2-002    | 0.00272417 | 0.770504 | -1.29785 |
| Nadk2    | Nadk2-201    | 0.00588576 | 1.27825  | 1.27825  |
| Nadk2    | Nadk2-001    | 0.0047872  | 1.28748  | 1.28748  |
| Nagk     | Nagk-008     | 0.0294504  | 0.21696  | -4.60915 |
| Naip6    | Naip6-201    | 0.0118079  | 2.14657  | 2.14657  |
| Nanos1   | Nanos1-201   | 0.0348934  | 1.12186  | 1.12186  |
| Napb     | Napb-001     | 0.0121067  | 0.894351 | -1.11813 |
| Napg     | Napg-001     | 0.048058   | 0.923429 | -1.08292 |
| Narfl    | Narfl-002    | 0.0383465  | 1.52993  | 1.52993  |
| Nav3     | Nav3-001     | 0.0432317  | 0.778884 | -1.28389 |
| Nbea     | Nbea-008     | 0.0445036  | 0.509403 | -1.96308 |

|         |             |            |             |              |
|---------|-------------|------------|-------------|--------------|
| Nbeal1  | Nbeal1-006  | 0.00881933 | 0.117975    | -8.47636     |
| Nbr1    | Nbr1-012    | 0.0492178  | 1.80685     | 1.80685      |
| Ncam1   | Ncam1-001   | 0.0377618  | 0.910544    | -1.09825     |
| Ncapd2  | Ncapd2-006  | 0.0180957  | 0.318913    | -3.13565     |
| Nckap1  | Nckap1-003  | 0.024713   | 0.641999    | -1.55764     |
| Ncmap   | Ncmap-201   | 0.0103956  | 3.55563     | 3.55563      |
| Ncoa1   | Ncoa1-201   | 0.0234468  | 0.916165    | -1.09151     |
| Ncoa3   | Ncoa3-201   | 0.045968   | 1.23413     | 1.23413      |
| Ncoa4   | Ncoa4-004   | 0.0369858  | 0.662443    | -1.50956     |
| Ncoa7   | Ncoa7-201   | 0.014441   | 0.940052    | -1.06377     |
| Ncor1   | Ncor1-006   | 0.0009529  | 0.594374    | -1.68244     |
| Ncor1   | Ncor1-015   | 0.0465846  | 0.241565    | -4.13968     |
| Ncor2   | Ncor2-001   | 0.029421   | 1.25918     | 1.25918      |
| Ndc1    | Ndc1-002    | 0.0468465  | 0.625476    | -1.59878     |
| Ndfip2  | Ndfip2-003  | 0.0391776  | 0.835826    | -1.19642     |
| Ndn12   | Ndn12-001   | 0.00980997 | 0.817387    | -1.22341     |
| Ndr3    | Ndr3-006    | 0.00703182 | 2.24314e-10 | -4.45804e+09 |
| Ndr4    | Ndr4-007    | 0.0269663  | 1.60984     | 1.60984      |
| Ndr4    | Ndr4-010    | 0.0276112  | 1.19073     | 1.19073      |
| Ndufaf4 | Ndufaf4-002 | 0.0093097  | 0.848027    | -1.17921     |
| Ndufaf4 | Ndufaf4-003 | 0.0242284  | 1.5358      | 1.5358       |
| Ndufaf7 | Ndufaf7-201 | 0.0436983  | 1.12012     | 1.12012      |
| Ndufb10 | Ndufb10-005 | 0.0152728  | 2.69328     | 2.69328      |
| Ndufb2  | Ndufb2-001  | 0.0203835  | 1.20607     | 1.20607      |
| Ndufs7  | Ndufs7-004  | 0.0147344  | 2.52478     | 2.52478      |
| Ndufv2  | Ndufv2-004  | 0.0112666  | 0.205957    | -4.85539     |
| Necab3  | Necab3-001  | 0.0399827  | 1.26707     | 1.26707      |
| Necap2  | Necap2-005  | 0.00480079 | 4.62627     | 4.62627      |
| Nedd4   | Nedd4-003   | 0.0195446  | 0.16635     | -6.01144     |
| Nedd4   | Nedd4-008   | 0.0449793  | 3.08806     | 3.08806      |
| Nedd4l  | Nedd4l-201  | 0.0378773  | 1.12747     | 1.12747      |
| Nek1    | Nek1-002    | 0.027073   | 0.690482    | -1.44826     |
| Nek1    | Nek1-001    | 0.0459058  | 1.10907     | 1.10907      |
| Nek10   | Nek10-001   | 0.0308182  | 2.05596     | 2.05596      |
| Nek5    | Nek5-201    | 0.0416823  | 3.97033     | 3.97033      |
| Nelfe   | Nelfe-005   | 0.0469516  | 2.8063      | 2.8063       |
| Neto1   | Neto1-201   | 0.0408382  | 0.898104    | -1.11346     |
| Neurl3  | Neurl3-001  | 0.0172812  | 1.57393     | 1.57393      |
| Neurl4  | Neurl4-008  | 0.0382443  | 0.666914    | -1.49944     |
| Neurl4  | Neurl4-007  | 0.0359943  | 0.67731     | -1.47643     |
| Neurod6 | Neurod6-001 | 0.0452685  | 0.834687    | -1.19805     |
| Nexn    | Nexn-004    | 0.00563592 | 9.84617     | 9.84617      |
| Nf1     | Nf1-007     | 0.00672056 | 2.06816     | 2.06816      |

|          |              |            |             |          |
|----------|--------------|------------|-------------|----------|
| Nfat5    | Nfat5-009    | 0.0417199  | 0.414554    | -2.41223 |
| Nfatc2ip | Nfatc2ip-001 | 0.019978   | 0.785711    | -1.27273 |
| Nfe2l1   | Nfe2l1-003   | 0.0218237  | 11.3555     | 11.3555  |
| Nfia     | Nfia-002     | 0.0201672  | 0.66827     | -1.4964  |
| Nfkb1    | Nfkb1-005    | 0.03703    | 0.242938    | -4.11628 |
| Nfkb1    | Nfkb1-007    | 0.047384   | 0.426316    | -2.34568 |
| Nfkbid   | Nfkbid-001   | 0.0245452  | 24.7833     | 24.7833  |
| Nfkbiz   | Nfkbiz-003   | 0.017083   | 0.320689    | -3.11829 |
| Nfxl1    | Nfxl1-005    | 0.0306627  | 0.000110341 | -9062.84 |
| Nfya     | Nfya-010     | 0.0372081  | 1.61361     | 1.61361  |
| Nfya     | Nfya-005     | 0.00586136 | 5.39426     | 5.39426  |
| Ngef     | Ngef-002     | 0.0481967  | 1.40237     | 1.40237  |
| Nhlh1    | Nhlh1-001    | 0.029395   | 0.691287    | -1.44658 |
| Ninj1    | Ninj1-001    | 0.0382237  | 1.3921      | 1.3921   |
| Ninj2    | Ninj2-002    | 0.0457922  | 542.917     | 542.917  |
| Nipal2   | Nipal2-201   | 0.0179714  | 1.41362     | 1.41362  |
| Nipsnap1 | Nipsnap1-002 | 0.0219     | 0.621963    | -1.60781 |
| Nisch    | Nisch-001    | 0.0044381  | 0.882306    | -1.13339 |
| Nkiras2  | Nkiras2-004  | 0.00312912 | 0.256817    | -3.89382 |
| Nle1     | Nle1-001     | 0.00392869 | 0.791452    | -1.2635  |
| Nle1     | Nle1-006     | 0.0297264  | 5.05761     | 5.05761  |
| Nle1     | Nle1-002     | 0.00563461 | 5.54132     | 5.54132  |
| Nlgn1    | Nlgn1-201    | 0.014001   | 0.649569    | -1.53948 |
| Nlgn3    | Nlgn3-002    | 0.0408776  | 0.780603    | -1.28106 |
| Nmbr     | Nmbr-001     | 0.00474351 | 1.56613     | 1.56613  |
| Nme3     | Nme3-003     | 0.0239453  | 26.13       | 26.13    |
| Nmnat1   | Nmnat1-001   | 0.016354   | 1.99141     | 1.99141  |
| Nnt      | Nnt-001      | 0.00312272 | 2.25105     | 2.25105  |
| Nog      | Nog-001      | 0.00447788 | 0.683591    | -1.46286 |
| Nol4     | Nol4-001     | 0.0391884  | 0.829033    | -1.20622 |
| Nop58    | Nop58-001    | 0.0133453  | 0.874497    | -1.14351 |
| Nop58    | Nop58-005    | 0.0321629  | 0.273771    | -3.65269 |
| Nop58    | Nop58-002    | 0.0031576  | 1.15648     | 1.15648  |
| Nos1     | Nos1-001     | 0.0044678  | 0.805114    | -1.24206 |
| Nos1ap   | Nos1ap-005   | 0.0135229  | 0.750028    | -1.33328 |
| Nostrin  | Nostrin-001  | 0.0349693  | 1.64354     | 1.64354  |
| Notch1   | Notch1-011   | 0.0267147  | 0.169989    | -5.88274 |
| Notch4   | Notch4-001   | 0.0390825  | 1.42591     | 1.42591  |
| Noxo1    | Noxo1-003    | 0.0381818  | 53.7172     | 53.7172  |
| Npas1    | Npas1-201    | 0.0252314  | 0.801475    | -1.2477  |
| Npepps   | Npepps-009   | 0.0424867  | 5.91913     | 5.91913  |
| Nploc4   | Nploc4-004   | 0.0484279  | 2.32138     | 2.32138  |
| Nprl2    | Nprl2-004    | 0.0453709  | 0.248682    | -4.0212  |

|        |            |             |             |              |
|--------|------------|-------------|-------------|--------------|
| Nprl3  | Nprl3-015  | 0.0483053   | 0.666122    | -1.50123     |
| Nr1h2  | Nr1h2-011  | 0.0476184   | 0.12587     | -7.94473     |
| Nr1h2  | Nr1h2-006  | 0.0366899   | 1.44147     | 1.44147      |
| Nr1h3  | Nr1h3-008  | 0.0416033   | 0.000451993 | -2212.42     |
| Nr1i2  | Nr1i2-001  | 0.000120962 | 7.26552     | 7.26552      |
| Nr2f2  | Nr2f2-001  | 0.0496995   | 0.638883    | -1.56523     |
| Nr2f6  | Nr2f6-007  | 0.0486185   | 157.491     | 157.491      |
| Nrf1   | Nrf1-204   | 0.0248207   | 0.0259592   | -38.522      |
| Nrg4   | Nrg4-006   | 0.04887     | 0.357273    | -2.79898     |
| Nrip3  | Nrip3-001  | 0.0302695   | 0.777209    | -1.28666     |
| Nrip3  | Nrip3-002  | 0.010247    | 0.821288    | -1.2176      |
| Nrxn1  | Nrxn1-021  | 0.02263     | 3.36216     | 3.36216      |
| Nrxn2  | Nrxn2-006  | 0.0106304   | 1.92154     | 1.92154      |
| Nrxn3  | Nrxn3-002  | 0.0177295   | 0.399294    | -2.50442     |
| Nsf    | Nsf-001    | 0.00241369  | 0.8864      | -1.12816     |
| Nsf    | Nsf-005    | 0.00885064  | 3.38842     | 3.38842      |
| Nsun5  | Nsun5-008  | 0.00501327  | 0.621241    | -1.60968     |
| Nsun6  | Nsun6-001  | 0.0169909   | 0.677156    | -1.47677     |
| Nsun6  | Nsun6-003  | 0.000838753 | 16.1528     | 16.1528      |
| Nt5c3  | Nt5c3-006  | 0.0477578   | 0.0977922   | -10.2258     |
| Nt5e   | Nt5e-002   | 0.0463166   | 1.63436     | 1.63436      |
| Ntpcr  | Ntpcr-002  | 0.0292215   | 1.46044     | 1.46044      |
| Ntrk2  | Ntrk2-202  | 0.00583065  | 1.11359     | 1.11359      |
| Ntrk3  | Ntrk3-001  | 0.0128734   | 0.877128    | -1.14009     |
| Nubp2  | Nubp2-201  | 0.0347721   | 0.893121    | -1.11967     |
| Nucb1  | Nucb1-006  | 0.0334419   | 8.1757e-05  | -12231.4     |
| Nudc   | Nudc-002   | 0.0320194   | 9.39409e-06 | -106450      |
| Nudc   | Nudc-001   | 0.0270629   | 1.07341     | 1.07341      |
| Nudt17 | Nudt17-003 | 0.0398773   | 0.489273    | -2.04385     |
| Nufip1 | Nufip1-201 | 0.0228371   | 0.894816    | -1.11755     |
| Numb   | Numb-004   | 0.026492    | 2.46636     | 2.46636      |
| Nup160 | Nup160-006 | 0.0272894   | 16.2935     | 16.2935      |
| Nup85  | Nup85-007  | 0.0256276   | 0.366181    | -2.73089     |
| Nup88  | Nup88-004  | 0.0334411   | 0.474869    | -2.10585     |
| Nup88  | Nup88-002  | 0.0431308   | 1.24413     | 1.24413      |
| Nupl2  | Nupl2-004  | 0.00923585  | 0.184806    | -5.41108     |
| Nupr1l | Nupr1l-004 | 0.00137431  | 7.04497e-08 | -1.41945e+07 |
| Nxpe3  | Nxpe3-201  | 0.00854286  | 0.868686    | -1.15116     |
| Nxt2   | Nxt2-001   | 0.0263222   | 0.813853    | -1.22872     |
| Oaz2   | Oaz2-001   | 0.0226272   | 1.13538     | 1.13538      |
| Obscn  | Obscn-202  | 0.0246299   | 2.91559     | 2.91559      |
| Obsl1  | Obsl1-014  | 0.032915    | 0.000751414 | -1330.82     |
| Odf2   | Odf2-017   | 0.014178    | 1.43192e-10 | -6.98364e+09 |



|          |              |             |             |              |
|----------|--------------|-------------|-------------|--------------|
| Odf2     | Odf2-019     | 0.041281    | 0.0393605   | -25.4062     |
| Odf2l    | Odf2l-013    | 0.00470602  | 53.6778     | 53.6778      |
| Ogdh     | Ogdh-006     | 0.00734388  | 6.29137     | 6.29137      |
| Ogfrl1   | Ogfrl1-001   | 0.0443777   | 0.892469    | -1.12049     |
| Ogfrl1   | Ogfrl1-003   | 0.0206073   | 0.306262    | -3.26517     |
| Olfr287  | Olfr287-004  | 0.00496573  | 2.41372e-05 | -41429.9     |
| Olfr61   | Olfr61-201   | 0.0400241   | 0.368438    | -2.71416     |
| Olfr658  | Olfr658-001  | 0.0327686   | 7.13524     | 7.13524      |
| Olig2    | Olig2-001    | 0.0335653   | 0.8617      | -1.1605      |
| Opcml    | Opcml-001    | 0.0375161   | 0.888717    | -1.12522     |
| Oplah    | Oplah-001    | 0.00393299  | 1.71234     | 1.71234      |
| Opn3     | Opn3-001     | 0.0182127   | 1.86993     | 1.86993      |
| Oprk1    | Oprk1-002    | 0.0379522   | 42754.8     | 42754.8      |
| Orc2     | Orc2-004     | 0.0356702   | 0.271057    | -3.68926     |
| Orc3     | Orc3-011     | 0.0278983   | 0.777134    | -1.28678     |
| Osbpl3   | Osbpl3-011   | 0.0372731   | 0.00933904  | -107.077     |
| Osbpl9   | Osbpl9-006   | 0.0346281   | 7.30075e+10 | 7.30075e+10  |
| Osgep    | Osgep-001    | 0.0440269   | 0.747679    | -1.33747     |
| Osgep11  | Osgep11-001  | 0.0181044   | 0.489177    | -2.04425     |
| Otop1    | Otop1-201    | 0.0114392   | 2.36017e-09 | -4.23698e+08 |
| Otop1    | Otop1-202    | 0.0114392   | 2.36017e-09 | -4.23698e+08 |
| Otop1    | Otop1-001    | 0.0114392   | 2.36017e-09 | -4.23698e+08 |
| Otud4    | Otud4-001    | 0.0434553   | 1.34349     | 1.34349      |
| Otud5    | Otud5-004    | 0.0356893   | 1.3107      | 1.3107       |
| Otud7b   | Otud7b-001   | 0.00471122  | 1.28059     | 1.28059      |
| Otx2     | Otx2-001     | 0.0450489   | 8.27525     | 8.27525      |
| Oxsm     | Oxsm-001     | 0.0113002   | 0.733979    | -1.36244     |
| P2rx7    | P2rx7-008    | 0.0064713   | 0.00510562  | -195.862     |
| P2ry1    | P2ry1-003    | 0.0272818   | 5.67094     | 5.67094      |
| P3h1     | P3h1-007     | 0.0136576   | 2.32954     | 2.32954      |
| P4ha1    | P4ha1-003    | 0.0217992   | 1.35972     | 1.35972      |
| P4htm    | P4htm-003    | 0.0292147   | 0.723145    | -1.38285     |
| Pabpc4l  | Pabpc4l-002  | 0.0448953   | 132.143     | 132.143      |
| Pabpc5   | Pabpc5-001   | 0.0104597   | 0.695866    | -1.43706     |
| Pacsin1  | Pacsin1-002  | 0.0236048   | 0.718087    | -1.39259     |
| Pafah1b1 | Pafah1b1-002 | 0.0071485   | 0.89827     | -1.11325     |
| Pafah1b1 | Pafah1b1-005 | 0.0033208   | 2.57263     | 2.57263      |
| Pafah1b3 | Pafah1b3-007 | 0.00880915  | 2.16303     | 2.16303      |
| Pafah2   | Pafah2-002   | 0.000714951 | 16.2015     | 16.2015      |
| Pak3     | Pak3-201     | 0.000672292 | 0.730399    | -1.36911     |
| Pak3     | Pak3-005     | 0.000672196 | 0.730409    | -1.3691      |
| Pak3     | Pak3-002     | 0.0148329   | 0.639157    | -1.56456     |
| Pak3     | Pak3-008     | 0.022263    | 1.31527     | 1.31527      |

|         |             |             |             |              |
|---------|-------------|-------------|-------------|--------------|
| Pald1   | Pald1-201   | 0.00690152  | 0.846823    | -1.18088     |
| Palld   | Palld-004   | 0.00102822  | 0.277752    | -3.60033     |
| Palm    | Palm-201    | 0.0203852   | 0.742507    | -1.34679     |
| Palm    | Palm-202    | 0.0340718   | 1.09965     | 1.09965      |
| Palm2   | Palm2-004   | 0.00076058  | 0.557012    | -1.79529     |
| Palmd   | Palmd-003   | 0.0336107   | 5.63037     | 5.63037      |
| Panct2  | Panct2-001  | 0.0313947   | 0.791839    | -1.26288     |
| Pank2   | Pank2-007   | 0.0202008   | 3.6034      | 3.6034       |
| Papd5   | Papd5-201   | 0.0122395   | 1.44679     | 1.44679      |
| Papd5   | Papd5-003   | 0.0377196   | 2.49962     | 2.49962      |
| Pard3   | Pard3-014   | 0.000205247 | 3.08881     | 3.08881      |
| Pard3b  | Pard3b-002  | 0.0416161   | 16.1599     | 16.1599      |
| Pard6b  | Pard6b-001  | 0.00202545  | 1.70775     | 1.70775      |
| Park2   | Park2-201   | 0.0412851   | 6.23776e-09 | -1.60314e+08 |
| Parl    | Parl-008    | 0.00429928  | 1.72003     | 1.72003      |
| Parp11  | Parp11-004  | 0.0384914   | 122.296     | 122.296      |
| Parp4   | Parp4-001   | 0.0349961   | 1.3528      | 1.3528       |
| Parvg   | Parvg-005   | 0.0306248   | 5.31996e-08 | -1.87971e+07 |
| Pax6    | Pax6-011    | 0.0351103   | 0.270968    | -3.69048     |
| Pax6    | Pax6-026    | 0.0338408   | 12.608      | 12.608       |
| Pbrm1   | Pbrm1-015   | 0.033009    | 0.347068    | -2.88128     |
| Pbrm1   | Pbrm1-011   | 0.0283885   | 1.88695     | 1.88695      |
| Pcbp3   | Pcbp3-201   | 0.047688    | 1.61527     | 1.61527      |
| Pcbp4   | Pcbp4-005   | 0.00326006  | 0.18297     | -5.46538     |
| Pcbp4   | Pcbp4-012   | 0.000471347 | 2.41154     | 2.41154      |
| Pcbp4   | Pcbp4-008   | 0.0405964   | 2.1538      | 2.1538       |
| Pcdh15  | Pcdh15-033  | 0.0461128   | 2.97094e-07 | -3.36594e+06 |
| Pcdh15  | Pcdh15-037  | 0.0211486   | 0.0708115   | -14.122      |
| Pcdh15  | Pcdh15-039  | 0.0456425   | 0.00132224  | -756.294     |
| Pcdha11 | Pcdha11-005 | 0.0138928   | 42.7098     | 42.7098      |
| Pcdhb17 | Pcdhb17-001 | 0.0395131   | 0.910012    | -1.09889     |
| Pced1a  | Pced1a-006  | 0.0168351   | 0.648647    | -1.54167     |
| Pced1a  | Pced1a-005  | 0.0134187   | 1.40511     | 1.40511      |
| Pcgf1   | Pcgf1-201   | 0.00847006  | 0.214882    | -4.65372     |
| Pcgf2   | Pcgf2-003   | 0.0155434   | 3.07648     | 3.07648      |
| Pcgf3   | Pcgf3-001   | 0.0065673   | 1.14056     | 1.14056      |
| Pcnp    | Pcnp-006    | 0.0440091   | 3.29841e-05 | -30317.6     |
| Pcnp    | Pcnp-003    | 0.0214085   | 2.81966     | 2.81966      |
| Pcp2    | Pcp2-005    | 0.0152872   | 17.0023     | 17.0023      |
| Pcp4    | Pcp4-001    | 0.0399686   | 1.56691     | 1.56691      |
| Pcp4l1  | Pcp4l1-001  | 0.0336301   | 2.0821      | 2.0821       |
| Pcsk7   | Pcsk7-201   | 0.00904295  | 1.13889     | 1.13889      |
| Pcyox1  | Pcyox1-002  | 0.0086957   | 0.0402334   | -24.855      |

|         |             |             |             |              |
|---------|-------------|-------------|-------------|--------------|
| Pcyt1a  | Pcyt1a-002  | 0.0428057   | 1.89818     | 1.89818      |
| Pdcl3   | Pdcl3-001   | 0.0488016   | 1.36206     | 1.36206      |
| Pdcl3   | Pdcl3-004   | 0.00111878  | 1.29445     | 1.29445      |
| Pde10a  | Pde10a-005  | 0.0320112   | 17.4851     | 17.4851      |
| Pde11a  | Pde11a-002  | 0.0396545   | 0.199066    | -5.02345     |
| Pde1a   | Pde1a-009   | 0.00318627  | 0.634478    | -1.5761      |
| Pde1a   | Pde1a-002   | 0.0168338   | 0.645083    | -1.55019     |
| Pde3b   | Pde3b-002   | 0.0166778   | 183129      | 183129       |
| Pde4b   | Pde4b-012   | 0.0180944   | 2.09436     | 2.09436      |
| Pde8b   | Pde8b-001   | 0.0372056   | 0.721443    | -1.38611     |
| Pdk4    | Pdk4-001    | 0.00503333  | 1.22889     | 1.22889      |
| Pdlim4  | Pdlim4-001  | 0.0112684   | 1.55455     | 1.55455      |
| Pdlim4  | Pdlim4-002  | 0.00129037  | 2.94672     | 2.94672      |
| Pdp1    | Pdp1-001    | 0.0239185   | 1.31404     | 1.31404      |
| Pdp1    | Pdp1-002    | 0.0411943   | 1.48999     | 1.48999      |
| Pdp2    | Pdp2-201    | 0.0148672   | 1.18284     | 1.18284      |
| Pdrg1   | Pdrg1-005   | 0.0419452   | 34.7929     | 34.7929      |
| Pds5a   | Pds5a-006   | 0.0487927   | 1.45559     | 1.45559      |
| Pds5b   | Pds5b-006   | 0.0264543   | 1.58917     | 1.58917      |
| Pdss2   | Pdss2-001   | 0.0151748   | 0.859008    | -1.16413     |
| Pdss2   | Pdss2-005   | 0.0378193   | 6.51752     | 6.51752      |
| Pdxk    | Pdxk-001    | 0.0375348   | 1.14246     | 1.14246      |
| Pdzd11  | Pdzd11-003  | 0.0162467   | 1.72864     | 1.72864      |
| Pdzd2   | Pdzd2-004   | 0.0178806   | 1.32242     | 1.32242      |
| Pdzd2   | Pdzd2-011   | 0.0345263   | 6.06307     | 6.06307      |
| Peak1os | Peak1os-001 | 0.0142957   | 0.456133    | -2.19234     |
| Peli1   | Peli1-001   | 0.0300292   | 0.926559    | -1.07926     |
| Pelp1   | Pelp1-002   | 0.0241174   | 1.83449e-08 | -5.45109e+07 |
| Pelp1   | Pelp1-001   | 0.0245531   | 1.06912     | 1.06912      |
| Per2    | Per2-001    | 0.0124539   | 1.34389     | 1.34389      |
| Pet117  | Pet117-001  | 3.90527e-05 | 59.5237     | 59.5237      |
| Pex1    | Pex1-003    | 0.00849746  | 2.26337     | 2.26337      |
| Pex1    | Pex1-009    | 0.0212184   | 1.49537     | 1.49537      |
| Pex11b  | Pex11b-006  | 0.0351663   | 0.486318    | -2.05627     |
| Pex11b  | Pex11b-005  | 0.0342858   | 3.57117     | 3.57117      |
| Pex12   | Pex12-002   | 0.0240956   | 1.73929     | 1.73929      |
| Pex5    | Pex5-002    | 0.0465793   | 1.59818     | 1.59818      |
| Pex5l   | Pex5l-005   | 0.0141152   | 1.71195     | 1.71195      |
| Pex7    | Pex7-201    | 0.0250429   | 0.327653    | -3.05201     |
| Pfas    | Pfas-003    | 0.0285332   | 912.38      | 912.38       |
| Pfkfb2  | Pfkfb2-005  | 0.00832539  | 0.702565    | -1.42336     |
| Pfkfb3  | Pfkfb3-003  | 0.0387001   | 0.387443    | -2.58102     |
| Pfkfb3  | Pfkfb3-002  | 0.0391185   | 1.65164     | 1.65164      |

|          |              |             |             |              |
|----------|--------------|-------------|-------------|--------------|
| Pfkp     | Pfkp-013     | 0.0494996   | 16.5914     | 16.5914      |
| Pgap2    | Pgap2-024    | 0.00728267  | 12.8728     | 12.8728      |
| Pgap3    | Pgap3-003    | 0.00183894  | 0.25256     | -3.95946     |
| Pgbd1    | Pgbd1-003    | 0.0416508   | 8825.05     | 8825.05      |
| Pgbd5    | Pgbd5-004    | 0.0158469   | 0.148671    | -6.72625     |
| Phactr1  | Phactr1-010  | 0.0225659   | 6.62923e-10 | -1.50847e+09 |
| Phactr1  | Phactr1-005  | 0.0221786   | 0.507822    | -1.96919     |
| Phactr1  | Phactr1-004  | 0.0432608   | 1.7087      | 1.7087       |
| Phc1     | Phc1-013     | 0.00979896  | 1.4684e-11  | -6.81014e+10 |
| Phc2     | Phc2-003     | 0.000106486 | 7.46128     | 7.46128      |
| Phf10    | Phf10-005    | 0.035864    | 2.99982     | 2.99982      |
| Phf14    | Phf14-005    | 0.017648    | 0.0098524   | -101.498     |
| Phf20    | Phf20-007    | 0.0309254   | 4.79454     | 4.79454      |
| Phf21a   | Phf21a-001   | 0.00894344  | 2.34561     | 2.34561      |
| Phf21b   | Phf21b-003   | 0.0333714   | 3.92988     | 3.92988      |
| Phf24    | Phf24-007    | 0.0439279   | 1.53627     | 1.53627      |
| Phip     | Phip-011     | 0.00363305  | 3.67224     | 3.67224      |
| Phka1    | Phka1-006    | 0.0259058   | 0.128254    | -7.79702     |
| Phka1    | Phka1-001    | 0.0239592   | 0.746064    | -1.34037     |
| Phkg1    | Phkg1-005    | 0.0491903   | 0.610614    | -1.6377      |
| Phlda1   | Phlda1-002   | 0.026519    | 2.47599     | 2.47599      |
| Phospho1 | Phospho1-003 | 0.0387516   | 0.0745546   | -13.413      |
| Phrf1    | Phrf1-008    | 0.0483234   | 0.0171675   | -58.2497     |
| Phtf1    | Phtf1-001    | 0.0448569   | 0.350161    | -2.85583     |
| Phtf1    | Phtf1-005    | 0.0469456   | 1.29833     | 1.29833      |
| Phtf1    | Phtf1-004    | 0.0404187   | 1.38932     | 1.38932      |
| Phyhd1   | Phyhd1-008   | 0.0128471   | 2.49557     | 2.49557      |
| Pi16     | Pi16-001     | 0.0319939   | 0.216766    | -4.61326     |
| Pi4ka    | Pi4ka-004    | 0.013048    | 0.00287079  | -348.336     |
| Pi4ka    | Pi4ka-010    | 0.0209063   | 1.49103     | 1.49103      |
| Pid1     | Pid1-001     | 0.0215922   | 1.19461     | 1.19461      |
| Piezo1   | Piezo1-007   | 0.00546597  | 10.9694     | 10.9694      |
| Pigf     | Pigf-001     | 0.00386722  | 0.795799    | -1.2566      |
| Pigk     | Pigk-006     | 0.0250802   | 0.744839    | -1.34257     |
| Pigq     | Pigq-013     | 0.00144717  | 0.601549    | -1.66237     |
| Pigr     | Pigr-001     | 0.0406567   | 0.231062    | -4.32784     |
| Pigt     | Pigt-002     | 0.00635728  | 1.94313     | 1.94313      |
| Pigu     | Pigu-002     | 0.00214218  | 0.290161    | -3.44636     |
| Pigu     | Pigu-201     | 0.009797    | 2.23486     | 2.23486      |
| Pigu     | Pigu-003     | 0.0375688   | 1.46001     | 1.46001      |
| Pigx     | Pigx-004     | 0.0146561   | 0.0263647   | -37.9296     |
| Pik3c2b  | Pik3c2b-001  | 0.0476559   | 1.22915     | 1.22915      |
| Pik3cb   | Pik3cb-001   | 0.0130385   | 0.714857    | -1.39888     |

|         |             |             |             |              |
|---------|-------------|-------------|-------------|--------------|
| Pik3cd  | Pik3cd-001  | 0.0347135   | 0.46459     | -2.15244     |
| Pik3ip1 | Pik3ip1-004 | 0.0428922   | 0.188569    | -5.30311     |
| Pik3r1  | Pik3r1-001  | 0.0134053   | 1.10316     | 1.10316      |
| Pik3r4  | Pik3r4-011  | 0.0147382   | 854.395     | 854.395      |
| Pikfyve | Pikfyve-007 | 0.0398978   | 831.588     | 831.588      |
| Pilra   | Pilra-001   | 0.00634038  | 0.231902    | -4.31216     |
| Pim1    | Pim1-001    | 0.01174     | 1.47388     | 1.47388      |
| Pip4k2b | Pip4k2b-002 | 0.0420929   | 1.97924     | 1.97924      |
| Pisd    | Pisd-006    | 0.00983966  | 0.0656575   | -15.2306     |
| Pja1    | Pja1-201    | 0.0194904   | 0.877602    | -1.13947     |
| Pja1    | Pja1-002    | 0.00674934  | 1.73784     | 1.73784      |
| Pja2    | Pja2-002    | 0.0126683   | 0.884714    | -1.13031     |
| Pkdrej  | Pkdrej-201  | 0.000413365 | 0.494702    | -2.02142     |
| Pkib    | Pkib-003    | 0.0128101   | 2.6118e-07  | -3.82878e+06 |
| Pkib    | Pkib-011    | 0.0327921   | 81.7573     | 81.7573      |
| Pkmyt1  | Pkmyt1-201  | 0.0492842   | 1.52847     | 1.52847      |
| Pkn1    | Pkn1-009    | 0.00876591  | 0.268036    | -3.73085     |
| Pkn2    | Pkn2-008    | 0.0382152   | 0.00941907  | -106.168     |
| Pkn3    | Pkn3-004    | 0.0455606   | 4.59111     | 4.59111      |
| Pkn3    | Pkn3-003    | 0.0469889   | 2766.03     | 2766.03      |
| Pknox1  | Pknox1-001  | 0.0363344   | 1.24774     | 1.24774      |
| Pknox2  | Pknox2-201  | 0.0124662   | 1.59056     | 1.59056      |
| Pkp3    | Pkp3-001    | 0.0335441   | 10.0656     | 10.0656      |
| Pkp3    | Pkp3-002    | 0.0335441   | 10.0656     | 10.0656      |
| Pla2g16 | Pla2g16-002 | 0.0366297   | 1.32757     | 1.32757      |
| Pla2g16 | Pla2g16-001 | 0.0339376   | 1.14739     | 1.14739      |
| Pla2g4e | Pla2g4e-002 | 0.0293096   | 0.324329    | -3.08329     |
| Pla2g5  | Pla2g5-004  | 0.032332    | 6.36513e-05 | -15710.6     |
| Pla2g6  | Pla2g6-004  | 0.0269036   | 0.38717     | -2.58284     |
| Pla2g7  | Pla2g7-001  | 0.0374619   | 0.904426    | -1.10567     |
| Platr14 | Platr14-004 | 0.00652207  | 5.03749e-09 | -1.98511e+08 |
| Plcb4   | Plcb4-003   | 0.0281029   | 1.41157     | 1.41157      |
| Plch1   | Plch1-005   | 0.0454726   | 0.275252    | -3.63303     |
| Plch1   | Plch1-002   | 0.0139598   | 2.0969      | 2.0969       |
| Plch2   | Plch2-002   | 0.0431877   | 0.686042    | -1.45764     |
| Plcd1   | Plcd1-003   | 0.0188945   | 2.24114     | 2.24114      |
| Plek2   | Plek2-001   | 0.0114129   | 3.78882     | 3.78882      |
| Plekha1 | Plekha1-007 | 0.00143434  | 3.30604e-12 | -3.02476e+11 |
| Plekha4 | Plekha4-005 | 0.0377693   | 0.0770911   | -12.9717     |
| Plekha5 | Plekha5-002 | 0.0219128   | 68.8502     | 68.8502      |
| Plekha1 | Plekha1-009 | 0.0422875   | 2.97444     | 2.97444      |
| Plekha2 | Plekha2-005 | 0.0299117   | 222.828     | 222.828      |
| Plekha3 | Plekha3-201 | 0.0264568   | 1.32679     | 1.32679      |

|           |               |             |             |          |
|-----------|---------------|-------------|-------------|----------|
| Plekhg4   | Plekhg4-002   | 0.0316145   | 0.000138006 | -7246.05 |
| Plekhg5   | Plekhg5-006   | 0.0425634   | 0.31989     | -3.12608 |
| Plekhs1   | Plekhs1-201   | 0.0338581   | 2.21361     | 2.21361  |
| Plin3     | Plin3-201     | 0.00230479  | 1.23258     | 1.23258  |
| Plod3     | Plod3-001     | 0.0367851   | 1.082       | 1.082    |
| Plod3     | Plod3-003     | 0.0259858   | 2.12715     | 2.12715  |
| Plp1      | Plp1-003      | 0.0276845   | 1.25113     | 1.25113  |
| Pls3      | Pls3-005      | 0.0301322   | 0.8347      | -1.19804 |
| Plxna4    | Plxna4-001    | 0.0354103   | 0.882056    | -1.13371 |
| Plxna4os1 | Plxna4os1-001 | 0.000495854 | 0.0702944   | -14.2259 |
| Pmepa1    | Pmepa1-001    | 0.0438158   | 1.27001     | 1.27001  |
| Pmf1      | Pmf1-004      | 0.00464277  | 0.000324998 | -3076.94 |
| Pmpca     | Pmpca-004     | 0.0444146   | 0.417927    | -2.39276 |
| Pms2      | Pms2-001      | 0.0462312   | 0.659507    | -1.51628 |
| Pnck      | Pnck-004      | 0.0462202   | 0.705772    | -1.41689 |
| Pnlsr     | Pnlsr-008     | 0.0335762   | 0.088146    | -11.3448 |
| Pnkp      | Pnkp-003      | 0.0479179   | 0.63028     | -1.5866  |
| Pnkp      | Pnkp-004      | 0.0333338   | 6.52775     | 6.52775  |
| Poc1a     | Poc1a-001     | 0.0396905   | 0.688576    | -1.45227 |
| Poglut1   | Poglut1-003   | 0.0440797   | 0.110324    | -9.0642  |
| Pogz      | Pogz-007      | 0.0110413   | 2.40883     | 2.40883  |
| Pola1     | Pola1-001     | 0.0202552   | 1.21093     | 1.21093  |
| Pold1     | Pold1-001     | 0.0137984   | 0.361605    | -2.76545 |
| Pold3     | Pold3-008     | 0.0308386   | 1.54683e-06 | -646485  |
| Pold3     | Pold3-001     | 0.0311578   | 1.14193     | 1.14193  |
| Polg      | Polg-016      | 0.0235665   | 12.6229     | 12.6229  |
| Polq      | Polq-004      | 0.0254839   | 0.19335     | -5.17197 |
| Polr1a    | Polr1a-006    | 0.0046839   | 7.7871      | 7.7871   |
| Polr1d    | Polr1d-006    | 0.0282567   | 0.249288    | -4.01142 |
| Polr1e    | Polr1e-002    | 0.0459611   | 0.470151    | -2.12698 |
| Polr2e    | Polr2e-004    | 0.0443073   | 4.34996     | 4.34996  |
| Polr3d    | Polr3d-202    | 0.0402922   | 2.5732      | 2.5732   |
| Pomgnt1   | Pomgnt1-005   | 0.0176765   | 3.46874     | 3.46874  |
| Pomgnt1   | Pomgnt1-001   | 0.0351102   | 1.30123     | 1.30123  |
| Pomk      | Pomk-201      | 0.0390143   | 0.908494    | -1.10072 |
| Pomt1     | Pomt1-009     | 0.00707776  | 2.96693     | 2.96693  |
| Pon2      | Pon2-001      | 0.00658315  | 1.2831      | 1.2831   |
| Popdc2    | Popdc2-003    | 0.010385    | 0.00636625  | -157.078 |
| Porcn     | Porcn-003     | 0.0373585   | 0.876643    | -1.14072 |
| Postn     | Postn-004     | 0.0272209   | 13.63       | 13.63    |
| Pou2f1    | Pou2f1-006    | 0.0277231   | 485.828     | 485.828  |
| Pou3f2    | Pou3f2-001    | 0.0264526   | 1.27396     | 1.27396  |
| Pou4f1    | Pou4f1-001    | 0.0229789   | 5.44446     | 5.44446  |

|            |                |             |             |          |
|------------|----------------|-------------|-------------|----------|
| Ppap2a     | Ppap2a-202     | 0.000127615 | 1.60413     | 1.60413  |
| Ppara      | Ppara-003      | 0.0181358   | 17.3392     | 17.3392  |
| Ppard      | Ppard-002      | 0.0324647   | 2.12064     | 2.12064  |
| Ppdpf      | Ppdpf-004      | 0.0284641   | 0.724538    | -1.38019 |
| Ppfia2     | Ppfia2-201     | 0.0280161   | 0.848353    | -1.17875 |
| Ppie       | Ppie-003       | 0.0321604   | 0.390297    | -2.56215 |
| Ppm1e      | Ppm1e-001      | 0.0381578   | 0.878953    | -1.13772 |
| Ppp1r12c   | Ppp1r12c-007   | 0.0362586   | 1.808       | 1.808    |
| Ppp1r13l   | Ppp1r13l-001   | 0.0459924   | 1.37946     | 1.37946  |
| Ppp1r15b   | Ppp1r15b-001   | 0.0397377   | 1.14363     | 1.14363  |
| Ppp1r17    | Ppp1r17-001    | 0.0107689   | 2.72734     | 2.72734  |
| Ppp1r18    | Ppp1r18-004    | 0.0374546   | 1.80192     | 1.80192  |
| Ppp1r1b    | Ppp1r1b-007    | 0.0117583   | 101.239     | 101.239  |
| Ppp1r1b    | Ppp1r1b-002    | 0.0238482   | 18.962      | 18.962   |
| Ppp1r21    | Ppp1r21-005    | 0.0433398   | 8.45562e-05 | -11826.5 |
| Ppp1r35    | Ppp1r35-003    | 0.0286416   | 1.92954     | 1.92954  |
| Ppp1r37    | Ppp1r37-201    | 0.015832    | 1.09898     | 1.09898  |
| Ppp1r3f    | Ppp1r3f-004    | 0.0469537   | 2.40789     | 2.40789  |
| Ppp1r9a    | Ppp1r9a-003    | 0.0360446   | 0.266651    | -3.75022 |
| Ppp2r1b    | Ppp2r1b-001    | 0.0192336   | 1.53183     | 1.53183  |
| Ppp2r1b    | Ppp2r1b-002    | 0.022868    | 1.16277     | 1.16277  |
| Ppp2r3a    | Ppp2r3a-001    | 0.0327719   | 0.884762    | -1.13025 |
| Ppp2r5e    | Ppp2r5e-201    | 0.0498      | 0.940957    | -1.06275 |
| Ppp4r1     | Ppp4r1-010     | 0.0128178   | 0.176881    | -5.65352 |
| Ppp4r1l-ps | Ppp4r1l-ps-004 | 0.00880422  | 720.016     | 720.016  |
| Ppp4r2     | Ppp4r2-003     | 0.00290032  | 1.67911     | 1.67911  |
| Pprc1      | Pprc1-004      | 0.0196111   | 1.49121     | 1.49121  |
| Pqlc1      | Pqlc1-008      | 0.0260917   | 0.430134    | -2.32486 |
| Pqlc1      | Pqlc1-004      | 0.0218271   | 3.1255      | 3.1255   |
| Pqlc3      | Pqlc3-001      | 0.00123345  | 9.09        | 9.09     |
| Prc1       | Prc1-012       | 0.0246853   | 0.472472    | -2.11653 |
| Prc1       | Prc1-005       | 0.0348504   | 0.139268    | -7.18041 |
| Prdx1      | Prdx1-003      | 0.0288075   | 1.48379     | 1.48379  |
| Prdx2      | Prdx2-007      | 0.00201898  | 0.625711    | -1.59818 |
| Prdx2      | Prdx2-201      | 0.0117683   | 1.23854     | 1.23854  |
| Prdx4      | Prdx4-001      | 0.0153786   | 1.28188     | 1.28188  |
| Preb       | Preb-007       | 0.0395212   | 1.96348     | 1.96348  |
| Prex1      | Prex1-008      | 0.00612443  | 4.47874     | 4.47874  |
| Prg4       | Prg4-201       | 0.00337855  | 0.0308713   | -32.3926 |
| Prickle3   | Prickle3-002   | 0.00815503  | 2.9218      | 2.9218   |
| Prim2      | Prim2-002      | 0.0323363   | 7.79046     | 7.79046  |
| Prkar1a    | Prkar1a-001    | 0.0205224   | 0.922246    | -1.08431 |
| Prkar2b    | Prkar2b-003    | 0.0262857   | 2.00902     | 2.00902  |

|          |              |             |             |              |
|----------|--------------|-------------|-------------|--------------|
| Prkcd    | Prkcd-202    | 0.0464102   | 1.96776     | 1.96776      |
| Prkd1    | Prkd1-201    | 0.0437921   | 0.869117    | -1.15059     |
| Prkx     | Prkx-001     | 0.000170808 | 1.31863     | 1.31863      |
| Prlr     | Prlr-009     | 0.0297146   | 9339.31     | 9339.31      |
| Prlr     | Prlr-008     | 0.0276969   | 4.74562     | 4.74562      |
| Prmt2    | Prmt2-003    | 0.0248323   | 1.72564     | 1.72564      |
| Prmt5    | Prmt5-003    | 0.0453797   | 0.128239    | -7.79797     |
| Prmt6    | Prmt6-001    | 0.027584    | 0.692605    | -1.44383     |
| Prmt7    | Prmt7-001    | 0.0384725   | 0.90578     | -1.10402     |
| Prnp     | Prnp-001     | 0.0325203   | 0.918458    | -1.08878     |
| Proser3  | Proser3-002  | 0.00973812  | 2.56987     | 2.56987      |
| Prpf38b  | Prpf38b-006  | 0.00311271  | 1.46228     | 1.46228      |
| Prpf39   | Prpf39-001   | 0.0144418   | 0.863362    | -1.15826     |
| Prpf40b  | Prpf40b-015  | 0.0199412   | 0.6624      | -1.50966     |
| Prpf40b  | Prpf40b-003  | 0.0441753   | 1.45666     | 1.45666      |
| Prpsap2  | Prpsap2-002  | 0.0359244   | 0.52456     | -1.90636     |
| Prr22    | Prr22-002    | 0.0355559   | 1.22491e-08 | -8.1639e+07  |
| Prr3     | Prr3-001     | 0.0172925   | 1.93483     | 1.93483      |
| Prr36    | Prr36-002    | 0.035711    | 0.298493    | -3.35017     |
| Prrc2c   | Prrc2c-009   | 0.0365008   | 1.50387     | 1.50387      |
| Prrg4    | Prrg4-001    | 0.0352298   | 2.43907     | 2.43907      |
| Prrx2    | Prrx2-003    | 0.0394774   | 5.91433e-08 | -1.69081e+07 |
| Prss41   | Prss41-002   | 0.0391986   | 0.411795    | -2.42839     |
| Prtg     | Prtg-001     | 0.0488845   | 0.777113    | -1.28681     |
| Psd2     | Psd2-005     | 0.0168367   | 1.44546     | 1.44546      |
| Psd4     | Psd4-009     | 0.000295378 | 8.94751     | 8.94751      |
| Psen2    | Psen2-001    | 0.0241032   | 1.52083     | 1.52083      |
| Psm7     | Psm7-005     | 0.0265311   | 0.692611    | -1.44381     |
| Psm9     | Psm9-004     | 0.0149453   | 0.039709    | -25.1832     |
| Psmc3ip  | Psmc3ip-004  | 0.0269567   | 0.355579    | -2.81232     |
| Psm11    | Psm11-013    | 0.0488809   | 5.42983     | 5.42983      |
| Psm1     | Psm1-012     | 0.00605413  | 1.83971     | 1.83971      |
| Psmf1    | Psmf1-003    | 0.023126    | 1.42354     | 1.42354      |
| Psmg4    | Psmg4-002    | 0.0102675   | 2.97734     | 2.97734      |
| Psors1c2 | Psors1c2-001 | 0.0197288   | 0.157616    | -6.34453     |
| Pstpip2  | Pstpip2-201  | 0.000700447 | 0.770363    | -1.29809     |
| Ptcd3    | Ptcd3-001    | 0.00031314  | 0.854352    | -1.17048     |
| Ptch1    | Ptch1-004    | 0.0326159   | 0.000123784 | -8078.57     |
| Ptch1    | Ptch1-005    | 0.0068255   | 1.21934     | 1.21934      |
| Pter     | Pter-001     | 0.00954165  | 0.834524    | -1.19829     |
| Ptges3   | Ptges3-002   | 0.0472776   | 0.704512    | -1.41942     |
| Ptgfrn   | Ptgfrn-001   | 0.00499435  | 1.47969     | 1.47969      |
| Ptgs2    | Ptgs2-001    | 0.025837    | 0.719628    | -1.38961     |



|         |             |             |             |              |
|---------|-------------|-------------|-------------|--------------|
| Pth1r   | Pth1r-201   | 0.0403898   | 0.356135    | -2.80792     |
| Ptk2    | Ptk2-201    | 0.0217065   | 0.911522    | -1.09707     |
| Ptma    | Ptma-003    | 0.0482575   | 0.375637    | -2.66215     |
| Ptn     | Ptn-001     | 0.00167879  | 1.12252     | 1.12252      |
| Ptpn12  | Ptpn12-007  | 0.0373819   | 5.34745e-05 | -18700.5     |
| Ptpn4   | Ptpn4-011   | 0.0494644   | 0.0448951   | -22.2742     |
| Ptprf   | Ptprf-006   | 0.000781374 | 9.80768     | 9.80768      |
| Ptprg   | Ptprg-001   | 0.0316983   | 0.884199    | -1.13097     |
| Ptprh   | Ptprh-003   | 0.0416385   | 1.89161e+08 | 1.89161e+08  |
| Ptprr   | Ptprr-001   | 0.0483746   | 0.792291    | -1.26216     |
| Ptprr   | Ptprr-007   | 0.0066189   | 2.53667     | 2.53667      |
| Ptprs   | Ptprs-002   | 0.0406776   | 0.935332    | -1.06914     |
| Ptrh1   | Ptrh1-003   | 0.00512086  | 0.0982989   | -10.1731     |
| Ptrh1   | Ptrh1-001   | 0.0136353   | 2.12591     | 2.12591      |
| Pttg1   | Pttg1-003   | 0.0118219   | 1.93928     | 1.93928      |
| Pttg1ip | Pttg1ip-001 | 0.00155813  | 1.18174     | 1.18174      |
| Puf60   | Puf60-201   | 0.0408279   | 1.23281     | 1.23281      |
| Pum1    | Pum1-001    | 0.0108925   | 0.849856    | -1.17667     |
| Pum2    | Pum2-007    | 0.0306447   | 7.56605e-05 | -13216.9     |
| Pus1    | Pus1-006    | 0.00199152  | 0.0116077   | -86.1494     |
| Pus10   | Pus10-002   | 0.0131371   | 0.363561    | -2.75057     |
| Pus3    | Pus3-003    | 0.033454    | 1.4761      | 1.4761       |
| Pvrl3   | Pvrl3-002   | 0.0211307   | 0.802398    | -1.24627     |
| Pvrl4   | Pvrl4-002   | 0.0356532   | 0.82974     | -1.2052      |
| Pvt1    | Pvt1-001    | 0.0234716   | 0.454759    | -2.19897     |
| Pwwp2a  | Pwwp2a-004  | 0.0455769   | 0.730419    | -1.36908     |
| Pwwp2a  | Pwwp2a-003  | 0.00488192  | 2.72617     | 2.72617      |
| Pycard  | Pycard-002  | 0.0440262   | 1.69931     | 1.69931      |
| Pyroxd1 | Pyroxd1-004 | 0.0307692   | 0.714869    | -1.39886     |
| Pyroxd1 | Pyroxd1-002 | 0.0420377   | 1.74924     | 1.74924      |
| Pzp     | Pzp-003     | 0.00569749  | 0.101205    | -9.88089     |
| Qars    | Qars-006    | 0.0302592   | 0.00898928  | -111.244     |
| Qdpr    | Qdpr-006    | 0.0473754   | 1.31911     | 1.31911      |
| Qrich1  | Qrich1-007  | 0.0453281   | 0.545652    | -1.83267     |
| Qrich1  | Qrich1-008  | 0.0356038   | 0.205258    | -4.87192     |
| Qrsl1   | Qrsl1-003   | 0.0141001   | 0.399992    | -2.50005     |
| R3hcc1  | R3hcc1-002  | 0.0250574   | 0.671102    | -1.49009     |
| R3hcc1  | R3hcc1-001  | 0.0155334   | 1.38872     | 1.38872      |
| R3hdm1  | R3hdm1-009  | 0.00252059  | 1.32781     | 1.32781      |
| Rab10os | Rab10os-010 | 0.0167098   | 0.27283     | -3.66529     |
| Rab13   | Rab13-001   | 0.0381586   | 1.30221     | 1.30221      |
| Rab14   | Rab14-003   | 0.0355346   | 6.56583e-08 | -1.52304e+07 |
| Rab15   | Rab15-001   | 0.0308291   | 1.107       | 1.107        |

|            |                |             |            |          |
|------------|----------------|-------------|------------|----------|
| Rab22a     | Rab22a-002     | 0.0233748   | 1.53128    | 1.53128  |
| Rab23      | Rab23-007      | 0.00347474  | 1.84227    | 1.84227  |
| Rab30      | Rab30-003      | 0.0236359   | 6.4693     | 6.4693   |
| Rab39b     | Rab39b-001     | 0.0116291   | 0.881897   | -1.13392 |
| Rab3d      | Rab3d-005      | 0.0282604   | 17.6195    | 17.6195  |
| Rab40c     | Rab40c-201     | 0.00839125  | 1.95837    | 1.95837  |
| Rab43      | Rab43-201      | 0.0321941   | 2.33802    | 2.33802  |
| Rab8a      | Rab8a-001      | 0.0446424   | 1.06164    | 1.06164  |
| Rabepk     | Rabepk-006     | 0.0342419   | 0.627325   | -1.59407 |
| Rabgap1l   | Rabgap1l-003   | 0.0310704   | 0.924197   | -1.08202 |
| Rabgef1    | Rabgef1-006    | 0.0315282   | 1.89198    | 1.89198  |
| Racgap1    | Racgap1-005    | 0.000551064 | 8.56289    | 8.56289  |
| Rad51ap1   | Rad51ap1-001   | 0.00877026  | 0.545506   | -1.83316 |
| Radil      | Radil-010      | 0.0292661   | 0.606493   | -1.64882 |
| Raf1       | Raf1-004       | 0.0114678   | 0.00249957 | -400.068 |
| Ralgds     | Ralgds-007     | 0.00622226  | 2.68535    | 2.68535  |
| Ralgps2    | Ralgps2-013    | 0.0446086   | 0.00737332 | -135.624 |
| Raly       | Raly-004       | 0.0201336   | 2.13379    | 2.13379  |
| Ran        | Ran-002        | 0.0456376   | 0.668556   | -1.49576 |
| Rap1a      | Rap1a-003      | 0.0453675   | 2.36165    | 2.36165  |
| Rap1gds1   | Rap1gds1-009   | 0.0487415   | 0.130667   | -7.65303 |
| Rap2b      | Rap2b-001      | 0.0031035   | 0.847729   | -1.17962 |
| Rap2c      | Rap2c-001      | 0.0225373   | 0.889008   | -1.12485 |
| Rapgef4    | Rapgef4-010    | 0.00388702  | 0.154718   | -6.46338 |
| Rapgef4os2 | Rapgef4os2-001 | 0.0120643   | 1.99627    | 1.99627  |
| Rars       | Rars-003       | 0.0118806   | 0.331561   | -3.01604 |
| Rars       | Rars-004       | 0.0258422   | 3.30948    | 3.30948  |
| Rasa1      | Rasa1-003      | 0.0331157   | 0.351592   | -2.84421 |
| Rasal3     | Rasal3-007     | 0.0269086   | 8.54836    | 8.54836  |
| Rasgef1b   | Rasgef1b-001   | 0.0401472   | 2.75519    | 2.75519  |
| Rasgef1c   | Rasgef1c-003   | 0.00149058  | 8.17889    | 8.17889  |
| Rasgrf1    | Rasgrf1-001    | 0.000115028 | 0.861581   | -1.16066 |
| Rasgrp1    | Rasgrp1-001    | 0.0367385   | 0.856768   | -1.16718 |
| Rasgrp2    | Rasgrp2-001    | 0.0421784   | 5.53752    | 5.53752  |
| Rasgrp2    | Rasgrp2-015    | 0.0408886   | 2.97529    | 2.97529  |
| Rasgrp2    | Rasgrp2-201    | 0.0432929   | 5.77707    | 5.77707  |
| Rasl10b    | Rasl10b-002    | 0.0379361   | 2.04081    | 2.04081  |
| Rassf7     | Rassf7-001     | 0.0107402   | 2.93532    | 2.93532  |
| Rassf8     | Rassf8-201     | 0.0440093   | 1.47562    | 1.47562  |
| Rassf9     | Rassf9-001     | 0.02799     | 1.861      | 1.861    |
| Rb1cc1     | Rb1cc1-014     | 0.0291785   | 10.8927    | 10.8927  |
| Rbbp6      | Rbbp6-006      | 0.0370889   | 0.00109595 | -912.447 |
| Rbm15b     | Rbm15b-001     | 0.00351154  | 1.08202    | 1.08202  |

|        |            |             |             |              |
|--------|------------|-------------|-------------|--------------|
| Rbm18  | Rbm18-003  | 0.0255238   | 4.0907      | 4.0907       |
| Rbm19  | Rbm19-003  | 0.0308986   | 3.43871     | 3.43871      |
| Rbm20  | Rbm20-003  | 0.0439659   | 6.93098e-06 | -144280      |
| Rbm3   | Rbm3-010   | 0.0470927   | 3.05957     | 3.05957      |
| Rbm39  | Rbm39-013  | 0.0471471   | 0.140113    | -7.13712     |
| Rbm39  | Rbm39-010  | 0.005367    | 3.18861     | 3.18861      |
| Rbm6   | Rbm6-018   | 0.0315597   | 0.0142138   | -70.3542     |
| Rbms1  | Rbms1-001  | 0.0279178   | 1.38944     | 1.38944      |
| Rbms3  | Rbms3-011  | 0.0378726   | 1.03863e-06 | -962802      |
| Rbp7   | Rbp7-001   | 0.0353031   | 6.90958e+08 | 6.90958e+08  |
| Rc3h2  | Rc3h2-004  | 0.0235892   | 1.41629     | 1.41629      |
| Rc3h2  | Rc3h2-008  | 0.0305706   | 2.18937     | 2.18937      |
| Rcan2  | Rcan2-203  | 0.0439826   | 3.20418     | 3.20418      |
| Rcbtb1 | Rcbtb1-008 | 0.00219248  | 0.457734    | -2.18467     |
| Rccd1  | Rccd1-009  | 0.0241691   | 2.0378      | 2.0378       |
| Rchy1  | Rchy1-002  | 0.000730824 | 0.548712    | -1.82245     |
| Rcor2  | Rcor2-003  | 0.011953    | 0.253644    | -3.94253     |
| Rd3    | Rd3-004    | 0.0329597   | 4.27287e+07 | 4.27287e+07  |
| Rdh12  | Rdh12-002  | 0.0204617   | 0.445436    | -2.24499     |
| Rdh13  | Rdh13-006  | 0.0426154   | 2.34578     | 2.34578      |
| Rdm1   | Rdm1-004   | 0.0149638   | 5.78953e-06 | -172726      |
| Recql  | Recql-003  | 0.005752    | 0.54394     | -1.83844     |
| Reep3  | Reep3-201  | 0.0100647   | 1.08458     | 1.08458      |
| Reep6  | Reep6-003  | 0.00743966  | 0.0250784   | -39.875      |
| Relb   | Relb-002   | 0.0362449   | 1.57995     | 1.57995      |
| Ren1   | Ren1-001   | 0.0331905   | 0.382268    | -2.61596     |
| Rep15  | Rep15-001  | 0.0216378   | 1.60455     | 1.60455      |
| Rev1   | Rev1-001   | 0.0134312   | 0.893346    | -1.11939     |
| Rev1   | Rev1-002   | 0.0401665   | 1.61269     | 1.61269      |
| Rexo1  | Rexo1-003  | 0.00278456  | 0.32956     | -3.03435     |
| Rexo1  | Rexo1-008  | 0.00788667  | 3.55808     | 3.55808      |
| Rexo1  | Rexo1-007  | 0.0208188   | 1.85846     | 1.85846      |
| Rfc4   | Rfc4-005   | 0.034652    | 273.51      | 273.51       |
| Rfng   | Rfng-001   | 0.0125488   | 0.843259    | -1.18588     |
| Rfwd2  | Rfwd2-002  | 0.0315493   | 2.47086     | 2.47086      |
| Rfx4   | Rfx4-001   | 0.0486189   | 5.32261e-10 | -1.87878e+09 |
| Rfx7   | Rfx7-003   | 0.00482295  | 234.434     | 234.434      |
| Rfxank | Rfxank-201 | 0.042892    | 0.827848    | -1.20795     |
| Rgmb   | Rgmb-201   | 0.00296317  | 0.888829    | -1.12508     |
| Rgs12  | Rgs12-009  | 0.0366137   | 150689      | 150689       |
| Rgs19  | Rgs19-008  | 0.0395992   | 0.139776    | -7.15429     |
| Rgs2   | Rgs2-001   | 0.0157961   | 1.23636     | 1.23636      |
| Rgs3   | Rgs3-012   | 0.0306728   | 1.57021e-10 | -6.36858e+09 |

|         |             |             |             |             |
|---------|-------------|-------------|-------------|-------------|
| Rhbdd3  | Rhbdd3-201  | 0.0324244   | 2.18136     | 2.18136     |
| Rhbdf1  | Rhbdf1-006  | 0.0128757   | 0.391532    | -2.55407    |
| Rhbdf1  | Rhbdf1-008  | 0.0206881   | 2.45013     | 2.45013     |
| Rhbdl2  | Rhbdl2-201  | 0.0446676   | 0.0315937   | -31.6519    |
| Rhbdl3  | Rhbdl3-001  | 0.0174729   | 1.20902     | 1.20902     |
| Rhno1   | Rhno1-004   | 0.0370064   | 0.00499934  | -200.026    |
| Rhoa    | Rhoa-004    | 0.0451361   | 15.827      | 15.827      |
| Rhobtb1 | Rhobtb1-007 | 0.00440258  | 0.186672    | -5.35699    |
| Rhpn1   | Rhpn1-001   | 0.0384434   | 0.745029    | -1.34223    |
| Rhpn2   | Rhpn2-002   | 0.0101942   | 2.49365e+08 | 2.49365e+08 |
| Riiad1  | Riiad1-003  | 0.0313513   | 0.00970337  | -103.057    |
| Rilp    | Rilp-002    | 0.0122619   | 6.53044     | 6.53044     |
| Rimklb  | Rimklb-007  | 0.012076    | 0.559137    | -1.78847    |
| Rimklb  | Rimklb-001  | 0.0413686   | 1.23669     | 1.23669     |
| Rims2   | Rims2-201   | 0.0305065   | 1.36416     | 1.36416     |
| Rin2    | Rin2-001    | 0.00571881  | 1.24159     | 1.24159     |
| Rin2    | Rin2-201    | 0.00571881  | 1.24159     | 1.24159     |
| Ripk1   | Ripk1-003   | 0.0180055   | 10.5134     | 10.5134     |
| Rlbp1   | Rlbp1-008   | 0.00975794  | 3.96733     | 3.96733     |
| Rlf     | Rlf-201     | 0.0150717   | 0.248929    | -4.01721    |
| Rln1    | Rln1-001    | 0.0210694   | 0.481842    | -2.07537    |
| Rmdn2   | Rmdn2-201   | 0.0429303   | 1.285       | 1.285       |
| Rnf112  | Rnf112-003  | 0.044226    | 0.817042    | -1.22393    |
| Rnf121  | Rnf121-003  | 0.0395414   | 7.13902     | 7.13902     |
| Rnf122  | Rnf122-002  | 0.0304515   | 2.04772     | 2.04772     |
| Rnf14   | Rnf14-202   | 0.0334652   | 1.43013     | 1.43013     |
| Rnf146  | Rnf146-002  | 0.00450396  | 1.42143     | 1.42143     |
| Rnf150  | Rnf150-201  | 0.0293297   | 1.10309     | 1.10309     |
| Rnf166  | Rnf166-001  | 0.0111297   | 1.21598     | 1.21598     |
| Rnf167  | Rnf167-005  | 0.0371988   | 0.58676     | -1.70427    |
| Rnf169  | Rnf169-001  | 0.0180007   | 1.12459     | 1.12459     |
| Rnf207  | Rnf207-012  | 0.00613187  | 3.09405     | 3.09405     |
| Rnf207  | Rnf207-006  | 0.0224255   | 2.84372     | 2.84372     |
| Rnf208  | Rnf208-001  | 0.049875    | 1.36547     | 1.36547     |
| Rnf24   | Rnf24-004   | 0.00194607  | 0.0664308   | -15.0532    |
| Rnf25   | Rnf25-010   | 0.0364014   | 0.206051    | -4.85317    |
| Rnf26   | Rnf26-005   | 0.0310695   | 6.00834e+10 | 6.00834e+10 |
| Rnf38   | Rnf38-017   | 0.0153659   | 1.19771     | 1.19771     |
| Rnf39   | Rnf39-002   | 0.031452    | 0.125021    | -7.99865    |
| Rnf4    | Rnf4-011    | 0.000404668 | 11.4464     | 11.4464     |
| Rnf43   | Rnf43-001   | 0.00720042  | 4.48404     | 4.48404     |
| Rnf44   | Rnf44-014   | 0.0333765   | 67.6847     | 67.6847     |
| Rnf44   | Rnf44-011   | 0.0389033   | 2.8641      | 2.8641      |

|               |                   |             |             |          |
|---------------|-------------------|-------------|-------------|----------|
| Rnf6          | Rnf6-201          | 0.0430729   | 0.691188    | -1.44678 |
| Rnf6          | Rnf6-001          | 0.0327821   | 1.22035     | 1.22035  |
| Rnft1         | Rnft1-003         | 0.00205793  | 1.73953     | 1.73953  |
| Rnmt          | Rnmt-001          | 0.0096648   | 0.861515    | -1.16075 |
| Robo2         | Robo2-002         | 0.0411277   | 1.36716     | 1.36716  |
| Robo3         | Robo3-002         | 0.034805    | 0.227095    | -4.40345 |
| Robo3         | Robo3-005         | 0.0307994   | 34.6409     | 34.6409  |
| Rock1         | Rock1-201         | 0.0310507   | 1.12551     | 1.12551  |
| Rom1          | Rom1-201          | 0.0379683   | 1.65851     | 1.65851  |
| Rorb          | Rorb-001          | 0.0415498   | 0.557659    | -1.79321 |
| Rorb          | Rorb-005          | 0.0393094   | 1.59203     | 1.59203  |
| Rp2           | Rp2-001           | 0.0136373   | 1.35897     | 1.35897  |
| RP23-142A14.9 | RP23-142A14.9-001 | 0.0298149   | 0.540861    | -1.8489  |
| RP23-144N15.8 | RP23-144N15.8-002 | 0.0426348   | 5.44772     | 5.44772  |
| RP23-179K11.4 | RP23-179K11.4-001 | 0.0260909   | 3.11196     | 3.11196  |
| RP23-26J4.3   | RP23-26J4.3-001   | 0.00281807  | 0.665756    | -1.50205 |
| RP23-312I2.6  | RP23-312I2.6-001  | 0.049387    | 0.842999    | -1.18624 |
| RP23-330J17.3 | RP23-330J17.3-001 | 0.0256443   | 5.48954     | 5.48954  |
| RP23-355N5.6  | RP23-355N5.6-001  | 0.0341341   | 5.88352     | 5.88352  |
| RP23-382G13.1 | RP23-382G13.1-003 | 0.0471214   | 580112      | 580112   |
| RP23-392K24.6 | RP23-392K24.6-001 | 0.0257806   | 1.64334     | 1.64334  |
| RP23-441J16.4 | RP23-441J16.4-002 | 0.0353929   | 4.07233     | 4.07233  |
| RP23-441J16.5 | RP23-441J16.5-001 | 0.0201258   | 4.67439     | 4.67439  |
| RP24-201D17.2 | RP24-201D17.2-001 | 0.028422    | 0.135412    | -7.38485 |
| RP24-238C11.4 | RP24-238C11.4-001 | 0.00424204  | 1.38794     | 1.38794  |
| RP24-238J9.2  | RP24-238J9.2-001  | 0.0381027   | 3.13613     | 3.13613  |
| RP24-315D19.3 | RP24-315D19.3-001 | 0.0304735   | 0.000602284 | -1660.35 |
| RP24-327I4.8  | RP24-327I4.8-001  | 0.0298213   | 0.211395    | -4.73049 |
| RP24-576D1.5  | RP24-576D1.5-001  | 0.0215611   | 0.133257    | -7.50432 |
| Rpa1          | Rpa1-001          | 0.000142247 | 0.517944    | -1.93071 |
| Rpa2          | Rpa2-002          | 0.030255    | 10.1757     | 10.1757  |
| Rpap2         | Rpap2-006         | 0.0118063   | 4.25863     | 4.25863  |
| Rph3a         | Rph3a-003         | 0.0435084   | 0.678476    | -1.47389 |
| Rpl10         | Rpl10-009         | 0.00792944  | 0.274438    | -3.64381 |
| Rpl14-ps1     | Rpl14-ps1-201     | 0.00181515  | 2.90697     | 2.90697  |
| Rpl26         | Rpl26-003         | 0.0167891   | 0.123546    | -8.09416 |
| Rpl26         | Rpl26-201         | 0.0147179   | 3.01641     | 3.01641  |
| Rpl3-ps1      | Rpl3-ps1-001      | 0.0110231   | 0.699467    | -1.42966 |
| Rpl30         | Rpl30-006         | 0.00108985  | 0.410705    | -2.43484 |
| Rpl35         | Rpl35-002         | 0.0060488   | 1.39587     | 1.39587  |
| Rpl35a        | Rpl35a-006        | 0.0243648   | 0.0272329   | -36.7204 |
| Rpl35a        | Rpl35a-004        | 0.0361211   | 1.2663      | 1.2663   |
| Rpl36a        | Rpl36a-002        | 0.0241451   | 3.53474     | 3.53474  |

|         |             |             |             |              |
|---------|-------------|-------------|-------------|--------------|
| Rpl37rt | Rpl37rt-003 | 0.0192594   | 9.0002      | 9.0002       |
| Rpl38   | Rpl38-004   | 0.0416517   | 0.28855     | -3.4656      |
| Rpl41   | Rpl41-007   | 0.0499527   | 0.485447    | -2.05996     |
| Rpl5    | Rpl5-006    | 0.0333877   | 0.67612     | -1.47903     |
| Rpl6    | Rpl6-006    | 0.0100447   | 0.396395    | -2.52274     |
| Rpl6    | Rpl6-003    | 0.0104496   | 7.53569     | 7.53569      |
| Rpl7a   | Rpl7a-006   | 0.0078856   | 1.84407e+11 | 1.84407e+11  |
| Rpl7a   | Rpl7a-004   | 0.0126615   | 1.80421     | 1.80421      |
| Rpl9    | Rpl9-009    | 0.00867256  | 5.96164     | 5.96164      |
| Rpn2    | Rpn2-002    | 0.00803156  | 0.492334    | -2.03114     |
| Rpn2    | Rpn2-001    | 0.0203391   | 1.79065     | 1.79065      |
| Rps19   | Rps19-001   | 0.0128806   | 0.406947    | -2.45732     |
| Rps19   | Rps19-006   | 0.0390657   | 1.33505     | 1.33505      |
| Rps27   | Rps27-008   | 0.0479256   | 0.436985    | -2.28841     |
| Rps3    | Rps3-002    | 0.0155625   | 2.28929     | 2.28929      |
| Rps3a3  | Rps3a3-001  | 0.0314759   | 2.75988     | 2.75988      |
| Rps5    | Rps5-006    | 0.0364579   | 0.368197    | -2.71593     |
| Rps6ka1 | Rps6ka1-004 | 0.0446608   | 0.0603897   | -16.5591     |
| Rps6ka2 | Rps6ka2-201 | 0.00506209  | 1.16586     | 1.16586      |
| Rps6ka6 | Rps6ka6-004 | 0.00257758  | 4.90338e-11 | -2.03941e+10 |
| Rps6ka6 | Rps6ka6-001 | 0.0207152   | 1.91013     | 1.91013      |
| Rps6ka6 | Rps6ka6-201 | 0.0176728   | 1.91013     | 1.91013      |
| Rps9    | Rps9-005    | 0.0306544   | 0.304752    | -3.28135     |
| Rptor   | Rptor-002   | 0.0203952   | 1.11077e-09 | -9.00275e+08 |
| Rptor   | Rptor-003   | 0.039437    | 0.833921    | -1.19915     |
| Rrh     | Rrh-004     | 0.013461    | 3.67078e+07 | 3.67078e+07  |
| Rrm2b   | Rrm2b-001   | 0.0482878   | 0.88601     | -1.12865     |
| Rrm2b   | Rrm2b-007   | 0.016448    | 1.7464      | 1.7464       |
| Rrp1b   | Rrp1b-005   | 0.0174167   | 5.21316     | 5.21316      |
| Rrp7a   | Rrp7a-001   | 0.00696839  | 1.10834     | 1.10834      |
| Rrp9    | Rrp9-005    | 0.0432301   | 0.168041    | -5.95092     |
| Rsf1    | Rsf1-003    | 0.0430647   | 1.23329     | 1.23329      |
| Rsl1d1  | Rsl1d1-002  | 0.0228245   | 2.34671     | 2.34671      |
| Rsph14  | Rsph14-004  | 0.0190124   | 3.42549     | 3.42549      |
| Rsrc2   | Rsrc2-008   | 0.0216345   | 0.138856    | -7.20173     |
| Rtn3    | Rtn3-202    | 0.0092546   | 0.864937    | -1.15615     |
| Rundc1  | Rundc1-001  | 0.000746281 | 1.20359     | 1.20359      |
| Rundc3a | Rundc3a-009 | 0.00761754  | 10.3548     | 10.3548      |
| Rwdd3   | Rwdd3-001   | 0.000611236 | 0.436724    | -2.28978     |
| Rwdd4a  | Rwdd4a-005  | 0.0389444   | 0.36943     | -2.70687     |
| Rxfp2   | Rxfp2-004   | 0.0103259   | 5.52801e-08 | -1.80897e+07 |
| Rxfp2   | Rxfp2-003   | 0.0170195   | 6.61566     | 6.61566      |
| Rxrg    | Rxrg-002    | 0.0150784   | 2.90587     | 2.90587      |

|          |              |             |             |             |
|----------|--------------|-------------|-------------|-------------|
| S100a1   | S100a1-001   | 0.0172925   | 1.16631     | 1.16631     |
| S100a16  | S100a16-007  | 0.0368387   | 2.14286     | 2.14286     |
| S100pbp  | S100pbp-002  | 0.0233886   | 1.55322     | 1.55322     |
| Sacs     | Sacs-004     | 0.0241801   | 7.52985     | 7.52985     |
| Safb     | Safb-008     | 0.0396926   | 966.076     | 966.076     |
| Sall4    | Sall4-005    | 0.000635833 | 0.137097    | -7.29412    |
| Samd15   | Samd15-201   | 0.00238561  | 0.00502827  | -198.875    |
| Sap18    | Sap18-004    | 0.0132998   | 0.137241    | -7.28647    |
| Sarm1    | Sarm1-001    | 0.00175202  | 0.656929    | -1.52224    |
| Sart3    | Sart3-003    | 0.0429126   | 5.8167      | 5.8167      |
| Sat2     | Sat2-001     | 0.00590873  | 0.579131    | -1.72672    |
| Sat2     | Sat2-003     | 0.038762    | 0.765161    | -1.30691    |
| Sat2     | Sat2-002     | 0.0480121   | 5.79157     | 5.79157     |
| Sbk1     | Sbk1-001     | 0.0130613   | 1.1703      | 1.1703      |
| Sbno1    | Sbno1-005    | 0.0489304   | 0.0193175   | -51.7666    |
| Sbno1    | Sbno1-002    | 0.036298    | 3.18161     | 3.18161     |
| Sbno1    | Sbno1-012    | 0.038284    | 2.33146     | 2.33146     |
| Sbno2    | Sbno2-201    | 0.0128703   | 1.15231     | 1.15231     |
| Sbsn     | Sbsn-003     | 0.0342765   | 6523.68     | 6523.68     |
| Sbspon   | Sbspon-001   | 0.0446996   | 2.26756     | 2.26756     |
| Scd1     | Scd1-201     | 0.02427     | 1.15693     | 1.15693     |
| Scg5     | Scg5-002     | 0.0339439   | 0.726126    | -1.37717    |
| Schip1   | Schip1-009   | 0.0209179   | 1.40132     | 1.40132     |
| Sclt1    | Sclt1-001    | 0.0308063   | 1.8322      | 1.8322      |
| Scmh1    | Scmh1-202    | 0.0118428   | 1.84971     | 1.84971     |
| Scmh1    | Scmh1-003    | 0.0224149   | 1.57392     | 1.57392     |
| Scmh1    | Scmh1-006    | 0.0469817   | 7.04362e+06 | 7.04362e+06 |
| Scn8a    | Scn8a-201    | 0.0128738   | 0.847858    | -1.17944    |
| Scnm1    | Scnm1-007    | 0.0375196   | 0.452326    | -2.21079    |
| Scnm1    | Scnm1-008    | 0.0404828   | 0.583315    | -1.71434    |
| Scnn1a   | Scnn1a-004   | 0.0322496   | 0.384266    | -2.60236    |
| Sco2     | Sco2-201     | 0.00574994  | 0.744864    | -1.34253    |
| Scp2     | Scp2-003     | 0.0398992   | 0.20472     | -4.88472    |
| Scpep1   | Scpep1-001   | 0.024679    | 1.22233     | 1.22233     |
| Scrn3    | Scrn3-001    | 0.0147969   | 0.790068    | -1.26571    |
| Sdcbp    | Sdcbp-001    | 0.0444334   | 0.827987    | -1.20775    |
| Sdccag3  | Sdccag3-011  | 0.0428976   | 0.239282    | -4.17917    |
| Sec11a   | Sec11a-006   | 0.0419476   | 0.0253612   | -39.4303    |
| Sec11a   | Sec11a-001   | 0.00363078  | 1.66535     | 1.66535     |
| Sec14l2  | Sec14l2-001  | 0.0280171   | 0.406137    | -2.46222    |
| Sec31a   | Sec31a-001   | 0.0301697   | 0.894825    | -1.11754    |
| Sec61a1  | Sec61a1-010  | 0.0124414   | 0.164867    | -6.0655     |
| Secisbp2 | Secisbp2-001 | 0.0361315   | 1.10944     | 1.10944     |

|           |               |             |             |          |
|-----------|---------------|-------------|-------------|----------|
| Selenbp1  | Selenbp1-007  | 0.0388947   | 127.884     | 127.884  |
| Sema3a    | Sema3a-001    | 0.0235486   | 1.9836      | 1.9836   |
| Sema3b    | Sema3b-007    | 0.0347604   | 0.000699277 | -1430.05 |
| Sema3b    | Sema3b-003    | 0.0155532   | 1788.68     | 1788.68  |
| Sema3f    | Sema3f-001    | 0.0207795   | 2.5286      | 2.5286   |
| Sema4a    | Sema4a-202    | 0.0278991   | 0.528573    | -1.89189 |
| Sema4d    | Sema4d-001    | 0.026031    | 0.722181    | -1.38469 |
| Sema6d    | Sema6d-008    | 0.0398198   | 0.804872    | -1.24243 |
| Senp1     | Senp1-005     | 0.0283459   | 2.53489     | 2.53489  |
| Senp5     | Senp5-003     | 0.0304907   | 0.259725    | -3.85023 |
| Senp6     | Senp6-004     | 0.00799031  | 2.85455     | 2.85455  |
| Senp7     | Senp7-001     | 0.00281685  | 0.666401    | -1.5006  |
| Senp7     | Senp7-011     | 0.020587    | 13.6761     | 13.6761  |
| Senp7     | Senp7-202     | 0.0197214   | 1.49036     | 1.49036  |
| Sephs1    | Sephs1-003    | 0.0257453   | 2.74997     | 2.74997  |
| Sephs1    | Sephs1-004    | 0.0212261   | 5.49992     | 5.49992  |
| 02-Sep    | Sept2-203     | 0.0117131   | 1.26899     | 1.26899  |
| 06-Sep    | Sept6-002     | 0.0102721   | 0.817452    | -1.22331 |
| 08-Sep    | Sept8-002     | 0.0484632   | 1.29367     | 1.29367  |
| Serac1    | Serac1-006    | 0.00371623  | 8.78096     | 8.78096  |
| Serac1    | Serac1-004    | 0.0394885   | 16784.2     | 16784.2  |
| Serhl     | Serhl-011     | 0.0351701   | 0.275199    | -3.63374 |
| Serhl     | Serhl-015     | 0.0328682   | 7167.47     | 7167.47  |
| Serpinb6a | Serpinb6a-010 | 0.000764751 | 192.537     | 192.537  |
| Sertad2   | Sertad2-001   | 0.0305244   | 0.527849    | -1.89448 |
| Sertm1    | Sertm1-001    | 0.0345367   | 0.814523    | -1.22771 |
| Sesn3     | Sesn3-001     | 0.0253987   | 1.27022     | 1.27022  |
| Setd5     | Setd5-004     | 0.0477329   | 2.24235     | 2.24235  |
| Setd8     | Setd8-004     | 0.0357553   | 11.5059     | 11.5059  |
| Setmar    | Setmar-002    | 0.0341257   | 0.0589134   | -16.9741 |
| Sez6      | Sez6-007      | 0.0484495   | 1.27872     | 1.27872  |
| Sez6l2    | Sez6l2-007    | 0.0449368   | 1.51719     | 1.51719  |
| Sf1       | Sf1-003       | 0.0165309   | 2.26401     | 2.26401  |
| Sf3a1     | Sf3a1-001     | 0.0306033   | 1.84614     | 1.84614  |
| Sfrp1     | Sfrp1-001     | 0.000898562 | 2.61455     | 2.61455  |
| Sft2d2    | Sft2d2-001    | 0.00565667  | 1.24352     | 1.24352  |
| Sfxn5     | Sfxn5-009     | 0.0343711   | 0.65249     | -1.53259 |
| Sgca      | Sgca-202      | 0.0102542   | 0.00136461  | -732.812 |
| Sgce      | Sgce-010      | 0.0264342   | 2.13399     | 2.13399  |
| Sgcg      | Sgcg-001      | 0.023454    | 4.86356     | 4.86356  |
| Sgk3      | Sgk3-010      | 0.000730703 | 2.53888     | 2.53888  |
| Sgpl1     | Sgpl1-003     | 0.0369404   | 4.54626e-06 | -219961  |
| Sgsm2     | Sgsm2-002     | 0.0195373   | 0.839256    | -1.19153 |



|          |              |             |           |          |
|----------|--------------|-------------|-----------|----------|
| Sh2b1    | Sh2b1-010    | 0.027838    | 3571.46   | 3571.46  |
| Sh2b1    | Sh2b1-002    | 0.0485485   | 1.72312   | 1.72312  |
| Sh2d4b   | Sh2d4b-002   | 0.0379216   | 2.48576   | 2.48576  |
| Sh3bgr   | Sh3bgr-004   | 0.0452219   | 0.0041943 | -238.419 |
| Sh3bgr   | Sh3bgr-005   | 0.0111215   | 6.67223   | 6.67223  |
| Sh3bp1   | Sh3bp1-002   | 0.0114715   | 9.32405   | 9.32405  |
| Sh3bp5l  | Sh3bp5l-001  | 0.0432541   | 1.25826   | 1.25826  |
| Sh3d19   | Sh3d19-001   | 0.0128332   | 1.44063   | 1.44063  |
| Sh3gl1   | Sh3gl1-201   | 0.0218665   | 1.08496   | 1.08496  |
| Sh3glb1  | Sh3glb1-003  | 0.0184112   | 1.10942   | 1.10942  |
| Sh3pxd2b | Sh3pxd2b-001 | 0.0149051   | 1.19277   | 1.19277  |
| Sh3rf2   | Sh3rf2-002   | 0.045372    | 8.33863   | 8.33863  |
| Shb      | Shb-001      | 0.0365522   | 1.37407   | 1.37407  |
| Shisa6   | Shisa6-002   | 0.0317294   | 0.794255  | -1.25904 |
| Shisa7   | Shisa7-003   | 0.00237757  | 1.45433   | 1.45433  |
| Shkbp1   | Shkbp1-004   | 0.00119535  | 0.0953921 | -10.483  |
| Shkbp1   | Shkbp1-011   | 0.00916423  | 2.10689   | 2.10689  |
| Shpk     | Shpk-002     | 5.27982e-05 | 0.617403  | -1.61969 |
| Shtn1    | Shtn1-201    | 0.00010121  | 1.7391    | 1.7391   |
| Sik1     | Sik1-201     | 0.0400648   | 1.33688   | 1.33688  |
| Sipa1l1  | Sipa1l1-202  | 0.0258559   | 0.863031  | -1.15871 |
| Sipa1l3  | Sipa1l3-013  | 0.024316    | 3.47269   | 3.47269  |
| Sirpa    | Sirpa-001    | 0.0102      | 0.897299  | -1.11446 |
| Sirpa    | Sirpa-201    | 0.0198956   | 2.07666   | 2.07666  |
| Sirt1    | Sirt1-004    | 0.00723894  | 3.22747   | 3.22747  |
| Sirt7    | Sirt7-006    | 0.0150676   | 1.55089   | 1.55089  |
| Sirt7    | Sirt7-009    | 0.0406446   | 2.01789   | 2.01789  |
| Six3os1  | Six3os1-013  | 0.0148559   | 35038.3   | 35038.3  |
| Six3os1  | Six3os1-002  | 0.0234724   | 6.25249   | 6.25249  |
| Six3os1  | Six3os1-001  | 0.0358688   | 20.416    | 20.416   |
| Skida1   | Skida1-001   | 0.0199467   | 0.754322  | -1.32569 |
| Skida1   | Skida1-201   | 0.0165849   | 2.21646   | 2.21646  |
| Skil     | Skil-003     | 0.0141817   | 0.316586  | -3.1587  |
| Skp2     | Skp2-001     | 0.0248415   | 1.75735   | 1.75735  |
| Slamf6   | Slamf6-003   | 0.0345386   | 5.14304   | 5.14304  |
| Slbp     | Slbp-007     | 0.0360405   | 0.0890201 | -11.2334 |
| Slc12a3  | Slc12a3-201  | 0.0305343   | 6.88085   | 6.88085  |
| Slc12a4  | Slc12a4-003  | 0.0215826   | 13.3038   | 13.3038  |
| Slc16a8  | Slc16a8-001  | 0.020406    | 10.6796   | 10.6796  |
| Slc17a7  | Slc17a7-201  | 0.0445068   | 0.907829  | -1.10153 |
| Slc1a1   | Slc1a1-001   | 0.0190925   | 0.909019  | -1.10009 |
| Slc1a4   | Slc1a4-201   | 0.0200821   | 0.815563  | -1.22615 |
| Slc22a3  | Slc22a3-201  | 0.0134621   | 2.44568   | 2.44568  |

|          |              |             |             |              |
|----------|--------------|-------------|-------------|--------------|
| Slc24a2  | Slc24a2-201  | 0.0101614   | 0.81879     | -1.22131     |
| Slc25a19 | Slc25a19-001 | 0.0071246   | 1.34322     | 1.34322      |
| Slc25a22 | Slc25a22-002 | 0.0417915   | 0.87109     | -1.14799     |
| Slc25a25 | Slc25a25-001 | 0.0205397   | 1.47223     | 1.47223      |
| Slc25a33 | Slc25a33-001 | 0.000417148 | 1.18418     | 1.18418      |
| Slc25a38 | Slc25a38-001 | 0.0141179   | 1.20411     | 1.20411      |
| Slc25a42 | Slc25a42-004 | 0.00334257  | 1.51078     | 1.51078      |
| Slc25a48 | Slc25a48-001 | 0.0166406   | 0.392592    | -2.54718     |
| Slc26a2  | Slc26a2-002  | 0.0395552   | 1.22671e-05 | -81519       |
| Slc27a3  | Slc27a3-001  | 0.0201463   | 2.29097     | 2.29097      |
| Slc27a4  | Slc27a4-002  | 0.0231177   | 2.75788     | 2.75788      |
| Slc28a3  | Slc28a3-001  | 0.0449579   | 1.52297     | 1.52297      |
| Slc29a1  | Slc29a1-005  | 0.0488664   | 0.175208    | -5.7075      |
| Slc2a1   | Slc2a1-001   | 0.0405955   | 1.21587     | 1.21587      |
| Slc2a6   | Slc2a6-003   | 0.0141016   | 0.690989    | -1.4472      |
| Slc30a9  | Slc30a9-004  | 0.00332634  | 0.0475535   | -21.029      |
| Slc35a1  | Slc35a1-005  | 0.0243449   | 0.246589    | -4.05533     |
| Slc35a1  | Slc35a1-001  | 0.0476048   | 1.17233     | 1.17233      |
| Slc35b1  | Slc35b1-002  | 0.0296468   | 0.850004    | -1.17646     |
| Slc35b1  | Slc35b1-005  | 0.0198345   | 0.493276    | -2.02726     |
| Slc35b1  | Slc35b1-001  | 0.0280968   | 1.34269     | 1.34269      |
| Slc35b2  | Slc35b2-201  | 0.0482939   | 1.1313      | 1.1313       |
| Slc35c1  | Slc35c1-001  | 0.0244334   | 0.801523    | -1.24763     |
| Slc35c2  | Slc35c2-002  | 0.0384844   | 2.78375     | 2.78375      |
| Slc37a3  | Slc37a3-010  | 0.0414383   | 0.00878188  | -113.871     |
| Slc37a3  | Slc37a3-013  | 6.9588e-05  | 15.3379     | 15.3379      |
| Slc37a3  | Slc37a3-004  | 0.0039323   | 3.09295     | 3.09295      |
| Slc37a4  | Slc37a4-201  | 0.0270179   | 0.904528    | -1.10555     |
| Slc38a10 | Slc38a10-007 | 0.0266198   | 4.24036e-07 | -2.35829e+06 |
| Slc38a3  | Slc38a3-005  | 0.0222475   | 1.59307     | 1.59307      |
| Slc38a3  | Slc38a3-003  | 0.0221294   | 1.72549     | 1.72549      |
| Slc38a3  | Slc38a3-002  | 0.0367558   | 1.34507     | 1.34507      |
| Slc38a4  | Slc38a4-202  | 0.00775274  | 1074.94     | 1074.94      |
| Slc39a13 | Slc39a13-008 | 0.0445161   | 0.58087     | -1.72155     |
| Slc39a3  | Slc39a3-003  | 0.0148587   | 0.117231    | -8.53019     |
| Slc39a3  | Slc39a3-004  | 0.00299424  | 3.29589     | 3.29589      |
| Slc39a7  | Slc39a7-007  | 0.0253877   | 0.0984384   | -10.1586     |
| Slc39a7  | Slc39a7-005  | 0.00410476  | 2.64261     | 2.64261      |
| Slc39a8  | Slc39a8-003  | 0.0177956   | 0.234314    | -4.26779     |
| Slc44a5  | Slc44a5-002  | 0.0326031   | 0.881265    | -1.13473     |
| Slc44a5  | Slc44a5-001  | 0.0474111   | 0.757443    | -1.32023     |
| Slc45a3  | Slc45a3-002  | 0.0362139   | 3.61471     | 3.61471      |
| Slc4a10  | Slc4a10-003  | 0.0127668   | 1.3819      | 1.3819       |

|          |              |            |             |              |
|----------|--------------|------------|-------------|--------------|
| Slc4a1ap | Slc4a1ap-005 | 0.0296423  | 6.17525     | 6.17525      |
| Slc4a1ap | Slc4a1ap-006 | 0.0228153  | 5.87042     | 5.87042      |
| Slc4a1ap | Slc4a1ap-013 | 0.0373617  | 64305.8     | 64305.8      |
| Slc4a1ap | Slc4a1ap-012 | 0.0463153  | 25607.2     | 25607.2      |
| Slc4a2   | Slc4a2-001   | 0.0300507  | 3.88149     | 3.88149      |
| Slc4a7   | Slc4a7-201   | 0.00865003 | 0.830959    | -1.20343     |
| Slc50a1  | Slc50a1-008  | 0.0462971  | 0.00965598  | -103.563     |
| Slc5a11  | Slc5a11-201  | 0.0229081  | 0.221461    | -4.51547     |
| Slc6a1   | Slc6a1-005   | 0.0240678  | 4.88168     | 4.88168      |
| Slc6a15  | Slc6a15-202  | 0.0324301  | 0.884363    | -1.13076     |
| Slc6a20a | Slc6a20a-003 | 0.0360231  | 207.022     | 207.022      |
| Slc6a9   | Slc6a9-012   | 0.0396137  | 0.687753    | -1.45401     |
| Slc7a14  | Slc7a14-002  | 0.0352428  | 2.76517     | 2.76517      |
| Slc7a15  | Slc7a15-001  | 0.0365965  | 2.85245e-06 | -350575      |
| Slc7a7   | Slc7a7-003   | 0.0431791  | 2.54344e-07 | -3.93169e+06 |
| Slc9b2   | Slc9b2-003   | 0.0291363  | 0.278609    | -3.58926     |
| Slco1c1  | Slco1c1-002  | 0.00150722 | 1.67323     | 1.67323      |
| Slco2a1  | Slco2a1-002  | 0.0263241  | 0.334225    | -2.99199     |
| Slf1     | Slf1-002     | 0.0293535  | 1.37498     | 1.37498      |
| Slitrk1  | Slitrk1-201  | 0.00582221 | 0.848929    | -1.17795     |
| Slitrk2  | Slitrk2-001  | 0.0470245  | 0.822371    | -1.216       |
| Slitrk3  | Slitrk3-001  | 0.00747286 | 0.843191    | -1.18597     |
| Slitrk4  | Slitrk4-002  | 0.0298529  | 0.636922    | -1.57005     |
| Slitrk5  | Slitrk5-201  | 0.0115543  | 0.836453    | -1.19552     |
| SImap    | SImap-009    | 0.0138953  | 0.000124076 | -8059.57     |
| SImap    | SImap-001    | 0.0453142  | 0.874281    | -1.1438      |
| SImo2    | SImo2-002    | 0.00289472 | 0.131035    | -7.63156     |
| Slpi     | Slpi-001     | 0.0331617  | 3.5334e-06  | -283014      |
| Slx1b    | Slx1b-004    | 0.0440074  | 0.500632    | -1.99747     |
| Slx4     | Slx4-008     | 0.0453652  | 2.79229     | 2.79229      |
| Smad4    | Smad4-001    | 0.0445379  | 1.11512     | 1.11512      |
| Smad5    | Smad5-001    | 0.00127087 | 1.14445     | 1.14445      |
| Smarca5  | Smarca5-005  | 0.0242129  | 0.239494    | -4.17548     |
| Smarcad1 | Smarcad1-012 | 0.00149186 | 1.44843e-10 | -6.90403e+09 |
| Smarcd2  | Smarcd2-003  | 0.0308515  | 0.0698175   | -14.3231     |
| Smc2     | Smc2-002     | 0.0388067  | 0.605957    | -1.65028     |
| Smc2os   | Smc2os-001   | 0.00821473 | 0.302248    | -3.30854     |
| Smc3     | Smc3-001     | 0.0158479  | 1.08704     | 1.08704      |
| Smg7     | Smg7-004     | 0.0260868  | 0.0283711   | -35.2472     |
| Smim5    | Smim5-001    | 0.0177199  | 3.3174      | 3.3174       |
| Smn1     | Smn1-008     | 0.0440115  | 44.2859     | 44.2859      |
| Smox     | Smox-009     | 0.00875165 | 2.45023     | 2.45023      |
| Smpd4    | Smpd4-012    | 0.0393737  | 0.533728    | -1.87362     |

|          |              |             |             |             |
|----------|--------------|-------------|-------------|-------------|
| Smpd4    | Smpd4-007    | 0.0246638   | 7.34111     | 7.34111     |
| Smug1    | Smug1-201    | 0.0448207   | 1.16161     | 1.16161     |
| Smurf2   | Smurf2-001   | 0.0212928   | 1.12029     | 1.12029     |
| Smyd4    | Smyd4-002    | 0.0467806   | 0.419403    | -2.38434    |
| Snapc4   | Snapc4-201   | 0.0334586   | 1.41106     | 1.41106     |
| Snapin   | Snapin-003   | 0.00311592  | 1.88102     | 1.88102     |
| Snaip    | Snaip-003    | 0.0433671   | 0.348262    | -2.8714     |
| Snaip    | Snaip-005    | 0.00660771  | 12.1548     | 12.1548     |
| Snd1     | Snd1-002     | 0.034024    | 0.589801    | -1.69549    |
| Sned1    | Sned1-006    | 0.0172658   | 9.16938     | 9.16938     |
| Sned1    | Sned1-005    | 0.0449925   | 8.33794     | 8.33794     |
| Snhg17   | Snhg17-004   | 0.0336124   | 0.321257    | -3.11278    |
| Snhg17   | Snhg17-001   | 0.0147875   | 11.7457     | 11.7457     |
| Snhg5    | Snhg5-008    | 0.042867    | 1.49035     | 1.49035     |
| Snhg6    | Snhg6-005    | 0.0478299   | 0.302342    | -3.30752    |
| Snord104 | Snord104-201 | 0.0174453   | 0.338213    | -2.95672    |
| Snord14e | Snord14e-201 | 0.0452348   | 1.46691e+06 | 1.46691e+06 |
| Snord7   | Snord7-201   | 0.019853    | 0.262463    | -3.81006    |
| Snrnp27  | Snrnp27-001  | 0.0295561   | 0.920431    | -1.08645    |
| Snrpg    | Snrpg-001    | 0.0191189   | 0.640283    | -1.56181    |
| Sntg1    | Sntg1-005    | 0.0236565   | 0.716242    | -1.39618    |
| Sntg1    | Sntg1-004    | 0.0194384   | 0.310657    | -3.21898    |
| Snurf    | Snurf-001    | 0.0140819   | 0.820065    | -1.21942    |
| Snx13    | Snx13-201    | 0.0399078   | 0.916419    | -1.0912     |
| Snx15    | Snx15-002    | 0.00599619  | 0.124257    | -8.04787    |
| Snx27    | Snx27-009    | 0.0434692   | 0.00339764  | -294.322    |
| Snx33    | Snx33-201    | 0.0183256   | 1.25804     | 1.25804     |
| Snx5     | Snx5-003     | 0.0156225   | 0.902237    | -1.10836    |
| Snx7     | Snx7-004     | 0.0125631   | 0.357726    | -2.79544    |
| Snx8     | Snx8-005     | 0.0314605   | 4.3034      | 4.3034      |
| Soat1    | Soat1-007    | 0.0267168   | 3.73148     | 3.73148     |
| Sorbs2   | Sorbs2-024   | 0.0113564   | 5.03129     | 5.03129     |
| Sorbs2   | Sorbs2-021   | 0.0189102   | 51561.3     | 51561.3     |
| Sorbs3   | Sorbs3-201   | 0.0277617   | 1.22191     | 1.22191     |
| Sort1    | Sort1-001    | 0.0244107   | 0.89746     | -1.11426    |
| Sox11    | Sox11-001    | 9.04049e-05 | 1.34153     | 1.34153     |
| Sox2ot   | Sox2ot-014   | 0.00390617  | 0.291394    | -3.43179    |
| Sox8     | Sox8-002     | 0.0154802   | 5.75416     | 5.75416     |
| Sp1      | Sp1-005      | 0.00966952  | 34.2984     | 34.2984     |
| Sp100    | Sp100-012    | 0.0303374   | 0.217391    | -4.6        |
| Sp3      | Sp3-001      | 0.0362054   | 1.32839     | 1.32839     |
| Spag6    | Spag6-001    | 0.0368709   | 1.34778     | 1.34778     |
| Sparc    | Sparc-005    | 0.0351404   | 0.00346521  | -288.583    |

|            |                |             |             |             |
|------------|----------------|-------------|-------------|-------------|
| Sparc      | Sparc-006      | 0.0194444   | 2.29626e+07 | 2.29626e+07 |
| Spata1     | Spata1-004     | 0.0177573   | 2.45294     | 2.45294     |
| Spata18    | Spata18-003    | 0.0348299   | 0.0119745   | -83.5106    |
| Spata2l    | Spata2l-202    | 0.0228906   | 1.25475     | 1.25475     |
| Spata31d1d | Spata31d1d-001 | 0.0466811   | 0.189678    | -5.27209    |
| Spata32    | Spata32-001    | 0.0399474   | 0.525524    | -1.90286    |
| Spdya      | Spdya-003      | 0.0417179   | 3.6738e+06  | 3.6738e+06  |
| Specc1     | Specc1-013     | 0.0299806   | 0.873847    | -1.14437    |
| Specc1l    | Specc1l-201    | 0.0298027   | 1.31267     | 1.31267     |
| Speer5-ps1 | Speer5-ps1-001 | 0.0168954   | 6.58725     | 6.58725     |
| Speg       | Speg-011       | 0.0417988   | 2.4112      | 2.4112      |
| Spink10    | Spink10-006    | 0.0311913   | 3.7167e+06  | 3.7167e+06  |
| Spink8     | Spink8-001     | 0.0219414   | 0.763383    | -1.30996    |
| Spint2     | Spint2-201     | 0.0152526   | 4.21323     | 4.21323     |
| Spock3     | Spock3-003     | 0.0484426   | 1.35075     | 1.35075     |
| Spopl      | Spopl-002      | 0.0223273   | 3.55292     | 3.55292     |
| Spp1       | Spp1-003       | 0.0261254   | 23.4985     | 23.4985     |
| Spred1     | Spred1-001     | 0.0158028   | 1.13326     | 1.13326     |
| Sprn       | Sprn-001       | 0.00554654  | 0.851986    | -1.17373    |
| Spsb1      | Spsb1-009      | 0.0489926   | 19.6058     | 19.6058     |
| Sptan1     | Sptan1-004     | 0.00121129  | 0.907147    | -1.10236    |
| Sptan1     | Sptan1-008     | 0.00631298  | 0.654582    | -1.52769    |
| Sptb       | Sptb-001       | 0.0331714   | 0.92719     | -1.07853    |
| Sptb       | Sptb-002       | 0.000325026 | 2.47037     | 2.47037     |
| Src        | Src-001        | 0.03087     | 0.831485    | -1.20267    |
| Srfbp1     | Srfbp1-201     | 0.019563    | 0.913819    | -1.09431    |
| Srgap2     | Srgap2-005     | 0.0113431   | 1.42339     | 1.42339     |
| Srgap3     | Srgap3-006     | 0.0491571   | 0.613778    | -1.62925    |
| Sri        | Sri-001        | 0.0330318   | 0.612016    | -1.63394    |
| Srl        | Srl-003        | 0.033915    | 4.71758     | 4.71758     |
| Srm        | Srm-001        | 0.0338187   | 1.12339     | 1.12339     |
| Srms       | Srms-001       | 0.0205122   | 0.517787    | -1.93129    |
| Srpkl      | Srpkl-003      | 0.00971144  | 0.21846     | -4.5775     |
| Srrt       | Srrt-009       | 0.041518    | 1.34462     | 1.34462     |
| Srsf1      | Srsf1-001      | 0.00556959  | 1.17251     | 1.17251     |
| Srsf10     | Srsf10-006     | 0.0099341   | 2.80052     | 2.80052     |
| Srsf11     | Srsf11-016     | 0.0475173   | 0.604029    | -1.65555    |
| Srsf6      | Srsf6-004      | 0.0475437   | 1.24518     | 1.24518     |
| Ssbp2      | Ssbp2-009      | 0.00997382  | 0.180133    | -5.55146    |
| Ssbp3      | Ssbp3-014      | 0.0335101   | 0.585637    | -1.70754    |
| Ssfa2      | Ssfa2-005      | 0.00585957  | 2.53082     | 2.53082     |
| Ssr2       | Ssr2-003       | 0.0478541   | 4.06311     | 4.06311     |
| Sssca1     | Sssca1-004     | 0.0187868   | 0.350351    | -2.85428    |

|            |                |             |            |          |
|------------|----------------|-------------|------------|----------|
| St14       | St14-004       | 0.0437579   | 3.95504    | 3.95504  |
| St5        | St5-203        | 0.016937    | 0.24186    | -4.13463 |
| St6gal1    | St6gal1-002    | 0.0186063   | 137.556    | 137.556  |
| St6galnac2 | St6galnac2-002 | 0.0334575   | 2.07444    | 2.07444  |
| St6galnac2 | St6galnac2-001 | 0.0205824   | 2.61089    | 2.61089  |
| St6galnac5 | St6galnac5-001 | 0.0076705   | 0.837475   | -1.19407 |
| St7        | St7-007        | 0.0318691   | 3.58484    | 3.58484  |
| St7l       | St7l-002       | 0.00588245  | 0.662624   | -1.50915 |
| St7l       | St7l-010       | 0.000605665 | 2.3269     | 2.3269   |
| Stab1      | Stab1-006      | 0.0376743   | 0.0233228  | -42.8766 |
| Stam       | Stam-009       | 0.0252933   | 0.91681    | -1.09074 |
| Stampb     | Stampb-001     | 0.00130226  | 1.5942     | 1.5942   |
| Stard10    | Stard10-006    | 0.00180153  | 6.87536    | 6.87536  |
| Stard3     | Stard3-001     | 0.029543    | 1.15139    | 1.15139  |
| Stat5b     | Stat5b-002     | 0.0488311   | 2.48244    | 2.48244  |
| Steap2     | Steap2-004     | 0.039494    | 3.40071    | 3.40071  |
| Steap2     | Steap2-002     | 0.00457019  | 8.8076     | 8.8076   |
| Steap3     | Steap3-005     | 0.0013813   | 14.9308    | 14.9308  |
| Steap3     | Steap3-002     | 0.00331778  | 6.96077    | 6.96077  |
| Stk17b     | Stk17b-001     | 0.00710795  | 1.28985    | 1.28985  |
| Stk25      | Stk25-003      | 0.00713628  | 0.815354   | -1.22646 |
| Stk32c     | Stk32c-002     | 0.0426357   | 1.39754    | 1.39754  |
| Stk35      | Stk35-002      | 0.0161067   | 1.1311     | 1.1311   |
| Stk38      | Stk38-015      | 0.00338102  | 0.417482   | -2.39531 |
| Stpg1      | Stpg1-002      | 0.0148396   | 7.56512    | 7.56512  |
| Stra6      | Stra6-012      | 0.0169558   | 0.00339333 | -294.696 |
| Stra6      | Stra6-002      | 0.0259194   | 4.8294     | 4.8294   |
| Strap      | Strap-002      | 0.0374645   | 4.91632    | 4.91632  |
| Strip2     | Strip2-002     | 0.0391137   | 2.73946    | 2.73946  |
| Strn       | Strn-003       | 0.00143991  | 5018.26    | 5018.26  |
| Stx18      | Stx18-009      | 0.0301007   | 3.31768    | 3.31768  |
| Stx1a      | Stx1a-003      | 0.0186456   | 1.79027    | 1.79027  |
| Stx8       | Stx8-004       | 0.00114329  | 0.00654886 | -152.698 |
| Stxbp2     | Stxbp2-010     | 0.0451739   | 0.14101    | -7.09169 |
| Styk1      | Styk1-003      | 0.0062802   | 3.3398     | 3.3398   |
| Sucla2     | Sucla2-002     | 0.0431017   | 0.181248   | -5.51731 |
| Suco       | Suco-001       | 0.0298845   | 1.07987    | 1.07987  |
| Sulf1      | Sulf1-002      | 0.0225224   | 9.77199    | 9.77199  |
| Sumf1      | Sumf1-006      | 0.0079671   | 0.244841   | -4.08428 |
| Sumf1      | Sumf1-001      | 0.018394    | 1.16942    | 1.16942  |
| Sumo1      | Sumo1-004      | 0.0211995   | 0.019904   | -50.2411 |
| Sun1       | Sun1-005       | 0.0233208   | 17.1437    | 17.1437  |
| Sun2       | Sun2-002       | 0.0287362   | 1.54282    | 1.54282  |

|          |              |             |           |          |
|----------|--------------|-------------|-----------|----------|
| Supt20   | Supt20-001   | 0.0134426   | 0.382235  | -2.61619 |
| Supt20   | Supt20-201   | 0.0365709   | 0.367682  | -2.71974 |
| Supt20   | Supt20-009   | 0.00713357  | 4.33474   | 4.33474  |
| Supt3    | Supt3-001    | 0.0234776   | 0.449714  | -2.22363 |
| Supt7l   | Supt7l-003   | 0.0227669   | 1.50867   | 1.50867  |
| Supv3l1  | Supv3l1-002  | 0.026777    | 1.97332   | 1.97332  |
| Surf2    | Surf2-001    | 0.0169771   | 0.772803  | -1.29399 |
| Surf6    | Surf6-005    | 0.02915     | 118.002   | 118.002  |
| Surf6    | Surf6-001    | 0.0278479   | 1.15096   | 1.15096  |
| Suv420h1 | Suv420h1-001 | 0.00534423  | 0.766697  | -1.3043  |
| Svil     | Svil-008     | 0.041617    | 32.3837   | 32.3837  |
| Swi5     | Swi5-003     | 0.00383659  | 0.285315  | -3.5049  |
| Swt1     | Swt1-009     | 0.0419748   | 0.234675  | -4.26121 |
| Swt1     | Swt1-003     | 0.0343171   | 17.4418   | 17.4418  |
| Syap1    | Syap1-002    | 0.0285839   | 0.501216  | -1.99515 |
| Sybu     | Sybu-201     | 0.0305308   | 0.671169  | -1.48994 |
| Sycp1    | Sycp1-003    | 9.74892e-05 | 0.282182  | -3.54381 |
| Sycp1    | Sycp1-001    | 0.0266672   | 1.63793   | 1.63793  |
| Syn2     | Syn2-001     | 0.00703738  | 0.879496  | -1.13701 |
| Syn2     | Syn2-003     | 0.00460154  | 0.849474  | -1.1772  |
| Syn2     | Syn2-005     | 0.0213399   | 0.682878  | -1.46439 |
| Syncrip  | Syncrip-007  | 0.0199091   | 3.714     | 3.714    |
| Syncrip  | Syncrip-006  | 0.00839625  | 2.62509   | 2.62509  |
| Syne1    | Syne1-201    | 0.0265898   | 0.867357  | -1.15293 |
| Syne2    | Syne2-001    | 0.0499261   | 1.77306   | 1.77306  |
| Syne2    | Syne2-201    | 0.0490965   | 1.8577    | 1.8577   |
| Syngr2   | Syngr2-007   | 0.0267339   | 0.111571  | -8.96287 |
| Synj1    | Synj1-002    | 0.00426762  | 0.822557  | -1.21572 |
| Synj2    | Synj2-011    | 0.0159129   | 5.09799   | 5.09799  |
| Sypl     | Sypl-006     | 0.00308091  | 14.3568   | 14.3568  |
| Syt14    | Syt14-004    | 0.0477377   | 0.0600199 | -16.6611 |
| Syt2     | Syt2-003     | 0.00113966  | 0.14289   | -6.9984  |
| Sytl2    | Sytl2-001    | 0.0271942   | 0.446871  | -2.23778 |
| Sytl2    | Sytl2-005    | 0.00714696  | 4.06069   | 4.06069  |
| Szt2     | Szt2-003     | 0.0232287   | 5.02296   | 5.02296  |
| Tab2     | Tab2-004     | 0.0413037   | 2.02434   | 2.02434  |
| Tacc2    | Tacc2-201    | 0.0026591   | 0.840924  | -1.18917 |
| Tacc2    | Tacc2-202    | 0.0016057   | 2.09571   | 2.09571  |
| Tada1    | Tada1-002    | 0.0179736   | 1.29527   | 1.29527  |
| Tada3    | Tada3-004    | 0.0402065   | 0.35724   | -2.79924 |
| Taf1     | Taf1-201     | 0.0260762   | 1.99772   | 1.99772  |
| Taf10    | Taf10-001    | 0.0494596   | 1.16221   | 1.16221  |
| Taf13    | Taf13-003    | 0.0473561   | 1.25588   | 1.25588  |

|         |             |             |             |          |
|---------|-------------|-------------|-------------|----------|
| Taf15   | Taf15-004   | 0.0325348   | 3.05613e-05 | -32721.1 |
| Taf1b   | Taf1b-201   | 0.038226    | 0.926618    | -1.07919 |
| Taf1c   | Taf1c-005   | 0.0199882   | 152.927     | 152.927  |
| Taf4a   | Taf4a-001   | 0.024288    | 1.13595     | 1.13595  |
| Taf6    | Taf6-001    | 0.00220319  | 1.56755     | 1.56755  |
| Taf6l   | Taf6l-001   | 0.0203883   | 0.484281    | -2.06492 |
| Taf6l   | Taf6l-203   | 0.0221488   | 4.94292     | 4.94292  |
| Tagap   | Tagap-001   | 0.0303116   | 0.705171    | -1.4181  |
| Tagap1  | Tagap1-201  | 0.0160523   | 1.37149     | 1.37149  |
| Tal1    | Tal1-003    | 0.0219817   | 0.145689    | -6.86393 |
| Tamm41  | Tamm41-005  | 0.024634    | 0.507995    | -1.96852 |
| Tamm41  | Tamm41-003  | 0.0229296   | 1.59703     | 1.59703  |
| Tanc1   | Tanc1-012   | 0.0103665   | 3.46598     | 3.46598  |
| Taok3   | Taok3-001   | 0.00769877  | 0.728316    | -1.37303 |
| Tardbp  | Tardbp-019  | 0.00746993  | 24.9092     | 24.9092  |
| Tars2   | Tars2-017   | 0.0449764   | 0.119147    | -8.39301 |
| Tars2   | Tars2-016   | 0.0490217   | 0.21956     | -4.55457 |
| Tatdn1  | Tatdn1-201  | 0.000611373 | 0.858986    | -1.16416 |
| Tatdn3  | Tatdn3-001  | 0.0322234   | 0.403885    | -2.47595 |
| Taz     | Taz-019     | 0.0150417   | 0.546368    | -1.83027 |
| Taz     | Taz-007     | 0.020123    | 2.96355     | 2.96355  |
| Tbc1d16 | Tbc1d16-001 | 0.036617    | 1.17212     | 1.17212  |
| Tbc1d17 | Tbc1d17-005 | 0.0262478   | 0.337934    | -2.95916 |
| Tbc1d24 | Tbc1d24-201 | 0.00251909  | 0.77658     | -1.2877  |
| Tbc1d24 | Tbc1d24-011 | 0.04423     | 0.164068    | -6.09503 |
| Tbc1d2b | Tbc1d2b-002 | 0.0156486   | 0.255969    | -3.90672 |
| Tbc1d5  | Tbc1d5-201  | 0.0275093   | 0.932453    | -1.07244 |
| Tbc1d8b | Tbc1d8b-001 | 0.0287765   | 0.851202    | -1.17481 |
| Tbl3    | Tbl3-002    | 0.00638432  | 1.26453     | 1.26453  |
| Tbp     | Tbp-009     | 0.0493443   | 1.71271     | 1.71271  |
| Tbxas1  | Tbxas1-002  | 0.0310359   | 0.504881    | -1.98067 |
| Tcam1   | Tcam1-002   | 0.049677    | 0.514772    | -1.94261 |
| Tcea2   | Tcea2-001   | 0.0455419   | 0.710168    | -1.40812 |
| Tceanc2 | Tceanc2-010 | 0.0425774   | 0.386052    | -2.59032 |
| Tceb1   | Tceb1-009   | 0.0477152   | 0.733589    | -1.36316 |
| Tceb1   | Tceb1-004   | 0.011497    | 15.611      | 15.611   |
| Tcf4    | Tcf4-201    | 0.0101901   | 0.853107    | -1.17219 |
| Tcf7l2  | Tcf7l2-007  | 0.0421369   | 32.8566     | 32.8566  |
| Tcf15   | Tcf15-001   | 0.0255683   | 5.99127     | 5.99127  |
| Tchp    | Tchp-005    | 0.00389055  | 0.00536988  | -186.224 |
| Tcp11   | Tcp11-005   | 0.0378746   | 6.21693     | 6.21693  |
| Tdp1    | Tdp1-201    | 0.0197406   | 1.83456     | 1.83456  |
| Tdp2    | Tdp2-002    | 0.0345917   | 9.81773     | 9.81773  |



|         |             |             |             |              |
|---------|-------------|-------------|-------------|--------------|
| Tead1   | Tead1-003   | 0.0159139   | 0.0705292   | -14.1785     |
| Tead2   | Tead2-004   | 0.0462149   | 4.45352e-06 | -224541      |
| Tead2   | Tead2-007   | 0.0469221   | 5.34089e+08 | 5.34089e+08  |
| Tead2   | Tead2-012   | 0.0492998   | 61.7467     | 61.7467      |
| Tead4   | Tead4-003   | 0.0314153   | 6.53884e+07 | 6.53884e+07  |
| Tecpr1  | Tecpr1-008  | 0.0290183   | 0.488135    | -2.04861     |
| Telo2   | Telo2-005   | 0.0317883   | 0.616421    | -1.62227     |
| Tenm4   | Tenm4-003   | 0.0487665   | 0.108012    | -9.25823     |
| Terf1   | Terf1-004   | 0.0171541   | 139.005     | 139.005      |
| Tesc    | Tesc-003    | 0.00990112  | 5.37647     | 5.37647      |
| Tex30   | Tex30-001   | 0.00370679  | 31.129      | 31.129       |
| Tex9    | Tex9-002    | 0.00262583  | 5.67702     | 5.67702      |
| Tex9    | Tex9-005    | 0.00414203  | 2.26189     | 2.26189      |
| Tex9    | Tex9-009    | 0.0123629   | 91.5765     | 91.5765      |
| Tfdp2   | Tfdp2-012   | 0.00575853  | 0.0305429   | -32.7408     |
| Tfg     | Tfg-004     | 0.0367541   | 9.669e-06   | -103423      |
| Tfip11  | Tfip11-004  | 0.0287832   | 0.104263    | -9.5911      |
| Tfpi    | Tfpi-002    | 0.0252131   | 5.96727     | 5.96727      |
| Tfr2    | Tfr2-004    | 0.0413595   | 0.410233    | -2.43764     |
| Tfr2    | Tfr2-005    | 0.0402041   | 978.36      | 978.36       |
| Tfrc    | Tfrc-001    | 0.0141754   | 0.85492     | -1.1697      |
| Tgfa    | Tgfa-001    | 0.0325934   | 1.3953      | 1.3953       |
| Tgfb1i1 | Tgfb1i1-006 | 0.0463889   | 0.0165464   | -60.436      |
| Tgif1   | Tgif1-003   | 0.0275146   | 0.0252255   | -39.6424     |
| Tgif1   | Tgif1-006   | 0.0284583   | 7.87104     | 7.87104      |
| Tgoln1  | Tgoln1-001  | 0.0336773   | 1.10061     | 1.10061      |
| Thap2   | Thap2-201   | 0.0208247   | 1.17081     | 1.17081      |
| Thap4   | Thap4-002   | 0.0156816   | 1.30836     | 1.30836      |
| Thbs3   | Thbs3-004   | 0.02875     | 3.54517     | 3.54517      |
| Thnsl2  | Thnsl2-002  | 0.0493271   | 0.528193    | -1.89325     |
| Thoc6   | Thoc6-007   | 0.0405624   | 8.6293e-07  | -1.15884e+06 |
| Thrap3  | Thrap3-005  | 0.0141187   | 0.174504    | -5.73053     |
| Thsd1   | Thsd1-002   | 0.0167102   | 0.506573    | -1.97405     |
| Thsd1   | Thsd1-003   | 0.0405874   | 2.36723     | 2.36723      |
| Tia1    | Tia1-018    | 0.000119217 | 0.0524164   | -19.078      |
| Tia1    | Tia1-016    | 0.0132225   | 0.541629    | -1.84628     |
| Tia1    | Tia1-005    | 0.0137218   | 0.753082    | -1.32788     |
| Tia1    | Tia1-022    | 0.0360966   | 4.28526     | 4.28526      |
| Tial1   | Tial1-012   | 0.0072982   | 0.131341    | -7.61374     |
| Tiam1   | Tiam1-003   | 0.0153713   | 2.13387     | 2.13387      |
| Tifab   | Tifab-201   | 0.02228     | 0.775252    | -1.2899      |
| Timm13  | Timm13-201  | 0.0362162   | 1.16695     | 1.16695      |
| Timm17a | Timm17a-001 | 0.0461199   | 0.94326     | -1.06015     |

|          |              |             |             |          |
|----------|--------------|-------------|-------------|----------|
| Timm17b  | Timm17b-003  | 0.0432139   | 2.03656     | 2.03656  |
| Timm22   | Timm22-002   | 0.0414168   | 1.63978     | 1.63978  |
| Timm23   | Timm23-006   | 0.010676    | 3.43474     | 3.43474  |
| Timm44   | Timm44-001   | 0.0232277   | 1.26462     | 1.26462  |
| Timm8a1  | Timm8a1-001  | 0.0156835   | 1.11587     | 1.11587  |
| Tinagl1  | Tinagl1-002  | 0.032011    | 5432.11     | 5432.11  |
| Tktl1    | Tktl1-001    | 0.03223     | 0.157831    | -6.3359  |
| Tldc1    | Tldc1-201    | 0.0431117   | 1.24499     | 1.24499  |
| Tle3     | Tle3-018     | 0.0372274   | 0.00293292  | -340.957 |
| Tle3     | Tle3-010     | 0.0170826   | 7.62543     | 7.62543  |
| Tlr6     | Tlr6-001     | 0.00993218  | 0.524055    | -1.9082  |
| Tm7sf3   | Tm7sf3-002   | 0.0394002   | 7738        | 7738     |
| Tm9sf1   | Tm9sf1-007   | 0.0116329   | 3.3669      | 3.3669   |
| Tmbim6   | Tmbim6-001   | 0.0389711   | 1.08235     | 1.08235  |
| Tmbim6   | Tmbim6-009   | 0.0495955   | 4.46295     | 4.46295  |
| Tmcc2    | Tmcc2-004    | 0.0462266   | 0.665714    | -1.50215 |
| Tmco5    | Tmco5-003    | 0.0131175   | 31.4529     | 31.4529  |
| Tmed3    | Tmed3-001    | 0.0485586   | 1.16637     | 1.16637  |
| Tmed4    | Tmed4-003    | 0.00683949  | 0.602826    | -1.65885 |
| Tmeff1   | Tmeff1-002   | 0.00415222  | 2.86478     | 2.86478  |
| Tmem100  | Tmem100-001  | 0.000287225 | 1.44762     | 1.44762  |
| Tmem116  | Tmem116-005  | 0.022205    | 0.15386     | -6.49942 |
| Tmem125  | Tmem125-005  | 0.0475352   | 4.31507e-06 | -231746  |
| Tmem132b | Tmem132b-001 | 0.000463175 | 0.892504    | -1.12044 |
| Tmem144  | Tmem144-001  | 0.0492446   | 0.766929    | -1.3039  |
| Tmem161a | Tmem161a-002 | 0.0482995   | 0.606755    | -1.64811 |
| Tmem161a | Tmem161a-012 | 0.0151302   | 5.04503     | 5.04503  |
| Tmem180  | Tmem180-004  | 0.0310364   | 2.53421     | 2.53421  |
| Tmem181a | Tmem181a-001 | 0.0329922   | 0.799818    | -1.25028 |
| Tmem196  | Tmem196-005  | 0.0481601   | 1.30805     | 1.30805  |
| Tmem202  | Tmem202-201  | 0.0165908   | 1.81436     | 1.81436  |
| Tmem210  | Tmem210-002  | 0.0304332   | 186.95      | 186.95   |
| Tmem229b | Tmem229b-003 | 0.0325771   | 1.64822     | 1.64822  |
| Tmem232  | Tmem232-201  | 0.0295934   | 3.6334      | 3.6334   |
| Tmem234  | Tmem234-010  | 0.0242059   | 0.713789    | -1.40097 |
| Tmem234  | Tmem234-009  | 0.0407076   | 1.23054     | 1.23054  |
| Tmem237  | Tmem237-002  | 0.0382427   | 0.360698    | -2.77241 |
| Tmem237  | Tmem237-004  | 0.0152917   | 3.47813     | 3.47813  |
| Tmem255a | Tmem255a-002 | 0.00555879  | 0.540869    | -1.84888 |
| Tmem29   | Tmem29-002   | 0.0123958   | 0.624295    | -1.60181 |
| Tmem37   | Tmem37-001   | 0.0295352   | 1.75043     | 1.75043  |
| Tmem40   | Tmem40-004   | 0.0347415   | 2.63215     | 2.63215  |
| Tmem41b  | Tmem41b-001  | 0.0059159   | 0.777789    | -1.2857  |

|           |               |             |             |              |
|-----------|---------------|-------------|-------------|--------------|
| Tmem59l   | Tmem59l-201   | 0.00417044  | 0.822997    | -1.21507     |
| Tmem64    | Tmem64-001    | 0.0370879   | 1.13305     | 1.13305      |
| Tmem72    | Tmem72-001    | 0.0112327   | 11.139      | 11.139       |
| Tmem8     | Tmem8-001     | 0.00504287  | 1.22388     | 1.22388      |
| Tmem82    | Tmem82-002    | 0.0473165   | 1.92816     | 1.92816      |
| Tmem8b    | Tmem8b-002    | 0.00429448  | 1.43931     | 1.43931      |
| Tmem91    | Tmem91-001    | 0.0192987   | 2.15638     | 2.15638      |
| Tmem98    | Tmem98-001    | 0.0432587   | 1.5655      | 1.5655       |
| Tmie      | Tmie-001      | 0.04588     | 1.44841     | 1.44841      |
| Tmod3     | Tmod3-201     | 0.0273115   | 1.14296     | 1.14296      |
| Tmprss11a | Tmprss11a-002 | 0.00217692  | 9.79107     | 9.79107      |
| Tmprss11a | Tmprss11a-001 | 0.0279482   | 30.4489     | 30.4489      |
| Tmsb15l   | Tmsb15l-201   | 0.00114941  | 0.249427    | -4.00918     |
| Tmtc1     | Tmtc1-003     | 0.0330536   | 1.44895     | 1.44895      |
| Tmtc3     | Tmtc3-001     | 0.0172155   | 1.17598     | 1.17598      |
| Tmub2     | Tmub2-003     | 0.0300878   | 0.812039    | -1.23147     |
| Tnfaip2   | Tnfaip2-008   | 0.0354855   | 3.8873e-05  | -25724.8     |
| Tnfaip8   | Tnfaip8-001   | 0.0199154   | 1.97407     | 1.97407      |
| Tnfaip8l3 | Tnfaip8l3-201 | 0.0151961   | 0.801439    | -1.24776     |
| Tnfrsf11b | Tnfrsf11b-201 | 0.0210704   | 1.36639     | 1.36639      |
| Tnfsf13os | Tnfsf13os-001 | 0.00279726  | 7.05189     | 7.05189      |
| Tnip1     | Tnip1-011     | 0.0382862   | 7.32345     | 7.32345      |
| Tnip2     | Tnip2-007     | 0.0200904   | 0.61013     | -1.63899     |
| Tnk1      | Tnk1-002      | 0.0473604   | 24.9798     | 24.9798      |
| Tnks1bp1  | Tnks1bp1-003  | 0.0371456   | 0.823228    | -1.21473     |
| Tnmd      | Tnmd-001      | 0.0277309   | 5.83661     | 5.83661      |
| Tnni3     | Tnni3-007     | 0.00469156  | 7.35427     | 7.35427      |
| Tnr       | Tnr-001       | 0.0206568   | 0.883005    | -1.1325      |
| Tnrc6a    | Tnrc6a-005    | 0.00133472  | 1.84189     | 1.84189      |
| Tnrc6c    | Tnrc6c-001    | 0.0204169   | 0.749684    | -1.33389     |
| Tns1      | Tns1-201      | 0.0143584   | 1.47763     | 1.47763      |
| Tns1      | Tns1-008      | 0.0439195   | 1.55652     | 1.55652      |
| Top3b     | Top3b-005     | 0.00509584  | 0.091822    | -10.8906     |
| Topbp1    | Topbp1-003    | 8.52017e-05 | 0.00752711  | -132.853     |
| Topbp1    | Topbp1-001    | 0.0205209   | 0.911584    | -1.09699     |
| Tor2a     | Tor2a-001     | 0.046839    | 0.845333    | -1.18297     |
| Tpd52     | Tpd52-011     | 0.0312419   | 1.71366     | 1.71366      |
| Tpd52l2   | Tpd52l2-011   | 0.00746799  | 7.43699e-10 | -1.34463e+09 |
| Tpd52l2   | Tpd52l2-001   | 0.0438655   | 2.00992     | 2.00992      |
| Tpra1     | Tpra1-013     | 0.0481366   | 2.33304     | 2.33304      |
| Tprkb     | Tprkb-002     | 0.0382788   | 0.564921    | -1.77016     |
| Tpst1     | Tpst1-002     | 0.0371428   | 0.75297     | -1.32807     |
| Tpst1     | Tpst1-001     | 0.00249302  | 1.40903     | 1.40903      |

|           |               |             |           |          |
|-----------|---------------|-------------|-----------|----------|
| Tpt1      | Tpt1-003      | 0.0326427   | 0.37252   | -2.68442 |
| Tra2b     | Tra2b-002     | 0.0207813   | 1.37351   | 1.37351  |
| Traf1     | Traf1-006     | 0.0482096   | 5.96023   | 5.96023  |
| Traf2     | Traf2-003     | 0.0491588   | 1.41773   | 1.41773  |
| Traf3ip1  | Traf3ip1-001  | 0.0140152   | 1.30606   | 1.30606  |
| Traf3ip3  | Traf3ip3-014  | 0.0463413   | 9.80917   | 9.80917  |
| Traf7     | Traf7-011     | 0.0343524   | 0.101518  | -9.85048 |
| Traf7     | Traf7-019     | 0.0406263   | 3.67284   | 3.67284  |
| Traip     | Traip-003     | 0.0466618   | 1.87671   | 1.87671  |
| Trak2     | Trak2-001     | 0.0383219   | 1.08324   | 1.08324  |
| Tram2     | Tram2-001     | 0.0302254   | 1.48983   | 1.48983  |
| Trappc1   | Trappc1-002   | 0.0432053   | 0.825639  | -1.21118 |
| Trappc6a  | Trappc6a-005  | 0.00482493  | 0.542652  | -1.8428  |
| Trhr      | Trhr-201      | 0.028033    | 0.709925  | -1.4086  |
| Trhr2     | Trhr2-001     | 0.0282193   | 5.66293   | 5.66293  |
| Trib2     | Trib2-001     | 0.0269922   | 1.25432   | 1.25432  |
| Trib3     | Trib3-001     | 0.0309891   | 1.75952   | 1.75952  |
| Trim33    | Trim33-007    | 0.0293669   | 0.346954  | -2.88223 |
| Trim43b   | Trim43b-201   | 0.0244896   | 0.653719  | -1.52971 |
| Trim44    | Trim44-001    | 0.0216732   | 0.967044  | -1.03408 |
| Trim46    | Trim46-006    | 0.0329402   | 298.235   | 298.235  |
| Trim56    | Trim56-001    | 0.0276065   | 1.26779   | 1.26779  |
| Triobp    | Triobp-008    | 0.000601918 | 360.541   | 360.541  |
| Trip12    | Trip12-011    | 0.00350876  | 5.558     | 5.558    |
| Trmt1     | Trmt1-030     | 0.00724751  | 0.0560317 | -17.847  |
| Trmt10a   | Trmt10a-005   | 0.0144414   | 0.29088   | -3.43784 |
| Trmt2a    | Trmt2a-010    | 0.00104797  | 0.354227  | -2.82305 |
| Trmt6     | Trmt6-003     | 0.0152891   | 0.440662  | -2.26931 |
| Trmt61a   | Trmt61a-202   | 0.0409808   | 2.83463   | 2.83463  |
| Trnau1ap  | Trnau1ap-002  | 0.0276756   | 0.759004  | -1.31752 |
| Tro       | Tro-006       | 0.0329445   | 33.7799   | 33.7799  |
| Trp53inp2 | Trp53inp2-001 | 0.0114975   | 1.12384   | 1.12384  |
| Trpc4     | Trpc4-001     | 0.0245052   | 0.697295  | -1.43411 |
| Trpm3     | Trpm3-205     | 0.0140713   | 14.6134   | 14.6134  |
| Trpm6     | Trpm6-201     | 0.0405739   | 1.7619    | 1.7619   |
| Trpt1     | Trpt1-201     | 0.0435524   | 1.23645   | 1.23645  |
| Trpv4     | Trpv4-005     | 0.00554758  | 40.622    | 40.622   |
| Tsacc     | Tsacc-001     | 0.0363131   | 0.213605  | -4.68154 |
| Tsen2     | Tsen2-002     | 0.0278891   | 0.589165  | -1.69732 |
| Tsg101    | Tsg101-003    | 0.0269748   | 6.6382    | 6.6382   |
| Tshz1     | Tshz1-001     | 0.0332207   | 1.35198   | 1.35198  |
| Tspan13   | Tspan13-001   | 0.0403097   | 0.872157  | -1.14658 |
| Tspan31   | Tspan31-201   | 0.0131877   | 1.15308   | 1.15308  |

|         |             |             |            |              |
|---------|-------------|-------------|------------|--------------|
| Tspan32 | Tspan32-003 | 0.0316198   | 0.00667577 | -149.795     |
| Tstd2   | Tstd2-006   | 0.0417213   | 2.65151    | 2.65151      |
| Ttc13   | Ttc13-001   | 0.000349238 | 0.429269   | -2.32954     |
| Ttc13   | Ttc13-003   | 0.0181257   | 1.39985    | 1.39985      |
| Ttc14   | Ttc14-003   | 0.0101357   | 8.8699e-10 | -1.12741e+09 |
| Ttc14   | Ttc14-011   | 0.0405252   | 4.27797    | 4.27797      |
| Ttc16   | Ttc16-001   | 0.0413414   | 0.0111997  | -89.2878     |
| Ttc3    | Ttc3-001    | 0.0352614   | 0.945531   | -1.05761     |
| Ttc39a  | Ttc39a-001  | 0.0350597   | 1.93342    | 1.93342      |
| Ttc4    | Ttc4-002    | 0.00360417  | 2.51141    | 2.51141      |
| Ttc4    | Ttc4-008    | 0.0496357   | 85.5861    | 85.5861      |
| Ttc9c   | Ttc9c-003   | 0.0379987   | 0.592362   | -1.68816     |
| Ttll11  | Ttll11-201  | 0.0349574   | 0.751088   | -1.3314      |
| Ttll12  | Ttll12-002  | 0.00222377  | 2.12167    | 2.12167      |
| Ttll2   | Ttll2-201   | 0.000342157 | 0.260369   | -3.84071     |
| Ttll5   | Ttll5-012   | 0.0312068   | 0.354241   | -2.82294     |
| Ttll5   | Ttll5-013   | 0.0370457   | 2.19385    | 2.19385      |
| Ttr     | Ttr-201     | 0.0364316   | 30.5773    | 30.5773      |
| Ttyh3   | Ttyh3-002   | 0.0190285   | 1.27021    | 1.27021      |
| Tuba4a  | Tuba4a-003  | 0.0141263   | 1.16686    | 1.16686      |
| Tubgcp2 | Tubgcp2-201 | 0.0318515   | 0.909411   | -1.09961     |
| Tug1    | Tug1-003    | 0.0464925   | 0.763719   | -1.30938     |
| Tug1    | Tug1-001    | 0.0165394   | 1.36111    | 1.36111      |
| Tulp3   | Tulp3-003   | 0.0228458   | 0.244807   | -4.08485     |
| Tulp4   | Tulp4-003   | 0.00667848  | 1.88942    | 1.88942      |
| Twistnb | Twistnb-201 | 0.0415702   | 0.852759   | -1.17266     |
| Txndc11 | Txndc11-003 | 0.010181    | 2.08582    | 2.08582      |
| Txndc5  | Txndc5-002  | 0.000405236 | 2.78629    | 2.78629      |
| Tyro3   | Tyro3-007   | 0.0498691   | 0.18508    | -5.40308     |
| Tyro3   | Tyro3-002   | 0.00795828  | 1.22106    | 1.22106      |
| Tyro3   | Tyro3-003   | 0.0189514   | 1.64302    | 1.64302      |
| Tyrp1   | Tyrp1-003   | 0.0428134   | 45307.7    | 45307.7      |
| Tysnd1  | Tysnd1-201  | 0.0367023   | 1.13698    | 1.13698      |
| Uba2    | Uba2-002    | 0.00571676  | 2.97122    | 2.97122      |
| Uba3    | Uba3-004    | 0.0308614   | 2.4209     | 2.4209       |
| Uba52   | Uba52-003   | 0.0265786   | 0.686601   | -1.45645     |
| Uba7    | Uba7-004    | 0.0158163   | 0.0976865  | -10.2368     |
| Ubp2l   | Ubp2l-008   | 0.0414888   | 0.365328   | -2.73727     |
| Ube2b   | Ube2b-003   | 0.0210871   | 1.39877    | 1.39877      |
| Ube2d3  | Ube2d3-010  | 0.0277418   | 0.236856   | -4.22198     |
| Ube2d3  | Ube2d3-002  | 0.0495925   | 1.16152    | 1.16152      |
| Ube2e3  | Ube2e3-004  | 0.00985555  | 0.0143566  | -69.6544     |
| Ube2k   | Ube2k-008   | 0.0421007   | 3.46358    | 3.46358      |

|           |               |            |             |              |
|-----------|---------------|------------|-------------|--------------|
| Ube2l6    | Ube2l6-003    | 0.0306336  | 1.30526e-08 | -7.66132e+07 |
| Ube2m     | Ube2m-002     | 0.0270752  | 0.187949    | -5.3206      |
| Ube2q1    | Ube2q1-002    | 0.036214   | 0.936457    | -1.06785     |
| Ube2u     | Ube2u-001     | 0.0444804  | 0.0786978   | -12.7068     |
| Ube2v1    | Ube2v1-007    | 0.0208     | 3.61842     | 3.61842      |
| Ube3a     | Ube3a-016     | 0.001498   | 4.42433     | 4.42433      |
| Ube3a     | Ube3a-003     | 0.0298129  | 1.50021     | 1.50021      |
| Ube3b     | Ube3b-003     | 0.0248166  | 3.72386     | 3.72386      |
| Ube4a     | Ube4a-002     | 0.026436   | 1.74675     | 1.74675      |
| Ube4b     | Ube4b-002     | 0.0388078  | 1.44074     | 1.44074      |
| Ube4bos2  | Ube4bos2-001  | 0.00604111 | 7.96253     | 7.96253      |
| Ubfd1     | Ubfd1-001     | 0.024438   | 1.04574     | 1.04574      |
| Ubiad1    | Ubiad1-001    | 0.0277586  | 1.13499     | 1.13499      |
| Ubl3      | Ubl3-002      | 0.0198868  | 1.68285     | 1.68285      |
| Ubn2      | Ubn2-008      | 0.0168179  | 0.0129788   | -77.049      |
| Ubr3      | Ubr3-008      | 0.0319692  | 0.621086    | -1.61008     |
| Ubxn10    | Ubxn10-002    | 0.0341866  | 2.62048     | 2.62048      |
| Ubxn6     | Ubxn6-004     | 0.0109577  | 1.27476     | 1.27476      |
| Uchl5     | Uchl5-008     | 0.0352475  | 0.448587    | -2.22922     |
| Uckl1     | Uckl1-016     | 0.0099672  | 0.165895    | -6.02791     |
| Uckl1     | Uckl1-015     | 0.0107356  | 5.71566     | 5.71566      |
| Ufd1l     | Ufd1l-201     | 0.0289745  | 0.923206    | -1.08318     |
| Ufsp2     | Ufsp2-001     | 0.00060233 | 0.630951    | -1.58491     |
| Ugdh      | Ugdh-003      | 0.0284675  | 5.01027     | 5.01027      |
| Uggt2     | Uggt2-006     | 0.0357678  | 2.88098     | 2.88098      |
| Uhrf1bp1l | Uhrf1bp1l-201 | 0.0280478  | 0.927278    | -1.07843     |
| Ulk1      | Ulk1-011      | 0.00153983 | 5313.2      | 5313.2       |
| Umad1     | Umad1-006     | 0.00138302 | 6.22956     | 6.22956      |
| Umodl1    | Umodl1-201    | 0.00821146 | 0.0437687   | -22.8474     |
| Unc13b    | Unc13b-013    | 0.0207864  | 0.601413    | -1.66275     |
| Unc45a    | Unc45a-007    | 0.0252414  | 0.550408    | -1.81683     |
| Unk       | Unk-003       | 0.0362438  | 1.98209     | 1.98209      |
| Upp2      | Upp2-001      | 0.0125315  | 0.644923    | -1.55057     |
| Uqcc1     | Uqcc1-011     | 0.0370811  | 0.164377    | -6.08359     |
| Uqcc1     | Uqcc1-012     | 0.0267217  | 1.86969     | 1.86969      |
| Urb1      | Urb1-001      | 0.0485733  | 0.000669482 | -1493.69     |
| Uri1      | Uri1-001      | 0.0110451  | 0.735027    | -1.36049     |
| Urod      | Urod-005      | 0.0441131  | 8.66029     | 8.66029      |
| Uros      | Uros-002      | 0.0399861  | 2.42608     | 2.42608      |
| Use1      | Use1-010      | 0.026502   | 0.547048    | -1.82799     |
| Use1      | Use1-004      | 0.0407888  | 3.94529     | 3.94529      |
| Usp10     | Usp10-002     | 0.047735   | 0.269767    | -3.7069      |
| Usp19     | Usp19-001     | 0.0106268  | 1.55919     | 1.55919      |

|             |                 |             |             |             |
|-------------|-----------------|-------------|-------------|-------------|
| Usp19       | Usp19-007       | 0.0334086   | 1.864e+09   | 1.864e+09   |
| Usp21       | Usp21-002       | 0.0348783   | 1.96399     | 1.96399     |
| Usp32       | Usp32-003       | 0.0121664   | 1.31535     | 1.31535     |
| Usp36       | Usp36-003       | 0.00976049  | 3.9224      | 3.9224      |
| Usp36       | Usp36-005       | 0.00212509  | 3.74197     | 3.74197     |
| Usp50       | Usp50-003       | 0.0485194   | 0.512935    | -1.94957    |
| Usp53       | Usp53-003       | 0.000717303 | 0.0574756   | -17.3987    |
| Usp7        | Usp7-013        | 0.0114493   | 4.32741     | 4.32741     |
| Uspl1       | Uspl1-011       | 0.0263631   | 1.36567     | 1.36567     |
| Utp14a      | Utp14a-002      | 0.0472043   | 1.40081     | 1.40081     |
| Utp14b      | Utp14b-002      | 0.0265056   | 0.30586     | -3.26947    |
| Utp15       | Utp15-201       | 0.01576     | 0.925013    | -1.08107    |
| Utp18       | Utp18-001       | 0.000478184 | 0.764378    | -1.30825    |
| Utp23       | Utp23-004       | 0.0459663   | 1.03368e+07 | 1.03368e+07 |
| Utrn        | Utrn-201        | 0.0331839   | 1.22447     | 1.22447     |
| Vamp4       | Vamp4-007       | 0.0325978   | 3.59157e-06 | -278429     |
| Vamp5       | Vamp5-001       | 0.0454423   | 0.38051     | -2.62805    |
| Vamp5       | Vamp5-003       | 0.0203245   | 2.60289     | 2.60289     |
| Vangl2      | Vangl2-001      | 0.0333678   | 0.851707    | -1.17411    |
| Vars        | Vars-012        | 0.0348421   | 0.00230724  | -433.418    |
| Vars2       | Vars2-003       | 0.010797    | 1.88973     | 1.88973     |
| Vat1l       | Vat1l-001       | 0.00911914  | 2.97467     | 2.97467     |
| Vcan        | Vcan-003        | 0.00255166  | 2.77456     | 2.77456     |
| Vcpip1      | Vcpip1-001      | 0.0176577   | 0.929385    | -1.07598    |
| Vegfa       | Vegfa-001       | 0.0113534   | 1.29813     | 1.29813     |
| VeZF1       | VeZF1-001       | 0.0150129   | 1.20144     | 1.20144     |
| VeZt        | VeZt-011        | 0.0124906   | 0.00598247  | -167.155    |
| VeZt        | VeZt-002        | 0.0372142   | 1.36366     | 1.36366     |
| Vldlr       | Vldlr-001       | 0.00728839  | 1.08358     | 1.08358     |
| Vma21       | Vma21-001       | 0.0361741   | 0.840614    | -1.18961    |
| Vma21       | Vma21-002       | 0.00715497  | 2.65328     | 2.65328     |
| Vmn1r-ps128 | Vmn1r-ps128-001 | 0.0270117   | 1.78396     | 1.78396     |
| Vpreb2      | Vpreb2-201      | 0.018026    | 0.000113576 | -8804.7     |
| Vps25       | Vps25-007       | 0.0331639   | 0.244437    | -4.09103    |
| Vps29       | Vps29-007       | 0.0458233   | 1.71184     | 1.71184     |
| Vps33a      | Vps33a-002      | 0.0389523   | 37.2842     | 37.2842     |
| Vps39       | Vps39-009       | 0.0302785   | 0.160779    | -6.21971    |
| Vps52       | Vps52-007       | 0.0245326   | 0.547668    | -1.82592    |
| Vps52       | Vps52-001       | 0.0487243   | 1.10353     | 1.10353     |
| Vps53       | Vps53-011       | 0.00410004  | 0.10489     | -9.53379    |
| Vps53       | Vps53-001       | 0.0233116   | 0.822635    | -1.21561    |
| Vps9d1      | Vps9d1-004      | 0.0425051   | 1.48554     | 1.48554     |
| Vps9d1      | Vps9d1-008      | 0.0246693   | 1.64608     | 1.64608     |

|         |             |             |             |             |
|---------|-------------|-------------|-------------|-------------|
| Vsig1   | Vsig1-002   | 0.0306227   | 0.0489477   | -20.4299    |
| Vstm2a  | Vstm2a-002  | 0.0204756   | 0.873254    | -1.14514    |
| Vta1    | Vta1-006    | 0.0419392   | 0.643979    | -1.55285    |
| Vti1b   | Vti1b-004   | 0.0224477   | 1.32187     | 1.32187     |
| Vwa5b1  | Vwa5b1-005  | 0.0472489   | 6.27324     | 6.27324     |
| Vwc2    | Vwc2-201    | 0.047693    | 1.48896     | 1.48896     |
| Vwf     | Vwf-011     | 0.00742517  | 3.42836     | 3.42836     |
| Was     | Was-001     | 0.0239348   | 1.49158     | 1.49158     |
| Wash1   | Wash1-202   | 0.025358    | 0.763277    | -1.31014    |
| Wash1   | Wash1-201   | 0.0284665   | 1.43068     | 1.43068     |
| Wbscr17 | Wbscr17-001 | 0.0313138   | 0.863254    | -1.15841    |
| Wbscr22 | Wbscr22-009 | 0.0382949   | 2.68046     | 2.68046     |
| Wdr1    | Wdr1-008    | 0.03127     | 0.000102868 | -9721.24    |
| Wdr26   | Wdr26-005   | 0.0415118   | 2.27605     | 2.27605     |
| Wdr31   | Wdr31-001   | 0.0487625   | 0.491239    | -2.03567    |
| Wdr33   | Wdr33-201   | 0.0290128   | 1.08369     | 1.08369     |
| Wdr37   | Wdr37-201   | 0.0111563   | 0.75759     | -1.31997    |
| Wdr4    | Wdr4-004    | 0.0129063   | 5.23327     | 5.23327     |
| Wdr44   | Wdr44-004   | 0.0478387   | 0.181178    | -5.51945    |
| Wdr45   | Wdr45-007   | 0.0364477   | 8.59339     | 8.59339     |
| Wdr49   | Wdr49-001   | 0.0241326   | 2.68558     | 2.68558     |
| Wdr5    | Wdr5-002    | 0.000695234 | 8.22792e+10 | 8.22792e+10 |
| Wdr7    | Wdr7-201    | 0.000501686 | 0.884811    | -1.13019    |
| Wdr70   | Wdr70-201   | 0.00230882  | 0.808309    | -1.23715    |
| Wdr73   | Wdr73-007   | 0.0179384   | 4.52692     | 4.52692     |
| Wdr78   | Wdr78-005   | 0.0317979   | 1.91324     | 1.91324     |
| Wdsub1  | Wdsub1-009  | 0.0221597   | 2.84086     | 2.84086     |
| Wfdc2   | Wfdc2-004   | 0.00645163  | 15.9214     | 15.9214     |
| Wfikkn1 | Wfikkn1-001 | 0.0142083   | 0.226911    | -4.40701    |
| Whrn    | Whrn-009    | 0.037695    | 1.87639     | 1.87639     |
| Whrn    | Whrn-010    | 0.014532    | 3.24985     | 3.24985     |
| Whsc1l1 | Whsc1l1-008 | 0.0204806   | 0.674036    | -1.4836     |
| Wiz     | Wiz-009     | 0.00664497  | 2.55951     | 2.55951     |
| Wls     | Wls-001     | 0.00456157  | 1.52877     | 1.52877     |
| Wnk1    | Wnk1-201    | 0.00737514  | 0.617416    | -1.61965    |
| Wnk1    | Wnk1-005    | 0.0227277   | 2.19784     | 2.19784     |
| Wnk2    | Wnk2-203    | 0.0247479   | 0.527476    | -1.89582    |
| Wnk2    | Wnk2-204    | 0.0247282   | 0.454227    | -2.20154    |
| Wnk2    | Wnk2-202    | 0.00801416  | 1.42402     | 1.42402     |
| Wnk3    | Wnk3-002    | 0.0437273   | 0.388576    | -2.5735     |
| Wnk4    | Wnk4-005    | 0.0426876   | 16.436      | 16.436      |
| Wnt10b  | Wnt10b-202  | 0.0395989   | 0.0295604   | -33.829     |
| Wnt3    | Wnt3-001    | 0.0365443   | 0.704533    | -1.41938    |



|           |               |            |            |          |
|-----------|---------------|------------|------------|----------|
| Wnt9a     | Wnt9a-201     | 0.0231664  | 0.591511   | -1.69059 |
| Xpnpep2   | Xpnpep2-002   | 0.0378439  | 0.222407   | -4.49627 |
| Xrcc1     | Xrcc1-010     | 0.0391135  | 0.0473445  | -21.1218 |
| Xrcc1     | Xrcc1-001     | 0.0372572  | 0.0361124  | -27.6913 |
| Xrcc6bp1  | Xrcc6bp1-202  | 0.0356077  | 1.24101    | 1.24101  |
| Ybey      | Ybey-201      | 0.0191289  | 0.813181   | -1.22974 |
| Ybx2      | Ybx2-002      | 0.0242123  | 0.180524   | -5.53942 |
| Yipf1     | Yipf1-009     | 0.0102483  | 0.00254514 | -392.905 |
| Yipf3     | Yipf3-006     | 0.0173502  | 13.3797    | 13.3797  |
| Yipf3     | Yipf3-003     | 0.00760682 | 2.43243    | 2.43243  |
| Yod1      | Yod1-001      | 0.021366   | 0.884998   | -1.12995 |
| Ypel1     | Ypel1-004     | 0.024577   | 0.583558   | -1.71363 |
| Ywhaq     | Ywhaq-003     | 0.0253445  | 1.2885     | 1.2885   |
| Zbtb11    | Zbtb11-003    | 0.0215991  | 2.80317    | 2.80317  |
| Zbtb17    | Zbtb17-003    | 0.0426547  | 0.589282   | -1.69698 |
| Zbtb17    | Zbtb17-001    | 0.0188665  | 1.21146    | 1.21146  |
| Zbtb18    | Zbtb18-009    | 0.0124755  | 0.803235   | -1.24497 |
| Zbtb33    | Zbtb33-201    | 0.0449711  | 0.922045   | -1.08455 |
| Zbtb38    | Zbtb38-005    | 0.0324828  | 1.97486    | 1.97486  |
| Zbtb48    | Zbtb48-001    | 0.033156   | 0.0581192  | -17.206  |
| Zbtb49    | Zbtb49-010    | 0.0415651  | 0.420598   | -2.37757 |
| Zbtb5     | Zbtb5-002     | 0.0385851  | 1.53812    | 1.53812  |
| Zbtb7a    | Zbtb7a-001    | 0.014671   | 1.13       | 1.13     |
| Zc2hc1c   | Zc2hc1c-001   | 0.0425466  | 1.33917    | 1.33917  |
| Zc3h12b   | Zc3h12b-002   | 0.0353568  | 0.899314   | -1.11196 |
| Zc3hav1l  | Zc3hav1l-001  | 0.00146053 | 0.851254   | -1.17474 |
| Zc3hc1    | Zc3hc1-002    | 0.0377655  | 0.664772   | -1.50428 |
| Zc3hc1    | Zc3hc1-004    | 0.0118638  | 2.62957    | 2.62957  |
| Zc3hc1    | Zc3hc1-009    | 0.0463275  | 3.89513    | 3.89513  |
| Zcchc9-ps | Zcchc9-ps-001 | 0.0358262  | 0.176297   | -5.67225 |
| Zcrb1     | Zcrb1-008     | 0.0309079  | 0.632407   | -1.58126 |
| Zdhhc15   | Zdhhc15-001   | 0.026419   | 0.84359    | -1.18541 |
| Zeb2      | Zeb2-001      | 0.00989178 | 0.759359   | -1.3169  |
| Zeb2      | Zeb2-019      | 0.0304011  | 41.1714    | 41.1714  |
| Zer1      | Zer1-002      | 0.0374583  | 0.81242    | -1.23089 |
| Zfand1    | Zfand1-005    | 0.00919609 | 0.610489   | -1.63803 |
| Zfand5    | Zfand5-001    | 0.0483054  | 0.922139   | -1.08444 |
| Zfp11     | Zfp11-001     | 0.0107528  | 0.83334    | -1.19999 |
| Zfp12     | Zfp12-003     | 0.0484344  | 1.4052     | 1.4052   |
| Zfp133-ps | Zfp133-ps-004 | 0.0339565  | 3.616      | 3.616    |
| Zfp180    | Zfp180-001    | 0.0255207  | 1.51932    | 1.51932  |
| Zfp191    | Zfp191-001    | 0.0268565  | 1.08541    | 1.08541  |
| Zfp260    | Zfp260-002    | 0.0192843  | 0.856106   | -1.16808 |

|         |             |             |             |             |
|---------|-------------|-------------|-------------|-------------|
| Zfp266  | Zfp266-201  | 0.0341456   | 0.234677    | -4.26117    |
| Zfp276  | Zfp276-006  | 0.0361669   | 0.436065    | -2.29324    |
| Zfp280c | Zfp280c-005 | 0.00102019  | 0.114514    | -8.73257    |
| Zfp281  | Zfp281-002  | 0.00873201  | 0.823835    | -1.21384    |
| Zfp287  | Zfp287-004  | 0.0378438   | 0.438598    | -2.27999    |
| Zfp30   | Zfp30-003   | 0.039866    | 0.618621    | -1.6165     |
| Zfp317  | Zfp317-201  | 0.0489373   | 0.867374    | -1.1529     |
| Zfp322a | Zfp322a-004 | 0.0134104   | 2.29478     | 2.29478     |
| Zfp346  | Zfp346-006  | 0.00320149  | 4.14878     | 4.14878     |
| Zfp354a | Zfp354a-002 | 0.0213801   | 4.72861     | 4.72861     |
| Zfp384  | Zfp384-004  | 0.0440897   | 0.245407    | -4.07486    |
| Zfp384  | Zfp384-014  | 0.0311102   | 228.812     | 228.812     |
| Zfp407  | Zfp407-005  | 0.00330388  | 0.25794     | -3.87688    |
| Zfp414  | Zfp414-002  | 0.0385799   | 0.591529    | -1.69053    |
| Zfp423  | Zfp423-006  | 0.0288604   | 0.133508    | -7.49019    |
| Zfp449  | Zfp449-001  | 0.0315048   | 1.27229     | 1.27229     |
| Zfp451  | Zfp451-007  | 0.0261463   | 15.6521     | 15.6521     |
| Zfp454  | Zfp454-001  | 0.00186282  | 2.97503     | 2.97503     |
| Zfp456  | Zfp456-001  | 0.0102897   | 1.47103     | 1.47103     |
| Zfp46   | Zfp46-005   | 0.0312235   | 0.5716      | -1.74947    |
| Zfp46   | Zfp46-002   | 0.0420989   | 3.03895e+07 | 3.03895e+07 |
| Zfp467  | Zfp467-005  | 0.0273475   | 0.34238     | -2.92073    |
| Zfp467  | Zfp467-001  | 0.0281203   | 1.89564     | 1.89564     |
| Zfp503  | Zfp503-001  | 0.0474779   | 1.31373     | 1.31373     |
| Zfp512  | Zfp512-007  | 0.00878089  | 0.740333    | -1.35074    |
| Zfp516  | Zfp516-202  | 0.0227203   | 1.34574     | 1.34574     |
| Zfp518a | Zfp518a-201 | 0.0429977   | 0.818583    | -1.22162    |
| Zfp52   | Zfp52-201   | 0.00373124  | 1.33866     | 1.33866     |
| Zfp532  | Zfp532-001  | 0.0497455   | 0.459695    | -2.17536    |
| Zfp563  | Zfp563-002  | 0.0414508   | 4.41281e+07 | 4.41281e+07 |
| Zfp568  | Zfp568-001  | 0.0476051   | 1.30714     | 1.30714     |
| Zfp574  | Zfp574-002  | 0.045393    | 1.12068     | 1.12068     |
| Zfp58   | Zfp58-004   | 0.0442891   | 10.2074     | 10.2074     |
| Zfp598  | Zfp598-201  | 0.00273364  | 1.22847     | 1.22847     |
| Zfp608  | Zfp608-201  | 0.000393283 | 0.750779    | -1.33195    |
| Zfp638  | Zfp638-017  | 0.0494009   | 5.05984     | 5.05984     |
| Zfp644  | Zfp644-201  | 0.0482815   | 0.822509    | -1.21579    |
| Zfp672  | Zfp672-001  | 0.0496803   | 0.781865    | -1.27899    |
| Zfp688  | Zfp688-002  | 0.00570142  | 0.495565    | -2.0179     |
| Zfp69   | Zfp69-201   | 0.00781265  | 0.165825    | -6.03046    |
| Zfp697  | Zfp697-001  | 0.0173651   | 0.741609    | -1.34842    |
| Zfp704  | Zfp704-003  | 0.0244921   | 2.59973     | 2.59973     |
| Zfp707  | Zfp707-001  | 0.0286355   | 3.50291     | 3.50291     |

|          |              |             |            |          |
|----------|--------------|-------------|------------|----------|
| Zfp710   | Zfp710-004   | 0.0472051   | 2.27263    | 2.27263  |
| Zfp759   | Zfp759-201   | 0.0151767   | 0.824421   | -1.21297 |
| Zfp770   | Zfp770-001   | 0.00622012  | 0.892907   | -1.11994 |
| Zfp804b  | Zfp804b-001  | 0.0210918   | 0.242377   | -4.1258  |
| Zfp804b  | Zfp804b-201  | 0.000311318 | 6.80011    | 6.80011  |
| Zfp810   | Zfp810-201   | 0.0334272   | 0.848635   | -1.17836 |
| Zfp85    | Zfp85-201    | 0.0243994   | 0.671042   | -1.49022 |
| Zfp868   | Zfp868-001   | 0.00871461  | 1.2678     | 1.2678   |
| Zfp9     | Zfp9-001     | 0.00400173  | 0.910499   | -1.0983  |
| Zfp91    | Zfp91-003    | 0.036556    | 15.5956    | 15.5956  |
| Zfp93    | Zfp93-001    | 0.0241081   | 0.605002   | -1.65289 |
| Zfp932   | Zfp932-005   | 0.000589797 | 16.6381    | 16.6381  |
| Zfp940   | Zfp940-002   | 0.0182397   | 0.705882   | -1.41667 |
| Zfp945   | Zfp945-201   | 0.0469187   | 0.834782   | -1.19792 |
| Zfp945   | Zfp945-001   | 0.029207    | 0.511577   | -1.95474 |
| Zfp945   | Zfp945-002   | 0.0314849   | 1482.1     | 1482.1   |
| Zfp946   | Zfp946-002   | 0.0300361   | 2.55707    | 2.55707  |
| Zfp950   | Zfp950-007   | 0.0127939   | 0.143221   | -6.98224 |
| Zfp950   | Zfp950-202   | 0.036725    | 0.00653858 | -152.938 |
| Zfpm2    | Zfpm2-201    | 0.00428239  | 0.784478   | -1.27473 |
| Zfr      | Zfr-001      | 0.013451    | 0.921986   | -1.08462 |
| Zfr      | Zfr-003      | 0.0433381   | 0.419929   | -2.38135 |
| Zfr      | Zfr-002      | 0.046624    | 1.70525    | 1.70525  |
| Zfyve1   | Zfyve1-201   | 0.0411557   | 1.1109     | 1.1109   |
| Zfyve16  | Zfyve16-001  | 0.0114935   | 1.28163    | 1.28163  |
| Zfyve28  | Zfyve28-003  | 0.0360637   | 0.219064   | -4.56487 |
| Zfyve28  | Zfyve28-002  | 0.0404861   | 3.6542     | 3.6542   |
| Zfyve9   | Zfyve9-003   | 0.0297318   | 1.21799    | 1.21799  |
| Zgpat    | Zgpat-003    | 0.0240406   | 1.36388    | 1.36388  |
| Zgpat    | Zgpat-005    | 0.0399144   | 210.213    | 210.213  |
| Zhx3     | Zhx3-005     | 0.0358514   | 133.687    | 133.687  |
| Zic1     | Zic1-002     | 0.0390546   | 2.57411    | 2.57411  |
| Zic4     | Zic4-005     | 0.00590281  | 2.91403    | 2.91403  |
| Zmpste24 | Zmpste24-002 | 0.0203359   | 1.69953    | 1.69953  |
| Zmym1    | Zmym1-201    | 0.00285646  | 2.12318    | 2.12318  |
| Zmym3    | Zmym3-008    | 0.00659965  | 6.97167    | 6.97167  |
| Znf512b  | Znf512b-005  | 0.0408533   | 0.404204   | -2.474   |
| Znhit1   | Znhit1-001   | 0.0439176   | 0.446213   | -2.24108 |
| Znhit3   | Znhit3-002   | 0.0446395   | 0.565257   | -1.76911 |
| Znhit3   | Znhit3-005   | 0.00448781  | 2.19273    | 2.19273  |
| Znhit6   | Znhit6-005   | 0.00811622  | 16.8918    | 16.8918  |
| Zpld1    | Zpld1-201    | 0.0357851   | 0.344617   | -2.90177 |
| Zranb2   | Zranb2-006   | 0.0242919   | 9.9983     | 9.9983   |

|         |             |           |        |        |
|---------|-------------|-----------|--------|--------|
| Zscan10 | Zscan10-005 | 0.0445897 | 27.343 | 27.343 |
| Zscan29 | Zscan29-002 | 0.0138672 | 2.0852 | 2.0852 |

### RNA-Seq expression analysis of Neuro2a cells

| Gene Symbol   | Transcript        | p-value     | Ratio (132 vs. SCR) | Fold Change |
|---------------|-------------------|-------------|---------------------|-------------|
| 0610009B22Rik | 0610009B22Rik-001 | 0.0402167   | 1.28349             | 1.28349     |
| 0610009L18Rik | 0610009L18Rik-001 | 0.0035234   | 1.94342             | 1.94342     |
| 0610009O20Rik | 0610009O20Rik-201 | 0.000454318 | 1.22975             | 1.22975     |
| 0610010F05Rik | 0610010F05Rik-001 | 0.00175875  | 3.3169              | 3.3169      |
| 0610010K14Rik | 0610010K14Rik-006 | 0.0107714   | 2.18738             | 2.18738     |
| 0610011F06Rik | 0610011F06Rik-001 | 0.00418816  | 0.453423            | -2.20545    |
| 0610038B21Rik | 0610038B21Rik-002 | 0.041643    | 2.41719             | 2.41719     |
| 1110001J03Rik | 1110001J03Rik-001 | 0.0201975   | 1.28706             | 1.28706     |
| 1110004F10Rik | 1110004F10Rik-006 | 0.0382005   | 0.421668            | -2.37153    |
| 1110004F10Rik | 1110004F10Rik-001 | 0.0237741   | 1.36855             | 1.36855     |
| 1110012L19Rik | 1110012L19Rik-001 | 1.21282e-05 | 1.43291             | 1.43291     |
| 1110020A21Rik | 1110020A21Rik-201 | 0.0133021   | 2.35792             | 2.35792     |
| 1200014J11Rik | 1200014J11Rik-001 | 0.000366047 | 1.29834             | 1.29834     |
| 1500009C09Rik | 1500009C09Rik-001 | 0.00975786  | 2.36472             | 2.36472     |
| 1500009L16Rik | 1500009L16Rik-201 | 0.0448158   | 0.636483            | -1.57113    |
| 1500011K16Rik | 1500011K16Rik-001 | 0.00622297  | 1.26065             | 1.26065     |
| 1500015A07Rik | 1500015A07Rik-002 | 0.0247761   | 1.7912              | 1.7912      |
| 1500017E21Rik | 1500017E21Rik-004 | 0.0271182   | 862.91              | 862.91      |
| 1500017E21Rik | 1500017E21Rik-003 | 0.0245372   | 909.964             | 909.964     |
| 1500026H17Rik | 1500026H17Rik-201 | 0.000877092 | 8.08585             | 8.08585     |
| 1600002D24Rik | 1600002D24Rik-002 | 0.0108698   | 10.3323             | 10.3323     |
| 1600014C23Rik | 1600014C23Rik-201 | 0.0191334   | 1.85951             | 1.85951     |
| 1600023N17Rik | 1600023N17Rik-001 | 0.0403409   | 2.78159             | 2.78159     |
| 1600029O15Rik | 1600029O15Rik-002 | 0.00123947  | 1.83662             | 1.83662     |
| 1700001L19Rik | 1700001L19Rik-201 | 0.0408555   | 2.67483             | 2.67483     |
| 1700001P01Rik | 1700001P01Rik-001 | 0.0110431   | 1.67774             | 1.67774     |
| 1700003F12Rik | 1700003F12Rik-003 | 0.0325633   | 0.330731            | -3.02361    |
| 1700013F07Rik | 1700013F07Rik-001 | 0.0262438   | 11.2581             | 11.2581     |
| 1700019G17Rik | 1700019G17Rik-001 | 0.00218278  | 1.98297             | 1.98297     |
| 1700020D05Rik | 1700020D05Rik-001 | 0.0468749   | 1.5721              | 1.5721      |
| 1700020I14Rik | 1700020I14Rik-002 | 0.00158063  | 2.25627             | 2.25627     |
| 1700020L24Rik | 1700020L24Rik-002 | 0.0431092   | 3.97096             | 3.97096     |
| 1700021F05Rik | 1700021F05Rik-201 | 8.26714e-06 | 1.40385             | 1.40385     |
| 1700025G04Rik | 1700025G04Rik-004 | 0.0444531   | 0.46122             | -2.16816    |
| 1700025G04Rik | 1700025G04Rik-001 | 0.000517349 | 0.720067            | -1.38876    |
| 1700025N23Rik | 1700025N23Rik-001 | 0.00037333  | 1.39203             | 1.39203     |

|               |                   |             |             |              |
|---------------|-------------------|-------------|-------------|--------------|
| 1700028I16Rik | 1700028I16Rik-001 | 0.0187012   | 1.63347     | 1.63347      |
| 1700028I16Rik | 1700028I16Rik-201 | 0.0187013   | 1.63347     | 1.63347      |
| 1700029I15Rik | 1700029I15Rik-002 | 0.00144678  | 0.432375    | -2.31281     |
| 1700029J07Rik | 1700029J07Rik-002 | 0.0050067   | 1.54047     | 1.54047      |
| 1700030J22Rik | 1700030J22Rik-201 | 0.0222297   | 1.37315     | 1.37315      |
| 1700034P13Rik | 1700034P13Rik-001 | 0.0200423   | 2.32441     | 2.32441      |
| 1700037C18Rik | 1700037C18Rik-001 | 0.0327911   | 2.25583     | 2.25583      |
| 1700040D17Rik | 1700040D17Rik-001 | 0.0187954   | 2.61474     | 2.61474      |
| 1700066M21Rik | 1700066M21Rik-001 | 0.0390421   | 1.17483     | 1.17483      |
| 1700069B07Rik | 1700069B07Rik-201 | 0.0441292   | 0.654692    | -1.52744     |
| 1700086P04Rik | 1700086P04Rik-001 | 1.47083e-06 | 2.26894     | 2.26894      |
| 1700101I11Rik | 1700101I11Rik-002 | 0.0158652   | 5.80803e-09 | -1.72175e+08 |
| 1700110I01Rik | 1700110I01Rik-001 | 0.0296951   | 2.02744     | 2.02744      |
| 1700124L16Rik | 1700124L16Rik-002 | 0.0407923   | 1.78463     | 1.78463      |
| 1810010H24Rik | 1810010H24Rik-201 | 0.0497741   | 6.67113     | 6.67113      |
| 1810013L24Rik | 1810013L24Rik-201 | 0.00604544  | 1.10594     | 1.10594      |
| 1810019D21Rik | 1810019D21Rik-003 | 0.0056361   | 3.6956      | 3.6956       |
| 1810044D09Rik | 1810044D09Rik-001 | 0.00813153  | 2.09134     | 2.09134      |
| 1810058I24Rik | 1810058I24Rik-001 | 0.0119052   | 0.753848    | -1.32653     |
| 1810062O18Rik | 1810062O18Rik-003 | 0.0492808   | 2.3419      | 2.3419       |
| 2010310C07Rik | 2010310C07Rik-002 | 0.0313251   | 3.08851     | 3.08851      |
| 2210013O21Rik | 2210013O21Rik-001 | 0.00857364  | 1.34224     | 1.34224      |
| 2210016L21Rik | 2210016L21Rik-001 | 0.00612788  | 1.28454     | 1.28454      |
| 2210018M11Rik | 2210018M11Rik-001 | 0.000658659 | 0.565714    | -1.76768     |
| 2210018M11Rik | 2210018M11Rik-004 | 0.028261    | 4.71905     | 4.71905      |
| 2210404O09Rik | 2210404O09Rik-201 | 0.0108191   | 1.60766     | 1.60766      |
| 2300009A05Rik | 2300009A05Rik-002 | 0.0167909   | 1.50216     | 1.50216      |
| 2300009A05Rik | 2300009A05Rik-001 | 0.00168791  | 1.56728     | 1.56728      |
| 2310009A05Rik | 2310009A05Rik-001 | 0.0325473   | 1.53375     | 1.53375      |
| 2310009A05Rik | 2310009A05Rik-002 | 0.0343251   | 2.4348      | 2.4348       |
| 2310030G06Rik | 2310030G06Rik-201 | 0.00105338  | 0.584798    | -1.70999     |
| 2310034O05Rik | 2310034O05Rik-002 | 0.0385712   | 0.0440156   | -22.7192     |
| 2310035C23Rik | 2310035C23Rik-007 | 0.00066627  | 0.576123    | -1.73574     |
| 2310035C23Rik | 2310035C23Rik-004 | 0.0229373   | 1.37802     | 1.37802      |
| 2310039H08Rik | 2310039H08Rik-201 | 0.0088791   | 1.95165     | 1.95165      |
| 2310039L15Rik | 2310039L15Rik-001 | 0.011523    | 1.25698     | 1.25698      |
| 2310040G07Rik | 2310040G07Rik-001 | 0.0111085   | 0.189078    | -5.28881     |
| 2310058D17Rik | 2310058D17Rik-001 | 0.00653976  | 1.73526     | 1.73526      |
| 2410002F23Rik | 2410002F23Rik-011 | 0.0453983   | 7.80564     | 7.80564      |
| 2410002F23Rik | 2410002F23Rik-014 | 0.00801486  | 37.284      | 37.284       |
| 2510002D24Rik | 2510002D24Rik-004 | 0.0437521   | 2.01573     | 2.01573      |
| 2510046G10Rik | 2510046G10Rik-001 | 0.0165732   | 2.66678     | 2.66678      |
| 2610001J05Rik | 2610001J05Rik-003 | 0.0242322   | 0.478423    | -2.0902      |

|               |                   |             |          |          |
|---------------|-------------------|-------------|----------|----------|
| 2610002M06Rik | 2610002M06Rik-001 | 0.0123483   | 0.712684 | -1.40315 |
| 2610005L07Rik | 2610005L07Rik-002 | 0.000109565 | 1.49144  | 1.49144  |
| 2610005L07Rik | 2610005L07Rik-001 | 2.26404e-05 | 1.51774  | 1.51774  |
| 2610008E11Rik | 2610008E11Rik-001 | 0.00111985  | 1.76269  | 1.76269  |
| 2610015P09Rik | 2610015P09Rik-201 | 5.77951e-05 | 2.01775  | 2.01775  |
| 2610020C07Rik | 2610020C07Rik-201 | 0.00721867  | 1.43591  | 1.43591  |
| 2610020H08Rik | 2610020H08Rik-001 | 0.018675    | 4.13479  | 4.13479  |
| 2610020H08Rik | 2610020H08Rik-008 | 0.0297717   | 4.99388  | 4.99388  |
| 2610021A01Rik | 2610021A01Rik-001 | 0.0101316   | 1.26199  | 1.26199  |
| 2610035F20Rik | 2610035F20Rik-002 | 0.0154055   | 2.00303  | 2.00303  |
| 2610037D02Rik | 2610037D02Rik-001 | 0.00117144  | 1.66421  | 1.66421  |
| 2610203C22Rik | 2610203C22Rik-001 | 0.040414    | 0.37704  | -2.65224 |
| 2700029L08Rik | 2700029L08Rik-001 | 0.0052179   | 0.381598 | -2.62056 |
| 2700029M09Rik | 2700029M09Rik-001 | 0.00431223  | 1.2038   | 1.2038   |
| 2700029M09Rik | 2700029M09Rik-005 | 0.0225468   | 2.59686  | 2.59686  |
| 2700033N17Rik | 2700033N17Rik-001 | 0.00711297  | 1.62744  | 1.62744  |
| 2700046G09Rik | 2700046G09Rik-201 | 0.00282544  | 2.56627  | 2.56627  |
| 2700060E02Rik | 2700060E02Rik-201 | 0.0495092   | 1.14191  | 1.14191  |
| 2700062C07Rik | 2700062C07Rik-201 | 0.0110346   | 1.4195   | 1.4195   |
| 2700097O09Rik | 2700097O09Rik-001 | 0.00998168  | 1.54855  | 1.54855  |
| 2700099C18Rik | 2700099C18Rik-004 | 0.0300959   | 0.52714  | -1.89703 |
| 2700099C18Rik | 2700099C18Rik-002 | 0.0281002   | 1.28697  | 1.28697  |
| 2810001G20Rik | 2810001G20Rik-001 | 0.000386818 | 1.62745  | 1.62745  |
| 2810002D19Rik | 2810002D19Rik-001 | 0.0498194   | 1.36189  | 1.36189  |
| 2810006K23Rik | 2810006K23Rik-001 | 0.0131342   | 1.12568  | 1.12568  |
| 2810013P06Rik | 2810013P06Rik-001 | 0.0299175   | 1.7898   | 1.7898   |
| 2810025M15Rik | 2810025M15Rik-002 | 0.00636159  | 1.23442  | 1.23442  |
| 2810403D21Rik | 2810403D21Rik-003 | 0.0142092   | 2.49743  | 2.49743  |
| 2810405F17Rik | 2810405F17Rik-001 | 0.00772547  | 1.83243  | 1.83243  |
| 2810408I11Rik | 2810408I11Rik-001 | 0.00406341  | 1.59352  | 1.59352  |
| 2810414N06Rik | 2810414N06Rik-001 | 0.00253989  | 2.05461  | 2.05461  |
| 2810429I04Rik | 2810429I04Rik-002 | 0.0343468   | 2.54836  | 2.54836  |
| 2900026A02Rik | 2900026A02Rik-001 | 0.00781706  | 0.617495 | -1.61945 |
| 2900052L18Rik | 2900052L18Rik-001 | 0.0216337   | 1.76994  | 1.76994  |
| 2900076A07Rik | 2900076A07Rik-007 | 0.0436235   | 1.51438  | 1.51438  |
| 2900076A07Rik | 2900076A07Rik-003 | 0.0194252   | 2.74069  | 2.74069  |
| 2900076A07Rik | 2900076A07Rik-005 | 0.0179153   | 5.79751  | 5.79751  |
| 2900093K20Rik | 2900093K20Rik-001 | 0.0338635   | 1.92613  | 1.92613  |
| 3010026O09Rik | 3010026O09Rik-001 | 0.00415747  | 1.46396  | 1.46396  |
| 3110002H16Rik | 3110002H16Rik-001 | 0.0027638   | 0.530949 | -1.88342 |
| 3110002H16Rik | 3110002H16Rik-003 | 0.0108697   | 2.38119  | 2.38119  |
| 3110021N24Rik | 3110021N24Rik-201 | 0.0250082   | 3.23486  | 3.23486  |
| 3110040N11Rik | 3110040N11Rik-003 | 0.0482147   | 1.41313  | 1.41313  |

|               |                   |             |             |             |
|---------------|-------------------|-------------|-------------|-------------|
| 3110045C21Rik | 3110045C21Rik-001 | 0.0354704   | 22.0067     | 22.0067     |
| 3110052M02Rik | 3110052M02Rik-201 | 0.039495    | 0.778627    | -1.28431    |
| 3110056K07Rik | 3110056K07Rik-002 | 0.0220655   | 1.60404     | 1.60404     |
| 3110067C02Rik | 3110067C02Rik-001 | 0.0215675   | 1.73714     | 1.73714     |
| 3110083C13Rik | 3110083C13Rik-201 | 0.0123472   | 2.12244     | 2.12244     |
| 3300002I08Rik | 3300002I08Rik-002 | 0.00329019  | 0.433308    | -2.30783    |
| 3300002I08Rik | 3300002I08Rik-003 | 0.0128083   | 4.37605     | 4.37605     |
| 3930402G23Rik | 3930402G23Rik-001 | 0.0469503   | 0.564508    | -1.77145    |
| 4632404H12Rik | 4632404H12Rik-002 | 0.0246564   | 1.63074     | 1.63074     |
| 4632427E13Rik | 4632427E13Rik-201 | 0.0233722   | 2.97358     | 2.97358     |
| 4632432E15Rik | 4632432E15Rik-001 | 0.00882718  | 1.39098     | 1.39098     |
| 4833427F10Rik | 4833427F10Rik-001 | 0.0451242   | 2.32747     | 2.32747     |
| 4833439L19Rik | 4833439L19Rik-006 | 0.0218791   | 2.16512     | 2.16512     |
| 4921514A10Rik | 4921514A10Rik-001 | 0.0150695   | 0.562968    | -1.7763     |
| 4921531C22Rik | 4921531C22Rik-002 | 0.0253192   | 4.35322     | 4.35322     |
| 4921536K21Rik | 4921536K21Rik-001 | 0.0231373   | 0.550279    | -1.81726    |
| 4930402H24Rik | 4930402H24Rik-001 | 0.00040407  | 0.656596    | -1.52301    |
| 4930402H24Rik | 4930402H24Rik-005 | 0.000133542 | 2.22897     | 2.22897     |
| 4930402H24Rik | 4930402H24Rik-009 | 0.00226493  | 2.53096     | 2.53096     |
| 4930405A21Rik | 4930405A21Rik-001 | 0.0292142   | 1.96832     | 1.96832     |
| 4930430F08Rik | 4930430F08Rik-201 | 0.00450592  | 1.2765      | 1.2765      |
| 4930431F12Rik | 4930431F12Rik-201 | 0.00774633  | 1.56479     | 1.56479     |
| 4930438A08Rik | 4930438A08Rik-001 | 0.0146837   | 9.34786     | 9.34786     |
| 4930444G20Rik | 4930444G20Rik-001 | 0.0317988   | 7.16087     | 7.16087     |
| 4930447F24Rik | 4930447F24Rik-002 | 0.0243637   | 1.90677e+08 | 1.90677e+08 |
| 4930452B06Rik | 4930452B06Rik-001 | 0.0366476   | 1.27869     | 1.27869     |
| 4930486L24Rik | 4930486L24Rik-201 | 0.001338    | 0.443171    | -2.25647    |
| 4930512B01Rik | 4930512B01Rik-201 | 0.0236349   | 6.82744     | 6.82744     |
| 4930516B21Rik | 4930516B21Rik-201 | 0.00145379  | 0.500328    | -1.99869    |
| 4930518I15Rik | 4930518I15Rik-201 | 0.0082454   | 1.91497     | 1.91497     |
| 4930520O04Rik | 4930520O04Rik-002 | 0.0246635   | 1.94844     | 1.94844     |
| 4930522L14Rik | 4930522L14Rik-001 | 0.00132471  | 2.50659     | 2.50659     |
| 4930533O14Rik | 4930533O14Rik-201 | 0.00886573  | 0.692379    | -1.4443     |
| 4930539E08Rik | 4930539E08Rik-001 | 0.00104045  | 1.63518     | 1.63518     |
| 4930550C14Rik | 4930550C14Rik-201 | 0.00185662  | 1.72722     | 1.72722     |
| 4930556J24Rik | 4930556J24Rik-001 | 0.0181615   | 3.55065     | 3.55065     |
| 4930562C15Rik | 4930562C15Rik-008 | 0.00233888  | 2.91263     | 2.91263     |
| 4930563E22Rik | 4930563E22Rik-201 | 0.0105741   | 1.90064     | 1.90064     |
| 4930568G15Rik | 4930568G15Rik-001 | 0.00148561  | 0.226902    | -4.40719    |
| 4930579G24Rik | 4930579G24Rik-001 | 0.00300037  | 0.719964    | -1.38896    |
| 4931403G20Rik | 4931403G20Rik-201 | 0.037133    | 6.2379      | 6.2379      |
| 4931406C07Rik | 4931406C07Rik-202 | 0.0117029   | 0.689581    | -1.45016    |
| 4931414P19Rik | 4931414P19Rik-201 | 0.0295238   | 0.581207    | -1.72056    |

|               |                   |             |             |             |
|---------------|-------------------|-------------|-------------|-------------|
| 4931428F04Rik | 4931428F04Rik-202 | 0.0479258   | 0.737869    | -1.35525    |
| 4932422M17Rik | 4932422M17Rik-001 | 0.0415374   | 1.33923     | 1.33923     |
| 4932443L11Rik | 4932443L11Rik-201 | 0.023858    | 4.69191     | 4.69191     |
| 4933415A04Rik | 4933415A04Rik-201 | 0.0392227   | 0.532416    | -1.87823    |
| 4933421O10Rik | 4933421O10Rik-001 | 0.000644468 | 1.32292     | 1.32292     |
| 4933431E20Rik | 4933431E20Rik-001 | 2.96939e-05 | 1.88839     | 1.88839     |
| 4933431K14Rik | 4933431K14Rik-001 | 0.0211615   | 1.69694     | 1.69694     |
| 4933434E20Rik | 4933434E20Rik-006 | 0.0319838   | 2.5906      | 2.5906      |
| 4933434E20Rik | 4933434E20Rik-002 | 0.0248308   | 2.78633     | 2.78633     |
| 5031425E22Rik | 5031425E22Rik-004 | 0.0189557   | 1.24804     | 1.24804     |
| 5031439G07Rik | 5031439G07Rik-001 | 0.0200609   | 0.522892    | -1.91244    |
| 5033428I22Rik | 5033428I22Rik-201 | 0.0159265   | 1.39537     | 1.39537     |
| 5330438D12Rik | 5330438D12Rik-201 | 0.0309224   | 1.55577     | 1.55577     |
| 5430403G16Rik | 5430403G16Rik-001 | 0.0328073   | 1.62432     | 1.62432     |
| 5530601H04Rik | 5530601H04Rik-003 | 0.0267562   | 4.98515     | 4.98515     |
| 5530601H04Rik | 5530601H04Rik-008 | 0.0447636   | 4831.86     | 4831.86     |
| 5730455P16Rik | 5730455P16Rik-201 | 0.0471587   | 1.49623     | 1.49623     |
| 5730455P16Rik | 5730455P16Rik-003 | 0.0404905   | 4.10431     | 4.10431     |
| 5730508B09Rik | 5730508B09Rik-001 | 0.0274344   | 0.229847    | -4.35072    |
| 5830444B04Rik | 5830444B04Rik-001 | 0.0345863   | 0.518498    | -1.92865    |
| 5830487J09Rik | 5830487J09Rik-002 | 0.0166597   | 0.711153    | -1.40617    |
| 5930430L01Rik | 5930430L01Rik-001 | 0.0358141   | 1.87142     | 1.87142     |
| 6030419C18Rik | 6030419C18Rik-201 | 0.037954    | 0.565644    | -1.7679     |
| 6030443J06Rik | 6030443J06Rik-004 | 0.0303663   | 1.59165     | 1.59165     |
| 6330403K07Rik | 6330403K07Rik-001 | 0.0141246   | 0.754767    | -1.32491    |
| 6820431F20Rik | 6820431F20Rik-001 | 0.00503286  | 1.0972      | 1.0972      |
| 8030453O22Rik | 8030453O22Rik-002 | 0.0053371   | 1.74878     | 1.74878     |
| 8030462N17Rik | 8030462N17Rik-201 | 0.013935    | 1.14215     | 1.14215     |
| 8430429K09Rik | 8430429K09Rik-004 | 0.000243055 | 2.07629     | 2.07629     |
| 8430429K09Rik | 8430429K09Rik-003 | 0.049594    | 2.43838     | 2.43838     |
| 9130011E15Rik | 9130011E15Rik-201 | 0.000248718 | 1.46986     | 1.46986     |
| 9130604C24Rik | 9130604C24Rik-001 | 0.0319678   | 2.00471     | 2.00471     |
| 9230110C19Rik | 9230110C19Rik-201 | 0.000503559 | 1.69633     | 1.69633     |
| 9230111E07Rik | 9230111E07Rik-001 | 0.00385757  | 1.86799     | 1.86799     |
| 9330020H09Rik | 9330020H09Rik-001 | 0.0346489   | 1.85046     | 1.85046     |
| 9330151L19Rik | 9330151L19Rik-201 | 2.67268e-05 | 1.4589      | 1.4589      |
| 9330159M07Rik | 9330159M07Rik-003 | 0.00381459  | 1.78775e+06 | 1.78775e+06 |
| 9330182L06Rik | 9330182L06Rik-002 | 0.0306033   | 0.671072    | -1.49015    |
| 9430037G07Rik | 9430037G07Rik-001 | 0.00432407  | 5.4452      | 5.4452      |
| 9430037O13Rik | 9430037O13Rik-001 | 0.0452867   | 0.387505    | -2.58061    |
| 9430038I01Rik | 9430038I01Rik-004 | 0.0203526   | 0.259851    | -3.84836    |
| 9530056K15Rik | 9530056K15Rik-001 | 0.00484524  | 2.27549     | 2.27549     |
| 9530056K15Rik | 9530056K15Rik-201 | 0.00111346  | 3.33929     | 3.33929     |



|               |                   |             |          |          |
|---------------|-------------------|-------------|----------|----------|
| 9530068E07Rik | 9530068E07Rik-002 | 0.00600406  | 1.54192  | 1.54192  |
| 9530077C05Rik | 9530077C05Rik-201 | 0.00105374  | 1.43436  | 1.43436  |
| 9530085P06Rik | 9530085P06Rik-001 | 0.0388881   | 3.44821  | 3.44821  |
| 9930021J03Rik | 9930021J03Rik-002 | 0.0277663   | 1.43858  | 1.43858  |
| 9930104L06Rik | 9930104L06Rik-002 | 0.00209258  | 1.71151  | 1.71151  |
| 9930104L06Rik | 9930104L06Rik-001 | 0.00497264  | 1.93107  | 1.93107  |
| A130010J15Rik | A130010J15Rik-002 | 0.0162956   | 2.71376  | 2.71376  |
| A130014A01Rik | A130014A01Rik-001 | 1.35955e-06 | 1.79908  | 1.79908  |
| A230006K03Rik | A230006K03Rik-001 | 0.0185991   | 3.12472  | 3.12472  |
| A230072C01Rik | A230072C01Rik-002 | 0.00703173  | 6.81684  | 6.81684  |
| A230103J11Rik | A230103J11Rik-002 | 0.0191988   | 0.394102 | -2.53742 |
| A330017A19Rik | A330017A19Rik-201 | 0.028558    | 1.29789  | 1.29789  |
| A330032B11Rik | A330032B11Rik-201 | 0.0304039   | 1.27633  | 1.27633  |
| A430005L14Rik | A430005L14Rik-001 | 0.00103272  | 1.72404  | 1.72404  |
| A430033K04Rik | A430033K04Rik-002 | 0.0379316   | 1.17407  | 1.17407  |
| A430035B10Rik | A430035B10Rik-001 | 0.00536981  | 1728.61  | 1728.61  |
| A430046D13Rik | A430046D13Rik-201 | 0.0100118   | 1.45178  | 1.45178  |
| A430105J06Rik | A430105J06Rik-001 | 0.00565904  | 1.65146  | 1.65146  |
| A530017D24Rik | A530017D24Rik-001 | 0.0038434   | 0.563568 | -1.77441 |
| A530095I07Rik | A530095I07Rik-001 | 0.0346487   | 3.02646  | 3.02646  |
| A730011C13Rik | A730011C13Rik-001 | 0.024924    | 5.25805  | 5.25805  |
| A730018C14Rik | A730018C14Rik-201 | 0.0302597   | 1.86919  | 1.86919  |
| A830010M20Rik | A830010M20Rik-001 | 0.00159825  | 1.38897  | 1.38897  |
| A830039N20Rik | A830039N20Rik-001 | 0.0178129   | 0.566111 | -1.76644 |
| A830080D01Rik | A830080D01Rik-001 | 0.0229897   | 0.896837 | -1.11503 |
| A830080D01Rik | A830080D01Rik-002 | 0.00715499  | 2.18254  | 2.18254  |
| A930005H10Rik | A930005H10Rik-003 | 0.0197562   | 2.07253  | 2.07253  |
| A930005H10Rik | A930005H10Rik-002 | 0.0196861   | 2.53007  | 2.53007  |
| A930005H10Rik | A930005H10Rik-005 | 2.69273e-05 | 4.93756  | 4.93756  |
| A930007I19Rik | A930007I19Rik-201 | 0.00918341  | 4.03506  | 4.03506  |
| A930018M24Rik | A930018M24Rik-201 | 0.00138663  | 5.93849  | 5.93849  |
| A930019D19Rik | A930019D19Rik-001 | 0.000825859 | 2.76521  | 2.76521  |
| A930032L01Rik | A930032L01Rik-001 | 0.0243768   | 7.588    | 7.588    |
| A930033H14Rik | A930033H14Rik-001 | 0.0308162   | 2.12908  | 2.12908  |
| AA386476      | AA386476-201      | 0.00453055  | 2.32357  | 2.32357  |
| AA792892      | AA792892-001      | 0.0473019   | 1.71488  | 1.71488  |
| AA914427      | AA914427-001      | 0.0417381   | 2.65442  | 2.65442  |
| Aacs          | Aacs-001          | 0.0450171   | 0.743762 | -1.34452 |
| Aaed1         | Aaed1-201         | 0.00185717  | 1.49916  | 1.49916  |
| Aamp          | Aamp-001          | 0.0387286   | 0.838965 | -1.19194 |
| Aars          | Aars-001          | 0.0198183   | 1.35233  | 1.35233  |
| Aars          | Aars-003          | 0.00325246  | 2.08461  | 2.08461  |
| Aars2         | Aars2-201         | 0.00165271  | 0.765323 | -1.30664 |

|          |              |             |            |          |
|----------|--------------|-------------|------------|----------|
| Aasdh    | Aasdh-014    | 0.0484684   | 1.80435    | 1.80435  |
| Aasdhppt | Aasdhppt-201 | 0.0261988   | 1.10928    | 1.10928  |
| Abca1    | Abca1-001    | 0.00011766  | 0.489896   | -2.04125 |
| Abca2    | Abca2-001    | 0.0193574   | 0.827526   | -1.20842 |
| Abca7    | Abca7-001    | 0.0137726   | 0.578269   | -1.7293  |
| Abca7    | Abca7-202    | 0.035218    | 0.646266   | -1.54735 |
| Abcb1a   | Abcb1a-001   | 0.00309968  | 1.78843    | 1.78843  |
| Abcb8    | Abcb8-201    | 0.0217418   | 0.713665   | -1.40122 |
| Abcb9    | Abcb9-001    | 0.000116551 | 0.327352   | -3.05482 |
| Abcb9    | Abcb9-002    | 0.0179533   | 0.429649   | -2.32748 |
| Abcc10   | Abcc10-002   | 0.0191308   | 3.00901    | 3.00901  |
| Abcc3    | Abcc3-201    | 0.0027862   | 0.597064   | -1.67486 |
| Abcc3    | Abcc3-001    | 0.0243189   | 0.618022   | -1.61807 |
| Abcc5    | Abcc5-003    | 0.0131276   | 1.28645    | 1.28645  |
| Abcc5    | Abcc5-006    | 0.00962602  | 1.37493    | 1.37493  |
| Abcc5    | Abcc5-008    | 0.00872924  | 4.3569     | 4.3569   |
| Abcc9    | Abcc9-003    | 0.000259923 | 0.00101506 | -985.163 |
| Abcc9    | Abcc9-202    | 0.000259927 | 0.00101506 | -985.161 |
| Abcc9    | Abcc9-201    | 0.000259935 | 0.00101506 | -985.161 |
| Abcc9    | Abcc9-001    | 0.0287023   | 2.95904    | 2.95904  |
| Abcd1    | Abcd1-001    | 0.0275881   | 0.776098   | -1.2885  |
| Abcf1    | Abcf1-008    | 0.00919407  | 3.97618    | 3.97618  |
| Abhd11   | Abhd11-007   | 0.0105713   | 2.29142    | 2.29142  |
| Abhd12   | Abhd12-003   | 0.00442389  | 2.45818    | 2.45818  |
| Abhd14b  | Abhd14b-001  | 0.0191215   | 1.59068    | 1.59068  |
| Abhd14b  | Abhd14b-005  | 0.00317511  | 2.91262    | 2.91262  |
| Abhd16a  | Abhd16a-001  | 0.046248    | 0.720821   | -1.38731 |
| Abhd5    | Abhd5-002    | 0.0269205   | 1.92562    | 1.92562  |
| Abhd6    | Abhd6-201    | 0.00106714  | 2.16443    | 2.16443  |
| Abi2     | Abi2-001     | 0.0128264   | 0.72324    | -1.38267 |
| Abl1     | Abl1-008     | 0.00110934  | 0.513721   | -1.94658 |
| Ablim1   | Ablim1-008   | 0.014854    | 4.61437    | 4.61437  |
| Ablim2   | Ablim2-015   | 0.0306673   | 0.0416746  | -23.9954 |
| Abr      | Abr-010      | 0.049421    | 0.492321   | -2.03119 |
| Abracl   | Abracl-201   | 0.00557073  | 0.757804   | -1.3196  |
| Acaca    | Acaca-007    | 0.0219647   | 0.393936   | -2.53848 |
| Acad10   | Acad10-001   | 0.0116871   | 3.97388    | 3.97388  |
| Acad11   | Acad11-008   | 0.0198623   | 1.48658    | 1.48658  |
| Acad11   | Acad11-001   | 0.0199461   | 2.03433    | 2.03433  |
| Acad11   | Acad11-002   | 0.0211889   | 2.3777     | 2.3777   |
| Acad8    | Acad8-201    | 0.00433461  | 1.46958    | 1.46958  |
| Acads    | Acads-001    | 0.0232053   | 0.750934   | -1.33168 |
| Acap3    | Acap3-001    | 0.0178095   | 0.634407   | -1.57628 |

|        |            |             |             |          |
|--------|------------|-------------|-------------|----------|
| Acat1  | Acat1-001  | 0.0363478   | 1.08075     | 1.08075  |
| Acat1  | Acat1-003  | 0.00100948  | 1.79119     | 1.79119  |
| Acbd3  | Acbd3-001  | 0.000820465 | 1.16533     | 1.16533  |
| Acbd5  | Acbd5-202  | 0.024768    | 1.31087     | 1.31087  |
| Acbd5  | Acbd5-201  | 0.0226796   | 1.39034     | 1.39034  |
| Acbd6  | Acbd6-001  | 0.0134006   | 0.472379    | -2.11694 |
| Acbd6  | Acbd6-002  | 0.000394423 | 2.52187     | 2.52187  |
| Accs   | Accs-009   | 0.0458449   | 2.90927e-06 | -343729  |
| Accs   | Accs-001   | 0.0495      | 0.637389    | -1.5689  |
| Acd    | Acd-201    | 0.00163682  | 1.36595     | 1.36595  |
| Acin1  | Acin1-024  | 0.00749277  | 1.31445     | 1.31445  |
| Acin1  | Acin1-004  | 0.00764171  | 1.83105     | 1.83105  |
| Acly   | Acly-005   | 0.0308583   | 0.795199    | -1.25755 |
| Acly   | Acly-004   | 0.0497907   | 0.903156    | -1.10723 |
| Aco1   | Aco1-001   | 0.0463459   | 1.29269     | 1.29269  |
| Aco2   | Aco2-006   | 0.0211008   | 0.626358    | -1.59653 |
| Acot13 | Acot13-001 | 7.80701e-05 | 1.62184     | 1.62184  |
| Acot2  | Acot2-001  | 0.000202372 | 2.38078     | 2.38078  |
| Acot7  | Acot7-002  | 0.0271603   | 0.556176    | -1.79799 |
| Acot8  | Acot8-003  | 0.0459651   | 1.4031      | 1.4031   |
| Acox1  | Acox1-003  | 0.0126252   | 0.655286    | -1.52605 |
| Acsf2  | Acsf2-001  | 0.0279337   | 0.387317    | -2.58186 |
| Acsf3  | Acsf3-201  | 0.000575082 | 1.40329     | 1.40329  |
| Acsl4  | Acsl4-004  | 5.1568e-05  | 0.357278    | -2.79894 |
| Acsl4  | Acsl4-001  | 0.0426242   | 0.562911    | -1.77648 |
| Acsl6  | Acsl6-008  | 0.0283011   | 0.0189864   | -52.6692 |
| Acsl6  | Acsl6-015  | 0.0399157   | 51.822      | 51.822   |
| Acsm3  | Acsm3-002  | 0.0492341   | 3.36768     | 3.36768  |
| Actb   | Actb-008   | 0.00704631  | 0.632796    | -1.58029 |
| Actg1  | Actg1-004  | 0.0198804   | 0.585998    | -1.70649 |
| Actg1  | Actg1-006  | 0.0213361   | 0.636363    | -1.57143 |
| Actg1  | Actg1-201  | 0.00169782  | 0.756015    | -1.32273 |
| Actg1  | Actg1-001  | 0.0129412   | 0.767367    | -1.30316 |
| Actl10 | Actl10-001 | 0.0175496   | 0.619279    | -1.61478 |
| Actl6a | Actl6a-007 | 0.0439888   | 17.2255     | 17.2255  |
| Actl6b | Actl6b-007 | 0.0208874   | 0.135479    | -7.38122 |
| Actn1  | Actn1-201  | 0.00138859  | 0.605545    | -1.65141 |
| Actn2  | Actn2-201  | 0.0459845   | 0.237049    | -4.21854 |
| Actn4  | Actn4-007  | 0.000852966 | 0.368782    | -2.71163 |
| Actr10 | Actr10-201 | 0.0233699   | 1.09631     | 1.09631  |
| Actr1a | Actr1a-201 | 0.014318    | 0.855383    | -1.16907 |
| Actr1b | Actr1b-003 | 0.0141682   | 0.0744364   | -13.4343 |
| Actr2  | Actr2-003  | 2.94348e-07 | 0.439326    | -2.27622 |

|           |               |             |             |              |
|-----------|---------------|-------------|-------------|--------------|
| Actr3     | Actr3-001     | 0.00165256  | 0.863756    | -1.15773     |
| Acy1      | Acy1-001      | 0.000718867 | 0.664638    | -1.50458     |
| Acyp1     | Acyp1-003     | 0.0230211   | 1.60486e+06 | 1.60486e+06  |
| Ada       | Ada-001       | 0.0249463   | 1.5666      | 1.5666       |
| Adam11    | Adam11-002    | 0.0455997   | 67.0982     | 67.0982      |
| Adam19    | Adam19-001    | 0.0137939   | 0.696877    | -1.43497     |
| Adam1b    | Adam1b-001    | 0.0353748   | 4.80164     | 4.80164      |
| Adam21    | Adam21-001    | 0.00885302  | 5.85132     | 5.85132      |
| Adam22    | Adam22-003    | 0.0101153   | 0.51262     | -1.95076     |
| Adam22    | Adam22-202    | 0.000120894 | 0.566211    | -1.76613     |
| Adam22    | Adam22-201    | 0.0208014   | 0.578622    | -1.72825     |
| Adam22    | Adam22-013    | 0.0025936   | 7.19863     | 7.19863      |
| Adam23    | Adam23-005    | 0.00128279  | 0.557724    | -1.793       |
| Adam23    | Adam23-004    | 0.0178001   | 2.58929     | 2.58929      |
| Adamts1   | Adamts1-001   | 0.0215109   | 0.548786    | -1.8222      |
| Adamts10  | Adamts10-001  | 0.0430409   | 0.414805    | -2.41077     |
| Adamts13  | Adamts13-002  | 0.0311512   | 0.821135    | -1.21783     |
| Adamts4   | Adamts4-001   | 4.61649e-05 | 0.471137    | -2.12252     |
| Adarb1    | Adarb1-001    | 0.0340924   | 1.52959     | 1.52959      |
| Adarb1    | Adarb1-010    | 0.000565317 | 1.7888      | 1.7888       |
| Adarb1    | Adarb1-003    | 0.0185854   | 2.23398     | 2.23398      |
| Adat2     | Adat2-001     | 0.000943255 | 1.55692     | 1.55692      |
| Adcy6     | Adcy6-201     | 0.000369908 | 0.773671    | -1.29254     |
| Adcy7     | Adcy7-201     | 0.0138168   | 0.366236    | -2.73048     |
| Adcy7     | Adcy7-203     | 0.0272606   | 0.736009    | -1.35868     |
| Adcyap1r1 | Adcyap1r1-007 | 0.0380063   | 9.63149e-10 | -1.03826e+09 |
| Add2      | Add2-005      | 0.0329072   | 0.116103    | -8.61306     |
| Adgra2    | Adgra2-001    | 0.0192492   | 0.720417    | -1.38808     |
| Adgra3    | Adgra3-005    | 0.0404841   | 1.63968     | 1.63968      |
| Adgrb2    | Adgrb2-004    | 0.00112895  | 0.237627    | -4.20827     |
| Adgrd1    | Adgrd1-001    | 0.015654    | 1.39176     | 1.39176      |
| Adgrf5    | Adgrf5-201    | 0.0318804   | 1.47374     | 1.47374      |
| Adgrl1    | Adgrl1-001    | 0.0116712   | 0.751803    | -1.33014     |
| Adgrl1    | Adgrl1-005    | 0.0479623   | 1.82003     | 1.82003      |
| Adgrl1    | Adgrl1-004    | 0.0325663   | 2.21304     | 2.21304      |
| Adgrl2    | Adgrl2-201    | 0.010818    | 0.373229    | -2.67932     |
| Adgrl2    | Adgrl2-019    | 0.0326476   | 1.40907     | 1.40907      |
| Adh5      | Adh5-001      | 0.0457911   | 1.1548      | 1.1548       |
| Adi1      | Adi1-001      | 0.00169489  | 1.462       | 1.462        |
| Adipor2   | Adipor2-001   | 0.000176281 | 0.650495    | -1.53729     |
| Adm2      | Adm2-201      | 0.00593543  | 2.2415      | 2.2415       |
| Adnp      | Adnp-004      | 0.00578475  | 1.66504     | 1.66504      |
| Adora2a   | Adora2a-201   | 0.0285281   | 0.722451    | -1.38418     |

|          |              |             |             |              |
|----------|--------------|-------------|-------------|--------------|
| Adprm    | Adprm-004    | 0.0292542   | 1.35715     | 1.35715      |
| Adrbk1   | Adrbk1-008   | 0.000544905 | 3.1917      | 3.1917       |
| Adrbk1   | Adrbk1-010   | 0.00524922  | 4.74053     | 4.74053      |
| Adrbk2   | Adrbk2-004   | 0.0219935   | 1.33533     | 1.33533      |
| Adrbk2   | Adrbk2-001   | 0.00584668  | 4.93795     | 4.93795      |
| Adrm1    | Adrm1-007    | 0.0325494   | 0.0353203   | -28.3124     |
| Adsl     | Adsl-009     | 0.0204216   | 0.51558     | -1.93956     |
| Aebp2    | Aebp2-001    | 0.0022464   | 0.790601    | -1.26486     |
| Aebp2    | Aebp2-201    | 0.025377    | 1.3686      | 1.3686       |
| AF067063 | AF067063-001 | 0.0246005   | 1.36385e-09 | -7.33219e+08 |
| Aff4     | Aff4-001     | 0.040754    | 0.808204    | -1.23731     |
| Aff4     | Aff4-006     | 0.00360669  | 170.475     | 170.475      |
| Aftph    | Aftph-002    | 0.0227433   | 1.28607     | 1.28607      |
| Aga      | Aga-201      | 0.000881576 | 1.31849     | 1.31849      |
| Agap1    | Agap1-003    | 0.000383254 | 0.560804    | -1.78316     |
| Agap1    | Agap1-002    | 0.000832873 | 1.6434      | 1.6434       |
| Agap2    | Agap2-201    | 0.0136784   | 0.786333    | -1.27173     |
| Agbl3    | Agbl3-006    | 0.0169839   | 2.22838     | 2.22838      |
| Agbl3    | Agbl3-007    | 0.0294455   | 1.1177e+10  | 1.1177e+10   |
| Agbl5    | Agbl5-006    | 0.0294884   | 0.352215    | -2.83917     |
| Agbl5    | Agbl5-002    | 0.0148555   | 2.0389      | 2.0389       |
| Agbl5    | Agbl5-010    | 0.00193947  | 5.44644     | 5.44644      |
| Ager     | Ager-001     | 0.0022869   | 0.0185722   | -53.8439     |
| Agfg1    | Agfg1-002    | 0.000649773 | 1.40534     | 1.40534      |
| Agfg1    | Agfg1-004    | 0.00864317  | 2.08477     | 2.08477      |
| Agfg1    | Agfg1-007    | 0.00239113  | 6.02352     | 6.02352      |
| Agl      | Agl-007      | 0.0330176   | 1.29267     | 1.29267      |
| Agl      | Agl-002      | 0.00303644  | 2.41208     | 2.41208      |
| Agl      | Agl-005      | 0.0144383   | 3.22065     | 3.22065      |
| Agpat5   | Agpat5-001   | 0.00659045  | 0.851357    | -1.17459     |
| Agpat5   | Agpat5-002   | 0.0257519   | 1.26623     | 1.26623      |
| Agpat9   | Agpat9-003   | 0.00581407  | 8.12377     | 8.12377      |
| Agps     | Agps-001     | 0.0262548   | 1.16862     | 1.16862      |
| Agps     | Agps-007     | 0.0111743   | 1.98357     | 1.98357      |
| Agrn     | Agrn-001     | 0.00413395  | 0.377933    | -2.64597     |
| Agrn     | Agrn-004     | 0.00234213  | 0.395209    | -2.53031     |
| Agrn     | Agrn-002     | 0.00693408  | 0.403381    | -2.47905     |
| Agrn     | Agrn-006     | 0.000542425 | 0.465562    | -2.14794     |
| Agtpbp1  | Agtpbp1-018  | 0.0150626   | 4.49349     | 4.49349      |
| Agtrap   | Agtrap-003   | 0.0395001   | 0.0141322   | -70.7603     |
| Ahcyl2   | Ahcyl2-015   | 0.0292781   | 8658.13     | 8658.13      |
| Ahdc1    | Ahdc1-004    | 0.00928333  | 0.731776    | -1.36654     |
| Ahi1     | Ahi1-201     | 0.0247899   | 1.28308     | 1.28308      |

|          |              |             |          |          |
|----------|--------------|-------------|----------|----------|
| Ahnak    | Ahnak-202    | 0.0170655   | 0.420875 | -2.37601 |
| AI118078 | AI118078-001 | 0.00200915  | 2.41179  | 2.41179  |
| AI314180 | AI314180-006 | 0.0496235   | 1.63821  | 1.63821  |
| AI314180 | AI314180-003 | 0.0439784   | 4.21572  | 4.21572  |
| AI314180 | AI314180-007 | 0.00510354  | 8.56727  | 8.56727  |
| AI429214 | AI429214-201 | 0.0196388   | 0.756063 | -1.32264 |
| AI597479 | AI597479-001 | 0.000621466 | 1.51497  | 1.51497  |
| AI606181 | AI606181-001 | 0.000327694 | 0.510904 | -1.95731 |
| AI854517 | AI854517-007 | 0.0437782   | 0.348361 | -2.87059 |
| AI854517 | AI854517-005 | 0.0342722   | 13.9939  | 13.9939  |
| AI854703 | AI854703-001 | 0.0383283   | 1.76684  | 1.76684  |
| Aida     | Aida-001     | 0.000153864 | 0.675598 | -1.48017 |
| Aida     | Aida-004     | 0.0106868   | 0.720103 | -1.38869 |
| Aida     | Aida-003     | 0.0182401   | 0.733499 | -1.36333 |
| Aif1l    | Aif1l-001    | 0.0190209   | 1.84621  | 1.84621  |
| Aig1     | Aig1-001     | 0.0497941   | 1.8416   | 1.8416   |
| Aim1     | Aim1-001     | 0.00716604  | 99.9364  | 99.9364  |
| Aim1l    | Aim1l-009    | 0.0336511   | 2.01003  | 2.01003  |
| Aire     | Aire-013     | 0.0210282   | 0.667339 | -1.49849 |
| Ajuba    | Ajuba-201    | 0.0482719   | 1.43067  | 1.43067  |
| AK010878 | AK010878-001 | 0.00312663  | 1.66851  | 1.66851  |
| Ak1      | Ak1-003      | 0.0372991   | 0.640849 | -1.56043 |
| Ak2      | Ak2-002      | 0.0116206   | 1.49634  | 1.49634  |
| Ak4      | Ak4-001      | 0.0152246   | 0.691374 | -1.44639 |
| Ak4      | Ak4-007      | 0.0425096   | 0.735148 | -1.36027 |
| Ak6      | Ak6-201      | 0.00115949  | 1.56633  | 1.56633  |
| Ak7      | Ak7-201      | 0.0330454   | 0.391347 | -2.55527 |
| Akap1    | Akap1-005    | 0.00133164  | 1.8791   | 1.8791   |
| Akap13   | Akap13-201   | 0.0246486   | 0.801875 | -1.24708 |
| Akap2    | Akap2-003    | 0.0271586   | 13.904   | 13.904   |
| Akap8l   | Akap8l-201   | 0.00776076  | 1.47084  | 1.47084  |
| Akirin1  | Akirin1-003  | 0.0215737   | 2.31908  | 2.31908  |
| Akirin2  | Akirin2-001  | 0.0313454   | 1.13241  | 1.13241  |
| Akna     | Akna-001     | 0.0242069   | 1.73627  | 1.73627  |
| Akr1a1   | Akr1a1-002   | 0.0239085   | 0.740577 | -1.3503  |
| Akr1a1   | Akr1a1-001   | 0.00366071  | 1.23694  | 1.23694  |
| Akt3     | Akt3-201     | 0.00154953  | 0.681898 | -1.4665  |
| Akt3     | Akt3-002     | 0.00053874  | 3.47602  | 3.47602  |
| Aldh16a1 | Aldh16a1-010 | 0.00407047  | 0.600146 | -1.66626 |
| Aldh16a1 | Aldh16a1-002 | 0.0463342   | 0.688373 | -1.4527  |
| Aldh18a1 | Aldh18a1-004 | 0.0492321   | 0.636515 | -1.57105 |
| Aldh18a1 | Aldh18a1-007 | 0.000521299 | 1.48615  | 1.48615  |
| Aldh1l2  | Aldh1l2-001  | 0.00101105  | 1.63168  | 1.63168  |

|         |             |             |           |          |
|---------|-------------|-------------|-----------|----------|
| Aldh1l2 | Aldh1l2-003 | 0.011954    | 3.7528    | 3.7528   |
| Aldh1l2 | Aldh1l2-002 | 9.46337e-05 | 5.29592   | 5.29592  |
| Aldh3a1 | Aldh3a1-001 | 0.000419496 | 0.126095  | -7.93051 |
| Aldh3a2 | Aldh3a2-001 | 0.00875585  | 3.90694   | 3.90694  |
| Aldh5a1 | Aldh5a1-001 | 0.00170118  | 1.44176   | 1.44176  |
| Aldh7a1 | Aldh7a1-001 | 0.00452181  | 1.48164   | 1.48164  |
| Aldh9a1 | Aldh9a1-001 | 0.00967619  | 1.20489   | 1.20489  |
| Alg11   | Alg11-004   | 0.0167875   | 2.78919   | 2.78919  |
| Alg12   | Alg12-001   | 0.00365927  | 0.561367  | -1.78137 |
| Alg12   | Alg12-002   | 0.0137233   | 2.65286   | 2.65286  |
| Alg13   | Alg13-008   | 0.00787507  | 2.24549   | 2.24549  |
| Alg5    | Alg5-002    | 0.0418772   | 0.445515  | -2.24459 |
| Alk     | Alk-201     | 0.00258517  | 0.688753  | -1.4519  |
| Alkbh4  | Alkbh4-004  | 0.0304074   | 3.72304   | 3.72304  |
| Alkbh6  | Alkbh6-002  | 0.00315767  | 1.95616   | 1.95616  |
| Alms1   | Alms1-002   | 0.0489818   | 0.687087  | -1.45542 |
| Alpi    | Alpi-001    | 0.0269332   | 2.85828   | 2.85828  |
| Als2    | Als2-003    | 0.0267499   | 1.28259   | 1.28259  |
| Amacr   | Amacr-201   | 0.00751758  | 1.37979   | 1.37979  |
| Ambra1  | Ambra1-003  | 0.0299008   | 0.52936   | -1.88907 |
| Amdhd2  | Amdhd2-001  | 0.0144299   | 0.39831   | -2.5106  |
| Amer1   | Amer1-001   | 0.00150337  | 1.43805   | 1.43805  |
| Amfr    | Amfr-001    | 0.00927648  | 0.83054   | -1.20404 |
| Amh     | Amh-201     | 0.0394339   | 1.78211   | 1.78211  |
| Amigo2  | Amigo2-201  | 0.0181494   | 0.518873  | -1.92725 |
| Amn1    | Amn1-009    | 0.0311673   | 0.318777  | -3.13699 |
| Amz1    | Amz1-006    | 0.0218497   | 1.6094    | 1.6094   |
| Amz2    | Amz2-005    | 0.0190757   | 0.570531  | -1.75275 |
| Anapc1  | Anapc1-010  | 0.0344933   | 1.25183   | 1.25183  |
| Anapc1  | Anapc1-009  | 0.0145129   | 1.53014   | 1.53014  |
| Anapc1  | Anapc1-005  | 0.00582898  | 2.51966   | 2.51966  |
| Anapc11 | Anapc11-002 | 0.00410908  | 0.543853  | -1.83873 |
| Anapc11 | Anapc11-004 | 0.0281037   | 0.688204  | -1.45306 |
| Anapc16 | Anapc16-002 | 0.00822866  | 1.52744   | 1.52744  |
| Anapc16 | Anapc16-005 | 0.00552444  | 1.72394   | 1.72394  |
| Anapc5  | Anapc5-003  | 0.0332284   | 0.697897  | -1.43288 |
| Anapc5  | Anapc5-005  | 0.00174344  | 0.757722  | -1.31975 |
| Anapc5  | Anapc5-012  | 0.0340353   | 2.60729   | 2.60729  |
| Angpt2  | Angpt2-001  | 0.00411639  | 0.456054  | -2.19272 |
| Angptl1 | Angptl1-002 | 0.0409184   | 0.258271  | -3.8719  |
| Angptl3 | Angptl3-002 | 0.0199269   | 0.173819  | -5.75311 |
| Angptl4 | Angptl4-003 | 0.00735263  | 0.0168392 | -59.3853 |
| Angptl6 | Angptl6-001 | 0.0466998   | 1.98648   | 1.98648  |

|          |              |             |            |          |
|----------|--------------|-------------|------------|----------|
| Ank      | Ank-001      | 0.0489042   | 0.60938    | -1.64101 |
| Ank2     | Ank2-020     | 0.0187799   | 0.0942078  | -10.6148 |
| Ank2     | Ank2-003     | 0.0370075   | 0.347417   | -2.87839 |
| Ank2     | Ank2-015     | 0.0478684   | 1.47796    | 1.47796  |
| Ank2     | Ank2-022     | 0.00556547  | 1.48087    | 1.48087  |
| Ank2     | Ank2-024     | 0.00179638  | 1.68344    | 1.68344  |
| Ank3     | Ank3-001     | 0.0163764   | 0.632971   | -1.57985 |
| Ank3     | Ank3-029     | 0.000351342 | 0.695487   | -1.43784 |
| Ank3     | Ank3-018     | 0.0354368   | 2.85851    | 2.85851  |
| Ankef1   | Ankef1-001   | 0.0204266   | 2.01959    | 2.01959  |
| Ankef1   | Ankef1-006   | 0.00755493  | 8.21489    | 8.21489  |
| Ankfy1   | Ankfy1-005   | 0.0205618   | 0.779472   | -1.28292 |
| Ankhd1   | Ankhd1-018   | 0.0270922   | 0.701936   | -1.42463 |
| Ankib1   | Ankib1-002   | 0.0226988   | 0.245695   | -4.07009 |
| Ankle2   | Ankle2-002   | 0.0452701   | 1.14459    | 1.14459  |
| Ankmy2   | Ankmy2-201   | 0.00257296  | 1.3326     | 1.3326   |
| Ankra2   | Ankra2-003   | 0.0363439   | 0.691291   | -1.44657 |
| Ankra2   | Ankra2-005   | 0.0343868   | 1.45772    | 1.45772  |
| Ankrd10  | Ankrd10-202  | 0.0233002   | 0.88929    | -1.12449 |
| Ankrd11  | Ankrd11-001  | 0.0101369   | 1.11149    | 1.11149  |
| Ankrd11  | Ankrd11-003  | 0.0357191   | 1.44305    | 1.44305  |
| Ankrd11  | Ankrd11-002  | 0.00997695  | 1.45974    | 1.45974  |
| Ankrd11  | Ankrd11-201  | 0.0059592   | 2.04025    | 2.04025  |
| Ankrd12  | Ankrd12-005  | 0.00854072  | 7.18903    | 7.18903  |
| Ankrd13b | Ankrd13b-001 | 0.0367795   | 0.640445   | -1.56141 |
| Ankrd13c | Ankrd13c-009 | 0.044222    | 0.00233195 | -428.826 |
| Ankrd13c | Ankrd13c-201 | 0.00577084  | 2.08578    | 2.08578  |
| Ankrd17  | Ankrd17-002  | 0.0103702   | 0.715645   | -1.39734 |
| Ankrd24  | Ankrd24-013  | 0.0378582   | 0.0751659  | -13.3039 |
| Ankrd27  | Ankrd27-002  | 0.000590576 | 1.64278    | 1.64278  |
| Ankrd27  | Ankrd27-009  | 0.042649    | 3.36149    | 3.36149  |
| Ankrd29  | Ankrd29-001  | 0.0450435   | 3.58871    | 3.58871  |
| Ankrd40  | Ankrd40-005  | 0.0121255   | 0.388348   | -2.57501 |
| Ankrd42  | Ankrd42-005  | 0.0332317   | 0.103396   | -9.67159 |
| Ankrd45  | Ankrd45-001  | 0.0174099   | 0.715597   | -1.39743 |
| Ankrd46  | Ankrd46-201  | 0.000737572 | 1.20827    | 1.20827  |
| Ankrd50  | Ankrd50-001  | 0.0110878   | 0.767633   | -1.30271 |
| Ankrd50  | Ankrd50-003  | 0.0384773   | 1.57733    | 1.57733  |
| Ankrd9   | Ankrd9-005   | 0.0302429   | 91.1251    | 91.1251  |
| Anks3    | Anks3-201    | 0.0202007   | 1.18883    | 1.18883  |
| Ano8     | Ano8-201     | 0.000200735 | 0.674789   | -1.48194 |
| Anp32a   | Anp32a-001   | 0.000152007 | 0.74435    | -1.34345 |
| Anp32b   | Anp32b-001   | 0.029629    | 1.24189    | 1.24189  |



|        |            |             |             |             |
|--------|------------|-------------|-------------|-------------|
| Anp32e | Anp32e-004 | 0.0113105   | 1.83083     | 1.83083     |
| Antxr2 | Antxr2-001 | 0.00475933  | 0.784598    | -1.27454    |
| Anxa2  | Anxa2-005  | 0.0368692   | 0.285887    | -3.49788    |
| Anxa4  | Anxa4-009  | 0.000261062 | 2.8019      | 2.8019      |
| Anxa4  | Anxa4-008  | 0.0437531   | 4.05882     | 4.05882     |
| Anxa6  | Anxa6-001  | 0.000195928 | 0.566559    | -1.76504    |
| Anxa9  | Anxa9-201  | 0.0356686   | 0.0108943   | -91.791     |
| Ap1ar  | Ap1ar-006  | 0.00272411  | 2.07006     | 2.07006     |
| Ap1g1  | Ap1g1-001  | 0.000411417 | 0.855373    | -1.16908    |
| Ap1g1  | Ap1g1-002  | 0.0027485   | 1.96261     | 1.96261     |
| Ap1g2  | Ap1g2-001  | 1.38891e-05 | 0.367944    | -2.71781    |
| Ap1m1  | Ap1m1-002  | 0.0472092   | 1.31294     | 1.31294     |
| Ap1m1  | Ap1m1-004  | 8.16904e-05 | 1.89228     | 1.89228     |
| Ap1s2  | Ap1s2-003  | 0.00135028  | 0.71044     | -1.40758    |
| Ap1s3  | Ap1s3-001  | 0.00923592  | 1.10425     | 1.10425     |
| Ap2a1  | Ap2a1-204  | 0.00249727  | 1.50272     | 1.50272     |
| Ap2a2  | Ap2a2-001  | 0.0427462   | 0.953325    | -1.04896    |
| Ap2b1  | Ap2b1-002  | 0.0495466   | 0.234449    | -4.26532    |
| Ap2b1  | Ap2b1-001  | 0.000172264 | 0.565213    | -1.76924    |
| Ap2b1  | Ap2b1-005  | 0.0289377   | 1.37524     | 1.37524     |
| Ap2b1  | Ap2b1-006  | 0.013038    | 3.84507     | 3.84507     |
| Ap3m1  | Ap3m1-003  | 0.00698894  | 2.65015     | 2.65015     |
| Ap3m1  | Ap3m1-006  | 0.0390737   | 8.34076e+06 | 8.34076e+06 |
| Ap3m2  | Ap3m2-201  | 0.00581953  | 1.16668     | 1.16668     |
| Ap4e1  | Ap4e1-001  | 0.00371977  | 1.24568     | 1.24568     |
| Ap4e1  | Ap4e1-007  | 0.0182688   | 14.0262     | 14.0262     |
| Ap5s1  | Ap5s1-002  | 0.00515192  | 0.123816    | -8.0765     |
| Ap5s1  | Ap5s1-003  | 0.0378271   | 1.428       | 1.428       |
| Apba1  | Apba1-201  | 0.0490751   | 1.41232     | 1.41232     |
| Apbb2  | Apbb2-001  | 0.0112135   | 3.24061     | 3.24061     |
| Apc    | Apc-201    | 0.0053921   | 0.689101    | -1.45117    |
| Apeh   | Apeh-001   | 0.0464405   | 0.521799    | -1.91645    |
| Aph1b  | Aph1b-001  | 9.8684e-05  | 0.454869    | -2.19844    |
| Aph1b  | Aph1b-003  | 0.00444406  | 4.02902     | 4.02902     |
| Aph1c  | Aph1c-001  | 0.017636    | 1.63435     | 1.63435     |
| Apip   | Apip-001   | 0.00479745  | 1.35249     | 1.35249     |
| Apitd1 | Apitd1-003 | 0.011877    | 3.80383     | 3.80383     |
| Aplp1  | Aplp1-201  | 0.0183073   | 0.696667    | -1.43541    |
| Aplp2  | Aplp2-202  | 0.00147912  | 0.675887    | -1.47954    |
| Aplp2  | Aplp2-201  | 0.0136455   | 1.12472     | 1.12472     |
| Apmap  | Apmap-001  | 0.0476986   | 1.18281     | 1.18281     |
| Apobr  | Apobr-001  | 0.00185578  | 1.43841     | 1.43841     |
| Apold1 | Apold1-001 | 0.000231411 | 5.82755     | 5.82755     |

|            |                |             |             |              |
|------------|----------------|-------------|-------------|--------------|
| Apoo       | Apoo-001       | 0.0279133   | 1.49802     | 1.49802      |
| Apopt1     | Apopt1-001     | 0.00523724  | 1.27305     | 1.27305      |
| App        | App-201        | 0.000320891 | 0.83761     | -1.19387     |
| Appl1      | Appl1-003      | 0.0350338   | 5.62191e-07 | -1.77875e+06 |
| Aqp10-ps   | Aqp10-ps-001   | 0.0124064   | 4.20089     | 4.20089      |
| Araf       | Araf-001       | 0.0225816   | 0.497425    | -2.01035     |
| Araf       | Araf-004       | 0.0393311   | 1.54197     | 1.54197      |
| Araf       | Araf-008       | 0.0249559   | 2.09136     | 2.09136      |
| Araf       | Araf-007       | 0.0170339   | 5.60771     | 5.60771      |
| Arap3      | Arap3-201      | 0.0136143   | 0.500712    | -1.99715     |
| Arcn1      | Arcn1-001      | 0.00728133  | 1.25861     | 1.25861      |
| Arcn1      | Arcn1-003      | 0.0185116   | 2.42923     | 2.42923      |
| Arf1       | Arf1-001       | 0.0132561   | 1.10825     | 1.10825      |
| Arfgap1    | Arfgap1-013    | 0.00327036  | 0.194748    | -5.13484     |
| Arfgef2    | Arfgef2-002    | 0.0282441   | 6.81582     | 6.81582      |
| Arfrp1     | Arfrp1-001     | 0.0199737   | 0.606842    | -1.64787     |
| Arhgap1    | Arhgap1-201    | 0.0106951   | 2.89414     | 2.89414      |
| Arhgap19   | Arhgap19-001   | 0.0367939   | 1.28165     | 1.28165      |
| Arhgap21   | Arhgap21-010   | 0.0249616   | 0.615074    | -1.62582     |
| Arhgap22   | Arhgap22-005   | 0.0374947   | 8.13261e-10 | -1.22962e+09 |
| Arhgap22   | Arhgap22-006   | 0.0277159   | 0.190474    | -5.25006     |
| Arhgap26   | Arhgap26-017   | 0.028063    | 1.61089     | 1.61089      |
| Arhgap28   | Arhgap28-001   | 0.00911792  | 0.565151    | -1.76944     |
| Arhgap30   | Arhgap30-002   | 0.0387952   | 0.656461    | -1.52332     |
| Arhgap32   | Arhgap32-002   | 0.00887106  | 0.267795    | -3.7342      |
| Arhgap33os | Arhgap33os-001 | 0.0437378   | 1.57289     | 1.57289      |
| Arhgap44   | Arhgap44-003   | 0.0293493   | 0.126266    | -7.91979     |
| Arhgdib    | Arhgdib-003    | 0.0115781   | 0.0441723   | -22.6386     |
| Arhgdig    | Arhgdig-002    | 0.00269293  | 4.85027     | 4.85027      |
| Arhgef1    | Arhgef1-016    | 0.0259418   | 0.535411    | -1.86773     |
| Arhgef1    | Arhgef1-003    | 0.0419746   | 0.664045    | -1.50592     |
| Arhgef10   | Arhgef10-001   | 0.0281956   | 2.14821     | 2.14821      |
| Arhgef19   | Arhgef19-003   | 0.0252392   | 320.696     | 320.696      |
| Arhgef2    | Arhgef2-003    | 0.010285    | 1.6153      | 1.6153       |
| Arhgef2    | Arhgef2-004    | 0.0467921   | 1.815       | 1.815        |
| Arhgef2    | Arhgef2-002    | 0.00100905  | 2.52253     | 2.52253      |
| Arhgef25   | Arhgef25-202   | 0.00232648  | 0.744218    | -1.34369     |
| Arhgef28   | Arhgef28-201   | 0.00388646  | 1.3448      | 1.3448       |
| Arhgef3    | Arhgef3-201    | 0.0175599   | 1.28348     | 1.28348      |
| Arhgef40   | Arhgef40-004   | 0.0473008   | 0.464593    | -2.15242     |
| Arhgef40   | Arhgef40-014   | 0.0356185   | 0.497198    | -2.01127     |
| Arhgef40   | Arhgef40-003   | 0.00535614  | 0.578868    | -1.72751     |
| Arhgef40   | Arhgef40-020   | 0.020278    | 0.661792    | -1.51105     |

|          |              |             |             |             |
|----------|--------------|-------------|-------------|-------------|
| Arhgef40 | Arhgef40-011 | 0.00655023  | 0.690478    | -1.44827    |
| Arhgef6  | Arhgef6-003  | 0.0150197   | 0.347548    | -2.8773     |
| Arid1b   | Arid1b-001   | 0.0337488   | 0.791477    | -1.26346    |
| Arid2    | Arid2-001    | 0.0481835   | 0.747078    | -1.33855    |
| Arid3a   | Arid3a-003   | 0.0277122   | 0.540351    | -1.85065    |
| Arid3a   | Arid3a-001   | 0.0358165   | 0.62356     | -1.60369    |
| Arid3b   | Arid3b-201   | 0.0349991   | 1.41706     | 1.41706     |
| Arid4a   | Arid4a-003   | 0.0338442   | 1.27773e+06 | 1.27773e+06 |
| Arid4b   | Arid4b-001   | 0.00352574  | 0.836728    | -1.19513    |
| Arih1    | Arih1-001    | 3.6346e-05  | 0.632789    | -1.58031    |
| Arih1    | Arih1-002    | 0.000739691 | 2.04313     | 2.04313     |
| Arih2    | Arih2-009    | 0.0242928   | 4.05203     | 4.05203     |
| Arl1     | Arl1-001     | 0.000134278 | 1.28533     | 1.28533     |
| Arl10    | Arl10-004    | 0.000234215 | 10.3239     | 10.3239     |
| Arl11    | Arl11-201    | 0.0426373   | 3.17342     | 3.17342     |
| Arl14ep  | Arl14ep-004  | 0.00179893  | 1.72062     | 1.72062     |
| Arl14ep  | Arl14ep-002  | 0.000715375 | 2.60723     | 2.60723     |
| Arl15    | Arl15-001    | 0.0124558   | 1.28677     | 1.28677     |
| Arl16    | Arl16-003    | 0.0257765   | 1.69042     | 1.69042     |
| Arl2     | Arl2-003     | 0.0191518   | 3.17304     | 3.17304     |
| Arl4a    | Arl4a-001    | 0.0346429   | 0.807924    | -1.23774    |
| Arl4a    | Arl4a-003    | 0.00283389  | 2.20414     | 2.20414     |
| Arl4a    | Arl4a-004    | 0.0478996   | 3.28103     | 3.28103     |
| Arl4c    | Arl4c-001    | 0.0336614   | 0.292465    | -3.41922    |
| Arl5b    | Arl5b-002    | 0.0237578   | 0.688629    | -1.45216    |
| Arl5b    | Arl5b-001    | 0.00569006  | 0.775759    | -1.28906    |
| Arl6     | Arl6-003     | 0.0301276   | 1.53156     | 1.53156     |
| Arl6ip1  | Arl6ip1-006  | 0.00229575  | 5.59089     | 5.59089     |
| Arl8b    | Arl8b-002    | 0.0147736   | 1.45269     | 1.45269     |
| Arl8b    | Arl8b-001    | 1.98892e-05 | 1.58914     | 1.58914     |
| Arl9     | Arl9-002     | 0.00481873  | 2.76823     | 2.76823     |
| Armc2    | Armc2-004    | 0.015239    | 1.92686     | 1.92686     |
| Armc8    | Armc8-004    | 0.00963411  | 2.82609     | 2.82609     |
| Armcx2   | Armcx2-003   | 0.0268389   | 3.68891     | 3.68891     |
| Armt1    | Armt1-005    | 0.000359997 | 0.244392    | -4.09178    |
| Armt1    | Armt1-002    | 0.0305712   | 0.805663    | -1.24121    |
| Arntl    | Arntl-201    | 0.0111246   | 0.734862    | -1.3608     |
| Arpc1a   | Arpc1a-005   | 0.0283114   | 0.215268    | -4.64537    |
| Arpc1b   | Arpc1b-010   | 0.0484797   | 0.54421     | -1.83753    |
| Arpc1b   | Arpc1b-011   | 0.0309463   | 0.675854    | -1.47961    |
| Arpc2    | Arpc2-003    | 0.0492959   | 0.509701    | -1.96193    |
| Arpc2    | Arpc2-001    | 0.0205643   | 0.819587    | -1.22013    |
| Arpc3    | Arpc3-001    | 0.00334802  | 0.77047     | -1.29791    |

|        |            |             |             |              |
|--------|------------|-------------|-------------|--------------|
| Arpc5  | Arpc5-001  | 6.67893e-06 | 0.674275    | -1.48308     |
| Arpc5  | Arpc5-002  | 5.03734e-05 | 2.03887     | 2.03887      |
| Arpc5l | Arpc5l-001 | 0.00177225  | 0.54757     | -1.82625     |
| Arpc5l | Arpc5l-003 | 0.000537029 | 1.96502     | 1.96502      |
| Arpp19 | Arpp19-201 | 0.00118904  | 0.592909    | -1.6866      |
| Arpp19 | Arpp19-001 | 0.0131794   | 0.61995     | -1.61303     |
| Arpp19 | Arpp19-010 | 0.000386669 | 1.28312     | 1.28312      |
| Arrb2  | Arrb2-008  | 0.0118215   | 2.75553     | 2.75553      |
| Arrb2  | Arrb2-001  | 0.00940284  | 4.04802     | 4.04802      |
| Arrdc3 | Arrdc3-001 | 2.28952e-05 | 0.524156    | -1.90783     |
| Arsb   | Arsb-201   | 0.0440654   | 0.715462    | -1.3977      |
| Arsk   | Arsk-003   | 0.00867597  | 2.79786     | 2.79786      |
| Arvcf  | Arvcf-201  | 0.00519802  | 0.442358    | -2.26061     |
| Arvcf  | Arvcf-001  | 0.00831833  | 0.465321    | -2.14905     |
| Arvcf  | Arvcf-005  | 0.0321284   | 0.760594    | -1.31476     |
| Asap1  | Asap1-004  | 0.00403468  | 0.648017    | -1.54317     |
| Asb1   | Asb1-002   | 0.00996691  | 12.7369     | 12.7369      |
| Asb13  | Asb13-001  | 0.00426878  | 1.62429     | 1.62429      |
| Asb13  | Asb13-004  | 0.00669605  | 1.63133     | 1.63133      |
| Asb16  | Asb16-001  | 0.00114572  | 3.51239     | 3.51239      |
| Asb2   | Asb2-002   | 0.0489618   | 0.184635    | -5.41608     |
| Ascc1  | Ascc1-202  | 0.0143718   | 2.04132     | 2.04132      |
| Ascc2  | Ascc2-002  | 0.0302972   | 0.741094    | -1.34936     |
| Ascc2  | Ascc2-001  | 0.0113589   | 1.39741     | 1.39741      |
| Ascc3  | Ascc3-201  | 0.00261196  | 1.15013     | 1.15013      |
| Ash1l  | Ash1l-002  | 0.0329533   | 0.339928    | -2.9418      |
| Ash1l  | Ash1l-201  | 0.0217413   | 1.31192     | 1.31192      |
| Ash2l  | Ash2l-007  | 0.0348655   | 6.17222e-12 | -1.62016e+11 |
| Ash2l  | Ash2l-201  | 0.025792    | 1.36057     | 1.36057      |
| Asic1  | Asic1-201  | 0.004021    | 1.37439     | 1.37439      |
| Asic3  | Asic3-004  | 0.0484902   | 3.33709e-05 | -29966.2     |
| Asic5  | Asic5-001  | 0.0119655   | 0.379644    | -2.63405     |
| Asl    | Asl-006    | 0.0209481   | 0.654515    | -1.52785     |
| Asns   | Asns-001   | 0.000898074 | 1.45236     | 1.45236      |
| Asns   | Asns-002   | 0.012505    | 1.50281     | 1.50281      |
| Asph   | Asph-002   | 0.0154429   | 1.25532     | 1.25532      |
| Asph   | Asph-007   | 0.00939982  | 3.09994     | 3.09994      |
| Asrgl1 | Asrgl1-001 | 0.000148479 | 1.42878     | 1.42878      |
| Aste1  | Aste1-005  | 0.00507408  | 0.275866    | -3.62495     |
| Aste1  | Aste1-004  | 0.0136072   | 2.47054     | 2.47054      |
| Astn1  | Astn1-001  | 0.00015549  | 0.508373    | -1.96706     |
| Astn1  | Astn1-005  | 0.00772945  | 0.616947    | -1.62088     |
| Asxl2  | Asxl2-006  | 0.00293939  | 1.80124     | 1.80124      |

|          |              |             |           |          |
|----------|--------------|-------------|-----------|----------|
| Ate1     | Ate1-202     | 0.00575313  | 0.869956  | -1.14948 |
| Ate1     | Ate1-203     | 0.00913896  | 2.88942   | 2.88942  |
| Atf1     | Atf1-005     | 0.0308219   | 0.390916  | -2.5581  |
| Atf1     | Atf1-003     | 0.01383     | 1.89891   | 1.89891  |
| Atf2     | Atf2-201     | 0.00290173  | 0.396524  | -2.52191 |
| Atf2     | Atf2-005     | 0.0122825   | 0.627208  | -1.59437 |
| Atf2     | Atf2-006     | 0.0367875   | 1.61838   | 1.61838  |
| Atf2     | Atf2-007     | 0.026707    | 1.65873   | 1.65873  |
| Atf3     | Atf3-001     | 0.00216171  | 3.52233   | 3.52233  |
| Atf3     | Atf3-002     | 0.000558489 | 8.66888   | 8.66888  |
| Atf4     | Atf4-201     | 0.000255355 | 1.52739   | 1.52739  |
| Atf5     | Atf5-202     | 0.0168866   | 0.348289  | -2.87118 |
| Atf6     | Atf6-001     | 0.000295613 | 1.82823   | 1.82823  |
| Atf7     | Atf7-009     | 0.000631269 | 0.0432758 | -23.1076 |
| Atf7     | Atf7-006     | 0.0105603   | 14.04     | 14.04    |
| Atf7ip   | Atf7ip-001   | 0.000627188 | 0.666373  | -1.50066 |
| Atf7ip   | Atf7ip-003   | 0.0497483   | 1.45272   | 1.45272  |
| Atg12    | Atg12-201    | 0.0353356   | 0.670502  | -1.49142 |
| Atg13    | Atg13-002    | 0.0393075   | 1.07759   | 1.07759  |
| Atg14    | Atg14-201    | 0.00219504  | 1.34479   | 1.34479  |
| Atg16l1  | Atg16l1-010  | 0.0373266   | 0.0905676 | -11.0415 |
| Atg16l1  | Atg16l1-011  | 0.0406434   | 1.46811   | 1.46811  |
| Atg2b    | Atg2b-201    | 0.0300457   | 1.15298   | 1.15298  |
| Atg4a-ps | Atg4a-ps-001 | 0.00313231  | 1.24468   | 1.24468  |
| Atg5     | Atg5-201     | 0.00125886  | 1.37231   | 1.37231  |
| Atg7     | Atg7-001     | 0.0231532   | 0.818622  | -1.22156 |
| Atg7     | Atg7-004     | 0.00590577  | 10.1094   | 10.1094  |
| Atg7     | Atg7-002     | 0.0105093   | 11.9262   | 11.9262  |
| Atg7     | Atg7-003     | 0.0100444   | 44.2134   | 44.2134  |
| Atg9a    | Atg9a-201    | 0.0105196   | 1.60291   | 1.60291  |
| Atg9a    | Atg9a-003    | 0.000431692 | 3.49384   | 3.49384  |
| Atg9a    | Atg9a-007    | 0.000372649 | 4.80175   | 4.80175  |
| Atl2     | Atl2-201     | 0.0314958   | 1.11781   | 1.11781  |
| Atl3     | Atl3-201     | 0.0100228   | 0.742001  | -1.34771 |
| Atp10d   | Atp10d-001   | 0.00495973  | 0.631292  | -1.58405 |
| Atp1a1   | Atp1a1-003   | 0.0199876   | 0.658648  | -1.51826 |
| Atp1a1   | Atp1a1-001   | 0.000887423 | 0.709734  | -1.40898 |
| Atp1a3   | Atp1a3-001   | 0.00190109  | 0.753723  | -1.32675 |
| Atp1a3   | Atp1a3-004   | 0.0200964   | 0.830187  | -1.20455 |
| Atp2a2   | Atp2a2-003   | 0.028368    | 0.559794  | -1.78637 |
| Atp2b1   | Atp2b1-201   | 2.33786e-05 | 0.737908  | -1.35518 |
| Atp2b4   | Atp2b4-001   | 0.00846755  | 0.286128  | -3.49494 |
| Atp2b4   | Atp2b4-201   | 0.00740097  | 0.320198  | -3.12307 |

|          |              |             |             |          |
|----------|--------------|-------------|-------------|----------|
| Atp2c1   | Atp2c1-007   | 0.0301772   | 0.000182634 | -5475.42 |
| Atp2c1   | Atp2c1-005   | 0.00747816  | 0.771416    | -1.29632 |
| Atp5b    | Atp5b-005    | 0.0333477   | 0.63961     | -1.56345 |
| Atp5c1   | Atp5c1-003   | 0.00625069  | 2.14844     | 2.14844  |
| Atp5e    | Atp5e-002    | 0.0406315   | 0.739214    | -1.35279 |
| Atp5g3   | Atp5g3-004   | 0.0391012   | 0.632914    | -1.57999 |
| Atp5j    | Atp5j-002    | 0.0151165   | 0.246729    | -4.05303 |
| Atp5o    | Atp5o-007    | 0.0485243   | 1.71985     | 1.71985  |
| Atp5s    | Atp5s-201    | 0.0127201   | 1.60973     | 1.60973  |
| Atp6ap1  | Atp6ap1-006  | 0.033785    | 0.477085    | -2.09606 |
| Atp6ap1l | Atp6ap1l-001 | 0.000274009 | 2.0377      | 2.0377   |
| Atp6v0e2 | Atp6v0e2-001 | 0.0166337   | 1.17845     | 1.17845  |
| Atp6v1a  | Atp6v1a-006  | 0.0409348   | 0.146459    | -6.82783 |
| Atp6v1a  | Atp6v1a-002  | 0.0025167   | 0.638443    | -1.56631 |
| Atp6v1a  | Atp6v1a-001  | 0.000658418 | 0.728092    | -1.37345 |
| Atp6v1b2 | Atp6v1b2-004 | 0.00411333  | 0.195046    | -5.12699 |
| Atp6v1b2 | Atp6v1b2-001 | 0.00174867  | 1.23047     | 1.23047  |
| Atp6v1d  | Atp6v1d-201  | 0.00353015  | 1.1411      | 1.1411   |
| Atp6v1f  | Atp6v1f-003  | 0.0185576   | 0.389336    | -2.56847 |
| Atp7b    | Atp7b-001    | 0.00388511  | 1.47824     | 1.47824  |
| Atp8a1   | Atp8a1-003   | 0.0337274   | 1.31896     | 1.31896  |
| Atp8a1   | Atp8a1-005   | 0.0251443   | 2.18264     | 2.18264  |
| Atp8a1   | Atp8a1-014   | 0.00230821  | 5.89817     | 5.89817  |
| Atp8b2   | Atp8b2-003   | 0.0202276   | 0.59208     | -1.68896 |
| Atp9b    | Atp9b-201    | 0.035938    | 0.72492     | -1.37946 |
| Atpaf2   | Atpaf2-001   | 0.000233494 | 1.47008     | 1.47008  |
| Atpif1   | Atpif1-001   | 0.00427785  | 0.766535    | -1.30457 |
| Atr      | Atr-001      | 0.00711937  | 0.895646    | -1.11651 |
| Atr      | Atr-009      | 0.00338429  | 2.53527     | 2.53527  |
| Atrnl1   | Atrnl1-201   | 0.000912474 | 0.885006    | -1.12994 |
| Atrx     | Atrx-001     | 0.0027492   | 0.864008    | -1.1574  |
| Atrx     | Atrx-021     | 0.03193     | 1.63573     | 1.63573  |
| Atrx     | Atrx-006     | 0.00067821  | 2.60295     | 2.60295  |
| Atrx     | Atrx-011     | 0.0164833   | 3.54683     | 3.54683  |
| Atxn10   | Atxn10-201   | 0.000600279 | 0.791113    | -1.26404 |
| Atxn1l   | Atxn1l-201   | 0.0468369   | 0.788561    | -1.26813 |
| Atxn2    | Atxn2-019    | 0.0441865   | 0.802618    | -1.24592 |
| Atxn2    | Atxn2-002    | 0.0355544   | 1.26813     | 1.26813  |
| Atxn2    | Atxn2-004    | 0.0253555   | 1.48414     | 1.48414  |
| Atxn2l   | Atxn2l-005   | 0.00120827  | 1.35389     | 1.35389  |
| Atxn2l   | Atxn2l-002   | 0.00758409  | 1.45179     | 1.45179  |
| Atxn3    | Atxn3-001    | 0.0306699   | 1.14893     | 1.14893  |
| Atxn7l3b | Atxn7l3b-001 | 0.0441812   | 1.21595     | 1.21595  |

|               |                   |             |             |             |
|---------------|-------------------|-------------|-------------|-------------|
| AU040320      | AU040320-003      | 0.0044508   | 1.23919     | 1.23919     |
| AU041133      | AU041133-201      | 0.00392475  | 8.40526     | 8.40526     |
| Auh           | Auh-002           | 0.00341242  | 1.72177     | 1.72177     |
| Aup1          | Aup1-003          | 0.00435178  | 2.43813     | 2.43813     |
| Aurka         | Aurka-002         | 0.0316258   | 1.61183     | 1.61183     |
| Aurka         | Aurka-201         | 0.0316258   | 1.61183     | 1.61183     |
| Aurkaip1      | Aurkaip1-002      | 0.00138795  | 1.56992     | 1.56992     |
| Auts2         | Auts2-015         | 0.0484127   | 0.118753    | -8.42083    |
| Auts2         | Auts2-001         | 0.0161261   | 0.67032     | -1.49183    |
| Auts2         | Auts2-203         | 0.0377558   | 3.82756     | 3.82756     |
| AV026068      | AV026068-002      | 9.24919e-06 | 5.07314     | 5.07314     |
| Avpi1         | Avpi1-001         | 0.0213806   | 1.67183     | 1.67183     |
| AY512931      | AY512931-001      | 0.0378392   | 1.52193     | 1.52193     |
| Azi2          | Azi2-008          | 0.0238774   | 0.430951    | -2.32045    |
| Azi2          | Azi2-001          | 0.041967    | 0.795728    | -1.25671    |
| Azin1         | Azin1-003         | 0.0245641   | 0.722036    | -1.38497    |
| Azin1         | Azin1-005         | 0.0359811   | 1.47355     | 1.47355     |
| Azin2         | Azin2-004         | 0.0391317   | 1.49058     | 1.49058     |
| B130034C11Rik | B130034C11Rik-001 | 0.0127298   | 3.01171     | 3.01171     |
| B130046B21Rik | B130046B21Rik-201 | 0.0471099   | 1.1985      | 1.1985      |
| B230118H07Rik | B230118H07Rik-003 | 0.000717503 | 1.6806      | 1.6806      |
| B230216N24Rik | B230216N24Rik-005 | 0.0308346   | 1.28275     | 1.28275     |
| B230217C12Rik | B230217C12Rik-004 | 0.000841744 | 2.95281     | 2.95281     |
| B230219D22Rik | B230219D22Rik-201 | 0.00128194  | 1.58337     | 1.58337     |
| B230307C23Rik | B230307C23Rik-001 | 0.0262091   | 1.6516      | 1.6516      |
| B230317F23Rik | B230317F23Rik-001 | 0.0249735   | 2.85054     | 2.85054     |
| B2m           | B2m-001           | 4.54769e-05 | 0.614419    | -1.62755    |
| B330016D10Rik | B330016D10Rik-201 | 0.00077401  | 1.93899     | 1.93899     |
| B3galt1       | B3galt1-002       | 0.00640313  | 0.49781     | -2.0088     |
| B3galt1       | B3galt1-201       | 1.54727e-05 | 0.514832    | -1.94238    |
| B3galt1       | B3galt1-003       | 0.0422586   | 0.515103    | -1.94136    |
| B3gat3        | B3gat3-201        | 0.0177988   | 0.819912    | -1.21964    |
| B3gnt2        | B3gnt2-002        | 0.00654046  | 0.496621    | -2.01361    |
| B430212C06Rik | B430212C06Rik-001 | 0.0131136   | 0.135819    | -7.36272    |
| B430212C06Rik | B430212C06Rik-003 | 0.0131136   | 0.13582     | -7.36271    |
| B4galt1       | B4galt1-001       | 0.0232515   | 0.698218    | -1.43222    |
| B4galt1       | B4galt1-002       | 0.0320926   | 5.12156e+07 | 5.12156e+07 |
| B4galt3       | B4galt3-012       | 0.0278772   | 9.04916     | 9.04916     |
| B4galt5       | B4galt5-001       | 0.0132143   | 0.710586    | -1.40729    |
| B4galt6       | B4galt6-201       | 0.0189909   | 0.77909     | -1.28355    |
| B630019A10Rik | B630019A10Rik-001 | 0.0204917   | 0.303065    | -3.29962    |
| B930036N10Rik | B930036N10Rik-201 | 0.0323035   | 0.000619048 | -1615.38    |
| B930095G15Rik | B930095G15Rik-002 | 0.00916682  | 0.690403    | -1.44843    |

|          |              |             |           |          |
|----------|--------------|-------------|-----------|----------|
| B9d1     | B9d1-001     | 0.00435697  | 0.709028  | -1.41038 |
| Bace2    | Bace2-201    | 0.00911194  | 0.832244  | -1.20157 |
| Bag1     | Bag1-002     | 0.0305431   | 1.29356   | 1.29356  |
| Bag6     | Bag6-001     | 0.0185757   | 1.16161   | 1.16161  |
| Bahcc1   | Bahcc1-003   | 0.000712145 | 1.7457    | 1.7457   |
| Baiap2l2 | Baiap2l2-004 | 0.0185054   | 0.153685  | -6.5068  |
| Bak1     | Bak1-002     | 0.0332202   | 1.63554   | 1.63554  |
| Banp     | Banp-001     | 0.0223235   | 0.533631  | -1.87395 |
| Banp     | Banp-013     | 0.0380524   | 422.787   | 422.787  |
| Bard1    | Bard1-001    | 0.0245721   | 0.780554  | -1.28114 |
| Barhl1   | Barhl1-001   | 0.00308872  | 0.0807185 | -12.3887 |
| Baz2a    | Baz2a-202    | 0.00163853  | 0.699215  | -1.43018 |
| Baz2a    | Baz2a-201    | 0.00881013  | 0.750477  | -1.33249 |
| BB557941 | BB557941-001 | 0.0253106   | 6.60222   | 6.60222  |
| Bbs10    | Bbs10-201    | 0.000175819 | 2.03053   | 2.03053  |
| Bbs12    | Bbs12-001    | 0.0061162   | 1.81012   | 1.81012  |
| Bbs2     | Bbs2-001     | 0.000866286 | 1.62216   | 1.62216  |
| Bbs4     | Bbs4-201     | 0.00193986  | 1.65236   | 1.65236  |
| Bbs9     | Bbs9-003     | 0.0479821   | 2.03687   | 2.03687  |
| Bbx      | Bbx-001      | 0.000498693 | 0.744134  | -1.34384 |
| BC001981 | BC001981-001 | 0.00113363  | 8.4723    | 8.4723   |
| BC003331 | BC003331-003 | 0.0333232   | 1.26206   | 1.26206  |
| BC003331 | BC003331-006 | 0.0485419   | 2.28826   | 2.28826  |
| BC003331 | BC003331-005 | 0.0351368   | 3.942     | 3.942    |
| BC021767 | BC021767-002 | 0.0336384   | 410602    | 410602   |
| BC025920 | BC025920-001 | 0.0472588   | 11.3268   | 11.3268  |
| BC029214 | BC029214-011 | 0.0382866   | 3.35238   | 3.35238  |
| BC029214 | BC029214-008 | 0.0196768   | 9.10882   | 9.10882  |
| BC030343 | BC030343-001 | 0.00129692  | 2.31088   | 2.31088  |
| BC030867 | BC030867-003 | 0.0342741   | 2.29108   | 2.29108  |
| BC037034 | BC037034-001 | 0.0423994   | 0.631409  | -1.58376 |
| BC039771 | BC039771-001 | 0.0258463   | 1.23476   | 1.23476  |
| BC048644 | BC048644-002 | 0.0310233   | 2.98877   | 2.98877  |
| BC052040 | BC052040-001 | 0.00573711  | 1.17389   | 1.17389  |
| BC055324 | BC055324-004 | 0.0013723   | 3.40084   | 3.40084  |
| BC065397 | BC065397-006 | 0.0479009   | 106.336   | 106.336  |
| BC089491 | BC089491-201 | 0.0224466   | 3.75408   | 3.75408  |
| Bcam     | Bcam-001     | 0.0143659   | 0.440805  | -2.26858 |
| Bcap29   | Bcap29-202   | 0.0396597   | 1.13966   | 1.13966  |
| Bcap31   | Bcap31-001   | 0.0283324   | 0.783436  | -1.27643 |
| Bcar1    | Bcar1-201    | 0.0325116   | 0.825204  | -1.21182 |
| Bcas3os2 | Bcas3os2-001 | 0.0255999   | 4.94036   | 4.94036  |
| Bcat1    | Bcat1-002    | 0.0277636   | 1.39455   | 1.39455  |



|         |             |             |          |          |
|---------|-------------|-------------|----------|----------|
| Bcat2   | Bcat2-005   | 0.00214461  | 1.86711  | 1.86711  |
| Bccip   | Bccip-001   | 0.0227648   | 1.60547  | 1.60547  |
| Bcdin3d | Bcdin3d-201 | 0.0132344   | 1.45288  | 1.45288  |
| Bche    | Bche-001    | 0.0300686   | 13.3857  | 13.3857  |
| Bcl2    | Bcl2-001    | 0.0398819   | 1.28867  | 1.28867  |
| Bcl2l1  | Bcl2l1-002  | 0.0368919   | 0.38316  | -2.60988 |
| Bcl2l11 | Bcl2l11-001 | 0.00758186  | 0.482732 | -2.07154 |
| Bcl2l13 | Bcl2l13-001 | 0.0253809   | 1.12621  | 1.12621  |
| Bcl2l2  | Bcl2l2-001  | 0.0103827   | 1.18186  | 1.18186  |
| Bcl7b   | Bcl7b-003   | 0.0495461   | 1.4274   | 1.4274   |
| Bcl9l   | Bcl9l-201   | 0.00110892  | 0.719222 | -1.39039 |
| Bclaf1  | Bclaf1-002  | 0.00633414  | 0.761092 | -1.3139  |
| Bclaf1  | Bclaf1-008  | 0.0483574   | 1.4497   | 1.4497   |
| Bcor    | Bcor-003    | 0.0350087   | 0.727355 | -1.37484 |
| Bcr     | Bcr-201     | 0.0466384   | 0.941339 | -1.06232 |
| Begain  | Begain-001  | 0.00552847  | 0.697327 | -1.43405 |
| Bend4   | Bend4-001   | 0.00305752  | 0.30682  | -3.25924 |
| Bend4   | Bend4-002   | 0.00690348  | 0.726711 | -1.37606 |
| Bend6   | Bend6-001   | 0.000354907 | 2.04156  | 2.04156  |
| Bet1    | Bet1-001    | 0.049259    | 1.16562  | 1.16562  |
| Bex1    | Bex1-001    | 0.0299196   | 1.22505  | 1.22505  |
| Bgn     | Bgn-001     | 0.00579027  | 0.282697 | -3.53736 |
| Bicd1   | Bicd1-001   | 0.00848553  | 0.612536 | -1.63256 |
| Bid     | Bid-004     | 0.0382656   | 0.343228 | -2.91352 |
| Bin3    | Bin3-201    | 0.000615791 | 0.723215 | -1.38271 |
| Bivm    | Bivm-003    | 0.0361212   | 1.55766  | 1.55766  |
| Blcap   | Blcap-001   | 0.0193053   | 1.23731  | 1.23731  |
| Blcap   | Blcap-006   | 0.0494432   | 14.5303  | 14.5303  |
| Bloc1s1 | Bloc1s1-001 | 0.00030732  | 0.744622 | -1.34296 |
| Bloc1s2 | Bloc1s2-201 | 0.0255579   | 1.39879  | 1.39879  |
| Bloc1s4 | Bloc1s4-001 | 0.00426441  | 0.549866 | -1.81862 |
| Bloc1s5 | Bloc1s5-201 | 0.00388004  | 1.37383  | 1.37383  |
| Bloc1s6 | Bloc1s6-002 | 0.000170319 | 1.40052  | 1.40052  |
| Blvra   | Blvra-001   | 1.98482e-06 | 1.54462  | 1.54462  |
| Blzf1   | Blzf1-003   | 0.00128707  | 1.32786  | 1.32786  |
| Blzf1   | Blzf1-001   | 0.0473484   | 1.92383  | 1.92383  |
| Bmf     | Bmf-001     | 0.000534113 | 0.444801 | -2.24819 |
| Bmp1    | Bmp1-201    | 0.00528403  | 0.718743 | -1.39132 |
| Bmpr1a  | Bmpr1a-001  | 0.015981    | 0.75603  | -1.3227  |
| Bmpr2   | Bmpr2-001   | 0.0211471   | 0.76996  | -1.29877 |
| Bms1    | Bms1-002    | 0.0277334   | 1.76634  | 1.76634  |
| Bnip1   | Bnip1-001   | 0.0306765   | 1.20732  | 1.20732  |
| Bok     | Bok-001     | 0.000680626 | 0.660397 | -1.51424 |

|        |            |             |          |          |
|--------|------------|-------------|----------|----------|
| Bola1  | Bola1-002  | 0.0273724   | 1.51406  | 1.51406  |
| Bola3  | Bola3-002  | 0.0294848   | 1.59099  | 1.59099  |
| Bpgm   | Bpgm-001   | 0.0131368   | 1.46071  | 1.46071  |
| Bpgm   | Bpgm-002   | 0.0145344   | 1.51916  | 1.51916  |
| Bpgm   | Bpgm-005   | 0.0392251   | 2.18388  | 2.18388  |
| Bphl   | Bphl-201   | 0.00220271  | 1.85189  | 1.85189  |
| Bpi    | Bpi-001    | 0.00537433  | 4.64212  | 4.64212  |
| Bpi    | Bpi-002    | 0.00537434  | 4.64212  | 4.64212  |
| Bpnt1  | Bpnt1-001  | 0.0260823   | 1.39343  | 1.39343  |
| Bpnt1  | Bpnt1-002  | 0.0230801   | 2.07774  | 2.07774  |
| Bptf   | Bptf-005   | 0.0025558   | 1.75985  | 1.75985  |
| Braf   | Braf-001   | 0.000527374 | 0.849255 | -1.1775  |
| Brap   | Brap-005   | 0.0277302   | 0.363799 | -2.74877 |
| Brap   | Brap-002   | 0.0150627   | 1.88388  | 1.88388  |
| Brcc3  | Brcc3-007  | 0.0441437   | 1.33169  | 1.33169  |
| Brcc3  | Brcc3-003  | 0.0151006   | 1.37631  | 1.37631  |
| Brcc3  | Brcc3-005  | 1.77162e-05 | 4.33085  | 4.33085  |
| Brd2   | Brd2-005   | 0.000887241 | 1.30361  | 1.30361  |
| Brd2   | Brd2-001   | 0.015904    | 1.3134   | 1.3134   |
| Brd3   | Brd3-202   | 0.0455277   | 1.75554  | 1.75554  |
| Brd4   | Brd4-004   | 0.0406284   | 1.14376  | 1.14376  |
| Brd4   | Brd4-003   | 0.0342295   | 1.18619  | 1.18619  |
| Brd8   | Brd8-003   | 0.00910915  | 1.33441  | 1.33441  |
| Brdt   | Brdt-002   | 0.0208975   | 2.88194  | 2.88194  |
| Brf1   | Brf1-201   | 0.00156478  | 1.29015  | 1.29015  |
| Bri3   | Bri3-001   | 0.0107877   | 0.602913 | -1.65861 |
| Bri3bp | Bri3bp-001 | 0.0045391   | 0.812047 | -1.23146 |
| Bri3bp | Bri3bp-002 | 0.000355805 | 1.43903  | 1.43903  |
| Brinp2 | Brinp2-001 | 0.00220215  | 0.55081  | -1.81551 |
| Brk1   | Brk1-001   | 0.00910603  | 1.14801  | 1.14801  |
| Brms1l | Brms1l-201 | 0.0104922   | 0.805948 | -1.24078 |
| Brsk1  | Brsk1-002  | 0.0284886   | 0.490754 | -2.03768 |
| Brsk2  | Brsk2-002  | 0.0188646   | 2.41282  | 2.41282  |
| Brsk2  | Brsk2-014  | 0.0402976   | 23.9554  | 23.9554  |
| Brwd1  | Brwd1-006  | 0.0199248   | 0.617439 | -1.61959 |
| Brwd1  | Brwd1-001  | 0.00359253  | 0.782748 | -1.27755 |
| Brwd1  | Brwd1-002  | 0.0153719   | 0.789407 | -1.26677 |
| Brwd3  | Brwd3-001  | 0.00780898  | 0.808099 | -1.23747 |
| Brwd3  | Brwd3-002  | 0.0297765   | 1.79598  | 1.79598  |
| Bscl2  | Bscl2-004  | 0.0463066   | 0.748565 | -1.33589 |
| Bscl2  | Bscl2-007  | 0.0161202   | 1.67527  | 1.67527  |
| Btaf1  | Btaf1-001  | 0.0283388   | 1.32223  | 1.32223  |
| Btbd1  | Btbd1-201  | 0.00244977  | 0.764552 | -1.30796 |

|               |                   |             |          |          |
|---------------|-------------------|-------------|----------|----------|
| Btbd10        | Btbd10-001        | 0.0149365   | 1.42007  | 1.42007  |
| Btbd2         | Btbd2-001         | 0.0148963   | 1.21791  | 1.21791  |
| Btbd7         | Btbd7-201         | 0.0455689   | 0.849665 | -1.17693 |
| Btbd8         | Btbd8-001         | 0.0032205   | 1.68614  | 1.68614  |
| Btg1          | Btg1-201          | 0.0316671   | 1.31248  | 1.31248  |
| Btg2          | Btg2-001          | 0.0302958   | 0.627722 | -1.59306 |
| Btg3          | Btg3-001          | 0.0151672   | 1.12201  | 1.12201  |
| Bud13         | Bud13-001         | 0.021185    | 1.31903  | 1.31903  |
| Bud31         | Bud31-005         | 0.00729371  | 1.77485  | 1.77485  |
| Bves          | Bves-201          | 5.04197e-05 | 1.61245  | 1.61245  |
| C030034I22Rik | C030034I22Rik-001 | 0.0300631   | 2.12831  | 2.12831  |
| C030034I22Rik | C030034I22Rik-201 | 0.0111748   | 2.20765  | 2.20765  |
| C030037D09Rik | C030037D09Rik-001 | 0.0152778   | 1.22204  | 1.22204  |
| C130060C02Rik | C130060C02Rik-201 | 0.0109711   | 3.58779  | 3.58779  |
| C130080G10Rik | C130080G10Rik-002 | 0.0198262   | 5.3697   | 5.3697   |
| C1d           | C1d-004           | 0.040584    | 2.29364  | 2.29364  |
| C1qa          | C1qa-001          | 0.0236671   | 0.521219 | -1.91858 |
| C1qbp         | C1qbp-003         | 0.023985    | 0.510975 | -1.95704 |
| C1ql3         | C1ql3-001         | 0.0265352   | 0.682606 | -1.46497 |
| C1qtnf4       | C1qtnf4-001       | 0.0333993   | 0.585557 | -1.70778 |
| C1qtnf6       | C1qtnf6-001       | 0.0276945   | 0.799903 | -1.25015 |
| C1ra          | C1ra-001          | 0.0265633   | 1.41574  | 1.41574  |
| C1s1          | C1s1-002          | 0.0139273   | 0.350691 | -2.85151 |
| C230035I16Rik | C230035I16Rik-002 | 0.0092525   | 3.66703  | 3.66703  |
| C2cd3         | C2cd3-001         | 0.00190701  | 1.50716  | 1.50716  |
| C2cd3         | C2cd3-201         | 0.0326647   | 3.72232  | 3.72232  |
| C4a           | C4a-002           | 0.0283483   | 38.8513  | 38.8513  |
| C530043A13Rik | C530043A13Rik-003 | 0.0278776   | 5.04465  | 5.04465  |
| C730034F03Rik | C730034F03Rik-201 | 0.00921342  | 1.66256  | 1.66256  |
| C87436        | C87436-002        | 0.0337356   | 0.211417 | -4.73    |
| C87436        | C87436-006        | 0.0426963   | 1.58507  | 1.58507  |
| C920009B18Rik | C920009B18Rik-001 | 0.0343268   | 0.589884 | -1.69525 |
| Cab39         | Cab39-002         | 0.000896851 | 3.09768  | 3.09768  |
| Cab39I        | Cab39I-201        | 0.0010629   | 1.30853  | 1.30853  |
| Cabp1         | Cabp1-004         | 0.000230605 | 0.3877   | -2.57931 |
| Cabp1         | Cabp1-006         | 0.0135225   | 0.441758 | -2.26368 |
| Cabp1         | Cabp1-003         | 0.0200371   | 0.601905 | -1.66139 |
| Cabp1         | Cabp1-007         | 0.0181868   | 1.14878  | 1.14878  |
| Cabp1         | Cabp1-002         | 0.00936928  | 2.95619  | 2.95619  |
| Cacna1b       | Cacna1b-007       | 0.000791781 | 0.126848 | -7.88344 |
| Cacna1b       | Cacna1b-004       | 0.00907776  | 0.661341 | -1.51208 |
| Cacna1c       | Cacna1c-006       | 0.043646    | 0.397954 | -2.51285 |
| Cacna1c       | Cacna1c-001       | 0.00477258  | 0.447236 | -2.23595 |

|         |             |             |             |              |
|---------|-------------|-------------|-------------|--------------|
| Cacna1e | Cacna1e-201 | 0.0120407   | 0.0167883   | -59.5652     |
| Cacna1g | Cacna1g-001 | 0.00148916  | 0.386802    | -2.5853      |
| Cacna1g | Cacna1g-201 | 0.0166136   | 0.511468    | -1.95516     |
| Cacna1g | Cacna1g-014 | 0.0375402   | 0.723264    | -1.38262     |
| Cacna1i | Cacna1i-001 | 0.00376154  | 0.683537    | -1.46298     |
| Cacnb1  | Cacnb1-001  | 0.0399936   | 0.817719    | -1.22291     |
| Cacnb2  | Cacnb2-010  | 0.00334474  | 1.93894e-07 | -5.15745e+06 |
| Cacnb3  | Cacnb3-202  | 0.0379115   | 0.71884     | -1.39113     |
| Cacnb4  | Cacnb4-001  | 0.0422668   | 1.4779      | 1.4779       |
| Cacnb4  | Cacnb4-003  | 0.0422676   | 1.4779      | 1.4779       |
| Cacng4  | Cacng4-001  | 0.0399667   | 0.793435    | -1.26034     |
| Cacng8  | Cacng8-201  | 0.0383617   | 0.0677908   | -14.7513     |
| Cadm1   | Cadm1-001   | 0.00814094  | 0.423014    | -2.36399     |
| Cadm1   | Cadm1-003   | 0.0243302   | 0.724067    | -1.38109     |
| Cadm1   | Cadm1-004   | 0.00458487  | 2.50048     | 2.50048      |
| Cage1   | Cage1-003   | 0.000894144 | 2.14025     | 2.14025      |
| Cald1   | Cald1-006   | 0.0274142   | 0.554654    | -1.80292     |
| Cald1   | Cald1-001   | 0.00355379  | 0.594282    | -1.6827      |
| Cald1   | Cald1-016   | 0.0444661   | 0.602152    | -1.66071     |
| Calm2   | Calm2-001   | 0.00207796  | 0.908042    | -1.10127     |
| Calm3   | Calm3-001   | 0.0437987   | 0.933509    | -1.07123     |
| Calm3   | Calm3-004   | 0.0192245   | 2.54015     | 2.54015      |
| Calu    | Calu-009    | 0.0149969   | 0.564795    | -1.77055     |
| Calu    | Calu-001    | 2.82703e-05 | 0.597937    | -1.67242     |
| Calu    | Calu-002    | 0.000649128 | 0.641749    | -1.55824     |
| Camk2a  | Camk2a-001  | 0.0324141   | 0.776321    | -1.28813     |
| Camk2b  | Camk2b-003  | 0.0282858   | 0.506983    | -1.97245     |
| Camk2d  | Camk2d-001  | 0.00847077  | 0.488421    | -2.04742     |
| Camk2d  | Camk2d-009  | 0.0258872   | 0.597751    | -1.67294     |
| Camk2d  | Camk2d-023  | 0.0498327   | 0.704839    | -1.41876     |
| Camk2d  | Camk2d-004  | 0.0398168   | 0.782236    | -1.27839     |
| Camk2d  | Camk2d-016  | 0.0231859   | 2.75324     | 2.75324      |
| Camk2d  | Camk2d-012  | 0.0354995   | 3.1013      | 3.1013       |
| Camk2d  | Camk2d-007  | 0.0480081   | 4.08327     | 4.08327      |
| Camk2d  | Camk2d-018  | 0.0455921   | 4.87485     | 4.87485      |
| Camk4   | Camk4-201   | 0.000178605 | 1.18106     | 1.18106      |
| Camkk2  | Camkk2-006  | 0.00536566  | 0.738087    | -1.35485     |
| Camkk2  | Camkk2-005  | 0.00213888  | 3.22756     | 3.22756      |
| Camkv   | Camkv-001   | 0.044455    | 0.441617    | -2.26441     |
| Camsap1 | Camsap1-001 | 0.00315875  | 0.655468    | -1.52563     |
| Camsap1 | Camsap1-201 | 0.0143889   | 0.681038    | -1.46835     |
| Camsap1 | Camsap1-002 | 0.0011573   | 7.32968     | 7.32968      |
| Camsap2 | Camsap2-004 | 0.0367392   | 0.388607    | -2.5733      |

|           |               |             |             |              |
|-----------|---------------|-------------|-------------|--------------|
| Camsap3   | Camsap3-202   | 0.0330715   | 2.07156     | 2.07156      |
| Camta1    | Camta1-013    | 0.0191438   | 1.42621     | 1.42621      |
| Camta1    | Camta1-001    | 0.0162834   | 2.57764     | 2.57764      |
| Camta2    | Camta2-001    | 0.0341521   | 1.91286     | 1.91286      |
| Cap1      | Cap1-001      | 0.0141664   | 0.678464    | -1.47392     |
| Capn1     | Capn1-201     | 0.00811512  | 0.439163    | -2.27706     |
| Capn10    | Capn10-002    | 0.0165825   | 1.7239      | 1.7239       |
| Capn2     | Capn2-001     | 0.00326939  | 0.765952    | -1.30556     |
| Capn5     | Capn5-001     | 0.00445665  | 0.630096    | -1.58706     |
| Capn6     | Capn6-001     | 0.0154383   | 1.24445     | 1.24445      |
| Capn7     | Capn7-001     | 0.00737029  | 1.32201     | 1.32201      |
| Caprin1   | Caprin1-008   | 0.0399439   | 1.59866     | 1.59866      |
| Caprin2   | Caprin2-007   | 0.0300331   | 101.285     | 101.285      |
| Capzb     | Capzb-011     | 0.0155644   | 1.55118     | 1.55118      |
| Car4      | Car4-001      | 0.0397692   | 0.0041421   | -241.423     |
| Car8      | Car8-001      | 0.0376663   | 0.524566    | -1.90634     |
| Carkd     | Carkd-002     | 0.0119072   | 0.539775    | -1.85262     |
| Carnmt1   | Carnmt1-201   | 0.031498    | 1.22223     | 1.22223      |
| Cars      | Cars-001      | 0.0223748   | 1.43374     | 1.43374      |
| Cars      | Cars-002      | 0.000107043 | 1.48509     | 1.48509      |
| Casc3     | Casc3-002     | 0.039867    | 0.354016    | -2.82473     |
| Casc3     | Casc3-201     | 0.0480762   | 1.08545     | 1.08545      |
| Casc4     | Casc4-001     | 0.00843382  | 1.13594     | 1.13594      |
| Cask      | Cask-002      | 0.000713044 | 1.337       | 1.337        |
| Casp2     | Casp2-001     | 0.0296494   | 1.24449     | 1.24449      |
| Casp3     | Casp3-201     | 0.00409541  | 0.838631    | -1.19242     |
| Cast      | Cast-201      | 0.0259196   | 1.18366     | 1.18366      |
| Casz1     | Casz1-001     | 0.0270324   | 1.61681     | 1.61681      |
| Catsperd  | Catsperd-201  | 0.049661    | 1.53996     | 1.53996      |
| Catsperg1 | Catsperg1-008 | 0.0362683   | 0.20112     | -4.97217     |
| Catsperg1 | Catsperg1-011 | 0.016559    | 5.70439     | 5.70439      |
| Catsperg2 | Catsperg2-201 | 0.00124632  | 0.373788    | -2.67531     |
| Cbfa2t3   | Cbfa2t3-003   | 0.00765713  | 2.55062     | 2.55062      |
| Cbfb      | Cbfb-006      | 0.00318494  | 1.84484e-09 | -5.42053e+08 |
| Cbl       | Cbl-001       | 0.00479407  | 0.674658    | -1.48223     |
| Cbr1      | Cbr1-001      | 0.00634711  | 1.35248     | 1.35248      |
| Cbs       | Cbs-003       | 0.040432    | 0.592845    | -1.68678     |
| Cbx3      | Cbx3-001      | 0.0134853   | 2.05339     | 2.05339      |
| Cbx3      | Cbx3-007      | 0.0373483   | 27.2549     | 27.2549      |
| Cbx4      | Cbx4-001      | 0.00221165  | 1.42627     | 1.42627      |
| Cbx4      | Cbx4-002      | 0.000225981 | 1.49514     | 1.49514      |
| Cbx7      | Cbx7-007      | 0.0188955   | 0.809291    | -1.23565     |
| Cbx8      | Cbx8-002      | 0.0100268   | 1.62885     | 1.62885      |

|         |             |             |             |             |
|---------|-------------|-------------|-------------|-------------|
| Cby1    | Cby1-201    | 0.012435    | 1.6983      | 1.6983      |
| Cc2d1b  | Cc2d1b-001  | 0.00401719  | 0.605912    | -1.6504     |
| Cc2d1b  | Cc2d1b-005  | 0.00185767  | 11.1002     | 11.1002     |
| Ccar2   | Ccar2-201   | 0.00739507  | 0.912313    | -1.09612    |
| Ccdc107 | Ccdc107-001 | 0.0388405   | 1.41238     | 1.41238     |
| Ccdc107 | Ccdc107-002 | 0.0310831   | 1.52499     | 1.52499     |
| Ccdc108 | Ccdc108-001 | 0.0488658   | 2.70121     | 2.70121     |
| Ccdc114 | Ccdc114-001 | 0.0262025   | 16.7051     | 16.7051     |
| Ccdc115 | Ccdc115-001 | 0.00113668  | 1.36987     | 1.36987     |
| Ccdc115 | Ccdc115-002 | 0.0372139   | 1.47115     | 1.47115     |
| Ccdc127 | Ccdc127-001 | 0.000133985 | 1.46468     | 1.46468     |
| Ccdc127 | Ccdc127-005 | 0.00352211  | 1.47432     | 1.47432     |
| Ccdc127 | Ccdc127-002 | 0.00879556  | 4.50289     | 4.50289     |
| Ccdc132 | Ccdc132-002 | 0.0413553   | 0.467752    | -2.13788    |
| Ccdc132 | Ccdc132-001 | 0.0471382   | 1.54817     | 1.54817     |
| Ccdc132 | Ccdc132-005 | 0.00918019  | 1.63449     | 1.63449     |
| Ccdc134 | Ccdc134-201 | 0.019663    | 1.53124     | 1.53124     |
| Ccdc138 | Ccdc138-201 | 0.00173128  | 1.31756     | 1.31756     |
| Ccdc142 | Ccdc142-001 | 0.022741    | 0.587744    | -1.70142    |
| Ccdc148 | Ccdc148-001 | 0.000660836 | 2.27933     | 2.27933     |
| Ccdc15  | Ccdc15-201  | 0.0385614   | 1.23639     | 1.23639     |
| Ccdc157 | Ccdc157-001 | 0.0340238   | 1.31276     | 1.31276     |
| Ccdc163 | Ccdc163-004 | 0.0212349   | 2.15174     | 2.15174     |
| Ccdc173 | Ccdc173-001 | 0.0147405   | 1.50712     | 1.50712     |
| Ccdc174 | Ccdc174-002 | 0.0181418   | 1.49877     | 1.49877     |
| Ccdc181 | Ccdc181-001 | 0.0423771   | 1.22943     | 1.22943     |
| Ccdc186 | Ccdc186-001 | 0.00120625  | 1.14432     | 1.14432     |
| Ccdc22  | Ccdc22-001  | 0.0406925   | 0.853404    | -1.17178    |
| Ccdc23  | Ccdc23-001  | 0.0256121   | 1.38704     | 1.38704     |
| Ccdc24  | Ccdc24-006  | 0.0421208   | 0.523968    | -1.90851    |
| Ccdc28a | Ccdc28a-004 | 0.0130607   | 2.17186     | 2.17186     |
| Ccdc30  | Ccdc30-010  | 0.0169884   | 5.39047     | 5.39047     |
| Ccdc33  | Ccdc33-009  | 0.020837    | 2.01361e-07 | -4.9662e+06 |
| Ccdc34  | Ccdc34-004  | 0.0290596   | 0.430996    | -2.32021    |
| Ccdc34  | Ccdc34-001  | 0.0368807   | 1.14841     | 1.14841     |
| Ccdc38  | Ccdc38-003  | 0.0142218   | 1.8802      | 1.8802      |
| Ccdc39  | Ccdc39-001  | 0.0306182   | 1.52691     | 1.52691     |
| Ccdc39  | Ccdc39-002  | 0.0188101   | 13.2772     | 13.2772     |
| Ccdc43  | Ccdc43-003  | 0.0401182   | 0.413881    | -2.41615    |
| Ccdc43  | Ccdc43-002  | 0.0060729   | 2.0981      | 2.0981      |
| Ccdc43  | Ccdc43-004  | 7.23325e-05 | 2.80838     | 2.80838     |
| Ccdc47  | Ccdc47-001  | 0.0377229   | 1.26035     | 1.26035     |
| Ccdc47  | Ccdc47-003  | 0.0322709   | 1.29035     | 1.29035     |

|         |             |             |             |              |
|---------|-------------|-------------|-------------|--------------|
| Ccdc47  | Ccdc47-005  | 0.00383691  | 1.31005     | 1.31005      |
| Ccdc50  | Ccdc50-003  | 0.0135034   | 2.12422     | 2.12422      |
| Ccdc50  | Ccdc50-004  | 0.000228143 | 5.65201     | 5.65201      |
| Ccdc53  | Ccdc53-007  | 0.000554118 | 1.4544      | 1.4544       |
| Ccdc55  | Ccdc55-001  | 0.00923533  | 1.3203      | 1.3203       |
| Ccdc57  | Ccdc57-001  | 0.0011093   | 1.51128     | 1.51128      |
| Ccdc60  | Ccdc60-001  | 0.00477263  | 17.4237     | 17.4237      |
| Ccdc65  | Ccdc65-201  | 0.0228664   | 2.62884     | 2.62884      |
| Ccdc66  | Ccdc66-201  | 0.00606969  | 1.46012     | 1.46012      |
| Ccdc71l | Ccdc71l-001 | 0.0228349   | 0.49736     | -2.01062     |
| Ccdc73  | Ccdc73-001  | 0.0295123   | 1.306       | 1.306        |
| Ccdc74a | Ccdc74a-010 | 0.000359378 | 0.000112354 | -8900.45     |
| Ccdc74a | Ccdc74a-001 | 0.0210203   | 6.30337     | 6.30337      |
| Ccdc78  | Ccdc78-201  | 0.0474781   | 0.667077    | -1.49908     |
| Ccdc7b  | Ccdc7b-001  | 0.0238972   | 0.00775224  | -128.995     |
| Ccdc84  | Ccdc84-201  | 0.00219324  | 1.3651      | 1.3651       |
| Ccdc88a | Ccdc88a-003 | 0.0213792   | 1.40168     | 1.40168      |
| Ccdc9   | Ccdc9-011   | 0.0489601   | 0.282912    | -3.53467     |
| Ccdc90b | Ccdc90b-001 | 0.00134584  | 1.31853     | 1.31853      |
| Ccdc91  | Ccdc91-003  | 0.0425683   | 0.204763    | -4.8837      |
| Ccdc93  | Ccdc93-002  | 0.000609496 | 3.25294     | 3.25294      |
| Cchcr1  | Cchcr1-004  | 0.0120221   | 0.488521    | -2.047       |
| Cchcr1  | Cchcr1-001  | 0.0491907   | 0.604197    | -1.65509     |
| Ccl2    | Ccl2-001    | 0.00761385  | 0.130399    | -7.66877     |
| Ccl5    | Ccl5-001    | 0.0478444   | 0.42404     | -2.35827     |
| Ccnc    | Ccnc-002    | 0.0375833   | 2.17307     | 2.17307      |
| Ccnd1   | Ccnd1-002   | 0.00914689  | 4.96174     | 4.96174      |
| Ccnd3   | Ccnd3-005   | 0.024329    | 0.714158    | -1.40025     |
| Ccnd3   | Ccnd3-012   | 0.0204084   | 4.1485      | 4.1485       |
| Ccnd3   | Ccnd3-015   | 0.0372001   | 5.626       | 5.626        |
| Ccndbp1 | Ccndbp1-002 | 0.0265575   | 0.471852    | -2.11931     |
| Ccng1   | Ccng1-001   | 0.0264127   | 0.794479    | -1.25869     |
| Ccnh    | Ccnh-003    | 0.0102759   | 1.3226      | 1.3226       |
| Ccnk    | Ccnk-201    | 0.000105578 | 1.42539     | 1.42539      |
| Ccnl1   | Ccnl1-013   | 0.00234426  | 14.914      | 14.914       |
| Ccnt1   | Ccnt1-006   | 0.0419106   | 1463.86     | 1463.86      |
| Ccnt2   | Ccnt2-002   | 0.00369947  | 1.1979      | 1.1979       |
| Ccny    | Ccny-201    | 0.000646111 | 1.34963     | 1.34963      |
| Ccpg1   | Ccpg1-010   | 0.00755348  | 3.12943     | 3.12943      |
| Ccr2    | Ccr2-003    | 0.0456752   | 6.11249e-07 | -1.63599e+06 |
| Ccr2    | Ccr2-201    | 0.0383504   | 1743.96     | 1743.96      |
| Ccrl2   | Ccrl2-002   | 0.00685782  | 0.183851    | -5.4392      |
| Cct4    | Cct4-007    | 0.00828763  | 0.451512    | -2.21478     |

|          |              |             |          |          |
|----------|--------------|-------------|----------|----------|
| Cct7     | Cct7-001     | 0.0247909   | 1.13779  | 1.13779  |
| Cct7     | Cct7-006     | 0.00511979  | 1.22678  | 1.22678  |
| Cd151    | Cd151-203    | 0.00065845  | 0.683783 | -1.46245 |
| Cd164    | Cd164-001    | 0.000808483 | 0.723372 | -1.38241 |
| Cd209c   | Cd209c-001   | 0.018666    | 1.8789   | 1.8789   |
| Cd22     | Cd22-007     | 0.016758    | 1.51904  | 1.51904  |
| Cd248    | Cd248-201    | 0.000630628 | 0.448889 | -2.22772 |
| Cd24a    | Cd24a-201    | 0.00632617  | 0.756985 | -1.32103 |
| Cd274    | Cd274-001    | 0.00279914  | 2.4438   | 2.4438   |
| Cd2ap    | Cd2ap-201    | 0.0235845   | 1.14298  | 1.14298  |
| Cd2bp2   | Cd2bp2-004   | 0.0481813   | 1.56269  | 1.56269  |
| Cd300a   | Cd300a-001   | 0.00245114  | 1.51901  | 1.51901  |
| Cd300a   | Cd300a-002   | 0.00244956  | 1.51904  | 1.51904  |
| Cd40     | Cd40-201     | 0.039652    | 0.645488 | -1.54922 |
| Cd81     | Cd81-001     | 0.0395772   | 0.807675 | -1.23812 |
| Cdc123   | Cdc123-005   | 0.0359621   | 1.53754  | 1.53754  |
| Cdc25a   | Cdc25a-003   | 0.0105387   | 0.69193  | -1.44523 |
| Cdc25c   | Cdc25c-201   | 0.0121204   | 1.22854  | 1.22854  |
| Cdc27    | Cdc27-002    | 0.00404303  | 1.7777   | 1.7777   |
| Cdc37    | Cdc37-201    | 0.0416533   | 1.17038  | 1.17038  |
| Cdc42    | Cdc42-001    | 0.0295188   | 0.967907 | -1.03316 |
| Cdc42bpa | Cdc42bpa-009 | 0.0178605   | 0.366997 | -2.72482 |
| Cdc42bpa | Cdc42bpa-001 | 0.0121677   | 0.481315 | -2.07764 |
| Cdc42bpa | Cdc42bpa-004 | 0.0188232   | 1.55911  | 1.55911  |
| Cdc42bpa | Cdc42bpa-008 | 0.023397    | 1.63508  | 1.63508  |
| Cdc42bpa | Cdc42bpa-005 | 0.0204939   | 2.04864  | 2.04864  |
| Cdc42bpa | Cdc42bpa-017 | 0.0112792   | 3.92138  | 3.92138  |
| Cdc42bpg | Cdc42bpg-001 | 0.00287688  | 0.784137 | -1.27529 |
| Cdc42ep1 | Cdc42ep1-201 | 0.041322    | 0.639714 | -1.5632  |
| Cdc42ep2 | Cdc42ep2-201 | 0.0246116   | 0.438361 | -2.28123 |
| Cdc42ep4 | Cdc42ep4-002 | 0.0332435   | 3.03163  | 3.03163  |
| Cdc7     | Cdc7-001     | 0.00561299  | 1.28409  | 1.28409  |
| Cdc73    | Cdc73-002    | 0.00335093  | 1.39948  | 1.39948  |
| Cdc73    | Cdc73-003    | 0.0492976   | 1.56033  | 1.56033  |
| Cdca3    | Cdca3-003    | 0.0478552   | 0.77073  | -1.29747 |
| Cdca7    | Cdca7-003    | 0.0109629   | 0.289467 | -3.45463 |
| Cdca7l   | Cdca7l-001   | 0.0133165   | 1.36195  | 1.36195  |
| Cdca8    | Cdca8-004    | 0.0120667   | 2.62261  | 2.62261  |
| Cdh11    | Cdh11-201    | 0.0224312   | 1.2111   | 1.2111   |
| Cdh17    | Cdh17-001    | 0.0012663   | 0.567954 | -1.76071 |
| Cdh24    | Cdh24-201    | 0.0131362   | 1.38256  | 1.38256  |
| Cdhr2    | Cdhr2-001    | 0.0429574   | 1.68457  | 1.68457  |
| Cdip1    | Cdip1-002    | 0.024308    | 2.56583  | 2.56583  |



|          |              |             |             |              |
|----------|--------------|-------------|-------------|--------------|
| Cdipt    | Cdipt-001    | 0.0237926   | 1.50166     | 1.50166      |
| Cdk10    | Cdk10-201    | 0.00498715  | 0.621514    | -1.60897     |
| Cdk13    | Cdk13-201    | 0.000143754 | 0.699568    | -1.42945     |
| Cdk16    | Cdk16-007    | 0.00472463  | 1.88055     | 1.88055      |
| Cdk19    | Cdk19-202    | 0.0287965   | 0.471407    | -2.12131     |
| Cdk20    | Cdk20-201    | 0.00230829  | 2.30174     | 2.30174      |
| Cdk2ap1  | Cdk2ap1-002  | 0.0427085   | 2.58154     | 2.58154      |
| Cdk4     | Cdk4-004     | 0.0476311   | 0.508094    | -1.96814     |
| Cdk5     | Cdk5-003     | 0.000418637 | 0.542165    | -1.84446     |
| Cdk5     | Cdk5-001     | 0.00372667  | 0.589293    | -1.69695     |
| Cdk5rap1 | Cdk5rap1-201 | 0.0232544   | 1.63295     | 1.63295      |
| Cdk5rap2 | Cdk5rap2-003 | 0.0303376   | 1.16699     | 1.16699      |
| Cdk8     | Cdk8-008     | 0.00310943  | 1.49755     | 1.49755      |
| Cdk9     | Cdk9-003     | 0.0463755   | 0.240918    | -4.15079     |
| Cdkal1   | Cdkal1-001   | 0.0093122   | 1.26587     | 1.26587      |
| Cdkl3    | Cdkl3-009    | 0.00923624  | 0.176372    | -5.66984     |
| Cdkl3    | Cdkl3-013    | 0.0241256   | 1.32801     | 1.32801      |
| Cdkl4    | Cdkl4-201    | 0.000499014 | 2.29405     | 2.29405      |
| Cdkl5    | Cdkl5-003    | 0.00272982  | 0.773022    | -1.29362     |
| Cdnf     | Cdnf-001     | 0.00196744  | 1.98858     | 1.98858      |
| Cdpf1    | Cdpf1-001    | 0.01515     | 1.65519     | 1.65519      |
| Cdr2l    | Cdr2l-001    | 0.00994864  | 0.864069    | -1.15731     |
| Cds2     | Cds2-002     | 0.00469687  | 0.671072    | -1.49015     |
| Cds2     | Cds2-006     | 0.00217483  | 11.8189     | 11.8189      |
| Cdsn     | Cdsn-001     | 0.0388846   | 2.00145     | 2.00145      |
| Cdyl     | Cdyl-202     | 0.0155516   | 1.24628     | 1.24628      |
| Cebpb    | Cebpb-001    | 0.0176838   | 1.6485      | 1.6485       |
| Cebpg    | Cebpg-003    | 0.00757139  | 2.13489     | 2.13489      |
| Cebpg    | Cebpg-002    | 0.0053947   | 2.301       | 2.301        |
| Cecr5    | Cecr5-001    | 0.0138274   | 1.25337     | 1.25337      |
| Cecr5    | Cecr5-002    | 1.44221e-05 | 2.89646     | 2.89646      |
| Cela1    | Cela1-201    | 0.0005736   | 0.710606    | -1.40725     |
| Celf1    | Celf1-010    | 0.0256426   | 0.459287    | -2.17729     |
| Celf3    | Celf3-006    | 0.0402733   | 0.585801    | -1.70706     |
| Celf3    | Celf3-009    | 0.01484     | 0.639124    | -1.56464     |
| Celf3    | Celf3-007    | 0.0305276   | 1.29313     | 1.29313      |
| Celf3    | Celf3-013    | 0.00705584  | 4.65659     | 4.65659      |
| Celsr3   | Celsr3-005   | 0.000145425 | 0.734735    | -1.36103     |
| Cenpc1   | Cenpc1-003   | 0.0348915   | 5.32003e-11 | -1.87969e+10 |
| Cenpe    | Cenpe-001    | 0.0346486   | 1.17779     | 1.17779      |
| Cenpk    | Cenpk-201    | 0.0363461   | 1.43981     | 1.43981      |
| Cenpl    | Cenpl-005    | 0.0203414   | 0.21276     | -4.70013     |
| Cenpo    | Cenpo-004    | 0.0329946   | 1.62481     | 1.62481      |

|         |             |             |           |          |
|---------|-------------|-------------|-----------|----------|
| Cenpq   | Cenpq-001   | 0.0392974   | 1.33266   | 1.33266  |
| Cenpv   | Cenpv-001   | 0.0439914   | 0.781857  | -1.27901 |
| Cep104  | Cep104-001  | 0.023977    | 1.29001   | 1.29001  |
| Cep112  | Cep112-007  | 0.0296653   | 1.60992   | 1.60992  |
| Cep162  | Cep162-001  | 0.0191543   | 1.24001   | 1.24001  |
| Cep162  | Cep162-003  | 0.038837    | 2.14904   | 2.14904  |
| Cep164  | Cep164-001  | 0.0402815   | 0.893806  | -1.11881 |
| Cep170  | Cep170-001  | 0.0445363   | 1.27068   | 1.27068  |
| Cep170  | Cep170-007  | 0.0378086   | 1.75986   | 1.75986  |
| Cep170  | Cep170-012  | 0.0058126   | 3.31608   | 3.31608  |
| Cep19   | Cep19-001   | 0.0180444   | 1.5223    | 1.5223   |
| Cep19   | Cep19-002   | 0.0441411   | 15.0263   | 15.0263  |
| Cep192  | Cep192-201  | 0.0211526   | 0.87907   | -1.13757 |
| Cep250  | Cep250-005  | 0.0345457   | 1.32075   | 1.32075  |
| Cep350  | Cep350-001  | 0.0488799   | 0.895985  | -1.11609 |
| Cep350  | Cep350-005  | 0.00650693  | 1.65433   | 1.65433  |
| Cep57   | Cep57-011   | 0.0437894   | 0.512056  | -1.95291 |
| Cep57   | Cep57-012   | 0.00538061  | 2.7734    | 2.7734   |
| Cep5711 | Cep5711-002 | 0.0361916   | 1.81642   | 1.81642  |
| Cep63   | Cep63-002   | 0.0466888   | 1.68251   | 1.68251  |
| Cep72   | Cep72-201   | 0.00867376  | 1.34572   | 1.34572  |
| Cep83os | Cep83os-201 | 0.0150752   | 1.59848   | 1.59848  |
| Cep85l  | Cep85l-201  | 0.00858821  | 1.3914    | 1.3914   |
| Cep97   | Cep97-001   | 4.6646e-05  | 0.703166  | -1.42214 |
| Cept1   | Cept1-003   | 0.0462637   | 1.51072   | 1.51072  |
| Cercam  | Cercam-001  | 0.000661534 | 0.527208  | -1.89678 |
| Cerk    | Cerk-003    | 0.0377428   | 0.536184  | -1.86503 |
| Cerk    | Cerk-001    | 0.0477648   | 0.714755  | -1.39908 |
| Cers1   | Cers1-201   | 0.00704349  | 1.19363   | 1.19363  |
| Cers1   | Cers1-202   | 0.00462933  | 1.22446   | 1.22446  |
| Cers2   | Cers2-001   | 0.013726    | 0.796673  | -1.25522 |
| Cers4   | Cers4-001   | 0.000382471 | 0.533322  | -1.87504 |
| Cers4   | Cers4-002   | 0.0384629   | 0.616644  | -1.62168 |
| Cers5   | Cers5-002   | 0.0386174   | 0.450443  | -2.22004 |
| Cers5   | Cers5-001   | 0.019129    | 0.833042  | -1.20042 |
| Cers6   | Cers6-001   | 0.00119908  | 0.715006  | -1.39859 |
| Cetn4   | Cetn4-002   | 0.0476346   | 0.16386   | -6.10276 |
| Cetn4   | Cetn4-005   | 0.0245718   | 20.5149   | 20.5149  |
| Cfap221 | Cfap221-002 | 0.014723    | 7.69692   | 7.69692  |
| Cfap43  | Cfap43-201  | 0.00598152  | 0.742071  | -1.34758 |
| Cfap44  | Cfap44-001  | 0.0480734   | 7.51247   | 7.51247  |
| Cfap70  | Cfap70-001  | 0.00599644  | 0.0407307 | -24.5515 |
| Cfap70  | Cfap70-203  | 0.0247352   | 0.194827  | -5.13275 |

|        |            |             |             |          |
|--------|------------|-------------|-------------|----------|
| Cfap70 | Cfap70-201 | 0.00553875  | 6.13888     | 6.13888  |
| Cfap74 | Cfap74-201 | 0.00309514  | 0.0685131   | -14.5958 |
| Cfap74 | Cfap74-007 | 0.00313822  | 0.0736799   | -13.5722 |
| Cfap74 | Cfap74-004 | 0.0387218   | 2.14866     | 2.14866  |
| Cfap97 | Cfap97-201 | 0.00932795  | 1.37757     | 1.37757  |
| Cfap97 | Cfap97-004 | 0.0261411   | 5.47884     | 5.47884  |
| Cfb    | Cfb-001    | 0.0479896   | 913.042     | 913.042  |
| Cflar  | Cflar-003  | 0.000338326 | 0.852962    | -1.17238 |
| Cggbp1 | Cggbp1-002 | 0.009803    | 1.49061     | 1.49061  |
| Cgn    | Cgn-001    | 0.00472648  | 2.16664     | 2.16664  |
| Cgrrf1 | Cgrrf1-002 | 0.0486317   | 3.42333     | 3.42333  |
| Chac1  | Chac1-001  | 3.20877e-05 | 3.24039     | 3.24039  |
| Chac2  | Chac2-001  | 0.0220532   | 1.33118     | 1.33118  |
| Champ1 | Champ1-002 | 0.0029369   | 2.15799     | 2.15799  |
| Chchd3 | Chchd3-005 | 0.0151715   | 0.742088    | -1.34755 |
| Chchd3 | Chchd3-002 | 0.00302762  | 1.62216     | 1.62216  |
| Chchd6 | Chchd6-001 | 0.000267598 | 1.47203     | 1.47203  |
| Chd3os | Chd3os-001 | 0.00238591  | 1.5132      | 1.5132   |
| Chd4   | Chd4-008   | 0.0168282   | 0.65829     | -1.51909 |
| Chd6   | Chd6-003   | 0.0117974   | 0.909852    | -1.09908 |
| Chd6   | Chd6-010   | 0.0171503   | 4.3666      | 4.3666   |
| Chd7   | Chd7-005   | 0.00297648  | 0.281995    | -3.54616 |
| Chd7   | Chd7-001   | 0.00879946  | 0.741496    | -1.34863 |
| Chd7   | Chd7-201   | 0.0452893   | 1.58194     | 1.58194  |
| Chd8   | Chd8-002   | 0.0148925   | 0.655211    | -1.52623 |
| Chek1  | Chek1-006  | 0.00104463  | 2.77533     | 2.77533  |
| Chek2  | Chek2-002  | 0.000328922 | 1.51598     | 1.51598  |
| Chfr   | Chfr-011   | 0.0392178   | 0.471747    | -2.11978 |
| Chic2  | Chic2-002  | 0.00038231  | 1.33047     | 1.33047  |
| Chid1  | Chid1-005  | 0.00529161  | 0.250017    | -3.99973 |
| Chkb   | Chkb-001   | 0.0130783   | 0.538715    | -1.85627 |
| Chmp2b | Chmp2b-201 | 0.0250651   | 1.26927     | 1.26927  |
| Chmp3  | Chmp3-001  | 0.00217792  | 0.770126    | -1.29849 |
| Chmp3  | Chmp3-002  | 0.0016938   | 1.91484     | 1.91484  |
| Chmp3  | Chmp3-008  | 0.0487139   | 2.40751     | 2.40751  |
| Chn1   | Chn1-201   | 0.0258625   | 0.728907    | -1.37192 |
| Chn2   | Chn2-003   | 0.0402706   | 0.809842    | -1.23481 |
| Chn2   | Chn2-002   | 0.00139056  | 1.59808     | 1.59808  |
| Chn2   | Chn2-006   | 0.00426387  | 2.28405     | 2.28405  |
| Chp1   | Chp1-005   | 0.0259909   | 5.70141e-06 | -175395  |
| Chrna1 | Chrna1-001 | 0.00925351  | 1.27453     | 1.27453  |
| Chst11 | Chst11-001 | 8.04511e-06 | 0.380057    | -2.63119 |
| Chsy1  | Chsy1-001  | 0.0194161   | 0.706506    | -1.41542 |

|         |             |             |          |          |
|---------|-------------|-------------|----------|----------|
| Chtop   | Chtop-009   | 0.0349333   | 3.20187  | 3.20187  |
| Cib2    | Cib2-001    | 0.0401309   | 2.04977  | 2.04977  |
| Cic     | Cic-004     | 0.0236892   | 0.797488 | -1.25394 |
| Cirbp   | Cirbp-005   | 0.00335589  | 2.00943  | 2.00943  |
| Cisd1   | Cisd1-001   | 0.0127722   | 1.34599  | 1.34599  |
| Cish    | Cish-001    | 0.0230395   | 0.412115 | -2.42651 |
| Cish    | Cish-003    | 0.0409712   | 0.696963 | -1.4348  |
| Cit     | Cit-019     | 0.0177589   | 6.5683   | 6.5683   |
| Cited2  | Cited2-201  | 0.0494569   | 1.2688   | 1.2688   |
| Ciz1    | Ciz1-015    | 0.034643    | 2.1505   | 2.1505   |
| Ckap2   | Ckap2-201   | 6.08278e-06 | 1.22032  | 1.22032  |
| Clasp1  | Clasp1-022  | 0.000773795 | 0.737346 | -1.35621 |
| Clasp2  | Clasp2-201  | 0.00646851  | 1.1067   | 1.1067   |
| Clasp2  | Clasp2-203  | 0.00469214  | 1.15991  | 1.15991  |
| Clca2   | Clca2-001   | 0.00385522  | 0.13522  | -7.39533 |
| Clcn2   | Clcn2-005   | 0.0234379   | 0.22103  | -4.52428 |
| Clcn2   | Clcn2-001   | 0.047462    | 0.352542 | -2.83654 |
| Clcn2   | Clcn2-002   | 0.0404739   | 1.66785  | 1.66785  |
| Clcn3   | Clcn3-001   | 0.037691    | 0.844911 | -1.18356 |
| Clcn3   | Clcn3-009   | 0.0150197   | 1.49482  | 1.49482  |
| Clcn3   | Clcn3-006   | 0.0251804   | 3.69491  | 3.69491  |
| Clcn5   | Clcn5-004   | 0.0438745   | 1.74172  | 1.74172  |
| Clcn6   | Clcn6-004   | 0.00954771  | 2.61026  | 2.61026  |
| Cldn2   | Cldn2-001   | 0.0454837   | 0.195075 | -5.12622 |
| Cldnd1  | Cldnd1-003  | 0.0122042   | 23.7066  | 23.7066  |
| Clec11a | Clec11a-001 | 0.0438314   | 1.89257  | 1.89257  |
| Clec18a | Clec18a-002 | 0.0184052   | 0.143955 | -6.94659 |
| Clec2f  | Clec2f-002  | 0.0483927   | 20.8977  | 20.8977  |
| Clec2h  | Clec2h-001  | 0.013044    | 0.471338 | -2.12162 |
| Clec2l  | Clec2l-201  | 0.03851     | 1.425    | 1.425    |
| Clic1   | Clic1-001   | 1.73108e-05 | 0.670245 | -1.49199 |
| Clic4   | Clic4-001   | 3.29563e-05 | 1.64659  | 1.64659  |
| Clint1  | Clint1-002  | 0.00763735  | 1.7077   | 1.7077   |
| Clip1   | Clip1-011   | 6.29098e-05 | 0.363612 | -2.75018 |
| Clip1   | Clip1-009   | 0.0244582   | 0.446768 | -2.2383  |
| Clip1   | Clip1-003   | 0.0322925   | 2.65768  | 2.65768  |
| Clip2   | Clip2-002   | 0.0498019   | 0.618122 | -1.6178  |
| Clip2   | Clip2-001   | 0.0483064   | 0.746017 | -1.34045 |
| Clip4   | Clip4-201   | 0.0100219   | 1.69317  | 1.69317  |
| Clk1    | Clk1-011    | 0.000950159 | 3.82625  | 3.82625  |
| Clk2    | Clk2-004    | 0.0485703   | 0.542532 | -1.84321 |
| Clk4    | Clk4-004    | 0.0451311   | 0.511857 | -1.95367 |
| Cln3    | Cln3-016    | 0.0325626   | 2.65156  | 2.65156  |

|         |             |             |          |          |
|---------|-------------|-------------|----------|----------|
| Cln5    | Cln5-201    | 0.00356616  | 1.33979  | 1.33979  |
| Cln8    | Cln8-001    | 0.000688993 | 1.30296  | 1.30296  |
| Cln8    | Cln8-002    | 0.000903052 | 2.14646  | 2.14646  |
| Clock   | Clock-001   | 0.0353656   | 0.747631 | -1.33756 |
| Clpb    | Clpb-003    | 0.00889584  | 1.26127  | 1.26127  |
| Clpx    | Clpx-003    | 0.0158804   | 3.03403  | 3.03403  |
| Clstn1  | Clstn1-002  | 0.0301817   | 1.29819  | 1.29819  |
| Clstn3  | Clstn3-001  | 0.00241697  | 1.51003  | 1.51003  |
| Clu     | Clu-001     | 0.049352    | 0.855439 | -1.16899 |
| Cluap1  | Cluap1-003  | 0.043769    | 0.104755 | -9.54612 |
| Cluap1  | Cluap1-001  | 0.00708906  | 1.54715  | 1.54715  |
| Cluh    | Cluh-003    | 0.0293265   | 8.88611  | 8.88611  |
| Clvs1   | Clvs1-006   | 0.037537    | 1.71521  | 1.71521  |
| Clybl   | Clybl-201   | 0.00419264  | 1.65717  | 1.65717  |
| Cmas    | Cmas-001    | 0.0235994   | 1.1718   | 1.1718   |
| Cml1    | Cml1-001    | 0.000219558 | 2.69377  | 2.69377  |
| Cmss1   | Cmss1-201   | 0.00116007  | 1.9656   | 1.9656   |
| Cmtm4   | Cmtm4-201   | 0.000157746 | 0.754672 | -1.32508 |
| Cmtm6   | Cmtm6-201   | 0.00444134  | 0.803413 | -1.24469 |
| Cnbp    | Cnbp-006    | 0.00379759  | 1.20016  | 1.20016  |
| Cnep1r1 | Cnep1r1-004 | 0.0154661   | 2.4903   | 2.4903   |
| Cnga3   | Cnga3-001   | 0.0409206   | 1.90671  | 1.90671  |
| Cnga3   | Cnga3-002   | 0.00908941  | 3.51469  | 3.51469  |
| Cngb1   | Cngb1-008   | 0.00489667  | 0.157943 | -6.33139 |
| Cnih1   | Cnih1-001   | 0.0172754   | 0.825114 | -1.21195 |
| Cnih2   | Cnih2-201   | 0.0166075   | 0.735059 | -1.36044 |
| Cnih4   | Cnih4-004   | 0.000359072 | 0.361332 | -2.76754 |
| Cnih4   | Cnih4-001   | 0.00051855  | 0.523718 | -1.90943 |
| Cnn2    | Cnn2-002    | 0.0147678   | 0.495639 | -2.0176  |
| Cnn2    | Cnn2-001    | 0.00034111  | 0.519169 | -1.92615 |
| Cnn3    | Cnn3-004    | 0.0382346   | 0.114119 | -8.76277 |
| Cnn3    | Cnn3-002    | 0.0299679   | 1.49766  | 1.49766  |
| Cnnm2   | Cnnm2-202   | 0.0218019   | 1.37744  | 1.37744  |
| Cnot1   | Cnot1-202   | 0.0425986   | 1.15359  | 1.15359  |
| Cnot11  | Cnot11-003  | 0.0455512   | 1.3046   | 1.3046   |
| Cnot2   | Cnot2-003   | 0.00851961  | 2.06149  | 2.06149  |
| Cnot2   | Cnot2-006   | 0.0407335   | 2.62226  | 2.62226  |
| Cnot3   | Cnot3-003   | 0.037084    | 1.41959  | 1.41959  |
| Cnot4   | Cnot4-003   | 0.025073    | 0.632573 | -1.58085 |
| Cnot4   | Cnot4-004   | 0.00568619  | 2.12549  | 2.12549  |
| Cnot6   | Cnot6-001   | 0.000528926 | 0.53862  | -1.8566  |
| Cnot6l  | Cnot6l-001  | 0.00662604  | 0.766112 | -1.30529 |
| Cnot8   | Cnot8-001   | 0.0370441   | 1.15236  | 1.15236  |

|         |             |             |          |          |
|---------|-------------|-------------|----------|----------|
| Cnppd1  | Cnppd1-002  | 0.0483063   | 1.28735  | 1.28735  |
| Cnpy3   | Cnpy3-002   | 0.00494091  | 2.2733   | 2.2733   |
| Cnr2    | Cnr2-002    | 0.0197668   | 1.36087  | 1.36087  |
| Cnr2    | Cnr2-001    | 0.019767    | 1.36088  | 1.36088  |
| Cnst    | Cnst-001    | 0.0119796   | 1.53907  | 1.53907  |
| Cnst    | Cnst-003    | 0.00102577  | 2.60281  | 2.60281  |
| Cntln   | Cntln-201   | 0.00110569  | 1.71115  | 1.71115  |
| Cntnap2 | Cntnap2-004 | 0.0111879   | 2.33598  | 2.33598  |
| Cntrl   | Cntrl-008   | 0.0111493   | 0.536938 | -1.86241 |
| Cntrl   | Cntrl-001   | 0.00034722  | 1.70952  | 1.70952  |
| Cntrob  | Cntrob-001  | 0.0199688   | 1.21315  | 1.21315  |
| Coa7    | Coa7-005    | 0.0317166   | 11.4483  | 11.4483  |
| Cog2    | Cog2-001    | 0.000275784 | 1.36841  | 1.36841  |
| Cog6    | Cog6-001    | 1.84833e-06 | 1.46648  | 1.46648  |
| Cog6    | Cog6-002    | 0.013583    | 4.58156  | 4.58156  |
| Cog8    | Cog8-004    | 0.0116168   | 3.89231  | 3.89231  |
| Col11a2 | Col11a2-003 | 0.0426113   | 0.401412 | -2.4912  |
| Col14a1 | Col14a1-202 | 0.0126148   | 0.307685 | -3.25008 |
| Col14a1 | Col14a1-001 | 0.0126148   | 0.307685 | -3.25008 |
| Col14a1 | Col14a1-201 | 0.0126148   | 0.307685 | -3.25008 |
| Col18a1 | Col18a1-001 | 0.0420958   | 0.46183  | -2.1653  |
| Col22a1 | Col22a1-001 | 0.000112884 | 0.477583 | -2.09388 |
| Col24a1 | Col24a1-002 | 0.0284313   | 3481.53  | 3481.53  |
| Col25a1 | Col25a1-001 | 0.0434186   | 2.92991  | 2.92991  |
| Col26a1 | Col26a1-001 | 0.00264506  | 2.79271  | 2.79271  |
| Col26a1 | Col26a1-004 | 0.00264516  | 2.79271  | 2.79271  |
| Col4a1  | Col4a1-001  | 0.00051059  | 0.748926 | -1.33525 |
| Col4a2  | Col4a2-001  | 0.00013971  | 0.597375 | -1.67399 |
| Col7a1  | Col7a1-001  | 0.00207852  | 0.392896 | -2.5452  |
| Col7a1  | Col7a1-201  | 0.0020786   | 0.392922 | -2.54504 |
| Col7a1  | Col7a1-002  | 0.0457749   | 0.603678 | -1.65651 |
| Col9a3  | Col9a3-005  | 0.0297233   | 0.141587 | -7.06278 |
| Commd1  | Commd1-002  | 0.0369964   | 1.13494  | 1.13494  |
| Commd10 | Commd10-201 | 0.00266622  | 1.22827  | 1.22827  |
| Commd2  | Commd2-002  | 0.0290033   | 1.32742  | 1.32742  |
| Commd3  | Commd3-201  | 0.0268316   | 1.53713  | 1.53713  |
| Commd7  | Commd7-001  | 0.0326483   | 1.26341  | 1.26341  |
| Commd7  | Commd7-002  | 0.0150193   | 1.32886  | 1.32886  |
| Commd8  | Commd8-001  | 0.0408409   | 0.627825 | -1.5928  |
| Comt    | Comt-001    | 0.0046745   | 1.27486  | 1.27486  |
| Copa    | Copa-001    | 0.00251227  | 1.27741  | 1.27741  |
| Copa    | Copa-006    | 0.000157541 | 1.32471  | 1.32471  |
| Copb2   | Copb2-001   | 0.000271065 | 1.2574   | 1.2574   |

|        |            |             |          |          |
|--------|------------|-------------|----------|----------|
| Copg1  | Copg1-001  | 0.0050667   | 1.33394  | 1.33394  |
| Copg2  | Copg2-001  | 0.0033623   | 2.6663   | 2.6663   |
| Copg2  | Copg2-007  | 0.0274851   | 51.4341  | 51.4341  |
| Cops2  | Cops2-001  | 0.0466588   | 0.80612  | -1.24051 |
| Cops2  | Cops2-002  | 0.0069779   | 1.30233  | 1.30233  |
| Cops3  | Cops3-001  | 0.0102923   | 1.3995   | 1.3995   |
| Cops3  | Cops3-003  | 0.0144987   | 2.23483  | 2.23483  |
| Cops4  | Cops4-001  | 0.0453424   | 1.1369   | 1.1369   |
| Cops7b | Cops7b-201 | 0.00870889  | 1.40343  | 1.40343  |
| Copz1  | Copz1-201  | 0.000725105 | 1.19031  | 1.19031  |
| Coq2   | Coq2-001   | 0.0458082   | 1.13617  | 1.13617  |
| Coq3   | Coq3-001   | 0.00590002  | 1.39789  | 1.39789  |
| Coq4   | Coq4-005   | 0.0195394   | 3.65199  | 3.65199  |
| Coq5   | Coq5-002   | 0.00136737  | 1.95063  | 1.95063  |
| Coq9   | Coq9-001   | 0.0405099   | 1.22706  | 1.22706  |
| Corin  | Corin-002  | 0.0378315   | 0.198553 | -5.03644 |
| Corin  | Corin-001  | 0.0378315   | 0.198553 | -5.03644 |
| Coro1b | Coro1b-001 | 0.000177396 | 0.556308 | -1.79756 |
| Coro1c | Coro1c-002 | 0.0204227   | 0.655284 | -1.52606 |
| Coro1c | Coro1c-001 | 0.00159389  | 0.782077 | -1.27865 |
| Coro2a | Coro2a-001 | 0.00462593  | 1.31716  | 1.31716  |
| Coro2a | Coro2a-201 | 0.0285481   | 1.44574  | 1.44574  |
| Coro2a | Coro2a-002 | 0.0285675   | 1.44575  | 1.44575  |
| Coro2b | Coro2b-001 | 0.0320367   | 0.848357 | -1.17875 |
| Coro7  | Coro7-003  | 0.0301313   | 3.04327  | 3.04327  |
| Coro7  | Coro7-006  | 0.0228384   | 3.29454  | 3.29454  |
| Cort   | Cort-001   | 0.0192789   | 0.438203 | -2.28205 |
| Cox11  | Cox11-002  | 0.017833    | 2.87375  | 2.87375  |
| Cox14  | Cox14-201  | 0.0169589   | 1.28097  | 1.28097  |
| Cox16  | Cox16-007  | 0.00473221  | 1.87212  | 1.87212  |
| Cox17  | Cox17-002  | 0.0130419   | 0.563604 | -1.7743  |
| Cox19  | Cox19-007  | 0.0411773   | 1.55512  | 1.55512  |
| Cox19  | Cox19-006  | 0.0303518   | 6.11585  | 6.11585  |
| Cox4i1 | Cox4i1-001 | 0.0137485   | 0.922856 | -1.08359 |
| Cox6a1 | Cox6a1-001 | 0.00352483  | 0.827845 | -1.20796 |
| Cox6a1 | Cox6a1-002 | 0.0413679   | 2.49827  | 2.49827  |
| Cox6a2 | Cox6a2-001 | 0.00362524  | 2.35107  | 2.35107  |
| Cox7b  | Cox7b-003  | 0.0409854   | 1.13429  | 1.13429  |
| Cox7b2 | Cox7b2-002 | 0.0242054   | 0.78728  | -1.2702  |
| Cox7b2 | Cox7b2-201 | 0.0242054   | 0.78728  | -1.2702  |
| Cpa4   | Cpa4-001   | 0.0254745   | 1.38909  | 1.38909  |
| Cpeb2  | Cpeb2-006  | 0.0339235   | 2.00481  | 2.00481  |
| Cpne1  | Cpne1-008  | 0.0409088   | 17.1461  | 17.1461  |

|        |            |             |             |             |
|--------|------------|-------------|-------------|-------------|
| Cpne1  | Cpne1-019  | 0.0313144   | 4.35406e+06 | 4.35406e+06 |
| Cpne5  | Cpne5-004  | 5.4663e-05  | 0.587899    | -1.70097    |
| Cpne5  | Cpne5-002  | 0.0014512   | 0.705112    | -1.41821    |
| Cpne7  | Cpne7-003  | 0.0191622   | 0.415415    | -2.40723    |
| Cpne7  | Cpne7-001  | 0.0240911   | 6.44438     | 6.44438     |
| Cpne8  | Cpne8-002  | 0.0103097   | 0.716957    | -1.39478    |
| Cpox   | Cpox-201   | 1.53606e-05 | 1.83808     | 1.83808     |
| Cpsf6  | Cpsf6-001  | 0.00270183  | 0.887175    | -1.12717    |
| Cpsf6  | Cpsf6-003  | 0.0338934   | 1.24709     | 1.24709     |
| Cpt1c  | Cpt1c-201  | 0.0229681   | 0.773354    | -1.29307    |
| Cpxm1  | Cpxm1-002  | 0.00035699  | 26.1975     | 26.1975     |
| Cr1l   | Cr1l-004   | 0.00464671  | 1.51901     | 1.51901     |
| Cr1l   | Cr1l-005   | 0.00392808  | 1.67627     | 1.67627     |
| Crabp2 | Crabp2-001 | 0.0156902   | 1.75792     | 1.75792     |
| Crat   | Crat-006   | 0.026766    | 4.35278e-05 | -22973.8    |
| Crb1   | Crb1-001   | 0.0126359   | 2.48566     | 2.48566     |
| Crb2   | Crb2-001   | 0.0237242   | 0.718762    | -1.39128    |
| Creb1  | Creb1-001  | 0.00703642  | 0.713993    | -1.40057    |
| Creb1  | Creb1-007  | 0.0161324   | 2.79813     | 2.79813     |
| Creb3  | Creb3-201  | 0.0184596   | 2.22644     | 2.22644     |
| Crebzf | Crebzf-001 | 2.27763e-05 | 6.98762     | 6.98762     |
| Creld1 | Creld1-003 | 0.0339463   | 2.13676     | 2.13676     |
| Crem   | Crem-014   | 0.0033932   | 1.631       | 1.631       |
| Crip1  | Crip1-003  | 0.015526    | 0.389278    | -2.56886    |
| Crip1  | Crip1-201  | 0.000130097 | 0.565974    | -1.76687    |
| Crip2  | Crip2-003  | 0.0306339   | 0.564737    | -1.77074    |
| Crip2  | Crip2-001  | 9.20154e-05 | 0.713381    | -1.40178    |
| Cript  | Cript-001  | 0.00651029  | 1.27576     | 1.27576     |
| Crk    | Crk-001    | 0.0211862   | 0.751382    | -1.33088    |
| Crk    | Crk-005    | 0.0156799   | 168.487     | 168.487     |
| Crlf1  | Crlf1-001  | 0.0357423   | 0.455853    | -2.19369    |
| Crlf3  | Crlf3-001  | 0.00603733  | 1.50621     | 1.50621     |
| Crlf3  | Crlf3-006  | 0.0424827   | 3.35499     | 3.35499     |
| Crls1  | Crls1-003  | 0.00717295  | 1.63078     | 1.63078     |
| Crls1  | Crls1-001  | 0.0231277   | 1.65133     | 1.65133     |
| Crmp1  | Crmp1-003  | 0.0205292   | 0.855807    | -1.16849    |
| Crocc  | Crocc-007  | 0.0498467   | 0.280635    | -3.56334    |
| Crtap  | Crtap-001  | 0.0304445   | 0.7727      | -1.29416    |
| Crtc1  | Crtc1-005  | 0.00615699  | 1.41148     | 1.41148     |
| Crtc2  | Crtc2-004  | 0.0481034   | 0.226603    | -4.41299    |
| Crtc2  | Crtc2-006  | 0.00789311  | 1.85811     | 1.85811     |
| Cry1   | Cry1-201   | 0.000405085 | 1.5869      | 1.5869      |
| Cry2   | Cry2-001   | 0.000387844 | 1.72438     | 1.72438     |



|            |                |             |           |          |
|------------|----------------|-------------|-----------|----------|
| Cryab      | Cryab-201      | 0.0450305   | 0.748486  | -1.33603 |
| Cryz       | Cryz-010       | 0.0130202   | 0.0329904 | -30.3119 |
| Cryzl1     | Cryzl1-008     | 0.00173962  | 1.84859   | 1.84859  |
| Cryzl1     | Cryzl1-002     | 9.88248e-05 | 2.14662   | 2.14662  |
| Cryzl1     | Cryzl1-007     | 0.0396508   | 3.20697   | 3.20697  |
| Csdc2      | Csdc2-001      | 0.0481046   | 1.48147   | 1.48147  |
| Csde1      | Csde1-001      | 0.0176471   | 0.652234  | -1.53319 |
| Csde1      | Csde1-002      | 0.023788    | 0.759786  | -1.31616 |
| Cse1l      | Cse1l-005      | 0.0263026   | 0.602637  | -1.65937 |
| Cse1l      | Cse1l-003      | 0.0156786   | 2.32379   | 2.32379  |
| Csgalnact2 | Csgalnact2-002 | 0.0328826   | 0.558357  | -1.79097 |
| Csgalnact2 | Csgalnact2-001 | 0.00238607  | 1.26342   | 1.26342  |
| Csnk1a1    | Csnk1a1-001    | 0.0091931   | 0.794819  | -1.25815 |
| Csnk1a1    | Csnk1a1-002    | 0.00955825  | 1.24451   | 1.24451  |
| Csnk1d     | Csnk1d-002     | 0.0202721   | 0.72521   | -1.37891 |
| Csnk1g1    | Csnk1g1-001    | 0.0438756   | 0.838543  | -1.19254 |
| Csnk1g2    | Csnk1g2-202    | 0.00580015  | 0.788169  | -1.26876 |
| Csnk2b     | Csnk2b-008     | 0.0257845   | 2.07492   | 2.07492  |
| Cspp1      | Cspp1-015      | 0.0168218   | 0.273777  | -3.6526  |
| Csrnp3     | Csrnp3-001     | 0.00768167  | 0.76354   | -1.30969 |
| Csrnp3     | Csrnp3-004     | 0.0367017   | 4.16387   | 4.16387  |
| Csrp1      | Csrp1-001      | 0.00525689  | 0.710807  | -1.40685 |
| Csrp2bp    | Csrp2bp-009    | 0.0262348   | 0.153827  | -6.50082 |
| Csrp2bp    | Csrp2bp-002    | 0.025208    | 1.34904   | 1.34904  |
| Cst3       | Cst3-001       | 0.00850363  | 0.830576  | -1.20398 |
| Cstb       | Cstb-201       | 0.0121465   | 0.812013  | -1.23151 |
| Cstf1      | Cstf1-001      | 0.0147669   | 1.26985   | 1.26985  |
| Cstf2      | Cstf2-003      | 0.0353816   | 1.22974   | 1.22974  |
| Cstf2      | Cstf2-002      | 0.0133877   | 1.7601    | 1.7601   |
| Cstf2      | Cstf2-005      | 0.0435316   | 3.1679    | 3.1679   |
| Cstf3      | Cstf3-002      | 0.00340999  | 2.31498   | 2.31498  |
| Ctage5     | Ctage5-002     | 0.0314624   | 1.91221   | 1.91221  |
| Ctage5     | Ctage5-004     | 0.0417225   | 1.9958    | 1.9958   |
| Ctage5     | Ctage5-003     | 0.0138276   | 2.11375   | 2.11375  |
| Ctbp1      | Ctbp1-010      | 0.0311954   | 0.259943  | -3.84699 |
| Ctdsp2     | Ctdsp2-202     | 0.0203119   | 1.22351   | 1.22351  |
| Ctdspl2    | Ctdspl2-006    | 0.0477892   | 0.779558  | -1.28278 |
| Ctgf       | Ctgf-001       | 0.0133699   | 0.323929  | -3.0871  |
| Cth        | Cth-001        | 3.18476e-05 | 4.3843    | 4.3843   |
| Cth        | Cth-003        | 0.0453703   | 6.78874   | 6.78874  |
| Cthrc1     | Cthrc1-001     | 0.00144943  | 0.827347  | -1.20868 |
| Ctnna1     | Ctnna1-201     | 0.000433648 | 0.801266  | -1.24802 |
| Ctnnal1    | Ctnnal1-001    | 0.0266373   | 0.775084  | -1.29018 |

|           |               |             |          |          |
|-----------|---------------|-------------|----------|----------|
| Ctnnal1   | Ctnnal1-003   | 0.026327    | 1.90783  | 1.90783  |
| Ctnnbip1  | Ctnnbip1-002  | 0.00572075  | 3.55021  | 3.55021  |
| Ctnnd1    | Ctnnd1-020    | 0.0284046   | 0.340304 | -2.93855 |
| Ctnnd1    | Ctnnd1-010    | 0.0315712   | 0.375804 | -2.66096 |
| Ctnnd1    | Ctnnd1-001    | 0.0281769   | 0.82448  | -1.21289 |
| Ctns      | Ctns-001      | 5.66381e-05 | 1.64666  | 1.64666  |
| Ctps2     | Ctps2-002     | 0.00557289  | 1.53041  | 1.53041  |
| Ctr9      | Ctr9-006      | 0.0438509   | 0.482166 | -2.07398 |
| Ctsa      | Ctsa-004      | 0.0377851   | 0.599601 | -1.66778 |
| Ctsa      | Ctsa-011      | 0.000455779 | 0.757815 | -1.31958 |
| Ctsb      | Ctsb-201      | 0.00943738  | 0.874565 | -1.14343 |
| Ctsz      | Ctsz-001      | 0.016608    | 0.895828 | -1.11629 |
| Cttn      | Cttn-001      | 0.00323483  | 0.739302 | -1.35263 |
| Cttnbp2nl | Cttnbp2nl-002 | 0.00886371  | 0.705728 | -1.41698 |
| Ctu2      | Ctu2-001      | 0.029602    | 0.573438 | -1.74387 |
| Cuedc1    | Cuedc1-001    | 0.00136301  | 1.18286  | 1.18286  |
| Cul1      | Cul1-010      | 0.00815953  | 0.117159 | -8.53541 |
| Cul1      | Cul1-003      | 0.000798111 | 12.5942  | 12.5942  |
| Cul2      | Cul2-003      | 0.000951369 | 1.33703  | 1.33703  |
| Cul3      | Cul3-002      | 0.00014611  | 1.29187  | 1.29187  |
| Cul3      | Cul3-004      | 0.0128816   | 2.06001  | 2.06001  |
| Cul4a     | Cul4a-001     | 0.0207419   | 0.787367 | -1.27006 |
| Cul4a     | Cul4a-003     | 0.00644543  | 3.01301  | 3.01301  |
| Cul4b     | Cul4b-003     | 0.0113508   | 2.0312   | 2.0312   |
| Cul5      | Cul5-002      | 0.00034798  | 0.579983 | -1.72419 |
| Cul5      | Cul5-001      | 0.00841346  | 1.44134  | 1.44134  |
| Cul7      | Cul7-002      | 0.0268747   | 0.72461  | -1.38005 |
| Cuta      | Cuta-201      | 0.0136137   | 0.561924 | -1.7796  |
| Cutc      | Cutc-002      | 0.0465238   | 2.08314  | 2.08314  |
| Cux1      | Cux1-013      | 0.0104222   | 0.191963 | -5.20933 |
| Cux1      | Cux1-011      | 0.0307786   | 1.40734  | 1.40734  |
| Cux1      | Cux1-005      | 0.0309468   | 1.90535  | 1.90535  |
| Cwc15     | Cwc15-001     | 0.0127145   | 1.15134  | 1.15134  |
| Cwc22     | Cwc22-008     | 0.0439625   | 1.68664  | 1.68664  |
| Cwc22     | Cwc22-201     | 0.0264647   | 2.2134   | 2.2134   |
| Cwc27     | Cwc27-001     | 0.000789018 | 1.35172  | 1.35172  |
| Cwf19l2   | Cwf19l2-201   | 0.0295539   | 1.18395  | 1.18395  |
| Cxadr     | Cxadr-002     | 0.0449527   | 1.44972  | 1.44972  |
| Cxcl1     | Cxcl1-001     | 0.000637776 | 0.256383 | -3.90041 |
| Cxcl2     | Cxcl2-002     | 0.0338588   | 0.382826 | -2.61216 |
| Cxcr2     | Cxcr2-001     | 0.0381206   | 1.25664  | 1.25664  |
| Cxxc4     | Cxxc4-003     | 0.0318544   | 0.760782 | -1.31444 |
| Cxxc4     | Cxxc4-201     | 0.0124101   | 1.66869  | 1.66869  |

|               |                   |             |          |          |
|---------------|-------------------|-------------|----------|----------|
| Cyb5a         | Cyb5a-001         | 0.00929691  | 3.94063  | 3.94063  |
| Cyb5r1        | Cyb5r1-003        | 0.00603859  | 1.8391   | 1.8391   |
| Cyb5r1        | Cyb5r1-001        | 0.00062857  | 2.31089  | 2.31089  |
| Cyb5r1        | Cyb5r1-008        | 0.00162051  | 4.2827   | 4.2827   |
| Cyb5r2        | Cyb5r2-201        | 0.00109681  | 2.14083  | 2.14083  |
| Cyb5r3        | Cyb5r3-003        | 0.0191539   | 0.625217 | -1.59945 |
| Cyb5r3        | Cyb5r3-001        | 0.00172446  | 0.77425  | -1.29157 |
| Cyb5rl        | Cyb5rl-201        | 0.0432208   | 3.21036  | 3.21036  |
| Cyhr1         | Cyhr1-001         | 0.0495288   | 0.788912 | -1.26757 |
| Cyld          | Cyld-202          | 0.0459143   | 1.49369  | 1.49369  |
| Cyld          | Cyld-203          | 0.00554118  | 1.76734  | 1.76734  |
| Cyld          | Cyld-201          | 0.00245041  | 2.87316  | 2.87316  |
| Cyp27a1       | Cyp27a1-003       | 0.0125917   | 6.21026  | 6.21026  |
| Cyp2c55       | Cyp2c55-001       | 0.0138453   | 0.687753 | -1.45401 |
| Cyp2d22       | Cyp2d22-201       | 0.000564381 | 0.156338 | -6.39639 |
| Cyp2j9        | Cyp2j9-001        | 0.0175927   | 6.05374  | 6.05374  |
| Cyp4b1        | Cyp4b1-001        | 0.0149523   | 0.302976 | -3.30059 |
| Cyth4         | Cyth4-201         | 0.00660976  | 0.435425 | -2.29661 |
| Cytip         | Cytip-001         | 0.00488769  | 5.73794  | 5.73794  |
| D030018L15Rik | D030018L15Rik-001 | 0.0316495   | 4.17004  | 4.17004  |
| D030056L22Rik | D030056L22Rik-202 | 0.0235148   | 1.58798  | 1.58798  |
| D15Ertd621e   | D15Ertd621e-201   | 0.012043    | 0.761445 | -1.31329 |
| D16Ertd472e   | D16Ertd472e-001   | 0.00165791  | 1.30775  | 1.30775  |
| D16Ertd472e   | D16Ertd472e-003   | 0.0225455   | 1.7766   | 1.7766   |
| D17Wsu92e     | D17Wsu92e-001     | 0.0034148   | 0.82115  | -1.2178  |
| D1Ertd622e    | D1Ertd622e-002    | 0.0219495   | 0.750668 | -1.33215 |
| D2Wsu81e      | D2Wsu81e-004      | 0.0474913   | 0.192682 | -5.18989 |
| D330041H03Rik | D330041H03Rik-001 | 0.0118925   | 1.32721  | 1.32721  |
| D330041H03Rik | D330041H03Rik-004 | 0.0233337   | 1.83985  | 1.83985  |
| D330041H03Rik | D330041H03Rik-002 | 0.0377082   | 1.96923  | 1.96923  |
| D430042O09Rik | D430042O09Rik-004 | 0.0267451   | 1.79869  | 1.79869  |
| D430042O09Rik | D430042O09Rik-006 | 0.00937926  | 2.66728  | 2.66728  |
| D5Ertd579e    | D5Ertd579e-005    | 0.0420768   | 1.77223  | 1.77223  |
| D5Ertd579e    | D5Ertd579e-007    | 0.0366683   | 1.88376  | 1.88376  |
| D5Ertd615e    | D5Ertd615e-002    | 0.0445854   | 0.504178 | -1.98342 |
| D630023F18Rik | D630023F18Rik-001 | 0.00806039  | 4.73543  | 4.73543  |
| D6Wsu163e     | D6Wsu163e-001     | 0.00764474  | 1.75718  | 1.75718  |
| D6Wsu163e     | D6Wsu163e-005     | 0.013434    | 3.12626  | 3.12626  |
| D730003I15Rik | D730003I15Rik-002 | 0.00811937  | 2.11304  | 2.11304  |
| D830030K20Rik | D830030K20Rik-001 | 0.0258312   | 0.643541 | -1.5539  |
| D830044I16Rik | D830044I16Rik-003 | 0.0244178   | 0.498058 | -2.0078  |
| D8Ertd82e     | D8Ertd82e-001     | 0.0186058   | 1.23646  | 1.23646  |
| D930028M14Rik | D930028M14Rik-001 | 0.00280358  | 2.58597  | 2.58597  |

|         |             |             |           |          |
|---------|-------------|-------------|-----------|----------|
| Daam1   | Daam1-201   | 9.53815e-05 | 0.604241  | -1.65497 |
| Daam2   | Daam2-201   | 0.0217892   | 0.652875  | -1.53169 |
| Dab2ip  | Dab2ip-001  | 0.0250645   | 0.741543  | -1.34854 |
| Dag1    | Dag1-007    | 0.0141233   | 0.109499  | -9.13248 |
| Dag1    | Dag1-002    | 0.0265987   | 0.36253   | -2.75839 |
| Dag1    | Dag1-001    | 0.00138851  | 0.508028  | -1.9684  |
| Dagla   | Dagla-001   | 0.0282711   | 1.64349   | 1.64349  |
| Dalrd3  | Dalrd3-005  | 0.0191724   | 0.0207648 | -48.1584 |
| Dalrd3  | Dalrd3-001  | 0.00172853  | 0.524632  | -1.9061  |
| Dand5   | Dand5-201   | 0.000237568 | 2.31924   | 2.31924  |
| Dap3    | Dap3-001    | 0.0246331   | 0.759228  | -1.31713 |
| Dap3    | Dap3-011    | 0.0385744   | 1.86197   | 1.86197  |
| Dap3    | Dap3-007    | 0.0457608   | 5.20997   | 5.20997  |
| Dars    | Dars-001    | 0.0168106   | 1.15579   | 1.15579  |
| Dazap1  | Dazap1-005  | 0.0374655   | 1.21823   | 1.21823  |
| Dazap1  | Dazap1-002  | 0.00311417  | 1.4501    | 1.4501   |
| Dazap2  | Dazap2-201  | 1.90607e-05 | 0.481043  | -2.07882 |
| Dbf4    | Dbf4-003    | 0.00178234  | 0.499208  | -2.00317 |
| Dbf4    | Dbf4-006    | 0.0235229   | 0.540887  | -1.84882 |
| Dbhos   | Dbhos-001   | 0.0298991   | 1.39049   | 1.39049  |
| Dbn1    | Dbn1-003    | 0.0328423   | 0.483005  | -2.07037 |
| Dbn1    | Dbn1-010    | 0.038317    | 0.637715  | -1.5681  |
| Dbn1    | Dbn1-002    | 0.0082623   | 0.640153  | -1.56213 |
| Dbn1    | Dbn1-009    | 0.00306767  | 0.662096  | -1.51036 |
| Dbnnd2  | Dbnnd2-003  | 0.0264352   | 0.711139  | -1.40619 |
| Dbt     | Dbt-001     | 0.0367152   | 1.2665    | 1.2665   |
| Dcaf11  | Dcaf11-002  | 0.00470932  | 2.474     | 2.474    |
| Dcaf12  | Dcaf12-001  | 0.00159176  | 1.39597   | 1.39597  |
| Dcaf17  | Dcaf17-003  | 0.0409412   | 1.74118   | 1.74118  |
| Dcakd   | Dcakd-002   | 0.0154783   | 2.4134    | 2.4134   |
| Dcbld2  | Dcbld2-003  | 0.0356338   | 0.177229  | -5.64241 |
| Dcbld2  | Dcbld2-001  | 0.000842623 | 0.547575  | -1.82623 |
| Dcdc2a  | Dcdc2a-001  | 0.00340887  | 0.605437  | -1.6517  |
| Dcdc2b  | Dcdc2b-201  | 0.00541575  | 2.83465   | 2.83465  |
| Dcdc2c  | Dcdc2c-001  | 0.0381398   | 1.21271   | 1.21271  |
| Dchs1   | Dchs1-001   | 0.00610947  | 0.715842  | -1.39696 |
| Dclk1   | Dclk1-201   | 0.0483647   | 1.42257   | 1.42257  |
| Dclk1   | Dclk1-010   | 0.0422659   | 2.1658    | 2.1658   |
| Dclk1   | Dclk1-007   | 0.000131172 | 18.2932   | 18.2932  |
| Dclk2   | Dclk2-005   | 0.0306013   | 0.700791  | -1.42696 |
| Dclk2   | Dclk2-003   | 0.0390395   | 0.908528  | -1.10068 |
| Dclre1b | Dclre1b-006 | 0.0231145   | 4.22603   | 4.22603  |
| Dcp1a   | Dcp1a-201   | 0.00434842  | 1.23168   | 1.23168  |

|         |             |             |             |          |
|---------|-------------|-------------|-------------|----------|
| Dcp2    | Dcp2-001    | 0.0309009   | 0.642369    | -1.55674 |
| Dcp2    | Dcp2-002    | 0.0018992   | 5.39454     | 5.39454  |
| Dcst1   | Dcst1-004   | 0.00904689  | 2.42865     | 2.42865  |
| Dcst1   | Dcst1-006   | 0.00312782  | 10.5632     | 10.5632  |
| Dctd    | Dctd-006    | 0.014839    | 1.53781     | 1.53781  |
| Dctd    | Dctd-005    | 0.00616159  | 2.16135     | 2.16135  |
| Dctn1   | Dctn1-005   | 0.0204957   | 1.61308     | 1.61308  |
| Dctn2   | Dctn2-201   | 0.00435788  | 0.893783    | -1.11884 |
| Dctn3   | Dctn3-001   | 0.000499929 | 0.807419    | -1.23851 |
| Dctn4   | Dctn4-201   | 1.45161e-05 | 1.32428     | 1.32428  |
| Dctn5   | Dctn5-001   | 0.0134757   | 1.16732     | 1.16732  |
| Dcun1d1 | Dcun1d1-201 | 0.0157248   | 0.442107    | -2.2619  |
| Dcun1d3 | Dcun1d3-003 | 0.000814975 | 1.84037     | 1.84037  |
| Dcun1d4 | Dcun1d4-002 | 0.00369944  | 0.516273    | -1.93696 |
| Dcun1d4 | Dcun1d4-009 | 0.038623    | 11.989      | 11.989   |
| Ddah1   | Ddah1-002   | 0.00478677  | 2.41744     | 2.41744  |
| Ddah2   | Ddah2-001   | 0.000890575 | 0.60412     | -1.6553  |
| Ddb2    | Ddb2-004    | 0.0139306   | 1.82311     | 1.82311  |
| Ddhd1   | Ddhd1-004   | 0.0146218   | 0.599653    | -1.66763 |
| Ddhd1   | Ddhd1-009   | 0.0482988   | 0.727856    | -1.3739  |
| Ddi2    | Ddi2-201    | 0.00850975  | 1.6657      | 1.6657   |
| Ddr1    | Ddr1-202    | 0.00345243  | 0.519928    | -1.92334 |
| Ddr1    | Ddr1-002    | 0.00288855  | 0.531087    | -1.88293 |
| Ddr2    | Ddr2-002    | 0.0168323   | 2.21038     | 2.21038  |
| Ddr2    | Ddr2-201    | 0.000168482 | 3.2512      | 3.2512   |
| Ddt     | Ddt-001     | 0.00017976  | 1.7213      | 1.7213   |
| Ddx18   | Ddx18-003   | 0.00772863  | 1.88068     | 1.88068  |
| Ddx19a  | Ddx19a-001  | 0.0433266   | 1.30285     | 1.30285  |
| Ddx19b  | Ddx19b-001  | 0.0004201   | 0.715758    | -1.39712 |
| Ddx19b  | Ddx19b-002  | 0.00256154  | 4.61197     | 4.61197  |
| Ddx20   | Ddx20-001   | 0.0457322   | 1.42682     | 1.42682  |
| Ddx25   | Ddx25-001   | 0.0224737   | 1.57138     | 1.57138  |
| Ddx26b  | Ddx26b-006  | 0.0254226   | 0.2452      | -4.0783  |
| Ddx26b  | Ddx26b-005  | 0.0122362   | 1.55704     | 1.55704  |
| Ddx26b  | Ddx26b-001  | 0.00170994  | 1.69111     | 1.69111  |
| Ddx27   | Ddx27-002   | 0.0108459   | 1.61252     | 1.61252  |
| Ddx31   | Ddx31-002   | 0.0409467   | 1.26842e-06 | -788381  |
| Ddx39b  | Ddx39b-005  | 0.026127    | 1.18668     | 1.18668  |
| Ddx3x   | Ddx3x-003   | 0.0410893   | 2.9208      | 2.9208   |
| Ddx47   | Ddx47-005   | 0.0298827   | 0.504995    | -1.98022 |
| Ddx47   | Ddx47-004   | 0.0358598   | 2.33687     | 2.33687  |
| Ddx49   | Ddx49-001   | 0.0313633   | 1.30416     | 1.30416  |
| Ddx5    | Ddx5-009    | 0.0435259   | 0.515629    | -1.93938 |

|         |             |             |          |          |
|---------|-------------|-------------|----------|----------|
| Ddx5    | Ddx5-001    | 0.0054639   | 0.675464 | -1.48046 |
| Ddx50   | Ddx50-201   | 0.00247418  | 1.23901  | 1.23901  |
| Ddx52   | Ddx52-001   | 0.0322141   | 1.37066  | 1.37066  |
| Ddx55   | Ddx55-003   | 0.0374232   | 1.49473  | 1.49473  |
| Ddx55   | Ddx55-002   | 0.0240441   | 1.86349  | 1.86349  |
| Deb1    | Deb1-201    | 0.00545403  | 1.46387  | 1.46387  |
| Decr2   | Decr2-001   | 0.0387495   | 1.10912  | 1.10912  |
| Def8    | Def8-007    | 0.00132615  | 44.0618  | 44.0618  |
| Degs1   | Degs1-001   | 0.0223732   | 0.772167 | -1.29506 |
| Dennd2a | Dennd2a-001 | 0.00223901  | 0.680942 | -1.46855 |
| Dennd3  | Dennd3-002  | 0.0407672   | 20.2141  | 20.2141  |
| Dennd4a | Dennd4a-201 | 0.000615726 | 1.49918  | 1.49918  |
| Dennd4b | Dennd4b-005 | 0.0357355   | 0.59812  | -1.67191 |
| Dennd4c | Dennd4c-003 | 0.00893153  | 2.07548  | 2.07548  |
| Dennd5b | Dennd5b-002 | 0.0128693   | 3.02908  | 3.02908  |
| Dennd6b | Dennd6b-201 | 0.000248914 | 1.43078  | 1.43078  |
| Depdc1a | Depdc1a-001 | 0.0286492   | 1.2748   | 1.2748   |
| Depdc5  | Depdc5-001  | 0.0179181   | 1.57322  | 1.57322  |
| Depdc5  | Depdc5-015  | 0.000126691 | 2.34526  | 2.34526  |
| Depdc5  | Depdc5-006  | 0.0350966   | 2.43057  | 2.43057  |
| Depdc7  | Depdc7-001  | 0.00182043  | 1.38907  | 1.38907  |
| Deptor  | Deptor-003  | 0.0166674   | 4.7763   | 4.7763   |
| Derl1   | Derl1-201   | 9.83496e-05 | 1.24536  | 1.24536  |
| Derl2   | Derl2-001   | 0.00735139  | 0.776842 | -1.28726 |
| Derl2   | Derl2-003   | 0.00556689  | 1.39717  | 1.39717  |
| Derl2   | Derl2-007   | 0.033484    | 1.6235   | 1.6235   |
| Derl3   | Derl3-201   | 0.0386342   | 0.290945 | -3.43708 |
| Des     | Des-001     | 0.0118928   | 0.477989 | -2.0921  |
| Desi1   | Desi1-006   | 0.0412305   | 5.7433   | 5.7433   |
| Desi2   | Desi2-001   | 9.32547e-05 | 1.42428  | 1.42428  |
| Desi2   | Desi2-002   | 0.000529294 | 1.78269  | 1.78269  |
| Det1    | Det1-003    | 0.0429412   | 1.3808   | 1.3808   |
| Det1    | Det1-001    | 0.0101646   | 1.68549  | 1.68549  |
| Dffa    | Dffa-001    | 0.00949388  | 1.30952  | 1.30952  |
| Dfna5   | Dfna5-201   | 0.0158999   | 2.61574  | 2.61574  |
| Dfna5   | Dfna5-003   | 0.0281695   | 73.3156  | 73.3156  |
| Dgat1   | Dgat1-001   | 0.0419919   | 0.752286 | -1.32928 |
| Dgat1   | Dgat1-003   | 0.00483284  | 2.29203  | 2.29203  |
| Dgat2   | Dgat2-201   | 0.000100233 | 2.63373  | 2.63373  |
| Dgcr2   | Dgcr2-006   | 0.000164836 | 2.47411  | 2.47411  |
| Dgcr6   | Dgcr6-201   | 0.0127964   | 2.20894  | 2.20894  |
| Dgcr6   | Dgcr6-008   | 0.0473505   | 2.94488  | 2.94488  |
| Dgcr6   | Dgcr6-003   | 0.0269084   | 6.62164  | 6.62164  |

|        |            |             |             |             |
|--------|------------|-------------|-------------|-------------|
| Dgcr8  | Dgcr8-004  | 0.0146466   | 0.391565    | -2.55386    |
| Dgka   | Dgka-201   | 0.0172144   | 0.595865    | -1.67823    |
| Dgkd   | Dgkd-002   | 0.00467808  | 0.367729    | -2.71939    |
| Dgke   | Dgke-001   | 0.0270934   | 0.581086    | -1.72092    |
| Dgki   | Dgki-006   | 0.0125382   | 1.69593     | 1.69593     |
| Dgkz   | Dgkz-004   | 0.0228279   | 0.431531    | -2.31733    |
| Dgkz   | Dgkz-001   | 0.0129792   | 0.666053    | -1.50138    |
| Dgkz   | Dgkz-002   | 0.0214956   | 0.682225    | -1.46579    |
| Dhdds  | Dhdds-001  | 0.0402544   | 1.76925     | 1.76925     |
| Dhdds  | Dhdds-002  | 0.0224585   | 2.15013     | 2.15013     |
| Dhps   | Dhps-001   | 0.0145513   | 0.88108     | -1.13497    |
| Dhps   | Dhps-006   | 0.0238256   | 2.3974      | 2.3974      |
| Dhrs7  | Dhrs7-201  | 0.00074711  | 1.89242     | 1.89242     |
| Dhx15  | Dhx15-004  | 0.00473492  | 1.50396     | 1.50396     |
| Dhx15  | Dhx15-002  | 0.019069    | 2.42884     | 2.42884     |
| Dhx34  | Dhx34-003  | 0.0347892   | 0.0323325   | -30.9287    |
| Dhx38  | Dhx38-201  | 0.00690397  | 1.23002     | 1.23002     |
| Diap3  | Diap3-201  | 0.00232778  | 0.642785    | -1.55573    |
| Dido1  | Dido1-004  | 0.0100686   | 1.6429      | 1.6429      |
| Dido1  | Dido1-001  | 0.0229901   | 1.67987     | 1.67987     |
| Dido1  | Dido1-005  | 0.00903806  | 2.70279     | 2.70279     |
| Diexf  | Diexf-008  | 0.0329873   | 1.85003e+08 | 1.85003e+08 |
| Dip2a  | Dip2a-003  | 0.0320417   | 0.851177    | -1.17484    |
| Dip2b  | Dip2b-201  | 0.0318311   | 0.5524      | -1.81028    |
| Dip2b  | Dip2b-002  | 0.00628262  | 4.59216     | 4.59216     |
| Dip2c  | Dip2c-001  | 0.0262532   | 1.14544     | 1.14544     |
| Dip2c  | Dip2c-201  | 0.0192819   | 2.67142     | 2.67142     |
| Diras2 | Diras2-201 | 0.000689565 | 1.44993     | 1.44993     |
| Disp1  | Disp1-003  | 0.0460659   | 0.505256    | -1.97919    |
| Disp2  | Disp2-002  | 0.00035992  | 0.613675    | -1.62953    |
| Disp2  | Disp2-003  | 0.0183685   | 0.618       | -1.61812    |
| Disp2  | Disp2-001  | 0.00676943  | 0.65295     | -1.53151    |
| Dixdc1 | Dixdc1-008 | 0.0349086   | 16.8023     | 16.8023     |
| Dkc1   | Dkc1-004   | 0.0345124   | 0.0887967   | -11.2617    |
| Dkk3   | Dkk3-201   | 0.0474009   | 1.11091     | 1.11091     |
| Dlc1   | Dlc1-007   | 0.00240813  | 0.0910497   | -10.983     |
| Dlg2   | Dlg2-006   | 0.0487238   | 1.44896     | 1.44896     |
| Dlg4   | Dlg4-002   | 0.00837725  | 0.498383    | -2.00649    |
| Dlg4   | Dlg4-012   | 0.0352943   | 0.529489    | -1.88861    |
| Dlg5   | Dlg5-004   | 0.0444815   | 0.276302    | -3.61923    |
| Dlgap3 | Dlgap3-001 | 0.0218565   | 0.806705    | -1.23961    |
| Dlx1   | Dlx1-002   | 0.0142682   | 0.343706    | -2.90946    |
| Dlx1as | Dlx1as-002 | 0.0169019   | 3.4599      | 3.4599      |

|          |              |             |           |          |
|----------|--------------|-------------|-----------|----------|
| Dmap1    | Dmap1-002    | 0.0326575   | 0.402791  | -2.48268 |
| Dmap1    | Dmap1-006    | 0.0407311   | 6.24257   | 6.24257  |
| Dmbx1    | Dmbx1-002    | 0.0465204   | 5.41004   | 5.41004  |
| Dmbx1    | Dmbx1-201    | 0.0465204   | 5.41004   | 5.41004  |
| Dmpk     | Dmpk-006     | 0.0371316   | 0.154391  | -6.47706 |
| Dmtf1    | Dmtf1-009    | 0.0409179   | 2.11612   | 2.11612  |
| Dmxl2    | Dmxl2-001    | 0.0358882   | 1.62843   | 1.62843  |
| Dmxl2    | Dmxl2-008    | 0.0490146   | 3.73812   | 3.73812  |
| Dnah3    | Dnah3-201    | 0.0277354   | 4.66675   | 4.66675  |
| Dnaic1   | Dnaic1-003   | 0.00976032  | 74.866    | 74.866   |
| Dnaja1   | Dnaja1-201   | 0.0483216   | 0.383813  | -2.60544 |
| Dnaja1   | Dnaja1-002   | 0.0110103   | 0.760012  | -1.31577 |
| Dnaja3   | Dnaja3-002   | 0.000985851 | 1.41633   | 1.41633  |
| Dnaja3   | Dnaja3-001   | 0.00047122  | 2.37958   | 2.37958  |
| Dnajib14 | Dnajib14-001 | 0.0021316   | 0.745311  | -1.34172 |
| Dnajib2  | Dnajib2-008  | 0.0399424   | 0.360422  | -2.77452 |
| Dnajib2  | Dnajib2-003  | 0.0499911   | 1.89587   | 1.89587  |
| Dnajib4  | Dnajib4-006  | 0.00140123  | 1.40144   | 1.40144  |
| Dnajib4  | Dnajib4-001  | 0.0301195   | 5.07897   | 5.07897  |
| Dnajc1   | Dnajc1-006   | 0.00266831  | 9.00941   | 9.00941  |
| Dnajc12  | Dnajc12-001  | 0.00759554  | 2.09168   | 2.09168  |
| Dnajc15  | Dnajc15-201  | 0.0415273   | 1.25094   | 1.25094  |
| Dnajc16  | Dnajc16-001  | 0.0235257   | 1.24133   | 1.24133  |
| Dnajc19  | Dnajc19-001  | 0.0158861   | 1.59433   | 1.59433  |
| Dnajc2   | Dnajc2-006   | 0.0341595   | 1.30642   | 1.30642  |
| Dnajc21  | Dnajc21-001  | 0.00301836  | 1.29497   | 1.29497  |
| Dnajc24  | Dnajc24-003  | 0.0287535   | 4.93553   | 4.93553  |
| Dnajc27  | Dnajc27-202  | 0.00516535  | 2.78804   | 2.78804  |
| Dnajc28  | Dnajc28-201  | 0.0295201   | 1.66597   | 1.66597  |
| Dnajc5   | Dnajc5-004   | 0.0272088   | 2.88996   | 2.88996  |
| Dnajc7   | Dnajc7-004   | 0.0414417   | 1.19694   | 1.19694  |
| Dnajc7   | Dnajc7-010   | 0.0419579   | 1.44687   | 1.44687  |
| Dnase2b  | Dnase2b-002  | 0.0497806   | 0.170332  | -5.87088 |
| Dner     | Dner-003     | 0.0487831   | 0.117661  | -8.499   |
| Dnm2     | Dnm2-008     | 0.00858275  | 2.59093   | 2.59093  |
| Dnmt1    | Dnmt1-203    | 0.040861    | 0.649673  | -1.53924 |
| Dnmt3a   | Dnmt3a-201   | 0.0106967   | 0.0909963 | -10.9895 |
| Dnmt3a   | Dnmt3a-001   | 0.00109204  | 0.636907  | -1.57009 |
| Dnmt3a   | Dnmt3a-008   | 0.0362447   | 2.28073   | 2.28073  |
| Dnmt3a   | Dnmt3a-005   | 0.0345577   | 6.99716   | 6.99716  |
| Dnmt3a   | Dnmt3a-009   | 0.0115776   | 12.2233   | 12.2233  |
| Dnmt3b   | Dnmt3b-008   | 0.00480953  | 3.56514   | 3.56514  |
| Dnpep    | Dnpep-006    | 0.012945    | 0.521213  | -1.9186  |



|         |             |             |           |          |
|---------|-------------|-------------|-----------|----------|
| Dnpep   | Dnpep-004   | 0.010905    | 0.850288  | -1.17607 |
| Dock3   | Dock3-002   | 0.00324519  | 2.93556   | 2.93556  |
| Dock3   | Dock3-011   | 0.0446387   | 21.1698   | 21.1698  |
| Dock4   | Dock4-201   | 0.00152067  | 0.595192  | -1.68013 |
| Dock7   | Dock7-002   | 0.0149368   | 0.392881  | -2.5453  |
| Dock8   | Dock8-201   | 0.00168949  | 3.9658    | 3.9658   |
| Dopey1  | Dopey1-004  | 0.00854934  | 1.67949   | 1.67949  |
| Dopey1  | Dopey1-002  | 0.0060438   | 7.46068   | 7.46068  |
| Dot1l   | Dot1l-006   | 0.0160937   | 6.20402   | 6.20402  |
| Dpcd    | Dpcd-201    | 0.0319019   | 1.14567   | 1.14567  |
| Dpf1    | Dpf1-008    | 0.012771    | 0.123966  | -8.06674 |
| Dpf2    | Dpf2-003    | 0.0269003   | 5.8435    | 5.8435   |
| Dpf3    | Dpf3-203    | 0.0055256   | 0.224446  | -4.45541 |
| Dpf3    | Dpf3-202    | 0.0483239   | 1.23453   | 1.23453  |
| Dph3    | Dph3-003    | 0.019112    | 0.0531883 | -18.8011 |
| Dph5    | Dph5-002    | 0.0261811   | 1.81094   | 1.81094  |
| Dph7    | Dph7-003    | 0.0138553   | 1.92971   | 1.92971  |
| Dph7    | Dph7-004    | 0.0149625   | 8.24468   | 8.24468  |
| Dpm1    | Dpm1-006    | 0.0341459   | 2.73453   | 2.73453  |
| Dpp7    | Dpp7-001    | 0.00232932  | 0.463193  | -2.15893 |
| Dppa4   | Dppa4-202   | 0.0125411   | 0.469427  | -2.13026 |
| Dpy19l1 | Dpy19l1-001 | 0.00794329  | 0.36853   | -2.71348 |
| Dpyd    | Dpyd-005    | 0.0346303   | 0.218936  | -4.56754 |
| Dpysl2  | Dpysl2-001  | 0.000713007 | 0.793972  | -1.25949 |
| Dpysl3  | Dpysl3-006  | 0.0215813   | 0.331613  | -3.01556 |
| Dpysl3  | Dpysl3-001  | 2.89139e-06 | 0.456188  | -2.19208 |
| Dpysl3  | Dpysl3-002  | 0.0117496   | 0.594278  | -1.68271 |
| Dpysl5  | Dpysl5-001  | 0.0123186   | 0.697156  | -1.4344  |
| Dram1   | Dram1-001   | 0.0109821   | 5.89238   | 5.89238  |
| Dram1   | Dram1-002   | 0.0109821   | 5.89238   | 5.89238  |
| Dram2   | Dram2-003   | 0.00016008  | 2.22795   | 2.22795  |
| Drosha  | Drosha-001  | 0.0113317   | 1.56114   | 1.56114  |
| Dscam   | Dscam-001   | 0.00946044  | 1.38978   | 1.38978  |
| Dscc1   | Dscc1-003   | 0.02989     | 0.522363  | -1.91438 |
| Dst     | Dst-001     | 0.00135706  | 0.13399   | -7.46322 |
| Dst     | Dst-201     | 0.00405653  | 0.144292  | -6.93037 |
| Dst     | Dst-013     | 0.00831823  | 0.166891  | -5.99195 |
| Dst     | Dst-009     | 0.00275636  | 0.556962  | -1.79545 |
| Dst     | Dst-016     | 0.0283418   | 0.70196   | -1.42458 |
| Dst     | Dst-019     | 0.0289085   | 2.0893    | 2.0893   |
| Dst     | Dst-003     | 0.0175577   | 2.10543   | 2.10543  |
| Dst     | Dst-007     | 0.0453406   | 3.62293   | 3.62293  |
| Dst     | Dst-018     | 0.027604    | 4.72863   | 4.72863  |

|               |                   |             |           |          |
|---------------|-------------------|-------------|-----------|----------|
| Dstn          | Dstn-001          | 0.0186379   | 0.843554  | -1.18546 |
| Dstyk         | Dstyk-001         | 0.0421641   | 0.668706  | -1.49542 |
| Dtd1          | Dtd1-001          | 0.00186385  | 1.82197   | 1.82197  |
| Dtnb          | Dtnb-023          | 0.0146744   | 0.0222463 | -44.9512 |
| Dtnb          | Dtnb-005          | 0.0010325   | 2.30789   | 2.30789  |
| Dtx2          | Dtx2-003          | 0.0433943   | 11.9315   | 11.9315  |
| Dus2          | Dus2-001          | 0.00238558  | 1.39861   | 1.39861  |
| Dus2          | Dus2-003          | 0.017448    | 1.56423   | 1.56423  |
| Dusp19        | Dusp19-001        | 0.0241437   | 1.68168   | 1.68168  |
| Dusp7         | Dusp7-001         | 0.0192972   | 1.2978    | 1.2978   |
| Dusp9         | Dusp9-001         | 0.0100094   | 0.361709  | -2.76465 |
| Dvl2          | Dvl2-006          | 0.0332955   | 1.79622   | 1.79622  |
| Dvl2          | Dvl2-201          | 0.0332955   | 1.79622   | 1.79622  |
| Dync1h1       | Dync1h1-006       | 0.0235939   | 0.0534858 | -18.6965 |
| Dync1h1       | Dync1h1-005       | 0.0236947   | 0.422197  | -2.36856 |
| Dync1h1       | Dync1h1-001       | 0.0293198   | 0.857061  | -1.16678 |
| Dync1i2       | Dync1i2-006       | 0.0121077   | 0.800279  | -1.24956 |
| Dync1li2      | Dync1li2-201      | 0.00512111  | 1.22317   | 1.22317  |
| Dync2li1      | Dync2li1-201      | 0.00500665  | 1.31539   | 1.31539  |
| Dynll1        | Dynll1-001        | 0.00794755  | 0.720783  | -1.38738 |
| Dynll2        | Dynll2-201        | 0.0433413   | 1.47656   | 1.47656  |
| Dynlrb1       | Dynlrb1-001       | 0.00558101  | 1.17701   | 1.17701  |
| Dynlt1b       | Dynlt1b-201       | 0.018083    | 1.23264   | 1.23264  |
| Dynlt1f       | Dynlt1f-201       | 0.0392959   | 1.14568   | 1.14568  |
| Dysf          | Dysf-018          | 0.0130157   | 0.50103   | -1.99589 |
| Dyx1c1        | Dyx1c1-002        | 0.0316842   | 3.41199   | 3.41199  |
| E230016M11Rik | E230016M11Rik-001 | 0.00380879  | 7.3823    | 7.3823   |
| E2f3          | E2f3-002          | 0.0126517   | 4.30152   | 4.30152  |
| E2f6          | E2f6-201          | 0.0094347   | 1.3722    | 1.3722   |
| E2f7          | E2f7-007          | 0.0432124   | 158.322   | 158.322  |
| E330009J07Rik | E330009J07Rik-001 | 3.98373e-06 | 1.53077   | 1.53077  |
| E430025E21Rik | E430025E21Rik-201 | 0.0439989   | 1.24956   | 1.24956  |
| E4f1          | E4f1-201          | 0.025839    | 1.21317   | 1.21317  |
| Eaf1          | Eaf1-201          | 0.00970537  | 0.787494  | -1.26985 |
| Eapp          | Eapp-001          | 0.0102529   | 0.662887  | -1.50855 |
| Eapp          | Eapp-201          | 0.000140374 | 0.729758  | -1.37032 |
| Eapp          | Eapp-002          | 0.00208595  | 1.31935   | 1.31935  |
| Eapp          | Eapp-005          | 0.000190599 | 8.0427    | 8.0427   |
| Ears2         | Ears2-003         | 0.00388524  | 2.12122   | 2.12122  |
| Ebf4          | Ebf4-002          | 0.0240775   | 0.495469  | -2.01829 |
| Ebpl          | Ebpl-201          | 0.0198457   | 1.29393   | 1.29393  |
| Ecel1         | Ecel1-004         | 0.0419494   | 0.436437  | -2.29128 |
| Ech1          | Ech1-001          | 0.00125598  | 0.532053  | -1.87951 |

|         |             |             |           |          |
|---------|-------------|-------------|-----------|----------|
| Echdc1  | Echdc1-002  | 0.0248277   | 1.27778   | 1.27778  |
| Echdc1  | Echdc1-001  | 0.0246336   | 1.30467   | 1.30467  |
| Echdc1  | Echdc1-003  | 0.0024113   | 4.79685   | 4.79685  |
| Echdc2  | Echdc2-004  | 0.00370249  | 2.08177   | 2.08177  |
| Ecm1    | Ecm1-002    | 0.0464595   | 0.274114  | -3.64812 |
| Ecm2    | Ecm2-201    | 0.00111533  | 1.48342   | 1.48342  |
| Ecschr  | Ecschr-002  | 0.0306819   | 0.389516  | -2.56729 |
| Ect2    | Ect2-004    | 0.0361399   | 1.85838   | 1.85838  |
| Edc3    | Edc3-001    | 0.0315049   | 1.15033   | 1.15033  |
| Edem1   | Edem1-004   | 0.0338101   | 1.31259   | 1.31259  |
| Edem3   | Edem3-004   | 0.0453788   | 4.6805    | 4.6805   |
| Edf1    | Edf1-002    | 0.00486999  | 1.86557   | 1.86557  |
| Edrf1   | Edrf1-003   | 0.00031156  | 1.26634   | 1.26634  |
| Edrf1   | Edrf1-001   | 0.0166145   | 1.44333   | 1.44333  |
| Eea1    | Eea1-201    | 0.0352725   | 1.12456   | 1.12456  |
| Eed     | Eed-001     | 0.00760392  | 1.10871   | 1.10871  |
| Eef1b2  | Eef1b2-003  | 0.0169716   | 0.570215  | -1.75373 |
| Eef1b2  | Eef1b2-009  | 0.0395736   | 0.860792  | -1.16172 |
| Eefsec  | Eefsec-002  | 0.00788061  | 1.27596   | 1.27596  |
| Efcab14 | Efcab14-005 | 0.0447955   | 0.509682  | -1.96201 |
| Efcab14 | Efcab14-002 | 0.0084482   | 1.44701   | 1.44701  |
| Efcab14 | Efcab14-004 | 0.0219323   | 12.7731   | 12.7731  |
| Efcab7  | Efcab7-004  | 0.0250051   | 42374.2   | 42374.2  |
| Efna4   | Efna4-001   | 0.0287353   | 0.476403  | -2.09906 |
| Efr3a   | Efr3a-001   | 0.000633661 | 1.61835   | 1.61835  |
| Efr3a   | Efr3a-002   | 0.0290441   | 1.69184   | 1.69184  |
| Efr3a   | Efr3a-007   | 0.0427062   | 5.18373   | 5.18373  |
| Eftud1  | Eftud1-001  | 0.00730028  | 0.660856  | -1.51319 |
| Eftud2  | Eftud2-004  | 0.0361561   | 0.498104  | -2.00761 |
| Eftud2  | Eftud2-002  | 0.00976862  | 1.35176   | 1.35176  |
| Egfl6   | Egfl6-001   | 0.0404853   | 3.18883   | 3.18883  |
| Egfl7   | Egfl7-016   | 0.0299443   | 0.0150555 | -66.4211 |
| Ehbp111 | Ehbp111-202 | 0.00529695  | 0.60889   | -1.64233 |
| Ehd4    | Ehd4-001    | 0.000788227 | 1.39945   | 1.39945  |
| Ehmt1   | Ehmt1-001   | 0.0489243   | 0.406604  | -2.4594  |
| Ehmt1   | Ehmt1-015   | 0.0448556   | 1.17887   | 1.17887  |
| Ehmt1   | Ehmt1-012   | 0.0295261   | 3.26883   | 3.26883  |
| Ehmt2   | Ehmt2-001   | 0.0136473   | 0.621068  | -1.61013 |
| Ehmt2   | Ehmt2-003   | 0.0152702   | 0.706512  | -1.4154  |
| Ei24    | Ei24-008    | 0.0237441   | 0.500388  | -1.99845 |
| Eid2b   | Eid2b-201   | 0.0470919   | 1.41294   | 1.41294  |
| Eif1    | Eif1-001    | 0.00767242  | 1.39963   | 1.39963  |
| Eif1    | Eif1-005    | 0.00839919  | 1.45417   | 1.45417  |

|          |              |             |             |             |
|----------|--------------|-------------|-------------|-------------|
| Eif1     | Eif1-003     | 0.0021156   | 1.88629     | 1.88629     |
| Eif1a    | Eif1a-201    | 0.00738766  | 0.730325    | -1.36925    |
| Eif2ak2  | Eif2ak2-002  | 0.0258641   | 0.129283    | -7.73496    |
| Eif2b3   | Eif2b3-004   | 0.0403618   | 2.63363e+06 | 2.63363e+06 |
| Eif2d    | Eif2d-006    | 0.00832907  | 1.5618      | 1.5618      |
| Eif2s2   | Eif2s2-201   | 0.000107333 | 1.38018     | 1.38018     |
| Eif2s2   | Eif2s2-005   | 0.00930316  | 1.90321     | 1.90321     |
| Eif2s2   | Eif2s2-003   | 0.0275165   | 3.53232     | 3.53232     |
| Eif2s3x  | Eif2s3x-001  | 0.0378914   | 1.24028     | 1.24028     |
| Eif3a    | Eif3a-201    | 0.0295937   | 1.10131     | 1.10131     |
| Eif3c    | Eif3c-001    | 7.62787e-05 | 1.37552     | 1.37552     |
| Eif3c    | Eif3c-003    | 0.00160769  | 1.92524     | 1.92524     |
| Eif3d    | Eif3d-201    | 0.00263127  | 1.16165     | 1.16165     |
| Eif3f    | Eif3f-003    | 0.0336668   | 0.451441    | -2.21513    |
| Eif3g    | Eif3g-201    | 0.0237152   | 1.26135     | 1.26135     |
| Eif3i    | Eif3i-002    | 0.0474219   | 1.84189     | 1.84189     |
| Eif3i    | Eif3i-004    | 0.0117487   | 3.18769e+08 | 3.18769e+08 |
| Eif4a1   | Eif4a1-013   | 0.0117369   | 5.84859     | 5.84859     |
| Eif4e    | Eif4e-001    | 0.000536075 | 1.13307     | 1.13307     |
| Eif4e    | Eif4e-005    | 0.000733141 | 1.22917     | 1.22917     |
| Eif4e    | Eif4e-003    | 0.0140645   | 1.63289     | 1.63289     |
| Eif4e3   | Eif4e3-001   | 0.00335535  | 0.861288    | -1.16105    |
| Eif4ebp1 | Eif4ebp1-201 | 0.00023968  | 1.51234     | 1.51234     |
| Eif4g1   | Eif4g1-017   | 0.0075984   | 0.771384    | -1.29637    |
| Eif4g2   | Eif4g2-012   | 0.00102133  | 0.23108     | -4.32751    |
| Eif4g2   | Eif4g2-003   | 0.00876473  | 1.98938     | 1.98938     |
| Eif4g3   | Eif4g3-011   | 0.0324609   | 0.340229    | -2.93919    |
| Eif4h    | Eif4h-003    | 0.0140479   | 0.634836    | -1.57521    |
| Eif4h    | Eif4h-004    | 0.0360571   | 0.751626    | -1.33045    |
| Eif5     | Eif5-201     | 0.00962104  | 1.43076     | 1.43076     |
| Eif5a    | Eif5a-012    | 0.0375934   | 1.72511     | 1.72511     |
| Eif5b    | Eif5b-003    | 0.014139    | 2.08223     | 2.08223     |
| Eif6     | Eif6-003     | 0.0173866   | 0.209159    | -4.78106    |
| Elac1    | Elac1-001    | 0.0105034   | 1.45829     | 1.45829     |
| Elavl2   | Elavl2-001   | 0.0300793   | 0.637698    | -1.56814    |
| Elavl2   | Elavl2-014   | 0.0140726   | 1.52996     | 1.52996     |
| Elavl4   | Elavl4-006   | 0.00246635  | 0.508898    | -1.96503    |
| Elf1     | Elf1-201     | 0.0132182   | 0.45419     | -2.20172    |
| Elf2     | Elf2-001     | 0.00293349  | 0.36899     | -2.7101     |
| Elf2     | Elf2-012     | 0.0329178   | 0.466052    | -2.14568    |
| Elk3     | Elk3-001     | 0.000149036 | 0.500036    | -1.99986    |
| Elk4     | Elk4-002     | 0.012596    | 0.841219    | -1.18875    |
| Ell      | Ell-201      | 0.00956333  | 1.33195     | 1.33195     |

|         |             |             |             |          |
|---------|-------------|-------------|-------------|----------|
| Elmod2  | Elmod2-001  | 0.00196373  | 0.683519    | -1.46302 |
| Elovl1  | Elovl1-004  | 0.0368313   | 0.387508    | -2.5806  |
| Elovl4  | Elovl4-001  | 0.010501    | 1.36817     | 1.36817  |
| Elovl5  | Elovl5-001  | 0.00517012  | 0.874634    | -1.14334 |
| Elp2    | Elp2-201    | 0.00960758  | 1.30548     | 1.30548  |
| Elp3    | Elp3-201    | 0.00521239  | 1.25699     | 1.25699  |
| Emb     | Emb-001     | 0.00615824  | 1.18632     | 1.18632  |
| Emc10   | Emc10-002   | 0.0134687   | 0.794686    | -1.25836 |
| Emc10   | Emc10-006   | 0.0112902   | 1.65863     | 1.65863  |
| Emc9    | Emc9-002    | 0.0132307   | 1.55545     | 1.55545  |
| Emc9    | Emc9-003    | 0.0272687   | 1.76531     | 1.76531  |
| Emid1   | Emid1-005   | 0.0272385   | 0.0213723   | -46.7896 |
| Emid1   | Emid1-002   | 0.00527371  | 0.291112    | -3.4351  |
| Emid1   | Emid1-001   | 0.00770428  | 0.570232    | -1.75367 |
| Emilin1 | Emilin1-001 | 0.00754943  | 0.593787    | -1.68411 |
| Emilin3 | Emilin3-001 | 0.0451322   | 3.47586     | 3.47586  |
| Emilin3 | Emilin3-201 | 0.0451322   | 3.47586     | 3.47586  |
| Eml4    | Eml4-202    | 0.0190382   | 1.31699     | 1.31699  |
| Eml4    | Eml4-203    | 0.0257062   | 1.40205     | 1.40205  |
| Eml5    | Eml5-201    | 0.00291538  | 0.858695    | -1.16456 |
| Eml6    | Eml6-001    | 0.0407378   | 1.28237     | 1.28237  |
| Emp1    | Emp1-001    | 0.00866775  | 0.449907    | -2.22268 |
| Emp1    | Emp1-201    | 4.32988e-05 | 0.506838    | -1.97302 |
| Emp3    | Emp3-201    | 0.0246672   | 0.511272    | -1.9559  |
| Emx1    | Emx1-001    | 0.0365887   | 5.00905e-06 | -199639  |
| Enah    | Enah-004    | 0.00320515  | 1.79036     | 1.79036  |
| Enah    | Enah-005    | 0.000683467 | 1.85774     | 1.85774  |
| Enah    | Enah-002    | 3.68106e-05 | 2.34876     | 2.34876  |
| Enc1    | Enc1-201    | 0.00692118  | 0.623391    | -1.60413 |
| Endod1  | Endod1-201  | 0.0381527   | 0.622986    | -1.60517 |
| Endov   | Endov-011   | 0.025914    | 2.23132     | 2.23132  |
| Endov   | Endov-006   | 0.014824    | 6.34532     | 6.34532  |
| Eng     | Eng-005     | 0.0391304   | 0.637132    | -1.56953 |
| Engase  | Engase-007  | 0.00276659  | 0.236148    | -4.23463 |
| Engase  | Engase-005  | 0.00827166  | 1.83254     | 1.83254  |
| Enho    | Enho-001    | 0.0225795   | 1.31638     | 1.31638  |
| Eno3    | Eno3-201    | 0.0182503   | 0.437956    | -2.28334 |
| Enpp1   | Enpp1-001   | 0.000180214 | 0.325244    | -3.07461 |
| Enpp3   | Enpp3-201   | 0.000823786 | 0.432546    | -2.3119  |
| Enpp6   | Enpp6-001   | 0.0395154   | 2.81167     | 2.81167  |
| Enpp6   | Enpp6-003   | 0.0283853   | 4.37377     | 4.37377  |
| Enpp6   | Enpp6-004   | 0.00949155  | 7.33191     | 7.33191  |
| Ensa    | Ensa-001    | 0.0140008   | 1.16492     | 1.16492  |

|          |              |             |             |             |
|----------|--------------|-------------|-------------|-------------|
| Enthd2   | Enthd2-004   | 0.0191136   | 2.00632     | 2.00632     |
| Entpd2   | Entpd2-001   | 0.0168854   | 0.284464    | -3.51538    |
| Entpd6   | Entpd6-003   | 0.030185    | 1.7013      | 1.7013      |
| Entpd6   | Entpd6-001   | 0.00931713  | 1.7233      | 1.7233      |
| Entpd6   | Entpd6-002   | 0.0260031   | 1.88075e+06 | 1.88075e+06 |
| Entpd7   | Entpd7-003   | 0.0145089   | 7.49175     | 7.49175     |
| Epas1    | Epas1-201    | 0.03466     | 1.21238     | 1.21238     |
| Epb41    | Epb41-012    | 0.0291566   | 2.64546     | 2.64546     |
| Epb41l1  | Epb41l1-008  | 0.00371304  | 0.074266    | -13.4651    |
| Epb41l1  | Epb41l1-002  | 0.0273237   | 0.262742    | -3.80602    |
| Epb41l1  | Epb41l1-004  | 0.0233315   | 1.80458     | 1.80458     |
| Epb41l1  | Epb41l1-003  | 0.0114869   | 2.12519     | 2.12519     |
| Epb41l1  | Epb41l1-012  | 0.012516    | 2.22078     | 2.22078     |
| Epb41l1  | Epb41l1-010  | 0.0229967   | 2.99699     | 2.99699     |
| Epb41l5  | Epb41l5-003  | 0.0110565   | 0.885916    | -1.12878    |
| Epc1     | Epc1-001     | 0.0278183   | 0.569237    | -1.75674    |
| Epdr1    | Epdr1-201    | 0.000964545 | 1.39353     | 1.39353     |
| Epg5     | Epg5-201     | 0.00815901  | 1.23251     | 1.23251     |
| Epm2aip1 | Epm2aip1-001 | 0.0466491   | 1.21511     | 1.21511     |
| Epor     | Epor-201     | 0.0197577   | 0.702568    | -1.42335    |
| Eprs     | Eprs-001     | 3.03622e-07 | 1.69855     | 1.69855     |
| Eprs     | Eprs-003     | 0.00546938  | 3.56027     | 3.56027     |
| Eps15    | Eps15-006    | 0.0184994   | 0.581936    | -1.7184     |
| Eps15    | Eps15-001    | 0.0256058   | 0.816194    | -1.2252     |
| Eps15    | Eps15-008    | 0.0389168   | 8.66359     | 8.66359     |
| Eps15    | Eps15-010    | 0.0113995   | 62.3411     | 62.3411     |
| Eps15l1  | Eps15l1-201  | 0.00135027  | 1.19206     | 1.19206     |
| Ept1     | Ept1-001     | 0.0011123   | 0.665232    | -1.50323    |
| Ept1     | Ept1-005     | 0.0375163   | 1.83891     | 1.83891     |
| Erb2ip   | Erb2ip-001   | 0.00349467  | 0.476217    | -2.09988    |
| Erb2ip   | Erb2ip-002   | 0.00864254  | 0.644065    | -1.55264    |
| Erb3     | Erb3-001     | 0.0136803   | 1.74714     | 1.74714     |
| Erc2     | Erc2-201     | 0.00100867  | 1.25974     | 1.25974     |
| Erc4     | Erc4-005     | 0.0285268   | 0.596061    | -1.67768    |
| Erc4     | Erc4-004     | 0.00830476  | 0.694407    | -1.44008    |
| Erc5     | Erc5-004     | 0.0207434   | 0.0294447   | -33.962     |
| Erc6     | Erc6-201     | 0.00349922  | 1.22413     | 1.22413     |
| Erc6l2   | Erc6l2-003   | 0.0483102   | 1.60827     | 1.60827     |
| Ergic3   | Ergic3-008   | 0.0258979   | 8.9183e-05  | -11212.9    |
| Ergic3   | Ergic3-001   | 0.000441829 | 0.70426     | -1.41993    |
| Eri3     | Eri3-005     | 0.00836338  | 1.62282     | 1.62282     |
| Erlin1   | Erlin1-001   | 0.00701625  | 1.73046     | 1.73046     |
| Erlin1   | Erlin1-201   | 0.00602358  | 2.11145     | 2.11145     |

|         |             |             |             |          |
|---------|-------------|-------------|-------------|----------|
| Ermap   | Ermap-002   | 0.0235795   | 1.16444     | 1.16444  |
| Ermap   | Ermap-003   | 0.0235802   | 1.16444     | 1.16444  |
| Ermp1   | Ermp1-002   | 0.00382922  | 1.14669     | 1.14669  |
| Ermp1   | Ermp1-003   | 0.00598756  | 1.48808     | 1.48808  |
| Ern1    | Ern1-001    | 0.0448274   | 1.13495     | 1.13495  |
| Ern1    | Ern1-003    | 0.00756559  | 3.99072     | 3.99072  |
| Ero1lb  | Ero1lb-201  | 0.027666    | 1.3281      | 1.3281   |
| Erp29   | Erp29-001   | 0.01079     | 0.654281    | -1.5284  |
| Esco1   | Esco1-001   | 0.00721702  | 1.3366      | 1.3366   |
| Esco1   | Esco1-003   | 0.0289961   | 3.55729     | 3.55729  |
| Esd     | Esd-006     | 0.0292131   | 0.663414    | -1.50735 |
| Esd     | Esd-009     | 0.0135189   | 1.41708     | 1.41708  |
| Esr1    | Esr1-003    | 0.00728745  | 3.0798      | 3.0798   |
| Esx1    | Esx1-003    | 0.00941591  | 2.25446e-05 | -44356.4 |
| Esyt1   | Esyt1-201   | 0.00276554  | 0.703523    | -1.42142 |
| Etfa    | Etfa-001    | 0.04997     | 1.08607     | 1.08607  |
| Etfdh   | Etfdh-004   | 0.00967937  | 0.459898    | -2.1744  |
| Ethe1   | Ethe1-001   | 0.00395165  | 1.36325     | 1.36325  |
| Ets1    | Ets1-001    | 0.00787575  | 0.689471    | -1.45039 |
| Etv3    | Etv3-201    | 0.0263744   | 1.33128     | 1.33128  |
| Etv4    | Etv4-001    | 0.0131294   | 0.408261    | -2.44941 |
| Etv4    | Etv4-007    | 0.039296    | 0.692885    | -1.44324 |
| Etv5    | Etv5-001    | 0.000996748 | 1.25111     | 1.25111  |
| Etv6    | Etv6-005    | 0.0480895   | 84.9919     | 84.9919  |
| Etv6    | Etv6-004    | 0.0235759   | 865.596     | 865.596  |
| Eva1b   | Eva1b-003   | 0.0403254   | 0.225615    | -4.43232 |
| Eva1c   | Eva1c-001   | 0.0290291   | 0.630564    | -1.58588 |
| Evi2a   | Evi2a-004   | 0.00849924  | 0.185429    | -5.39289 |
| Evi5    | Evi5-001    | 0.000251521 | 0.872796    | -1.14574 |
| Exd1    | Exd1-001    | 0.0174322   | 1.54717     | 1.54717  |
| Exoc2   | Exoc2-201   | 0.00197114  | 1.12128     | 1.12128  |
| Exoc3   | Exoc3-201   | 0.0267701   | 1.18943     | 1.18943  |
| Exoc4   | Exoc4-004   | 0.00325759  | 1.45172     | 1.45172  |
| Exoc4   | Exoc4-002   | 0.0454195   | 2.763       | 2.763    |
| Exoc5   | Exoc5-001   | 0.00482787  | 0.596964    | -1.67514 |
| Exoc5   | Exoc5-003   | 0.0411575   | 0.751832    | -1.33009 |
| Exoc6   | Exoc6-201   | 0.00166116  | 1.24119     | 1.24119  |
| Exoc6b  | Exoc6b-001  | 0.0332985   | 1.17141     | 1.17141  |
| Exoc7   | Exoc7-003   | 0.0153742   | 0.388128    | -2.57647 |
| Exosc10 | Exosc10-004 | 0.0204396   | 1.71726     | 1.71726  |
| Exosc2  | Exosc2-002  | 0.0106056   | 2.4587      | 2.4587   |
| Exosc2  | Exosc2-003  | 0.00628087  | 5.13827     | 5.13827  |
| Exosc3  | Exosc3-003  | 0.0270835   | 0.141762    | -7.05406 |

|               |                   |             |            |          |
|---------------|-------------------|-------------|------------|----------|
| Exosc7        | Exosc7-003        | 0.0136052   | 1.9336     | 1.9336   |
| Exosc8        | Exosc8-003        | 0.0160024   | 1.48407    | 1.48407  |
| Ext1          | Ext1-002          | 0.0138422   | 0.574368   | -1.74104 |
| Ext1          | Ext1-004          | 0.00127238  | 0.682592   | -1.465   |
| Ext1          | Ext1-001          | 0.000448768 | 0.700096   | -1.42837 |
| Ext2          | Ext2-001          | 0.0013337   | 1.2817     | 1.2817   |
| Ext2          | Ext2-005          | 0.00017249  | 13.586     | 13.586   |
| Extl1         | Extl1-001         | 0.000359738 | 2.10227    | 2.10227  |
| Extl2         | Extl2-006         | 9.89638e-05 | 0.841919   | -1.18776 |
| Extl3         | Extl3-201         | 0.0037682   | 0.747992   | -1.33691 |
| Eya1          | Eya1-002          | 0.0456971   | 0.00730462 | -136.9   |
| Eya3          | Eya3-001          | 0.00176664  | 0.81047    | -1.23385 |
| Eya3          | Eya3-002          | 0.0489796   | 1.95255    | 1.95255  |
| Eya3          | Eya3-004          | 0.0025029   | 2.60617    | 2.60617  |
| Eya3          | Eya3-003          | 0.00644356  | 7.63994    | 7.63994  |
| F2r           | F2r-201           | 7.80012e-05 | 0.554918   | -1.80207 |
| F2rl2         | F2rl2-001         | 0.0357935   | 0.789888   | -1.266   |
| F730035M05Rik | F730035M05Rik-001 | 0.0473975   | 1.42544    | 1.42544  |
| F830112A20Rik | F830112A20Rik-001 | 0.000209333 | 0.141563   | -7.064   |
| Fa2h          | Fa2h-003          | 0.0344726   | 16.0984    | 16.0984  |
| Faah          | Faah-005          | 0.0385181   | 1.93353    | 1.93353  |
| Faah          | Faah-004          | 0.0442858   | 3.42158    | 3.42158  |
| Fads3         | Fads3-201         | 0.012966    | 0.841289   | -1.18865 |
| Faf2          | Faf2-006          | 6.86537e-05 | 1.76297    | 1.76297  |
| Fahd1         | Fahd1-201         | 0.0314091   | 1.30607    | 1.30607  |
| Faim2         | Faim2-201         | 0.0294241   | 1.37085    | 1.37085  |
| Fam114a2      | Fam114a2-003      | 0.0191896   | 5.86879    | 5.86879  |
| Fam117b       | Fam117b-001       | 0.0485441   | 0.811771   | -1.23187 |
| Fam118a       | Fam118a-201       | 0.0283286   | 1.17232    | 1.17232  |
| Fam118b       | Fam118b-003       | 0.0129618   | 1.95263    | 1.95263  |
| Fam120a       | Fam120a-201       | 0.0255002   | 0.813557   | -1.22917 |
| Fam122b       | Fam122b-002       | 0.0247145   | 0.54409    | -1.83793 |
| Fam122b       | Fam122b-001       | 0.00669719  | 0.569786   | -1.75505 |
| Fam124a       | Fam124a-001       | 0.0110696   | 1.20318    | 1.20318  |
| Fam126b       | Fam126b-009       | 0.0051182   | 3.11903    | 3.11903  |
| Fam129b       | Fam129b-001       | 0.00105532  | 0.686623   | -1.4564  |
| Fam132a       | Fam132a-003       | 0.00205655  | 5.48546    | 5.48546  |
| Fam133b       | Fam133b-002       | 0.0329677   | 1.21032    | 1.21032  |
| Fam134b       | Fam134b-201       | 0.0497256   | 1.29597    | 1.29597  |
| Fam135a       | Fam135a-002       | 0.0396061   | 1.75154    | 1.75154  |
| Fam135a       | Fam135a-005       | 0.0122127   | 4.18661    | 4.18661  |
| Fam135b       | Fam135b-201       | 0.0301894   | 1.69367    | 1.69367  |
| Fam136a       | Fam136a-003       | 0.0452954   | 4.32813    | 4.32813  |



|          |              |             |             |          |
|----------|--------------|-------------|-------------|----------|
| Fam149a  | Fam149a-003  | 0.000918389 | 1.53536     | 1.53536  |
| Fam149b  | Fam149b-202  | 0.0282125   | 3.21939     | 3.21939  |
| Fam155a  | Fam155a-201  | 0.0295241   | 0.533203    | -1.87546 |
| Fam160a2 | Fam160a2-004 | 0.0215528   | 0.551993    | -1.81162 |
| Fam160b2 | Fam160b2-201 | 0.0273521   | 0.782477    | -1.27799 |
| Fam161a  | Fam161a-004  | 0.0262246   | 2.77786     | 2.77786  |
| Fam161b  | Fam161b-001  | 0.023169    | 1.70731     | 1.70731  |
| Fam168b  | Fam168b-003  | 0.00938209  | 2.58815     | 2.58815  |
| Fam171a1 | Fam171a1-004 | 0.00606902  | 0.403238    | -2.47993 |
| Fam171a1 | Fam171a1-001 | 0.00151447  | 0.506336    | -1.97497 |
| Fam171a2 | Fam171a2-001 | 0.0401233   | 0.725491    | -1.37838 |
| Fam171b  | Fam171b-001  | 9.6271e-05  | 1.48145     | 1.48145  |
| Fam173b  | Fam173b-003  | 0.00712524  | 1.21954     | 1.21954  |
| Fam173b  | Fam173b-001  | 0.033399    | 1.39078     | 1.39078  |
| Fam175a  | Fam175a-007  | 0.0470905   | 1.57925     | 1.57925  |
| Fam175a  | Fam175a-201  | 0.0019464   | 2.01251     | 2.01251  |
| Fam175a  | Fam175a-006  | 0.0110706   | 2.31        | 2.31     |
| Fam175a  | Fam175a-004  | 0.00659993  | 3.22934     | 3.22934  |
| Fam185a  | Fam185a-001  | 0.00246735  | 0.663189    | -1.50787 |
| Fam186b  | Fam186b-201  | 3.35896e-05 | 7.49003     | 7.49003  |
| Fam188a  | Fam188a-003  | 0.0139521   | 0.575171    | -1.73861 |
| Fam188a  | Fam188a-015  | 0.00180276  | 1.90378     | 1.90378  |
| Fam192a  | Fam192a-201  | 0.0238271   | 1.21973     | 1.21973  |
| Fam195b  | Fam195b-001  | 0.000720862 | 1.36607     | 1.36607  |
| Fam196b  | Fam196b-202  | 0.00522113  | 4.59478     | 4.59478  |
| Fam199x  | Fam199x-001  | 0.00193495  | 1.14324     | 1.14324  |
| Fam19a1  | Fam19a1-001  | 0.0457628   | 0.293222    | -3.41038 |
| Fam19a4  | Fam19a4-001  | 0.0197438   | 0.258569    | -3.86745 |
| Fam204a  | Fam204a-201  | 0.000712283 | 1.55681     | 1.55681  |
| Fam20b   | Fam20b-004   | 0.0187018   | 0.510103    | -1.96039 |
| Fam212a  | Fam212a-001  | 0.0382074   | 0.558024    | -1.79204 |
| Fam217b  | Fam217b-001  | 0.0362749   | 0.836983    | -1.19477 |
| Fam220a  | Fam220a-201  | 0.0171726   | 1.29057     | 1.29057  |
| Fam220a  | Fam220a-001  | 0.01716     | 1.29062     | 1.29062  |
| Fam220a  | Fam220a-004  | 0.01716     | 1.29062     | 1.29062  |
| Fam227a  | Fam227a-202  | 0.00887712  | 1.43911     | 1.43911  |
| Fam228b  | Fam228b-201  | 0.00487757  | 1.80816     | 1.80816  |
| Fam229b  | Fam229b-007  | 0.0310071   | 5.72521     | 5.72521  |
| Fam229b  | Fam229b-008  | 0.0310073   | 5.72522     | 5.72522  |
| Fam234a  | Fam234a-002  | 0.00698121  | 0.752       | -1.32979 |
| Fam234a  | Fam234a-001  | 0.00384503  | 0.768917    | -1.30053 |
| Fam234b  | Fam234b-002  | 0.0169939   | 1.11081e-05 | -90024.3 |
| Fam234b  | Fam234b-001  | 0.000543907 | 1.37734     | 1.37734  |

|         |             |             |            |          |
|---------|-------------|-------------|------------|----------|
| Fam3c   | Fam3c-001   | 0.000775038 | 0.421853   | -2.3705  |
| Fam3c   | Fam3c-003   | 0.0220492   | 2.29091    | 2.29091  |
| Fam3c   | Fam3c-006   | 0.0280129   | 26.2756    | 26.2756  |
| Fam46a  | Fam46a-002  | 0.000282374 | 0.703169   | -1.42213 |
| Fam46b  | Fam46b-001  | 0.0116774   | 3.67702    | 3.67702  |
| Fam49b  | Fam49b-201  | 0.0223456   | 0.591465   | -1.69072 |
| Fam50a  | Fam50a-001  | 0.00305036  | 1.25154    | 1.25154  |
| Fam53a  | Fam53a-006  | 0.0124283   | 0.759186   | -1.3172  |
| Fam53b  | Fam53b-003  | 0.00325629  | 7.99582    | 7.99582  |
| Fam53b  | Fam53b-007  | 0.00289506  | 10.8283    | 10.8283  |
| Fam53c  | Fam53c-202  | 0.0012628   | 1.24731    | 1.24731  |
| Fam57b  | Fam57b-004  | 0.00198301  | 0.672102   | -1.48787 |
| Fam58b  | Fam58b-001  | 0.0449699   | 1.5118     | 1.5118   |
| Fam60a  | Fam60a-006  | 0.0196038   | 2.19619    | 2.19619  |
| Fam60a  | Fam60a-005  | 0.0110057   | 4.70421    | 4.70421  |
| Fam63a  | Fam63a-201  | 0.010327    | 0.57247    | -1.74682 |
| Fam69b  | Fam69b-002  | 0.0268927   | 1.3624     | 1.3624   |
| Fam71e1 | Fam71e1-004 | 0.0250198   | 2.72353    | 2.72353  |
| Fam73a  | Fam73a-001  | 0.0271893   | 0.619768   | -1.61351 |
| Fam76b  | Fam76b-001  | 0.0181693   | 0.671389   | -1.48945 |
| Fam78b  | Fam78b-002  | 0.000722295 | 0.463996   | -2.15519 |
| Fam98b  | Fam98b-001  | 0.0100684   | 1.62471    | 1.62471  |
| Fam98b  | Fam98b-002  | 0.00136095  | 2.52576    | 2.52576  |
| Fam98c  | Fam98c-002  | 0.0437174   | 2.86667    | 2.86667  |
| Fanca   | Fanca-009   | 0.0478395   | 0.00200906 | -497.746 |
| Fanfb   | Fanfb-001   | 0.0304496   | 1.91843    | 1.91843  |
| Fanfd2  | Fanfd2-007  | 0.0253331   | 1.37709    | 1.37709  |
| Fance   | Fance-014   | 0.0442749   | 3.98677    | 3.98677  |
| Fancl   | Fancl-001   | 0.0124729   | 1.46032    | 1.46032  |
| Fancl   | Fancl-002   | 0.0329461   | 2.07274    | 2.07274  |
| Far1    | Far1-001    | 0.0120053   | 0.660606   | -1.51376 |
| Far1    | Far1-005    | 0.00164541  | 8.62879    | 8.62879  |
| Farp1   | Farp1-004   | 0.0287165   | 0.669249   | -1.49421 |
| Farp1   | Farp1-001   | 0.00389763  | 0.762309   | -1.3118  |
| Farp2   | Farp2-001   | 0.0124857   | 2.31999    | 2.31999  |
| Farsb   | Farsb-001   | 0.00603085  | 1.46409    | 1.46409  |
| Fas     | Fas-201     | 0.0481833   | 0.555679   | -1.7996  |
| Fastk   | Fastk-013   | 0.00661198  | 2.29802    | 2.29802  |
| Fastk   | Fastk-001   | 0.000140744 | 2.70961    | 2.70961  |
| Fat2    | Fat2-001    | 0.0480531   | 5.64582    | 5.64582  |
| Fat2    | Fat2-201    | 0.0480531   | 5.64582    | 5.64582  |
| Fau     | Fau-203     | 0.00698974  | 1.96698    | 1.96698  |
| Faxc    | Faxc-001    | 0.0229086   | 1.88003    | 1.88003  |

|          |              |             |          |          |
|----------|--------------|-------------|----------|----------|
| Fbf1     | Fbf1-011     | 0.0141711   | 0.21101  | -4.73912 |
| Fbf1     | Fbf1-201     | 0.00214787  | 0.641627 | -1.55854 |
| Fbf1     | Fbf1-012     | 0.0103292   | 0.677525 | -1.47596 |
| Fblim1   | Fblim1-001   | 0.0101236   | 0.365611 | -2.73515 |
| Fblim1   | Fblim1-201   | 0.0401304   | 0.485446 | -2.05996 |
| Fbln1    | Fbln1-002    | 0.000685971 | 0.574562 | -1.74046 |
| Fbln1    | Fbln1-001    | 0.00574734  | 0.765845 | -1.30575 |
| Fbln2    | Fbln2-003    | 0.0123456   | 0.578613 | -1.72827 |
| Fbln2    | Fbln2-001    | 0.0323339   | 0.700633 | -1.42728 |
| Fbrs     | Fbrs-008     | 0.019072    | 1.64515  | 1.64515  |
| Fbrs     | Fbrs-005     | 0.036481    | 3.16658  | 3.16658  |
| Fbrsl1   | Fbrsl1-201   | 0.0491749   | 0.767229 | -1.30339 |
| Fbxl12os | Fbxl12os-002 | 0.00550958  | 0.227037 | -4.40456 |
| Fbxl17   | Fbxl17-005   | 0.0206555   | 0.279218 | -3.58143 |
| Fbxl18   | Fbxl18-201   | 0.0340313   | 50.8854  | 50.8854  |
| Fbxl19   | Fbxl19-006   | 0.0137933   | 0.732564 | -1.36507 |
| Fbxl19   | Fbxl19-003   | 0.0220558   | 0.748339 | -1.33629 |
| Fbxl5    | Fbxl5-003    | 0.0185936   | 0.581595 | -1.71941 |
| Fbxo10   | Fbxo10-001   | 0.042057    | 1.20332  | 1.20332  |
| Fbxo16   | Fbxo16-201   | 0.0205178   | 1.71083  | 1.71083  |
| Fbxo17   | Fbxo17-001   | 0.0140711   | 2.33332  | 2.33332  |
| Fbxo18   | Fbxo18-010   | 0.0435521   | 0.570894 | -1.75164 |
| Fbxo18   | Fbxo18-001   | 0.0174959   | 1.10334  | 1.10334  |
| Fbxo2    | Fbxo2-001    | 0.0375372   | 0.660818 | -1.51328 |
| Fbxo21   | Fbxo21-004   | 0.0397668   | 1.43904  | 1.43904  |
| Fbxo22   | Fbxo22-001   | 0.0321936   | 1.71353  | 1.71353  |
| Fbxo24   | Fbxo24-002   | 0.0406608   | 0.345214 | -2.89675 |
| Fbxo28   | Fbxo28-001   | 0.00157796  | 0.573753 | -1.74291 |
| Fbxo36   | Fbxo36-001   | 0.00181342  | 1.83599  | 1.83599  |
| Fbxo47   | Fbxo47-001   | 0.0158175   | 1.45938  | 1.45938  |
| Fbxo6    | Fbxo6-007    | 0.00534264  | 0.405096 | -2.46855 |
| Fbxo7    | Fbxo7-006    | 0.0128859   | 8.16984  | 8.16984  |
| Fbxo8    | Fbxo8-001    | 0.00213324  | 1.21865  | 1.21865  |
| Fbxo9    | Fbxo9-007    | 0.0161825   | 2.5615   | 2.5615   |
| Fbxw11   | Fbxw11-004   | 0.0132052   | 0.136857 | -7.30691 |
| Fbxw11   | Fbxw11-201   | 0.0448021   | 0.673154 | -1.48555 |
| Fbxw11   | Fbxw11-001   | 0.0111026   | 0.787627 | -1.26964 |
| Fbxw5    | Fbxw5-001    | 0.0204067   | 0.848394 | -1.1787  |
| Fbxw5    | Fbxw5-006    | 0.0302592   | 1.68044  | 1.68044  |
| Fcho1    | Fcho1-009    | 0.0263807   | 1.84049  | 1.84049  |
| Fcor     | Fcor-001     | 0.0274877   | 2.45226  | 2.45226  |
| Fem1b    | Fem1b-201    | 0.0397469   | 0.858271 | -1.16513 |
| Fermt3   | Fermt3-201   | 0.00701389  | 0.570201 | -1.75377 |

|        |            |             |             |          |
|--------|------------|-------------|-------------|----------|
| Fes    | Fes-006    | 0.0360358   | 0.6913      | -1.44655 |
| Ffar4  | Ffar4-201  | 0.0394611   | 1.48763     | 1.48763  |
| Fgd2   | Fgd2-004   | 0.00558151  | 0.353767    | -2.82672 |
| Fgd2   | Fgd2-001   | 0.0073858   | 0.462822    | -2.16066 |
| Fgd3   | Fgd3-003   | 0.0427886   | 1.57383     | 1.57383  |
| Fgd4   | Fgd4-001   | 0.0355039   | 1.3411      | 1.3411   |
| Fgd6   | Fgd6-001   | 0.0160007   | 0.736206    | -1.35831 |
| Fgf13  | Fgf13-001  | 0.0099305   | 0.359723    | -2.77992 |
| Fgf2os | Fgf2os-001 | 0.0462829   | 1.78489     | 1.78489  |
| Fgf7   | Fgf7-003   | 0.0103377   | 0.000394542 | -2534.58 |
| Fgfr1  | Fgfr1-010  | 0.00894022  | 0.393266    | -2.54281 |
| Fgfr1  | Fgfr1-003  | 0.0149522   | 0.627485    | -1.59366 |
| Fgfrl1 | Fgfrl1-001 | 0.0141946   | 0.388527    | -2.57382 |
| Fgl1   | Fgl1-001   | 0.00089249  | 0.234636    | -4.26193 |
| Fhl3   | Fhl3-001   | 0.000128472 | 0.627355    | -1.59399 |
| Fhod1  | Fhod1-001  | 0.0150451   | 0.620324    | -1.61206 |
| Ficd   | Ficd-001   | 0.0131458   | 1.29236     | 1.29236  |
| Fign   | Fign-002   | 0.00350773  | 1.64817     | 1.64817  |
| Figl2  | Figl2-201  | 0.00668295  | 0.795877    | -1.25648 |
| Filip1 | Filip1-002 | 0.00869544  | 2.14513     | 2.14513  |
| Fip1l1 | Fip1l1-003 | 0.000107615 | 0.481985    | -2.07475 |
| Fip1l1 | Fip1l1-004 | 0.00251203  | 1.5306      | 1.5306   |
| Fip1l1 | Fip1l1-005 | 0.0331512   | 2.00638     | 2.00638  |
| Fis1   | Fis1-001   | 0.0402746   | 0.782304    | -1.27828 |
| Fis1   | Fis1-003   | 0.0335068   | 2.4489      | 2.4489   |
| Fkbp10 | Fkbp10-001 | 0.044012    | 0.593227    | -1.6857  |
| Fkbp1a | Fkbp1a-010 | 0.0209268   | 0.510654    | -1.95827 |
| Fkbp2  | Fkbp2-201  | 0.00703987  | 0.638203    | -1.5669  |
| Fkbp2  | Fkbp2-202  | 0.0305757   | 0.709577    | -1.40929 |
| Fkbp7  | Fkbp7-001  | 0.0125345   | 0.710287    | -1.40788 |
| Fkbp8  | Fkbp8-010  | 0.00164194  | 0.630412    | -1.58626 |
| Fkbp9  | Fkbp9-001  | 0.0232066   | 1.09207     | 1.09207  |
| Fktn   | Fktn-001   | 0.00826158  | 0.632201    | -1.58177 |
| Flcn   | Flcn-005   | 0.0130072   | 1.40781     | 1.40781  |
| Flcn   | Flcn-004   | 0.00328413  | 1.73185     | 1.73185  |
| Flii   | Flii-001   | 0.0297894   | 0.886479    | -1.12806 |
| Flii   | Flii-003   | 0.0317735   | 2.94043     | 2.94043  |
| Flna   | Flna-002   | 0.0285217   | 0.574028    | -1.74208 |
| Flna   | Flna-006   | 0.0400265   | 0.58508     | -1.70917 |
| Flna   | Flna-001   | 0.0136232   | 0.614271    | -1.62794 |
| Flna   | Flna-003   | 0.0404701   | 0.630194    | -1.58681 |
| Flna   | Flna-201   | 0.0159594   | 0.645211    | -1.54988 |
| Flna   | Flna-011   | 0.0490784   | 0.735041    | -1.36047 |

|          |              |             |           |          |
|----------|--------------|-------------|-----------|----------|
| Flnb     | Flnb-001     | 0.00507053  | 0.68226   | -1.46572 |
| Flrt1    | Flrt1-201    | 0.00149602  | 1.46091   | 1.46091  |
| Fmn1     | Fmn1-201     | 0.000392404 | 0.361793  | -2.76401 |
| Fmnl1    | Fmnl1-001    | 0.00076397  | 0.504498  | -1.98217 |
| Fmnl2    | Fmnl2-004    | 0.0487463   | 0.564907  | -1.7702  |
| Fmnl2    | Fmnl2-001    | 0.00172051  | 0.606307  | -1.64933 |
| Fmnl2    | Fmnl2-002    | 0.0452711   | 0.810254  | -1.23418 |
| Fmr1     | Fmr1-008     | 0.00853376  | 0.60766   | -1.64566 |
| Fn1      | Fn1-018      | 0.000575258 | 0.107624  | -9.29163 |
| Fn1      | Fn1-012      | 0.024156    | 0.192654  | -5.19064 |
| Fn1      | Fn1-011      | 0.00519818  | 0.252449  | -3.9612  |
| Fn1      | Fn1-017      | 0.00177871  | 0.32671   | -3.06082 |
| Fn1      | Fn1-008      | 0.0014516   | 0.345928  | -2.89078 |
| Fn1      | Fn1-007      | 3.68475e-05 | 0.352257  | -2.83884 |
| Fn1      | Fn1-003      | 7.40566e-06 | 0.382942  | -2.61136 |
| Fn1      | Fn1-001      | 0.00137602  | 0.454002  | -2.20263 |
| Fn1      | Fn1-005      | 0.000910918 | 0.492065  | -2.03225 |
| Fn1      | Fn1-002      | 0.0151491   | 0.493686  | -2.02558 |
| Fn1      | Fn1-006      | 0.0114078   | 0.493862  | -2.02486 |
| Fn3krp   | Fn3krp-001   | 0.0231434   | 1.28958   | 1.28958  |
| Fnbp1    | Fnbp1-201    | 0.0420344   | 0.0188901 | -52.9379 |
| Fnbp1    | Fnbp1-015    | 0.000648647 | 0.0829622 | -12.0537 |
| Fnbp1    | Fnbp1-001    | 0.000714327 | 0.127738  | -7.82851 |
| Fnbp1    | Fnbp1-003    | 0.0236988   | 0.68744   | -1.45467 |
| Fnbp1l   | Fnbp1l-005   | 0.0323187   | 0.844468  | -1.18418 |
| Fndc3b   | Fndc3b-001   | 0.0263009   | 1.20306   | 1.20306  |
| Fnip2    | Fnip2-001    | 0.0318982   | 1.15238   | 1.15238  |
| Fntb     | Fntb-001     | 0.00988598  | 1.26944   | 1.26944  |
| Fntb     | Fntb-002     | 0.0274552   | 10.9068   | 10.9068  |
| Folr1    | Folr1-014    | 0.0336313   | 0.239613  | -4.1734  |
| Fos      | Fos-002      | 0.0388652   | 32.0911   | 32.0911  |
| Fosb     | Fosb-201     | 0.0232391   | 2.11032   | 2.11032  |
| Foxj1    | Foxj1-001    | 0.0168626   | 0.645889  | -1.54825 |
| Foxj2    | Foxj2-001    | 0.00780956  | 1.31519   | 1.31519  |
| Foxk1    | Foxk1-001    | 0.0366947   | 0.90413   | -1.10604 |
| Foxk2    | Foxk2-001    | 0.0100579   | 0.858634  | -1.16464 |
| Foxn3    | Foxn3-001    | 0.0201423   | 0.521463  | -1.91768 |
| Foxp1    | Foxp1-032    | 0.00484521  | 1.84944   | 1.84944  |
| Foxp4    | Foxp4-006    | 0.0301394   | 1.80817   | 1.80817  |
| Foxred2  | Foxred2-001  | 0.00214887  | 1.38493   | 1.38493  |
| Foxs1    | Foxs1-001    | 0.0101382   | 0.179574  | -5.56875 |
| Fpgs     | Fpgs-006     | 0.007495    | 2.70555   | 2.70555  |
| Fra10ac1 | Fra10ac1-201 | 0.0277419   | 1.35961   | 1.35961  |

|        |            |             |          |          |
|--------|------------|-------------|----------|----------|
| Frmd4a | Frmd4a-007 | 0.00560968  | 0.58746  | -1.70224 |
| Frmd4a | Frmd4a-011 | 0.000570916 | 2.30783  | 2.30783  |
| Frmd4a | Frmd4a-012 | 0.0327539   | 3.24972  | 3.24972  |
| Frrs1  | Frrs1-005  | 0.028978    | 1.85405  | 1.85405  |
| Fry    | Fry-004    | 0.000615193 | 30.2474  | 30.2474  |
| Fryl   | Fryl-009   | 0.0293405   | 0.275402 | -3.63106 |
| Fryl   | Fryl-001   | 0.0132395   | 0.823884 | -1.21376 |
| Fsbp   | Fsbp-001   | 0.0180888   | 0.61104  | -1.63655 |
| Fscn1  | Fscn1-001  | 0.0370512   | 0.680793 | -1.46887 |
| Fscn1  | Fscn1-002  | 0.0312782   | 0.727779 | -1.37404 |
| Fscn2  | Fscn2-001  | 0.0172518   | 1.81186  | 1.81186  |
| Fsd1l  | Fsd1l-201  | 0.0480108   | 0.773475 | -1.29287 |
| Fsd2   | Fsd2-001   | 0.00193936  | 2.77006  | 2.77006  |
| Fst    | Fst-201    | 0.0316608   | 0.585614 | -1.70761 |
| Fstl1  | Fstl1-005  | 0.00109304  | 0.039299 | -25.446  |
| Fstl1  | Fstl1-001  | 0.0471573   | 0.691342 | -1.44646 |
| Fstl4  | Fstl4-001  | 0.0223845   | 1.94526  | 1.94526  |
| Fth1   | Fth1-201   | 0.00714294  | 0.853884 | -1.17112 |
| Ftl1   | Ftl1-002   | 0.00705409  | 1.27118  | 1.27118  |
| Ftl1   | Ftl1-003   | 0.0297385   | 1.65118  | 1.65118  |
| Fto    | Fto-001    | 0.00772849  | 1.17491  | 1.17491  |
| Ftx    | Ftx-001    | 0.00929862  | 1.22831  | 1.22831  |
| Fubp1  | Fubp1-001  | 0.00354601  | 0.745017 | -1.34225 |
| Fubp1  | Fubp1-005  | 0.00728679  | 1.69774  | 1.69774  |
| Fubp1  | Fubp1-002  | 0.0437055   | 1.70063  | 1.70063  |
| Fubp1  | Fubp1-016  | 0.0274261   | 4.40586  | 4.40586  |
| Fubp3  | Fubp3-001  | 0.00329333  | 1.29572  | 1.29572  |
| Fuca1  | Fuca1-002  | 0.0237162   | 0.343615 | -2.91023 |
| Fuca1  | Fuca1-003  | 0.0244522   | 0.53463  | -1.87045 |
| Fuca1  | Fuca1-001  | 1.92273e-06 | 0.608171 | -1.64427 |
| Fuca2  | Fuca2-002  | 0.00202457  | 1.25212  | 1.25212  |
| Fundc1 | Fundc1-001 | 0.010844    | 1.28096  | 1.28096  |
| Fundc2 | Fundc2-003 | 0.0471186   | 1.42079  | 1.42079  |
| Fuom   | Fuom-002   | 0.0440359   | 1.62145  | 1.62145  |
| Fuom   | Fuom-013   | 0.0493215   | 2.49925  | 2.49925  |
| Furin  | Furin-201  | 0.000605206 | 0.515986 | -1.93804 |
| Fus    | Fus-012    | 0.0223446   | 0.549009 | -1.82146 |
| Fus    | Fus-015    | 0.0177186   | 0.624221 | -1.602   |
| Fuz    | Fuz-201    | 0.00556141  | 0.692116 | -1.44484 |
| Fxn    | Fxn-002    | 0.0234888   | 0.409045 | -2.44472 |
| Fxr1   | Fxr1-001   | 0.001403    | 0.579467 | -1.72572 |
| Fxr1   | Fxr1-005   | 0.00984318  | 1.40173  | 1.40173  |
| Fyco1  | Fyco1-201  | 0.0182344   | 1.39233  | 1.39233  |

|               |                   |             |           |          |
|---------------|-------------------|-------------|-----------|----------|
| Fyttd1        | Fyttd1-009        | 0.0066123   | 1.57938   | 1.57938  |
| Fzd4          | Fzd4-201          | 0.00667213  | 1.36598   | 1.36598  |
| Fzd7          | Fzd7-001          | 0.00109714  | 0.59228   | -1.68839 |
| Fzr1          | Fzr1-002          | 0.00466598  | 1.28877   | 1.28877  |
| G0s2          | G0s2-001          | 0.0195336   | 4.57458   | 4.57458  |
| G2e3          | G2e3-001          | 0.0144738   | 0.780777  | -1.28077 |
| G2e3          | G2e3-002          | 0.0437211   | 1.66569   | 1.66569  |
| G2e3          | G2e3-003          | 0.0356283   | 3.1703    | 3.1703   |
| G3bp1         | G3bp1-002         | 0.00530862  | 1.51115   | 1.51115  |
| G3bp2         | G3bp2-201         | 0.00237916  | 0.475096  | -2.10484 |
| G3bp2         | G3bp2-001         | 0.0218881   | 0.754085  | -1.32611 |
| G3bp2         | G3bp2-003         | 0.0241439   | 1.7795    | 1.7795   |
| G430095P16Rik | G430095P16Rik-001 | 0.000176531 | 2.46814   | 2.46814  |
| G630016G05Rik | G630016G05Rik-001 | 0.0482797   | 2.41239   | 2.41239  |
| G6pdx         | G6pdx-004         | 0.0341928   | 1.67284   | 1.67284  |
| Gabarapl1     | Gabarapl1-004     | 0.00583228  | 32.962    | 32.962   |
| Gabbr1        | Gabbr1-002        | 0.0196472   | 0.631915  | -1.58249 |
| Gabpa         | Gabpa-001         | 0.000966116 | 0.84326   | -1.18587 |
| Gabpa         | Gabpa-002         | 0.0207057   | 1.48573   | 1.48573  |
| Gabpa         | Gabpa-004         | 0.0297641   | 18.4688   | 18.4688  |
| Gabrb3        | Gabrb3-006        | 0.0224691   | 0.336748  | -2.96958 |
| Gabrb3        | Gabrb3-001        | 0.00859552  | 0.591783  | -1.68981 |
| Gabre         | Gabre-003         | 0.00034924  | 3.29138   | 3.29138  |
| Gadd45g       | Gadd45g-002       | 0.00389205  | 0.287255  | -3.48122 |
| Gak           | Gak-001           | 0.00095141  | 1.38524   | 1.38524  |
| Gak           | Gak-002           | 0.00228169  | 1.73267   | 1.73267  |
| Gak           | Gak-009           | 0.0414695   | 2.32321   | 2.32321  |
| Gak           | Gak-004           | 0.0134333   | 2.53228   | 2.53228  |
| Galc          | Galc-201          | 0.0204569   | 1.21921   | 1.21921  |
| Galk2         | Galk2-004         | 0.0298743   | 2591.05   | 2591.05  |
| Galns         | Galns-201         | 0.0493261   | 0.766451  | -1.30472 |
| Galnt1        | Galnt1-201        | 0.000155148 | 0.634377  | -1.57635 |
| Galnt1        | Galnt1-001        | 0.0280501   | 0.667224  | -1.49875 |
| Galnt11       | Galnt11-004       | 0.0393239   | 1.84586   | 1.84586  |
| Galnt15       | Galnt15-001       | 0.0326697   | 0.254512  | -3.92909 |
| Galnt3        | Galnt3-004        | 0.0430144   | 1.985     | 1.985    |
| Galnt3        | Galnt3-003        | 0.0280842   | 2.43426   | 2.43426  |
| Gamt          | Gamt-001          | 0.0121809   | 0.544994  | -1.83488 |
| Gapdh         | Gapdh-013         | 0.0402132   | 0.0805854 | -12.4092 |
| Garem         | Garem-201         | 0.0250735   | 0.840374  | -1.18995 |
| Garnl3        | Garnl3-011        | 0.0433868   | 0.662512  | -1.50941 |
| Garnl3        | Garnl3-008        | 0.0305934   | 0.727429  | -1.37471 |
| Gars          | Gars-001          | 3.7732e-07  | 1.54298   | 1.54298  |

|         |             |             |           |          |
|---------|-------------|-------------|-----------|----------|
| Gas5    | Gas5-011    | 0.0252555   | 0.143494  | -6.96893 |
| Gata2   | Gata2-004   | 0.0130181   | 3.52606   | 3.52606  |
| Gata3   | Gata3-001   | 0.0124175   | 1.66022   | 1.66022  |
| Gata4   | Gata4-005   | 0.0151086   | 0.230679  | -4.33502 |
| Gata4   | Gata4-004   | 0.0151092   | 0.230681  | -4.335   |
| Gata4   | Gata4-002   | 0.034053    | 1.36594   | 1.36594  |
| Gatad2b | Gatad2b-201 | 0.00136777  | 3.80764   | 3.80764  |
| Gatc    | Gatc-001    | 0.0380947   | 1.30843   | 1.30843  |
| Gba2    | Gba2-001    | 0.0160276   | 0.699816  | -1.42895 |
| Gbe1    | Gbe1-201    | 0.0072049   | 0.215234  | -4.64611 |
| Gbe1    | Gbe1-203    | 0.03051     | 3.84653   | 3.84653  |
| Gbf1    | Gbf1-002    | 0.0144344   | 1.36277   | 1.36277  |
| Gcat    | Gcat-201    | 0.0181247   | 1.41882   | 1.41882  |
| Gcfc2   | Gcfc2-004   | 0.0270992   | 1.77351   | 1.77351  |
| Gck     | Gck-004     | 0.0264413   | 6.80776   | 6.80776  |
| Gck     | Gck-001     | 0.0264413   | 6.80776   | 6.80776  |
| Gclc    | Gclc-001    | 0.000189979 | 1.47143   | 1.47143  |
| Gclm    | Gclm-002    | 0.00727231  | 1.31663   | 1.31663  |
| Gclm    | Gclm-201    | 0.00333364  | 1.55865   | 1.55865  |
| Gcnt7   | Gcnt7-002   | 0.0346789   | 0.130821  | -7.64403 |
| Gdap1   | Gdap1-003   | 0.0136781   | 0.0758092 | -13.191  |
| Gdap2   | Gdap2-004   | 0.031608    | 2.23417   | 2.23417  |
| Gdnf    | Gdnf-201    | 0.036574    | 2.10019   | 2.10019  |
| Gdpd3   | Gdpd3-003   | 0.0250668   | 0.07856   | -12.7291 |
| Gdpd5   | Gdpd5-201   | 0.0093225   | 0.560291  | -1.78479 |
| Gem     | Gem-001     | 0.0147362   | 0.62421   | -1.60203 |
| Gemin2  | Gemin2-003  | 0.0302258   | 0.491676  | -2.03386 |
| Gemin2  | Gemin2-001  | 0.000386358 | 1.57341   | 1.57341  |
| Gemin5  | Gemin5-001  | 0.049978    | 1.5484    | 1.5484   |
| Gemin7  | Gemin7-001  | 0.00844224  | 0.201506  | -4.96264 |
| Get4    | Get4-002    | 0.00223634  | 1.3967    | 1.3967   |
| Gfm2    | Gfm2-008    | 0.0297574   | 0.728786  | -1.37214 |
| Gfpt1   | Gfpt1-001   | 0.0102053   | 1.13238   | 1.13238  |
| Gfpt1   | Gfpt1-002   | 0.00254934  | 4.9334    | 4.9334   |
| Gfra2   | Gfra2-201   | 0.00689474  | 0.600762  | -1.66455 |
| Gfra4   | Gfra4-007   | 0.0496471   | 0.111342  | -8.98135 |
| Gfra4   | Gfra4-008   | 0.0461751   | 2.87298   | 2.87298  |
| Gga2    | Gga2-004    | 0.000266472 | 1.39727   | 1.39727  |
| Gga2    | Gga2-003    | 0.0325986   | 1.41057   | 1.41057  |
| Ggact   | Ggact-001   | 0.00118169  | 1.74833   | 1.74833  |
| Ggct    | Ggct-003    | 0.0218397   | 2.36725   | 2.36725  |
| Ggct    | Ggct-005    | 0.0113692   | 4.09669   | 4.09669  |
| Ggcx    | Ggcx-001    | 0.00152765  | 1.53323   | 1.53323  |



|         |             |             |           |          |
|---------|-------------|-------------|-----------|----------|
| Ggn     | Ggn-202     | 0.0195382   | 1.61882   | 1.61882  |
| Ggps1   | Ggps1-201   | 0.0112484   | 1.15643   | 1.15643  |
| Ggt7    | Ggt7-004    | 0.0183808   | 0.339845  | -2.94251 |
| Ggt7    | Ggt7-001    | 0.0112203   | 0.811998  | -1.23153 |
| Ghitm   | Ghitm-201   | 0.0315069   | 1.60141   | 1.60141  |
| Gigyf2  | Gigyf2-006  | 0.0442914   | 1.79226   | 1.79226  |
| Gin1    | Gin1-004    | 0.048422    | 1.67785   | 1.67785  |
| Ginm1   | Ginm1-001   | 0.00668763  | 1.30876   | 1.30876  |
| Gins1   | Gins1-004   | 0.0157053   | 2.25143   | 2.25143  |
| Git1    | Git1-001    | 0.0226709   | 0.792853  | -1.26127 |
| Gja8    | Gja8-001    | 0.0332549   | 6.66145   | 6.66145  |
| Gjd2    | Gjd2-001    | 0.000447444 | 3.83319   | 3.83319  |
| Gk5     | Gk5-001     | 0.00103963  | 1.68718   | 1.68718  |
| Glb1    | Glb1-201    | 0.000600394 | 0.764238  | -1.30849 |
| Glb1l   | Glb1l-006   | 0.00919613  | 7.24353   | 7.24353  |
| Glcci1  | Glcci1-012  | 0.00398062  | 0.675934  | -1.47943 |
| Glce    | Glce-001    | 0.0327801   | 1.67412   | 1.67412  |
| Gldc    | Gldc-201    | 0.00746744  | 0.784163  | -1.27524 |
| Glg1    | Glg1-001    | 0.00724787  | 0.859242  | -1.16382 |
| Glis2   | Glis2-001   | 0.00169179  | 0.401497  | -2.49068 |
| Glmp    | Glmp-003    | 7.27806e-05 | 0.39633   | -2.52315 |
| Glmp    | Glmp-009    | 0.0173679   | 0.435186  | -2.29787 |
| Glmp    | Glmp-001    | 0.0105975   | 0.469567  | -2.12962 |
| Glmp    | Glmp-010    | 0.0245059   | 0.483192  | -2.06957 |
| Glo1    | Glo1-201    | 0.00877397  | 1.30443   | 1.30443  |
| Glo1    | Glo1-202    | 0.00411434  | 1.57138   | 1.57138  |
| Glod4   | Glod4-001   | 0.00369878  | 1.44469   | 1.44469  |
| Gls     | Gls-011     | 0.0233236   | 0.78323   | -1.27676 |
| Gls     | Gls-002     | 0.00183859  | 1.37498   | 1.37498  |
| Glt8d2  | Glt8d2-007  | 0.0445773   | 0.0194214 | -51.4897 |
| Glt8d2  | Glt8d2-001  | 0.0422753   | 2.31018   | 2.31018  |
| Glud1   | Glud1-001   | 0.0125179   | 0.732755  | -1.36471 |
| Glul    | Glul-001    | 0.0052508   | 0.743262  | -1.34542 |
| Glyctk  | Glyctk-001  | 0.0135139   | 2.50776   | 2.50776  |
| Gm10109 | Gm10109-001 | 0.00203598  | 9.98105   | 9.98105  |
| Gm10222 | Gm10222-001 | 0.018313    | 0.851279  | -1.1747  |
| Gm10244 | Gm10244-001 | 0.00389163  | 3.3322    | 3.3322   |
| Gm10277 | Gm10277-001 | 0.000335506 | 0.319592  | -3.12899 |
| Gm10376 | Gm10376-201 | 0.0340855   | 0.0277093 | -36.089  |
| Gm10409 | Gm10409-001 | 0.00501253  | 1.29638   | 1.29638  |
| Gm10439 | Gm10439-001 | 1.4751e-05  | 0.75146   | -1.33074 |
| Gm10459 | Gm10459-001 | 0.0377188   | 0.51602   | -1.93791 |
| Gm10545 | Gm10545-001 | 0.0486336   | 2.34682   | 2.34682  |

|         |             |             |             |             |
|---------|-------------|-------------|-------------|-------------|
| Gm10548 | Gm10548-001 | 0.0425926   | 2.78579     | 2.78579     |
| Gm10557 | Gm10557-201 | 0.00028124  | 1.53199     | 1.53199     |
| Gm10662 | Gm10662-001 | 0.0117343   | 2.34698     | 2.34698     |
| Gm10699 | Gm10699-201 | 0.0393649   | 1.93987     | 1.93987     |
| Gm10709 | Gm10709-201 | 0.000718329 | 1.84182     | 1.84182     |
| Gm10785 | Gm10785-001 | 0.0324475   | 1.37654     | 1.37654     |
| Gm10800 | Gm10800-201 | 0.0196143   | 2.69465     | 2.69465     |
| Gm10925 | Gm10925-001 | 0.0396392   | 0.884782    | -1.13022    |
| Gm11209 | Gm11209-001 | 0.0351117   | 0.194513    | -5.14104    |
| Gm11400 | Gm11400-001 | 0.0310664   | 1.21934     | 1.21934     |
| Gm1141  | Gm1141-002  | 0.0415278   | 3.20082e+07 | 3.20082e+07 |
| Gm11410 | Gm11410-001 | 0.0198389   | 0.598007    | -1.67222    |
| Gm11454 | Gm11454-001 | 0.00184765  | 3.26286     | 3.26286     |
| Gm11457 | Gm11457-003 | 0.0389093   | 0.376268    | -2.65768    |
| Gm11491 | Gm11491-001 | 0.0457391   | 0.344472    | -2.903      |
| Gm11510 | Gm11510-001 | 0.0498375   | 0.327284    | -3.05545    |
| Gm11525 | Gm11525-001 | 0.027548    | 1.36446     | 1.36446     |
| Gm11638 | Gm11638-001 | 0.00907547  | 2.64928     | 2.64928     |
| Gm11736 | Gm11736-001 | 0.0241782   | 2.9928      | 2.9928      |
| Gm11739 | Gm11739-001 | 0.00345424  | 0.372996    | -2.681      |
| Gm11744 | Gm11744-202 | 0.0352872   | 2.82671e-05 | -35376.8    |
| Gm11748 | Gm11748-001 | 0.00473786  | 3.0957      | 3.0957      |
| Gm11766 | Gm11766-001 | 0.0423613   | 1.58731     | 1.58731     |
| Gm11772 | Gm11772-001 | 0.0164066   | 2.44804     | 2.44804     |
| Gm12060 | Gm12060-001 | 0.0367376   | 2.99598     | 2.99598     |
| Gm12196 | Gm12196-001 | 0.00970798  | 21.3832     | 21.3832     |
| Gm12258 | Gm12258-001 | 0.0027656   | 2.19395     | 2.19395     |
| Gm12404 | Gm12404-001 | 0.01017     | 0.707944    | -1.41254    |
| Gm12454 | Gm12454-001 | 0.0337127   | 2.57563     | 2.57563     |
| Gm12743 | Gm12743-001 | 0.0178606   | 2.00914     | 2.00914     |
| Gm12762 | Gm12762-001 | 0.00324383  | 1.56145     | 1.56145     |
| Gm12784 | Gm12784-001 | 0.0015486   | 2.41354     | 2.41354     |
| Gm12847 | Gm12847-001 | 0.00101378  | 20.6775     | 20.6775     |
| Gm12932 | Gm12932-001 | 0.00234892  | 3.48123     | 3.48123     |
| Gm12940 | Gm12940-004 | 0.0190445   | 0.664964    | -1.50384    |
| Gm12940 | Gm12940-002 | 0.0167414   | 0.706213    | -1.416      |
| Gm13033 | Gm13033-001 | 0.00788625  | 2.29708     | 2.29708     |
| Gm13071 | Gm13071-001 | 0.0329241   | 0.51942     | -1.92522    |
| Gm13111 | Gm13111-001 | 3.53011e-07 | 0.360142    | -2.77668    |
| Gm13117 | Gm13117-001 | 0.000503891 | 8.16158     | 8.16158     |
| Gm13154 | Gm13154-001 | 0.0141162   | 0.744178    | -1.34376    |
| Gm13214 | Gm13214-001 | 0.00247867  | 6.02507     | 6.02507     |
| Gm13230 | Gm13230-001 | 0.00558392  | 0.574952    | -1.73928    |

|         |             |             |          |          |
|---------|-------------|-------------|----------|----------|
| Gm13270 | Gm13270-001 | 0.0109251   | 13.5961  | 13.5961  |
| Gm13341 | Gm13341-001 | 0.0446862   | 0.709807 | -1.40883 |
| Gm13370 | Gm13370-001 | 0.0455933   | 0.046615 | -21.4523 |
| Gm13421 | Gm13421-002 | 0.00384841  | 2.2359   | 2.2359   |
| Gm13528 | Gm13528-001 | 0.00519003  | 4.04774  | 4.04774  |
| Gm13544 | Gm13544-001 | 0.00773104  | 1.32412  | 1.32412  |
| Gm13647 | Gm13647-001 | 0.00154592  | 1.62598  | 1.62598  |
| Gm13663 | Gm13663-001 | 0.0112877   | 1.80308  | 1.80308  |
| Gm13716 | Gm13716-001 | 0.000161501 | 2.50532  | 2.50532  |
| Gm13830 | Gm13830-005 | 0.0322395   | 1.90136  | 1.90136  |
| Gm13832 | Gm13832-001 | 0.0436267   | 4.27112  | 4.27112  |
| Gm13844 | Gm13844-001 | 0.0235984   | 2.91242  | 2.91242  |
| Gm13848 | Gm13848-001 | 0.0111153   | 1.75684  | 1.75684  |
| Gm14042 | Gm14042-001 | 0.000267662 | 2.65807  | 2.65807  |
| Gm14165 | Gm14165-001 | 0.000266069 | 6.81659  | 6.81659  |
| Gm14236 | Gm14236-001 | 0.0204245   | 7.54337  | 7.54337  |
| Gm14321 | Gm14321-002 | 0.000438559 | 2.23662  | 2.23662  |
| Gm14391 | Gm14391-004 | 0.0489259   | 1.58951  | 1.58951  |
| Gm14399 | Gm14399-001 | 0.0321512   | 3.92239  | 3.92239  |
| Gm14472 | Gm14472-001 | 0.00748722  | 0.1607   | -6.22279 |
| Gm14480 | Gm14480-001 | 0.0381692   | 12.3596  | 12.3596  |
| Gm14540 | Gm14540-001 | 0.0382316   | 0.169666 | -5.89395 |
| Gm14634 | Gm14634-001 | 0.0154484   | 3.45331  | 3.45331  |
| Gm14963 | Gm14963-001 | 0.012441    | 1.82727  | 1.82727  |
| Gm14966 | Gm14966-002 | 0.0471062   | 2.0979   | 2.0979   |
| Gm15091 | Gm15091-001 | 0.0254646   | 0.736642 | -1.35751 |
| Gm15097 | Gm15097-201 | 0.0292847   | 0.590707 | -1.69289 |
| Gm15107 | Gm15107-001 | 0.0164587   | 0.838058 | -1.19324 |
| Gm15286 | Gm15286-001 | 0.0124285   | 1.93232  | 1.93232  |
| Gm15440 | Gm15440-001 | 0.0104215   | 0.355089 | -2.81619 |
| Gm15443 | Gm15443-001 | 0.0410888   | 1.79427  | 1.79427  |
| Gm15446 | Gm15446-002 | 0.00489616  | 1.42485  | 1.42485  |
| Gm15446 | Gm15446-201 | 0.0452423   | 1.99961  | 1.99961  |
| Gm15487 | Gm15487-001 | 0.0377804   | 0.269017 | -3.71723 |
| Gm15510 | Gm15510-002 | 0.00993722  | 3.49849  | 3.49849  |
| Gm15533 | Gm15533-002 | 0.00728619  | 2.43658  | 2.43658  |
| Gm15535 | Gm15535-002 | 0.0151627   | 5.38264  | 5.38264  |
| Gm15545 | Gm15545-001 | 0.00944005  | 1.66448  | 1.66448  |
| Gm15545 | Gm15545-004 | 0.0376342   | 2.23391  | 2.23391  |
| Gm15592 | Gm15592-001 | 0.0328768   | 0.31522  | -3.17239 |
| Gm15651 | Gm15651-001 | 0.0235523   | 3.62081  | 3.62081  |
| Gm15788 | Gm15788-001 | 0.0235073   | 3.30234  | 3.30234  |
| Gm15800 | Gm15800-001 | 0.0109403   | 0.896109 | -1.11594 |

|         |             |             |          |          |
|---------|-------------|-------------|----------|----------|
| Gm15816 | Gm15816-001 | 0.0366611   | 2.43158  | 2.43158  |
| Gm15832 | Gm15832-001 | 0.00402236  | 0.741687 | -1.34828 |
| Gm15834 | Gm15834-002 | 0.00465783  | 1.86712  | 1.86712  |
| Gm15847 | Gm15847-001 | 0.00337071  | 3.40012  | 3.40012  |
| Gm15850 | Gm15850-001 | 0.00185396  | 16.8378  | 16.8378  |
| Gm15880 | Gm15880-001 | 0.0472664   | 2.83488  | 2.83488  |
| Gm15898 | Gm15898-001 | 0.0428303   | 0.428615 | -2.3331  |
| Gm15927 | Gm15927-004 | 0.0189832   | 2.93638  | 2.93638  |
| Gm15929 | Gm15929-001 | 0.00532244  | 11.5921  | 11.5921  |
| Gm15934 | Gm15934-001 | 0.00102055  | 6.4772   | 6.4772   |
| Gm16008 | Gm16008-001 | 0.0190235   | 2.21144  | 2.21144  |
| Gm16091 | Gm16091-001 | 0.0294317   | 0.668961 | -1.49485 |
| Gm16133 | Gm16133-002 | 0.0383977   | 5.03248  | 5.03248  |
| Gm16153 | Gm16153-001 | 0.0233447   | 1.26162  | 1.26162  |
| Gm16181 | Gm16181-001 | 0.0326733   | 0.510503 | -1.95885 |
| Gm16188 | Gm16188-001 | 0.00643793  | 3.14422  | 3.14422  |
| Gm16193 | Gm16193-001 | 0.0451584   | 3.61851  | 3.61851  |
| Gm16327 | Gm16327-001 | 0.00729166  | 2.34445  | 2.34445  |
| Gm16334 | Gm16334-001 | 0.00385955  | 3.48874  | 3.48874  |
| Gm16365 | Gm16365-004 | 0.0499455   | 2.8756   | 2.8756   |
| Gm16386 | Gm16386-201 | 0.0165035   | 1.65847  | 1.65847  |
| Gm16487 | Gm16487-201 | 0.0277379   | 0.329693 | -3.03313 |
| Gm16536 | Gm16536-001 | 0.0179974   | 0.858917 | -1.16426 |
| Gm16552 | Gm16552-001 | 0.00190841  | 6.17926  | 6.17926  |
| Gm16575 | Gm16575-001 | 0.0388093   | 2.10344  | 2.10344  |
| Gm16617 | Gm16617-201 | 0.0197827   | 0.509561 | -1.96247 |
| Gm16701 | Gm16701-001 | 0.00627084  | 1.43252  | 1.43252  |
| Gm16712 | Gm16712-201 | 0.00950247  | 1.3959   | 1.3959   |
| Gm16907 | Gm16907-201 | 0.0174619   | 0.606939 | -1.64761 |
| Gm17029 | Gm17029-001 | 0.0105748   | 1.68926  | 1.68926  |
| Gm17034 | Gm17034-001 | 0.0147977   | 2.25917  | 2.25917  |
| Gm17146 | Gm17146-001 | 0.0245307   | 0.211907 | -4.71904 |
| Gm17195 | Gm17195-001 | 0.0123971   | 0.601856 | -1.66153 |
| Gm17210 | Gm17210-001 | 0.010929    | 0.350441 | -2.85355 |
| Gm17249 | Gm17249-201 | 0.00805795  | 1.81238  | 1.81238  |
| Gm17250 | Gm17250-201 | 0.000521787 | 1.82324  | 1.82324  |
| Gm17296 | Gm17296-201 | 0.0265983   | 1.36663  | 1.36663  |
| Gm17396 | Gm17396-001 | 0.0252546   | 1.56576  | 1.56576  |
| Gm17484 | Gm17484-201 | 0.00715061  | 1.73345  | 1.73345  |
| Gm17491 | Gm17491-201 | 0.00501608  | 1.30771  | 1.30771  |
| Gm17552 | Gm17552-201 | 0.034507    | 1.91518  | 1.91518  |
| Gm17586 | Gm17586-201 | 0.0232608   | 2.0769   | 2.0769   |
| Gm17733 | Gm17733-001 | 0.00628243  | 1.97613  | 1.97613  |

|         |             |             |             |          |
|---------|-------------|-------------|-------------|----------|
| Gm1947  | Gm1947-001  | 0.00321351  | 0.492819    | -2.02914 |
| Gm19744 | Gm19744-005 | 0.0324953   | 0.000141151 | -7084.62 |
| Gm19744 | Gm19744-001 | 0.00480703  | 1.71189     | 1.71189  |
| Gm19744 | Gm19744-004 | 0.0115569   | 1.75175     | 1.75175  |
| Gm19744 | Gm19744-003 | 0.0101843   | 5.28366     | 5.28366  |
| Gm20421 | Gm20421-001 | 0.000399206 | 15.9601     | 15.9601  |
| Gm20457 | Gm20457-001 | 0.0171367   | 1.71939     | 1.71939  |
| Gm20470 | Gm20470-001 | 0.0489315   | 3.11464     | 3.11464  |
| Gm20496 | Gm20496-002 | 0.0462947   | 0.248622    | -4.02216 |
| Gm20498 | Gm20498-003 | 0.0334837   | 1.36038     | 1.36038  |
| Gm20507 | Gm20507-001 | 0.0405313   | 1.98822     | 1.98822  |
| Gm20517 | Gm20517-001 | 0.0228046   | 3.21169     | 3.21169  |
| Gm20541 | Gm20541-001 | 0.0295412   | 1.45518     | 1.45518  |
| Gm20559 | Gm20559-001 | 0.036735    | 1.63109     | 1.63109  |
| Gm20627 | Gm20627-002 | 0.00287997  | 2.66803     | 2.66803  |
| Gm20628 | Gm20628-001 | 0.00214623  | 3.85005     | 3.85005  |
| Gm20634 | Gm20634-001 | 6.19798e-05 | 6.96883     | 6.96883  |
| Gm20667 | Gm20667-001 | 0.00148256  | 0.420107    | -2.38035 |
| Gm20684 | Gm20684-001 | 0.0135872   | 2.03288     | 2.03288  |
| Gm20695 | Gm20695-002 | 0.042146    | 12.1947     | 12.1947  |
| Gm20715 | Gm20715-001 | 0.0275665   | 4.29908     | 4.29908  |
| Gm20939 | Gm20939-201 | 0.00532803  | 1.50752     | 1.50752  |
| Gm21750 | Gm21750-201 | 0.0317612   | 0.393145    | -2.54359 |
| Gm21769 | Gm21769-201 | 0.028705    | 1.32738     | 1.32738  |
| Gm21781 | Gm21781-001 | 0.000558296 | 1.73931     | 1.73931  |
| Gm21814 | Gm21814-002 | 0.0113312   | 10.2795     | 10.2795  |
| Gm21817 | Gm21817-001 | 0.0166926   | 0.729602    | -1.37061 |
| Gm21887 | Gm21887-202 | 0.0363352   | 0.537358    | -1.86096 |
| Gm22270 | Gm22270-201 | 0.0181154   | 0.630014    | -1.58727 |
| Gm22455 | Gm22455-201 | 0.00290842  | 2.78964     | 2.78964  |
| Gm22613 | Gm22613-201 | 0.0179613   | 0.214702    | -4.65761 |
| Gm22711 | Gm22711-201 | 0.00206699  | 5.69789     | 5.69789  |
| Gm23130 | Gm23130-201 | 0.0307424   | 0.422329    | -2.36782 |
| Gm23442 | Gm23442-201 | 0.00524697  | 8.60455     | 8.60455  |
| Gm23455 | Gm23455-201 | 0.0305498   | 0.584208    | -1.71172 |
| Gm24157 | Gm24157-201 | 0.00392438  | 1.46848     | 1.46848  |
| Gm26529 | Gm26529-201 | 0.0428479   | 2.4405      | 2.4405   |
| Gm26549 | Gm26549-201 | 0.0408287   | 1.91106     | 1.91106  |
| Gm26563 | Gm26563-201 | 0.00123844  | 0.407362    | -2.45482 |
| Gm26564 | Gm26564-201 | 0.03143     | 3.43778     | 3.43778  |
| Gm26615 | Gm26615-201 | 0.0233082   | 2.23755     | 2.23755  |
| Gm26664 | Gm26664-201 | 0.0459051   | 2.52118     | 2.52118  |
| Gm26696 | Gm26696-001 | 0.0056708   | 10.1434     | 10.1434  |

|         |             |             |            |            |
|---------|-------------|-------------|------------|------------|
| Gm26703 | Gm26703-001 | 0.0116613   | 8.47628    | 8.47628    |
| Gm26706 | Gm26706-201 | 0.00512515  | 7.72948    | 7.72948    |
| Gm26744 | Gm26744-201 | 0.0327644   | 5.43632    | 5.43632    |
| Gm26753 | Gm26753-201 | 0.000503891 | 8.16158    | 8.16158    |
| Gm26782 | Gm26782-202 | 0.0281143   | 2.77312    | 2.77312    |
| Gm26788 | Gm26788-002 | 0.00112339  | 2.39042    | 2.39042    |
| Gm26793 | Gm26793-201 | 0.00876164  | 2.36347    | 2.36347    |
| Gm26812 | Gm26812-001 | 0.000219009 | 4.42341    | 4.42341    |
| Gm26824 | Gm26824-201 | 0.00741384  | 0.574437   | -1.74083   |
| Gm26839 | Gm26839-201 | 0.0108992   | 2.29731    | 2.29731    |
| Gm26848 | Gm26848-201 | 0.0248878   | 1.50631    | 1.50631    |
| Gm26868 | Gm26868-201 | 0.00167462  | 1.6956     | 1.6956     |
| Gm26885 | Gm26885-201 | 0.0360138   | 1.34049    | 1.34049    |
| Gm26886 | Gm26886-001 | 0.0108813   | 1.18223    | 1.18223    |
| Gm26888 | Gm26888-201 | 0.000531611 | 2.07923    | 2.07923    |
| Gm26947 | Gm26947-001 | 0.0324319   | 1.60787    | 1.60787    |
| Gm27029 | Gm27029-001 | 0.0332457   | 0.296727   | -3.3701    |
| Gm27204 | Gm27204-001 | 0.0145611   | 0.523614   | -1.9098    |
| Gm27223 | Gm27223-001 | 0.0240303   | 1.3192e+06 | 1.3192e+06 |
| Gm27517 | Gm27517-201 | 0.0439002   | 6.03395    | 6.03395    |
| Gm28036 | Gm28036-001 | 9.05796e-05 | 1.61322    | 1.61322    |
| Gm28037 | Gm28037-001 | 0.003531    | 2.26527    | 2.26527    |
| Gm28042 | Gm28042-003 | 0.00689486  | 1.61499    | 1.61499    |
| Gm28151 | Gm28151-001 | 0.0317012   | 1.87725    | 1.87725    |
| Gm28285 | Gm28285-006 | 0.00630804  | 2.1564e-06 | -463735    |
| Gm28285 | Gm28285-005 | 0.0019393   | 5.46315    | 5.46315    |
| Gm28370 | Gm28370-001 | 0.00412996  | 1.18509    | 1.18509    |
| Gm28424 | Gm28424-001 | 0.00277888  | 1.84731    | 1.84731    |
| Gm28437 | Gm28437-001 | 0.0037538   | 0.796822   | -1.25499   |
| Gm28439 | Gm28439-001 | 0.00398853  | 0.824177   | -1.21333   |
| Gm28661 | Gm28661-001 | 0.0318891   | 0.827957   | -1.20779   |
| Gm28875 | Gm28875-001 | 0.0175378   | 0.388767   | -2.57224   |
| Gm28876 | Gm28876-001 | 0.00824684  | 3.80311    | 3.80311    |
| Gm28933 | Gm28933-001 | 4.98387e-06 | 0.535251   | -1.86828   |
| Gm29170 | Gm29170-001 | 0.00273246  | 1.56508    | 1.56508    |
| Gm29245 | Gm29245-001 | 0.0477925   | 0.315264   | -3.17194   |
| Gm29595 | Gm29595-002 | 0.0106007   | 2.55347    | 2.55347    |
| Gm29666 | Gm29666-001 | 0.00176033  | 1.70679    | 1.70679    |
| Gm3020  | Gm3020-001  | 0.0130675   | 1.25937    | 1.25937    |
| Gm32496 | Gm32496-001 | 0.0384588   | 11.9559    | 11.9559    |
| Gm33280 | Gm33280-001 | 0.0442032   | 1.30957    | 1.30957    |
| Gm34248 | Gm34248-001 | 0.0327626   | 0.342072   | -2.92336   |
| Gm34882 | Gm34882-001 | 0.0332959   | 9.43246    | 9.43246    |

|         |             |             |          |          |
|---------|-------------|-------------|----------|----------|
| Gm364   | Gm364-001   | 0.00287853  | 0.774872 | -1.29054 |
| Gm3654  | Gm3654-001  | 0.0486113   | 2.59877  | 2.59877  |
| Gm36999 | Gm36999-001 | 0.0233291   | 7.85105  | 7.85105  |
| Gm37060 | Gm37060-001 | 0.0148737   | 0.170575 | -5.86251 |
| Gm37074 | Gm37074-001 | 0.000971092 | 2.34262  | 2.34262  |
| Gm37090 | Gm37090-001 | 0.000266017 | 1.53377  | 1.53377  |
| Gm37110 | Gm37110-001 | 0.02542     | 1.63929  | 1.63929  |
| Gm37120 | Gm37120-001 | 0.0464055   | 3.67669  | 3.67669  |
| Gm3716  | Gm3716-002  | 0.0158247   | 0.580712 | -1.72202 |
| Gm37214 | Gm37214-001 | 0.0378593   | 1.74436  | 1.74436  |
| Gm37264 | Gm37264-001 | 0.0314274   | 1.57619  | 1.57619  |
| Gm37271 | Gm37271-001 | 0.00316658  | 4.66049  | 4.66049  |
| Gm37296 | Gm37296-001 | 0.0116654   | 0.282039 | -3.5456  |
| Gm37305 | Gm37305-001 | 0.00503783  | 1.56787  | 1.56787  |
| Gm37333 | Gm37333-001 | 0.0301469   | 0.366654 | -2.72736 |
| Gm37334 | Gm37334-001 | 0.00175207  | 0.225744 | -4.42979 |
| Gm37354 | Gm37354-001 | 0.0181643   | 2.3214   | 2.3214   |
| Gm37362 | Gm37362-001 | 0.0401034   | 2.38993  | 2.38993  |
| Gm37397 | Gm37397-001 | 0.030736    | 1.81668  | 1.81668  |
| Gm37438 | Gm37438-001 | 0.0454837   | 0.195075 | -5.12622 |
| Gm37446 | Gm37446-001 | 0.00674278  | 1.74054  | 1.74054  |
| Gm37447 | Gm37447-001 | 0.0122697   | 1.79166  | 1.79166  |
| Gm37499 | Gm37499-001 | 0.012074    | 0.395007 | -2.5316  |
| Gm37509 | Gm37509-001 | 0.0168194   | 5.25225  | 5.25225  |
| Gm37537 | Gm37537-001 | 0.045492    | 0.189843 | -5.26752 |
| Gm37567 | Gm37567-001 | 0.0360762   | 1.36154  | 1.36154  |
| Gm37584 | Gm37584-001 | 0.000517293 | 1.82359  | 1.82359  |
| Gm37643 | Gm37643-001 | 0.003358    | 0.193632 | -5.16443 |
| Gm37677 | Gm37677-001 | 0.0180669   | 1.6386   | 1.6386   |
| Gm37716 | Gm37716-001 | 0.00414009  | 3.11965  | 3.11965  |
| Gm37759 | Gm37759-001 | 0.0151901   | 5.78604  | 5.78604  |
| Gm37768 | Gm37768-001 | 0.0191635   | 0.653517 | -1.53018 |
| Gm37800 | Gm37800-002 | 0.0377101   | 3.25797  | 3.25797  |
| Gm37829 | Gm37829-001 | 0.045926    | 1.3715   | 1.3715   |
| Gm37848 | Gm37848-001 | 0.042994    | 0.378913 | -2.63913 |
| Gm37861 | Gm37861-001 | 0.00699604  | 0.387467 | -2.58087 |
| Gm37868 | Gm37868-001 | 0.0462484   | 0.25134  | -3.97867 |
| Gm37874 | Gm37874-001 | 1.51841e-05 | 0.474507 | -2.10745 |
| Gm37894 | Gm37894-001 | 0.0404049   | 1.8058   | 1.8058   |
| Gm37924 | Gm37924-001 | 0.00828509  | 1.80305  | 1.80305  |
| Gm37935 | Gm37935-001 | 0.00824039  | 11.9107  | 11.9107  |
| Gm37949 | Gm37949-001 | 0.0325566   | 2.06411  | 2.06411  |
| Gm37953 | Gm37953-001 | 0.0110836   | 1.52433  | 1.52433  |

|         |             |             |           |          |
|---------|-------------|-------------|-----------|----------|
| Gm37954 | Gm37954-001 | 0.0285285   | 2.2097    | 2.2097   |
| Gm37964 | Gm37964-001 | 0.0306807   | 0.299722  | -3.33643 |
| Gm37968 | Gm37968-001 | 0.0460924   | 0.833867  | -1.19923 |
| Gm38080 | Gm38080-001 | 0.00807795  | 0.110341  | -9.0628  |
| Gm38250 | Gm38250-002 | 0.028632    | 1.90034   | 1.90034  |
| Gm38253 | Gm38253-001 | 0.000357555 | 1.63321   | 1.63321  |
| Gm38293 | Gm38293-001 | 0.0427471   | 2.99265   | 2.99265  |
| Gm3830  | Gm3830-001  | 0.0175247   | 0.703735  | -1.42099 |
| Gm38313 | Gm38313-001 | 0.0417141   | 2.16839   | 2.16839  |
| Gm38329 | Gm38329-001 | 0.0153135   | 3.88846   | 3.88846  |
| Gm38357 | Gm38357-001 | 0.00249255  | 2.09726   | 2.09726  |
| Gm38368 | Gm38368-001 | 0.0441716   | 0.0975293 | -10.2533 |
| Gm38377 | Gm38377-001 | 0.0461261   | 2.63684   | 2.63684  |
| Gm38379 | Gm38379-001 | 0.0452725   | 3.48401   | 3.48401  |
| Gm38394 | Gm38394-001 | 0.0142013   | 0.69869   | -1.43125 |
| Gm38394 | Gm38394-201 | 0.0142013   | 0.69869   | -1.43125 |
| Gm3972  | Gm3972-001  | 0.0187369   | 0.282118  | -3.54462 |
| Gm4076  | Gm4076-201  | 0.0123621   | 0.845699  | -1.18245 |
| Gm42469 | Gm42469-001 | 0.0352913   | 1.42696   | 1.42696  |
| Gm42471 | Gm42471-001 | 0.00348402  | 2.87845   | 2.87845  |
| Gm42477 | Gm42477-001 | 0.0244487   | 15.9779   | 15.9779  |
| Gm42508 | Gm42508-001 | 0.013318    | 0.177149  | -5.64496 |
| Gm42546 | Gm42546-001 | 0.0258991   | 2.19421   | 2.19421  |
| Gm42547 | Gm42547-001 | 0.000471939 | 0.799398  | -1.25094 |
| Gm42553 | Gm42553-001 | 0.00287964  | 3.41494   | 3.41494  |
| Gm42633 | Gm42633-001 | 0.0280559   | 0.35812   | -2.79236 |
| Gm42690 | Gm42690-001 | 0.0172206   | 2.29307   | 2.29307  |
| Gm42778 | Gm42778-001 | 0.0225268   | 0.404319  | -2.47329 |
| Gm42791 | Gm42791-001 | 0.00403158  | 4.86707   | 4.86707  |
| Gm42840 | Gm42840-001 | 0.0214333   | 0.278363  | -3.59243 |
| Gm42841 | Gm42841-001 | 0.0309602   | 5.57568   | 5.57568  |
| Gm4285  | Gm4285-001  | 0.0107469   | 1.80473   | 1.80473  |
| Gm42863 | Gm42863-001 | 0.0347065   | 1.90943   | 1.90943  |
| Gm42876 | Gm42876-001 | 0.00622752  | 3.80935   | 3.80935  |
| Gm42878 | Gm42878-201 | 0.0334244   | 0.204473  | -4.89062 |
| Gm42905 | Gm42905-001 | 0.0475555   | 0.449991  | -2.22227 |
| Gm42910 | Gm42910-001 | 0.00668419  | 0.411235  | -2.4317  |
| Gm42923 | Gm42923-001 | 0.0466529   | 2.1565    | 2.1565   |
| Gm42940 | Gm42940-001 | 0.0142373   | 0.237928  | -4.20295 |
| Gm42950 | Gm42950-001 | 0.00341106  | 0.527809  | -1.89463 |
| Gm42979 | Gm42979-001 | 0.0292677   | 1.40263   | 1.40263  |
| Gm42984 | Gm42984-001 | 0.0470117   | 3.00701   | 3.00701  |
| Gm43042 | Gm43042-001 | 0.00118113  | 2.91113   | 2.91113  |



|         |             |             |           |          |
|---------|-------------|-------------|-----------|----------|
| Gm43080 | Gm43080-001 | 0.000700715 | 1.54702   | 1.54702  |
| Gm43081 | Gm43081-001 | 0.0366697   | 2.41644   | 2.41644  |
| Gm43127 | Gm43127-001 | 0.0160821   | 6.85842   | 6.85842  |
| Gm43128 | Gm43128-001 | 0.00366976  | 0.0757438 | -13.2024 |
| Gm43172 | Gm43172-001 | 0.00305255  | 2.12124   | 2.12124  |
| Gm43267 | Gm43267-001 | 0.00559909  | 2.67816   | 2.67816  |
| Gm43270 | Gm43270-001 | 0.0363567   | 1.80077   | 1.80077  |
| Gm43283 | Gm43283-001 | 0.0248084   | 0.188702  | -5.29936 |
| Gm43289 | Gm43289-001 | 0.0465189   | 0.160512  | -6.23006 |
| Gm43314 | Gm43314-001 | 1.62247e-05 | 4.0822    | 4.0822   |
| Gm43332 | Gm43332-001 | 0.0454696   | 1.99988   | 1.99988  |
| Gm43335 | Gm43335-001 | 0.0116013   | 0.328389  | -3.04517 |
| Gm43336 | Gm43336-001 | 0.0380926   | 0.517147  | -1.93369 |
| Gm43338 | Gm43338-001 | 0.00236231  | 2.09247   | 2.09247  |
| Gm43379 | Gm43379-001 | 0.0133071   | 1.70966   | 1.70966  |
| Gm43417 | Gm43417-001 | 0.0471088   | 0.636411  | -1.57131 |
| Gm43488 | Gm43488-001 | 0.012617    | 2.5376    | 2.5376   |
| Gm43513 | Gm43513-001 | 0.0189265   | 1.76052   | 1.76052  |
| Gm43546 | Gm43546-001 | 0.0255308   | 1.67336   | 1.67336  |
| Gm43571 | Gm43571-001 | 0.0320827   | 0.548394  | -1.82351 |
| Gm43577 | Gm43577-001 | 0.00582519  | 12.3141   | 12.3141  |
| Gm43634 | Gm43634-001 | 0.0493329   | 0.499417  | -2.00233 |
| Gm43667 | Gm43667-001 | 0.0118489   | 2.157     | 2.157    |
| Gm43689 | Gm43689-001 | 0.0185208   | 4.2578    | 4.2578   |
| Gm43742 | Gm43742-001 | 0.0373297   | 0.477377  | -2.09478 |
| Gm43800 | Gm43800-001 | 0.0376216   | 0.330914  | -3.02193 |
| Gm43807 | Gm43807-001 | 0.0494456   | 0.464483  | -2.15293 |
| Gm43823 | Gm43823-001 | 0.00463336  | 2.70078   | 2.70078  |
| Gm43841 | Gm43841-001 | 0.0370602   | 0.54514   | -1.83439 |
| Gm43857 | Gm43857-001 | 0.0112788   | 1.58304   | 1.58304  |
| Gm4419  | Gm4419-201  | 0.0301032   | 3.37641   | 3.37641  |
| Gm4673  | Gm4673-002  | 0.0414768   | 1.80691   | 1.80691  |
| Gm4723  | Gm4723-001  | 0.0302582   | 14.7097   | 14.7097  |
| Gm4889  | Gm4889-201  | 0.00127296  | 0.506682  | -1.97362 |
| Gm4924  | Gm4924-201  | 0.0403317   | 1.23948   | 1.23948  |
| Gm4961  | Gm4961-001  | 0.0130718   | 0.467116  | -2.14079 |
| Gm4980  | Gm4980-001  | 0.00995876  | 0.729637  | -1.37055 |
| Gm5108  | Gm5108-002  | 0.0356996   | 0.0238592 | -41.9126 |
| Gm5108  | Gm5108-003  | 0.0356996   | 0.0238592 | -41.9126 |
| Gm5113  | Gm5113-001  | 0.0342304   | 1.26319   | 1.26319  |
| Gm5466  | Gm5466-001  | 0.000504002 | 8.16395   | 8.16395  |
| Gm5615  | Gm5615-001  | 0.00151038  | 3.67791   | 3.67791  |
| Gm5617  | Gm5617-201  | 0.00261131  | 2.07916   | 2.07916  |

|        |            |            |           |          |
|--------|------------|------------|-----------|----------|
| Gm5891 | Gm5891-001 | 0.0117343  | 2.34698   | 2.34698  |
| Gm5900 | Gm5900-201 | 0.0384289  | 1.74398   | 1.74398  |
| Gm5930 | Gm5930-001 | 0.00968414 | 11.9421   | 11.9421  |
| Gm6166 | Gm6166-201 | 0.00748054 | 0.549576  | -1.81958 |
| Gm6297 | Gm6297-201 | 0.0224516  | 2.41236   | 2.41236  |
| Gm6377 | Gm6377-001 | 0.0329589  | 5.09133   | 5.09133  |
| Gm648  | Gm648-001  | 0.00608932 | 2.83371   | 2.83371  |
| Gm6483 | Gm6483-003 | 0.00210764 | 1.34972   | 1.34972  |
| Gm6483 | Gm6483-005 | 0.0189296  | 1.76508   | 1.76508  |
| Gm6611 | Gm6611-001 | 0.0217591  | 2.52495   | 2.52495  |
| Gm6712 | Gm6712-001 | 0.0497613  | 2.90286   | 2.90286  |
| Gm6890 | Gm6890-001 | 0.036017   | 0.315385  | -3.17073 |
| Gm6934 | Gm6934-001 | 0.0263033  | 15.8215   | 15.8215  |
| Gm7008 | Gm7008-001 | 0.0395878  | 2.21779   | 2.21779  |
| Gm7102 | Gm7102-001 | 0.00262598 | 1.28729   | 1.28729  |
| Gm7160 | Gm7160-002 | 0.00716916 | 1.47259   | 1.47259  |
| Gm7393 | Gm7393-001 | 0.0199292  | 0.173815  | -5.75324 |
| Gm7598 | Gm7598-001 | 0.0114174  | 0.19358   | -5.16582 |
| Gm7609 | Gm7609-003 | 0.00875248 | 1.44946   | 1.44946  |
| Gm773  | Gm773-001  | 0.0464669  | 1.31041   | 1.31041  |
| Gm807  | Gm807-201  | 0.00164733 | 0.78069   | -1.28092 |
| Gm8378 | Gm8378-003 | 0.0472541  | 0.0589159 | -16.9733 |
| Gm8580 | Gm8580-001 | 0.00207446 | 1.67422   | 1.67422  |
| Gm8756 | Gm8756-001 | 0.012796   | 2.58028   | 2.58028  |
| Gm8765 | Gm8765-001 | 0.00250896 | 0.548312  | -1.82378 |
| Gm8923 | Gm8923-002 | 0.0414867  | 1.79643   | 1.79643  |
| Gm8923 | Gm8923-004 | 0.024807   | 11.0151   | 11.0151  |
| Gm9095 | Gm9095-001 | 0.0466043  | 0.291114  | -3.43508 |
| Gm9403 | Gm9403-001 | 0.00627127 | 0.267805  | -3.73406 |
| Gm9522 | Gm9522-001 | 0.0221461  | 2.18091   | 2.18091  |
| Gm9710 | Gm9710-001 | 0.00815491 | 2.97759   | 2.97759  |
| Gm9732 | Gm9732-001 | 0.0178994  | 1.31358   | 1.31358  |
| Gm9747 | Gm9747-201 | 0.0276005  | 0.247108  | -4.04682 |
| Gm9754 | Gm9754-001 | 0.025365   | 0.403283  | -2.47965 |
| Gm9776 | Gm9776-201 | 0.00779655 | 1.67473   | 1.67473  |
| Gm9801 | Gm9801-201 | 0.00110274 | 9.15247   | 9.15247  |
| Gm9881 | Gm9881-201 | 0.00701635 | 1.93739   | 1.93739  |
| Gm9888 | Gm9888-001 | 0.0436074  | 2.85209   | 2.85209  |
| Gm9903 | Gm9903-001 | 0.00797841 | 5.52312   | 5.52312  |
| Gm9905 | Gm9905-201 | 0.0128754  | 2.38413   | 2.38413  |
| Gm9929 | Gm9929-001 | 0.0244136  | 1.15411   | 1.15411  |
| Gmcl1  | Gmcl1-001  | 0.00674866 | 1.21858   | 1.21858  |
| Gmeb2  | Gmeb2-001  | 0.00594799 | 1.17084   | 1.17084  |

|         |             |             |           |          |
|---------|-------------|-------------|-----------|----------|
| Gmeb2   | Gmeb2-004   | 0.046986    | 29.8325   | 29.8325  |
| Gmfb    | Gmfb-201    | 0.00577121  | 0.584644  | -1.71044 |
| Gmfb    | Gmfb-001    | 0.0125177   | 0.678735  | -1.47333 |
| Gmip    | Gmip-001    | 0.0135392   | 0.673181  | -1.48548 |
| Gmppb   | Gmppb-002   | 0.0305911   | 0.635712  | -1.57304 |
| Gna12   | Gna12-001   | 0.000131784 | 0.739065  | -1.35306 |
| Gna13   | Gna13-001   | 0.039324    | 0.868516  | -1.15139 |
| Gnai1   | Gnai1-001   | 0.00328634  | 0.553381  | -1.80707 |
| Gnal    | Gnal-202    | 0.0432572   | 0.678254  | -1.47437 |
| Gnas    | Gnas-202    | 0.00776739  | 0.092867  | -10.7681 |
| Gnas    | Gnas-010    | 0.0292615   | 0.142597  | -7.01277 |
| Gnas    | Gnas-007    | 0.0211138   | 0.430856  | -2.32096 |
| Gnas    | Gnas-006    | 0.0385719   | 0.67948   | -1.47171 |
| Gnas    | Gnas-001    | 0.00209626  | 0.706612  | -1.4152  |
| Gnb1    | Gnb1-001    | 0.00223798  | 0.733771  | -1.36282 |
| Gnb1    | Gnb1-007    | 0.0176265   | 1.24508   | 1.24508  |
| Gnb1    | Gnb1-003    | 0.000647886 | 1.77043   | 1.77043  |
| Gnb1l   | Gnb1l-008   | 0.0136913   | 1.57546   | 1.57546  |
| Gnb1l   | Gnb1l-006   | 0.0350255   | 19.2031   | 19.2031  |
| Gnb2    | Gnb2-004    | 0.00178854  | 0.626637  | -1.59582 |
| Gnb2    | Gnb2-014    | 0.0211182   | 0.650298  | -1.53776 |
| Gnb4    | Gnb4-001    | 0.000197835 | 0.584919  | -1.70964 |
| Gnb5    | Gnb5-201    | 0.008935    | 0.617973  | -1.61819 |
| Gne     | Gne-014     | 0.0487619   | 0.0014437 | -692.664 |
| Gne     | Gne-002     | 0.0207805   | 2.00786   | 2.00786  |
| Gng11   | Gng11-001   | 0.0178714   | 0.266588  | -3.75111 |
| Gng2    | Gng2-001    | 0.00395485  | 0.731544  | -1.36697 |
| Gng2    | Gng2-005    | 0.00820324  | 2.0344    | 2.0344   |
| Gnl2    | Gnl2-005    | 0.04336     | 0.474824  | -2.10604 |
| Gnl2    | Gnl2-001    | 0.0239755   | 1.22865   | 1.22865  |
| Gnpat   | Gnpat-001   | 0.00763584  | 1.30551   | 1.30551  |
| Gnpda1  | Gnpda1-001  | 0.0031917   | 1.40431   | 1.40431  |
| Gnpnat1 | Gnpnat1-201 | 0.00193319  | 1.39547   | 1.39547  |
| Gnptab  | Gnptab-004  | 0.0476425   | 3.11043   | 3.11043  |
| Golga1  | Golga1-009  | 0.0339537   | 4.23607   | 4.23607  |
| Golga3  | Golga3-001  | 0.0355605   | 0.827928  | -1.20783 |
| Golga3  | Golga3-002  | 0.00162713  | 1.38919   | 1.38919  |
| Golga3  | Golga3-005  | 0.0192585   | 2.86457   | 2.86457  |
| Golga4  | Golga4-201  | 0.000485099 | 0.844547  | -1.18407 |
| Golga7  | Golga7-004  | 0.0030177   | 2.29341   | 2.29341  |
| Golgb1  | Golgb1-006  | 0.0307639   | 0.37891   | -2.63915 |
| Golgb1  | Golgb1-004  | 0.0326144   | 3.10688   | 3.10688  |
| Gorab   | Gorab-001   | 0.0169549   | 1.33827   | 1.33827  |

|          |              |             |          |          |
|----------|--------------|-------------|----------|----------|
| Gorasp2  | Gorasp2-001  | 0.00143465  | 1.38241  | 1.38241  |
| Gorasp2  | Gorasp2-003  | 0.000729395 | 2.15241  | 2.15241  |
| Gosr1    | Gosr1-001    | 0.0157336   | 1.23077  | 1.23077  |
| Got1     | Got1-001     | 0.0404701   | 1.49719  | 1.49719  |
| Got1     | Got1-002     | 0.0135733   | 2.57624  | 2.57624  |
| Got1     | Got1-003     | 0.00496999  | 3.85141  | 3.85141  |
| Gpaa1    | Gpaa1-007    | 0.043514    | 0.078188 | -12.7897 |
| Gpaa1    | Gpaa1-002    | 0.0462241   | 0.446583 | -2.23922 |
| Gpaa1    | Gpaa1-001    | 0.0116295   | 0.51276  | -1.95023 |
| Gpalpp1  | Gpalpp1-201  | 0.0413304   | 1.32105  | 1.32105  |
| Gpatch11 | Gpatch11-201 | 0.000570889 | 1.45737  | 1.45737  |
| Gpatch2  | Gpatch2-005  | 0.0216379   | 2.35029  | 2.35029  |
| Gpatch2l | Gpatch2l-201 | 0.0457817   | 1.11537  | 1.11537  |
| Gpatch8  | Gpatch8-001  | 0.0161467   | 0.813234 | -1.22966 |
| Gpatch8  | Gpatch8-002  | 0.0156133   | 1.317    | 1.317    |
| Gpc6     | Gpc6-002     | 0.000878373 | 2.16192  | 2.16192  |
| Gpd2     | Gpd2-201     | 0.0325265   | 0.678289 | -1.4743  |
| Gpd2     | Gpd2-202     | 0.0438196   | 0.717576 | -1.39358 |
| Gpi1     | Gpi1-001     | 0.0432805   | 0.882998 | -1.13251 |
| Gpkow    | Gpkow-001    | 0.036894    | 1.32093  | 1.32093  |
| Gpm6b    | Gpm6b-002    | 0.0110956   | 0.251607 | -3.97445 |
| Gpm6b    | Gpm6b-003    | 0.00327183  | 0.310848 | -3.21701 |
| Gpm6b    | Gpm6b-001    | 0.0193936   | 0.407449 | -2.45429 |
| Gpm6b    | Gpm6b-005    | 0.0437685   | 0.846835 | -1.18087 |
| Gpn1     | Gpn1-002     | 0.0297535   | 1.31955  | 1.31955  |
| Gpn1     | Gpn1-007     | 0.0127968   | 1.75727  | 1.75727  |
| Gpr137   | Gpr137-205   | 0.00268195  | 0.552372 | -1.81038 |
| Gpr137c  | Gpr137c-001  | 0.00670545  | 0.534771 | -1.86996 |
| Gpr153   | Gpr153-002   | 0.0217891   | 0.329529 | -3.03464 |
| Gpr19    | Gpr19-010    | 0.00592133  | 0.28003  | -3.57105 |
| Gpr19    | Gpr19-002    | 0.00634421  | 1.492    | 1.492    |
| Gpr35    | Gpr35-004    | 0.0139477   | 0.121827 | -8.20838 |
| Gpr35    | Gpr35-003    | 0.0139508   | 0.12193  | -8.2014  |
| Gpr35    | Gpr35-002    | 0.0139509   | 0.12193  | -8.2014  |
| Gpr4     | Gpr4-001     | 0.0327898   | 2.18003  | 2.18003  |
| Gpr45    | Gpr45-003    | 0.000525037 | 2.25217  | 2.25217  |
| Gpr68    | Gpr68-002    | 0.000128718 | 1.48644  | 1.48644  |
| Gpr68    | Gpr68-201    | 0.004875    | 2.1693   | 2.1693   |
| Gpr75    | Gpr75-001    | 0.0395184   | 0.752118 | -1.32958 |
| Gprasp1  | Gprasp1-002  | 0.0466874   | 1.46674  | 1.46674  |
| Gprasp1  | Gprasp1-004  | 0.00167552  | 1.88497  | 1.88497  |
| Gprc5d   | Gprc5d-001   | 0.0167087   | 0.222613 | -4.4921  |
| Gprc5d   | Gprc5d-002   | 0.0167087   | 0.222613 | -4.4921  |

|          |              |             |             |          |
|----------|--------------|-------------|-------------|----------|
| Gps1     | Gps1-007     | 0.042858    | 0.841513    | -1.18834 |
| Gpsm1    | Gpsm1-004    | 0.0422524   | 0.492532    | -2.03033 |
| Gpsm2    | Gpsm2-001    | 0.0019694   | 1.39962     | 1.39962  |
| Gpt2     | Gpt2-002     | 0.0294679   | 1.31635     | 1.31635  |
| Gpt2     | Gpt2-001     | 0.00180737  | 1.52837     | 1.52837  |
| Gpx4     | Gpx4-001     | 0.0134199   | 0.747033    | -1.33863 |
| Gpx4     | Gpx4-007     | 0.0128587   | 0.805517    | -1.24144 |
| Gpx4     | Gpx4-006     | 0.0284042   | 1.96995     | 1.96995  |
| Gpx7     | Gpx7-001     | 0.000894397 | 2.70429     | 2.70429  |
| Gramd1a  | Gramd1a-201  | 0.0256051   | 0.493127    | -2.02788 |
| Gramd1a  | Gramd1a-004  | 0.0248343   | 0.660678    | -1.5136  |
| Gramd1a  | Gramd1a-003  | 0.00364723  | 0.670416    | -1.49161 |
| Gramd1b  | Gramd1b-010  | 0.0260397   | 1.77533     | 1.77533  |
| Gramd2   | Gramd2-001   | 0.0137391   | 1.47298     | 1.47298  |
| Gramd2   | Gramd2-003   | 0.0176344   | 1.80788     | 1.80788  |
| Gramd3   | Gramd3-201   | 0.00218744  | 1.52023     | 1.52023  |
| Gramd4   | Gramd4-002   | 0.00531676  | 0.587148    | -1.70315 |
| Grap2    | Grap2-201    | 0.0144242   | 0.366287    | -2.7301  |
| Grb14    | Grb14-001    | 0.00593864  | 1.51236     | 1.51236  |
| Grb2     | Grb2-005     | 0.00717534  | 3.62514     | 3.62514  |
| Grcc10   | Grcc10-004   | 0.0127833   | 0.000377288 | -2650.49 |
| Grcc10   | Grcc10-001   | 7.416e-05   | 0.441857    | -2.26317 |
| Greb1    | Greb1-011    | 0.0473811   | 1.57447     | 1.57447  |
| Greb1    | Greb1-201    | 0.00062507  | 1.76664     | 1.76664  |
| Greb1    | Greb1-001    | 0.000625295 | 1.76665     | 1.76665  |
| Grhl1    | Grhl1-202    | 0.0177646   | 1.78269     | 1.78269  |
| Grhl1    | Grhl1-201    | 0.0257755   | 8.34567     | 8.34567  |
| Grhpr    | Grhpr-001    | 0.0208416   | 1.40942     | 1.40942  |
| Gria2    | Gria2-002    | 0.000829336 | 1.53792     | 1.53792  |
| Gria2    | Gria2-006    | 0.0370144   | 2.40794     | 2.40794  |
| Grik4    | Grik4-201    | 0.0447421   | 0.687338    | -1.45489 |
| Grik5    | Grik5-003    | 0.0170181   | 1.92782     | 1.92782  |
| Grip1    | Grip1-014    | 0.0237295   | 0.46221     | -2.16352 |
| Grip1os1 | Grip1os1-002 | 0.0278167   | 0.00197186  | -507.136 |
| Gripap1  | Gripap1-007  | 0.0292467   | 1.54153     | 1.54153  |
| Grm1     | Grm1-002     | 0.0355568   | 0.674326    | -1.48296 |
| Grn      | Grn-001      | 0.000130792 | 0.668992    | -1.49479 |
| Grrp1    | Grrp1-001    | 0.000365025 | 0.451493    | -2.21488 |
| Grsf1    | Grsf1-002    | 0.0414084   | 1.2677      | 1.2677   |
| Gsg1l    | Gsg1l-001    | 0.00409232  | 1.39158     | 1.39158  |
| Gskip    | Gskip-201    | 0.00556108  | 1.32191     | 1.32191  |
| Gsn      | Gsn-005      | 0.00528891  | 0.635712    | -1.57304 |
| Gspt1    | Gspt1-004    | 0.0162398   | 1.76357     | 1.76357  |

|          |              |             |          |          |
|----------|--------------|-------------|----------|----------|
| Gspt2    | Gspt2-001    | 0.00488475  | 1.37453  | 1.37453  |
| Gsr      | Gsr-003      | 0.0465153   | 1.32071  | 1.32071  |
| Gss      | Gss-003      | 0.007861    | 1.53161  | 1.53161  |
| Gss      | Gss-001      | 0.0229198   | 2.46806  | 2.46806  |
| Gstm5    | Gstm5-006    | 0.00859478  | 3.7872   | 3.7872   |
| Gstm6    | Gstm6-006    | 0.0142359   | 2.9791   | 2.9791   |
| Gstm6    | Gstm6-002    | 0.0289418   | 7.91428  | 7.91428  |
| Gstm7    | Gstm7-001    | 0.00163693  | 4.2822   | 4.2822   |
| Gsto1    | Gsto1-001    | 0.00738268  | 1.61289  | 1.61289  |
| Gstp1    | Gstp1-001    | 0.000726408 | 1.29291  | 1.29291  |
| Gstt2    | Gstt2-201    | 0.00424137  | 2.31977  | 2.31977  |
| Gstz1    | Gstz1-201    | 0.021866    | 0.838147 | -1.19311 |
| Gtf2a1   | Gtf2a1-001   | 0.00974244  | 1.26034  | 1.26034  |
| Gtf2a1   | Gtf2a1-002   | 0.0114643   | 5.40908  | 5.40908  |
| Gtf2f2   | Gtf2f2-201   | 0.0119495   | 1.32538  | 1.32538  |
| Gtf2h2   | Gtf2h2-001   | 0.00741501  | 1.25025  | 1.25025  |
| Gtf2h2   | Gtf2h2-004   | 0.0348854   | 1.30177  | 1.30177  |
| Gtf2h2   | Gtf2h2-005   | 0.0101657   | 1.7286   | 1.7286   |
| Gtf2h2   | Gtf2h2-002   | 0.00235339  | 2.46583  | 2.46583  |
| Gtf2h3   | Gtf2h3-003   | 0.00102886  | 2.03033  | 2.03033  |
| Gtf2h5   | Gtf2h5-002   | 0.0233606   | 1.2978   | 1.2978   |
| Gtf2i    | Gtf2i-017    | 0.0497135   | 0.836308 | -1.19573 |
| Gtf2ird1 | Gtf2ird1-027 | 0.00891564  | 3.29783  | 3.29783  |
| Gtf3a    | Gtf3a-001    | 0.00325014  | 1.47505  | 1.47505  |
| Gtf3c3   | Gtf3c3-001   | 0.0130584   | 1.13511  | 1.13511  |
| Gtpbp2   | Gtpbp2-012   | 0.0145201   | 1.57421  | 1.57421  |
| Gtpbp2   | Gtpbp2-016   | 0.0331263   | 2.03931  | 2.03931  |
| Gtpbp2   | Gtpbp2-009   | 0.0477252   | 22.216   | 22.216   |
| Gtpbp4   | Gtpbp4-201   | 0.0458975   | 1.27835  | 1.27835  |
| Gtpbp8   | Gtpbp8-004   | 0.00729047  | 2.91975  | 2.91975  |
| Gucy1a2  | Gucy1a2-201  | 0.0433811   | 0.67605  | -1.47918 |
| Gucy1a3  | Gucy1a3-001  | 0.000634291 | 1.47399  | 1.47399  |
| Gucy1b3  | Gucy1b3-004  | 0.000306313 | 1.30794  | 1.30794  |
| Gucy2g   | Gucy2g-001   | 0.0308202   | 1.61545  | 1.61545  |
| Guf1     | Guf1-007     | 0.0107767   | 0.763967 | -1.30896 |
| Gusb     | Gusb-001     | 0.000517366 | 0.289369 | -3.4558  |
| Gusb     | Gusb-006     | 0.00127045  | 0.386878 | -2.58479 |
| Gxylt1   | Gxylt1-002   | 0.00993607  | 3.18752  | 3.18752  |
| H13      | H13-005      | 0.00861336  | 1.46545  | 1.46545  |
| H2-DMa   | H2-DMa-001   | 0.0131512   | 2.01959  | 2.01959  |
| H2-K1    | H2-K1-007    | 0.0104038   | 1.92833  | 1.92833  |
| H2-K1    | H2-K1-002    | 0.0472592   | 1.94362  | 1.94362  |
| H2-K1    | H2-K1-010    | 0.0437913   | 2.38894  | 2.38894  |

|        |            |             |          |          |
|--------|------------|-------------|----------|----------|
| H2-M3  | H2-M3-001  | 0.00726432  | 1.37793  | 1.37793  |
| H2-T10 | H2-T10-003 | 0.0336987   | 0.320362 | -3.12147 |
| H2-T22 | H2-T22-001 | 0.0140105   | 0.338582 | -2.95349 |
| H2-T23 | H2-T23-001 | 0.0454315   | 1.15186  | 1.15186  |
| H2afj  | H2afj-001  | 0.0291485   | 0.70291  | -1.42266 |
| H2afx  | H2afx-001  | 0.0309301   | 1.53514  | 1.53514  |
| H2afy  | H2afy-001  | 0.00760695  | 0.76154  | -1.31313 |
| H2afy  | H2afy-007  | 0.0489885   | 1.64263  | 1.64263  |
| H3f3b  | H3f3b-001  | 0.00114171  | 3.01312  | 3.01312  |
| H60b   | H60b-201   | 0.0115386   | 0.576194 | -1.73553 |
| H60b   | H60b-001   | 0.0115385   | 0.576195 | -1.73552 |
| Hadh   | Hadh-001   | 0.00233382  | 1.20658  | 1.20658  |
| Hadha  | Hadha-007  | 0.0354867   | 0.274611 | -3.64151 |
| Hagh   | Hagh-007   | 0.0409774   | 1826.23  | 1826.23  |
| Haghl  | Haghl-009  | 0.024066    | 1.67386  | 1.67386  |
| Harbi1 | Harbi1-005 | 0.0418107   | 1394.55  | 1394.55  |
| Hars2  | Hars2-005  | 0.0234992   | 1.74232  | 1.74232  |
| Has3   | Has3-001   | 0.0128842   | 0.675272 | -1.48088 |
| Hat1   | Hat1-001   | 0.00757329  | 2.18916  | 2.18916  |
| Haus8  | Haus8-004  | 0.000730352 | 2.04382  | 2.04382  |
| Hax1   | Hax1-001   | 0.000209545 | 1.57912  | 1.57912  |
| Hbegf  | Hbegf-201  | 0.0416116   | 0.685528 | -1.45873 |
| Hbs1l  | Hbs1l-201  | 0.00465742  | 0.845443 | -1.18281 |
| Hcfc1  | Hcfc1-007  | 0.0276506   | 2.26305  | 2.26305  |
| Hcfc2  | Hcfc2-001  | 0.00624211  | 1.24242  | 1.24242  |
| Hcfc2  | Hcfc2-004  | 0.00984103  | 1.26813  | 1.26813  |
| Hcn2   | Hcn2-201   | 0.01455     | 0.606839 | -1.64788 |
| Hcn2   | Hcn2-001   | 0.00201645  | 0.64386  | -1.55313 |
| Hcn3   | Hcn3-001   | 0.00272934  | 0.689983 | -1.44931 |
| Hcrtr1 | Hcrtr1-001 | 0.016851    | 5.53522  | 5.53522  |
| Hcrtr1 | Hcrtr1-002 | 0.016851    | 5.53522  | 5.53522  |
| Hcrtr1 | Hcrtr1-003 | 0.016851    | 5.53523  | 5.53523  |
| Hdac1  | Hdac1-003  | 0.0245294   | 0.546437 | -1.83004 |
| Hdac10 | Hdac10-004 | 0.00793461  | 0.335779 | -2.97815 |
| Hdac2  | Hdac2-001  | 0.000496678 | 0.736604 | -1.35758 |
| Hdac3  | Hdac3-001  | 0.000666946 | 0.724047 | -1.38113 |
| Hdac4  | Hdac4-003  | 0.0416699   | 0.219541 | -4.55497 |
| Hdac4  | Hdac4-201  | 0.00189414  | 4.5157   | 4.5157   |
| Hdac6  | Hdac6-201  | 0.00930838  | 0.644593 | -1.55137 |
| Hdac8  | Hdac8-001  | 0.00760412  | 1.80364  | 1.80364  |
| Hdac9  | Hdac9-201  | 0.010317    | 1.68862  | 1.68862  |
| Hddc3  | Hddc3-008  | 0.0128137   | 2.05168  | 2.05168  |
| Hddc3  | Hddc3-003  | 0.0220281   | 2.08548  | 2.08548  |

|           |               |             |             |             |
|-----------|---------------|-------------|-------------|-------------|
| Hdhd2     | Hdhd2-001     | 0.0366983   | 1.28081     | 1.28081     |
| Hdhd2     | Hdhd2-002     | 0.012821    | 4.40262     | 4.40262     |
| Hdlbp     | Hdlbp-001     | 1.7381e-06  | 0.671199    | -1.48987    |
| Hdlbp     | Hdlbp-004     | 0.00367947  | 1.40247     | 1.40247     |
| Hdlbp     | Hdlbp-003     | 0.000245089 | 1.88012     | 1.88012     |
| Heatr5b   | Heatr5b-201   | 0.00440714  | 1.15275     | 1.15275     |
| Heatr6    | Heatr6-002    | 0.0206746   | 1.69923     | 1.69923     |
| Hectd3    | Hectd3-001    | 0.0275956   | 0.874574    | -1.14341    |
| Hells     | Hells-004     | 0.0165411   | 1.5646      | 1.5646      |
| Helz      | Helz-002      | 0.0111478   | 0.52397     | -1.9085     |
| Helz      | Helz-201      | 0.001566    | 1.63122     | 1.63122     |
| Hemk1     | Hemk1-001     | 0.0102004   | 1.54643     | 1.54643     |
| Herc1     | Herc1-002     | 0.00195106  | 2.21355     | 2.21355     |
| Herc3     | Herc3-001     | 0.00207101  | 1.40117     | 1.40117     |
| Herpud1   | Herpud1-002   | 0.00203889  | 1.77061     | 1.77061     |
| Herpud1   | Herpud1-001   | 0.000418971 | 1.83375     | 1.83375     |
| Herpud1   | Herpud1-003   | 0.00455012  | 1.96768     | 1.96768     |
| Hes6      | Hes6-001      | 0.0397685   | 0.732687    | -1.36484    |
| Hexa      | Hexa-201      | 0.00592273  | 0.742498    | -1.34681    |
| Hexdc     | Hexdc-003     | 0.013388    | 1.49498     | 1.49498     |
| Hexim2    | Hexim2-004    | 0.0229614   | 4.60474     | 4.60474     |
| Hey1      | Hey1-001      | 0.0119238   | 1.55953     | 1.55953     |
| Hfm1      | Hfm1-002      | 0.0478365   | 0.197564    | -5.06166    |
| Hgs       | Hgs-001       | 0.0323616   | 1.42475     | 1.42475     |
| Hibch     | Hibch-001     | 0.00531942  | 1.35375     | 1.35375     |
| Higd2a    | Higd2a-001    | 0.0137191   | 1.20552     | 1.20552     |
| Hilpda    | Hilpda-001    | 0.0283418   | 1.42275     | 1.42275     |
| Hinfp     | Hinfp-201     | 0.0127237   | 1.14836     | 1.14836     |
| Hint1     | Hint1-002     | 0.0373774   | 0.421449    | -2.37277    |
| Hint3     | Hint3-001     | 0.0278398   | 2.61449     | 2.61449     |
| Hint3     | Hint3-003     | 0.0259289   | 2.63359     | 2.63359     |
| Hip1      | Hip1-009      | 0.00322514  | 3.19327     | 3.19327     |
| Hip1      | Hip1-003      | 0.0173738   | 4.38785     | 4.38785     |
| Hip1r     | Hip1r-001     | 0.00191628  | 0.770164    | -1.29842    |
| Hipk2     | Hipk2-005     | 0.000837241 | 2.74581     | 2.74581     |
| Hipk3     | Hipk3-001     | 0.0481362   | 0.672246    | -1.48755    |
| Hira      | Hira-005      | 0.0308008   | 1.70144     | 1.70144     |
| Hira      | Hira-004      | 0.0302662   | 1.84071     | 1.84071     |
| Hist1h1b  | Hist1h1b-001  | 0.0173845   | 2.91306     | 2.91306     |
| Hist1h1c  | Hist1h1c-001  | 0.0117938   | 2.33557     | 2.33557     |
| Hist1h2ac | Hist1h2ac-001 | 0.0322865   | 1.11787e+08 | 1.11787e+08 |
| Hist1h2ae | Hist1h2ae-001 | 0.0348806   | 4.25677     | 4.25677     |
| Hist1h2ba | Hist1h2ba-001 | 0.0178364   | 8.55629     | 8.55629     |



|           |               |             |            |          |
|-----------|---------------|-------------|------------|----------|
| Hist1h2bb | Hist1h2bb-001 | 0.00765669  | 5.13356    | 5.13356  |
| Hist1h2bc | Hist1h2bc-001 | 0.00639844  | 3.66849    | 3.66849  |
| Hist1h4i  | Hist1h4i-001  | 0.0152185   | 2.78257    | 2.78257  |
| Hist1h4j  | Hist1h4j-001  | 0.00243705  | 5.28821    | 5.28821  |
| Hist1h4k  | Hist1h4k-001  | 0.029558    | 3.71705    | 3.71705  |
| Hist2h2bb | Hist2h2bb-001 | 0.019462    | 4.56813    | 4.56813  |
| Hist2h3c2 | Hist2h3c2-001 | 0.000493455 | 11.8837    | 11.8837  |
| Hist2h4   | Hist2h4-001   | 0.00202255  | 4.45376    | 4.45376  |
| Hist3h2a  | Hist3h2a-001  | 0.0332671   | 2.09789    | 2.09789  |
| Hist3h2ba | Hist3h2ba-001 | 0.000109377 | 2.34079    | 2.34079  |
| Hk1       | Hk1-003       | 0.0340092   | 0.00495796 | -201.696 |
| Hk1       | Hk1-011       | 0.0340089   | 0.00495798 | -201.695 |
| Hk1os     | Hk1os-002     | 0.0012283   | 2.04967    | 2.04967  |
| Hk2       | Hk2-002       | 0.00333493  | 1.97902    | 1.97902  |
| Hk3       | Hk3-002       | 0.00178459  | 0.179944   | -5.55728 |
| Hkdc1     | Hkdc1-001     | 0.0403615   | 2.10597    | 2.10597  |
| Hmbox1    | Hmbox1-006    | 7.67221e-06 | 0.552592   | -1.80965 |
| Hmbox1    | Hmbox1-003    | 0.0427711   | 0.63328    | -1.57908 |
| Hmbox1    | Hmbox1-201    | 0.0192422   | 0.785076   | -1.27376 |
| Hmces     | Hmces-001     | 0.00229224  | 1.47897    | 1.47897  |
| Hmg20b    | Hmg20b-001    | 0.012826    | 0.443071   | -2.25697 |
| Hmg20b    | Hmg20b-004    | 0.00122878  | 0.707823   | -1.41278 |
| Hmg20b    | Hmg20b-008    | 0.0320082   | 3.51334    | 3.51334  |
| Hmga1-rs1 | Hmga1-rs1-001 | 0.018849    | 0.560325   | -1.78468 |
| Hmgb3     | Hmgb3-006     | 0.0192967   | 1.70503    | 1.70503  |
| Hmgcl     | Hmgcl-005     | 0.0353202   | 1.86682    | 1.86682  |
| Hmgcll1   | Hmgcll1-001   | 0.000109031 | 0.57905    | -1.72697 |
| Hmgn2     | Hmgn2-002     | 0.019894    | 0.544101   | -1.83789 |
| Hmgn5     | Hmgn5-001     | 0.0202884   | 1.20713    | 1.20713  |
| Hmgxb3    | Hmgxb3-201    | 0.00364265  | 1.32521    | 1.32521  |
| Hmha1     | Hmha1-004     | 0.000144392 | 0.463479   | -2.1576  |
| Hmox1     | Hmox1-001     | 0.000443031 | 2.80665    | 2.80665  |
| Hn1       | Hn1-001       | 0.0033798   | 0.616104   | -1.6231  |
| Hn1       | Hn1-003       | 0.0475974   | 1.9403     | 1.9403   |
| Hnrnpa1   | Hnrnpa1-201   | 0.0193735   | 0.646889   | -1.54586 |
| Hnrnpa2b1 | Hnrnpa2b1-201 | 0.00221724  | 1.2915     | 1.2915   |
| Hnrnpa3   | Hnrnpa3-001   | 0.00911136  | 0.903112   | -1.10728 |
| Hnrnpa3   | Hnrnpa3-002   | 0.0171259   | 1.08933    | 1.08933  |
| Hnrnpa3   | Hnrnpa3-202   | 0.0171758   | 1.18727    | 1.18727  |
| Hnrnpc    | Hnrnpc-201    | 0.00162802  | 1.20616    | 1.20616  |
| Hnrnpd    | Hnrnpd-001    | 0.0030968   | 0.38672    | -2.58585 |
| Hnrnpdl   | Hnrnpdl-007   | 0.0219518   | 0.0678247  | -14.7439 |
| Hnrnpdl   | Hnrnpdl-004   | 0.000767909 | 0.70428    | -1.41989 |

|          |              |             |           |          |
|----------|--------------|-------------|-----------|----------|
| Hnrnph1  | Hnrnph1-003  | 0.00337065  | 0.309328  | -3.23281 |
| Hnrnph1  | Hnrnph1-014  | 0.03732     | 0.641634  | -1.55852 |
| Hnrnph1  | Hnrnph1-007  | 0.00191494  | 0.765423  | -1.30647 |
| Hnrnph1  | Hnrnph1-009  | 0.0447895   | 0.804707  | -1.24269 |
| Hnrnph3  | Hnrnph3-002  | 0.0266502   | 1.40046   | 1.40046  |
| Hnrnphk  | Hnrnphk-003  | 0.0289635   | 0.702482  | -1.42352 |
| Hnrnphk  | Hnrnphk-021  | 0.00045055  | 1.26327   | 1.26327  |
| Hnrnphk  | Hnrnphk-014  | 0.00460747  | 1.26489   | 1.26489  |
| Hnrnphk  | Hnrnphk-020  | 0.0330212   | 1.64527   | 1.64527  |
| Hnrnpl   | Hnrnpl-009   | 0.0011184   | 2.02985   | 2.02985  |
| Hnrnpl   | Hnrnpl-010   | 6.03208e-06 | 2.67679   | 2.67679  |
| Hnrnprm  | Hnrnprm-004  | 0.0371394   | 0.846475  | -1.18137 |
| Hnrnpr   | Hnrnpr-001   | 0.0277784   | 1.14413   | 1.14413  |
| Hnrnpr   | Hnrnpr-005   | 0.0350637   | 2.22095   | 2.22095  |
| Hnrnpr   | Hnrnpr-006   | 0.0162028   | 3.6065    | 3.6065   |
| Hnrnpul1 | Hnrnpul1-001 | 0.0411592   | 1.28688   | 1.28688  |
| Homer1   | Homer1-008   | 0.0298014   | 0.558308  | -1.79113 |
| Homez    | Homez-004    | 0.0412812   | 0.50334   | -1.98673 |
| Hook1    | Hook1-001    | 0.0387654   | 0.900148  | -1.11093 |
| Hoxc4    | Hoxc4-001    | 0.031476    | 0.341925  | -2.92462 |
| Hoxc6    | Hoxc6-003    | 0.0445215   | 2.09995   | 2.09995  |
| Hoxc6    | Hoxc6-002    | 0.00657277  | 2.5595    | 2.5595   |
| Hp1bp3   | Hp1bp3-202   | 0.0395684   | 1.48648   | 1.48648  |
| Hp1bp3   | Hp1bp3-007   | 0.0363498   | 61.2301   | 61.2301  |
| Hpca     | Hpca-001     | 0.0481737   | 0.700715  | -1.42711 |
| Hpn      | Hpn-003      | 0.0296768   | 0.0256358 | -39.008  |
| Hpn      | Hpn-005      | 0.0491223   | 0.248934  | -4.01712 |
| Hpn      | Hpn-009      | 0.0252116   | 0.257778  | -3.8793  |
| Hpn      | Hpn-008      | 0.0148659   | 0.404147  | -2.47435 |
| Hprt     | Hprt-001     | 0.0225906   | 1.12649   | 1.12649  |
| Hps5     | Hps5-013     | 0.0191929   | 6.46183   | 6.46183  |
| Hr       | Hr-001       | 0.0479849   | 0.818557  | -1.22166 |
| Hrsp12   | Hrsp12-001   | 0.00573889  | 1.66993   | 1.66993  |
| Hs2st1   | Hs2st1-002   | 0.0416726   | 3.2069    | 3.2069   |
| Hs3st2   | Hs3st2-001   | 0.0111449   | 0.404971  | -2.46931 |
| Hs3st3b1 | Hs3st3b1-001 | 0.0389639   | 0.771737  | -1.29578 |
| Hs6st1   | Hs6st1-002   | 8.66024e-06 | 0.623429  | -1.60403 |
| Hsbp1    | Hsbp1-201    | 0.0036928   | 0.908941  | -1.10018 |
| Hsd11b2  | Hsd11b2-201  | 0.00662151  | 0.452906  | -2.20796 |
| Hsd17b11 | Hsd17b11-001 | 0.0184876   | 0.776513  | -1.28781 |
| Hsd17b4  | Hsd17b4-001  | 0.00728643  | 1.18181   | 1.18181  |
| Hsd17b7  | Hsd17b7-002  | 0.0115528   | 1.98812   | 1.98812  |
| Hsf2     | Hsf2-201     | 2.04163e-05 | 1.25384   | 1.25384  |

|         |             |             |            |            |
|---------|-------------|-------------|------------|------------|
| Hsf4    | Hsf4-001    | 0.0274778   | 0.0112432  | -88.9429   |
| Hsp90b1 | Hsp90b1-005 | 2.74453e-08 | 7.7396e+07 | 7.7396e+07 |
| Hspa12a | Hspa12a-201 | 0.0173846   | 0.834684   | -1.19806   |
| Hspa4   | Hspa4-003   | 0.0458145   | 1.20952    | 1.20952    |
| Hspa4l  | Hspa4l-001  | 5.01362e-05 | 0.67788    | -1.47519   |
| Hspa5   | Hspa5-001   | 0.00279439  | 1.39567    | 1.39567    |
| Hspa9   | Hspa9-001   | 0.00078479  | 1.2919     | 1.2919     |
| Hspb6   | Hspb6-002   | 0.021042    | 1.55436    | 1.55436    |
| Hspb6   | Hspb6-003   | 0.0117865   | 1.8413     | 1.8413     |
| Hspb8   | Hspb8-001   | 0.00260705  | 1.25269    | 1.25269    |
| Hspg2   | Hspg2-201   | 0.00273282  | 0.430963   | -2.32038   |
| Hspg2   | Hspg2-001   | 0.000578463 | 0.453927   | -2.203     |
| Hsph1   | Hsph1-009   | 0.00555864  | 0.273489   | -3.65645   |
| Hsph1   | Hsph1-010   | 0.0148476   | 0.587816   | -1.70121   |
| Hsph1   | Hsph1-005   | 0.010053    | 4.39939    | 4.39939    |
| Htatsf1 | Htatsf1-001 | 0.0153385   | 1.34479    | 1.34479    |
| Htra2   | Htra2-007   | 0.000453771 | 0.190071   | -5.2612    |
| Htra2   | Htra2-001   | 4.83092e-05 | 0.578193   | -1.72952   |
| Hus1    | Hus1-006    | 0.00874111  | 1.69187    | 1.69187    |
| Hus1    | Hus1-005    | 0.0449729   | 11.5592    | 11.5592    |
| Hvcn1   | Hvcn1-002   | 0.00643982  | 0.275418   | -3.63084   |
| Hyou1   | Hyou1-001   | 0.0281637   | 1.32592    | 1.32592    |
| lars    | lars-201    | 0.0214548   | 1.21888    | 1.21888    |
| lars    | lars-001    | 0.00892801  | 1.2304     | 1.2304     |
| lca1    | lca1-009    | 0.0498346   | 0.0885026  | -11.2991   |
| lca1    | lca1-006    | 0.00402075  | 1.466      | 1.466      |
| lcam1   | lcam1-201   | 0.0346484   | 0.353446   | -2.82929   |
| lcam2   | lcam2-001   | 0.000461168 | 0.655049   | -1.5266    |
| lce1    | lce1-201    | 0.0196514   | 1.20128    | 1.20128    |
| lcmt    | lcmt-001    | 0.00207385  | 0.762642   | -1.31123   |
| ld1     | ld1-001     | 0.0160507   | 1.74868    | 1.74868    |
| ld1     | ld1-002     | 0.0245613   | 3.39492    | 3.39492    |
| lde     | lde-003     | 0.000539714 | 2.92548    | 2.92548    |
| lde     | lde-002     | 0.00711357  | 5.65798    | 5.65798    |
| ldh1    | ldh1-201    | 0.0330265   | 1.50434    | 1.50434    |
| ldh2    | ldh2-003    | 0.00426516  | 0.121877   | -8.20499   |
| ldh3b   | ldh3b-001   | 0.00895656  | 1.10277    | 1.10277    |
| lds     | lds-001     | 0.000182159 | 1.49305    | 1.49305    |
| ler2    | ler2-201    | 0.0474933   | 1.14794    | 1.14794    |
| ler5l   | ler5l-001   | 0.0368868   | 0.60289    | -1.65868   |
| lffo1   | lffo1-004   | 0.00521774  | 0.249231   | -4.01234   |
| lfi27   | lfi27-001   | 0.0477498   | 0.676323   | -1.47858   |
| lfih1   | lfih1-002   | 0.0147829   | 6.33774    | 6.33774    |

|          |              |             |          |          |
|----------|--------------|-------------|----------|----------|
| lfit3b   | lfit3b-001   | 0.0389536   | 2.39344  | 2.39344  |
| lfitm3   | lfitm3-001   | 0.0121738   | 1.30902  | 1.30902  |
| lfngr1   | lfngr1-005   | 0.0230137   | 2.74457  | 2.74457  |
| lfngr2   | lfngr2-001   | 0.000471558 | 0.707619 | -1.41319 |
| lfrd1    | lfrd1-007    | 0.0223903   | 1.17522  | 1.17522  |
| lft122   | lft122-003   | 0.0116069   | 1.52011  | 1.52011  |
| lft122   | lft122-001   | 0.00877127  | 1.60801  | 1.60801  |
| lft20    | lft20-002    | 0.0183367   | 1.89217  | 1.89217  |
| lft22    | lft22-004    | 0.0379462   | 1.3751   | 1.3751   |
| lft43    | lft43-201    | 0.00803743  | 0.756046 | -1.32267 |
| lft46    | lft46-011    | 0.0494819   | 1.33014  | 1.33014  |
| lft52    | lft52-001    | 0.0318157   | 1.10197  | 1.10197  |
| lft52    | lft52-002    | 0.0284587   | 2.61193  | 2.61193  |
| lft57    | lft57-003    | 0.00483134  | 1.35685  | 1.35685  |
| lft80    | lft80-201    | 0.030845    | 0.603063 | -1.6582  |
| lft80    | lft80-002    | 0.0118819   | 1.69577  | 1.69577  |
| lft81    | lft81-001    | 0.00112364  | 1.27485  | 1.27485  |
| lft81    | lft81-008    | 0.0333567   | 2.50326  | 2.50326  |
| lgf2bp3  | lgf2bp3-001  | 0.0167553   | 0.538913 | -1.85559 |
| lgf2r    | lgf2r-001    | 0.00086362  | 0.377493 | -2.64906 |
| lgfbp4   | lgfbp4-001   | 0.00475436  | 0.780473 | -1.28127 |
| lgfbp4   | lgfbp4-004   | 0.00245884  | 0.807071 | -1.23905 |
| lgfbp5   | lgfbp5-002   | 0.0276416   | 0.426342 | -2.34554 |
| lgfbp5   | lgfbp5-001   | 0.0495186   | 0.721002 | -1.38696 |
| lgfbp7   | lgfbp7-001   | 0.00824915  | 0.499687 | -2.00125 |
| lghmbp2  | lghmbp2-001  | 0.0321073   | 1.30639  | 1.30639  |
| lgkv4-78 | lgkv4-78-001 | 0.00669575  | 0.140578 | -7.1135  |
| lgsf23   | lgsf23-201   | 0.000976719 | 1.35579  | 1.35579  |
| lgsf8    | lgsf8-002    | 0.00317535  | 0.676743 | -1.47767 |
| lk       | lk-201       | 0.000441918 | 1.23146  | 1.23146  |
| lkbkap   | lkbkap-006   | 0.00722959  | 0.560989 | -1.78256 |
| lkbkb    | lkbkb-002    | 0.00187346  | 0.304857 | -3.28022 |
| lkbkb    | lkbkb-001    | 0.0295862   | 0.468235 | -2.13568 |
| lkbkb    | lkbkb-010    | 0.0109839   | 0.692322 | -1.44442 |
| lkbkb    | lkbkb-011    | 0.0181706   | 0.70252  | -1.42345 |
| lkbkg    | lkbkg-006    | 0.0374564   | 0.738195 | -1.35466 |
| lkbkg    | lkbkg-005    | 0.0374802   | 1.78323  | 1.78323  |
| lkzf2    | lkzf2-001    | 0.00727622  | 0.477816 | -2.09285 |
| ll11ra1  | ll11ra1-003  | 0.0128996   | 0.339519 | -2.94534 |
| ll17rc   | ll17rc-003   | 0.0337251   | 0.702749 | -1.42298 |
| ll17rd   | ll17rd-201   | 0.00432213  | 0.729767 | -1.3703  |
| ll18bp   | ll18bp-201   | 0.00705914  | 1.33076  | 1.33076  |
| ll1rap   | ll1rap-001   | 0.0294271   | 10.9058  | 10.9058  |

|         |             |             |           |          |
|---------|-------------|-------------|-----------|----------|
| ll27ra  | ll27ra-201  | 0.00104286  | 0.701124  | -1.42628 |
| ll4i1   | ll4i1-201   | 3.32881e-06 | 1.5142    | 1.5142   |
| ll4ra   | ll4ra-002   | 0.0083128   | 0.811875  | -1.23172 |
| ll6     | ll6-001     | 0.049203    | 0.333271  | -3.00057 |
| ll6     | ll6-004     | 0.000231881 | 0.421775  | -2.37093 |
| ll6st   | ll6st-008   | 0.0157302   | 6.26411   | 6.26411  |
| llf3    | llf3-202    | 0.0197228   | 0.916898  | -1.09063 |
| llk     | llk-001     | 0.0376815   | 0.745999  | -1.34048 |
| llkap   | llkap-013   | 0.0212232   | 0.0349304 | -28.6283 |
| llkap   | llkap-011   | 0.00104759  | 0.537421  | -1.86074 |
| lmpmp1l | lmpmp1l-001 | 0.043517    | 1.27469   | 1.27469  |
| lmmt    | lmmt-010    | 0.00818694  | 0.609836  | -1.63979 |
| lmpa1   | lmpa1-004   | 0.0295693   | 1.52162   | 1.52162  |
| lmpa2   | lmpa2-201   | 0.0492195   | 0.859135  | -1.16396 |
| lmpact  | lmpact-201  | 0.00243058  | 1.29414   | 1.29414  |
| lmpdh1  | lmpdh1-001  | 0.0087307   | 1.1415    | 1.1415   |
| lmpg2   | lmpg2-001   | 0.0281199   | 0.253643  | -3.94255 |
| lnafm2  | lnafm2-001  | 0.0030494   | 0.676395  | -1.47843 |
| lnf2    | lnf2-201    | 0.00432226  | 0.794391  | -1.25883 |
| lng3    | lng3-003    | 0.0239654   | 1.95276   | 1.95276  |
| lnhbc   | lnhbc-201   | 0.00169825  | 4.68627   | 4.68627  |
| lno80   | lno80-001   | 0.00370968  | 1.18543   | 1.18543  |
| lno80c  | lno80c-001  | 0.016831    | 0.567077  | -1.76343 |
| lno80d  | lno80d-001  | 0.0428531   | 4.51527   | 4.51527  |
| lno80d  | lno80d-002  | 0.025723    | 919.067   | 919.067  |
| lnpp5b  | lnpp5b-002  | 0.00289197  | 2.08614   | 2.08614  |
| lnpp5e  | lnpp5e-002  | 0.0363646   | 2.55833   | 2.55833  |
| lnpp5j  | lnpp5j-006  | 0.0446547   | 2.35715   | 2.35715  |
| lnpp5j  | lnpp5j-004  | 0.00522149  | 17.1624   | 17.1624  |
| lnppl1  | lnppl1-003  | 0.0235821   | 0.725015  | -1.37928 |
| lnsr    | lnsr-001    | 0.00370084  | 0.662264  | -1.50997 |
| lnts10  | lnts10-004  | 0.0203983   | 1.34037   | 1.34037  |
| lnts12  | lnts12-001  | 0.00163798  | 1.49028   | 1.49028  |
| lnts2   | lnts2-008   | 0.0105324   | 0.71177   | -1.40495 |
| lnts4   | lnts4-001   | 0.0295307   | 1.35493   | 1.35493  |
| lnts4   | lnts4-002   | 0.0240287   | 2.3966    | 2.3966   |
| lnts7   | lnts7-002   | 0.0437925   | 1.37784   | 1.37784  |
| lnts7   | lnts7-003   | 0.000325927 | 1.63982   | 1.63982  |
| lnts7   | lnts7-006   | 1.09983e-05 | 2.37048   | 2.37048  |
| lp6k2   | lp6k2-004   | 0.00560298  | 2.40395   | 2.40395  |
| lpmk    | lpmk-001    | 0.00621586  | 0.754086  | -1.32611 |
| lpmk    | lpmk-003    | 0.0300919   | 1.96522   | 1.96522  |
| lpo11   | lpo11-005   | 0.0435887   | 2.4545    | 2.4545   |

|          |              |             |          |          |
|----------|--------------|-------------|----------|----------|
| lpo13    | lpo13-004    | 0.0484968   | 0.337681 | -2.96137 |
| lpo4     | lpo4-002     | 0.0342676   | 0.504828 | -1.98087 |
| lpo4     | lpo4-003     | 0.0162767   | 0.625566 | -1.59855 |
| lpo8     | lpo8-002     | 0.0351556   | 1.35364  | 1.35364  |
| lpp      | lpp-001      | 0.0258722   | 1.87078  | 1.87078  |
| lqce     | lqce-002     | 0.0104907   | 1.58916  | 1.58916  |
| lqce     | lqce-010     | 0.0244156   | 1.72022  | 1.72022  |
| lqgap1   | lqgap1-001   | 0.000195421 | 0.56964  | -1.7555  |
| lrak1    | lrak1-001    | 0.00927612  | 0.761227 | -1.31367 |
| lrak1    | lrak1-018    | 0.00923829  | 1.79855  | 1.79855  |
| lrak1    | lrak1-014    | 0.0468692   | 3.52933  | 3.52933  |
| lrak1bp1 | lrak1bp1-001 | 0.00813164  | 1.1873   | 1.1873   |
| lrak4    | lrak4-001    | 0.0355625   | 1.45794  | 1.45794  |
| lrf2bpl  | lrf2bpl-201  | 0.042752    | 0.863937 | -1.15749 |
| lrf3     | lrf3-201     | 0.0451891   | 0.593861 | -1.68389 |
| lrf3     | lrf3-202     | 0.00314761  | 0.624715 | -1.60073 |
| lrgm2    | lrgm2-001    | 0.00394533  | 2.16169  | 2.16169  |
| lrgq     | lrgq-001     | 0.0425006   | 0.861422 | -1.16087 |
| lsg15    | lsg15-201    | 0.000545774 | 0.661293 | -1.51219 |
| lsl2     | lsl2-002     | 0.0395562   | 2.09631  | 2.09631  |
| lslr2    | lslr2-203    | 0.0314449   | 0.721143 | -1.38669 |
| lsyna1   | lsyna1-201   | 1.18938e-05 | 0.518314 | -1.92933 |
| ltch     | ltch-002     | 0.00474905  | 0.436018 | -2.29349 |
| ltfg2    | ltfg2-001    | 0.040592    | 1.35448  | 1.35448  |
| ltga1    | ltga1-201    | 0.00666268  | 0.679302 | -1.4721  |
| ltga11   | ltga11-001   | 0.0182899   | 0.345908 | -2.89094 |
| ltga2    | ltga2-201    | 0.00821909  | 0.383886 | -2.60494 |
| ltgae    | ltgae-001    | 0.0420638   | 1.74875  | 1.74875  |
| ltgal    | ltgal-003    | 0.00168446  | 0.155016 | -6.45096 |
| ltgav    | ltgav-001    | 0.000593972 | 0.827876 | -1.20791 |
| ltgb1    | ltgb1-001    | 0.000355467 | 0.749725 | -1.33382 |
| ltgb1bp1 | ltgb1bp1-006 | 0.0278556   | 1.30855  | 1.30855  |
| ltgb1bp2 | ltgb1bp2-001 | 0.0386059   | 0.50269  | -1.9893  |
| ltgb3    | ltgb3-001    | 0.0239467   | 0.554889 | -1.80216 |
| ltgb5    | ltgb5-005    | 0.0274861   | 5016.11  | 5016.11  |
| ltgbl1   | ltgbl1-003   | 0.0225087   | 1.29319  | 1.29319  |
| ltgbl1   | ltgbl1-001   | 0.0225056   | 1.2932   | 1.2932   |
| ltm2b    | ltm2b-201    | 0.00667109  | 0.786062 | -1.27216 |
| ltpk1    | ltpk1-001    | 0.0301931   | 0.840217 | -1.19017 |
| ltpka    | ltpka-001    | 0.0179466   | 0.744825 | -1.3426  |
| ltpkb    | ltpkb-001    | 0.0039969   | 1.65673  | 1.65673  |
| ltpr2    | ltpr2-001    | 0.0308055   | 0.65026  | -1.53785 |
| ltpr2    | ltpr2-004    | 0.0336224   | 348.351  | 348.351  |

|         |             |             |            |              |
|---------|-------------|-------------|------------|--------------|
| ltsn1   | ltsn1-005   | 0.00442934  | 2.07804    | 2.07804      |
| ltsn2   | ltsn2-201   | 0.000102269 | 1.29653    | 1.29653      |
| lvd     | lvd-004     | 0.0499749   | 0.437344   | -2.28653     |
| lvd     | lvd-007     | 0.00974013  | 0.801282   | -1.248       |
| Jade1   | Jade1-005   | 0.00383563  | 1.68349    | 1.68349      |
| Jade1   | Jade1-004   | 0.00503962  | 2.06487    | 2.06487      |
| Jakmip2 | Jakmip2-201 | 0.00452482  | 1.21093    | 1.21093      |
| Jarid2  | Jarid2-001  | 0.0154355   | 0.716029   | -1.39659     |
| Jkamp   | Jkamp-005   | 0.0357968   | 2.05203    | 2.05203      |
| Jmjd6   | Jmjd6-007   | 0.0289835   | 0.50838    | -1.96703     |
| Jmjd7   | Jmjd7-001   | 0.00376844  | 3.0104     | 3.0104       |
| Josd2   | Josd2-005   | 0.0357396   | 1.26377    | 1.26377      |
| Jph3    | Jph3-001    | 0.0154102   | 1.55926    | 1.55926      |
| Jph4    | Jph4-004    | 0.0349395   | 0.597617   | -1.67331     |
| Jph4    | Jph4-002    | 0.0280754   | 0.672001   | -1.48809     |
| Jph4    | Jph4-001    | 0.0234198   | 0.780581   | -1.2811      |
| Jup     | Jup-001     | 0.000903371 | 0.440718   | -2.26903     |
| Kalrn   | Kalrn-016   | 0.00213095  | 0.103094   | -9.69988     |
| Kalrn   | Kalrn-002   | 0.00031883  | 0.400087   | -2.49946     |
| Kalrn   | Kalrn-015   | 0.0140391   | 0.611393   | -1.63561     |
| Kank2   | Kank2-201   | 0.000969605 | 0.794145   | -1.25922     |
| Kansl2  | Kansl2-202  | 0.0344429   | 1.47482    | 1.47482      |
| Kansl3  | Kansl3-001  | 0.000172296 | 1.24981    | 1.24981      |
| Kansl3  | Kansl3-005  | 0.0280944   | 2.1527     | 2.1527       |
| Kantr   | Kantr-001   | 0.0261564   | 1.60196    | 1.60196      |
| Kat2a   | Kat2a-004   | 0.010414    | 0.680258   | -1.47003     |
| Kat5    | Kat5-201    | 0.000440637 | 1.35074    | 1.35074      |
| Kat7    | Kat7-009    | 0.0492459   | 2.2428e-09 | -4.45871e+08 |
| Kat8    | Kat8-002    | 0.00337878  | 1.59773    | 1.59773      |
| Katna1  | Katna1-001  | 0.00358776  | 1.30833    | 1.30833      |
| Katna1  | Katna1-201  | 0.00110058  | 1.33818    | 1.33818      |
| Katnal1 | Katnal1-006 | 0.00220619  | 4.29327    | 4.29327      |
| Katnal2 | Katnal2-005 | 0.0158321   | 6.58661    | 6.58661      |
| Kbtbd11 | Kbtbd11-002 | 0.0249541   | 1.74279    | 1.74279      |
| Kbtbd3  | Kbtbd3-201  | 0.00316931  | 1.67604    | 1.67604      |
| Kcmf1   | Kcmf1-001   | 0.000484518 | 0.660736   | -1.51346     |
| Kcmf1   | Kcmf1-002   | 0.00166526  | 1.33958    | 1.33958      |
| Kcmf1   | Kcmf1-006   | 0.00470525  | 1.62074    | 1.62074      |
| Kcnab1  | Kcnab1-001  | 0.00705336  | 1.28372    | 1.28372      |
| Kcnab2  | Kcnab2-008  | 0.0327106   | 2.63654    | 2.63654      |
| Kcnc1   | Kcnc1-002   | 0.0252749   | 0.614797   | -1.62655     |
| Kcnc1   | Kcnc1-001   | 0.020611    | 0.676923   | -1.47727     |
| Kcnh3   | Kcnh3-201   | 0.00994839  | 0.550553   | -1.81636     |

|           |               |             |           |          |
|-----------|---------------|-------------|-----------|----------|
| Kcnh7     | Kcnh7-001     | 0.0120349   | 1.44044   | 1.44044  |
| Kcnip2    | Kcnip2-201    | 0.0321357   | 0.373695  | -2.67598 |
| Kcnip2    | Kcnip2-004    | 0.0103425   | 3.3452    | 3.3452   |
| Kcnj6     | Kcnj6-201     | 0.00909376  | 0.322859  | -3.09733 |
| Kcnk1     | Kcnk1-201     | 0.0263554   | 1.26984   | 1.26984  |
| Kcnmb4    | Kcnmb4-001    | 6.18666e-05 | 0.596716  | -1.67584 |
| Kcnmb4    | Kcnmb4-002    | 0.0142753   | 1.72378   | 1.72378  |
| Kcnmb4os2 | Kcnmb4os2-001 | 0.0485706   | 3.1534    | 3.1534   |
| Kcnn3     | Kcnn3-002     | 0.00492353  | 0.359761  | -2.77962 |
| Kcnn3     | Kcnn3-001     | 0.0202748   | 0.524202  | -1.90766 |
| Kcnq2     | Kcnq2-013     | 0.0292186   | 0.602578  | -1.65954 |
| Kcnq2     | Kcnq2-018     | 0.0304173   | 0.662006  | -1.51056 |
| Kcnq4     | Kcnq4-001     | 0.046693    | 3.48298   | 3.48298  |
| Kcnq5     | Kcnq5-008     | 0.0276609   | 48.2382   | 48.2382  |
| Kcnu1     | Kcnu1-001     | 0.0218181   | 4.13516   | 4.13516  |
| Kctd13    | Kctd13-002    | 0.0207022   | 1.57454   | 1.57454  |
| Kctd18    | Kctd18-010    | 0.0331336   | 0.484706  | -2.0631  |
| Kctd20    | Kctd20-004    | 0.045537    | 2.98606   | 2.98606  |
| Kctd20    | Kctd20-201    | 0.00577119  | 4.50889   | 4.50889  |
| Kctd20    | Kctd20-002    | 0.0317322   | 5.37231   | 5.37231  |
| Kctd3     | Kctd3-006     | 0.0058468   | 0.227706  | -4.39162 |
| Kctd3     | Kctd3-001     | 0.0335614   | 1.26101   | 1.26101  |
| Kctd7     | Kctd7-001     | 0.0238877   | 1.49223   | 1.49223  |
| Kdm1a     | Kdm1a-009     | 0.0127866   | 2.3451    | 2.3451   |
| Kdm1b     | Kdm1b-005     | 0.0181595   | 0.177019  | -5.64912 |
| Kdm3a     | Kdm3a-004     | 0.0117563   | 0.677464  | -1.47609 |
| Kdm3a     | Kdm3a-201     | 0.0435352   | 0.750113  | -1.33313 |
| Kdm3b     | Kdm3b-201     | 0.00183212  | 0.840625  | -1.18959 |
| Kdm4a     | Kdm4a-002     | 0.0164877   | 1.36029   | 1.36029  |
| Kdm4a     | Kdm4a-005     | 0.0261981   | 1.40843   | 1.40843  |
| Kdm5a     | Kdm5a-001     | 0.00760359  | 0.840755  | -1.18941 |
| Kdm5c     | Kdm5c-004     | 0.00614398  | 1.26545   | 1.26545  |
| Kdm5c     | Kdm5c-005     | 0.045054    | 2.77625   | 2.77625  |
| Kdm6b     | Kdm6b-002     | 0.0215663   | 1.53251   | 1.53251  |
| Khk       | Khk-002       | 0.00207787  | 0.0234417 | -42.659  |
| Khsrp     | Khsrp-201     | 0.00186103  | 1.13433   | 1.13433  |
| Kidins220 | Kidins220-201 | 0.00345986  | 0.830534  | -1.20404 |
| Kif17     | Kif17-002     | 0.000454183 | 2.1538    | 2.1538   |
| Kif18a    | Kif18a-001    | 0.00120041  | 1.32287   | 1.32287  |
| Kif1b     | Kif1b-001     | 0.0140611   | 0.801667  | -1.2474  |
| Kif1b     | Kif1b-003     | 0.0467271   | 2.56962   | 2.56962  |
| Kif1bp    | Kif1bp-006    | 0.0279828   | 0.368982  | -2.71016 |
| Kif1bp    | Kif1bp-001    | 0.0265442   | 1.19906   | 1.19906  |



|         |             |             |          |          |
|---------|-------------|-------------|----------|----------|
| Kif1c   | Kif1c-001   | 0.010045    | 0.206903 | -4.83319 |
| Kif24   | Kif24-001   | 0.015308    | 0.818339 | -1.22199 |
| Kif26a  | Kif26a-001  | 0.000174051 | 0.572422 | -1.74696 |
| Kif2a   | Kif2a-001   | 0.0263752   | 0.712473 | -1.40356 |
| Kif2a   | Kif2a-005   | 0.0210472   | 1.27532  | 1.27532  |
| Kif5c   | Kif5c-001   | 0.0168727   | 0.834331 | -1.19856 |
| Kifc1   | Kifc1-005   | 0.0448874   | 1.79012  | 1.79012  |
| Kifc3   | Kifc3-203   | 0.0326372   | 0.793353 | -1.26047 |
| Kifc5b  | Kifc5b-201  | 0.00748434  | 1.16124  | 1.16124  |
| Klf3    | Klf3-004    | 0.035256    | 0.597966 | -1.67233 |
| Klf4    | Klf4-001    | 0.0324177   | 1.42171  | 1.42171  |
| Klf7    | Klf7-001    | 0.00380036  | 0.770607 | -1.29768 |
| Klhdc1  | Klhdc1-001  | 0.0221982   | 1.67912  | 1.67912  |
| Klhdc10 | Klhdc10-001 | 0.000797683 | 0.564767 | -1.77064 |
| Klhdc10 | Klhdc10-003 | 0.00572456  | 3.36111  | 3.36111  |
| Klhdc2  | Klhdc2-002  | 0.0215778   | 0.678098 | -1.47471 |
| Klhl12  | Klhl12-201  | 0.016381    | 1.45955  | 1.45955  |
| Klhl15  | Klhl15-002  | 0.0368869   | 7.94097  | 7.94097  |
| Klhl17  | Klhl17-201  | 0.002275    | 1.17764  | 1.17764  |
| Klhl18  | Klhl18-002  | 0.0333324   | 2.08283  | 2.08283  |
| Klhl18  | Klhl18-006  | 0.0405016   | 5.11407  | 5.11407  |
| Klhl20  | Klhl20-003  | 0.0465107   | 1.92051  | 1.92051  |
| Klhl3   | Klhl3-001   | 0.019536    | 2.03119  | 2.03119  |
| Klhl33  | Klhl33-201  | 0.000825576 | 3.87305  | 3.87305  |
| Klhl36  | Klhl36-201  | 0.0435526   | 1.31457  | 1.31457  |
| Klhl7   | Klhl7-003   | 0.0118558   | 0.577269 | -1.73229 |
| Klhl8   | Klhl8-004   | 0.026067    | 4.55595  | 4.55595  |
| Klhl8   | Klhl8-003   | 0.0420798   | 165.116  | 165.116  |
| Kmt2a   | Kmt2a-201   | 0.0281441   | 0.776607 | -1.28765 |
| Kmt2c   | Kmt2c-006   | 0.016388    | 0.724996 | -1.37932 |
| Knop1   | Knop1-001   | 0.00786157  | 3.21425  | 3.21425  |
| Knop1   | Knop1-004   | 0.0313149   | 4.22733  | 4.22733  |
| Kntc1   | Kntc1-007   | 0.0362477   | 0.616663 | -1.62163 |
| Kpna1   | Kpna1-003   | 0.0498581   | 1.93926  | 1.93926  |
| Kpna2   | Kpna2-003   | 0.0430828   | 0.187262 | -5.3401  |
| Kptn    | Kptn-001    | 0.00100263  | 0.466589 | -2.14322 |
| Kras    | Kras-001    | 0.0459503   | 0.845546 | -1.18267 |
| Krba1   | Krba1-004   | 0.0499321   | 1.43662  | 1.43662  |
| Kremen1 | Kremen1-001 | 0.000414763 | 0.596265 | -1.67711 |
| Krit1   | Krit1-012   | 0.0399907   | 0.277129 | -3.60842 |
| Krit1   | Krit1-004   | 0.0382083   | 0.54456  | -1.83635 |
| Krit1   | Krit1-006   | 0.0106097   | 3.7208   | 3.7208   |
| Krtcap2 | Krtcap2-004 | 0.00106503  | 1.27804  | 1.27804  |

|         |             |             |          |          |
|---------|-------------|-------------|----------|----------|
| Ksr2    | Ksr2-001    | 0.00356947  | 0.495703 | -2.01734 |
| Ktn1    | Ktn1-005    | 0.0145291   | 0.453191 | -2.20658 |
| Ktn1    | Ktn1-019    | 0.0309175   | 1.5648   | 1.5648   |
| Ktn1    | Ktn1-013    | 0.0310016   | 1.75776  | 1.75776  |
| L1cam   | L1cam-001   | 0.0462569   | 0.681912 | -1.46647 |
| L1cam   | L1cam-008   | 0.0111845   | 0.710279 | -1.4079  |
| L1cam   | L1cam-005   | 0.041107    | 4.15817  | 4.15817  |
| l7Rn6   | l7Rn6-005   | 0.0366241   | 0.288174 | -3.47013 |
| Lace1   | Lace1-001   | 0.0388561   | 0.737132 | -1.35661 |
| Lactb   | Lactb-201   | 0.0206458   | 0.692084 | -1.44491 |
| Lactb2  | Lactb2-001  | 0.000887996 | 1.36656  | 1.36656  |
| Lactb2  | Lactb2-002  | 0.00413989  | 2.35013  | 2.35013  |
| Lama4   | Lama4-007   | 0.0187889   | 0.214825 | -4.65494 |
| Lama4   | Lama4-001   | 0.00237363  | 0.537912 | -1.85904 |
| Lama5   | Lama5-002   | 0.00632145  | 0.086887 | -11.5092 |
| Lamb2   | Lamb2-001   | 0.000145655 | 0.313521 | -3.18958 |
| Lamc1   | Lamc1-001   | 0.000750432 | 0.795581 | -1.25694 |
| Lamc2   | Lamc2-004   | 0.000436235 | 0.152901 | -6.54017 |
| Lamc2   | Lamc2-001   | 0.0017202   | 0.538664 | -1.85644 |
| Lamp2   | Lamp2-002   | 6.7935e-06  | 0.38504  | -2.59713 |
| Lamp2   | Lamp2-003   | 0.00149531  | 0.516131 | -1.93749 |
| Lancl1  | Lancl1-003  | 0.000304681 | 1.40239  | 1.40239  |
| Laptm4a | Laptm4a-001 | 0.0105834   | 0.845039 | -1.18338 |
| Large   | Large-201   | 0.00973843  | 0.682832 | -1.46449 |
| Larp1   | Larp1-003   | 0.0334001   | 1.87951  | 1.87951  |
| Larp1b  | Larp1b-201  | 0.0227324   | 0.126821 | -7.8851  |
| Larp1b  | Larp1b-012  | 0.0415503   | 0.225567 | -4.43327 |
| Larp4   | Larp4-201   | 0.04953     | 0.693677 | -1.44159 |
| Larp4b  | Larp4b-001  | 0.0264638   | 1.29972  | 1.29972  |
| Lars    | Lars-201    | 0.00219946  | 1.50443  | 1.50443  |
| Las1l   | Las1l-001   | 0.00261466  | 1.50674  | 1.50674  |
| Lasp1   | Lasp1-010   | 0.0298139   | 0.348661 | -2.86811 |
| Lasp1   | Lasp1-001   | 0.000542885 | 0.676685 | -1.47779 |
| Lats1   | Lats1-201   | 0.00231334  | 2.02632  | 2.02632  |
| Layn    | Layn-201    | 0.0253987   | 1.36621  | 1.36621  |
| Lca5    | Lca5-001    | 0.012507    | 1.31672  | 1.31672  |
| Lcmt1   | Lcmt1-201   | 0.00152348  | 1.27456  | 1.27456  |
| Ldah    | Ldah-201    | 0.00206573  | 0.516109 | -1.93758 |
| Ldb1    | Ldb1-003    | 0.0379774   | 0.494954 | -2.02039 |
| Ldha    | Ldha-008    | 0.00112927  | 2.3075   | 2.3075   |
| Ldlrad4 | Ldlrad4-201 | 0.00190408  | 0.692465 | -1.44412 |
| Leng9   | Leng9-001   | 0.0172491   | 1.58539  | 1.58539  |
| Leprot  | Leprot-001  | 0.0190255   | 0.828268 | -1.20734 |

|          |              |             |           |          |
|----------|--------------|-------------|-----------|----------|
| Leprotl1 | Leprotl1-001 | 0.011784    | 1.59698   | 1.59698  |
| Letm1    | Letm1-003    | 0.0213699   | 1.72205   | 1.72205  |
| Letmd1   | Letmd1-201   | 0.00331989  | 1.23886   | 1.23886  |
| Lfng     | Lfng-001     | 0.00212694  | 0.605774  | -1.65078 |
| Lgals1   | Lgals1-201   | 0.000680627 | 0.514183  | -1.94483 |
| Lgals3bp | Lgals3bp-001 | 2.61261e-05 | 0.775414  | -1.28963 |
| Lgals4   | Lgals4-002   | 0.000240612 | 0.0220268 | -45.3993 |
| Lgals4   | Lgals4-001   | 0.00111795  | 0.216244  | -4.6244  |
| Lgals7   | Lgals7-003   | 0.0478431   | 0.327592  | -3.05258 |
| Lgalsl   | Lgalsl-001   | 0.0250134   | 1.2119    | 1.2119   |
| Lgi3     | Lgi3-201     | 0.024302    | 1.76284   | 1.76284  |
| Lhfp     | Lhfp-002     | 0.0342609   | 492.505   | 492.505  |
| Lhfpl2   | Lhfpl2-001   | 0.00497297  | 1.99784   | 1.99784  |
| Lhfpl2   | Lhfpl2-003   | 0.000938676 | 3.29897   | 3.29897  |
| Lhfpl4   | Lhfpl4-001   | 0.00338642  | 1.41675   | 1.41675  |
| Lhx1     | Lhx1-004     | 0.0421425   | 0.274951  | -3.63701 |
| Lhx1     | Lhx1-001     | 0.0408952   | 1.52835   | 1.52835  |
| Lhx1os   | Lhx1os-002   | 0.00817127  | 4.60169   | 4.60169  |
| Lig3     | Lig3-007     | 0.0211307   | 2.26058   | 2.26058  |
| Lig3     | Lig3-011     | 0.0311107   | 2.93864   | 2.93864  |
| Lima1    | Lima1-003    | 0.0036548   | 0.532146  | -1.87919 |
| Limch1   | Limch1-019   | 0.0185849   | 1.64361   | 1.64361  |
| Limd2    | Limd2-001    | 7.88522e-05 | 0.616553  | -1.62192 |
| Limd2    | Limd2-004    | 0.00277267  | 0.774547  | -1.29108 |
| Lime1    | Lime1-001    | 0.0169944   | 0.656702  | -1.52276 |
| Limk2    | Limk2-012    | 0.0180701   | 6.49851   | 6.49851  |
| Lin54    | Lin54-004    | 0.0493849   | 0.660106  | -1.51491 |
| Lin54    | Lin54-008    | 0.040275    | 2.5578    | 2.5578   |
| Lin7c    | Lin7c-001    | 0.00350001  | 1.419     | 1.419    |
| Lincenc1 | Lincenc1-001 | 0.0413547   | 2.50638   | 2.50638  |
| Lingo1   | Lingo1-003   | 0.0145997   | 0.58644   | -1.7052  |
| Lingo3   | Lingo3-201   | 0.0452965   | 1.52298   | 1.52298  |
| Lins1    | Lins1-002    | 0.0278683   | 2.08479   | 2.08479  |
| Lipa     | Lipa-201     | 0.00906439  | 2.16099   | 2.16099  |
| Llg1     | Llg1-003     | 0.0187627   | 2.54135   | 2.54135  |
| Lman1    | Lman1-001    | 0.000265512 | 1.13817   | 1.13817  |
| Lman1    | Lman1-002    | 0.000592112 | 1.43893   | 1.43893  |
| Lman2l   | Lman2l-004   | 0.035832    | 0.572033  | -1.74815 |
| Lman2l   | Lman2l-001   | 0.00629564  | 0.735825  | -1.35902 |
| Lmbrd1   | Lmbrd1-002   | 3.84221e-05 | 0.595881  | -1.67819 |
| Lmbrd1   | Lmbrd1-004   | 0.00225593  | 2.59454   | 2.59454  |
| Lmf1     | Lmf1-005     | 0.00521779  | 1.43181   | 1.43181  |
| Lmna     | Lmna-006     | 9.83808e-05 | 0.600468  | -1.66537 |

|        |            |             |             |             |
|--------|------------|-------------|-------------|-------------|
| Lmna   | Lmna-001   | 0.00201194  | 0.65678     | -1.52258    |
| Lmntd1 | Lmntd1-003 | 0.0458075   | 0.204673    | -4.88584    |
| Lmo4   | Lmo4-005   | 0.0431651   | 3.6976      | 3.6976      |
| Lmtk2  | Lmtk2-001  | 0.026433    | 0.908966    | -1.10015    |
| Lmtk3  | Lmtk3-007  | 0.00404351  | 5.53157     | 5.53157     |
| Lmx1a  | Lmx1a-001  | 0.0306188   | 3.14358     | 3.14358     |
| Lmx1a  | Lmx1a-002  | 0.0306188   | 3.14358     | 3.14358     |
| Lnp    | Lnp-002    | 0.0326006   | 1.30638     | 1.30638     |
| Lnp    | Lnp-004    | 0.0068559   | 1.44269     | 1.44269     |
| Lonp2  | Lonp2-004  | 0.028966    | 0.462695    | -2.16125    |
| Lonrf1 | Lonrf1-201 | 0.00369472  | 1.1669      | 1.1669      |
| Loxl2  | Loxl2-001  | 0.00759052  | 0.636289    | -1.57161    |
| Loxl3  | Loxl3-001  | 0.00284616  | 0.452426    | -2.21031    |
| Loxl3  | Loxl3-002  | 0.0286842   | 36.8141     | 36.8141     |
| Lpcat1 | Lpcat1-003 | 0.0250455   | 0.729173    | -1.37142    |
| Lpcat1 | Lpcat1-002 | 0.0154066   | 3.67727     | 3.67727     |
| Lpgat1 | Lpgat1-005 | 0.0451118   | 4.15103     | 4.15103     |
| Lpin2  | Lpin2-005  | 0.000354044 | 6.80405     | 6.80405     |
| Lpin3  | Lpin3-004  | 0.0363997   | 5.90305     | 5.90305     |
| Lpp    | Lpp-201    | 0.0236574   | 0.476524    | -2.09853    |
| Lppr4  | Lppr4-003  | 0.0102098   | 4.05522     | 4.05522     |
| Lrba   | Lrba-005   | 0.0102225   | 0.275601    | -3.62843    |
| Lrch2  | Lrch2-201  | 0.0494366   | 1.21904     | 1.21904     |
| Lrch2  | Lrch2-001  | 0.049424    | 1.21905     | 1.21905     |
| Lrch2  | Lrch2-002  | 0.0344992   | 1.50851     | 1.50851     |
| Lrch4  | Lrch4-002  | 0.0133865   | 3.66023     | 3.66023     |
| Lrif1  | Lrif1-012  | 0.00241912  | 1.46569     | 1.46569     |
| Lrig2  | Lrig2-001  | 0.00269253  | 0.706228    | -1.41597    |
| Lrig2  | Lrig2-002  | 0.0381974   | 2.02241     | 2.02241     |
| Lrp1   | Lrp1-001   | 0.00925305  | 0.558834    | -1.78944    |
| Lrp10  | Lrp10-201  | 0.00215856  | 0.810658    | -1.23357    |
| Lrp11  | Lrp11-005  | 0.0411599   | 0.342899    | -2.91631    |
| Lrp6   | Lrp6-001   | 0.0368815   | 1.1004      | 1.1004      |
| Lrp8   | Lrp8-008   | 0.00590245  | 5.38064     | 5.38064     |
| Lrp8   | Lrp8-009   | 0.00111654  | 8.87622     | 8.87622     |
| Lrrc14 | Lrrc14-007 | 0.025227    | 3.87665     | 3.87665     |
| Lrrc23 | Lrrc23-004 | 0.0335535   | 2.53517     | 2.53517     |
| Lrrc28 | Lrrc28-001 | 0.0181731   | 1.99901     | 1.99901     |
| Lrrc36 | Lrrc36-001 | 0.0109032   | 2.01228     | 2.01228     |
| Lrrc4  | Lrrc4-001  | 0.0408074   | 0.688166    | -1.45314    |
| Lrrc41 | Lrrc41-003 | 0.0380842   | 9.66127e+08 | 9.66127e+08 |
| Lrrc45 | Lrrc45-003 | 0.0131019   | 3.01992     | 3.01992     |
| Lrrc51 | Lrrc51-003 | 0.0132322   | 3.65854     | 3.65854     |

|         |             |             |          |          |
|---------|-------------|-------------|----------|----------|
| Lrrc55  | Lrrc55-202  | 0.00532898  | 1.73291  | 1.73291  |
| Lrrc61  | Lrrc61-003  | 0.0228779   | 1.75674  | 1.75674  |
| Lrrc8b  | Lrrc8b-001  | 0.00132739  | 0.701758 | -1.42499 |
| Lrrc8c  | Lrrc8c-001  | 0.000570566 | 0.595356 | -1.67967 |
| Lrrc8c  | Lrrc8c-004  | 0.036495    | 2.75003  | 2.75003  |
| Lrrcc1  | Lrrcc1-002  | 0.0258333   | 1.70009  | 1.70009  |
| Lrrfip2 | Lrrfip2-005 | 0.000114749 | 1.67722  | 1.67722  |
| Lrriq3  | Lrriq3-002  | 0.0171989   | 3.25169  | 3.25169  |
| Lrwd1   | Lrwd1-008   | 0.0492048   | 11.2375  | 11.2375  |
| Lsg1    | Lsg1-004    | 0.011836    | 1.5669   | 1.5669   |
| Lsg1    | Lsg1-006    | 0.0375248   | 1.63751  | 1.63751  |
| Lsg1    | Lsg1-007    | 0.000714365 | 3.55807  | 3.55807  |
| Lsg1    | Lsg1-002    | 0.000114839 | 3.60169  | 3.60169  |
| Lsm11   | Lsm11-001   | 0.000820288 | 0.672083 | -1.48791 |
| Lsm11   | Lsm11-002   | 0.0316901   | 1.97145  | 1.97145  |
| Lsm12   | Lsm12-001   | 0.00425132  | 1.20703  | 1.20703  |
| Lsm14a  | Lsm14a-006  | 0.00105409  | 1.20138  | 1.20138  |
| Lsm2    | Lsm2-008    | 0.0135002   | 0.117807 | -8.48847 |
| Lsm6    | Lsm6-004    | 0.045471    | 1.42995  | 1.42995  |
| Lsp1    | Lsp1-005    | 0.0222019   | 0.739759 | -1.35179 |
| Lsp1    | Lsp1-012    | 0.0242721   | 4.74567  | 4.74567  |
| Lss     | Lss-005     | 0.0460115   | 274.26   | 274.26   |
| Lta4h   | Lta4h-201   | 0.000362732 | 1.21137  | 1.21137  |
| Ltbp2   | Ltbp2-001   | 0.0484046   | 0.30286  | -3.30186 |
| Ltbp3   | Ltbp3-201   | 1.66848e-05 | 0.596902 | -1.67532 |
| Ltbp4   | Ltbp4-002   | 0.000261989 | 0.491382 | -2.03508 |
| Ltbp4   | Ltbp4-201   | 0.00136813  | 0.518694 | -1.92792 |
| Ltbp4   | Ltbp4-001   | 0.0108519   | 0.530276 | -1.88581 |
| Luc7l   | Luc7l-009   | 0.00181315  | 77.2425  | 77.2425  |
| Luc7l3  | Luc7l3-009  | 0.0197353   | 1.6789   | 1.6789   |
| Lurap1  | Lurap1-001  | 0.00954509  | 2.10877  | 2.10877  |
| Luzp4   | Luzp4-001   | 0.0374668   | 0.588516 | -1.69919 |
| Ly6g5b  | Ly6g5b-001  | 0.0494098   | 0.297663 | -3.3595  |
| Ly6g6c  | Ly6g6c-001  | 0.0355502   | 0.406091 | -2.4625  |
| Ly75    | Ly75-001    | 0.00923705  | 0.713801 | -1.40095 |
| Lyar    | Lyar-010    | 0.0128597   | 2.01064  | 2.01064  |
| Lypla1  | Lypla1-001  | 0.010006    | 1.26657  | 1.26657  |
| Lypla2  | Lypla2-002  | 0.00255614  | 0.586141 | -1.70607 |
| Lypla2  | Lypla2-001  | 0.0320404   | 0.796393 | -1.25566 |
| Lypla2  | Lypla2-005  | 0.00279788  | 1.97449  | 1.97449  |
| Lyplal1 | Lyplal1-001 | 0.0274962   | 1.31281  | 1.31281  |
| Lyplal1 | Lyplal1-002 | 0.021953    | 3.74649  | 3.74649  |
| Lym4    | Lym4-201    | 0.0111596   | 1.36785  | 1.36785  |

|          |              |             |           |          |
|----------|--------------|-------------|-----------|----------|
| Lyrn5    | Lyrn5-003    | 0.0258718   | 15.5682   | 15.5682  |
| Lyrn7    | Lyrn7-002    | 0.0354751   | 7.26886   | 7.26886  |
| Lyrn7    | Lyrn7-001    | 0.0415665   | 14.0034   | 14.0034  |
| Lyrn9    | Lyrn9-001    | 0.000149626 | 1.40931   | 1.40931  |
| Lysmd3   | Lysmd3-201   | 0.00111047  | 1.22588   | 1.22588  |
| Lztf1    | Lztf1-006    | 0.0153856   | 1.96885   | 1.96885  |
| Lztr1    | Lztr1-201    | 0.00339029  | 0.797738  | -1.25354 |
| Lztr1    | Lztr1-002    | 0.0146059   | 1.63609   | 1.63609  |
| Lzts3    | Lzts3-001    | 0.0250067   | 0.335364  | -2.98184 |
| Macf1    | Macf1-002    | 0.0145518   | 0.466444  | -2.14388 |
| Macf1    | Macf1-008    | 0.0010563   | 0.692178  | -1.44471 |
| Mad1l1   | Mad1l1-003   | 0.0106748   | 11.9904   | 11.9904  |
| Madcam1  | Madcam1-201  | 0.00111837  | 0.199651  | -5.00873 |
| Madd     | Madd-021     | 0.0373831   | 0.725869  | -1.37766 |
| Mafb     | Mafb-001     | 0.00777419  | 0.575939  | -1.73629 |
| Mafg     | Mafg-004     | 0.0272502   | 1.34292   | 1.34292  |
| Mafg     | Mafg-005     | 0.00372311  | 1.54223   | 1.54223  |
| Magea2   | Magea2-201   | 0.0237188   | 10.5832   | 10.5832  |
| Mageh1   | Mageh1-001   | 0.00142205  | 1.23837   | 1.23837  |
| Magel2   | Magel2-201   | 0.0470162   | 1.65401   | 1.65401  |
| Magi1    | Magi1-201    | 0.0203583   | 0.374054  | -2.67341 |
| Magohb   | Magohb-005   | 0.0473283   | 0.710682  | -1.4071  |
| Malsu1   | Malsu1-003   | 0.00373964  | 1.37784   | 1.37784  |
| Malsu1   | Malsu1-004   | 0.010014    | 1.71808   | 1.71808  |
| Maml2    | Maml2-002    | 0.0381372   | 0.0635759 | -15.7292 |
| Maml2    | Maml2-001    | 0.00557514  | 0.744446  | -1.34328 |
| Man1a2   | Man1a2-006   | 0.0175493   | 1.78218   | 1.78218  |
| Man1b1   | Man1b1-001   | 0.0103139   | 1.18084   | 1.18084  |
| Man1c1   | Man1c1-001   | 0.000557859 | 0.546593  | -1.82952 |
| Man1c1   | Man1c1-201   | 0.00656831  | 0.552617  | -1.80957 |
| Man2b1   | Man2b1-201   | 0.00205562  | 0.698312  | -1.43202 |
| Man2c1   | Man2c1-019   | 0.0415496   | 0.630455  | -1.58616 |
| Man2c1   | Man2c1-011   | 0.0010096   | 2.04923   | 2.04923  |
| Man2c1   | Man2c1-017   | 0.00474036  | 2.88808   | 2.88808  |
| Manba    | Manba-002    | 0.0310074   | 0.236073  | -4.23598 |
| Manba    | Manba-001    | 0.0218724   | 0.763578  | -1.30962 |
| Manbal   | Manbal-001   | 0.000421878 | 1.32159   | 1.32159  |
| Manf     | Manf-003     | 0.0336636   | 2.88187   | 2.88187  |
| Map1a    | Map1a-002    | 0.000232557 | 0.898941  | -1.11242 |
| Map1lc3b | Map1lc3b-001 | 0.0232193   | 0.848212  | -1.17895 |
| Map1lc3b | Map1lc3b-003 | 0.0277485   | 1.34455   | 1.34455  |
| Map2     | Map2-010     | 0.00977316  | 2.13852   | 2.13852  |
| Map2     | Map2-018     | 0.00726081  | 28.7954   | 28.7954  |

|           |               |             |             |          |
|-----------|---------------|-------------|-------------|----------|
| Map3k10   | Map3k10-004   | 0.0438787   | 5.43313     | 5.43313  |
| Map3k13   | Map3k13-201   | 0.00186161  | 1.69832     | 1.69832  |
| Map3k2    | Map3k2-201    | 0.00297042  | 1.27215     | 1.27215  |
| Map3k3    | Map3k3-001    | 1.35369e-05 | 0.523464    | -1.91035 |
| Map3k5    | Map3k5-007    | 0.00882876  | 0.000430453 | -2323.13 |
| Map3k5    | Map3k5-001    | 0.00647784  | 0.707678    | -1.41307 |
| Map3k6    | Map3k6-001    | 0.0142646   | 0.611719    | -1.63474 |
| Map3k7    | Map3k7-003    | 0.0134884   | 0.539942    | -1.85205 |
| Map4      | Map4-006      | 0.0149474   | 0.152686    | -6.54938 |
| Map4k1    | Map4k1-201    | 0.0013053   | 0.621215    | -1.60975 |
| Map4k3    | Map4k3-201    | 0.0124176   | 1.27753     | 1.27753  |
| Map4k4    | Map4k4-019    | 0.000147169 | 0.56445     | -1.77163 |
| Map4k4    | Map4k4-201    | 0.0170952   | 0.667835    | -1.49738 |
| Map4k4    | Map4k4-002    | 0.0065761   | 1.62831     | 1.62831  |
| Map4k4    | Map4k4-004    | 0.00565242  | 3.35046     | 3.35046  |
| Map4k5    | Map4k5-202    | 0.0297934   | 2.48702     | 2.48702  |
| Map6      | Map6-004      | 0.000554131 | 0.625796    | -1.59796 |
| Map6      | Map6-002      | 0.000186984 | 0.67123     | -1.4898  |
| Map6d1    | Map6d1-201    | 3.23535e-06 | 2.55383     | 2.55383  |
| Map7d2    | Map7d2-003    | 0.0181      | 1.3467      | 1.3467   |
| Map7d2    | Map7d2-001    | 0.000348634 | 1.40675     | 1.40675  |
| Map7d2    | Map7d2-002    | 0.00152615  | 1.69157     | 1.69157  |
| Map9      | Map9-001      | 0.0222285   | 1.2327      | 1.2327   |
| Mapk1     | Mapk1-001     | 8.40348e-08 | 0.489313    | -2.04368 |
| Mapk1     | Mapk1-006     | 0.00204388  | 12.7439     | 12.7439  |
| Mapk10    | Mapk10-003    | 0.0333236   | 0.279128    | -3.58259 |
| Mapk10    | Mapk10-001    | 0.0448075   | 0.673464    | -1.48486 |
| Mapk10    | Mapk10-006    | 0.0122734   | 1.79136     | 1.79136  |
| Mapk11    | Mapk11-201    | 0.017035    | 0.684516    | -1.46089 |
| Mapk12    | Mapk12-201    | 4.47171e-05 | 0.749731    | -1.33381 |
| Mapk15    | Mapk15-001    | 0.00260222  | 4.01816     | 4.01816  |
| Mapk1ip1l | Mapk1ip1l-201 | 0.00173369  | 0.540389    | -1.85052 |
| Mapk6     | Mapk6-001     | 0.0492188   | 0.81826     | -1.2221  |
| Mapk8     | Mapk8-001     | 0.00437639  | 0.67851     | -1.47382 |
| Mapk8     | Mapk8-009     | 0.0319916   | 1.76563     | 1.76563  |
| Mapk8     | Mapk8-003     | 0.00081022  | 4.92344     | 4.92344  |
| Mapk8ip1  | Mapk8ip1-001  | 0.000191948 | 1.1981      | 1.1981   |
| Mapk8ip3  | Mapk8ip3-012  | 0.0311293   | 0.000183473 | -5450.39 |
| Mapk8ip3  | Mapk8ip3-001  | 0.0472788   | 0.703881    | -1.4207  |
| Mapk8ip3  | Mapk8ip3-004  | 0.0450412   | 0.782365    | -1.27818 |
| Mapk9     | Mapk9-202     | 0.0398877   | 0.760033    | -1.31573 |
| Mapk9     | Mapk9-002     | 0.000463415 | 1.92113     | 1.92113  |
| Mapkap1   | Mapkap1-004   | 0.00119731  | 4.84396     | 4.84396  |

|          |              |             |             |             |
|----------|--------------|-------------|-------------|-------------|
| Mapkapk2 | Mapkapk2-001 | 1.42712e-07 | 0.441153    | -2.26679    |
| Mapkapk3 | Mapkapk3-004 | 0.0279726   | 4.44331e+07 | 4.44331e+07 |
| Mapre2   | Mapre2-201   | 0.0412709   | 0.043328    | -23.0798    |
| Mapre2   | Mapre2-001   | 0.00914827  | 0.797588    | -1.25378    |
| Mapre2   | Mapre2-006   | 0.0159764   | 1.36605     | 1.36605     |
| Mapt     | Mapt-003     | 0.0270963   | 0.538758    | -1.85612    |
| Marc2    | Marc2-003    | 0.0339746   | 1.40979     | 1.40979     |
| March3   | March3-002   | 0.00346757  | 0.488394    | -2.04753    |
| March4   | March4-001   | 0.0460567   | 0.638625    | -1.56586    |
| March6   | March6-201   | 0.00224324  | 1.19872     | 1.19872     |
| March7   | March7-003   | 0.0346976   | 2.33423     | 2.33423     |
| March7   | March7-201   | 0.0391323   | 2.79639     | 2.79639     |
| March11  | March11-002  | 0.00288529  | 0.473344    | -2.11263    |
| Mark2    | Mark2-015    | 0.00838779  | 2.66879     | 2.66879     |
| Mark3    | Mark3-202    | 0.017074    | 0.832893    | -1.20063    |
| Mark4    | Mark4-201    | 0.0143405   | 0.790878    | -1.26442    |
| Mars     | Mars-001     | 0.0481479   | 1.39066     | 1.39066     |
| Masp1    | Masp1-201    | 0.000577414 | 2.0517      | 2.0517      |
| Mat2a    | Mat2a-002    | 0.000565247 | 1.18484     | 1.18484     |
| Mat2a    | Mat2a-003    | 0.0075937   | 4.51313     | 4.51313     |
| Mat2b    | Mat2b-001    | 0.0499678   | 0.511688    | -1.95432    |
| Mat2b    | Mat2b-002    | 0.0103313   | 0.639391    | -1.56399    |
| Matr3    | Matr3-010    | 0.0469791   | 0.517719    | -1.93155    |
| Matr3    | Matr3-003    | 0.0452934   | 4.12622     | 4.12622     |
| Max      | Max-201      | 0.00833169  | 1.37292     | 1.37292     |
| Mbd4     | Mbd4-001     | 0.0141558   | 1.31048     | 1.31048     |
| Mbd4     | Mbd4-004     | 0.0115456   | 1.47315     | 1.47315     |
| Mbd4     | Mbd4-003     | 0.0142662   | 1.53087     | 1.53087     |
| Mbd5     | Mbd5-010     | 0.0224392   | 2.41781     | 2.41781     |
| Mbd6     | Mbd6-001     | 0.0495209   | 1.25771     | 1.25771     |
| Mblac2   | Mblac2-201   | 0.0307252   | 0.726763    | -1.37596    |
| Mbnl1    | Mbnl1-018    | 0.0412231   | 0.123207    | -8.11642    |
| Mbnl1    | Mbnl1-002    | 0.0411405   | 0.318889    | -3.13589    |
| Mboat4   | Mboat4-201   | 4.60001e-05 | 2.68888     | 2.68888     |
| Mboat7   | Mboat7-001   | 0.00187633  | 0.754475    | -1.32543    |
| Mbtd1    | Mbtd1-012    | 0.0196297   | 0.292072    | -3.42382    |
| Mbtd1    | Mbtd1-002    | 0.00462903  | 0.450962    | -2.21748    |
| Mbtps2   | Mbtps2-001   | 6.48658e-05 | 0.533787    | -1.87341    |
| Mbtps2   | Mbtps2-003   | 0.0479008   | 1.61792     | 1.61792     |
| Mbtps2   | Mbtps2-201   | 0.0478973   | 1.61793     | 1.61793     |
| Mbtps2   | Mbtps2-004   | 7.53858e-05 | 1.70829     | 1.70829     |
| Mbtps2   | Mbtps2-005   | 0.0373971   | 3.46783     | 3.46783     |
| Mcam     | Mcam-001     | 0.00125755  | 0.684001    | -1.46199    |



|        |            |             |             |          |
|--------|------------|-------------|-------------|----------|
| Mcee   | Mcee-004   | 0.0447482   | 0.0641984   | -15.5767 |
| Mcee   | Mcee-001   | 0.00622859  | 1.42561     | 1.42561  |
| Mcomp1 | Mcomp1-201 | 0.0285255   | 2.18482     | 2.18482  |
| Mcf2l  | Mcf2l-013  | 0.0263829   | 3.39428     | 3.39428  |
| Mcfd2  | Mcfd2-001  | 0.0177856   | 0.80393     | -1.24389 |
| Mcm8   | Mcm8-002   | 0.00211431  | 1.55415     | 1.55415  |
| Mcmbp  | Mcmbp-002  | 0.019148    | 1.30756     | 1.30756  |
| Mcoln1 | Mcoln1-001 | 0.0270023   | 0.847992    | -1.17926 |
| Mcoln1 | Mcoln1-007 | 0.025689    | 1.39833     | 1.39833  |
| Mcoln3 | Mcoln3-001 | 0.037941    | 0.745289    | -1.34176 |
| Mcph1  | Mcph1-004  | 0.00336089  | 2.14883     | 2.14883  |
| Mcrs1  | Mcrs1-201  | 0.0401329   | 1.17411     | 1.17411  |
| Mcts1  | Mcts1-003  | 0.00914251  | 0.305699    | -3.2712  |
| Mcts2  | Mcts2-001  | 0.0242186   | 1.23706     | 1.23706  |
| Mcu    | Mcu-001    | 0.00894275  | 1.28228     | 1.28228  |
| Mcu    | Mcu-003    | 0.0473897   | 2.32778     | 2.32778  |
| Mdfi   | Mdfi-008   | 0.0354901   | 85.3423     | 85.3423  |
| Mdh1b  | Mdh1b-001  | 0.0173428   | 6.83268     | 6.83268  |
| Mdk    | Mdk-003    | 0.0351411   | 0.384955    | -2.59771 |
| Mdm2   | Mdm2-003   | 0.000484773 | 1.41174     | 1.41174  |
| Mdm2   | Mdm2-002   | 0.00205274  | 1.80995     | 1.80995  |
| Mdp1   | Mdp1-201   | 0.00346316  | 1.36868     | 1.36868  |
| Me1    | Me1-001    | 0.0210381   | 1.3572      | 1.3572   |
| Me1    | Me1-003    | 0.00143838  | 1.51548     | 1.51548  |
| Mea1   | Mea1-201   | 0.0263917   | 1.21889     | 1.21889  |
| Mecp2  | Mecp2-201  | 0.0306421   | 0.63129     | -1.58406 |
| Mecp2  | Mecp2-003  | 0.0159192   | 2.25596     | 2.25596  |
| Mecp2  | Mecp2-002  | 0.0240581   | 2.32219     | 2.32219  |
| Mecr   | Mecr-001   | 0.013432    | 1.6769      | 1.6769   |
| Med1   | Med1-004   | 0.00926629  | 2.03198     | 2.03198  |
| Med1   | Med1-002   | 0.0296356   | 2.83899     | 2.83899  |
| Med13  | Med13-002  | 7.57363e-05 | 3.04677e-05 | -32821.6 |
| Med13  | Med13-003  | 0.039603    | 65.2491     | 65.2491  |
| Med16  | Med16-001  | 0.0233189   | 1.28597     | 1.28597  |
| Med23  | Med23-006  | 0.0286085   | 1.37622     | 1.37622  |
| Med23  | Med23-004  | 7.63948e-05 | 2.44288     | 2.44288  |
| Med24  | Med24-009  | 0.00144838  | 1.81831     | 1.81831  |
| Med28  | Med28-001  | 0.0241819   | 0.589092    | -1.69753 |
| Med30  | Med30-201  | 0.00346242  | 1.30786     | 1.30786  |
| Med31  | Med31-002  | 0.00174972  | 0.493604    | -2.02592 |
| Med31  | Med31-001  | 0.0185677   | 1.33285     | 1.33285  |
| Med8   | Med8-008   | 0.000167564 | 8.85812     | 8.85812  |
| Med9os | Med9os-003 | 0.0310589   | 1.47009     | 1.47009  |

|          |              |             |           |          |
|----------|--------------|-------------|-----------|----------|
| Medag    | Medag-003    | 0.0341358   | 0.583743  | -1.71308 |
| Mef2a    | Mef2a-002    | 0.000189258 | 0.478129  | -2.09148 |
| Mef2a    | Mef2a-004    | 0.00808313  | 0.548218  | -1.82409 |
| Mef2b    | Mef2b-005    | 0.0234003   | 2.07559   | 2.07559  |
| Mef2d    | Mef2d-001    | 0.0118134   | 0.711675  | -1.40514 |
| Mef2d    | Mef2d-002    | 0.0308065   | 1.23983   | 1.23983  |
| Megf10   | Megf10-001   | 0.00345813  | 0.425177  | -2.35196 |
| Megf8    | Megf8-002    | 0.000779824 | 0.575668  | -1.73711 |
| Megf8    | Megf8-001    | 0.000725771 | 0.683025  | -1.46408 |
| Meis1    | Meis1-006    | 0.000247401 | 1.63274   | 1.63274  |
| Meis2    | Meis2-011    | 0.017462    | 0.560885  | -1.7829  |
| Meis3    | Meis3-010    | 0.0341671   | 3.69229   | 3.69229  |
| Melk     | Melk-001     | 0.00295696  | 0.679773  | -1.47108 |
| Mepce    | Mepce-002    | 0.0445426   | 0.466882  | -2.14187 |
| Metap1d  | Metap1d-004  | 0.0304311   | 2.0764    | 2.0764   |
| Metap2   | Metap2-002   | 0.00763259  | 0.355788  | -2.81066 |
| Metap2   | Metap2-001   | 0.00150272  | 0.50636   | -1.97488 |
| Metap2   | Metap2-014   | 0.0181032   | 67.7055   | 67.7055  |
| Metap2   | Metap2-012   | 8.83982e-05 | 3453.96   | 3453.96  |
| Metrn    | Metrn-201    | 0.0037689   | 0.493591  | -2.02597 |
| Metrn    | Metrn-202    | 0.0168364   | 0.586634  | -1.70464 |
| Mettl14  | Mettl14-001  | 0.00138513  | 1.23158   | 1.23158  |
| Mettl14  | Mettl14-002  | 0.00410196  | 4.65061   | 4.65061  |
| Mettl15  | Mettl15-001  | 0.000528673 | 1.49377   | 1.49377  |
| Mettl21b | Mettl21b-001 | 0.0171572   | 1.46963   | 1.46963  |
| Mettl21c | Mettl21c-002 | 0.0297622   | 5.52341   | 5.52341  |
| Mettl24  | Mettl24-001  | 0.0295324   | 1.64673   | 1.64673  |
| Mettl3   | Mettl3-001   | 0.0267516   | 1.25213   | 1.25213  |
| Mettl4   | Mettl4-201   | 0.00199269  | 1.53791   | 1.53791  |
| Mex3a    | Mex3a-001    | 0.00889401  | 0.50278   | -1.98894 |
| Mex3c    | Mex3c-001    | 0.00022351  | 0.572423  | -1.74696 |
| Mex3d    | Mex3d-002    | 0.0249193   | 0.33651   | -2.97168 |
| Mfap1b   | Mfap1b-001   | 0.0398032   | 1.32209   | 1.32209  |
| Mfap2    | Mfap2-001    | 0.00103652  | 0.547352  | -1.82698 |
| Mff      | Mff-010      | 0.0371269   | 10.3437   | 10.3437  |
| Mfng     | Mfng-003     | 0.0221639   | 3.15553   | 3.15553  |
| Mfrp     | Mfrp-005     | 0.00128638  | 0.0634086 | -15.7707 |
| Mfsd11   | Mfsd11-003   | 0.0214874   | 0.0517758 | -19.314  |
| Mfsd11   | Mfsd11-004   | 0.0315332   | 0.596092  | -1.67759 |
| Mfsd12   | Mfsd12-001   | 0.000923807 | 0.59571   | -1.67867 |
| Mfsd6    | Mfsd6-001    | 0.0462429   | 0.820412  | -1.2189  |
| Mfsd6    | Mfsd6-004    | 0.00493552  | 2.28031   | 2.28031  |
| Mfsd7b   | Mfsd7b-005   | 0.0116454   | 2.04726   | 2.04726  |

|             |                 |             |             |              |
|-------------|-----------------|-------------|-------------|--------------|
| Mfsd8       | Mfsd8-001       | 0.0217927   | 0.802888    | -1.2455      |
| Mga         | Mga-004         | 0.0296918   | 5.68082e-08 | -1.76031e+07 |
| Mgat1       | Mgat1-003       | 0.02224     | 3.51508     | 3.51508      |
| Mgat1       | Mgat1-012       | 0.00654767  | 7.6418      | 7.6418       |
| Mgat3       | Mgat3-201       | 0.0267357   | 0.850761    | -1.17542     |
| Mgat4a      | Mgat4a-003      | 0.0295278   | 5.4629e-10  | -1.83053e+09 |
| Mgat4b      | Mgat4b-003      | 0.0289231   | 1.33432     | 1.33432      |
| Mgat4b      | Mgat4b-002      | 0.0113143   | 4.90287     | 4.90287      |
| Mgat5       | Mgat5-001       | 0.00167492  | 0.728346    | -1.37297     |
| Mia3        | Mia3-004        | 0.0224619   | 0.687153    | -1.45528     |
| Mia3        | Mia3-201        | 0.032144    | 0.696192    | -1.43639     |
| Mia3        | Mia3-001        | 0.00168766  | 0.715151    | -1.39831     |
| Mia3        | Mia3-003        | 0.00462106  | 0.720293    | -1.38832     |
| Mia3        | Mia3-002        | 0.0406426   | 0.832796    | -1.20077     |
| Mib1        | Mib1-001        | 0.000985699 | 1.35803     | 1.35803      |
| Mib1        | Mib1-201        | 0.0129319   | 1.98033     | 1.98033      |
| Mib2        | Mib2-001        | 0.0421127   | 1.3214      | 1.3214       |
| Mib2        | Mib2-002        | 0.0194589   | 1.74022     | 1.74022      |
| Mib2        | Mib2-003        | 0.0280742   | 2.95882     | 2.95882      |
| Mical2      | Mical2-005      | 0.0111357   | 0.307212    | -3.25508     |
| Mical2      | Mical2-001      | 0.0183493   | 0.560837    | -1.78305     |
| Mical3      | Mical3-013      | 0.0480513   | 0.301496    | -3.31679     |
| Micall2     | Micall2-003     | 0.00390072  | 0.154917    | -6.45508     |
| Micall2     | Micall2-006     | 0.00104184  | 0.162479    | -6.15466     |
| Micall2     | Micall2-001     | 0.000637652 | 0.396049    | -2.52494     |
| Micu1       | Micu1-001       | 0.0393213   | 1.48829     | 1.48829      |
| Micu1       | Micu1-003       | 0.0198585   | 1.74127     | 1.74127      |
| Micu1       | Micu1-011       | 0.0307047   | 374445      | 374445       |
| Mid1ip1     | Mid1ip1-002     | 0.00289448  | 1.51292     | 1.51292      |
| Mid1ip1     | Mid1ip1-001     | 0.0338139   | 1.92889     | 1.92889      |
| Mid2        | Mid2-201        | 0.0290866   | 0.668293    | -1.49635     |
| Midn        | Midn-001        | 0.0408191   | 0.803784    | -1.24412     |
| Mien1       | Mien1-001       | 0.00657282  | 1.17975     | 1.17975      |
| Mier2       | Mier2-201       | 0.021411    | 0.209743    | -4.76775     |
| Mier2       | Mier2-002       | 0.0194342   | 1.33178     | 1.33178      |
| Mier2       | Mier2-003       | 0.000444915 | 5.13571     | 5.13571      |
| Miip        | Miip-005        | 0.0140162   | 0.714211    | -1.40015     |
| Milr1       | Milr1-004       | 0.0171805   | 0.192175    | -5.2036      |
| Milr1       | Milr1-006       | 0.0073711   | 0.234688    | -4.26097     |
| Milr1       | Milr1-001       | 0.0345067   | 0.542791    | -1.84233     |
| Mipep       | Mipep-201       | 9.6687e-05  | 1.48529     | 1.48529      |
| Mipol1      | Mipol1-006      | 0.0126869   | 2.04348     | 2.04348      |
| Mir124a-1hg | Mir124a-1hg-001 | 0.00722173  | 1.45207     | 1.45207      |

|              |                    |             |          |          |
|--------------|--------------------|-------------|----------|----------|
| Mir6955      | Mir6955-201        | 0.00608952  | 7.81375  | 7.81375  |
| Mirg         | Mirg-002           | 0.0230607   | 0.28956  | -3.45352 |
| Mis18a       | Mis18a-002         | 0.0217111   | 0.570077 | -1.75415 |
| Mitd1        | Mitd1-001          | 0.019492    | 1.33682  | 1.33682  |
| Mitf         | Mitf-001           | 0.000959372 | 1.72086  | 1.72086  |
| Mkks         | Mkks-003           | 0.00833998  | 1.35028  | 1.35028  |
| Mkln1        | Mkln1-001          | 0.00222962  | 0.724694 | -1.37989 |
| Mkln1        | Mkln1-005          | 0.0221657   | 1.23983  | 1.23983  |
| Mkln1        | Mkln1-010          | 0.0304406   | 1.24125  | 1.24125  |
| Mknk1        | Mknk1-001          | 0.0055684   | 1.49888  | 1.49888  |
| Mknk1        | Mknk1-013          | 0.00629487  | 1.79548  | 1.79548  |
| Mknk1        | Mknk1-002          | 0.023553    | 1.8842   | 1.8842   |
| Mknk1        | Mknk1-003          | 0.0314985   | 4.44015  | 4.44015  |
| Mknk2        | Mknk2-201          | 0.00283429  | 0.54045  | -1.85031 |
| Mkrn1        | Mkrn1-001          | 0.0163032   | 1.15852  | 1.15852  |
| Mkrn1        | Mkrn1-002          | 0.0052794   | 3.23367  | 3.23367  |
| Mkrn2        | Mkrn2-001          | 0.00953429  | 1.19178  | 1.19178  |
| Mkrn3        | Mkrn3-201          | 0.000807457 | 1.42645  | 1.42645  |
| Mkx          | Mkx-001            | 0.0238791   | 1.48552  | 1.48552  |
| Mkx          | Mkx-005            | 0.045743    | 8.97341  | 8.97341  |
| Mlh3         | Mlh3-201           | 0.0152593   | 1.34689  | 1.34689  |
| Mlh3         | Mlh3-202           | 0.0110784   | 1.35521  | 1.35521  |
| Mlkl         | Mlkl-001           | 0.0298893   | 1.65579  | 1.65579  |
| Mllt10       | Mllt10-002         | 0.012278    | 1.54057  | 1.54057  |
| Mllt11       | Mllt11-003         | 0.0446774   | 22.364   | 22.364   |
| Mllt6        | Mllt6-004          | 0.000204008 | 0.809971 | -1.23461 |
| Mlx          | Mlx-001            | 0.00389022  | 1.81767  | 1.81767  |
| Mmaa         | Mmaa-201           | 0.00141104  | 2.32635  | 2.32635  |
| Mmadhc       | Mmadhc-001         | 0.000129205 | 1.32897  | 1.32897  |
| Mmd          | Mmd-001            | 0.0184137   | 0.802068 | -1.24678 |
| Mmd          | Mmd-004            | 0.0054543   | 1.97475  | 1.97475  |
| Mmp23        | Mmp23-001          | 0.00175962  | 0.385772 | -2.5922  |
| Mmp24        | Mmp24-001          | 0.0272919   | 1.19981  | 1.19981  |
| Mmp9         | Mmp9-001           | 0.00172422  | 0.150799 | -6.63136 |
| mmu-mir-1291 | mmu-mir-1291.1-201 | 0.0343506   | 0.255377 | -3.91578 |
| Mob1a        | Mob1a-002          | 0.00708015  | 0.575589 | -1.73735 |
| Mob1b        | Mob1b-004          | 0.0337371   | 2.51929  | 2.51929  |
| Mob3a        | Mob3a-201          | 0.0249034   | 0.781625 | -1.27939 |
| Mob3c        | Mob3c-001          | 0.0378349   | 1.26517  | 1.26517  |
| Mocs2        | Mocs2-002          | 0.00740739  | 1.72674  | 1.72674  |
| Morc3        | Morc3-001          | 0.000377559 | 1.59585  | 1.59585  |
| Morc3        | Morc3-201          | 0.000800153 | 1.60332  | 1.60332  |
| Morc3        | Morc3-004          | 0.0360913   | 3.21316  | 3.21316  |

|          |              |             |            |          |
|----------|--------------|-------------|------------|----------|
| Morc3    | Morc3-005    | 5.7547e-05  | 4.53978    | 4.53978  |
| Morf4l2  | Morf4l2-003  | 0.00133589  | 1.20804    | 1.20804  |
| Morf4l2  | Morf4l2-001  | 0.00739224  | 1.2587     | 1.2587   |
| Morf4l2  | Morf4l2-201  | 0.0145084   | 1.31415    | 1.31415  |
| Morf4l2  | Morf4l2-204  | 0.0104416   | 1.45248    | 1.45248  |
| Morn2    | Morn2-201    | 0.00725254  | 1.62395    | 1.62395  |
| Mospd2   | Mospd2-002   | 0.0231268   | 1.36088    | 1.36088  |
| Mov10    | Mov10-005    | 0.0432911   | 7850.74    | 7850.74  |
| Mpc2     | Mpc2-003     | 0.0233701   | 1.50425    | 1.50425  |
| Mphosph6 | Mphosph6-201 | 0.0012769   | 1.29213    | 1.29213  |
| Mplkip   | Mplkip-201   | 0.0279044   | 1.20801    | 1.20801  |
| Mpnd     | Mpnd-001     | 0.0293513   | 0.596968   | -1.67513 |
| Mpp3     | Mpp3-008     | 0.0372793   | 1.6142     | 1.6142   |
| Mpp4     | Mpp4-001     | 0.0222627   | 0.00014441 | -6924.74 |
| Mpp5     | Mpp5-201     | 7.47308e-07 | 1.3755     | 1.3755   |
| Mpp6     | Mpp6-003     | 0.0159121   | 1.49667    | 1.49667  |
| Mpp6     | Mpp6-002     | 0.00160119  | 1.51302    | 1.51302  |
| Mprip    | Mprip-001    | 0.00450342  | 0.634263   | -1.57663 |
| Mprip    | Mprip-003    | 0.0274513   | 0.775423   | -1.28962 |
| Mpst     | Mpst-203     | 0.0390088   | 0.511056   | -1.95673 |
| Mpv17l   | Mpv17l-001   | 0.0250418   | 0.379621   | -2.63421 |
| Mpv17l   | Mpv17l-002   | 0.00502139  | 1.46387    | 1.46387  |
| Mpv17l2  | Mpv17l2-201  | 0.0271082   | 0.750447   | -1.33254 |
| Mpzl1    | Mpzl1-001    | 0.0110129   | 0.683712   | -1.4626  |
| Mpzl1    | Mpzl1-002    | 0.00438961  | 1.44664    | 1.44664  |
| Mpzl1    | Mpzl1-006    | 0.0298018   | 163.029    | 163.029  |
| Mrap2    | Mrap2-003    | 0.0274751   | 1.76966    | 1.76966  |
| Mrc2     | Mrc2-005     | 0.0288654   | 0.0118663  | -84.272  |
| Mre11a   | Mre11a-001   | 0.000299186 | 1.48109    | 1.48109  |
| Mrgprx2  | Mrgprx2-001  | 0.00104715  | 0.544761   | -1.83567 |
| Mroh1    | Mroh1-008    | 0.0449598   | 1.78096    | 1.78096  |
| Mrpl1    | Mrpl1-002    | 5.56097e-05 | 1.63386    | 1.63386  |
| Mrpl10   | Mrpl10-002   | 0.0403639   | 2.22588    | 2.22588  |
| Mrpl13   | Mrpl13-003   | 0.0368477   | 1.32372    | 1.32372  |
| Mrpl15   | Mrpl15-006   | 0.0214076   | 1.24315    | 1.24315  |
| Mrpl24   | Mrpl24-005   | 0.00501438  | 1.51275    | 1.51275  |
| Mrpl27   | Mrpl27-001   | 0.00654761  | 1.32707    | 1.32707  |
| Mrpl30   | Mrpl30-007   | 0.00837964  | 1.20503    | 1.20503  |
| Mrpl30   | Mrpl30-008   | 0.000677242 | 1.47528    | 1.47528  |
| Mrpl32   | Mrpl32-201   | 0.000135741 | 1.27565    | 1.27565  |
| Mrpl33   | Mrpl33-006   | 0.0373977   | 1.55141    | 1.55141  |
| Mrpl33   | Mrpl33-003   | 0.0107912   | 1.86462    | 1.86462  |
| Mrpl35   | Mrpl35-001   | 0.0385378   | 1.226      | 1.226    |

|         |             |             |            |          |
|---------|-------------|-------------|------------|----------|
| Mrpl35  | Mrpl35-002  | 0.0274931   | 1.42935    | 1.42935  |
| Mrpl47  | Mrpl47-002  | 0.0337609   | 1.462      | 1.462    |
| Mrpl48  | Mrpl48-008  | 0.0143507   | 1.27239    | 1.27239  |
| Mrpl50  | Mrpl50-001  | 0.0303259   | 1.14951    | 1.14951  |
| Mrpl53  | Mrpl53-001  | 0.00258079  | 1.3939     | 1.3939   |
| Mrpl57  | Mrpl57-201  | 0.00361355  | 1.32369    | 1.32369  |
| Mrps14  | Mrps14-003  | 0.00481271  | 1.26093    | 1.26093  |
| Mrps18b | Mrps18b-008 | 0.039389    | 2.44376    | 2.44376  |
| Mrps22  | Mrps22-001  | 0.0179055   | 1.40259    | 1.40259  |
| Mrps31  | Mrps31-201  | 0.00125177  | 1.39645    | 1.39645  |
| Mrps34  | Mrps34-002  | 0.0415411   | 1.70684    | 1.70684  |
| Mrps35  | Mrps35-004  | 0.0226968   | 3.55825    | 3.55825  |
| Mrps36  | Mrps36-002  | 0.0128547   | 1.52119    | 1.52119  |
| Mrps5   | Mrps5-007   | 0.0399102   | 1.39473    | 1.39473  |
| Mrps5   | Mrps5-003   | 0.00675284  | 1.52238    | 1.52238  |
| Mrps5   | Mrps5-005   | 0.00222194  | 1.5745     | 1.5745   |
| Mrps5   | Mrps5-004   | 0.00854059  | 1.84359    | 1.84359  |
| Mrps5   | Mrps5-002   | 0.00697293  | 1.98291    | 1.98291  |
| Msantd2 | Msantd2-201 | 0.0352178   | 0.718842   | -1.39113 |
| Msantd3 | Msantd3-003 | 0.0166262   | 1.49786    | 1.49786  |
| Msi1    | Msi1-001    | 0.00523566  | 0.810364   | -1.23401 |
| Msi1    | Msi1-003    | 0.0110167   | 2.74999    | 2.74999  |
| Msi2    | Msi2-001    | 0.02784     | 0.780991   | -1.28042 |
| Msi3    | Msi3-004    | 0.0367061   | 7.42841    | 7.42841  |
| Msl3l2  | Msl3l2-201  | 0.0344041   | 0.646114   | -1.54771 |
| Msr3b   | Msr3b-002   | 0.0461933   | 1.0793e-06 | -926527  |
| Msto1   | Msto1-005   | 0.0420741   | 1.78307    | 1.78307  |
| Msto1   | Msto1-002   | 0.0313977   | 2.04642    | 2.04642  |
| Mt1     | Mt1-201     | 0.0149904   | 1.67036    | 1.67036  |
| Mt3     | Mt3-201     | 0.0109397   | 1.71854    | 1.71854  |
| Mta2    | Mta2-006    | 0.00899985  | 0.194863   | -5.13181 |
| Mta3    | Mta3-002    | 0.00973761  | 2.70762    | 2.70762  |
| Mtbp    | Mtbp-001    | 0.00529991  | 1.72624    | 1.72624  |
| Mtbp    | Mtbp-005    | 0.020812    | 1.89829    | 1.89829  |
| Mtch1   | Mtch1-006   | 0.0454984   | 0.622083   | -1.6075  |
| Mtch1   | Mtch1-002   | 0.0224715   | 0.663776   | -1.50653 |
| Mtcl1   | Mtcl1-004   | 0.00387462  | 1.7032     | 1.7032   |
| Mterf2  | Mterf2-201  | 0.0177454   | 1.33943    | 1.33943  |
| Mterf3  | Mterf3-001  | 0.03043     | 1.33828    | 1.33828  |
| Mterf3  | Mterf3-010  | 0.00224848  | 3.7545     | 3.7545   |
| Mterf4  | Mterf4-001  | 0.00101922  | 1.52593    | 1.52593  |
| Mtf2    | Mtf2-003    | 0.00702059  | 0.502641   | -1.98949 |
| Mtf2    | Mtf2-001    | 0.000321768 | 0.717373   | -1.39398 |

|         |             |             |           |          |
|---------|-------------|-------------|-----------|----------|
| Mtf2    | Mtf2-005    | 0.0172916   | 6.03539   | 6.03539  |
| Mtfmt   | Mtfmt-001   | 0.00889229  | 1.27935   | 1.27935  |
| Mtfr1   | Mtfr1-003   | 0.000337404 | 5.62074   | 5.62074  |
| Mtfr1l  | Mtfr1l-005  | 0.0250432   | 2.67701   | 2.67701  |
| Mtg1    | Mtg1-006    | 0.0129019   | 2.43758   | 2.43758  |
| Mtg2    | Mtg2-001    | 0.0170639   | 1.91428   | 1.91428  |
| Mthfd2  | Mthfd2-001  | 0.0100829   | 0.838074  | -1.19321 |
| Mthfd2l | Mthfd2l-001 | 0.0030886   | 0.640387  | -1.56156 |
| Mthfr   | Mthfr-002   | 0.00495473  | 1.78496   | 1.78496  |
| Mthfr   | Mthfr-001   | 0.00395694  | 1.7884    | 1.7884   |
| Mthfr   | Mthfr-007   | 0.00582166  | 1.86465   | 1.86465  |
| Mthfs   | Mthfs-004   | 0.0198679   | 15.7593   | 15.7593  |
| Mthfsd  | Mthfsd-005  | 0.0342637   | 2.27403   | 2.27403  |
| Mthfsl  | Mthfsl-001  | 0.0353712   | 1.67346   | 1.67346  |
| Mtif2   | Mtif2-201   | 0.00659899  | 1.3161    | 1.3161   |
| Mtif2   | Mtif2-003   | 0.0461203   | 7.41659   | 7.41659  |
| Mtm1    | Mtm1-201    | 0.0204818   | 0.220241  | -4.54049 |
| Mtm1    | Mtm1-003    | 0.0204818   | 0.220241  | -4.54048 |
| Mtmr11  | Mtmr11-001  | 0.0399217   | 0.568297  | -1.75964 |
| Mtmr3   | Mtmr3-004   | 0.00264984  | 1.32726   | 1.32726  |
| Mtmr4   | Mtmr4-003   | 0.00795747  | 2.84008   | 2.84008  |
| Mtmr7   | Mtmr7-001   | 0.000147576 | 1.43824   | 1.43824  |
| Mtor    | Mtor-002    | 0.0101965   | 3.14266   | 3.14266  |
| Mtpap   | Mtpap-201   | 0.00176433  | 1.16364   | 1.16364  |
| Mtpn    | Mtpn-002    | 0.00981465  | 4.1269    | 4.1269   |
| Mtr     | Mtr-201     | 0.0169206   | 1.33632   | 1.33632  |
| Mtrr    | Mtrr-201    | 0.0229635   | 1.43226   | 1.43226  |
| Mttp    | Mttp-001    | 0.0205521   | 1.76763   | 1.76763  |
| Mtus1   | Mtus1-002   | 0.0353961   | 5.27737   | 5.27737  |
| Mtx1    | Mtx1-015    | 0.0145125   | 0.563796  | -1.77369 |
| Mtx2    | Mtx2-002    | 0.0124817   | 1.37463   | 1.37463  |
| Mtyh    | Mtyh-005    | 0.0314066   | 0.0421926 | -23.7009 |
| Mvb12a  | Mvb12a-201  | 0.0138464   | 0.780288  | -1.28158 |
| Mvb12b  | Mvb12b-001  | 0.013998    | 0.760403  | -1.31509 |
| Mvb12b  | Mvb12b-003  | 0.000476158 | 1.84939   | 1.84939  |
| Mvp     | Mvp-001     | 0.0100947   | 0.340595  | -2.93604 |
| Mvp     | Mvp-003     | 0.0203586   | 0.595527  | -1.67918 |
| Mxra7   | Mxra7-002   | 0.00315218  | 0.433477  | -2.30693 |
| Mxra7   | Mxra7-001   | 1.00057e-05 | 0.746809  | -1.33903 |
| Mxra8   | Mxra8-003   | 0.0482636   | 0.589606  | -1.69605 |
| Myadm   | Myadm-002   | 0.0052846   | 0.46601   | -2.14588 |
| Myadm   | Myadm-003   | 0.00907275  | 0.588776  | -1.69844 |
| Mybbp1a | Mybbp1a-007 | 0.00328929  | 2.22761   | 2.22761  |

|         |             |             |           |          |
|---------|-------------|-------------|-----------|----------|
| Mybl1   | Mybl1-001   | 0.0255179   | 0.852042  | -1.17365 |
| Mybpc2  | Mybpc2-001  | 0.0032647   | 5.50303   | 5.50303  |
| Myc     | Myc-006     | 0.0288222   | 1.35737   | 1.35737  |
| Mycbp   | Mycbp-001   | 0.0410462   | 0.738451  | -1.35419 |
| Mycbp2  | Mycbp2-003  | 0.0335332   | 0.712714  | -1.40309 |
| Mycn    | Mycn-002    | 0.000720226 | 0.544611  | -1.83617 |
| Myct1   | Myct1-201   | 0.0298669   | 0.412424  | -2.42469 |
| Myef2   | Myef2-003   | 0.00207813  | 0.530229  | -1.88598 |
| Myg1    | Myg1-007    | 0.0303983   | 1.29854   | 1.29854  |
| Myh9    | Myh9-004    | 0.0423094   | 0.333531  | -2.99823 |
| Myh9    | Myh9-001    | 0.000737377 | 0.763912  | -1.30905 |
| Myh9    | Myh9-002    | 7.58963e-05 | 2.60356   | 2.60356  |
| Myl12a  | Myl12a-002  | 0.0393155   | 0.434046  | -2.3039  |
| Myl12a  | Myl12a-004  | 0.0187706   | 0.588056  | -1.70052 |
| Myl6    | Myl6-201    | 0.00563558  | 0.752369  | -1.32913 |
| Mylpf   | Mylpf-006   | 0.0275515   | 0.544446  | -1.83673 |
| Mynn    | Mynn-004    | 0.0248655   | 1.22743   | 1.22743  |
| Myo10   | Myo10-001   | 0.0288864   | 0.743463  | -1.34506 |
| Myo18a  | Myo18a-002  | 0.00256547  | 0.333997  | -2.99404 |
| Myo18a  | Myo18a-201  | 0.0125794   | 0.423817  | -2.35951 |
| Myo18a  | Myo18a-006  | 0.0140849   | 0.459609  | -2.17576 |
| Myo18a  | Myo18a-202  | 0.0222074   | 0.480577  | -2.08083 |
| Myo18a  | Myo18a-001  | 0.0499603   | 0.620782  | -1.61087 |
| Myo1a   | Myo1a-201   | 0.0120461   | 0.72153   | -1.38594 |
| Myo1b   | Myo1b-012   | 0.00368758  | 0.505972  | -1.9764  |
| Myo1c   | Myo1c-009   | 0.0408767   | 0.0115342 | -86.6987 |
| Myo1h   | Myo1h-004   | 0.0416875   | 5053.93   | 5053.93  |
| Myo5a   | Myo5a-001   | 0.00497981  | 0.599251  | -1.66875 |
| Myo5a   | Myo5a-009   | 0.00450118  | 1.24862   | 1.24862  |
| Myo5a   | Myo5a-003   | 0.00247121  | 2.14714   | 2.14714  |
| Myo5a   | Myo5a-010   | 0.028428    | 9.90496   | 9.90496  |
| Myo5c   | Myo5c-201   | 0.0037057   | 1.58905   | 1.58905  |
| Myo7a   | Myo7a-005   | 0.018175    | 0.557513  | -1.79368 |
| Myo9a   | Myo9a-001   | 0.0439581   | 0.646478  | -1.54684 |
| Myo9b   | Myo9b-201   | 0.0406551   | 0.775426  | -1.28961 |
| Mypopos | Mypopos-002 | 0.0467217   | 1.18129   | 1.18129  |
| Mysm1   | Mysm1-003   | 0.0228571   | 0.24204   | -4.13155 |
| Mysm1   | Mysm1-001   | 0.00438169  | 1.18491   | 1.18491  |
| Mysm1   | Mysm1-005   | 0.00097804  | 2.67764   | 2.67764  |
| Mysm1   | Mysm1-004   | 0.0454621   | 11.6535   | 11.6535  |
| Myt1    | Myt1-003    | 0.0386511   | 1.62932   | 1.62932  |
| Myt1    | Myt1-002    | 0.0042052   | 1.96395   | 1.96395  |
| Myt1l   | Myt1l-201   | 0.0318311   | 0.841339  | -1.18858 |



|         |             |             |          |          |
|---------|-------------|-------------|----------|----------|
| Mzt1    | Mzt1-201    | 0.00467942  | 1.09807  | 1.09807  |
| Mzt2    | Mzt2-002    | 0.020867    | 1.50764  | 1.50764  |
| N4bp2l2 | N4bp2l2-001 | 0.000423325 | 0.799563 | -1.25068 |
| N6amt1  | N6amt1-001  | 0.00218704  | 1.63384  | 1.63384  |
| Naa15   | Naa15-201   | 0.0271217   | 1.32408  | 1.32408  |
| Naa15   | Naa15-004   | 4.21712e-05 | 2.81685  | 2.81685  |
| Naa15   | Naa15-008   | 0.031011    | 2.83606  | 2.83606  |
| Naa15   | Naa15-007   | 0.0041391   | 5.40607  | 5.40607  |
| Naa16   | Naa16-001   | 0.00415292  | 1.53268  | 1.53268  |
| Naa20   | Naa20-006   | 0.0036932   | 2.22838  | 2.22838  |
| Naa25   | Naa25-003   | 0.00633947  | 1.64072  | 1.64072  |
| Naa25   | Naa25-006   | 0.000246397 | 2.16203  | 2.16203  |
| Naa25   | Naa25-004   | 0.00405203  | 8.37172  | 8.37172  |
| Naa35   | Naa35-015   | 0.0391561   | 10.9189  | 10.9189  |
| Naa50   | Naa50-001   | 0.0140874   | 1.21481  | 1.21481  |
| Naa50   | Naa50-004   | 0.0249285   | 1.79572  | 1.79572  |
| Naa60   | Naa60-010   | 0.00988891  | 1.46811  | 1.46811  |
| Naalad2 | Naalad2-001 | 0.00911004  | 2.82912  | 2.82912  |
| Nab1    | Nab1-002    | 0.00117756  | 2.2919   | 2.2919   |
| Nabp1   | Nabp1-003   | 0.0448585   | 0.384197 | -2.60283 |
| Nabp1   | Nabp1-004   | 0.0269884   | 0.411124 | -2.43236 |
| Nabp1   | Nabp1-001   | 0.0199694   | 0.783523 | -1.27629 |
| Nabp1   | Nabp1-008   | 0.00400212  | 7.22706  | 7.22706  |
| Nabp2   | Nabp2-009   | 0.0277981   | 1.93757  | 1.93757  |
| Nacad   | Nacad-001   | 0.0165316   | 0.795581 | -1.25694 |
| Nadsyn1 | Nadsyn1-006 | 0.0389975   | 2.13386  | 2.13386  |
| Nagk    | Nagk-007    | 0.042723    | 0.619648 | -1.61382 |
| Naip5   | Naip5-001   | 0.0175449   | 0.707926 | -1.41258 |
| Naip6   | Naip6-201   | 0.018365    | 0.539145 | -1.85479 |
| Nanog   | Nanog-002   | 0.015915    | 1.47907  | 1.47907  |
| Nanog   | Nanog-003   | 0.0159162   | 1.47908  | 1.47908  |
| Nanos1  | Nanos1-201  | 0.03071     | 0.811509 | -1.23227 |
| Nanp    | Nanp-001    | 0.0331472   | 1.54874  | 1.54874  |
| Nap1l1  | Nap1l1-202  | 0.00015473  | 0.559272 | -1.78804 |
| Napa    | Napa-007    | 0.00553432  | 1.67584  | 1.67584  |
| Napepld | Napepld-002 | 0.0190099   | 1.46891  | 1.46891  |
| Napg    | Napg-001    | 0.00209089  | 0.837949 | -1.19339 |
| Napg    | Napg-004    | 0.0245201   | 2.19716  | 2.19716  |
| Nars    | Nars-201    | 1.54893e-05 | 1.50179  | 1.50179  |
| Nat10   | Nat10-013   | 0.0190105   | 3.77468  | 3.77468  |
| Nat9    | Nat9-001    | 0.031769    | 1.32299  | 1.32299  |
| Nat9    | Nat9-002    | 0.00803034  | 2.33079  | 2.33079  |
| Nat9    | Nat9-006    | 0.0487558   | 2.7905   | 2.7905   |

|         |             |             |          |          |
|---------|-------------|-------------|----------|----------|
| Nat9    | Nat9-005    | 0.0324481   | 3.00582  | 3.00582  |
| Natd1   | Natd1-001   | 0.0238103   | 1.35074  | 1.35074  |
| Nav1    | Nav1-201    | 0.0143162   | 0.300215 | -3.33095 |
| Nav1    | Nav1-001    | 0.010808    | 0.642974 | -1.55527 |
| Nav1    | Nav1-002    | 0.0263792   | 0.823409 | -1.21446 |
| Nbas    | Nbas-201    | 0.000165043 | 1.25409  | 1.25409  |
| Nbea    | Nbea-006    | 0.0394535   | 5.98803  | 5.98803  |
| Ncam1   | Ncam1-006   | 0.0355884   | 0.78043  | -1.28134 |
| Ncam1   | Ncam1-002   | 0.0150626   | 1.82475  | 1.82475  |
| Ncam1   | Ncam1-003   | 0.0115551   | 1.96692  | 1.96692  |
| Ncapd2  | Ncapd2-007  | 0.0257886   | 4.76206  | 4.76206  |
| Ncapd3  | Ncapd3-201  | 0.000218581 | 1.13705  | 1.13705  |
| Ncapg   | Ncapg-002   | 1.80836e-05 | 1.28724  | 1.28724  |
| Ncbp1   | Ncbp1-001   | 0.010793    | 1.38408  | 1.38408  |
| Nck1    | Nck1-006    | 0.00954914  | 1.28871  | 1.28871  |
| Nck2    | Nck2-001    | 0.00381029  | 0.778284 | -1.28488 |
| Nckap1  | Nckap1-003  | 0.0427472   | 0.639605 | -1.56346 |
| Ncoa1   | Ncoa1-201   | 0.00454569  | 1.1669   | 1.1669   |
| Ncoa3   | Ncoa3-201   | 0.00536866  | 0.724998 | -1.37931 |
| Ncoa3   | Ncoa3-001   | 4.6621e-05  | 1.78499  | 1.78499  |
| Ncoa4   | Ncoa4-001   | 0.0293897   | 0.511446 | -1.95524 |
| Ncoa5   | Ncoa5-004   | 0.0474219   | 2.59031  | 2.59031  |
| Ncoa6   | Ncoa6-201   | 0.0012121   | 1.12113  | 1.12113  |
| Ncoa6   | Ncoa6-002   | 0.0372528   | 2.93599  | 2.93599  |
| Ncoa7   | Ncoa7-201   | 0.0208292   | 0.845432 | -1.18283 |
| Ncor1   | Ncor1-004   | 0.0329126   | 1.35252  | 1.35252  |
| Ncor1   | Ncor1-008   | 0.0286489   | 3.59712  | 3.59712  |
| Ncor2   | Ncor2-001   | 0.0427306   | 0.797124 | -1.25451 |
| Ncstn   | Ncstn-001   | 0.0225656   | 0.857595 | -1.16605 |
| Ncstn   | Ncstn-005   | 0.00335628  | 2.10911  | 2.10911  |
| Ndc1    | Ndc1-003    | 0.00102054  | 1.93812  | 1.93812  |
| Ndc80   | Ndc80-201   | 0.0141432   | 1.28741  | 1.28741  |
| Ndfip2  | Ndfip2-003  | 0.0330571   | 1.16249  | 1.16249  |
| Ndr1    | Ndr1-002    | 0.0494825   | 0.636044 | -1.57222 |
| Ndr3    | Ndr3-002    | 0.0205375   | 1.40977  | 1.40977  |
| Ndr3    | Ndr3-001    | 0.0240714   | 1.54143  | 1.54143  |
| Ndst2   | Ndst2-201   | 0.0394975   | 1.38757  | 1.38757  |
| Ndst4   | Ndst4-005   | 0.0216644   | 0.464318 | -2.1537  |
| Ndufa7  | Ndufa7-006  | 0.0240069   | 1.40763  | 1.40763  |
| Ndufa8  | Ndufa8-001  | 0.0117904   | 1.2937   | 1.2937   |
| Ndufa9  | Ndufa9-003  | 0.0227235   | 1.21567  | 1.21567  |
| Ndufab1 | Ndufab1-006 | 0.0312756   | 1.40791  | 1.40791  |
| Ndufaf3 | Ndufaf3-002 | 0.0377453   | 1.34939  | 1.34939  |

|         |             |             |           |          |
|---------|-------------|-------------|-----------|----------|
| Ndufaf3 | Ndufaf3-001 | 0.0203916   | 1.39544   | 1.39544  |
| Ndufaf5 | Ndufaf5-001 | 0.00395934  | 1.42269   | 1.42269  |
| Ndufaf7 | Ndufaf7-201 | 8.02324e-05 | 1.79108   | 1.79108  |
| Ndufb11 | Ndufb11-001 | 0.0116746   | 0.810789  | -1.23337 |
| Ndufb3  | Ndufb3-001  | 0.00738901  | 1.21998   | 1.21998  |
| Ndufb5  | Ndufb5-001  | 0.00521786  | 0.585598  | -1.70766 |
| Ndufb5  | Ndufb5-007  | 0.0159055   | 0.657296  | -1.52138 |
| Ndufb8  | Ndufb8-001  | 0.0175582   | 1.17824   | 1.17824  |
| Ndufc1  | Ndufc1-004  | 0.0323133   | 1.07321   | 1.07321  |
| Ndufs1  | Ndufs1-008  | 0.0263897   | 0.0568977 | -17.5754 |
| Ndufs5  | Ndufs5-001  | 0.023957    | 1.12743   | 1.12743  |
| Ndufs6  | Ndufs6-002  | 0.00175367  | 2.47784   | 2.47784  |
| Ndufv1  | Ndufv1-005  | 0.0223791   | 1.60743   | 1.60743  |
| Ndufv2  | Ndufv2-002  | 0.00666164  | 1.33294   | 1.33294  |
| Ndufv2  | Ndufv2-001  | 0.0284555   | 1.58162   | 1.58162  |
| Neat1   | Neat1-001   | 0.0173232   | 1.3445    | 1.3445   |
| Neb1    | Neb1-001    | 0.00152782  | 0.678728  | -1.47335 |
| Necap2  | Necap2-009  | 0.0167875   | 1.90302   | 1.90302  |
| Nedd1   | Nedd1-201   | 0.00625164  | 1.3025    | 1.3025   |
| Nedd4   | Nedd4-006   | 0.00324579  | 21.0126   | 21.0126  |
| Neil3   | Neil3-001   | 0.0494009   | 0.737497  | -1.35594 |
| Nek2    | Nek2-001    | 0.0271235   | 1.28866   | 1.28866  |
| Nek2    | Nek2-002    | 0.0498266   | 1.47607   | 1.47607  |
| Nek4    | Nek4-201    | 0.00476385  | 1.35202   | 1.35202  |
| Nek6    | Nek6-002    | 0.029463    | 1.79774   | 1.79774  |
| Nek6    | Nek6-003    | 0.00763365  | 1.99661   | 1.99661  |
| Nelfa   | Nelfa-001   | 0.0199113   | 1.2963    | 1.2963   |
| Nelfb   | Nelfb-004   | 0.0110703   | 0.323215  | -3.09391 |
| Nes     | Nes-003     | 0.0284311   | 0.499532  | -2.00188 |
| Nes     | Nes-001     | 0.0205098   | 0.581009  | -1.72114 |
| Neu1    | Neu1-001    | 0.0414708   | 1.30235   | 1.30235  |
| Neu3    | Neu3-201    | 0.00869943  | 1.15233   | 1.15233  |
| Neurl1a | Neurl1a-201 | 0.00906927  | 0.577165  | -1.73261 |
| Neurl2  | Neurl2-001  | 0.000215988 | 0.623004  | -1.60513 |
| Neurl3  | Neurl3-001  | 0.00049715  | 0.429744  | -2.32696 |
| Neurl4  | Neurl4-003  | 0.046607    | 0.312631  | -3.19866 |
| Nf1     | Nf1-007     | 0.049752    | 1.80247   | 1.80247  |
| Nf1     | Nf1-003     | 0.0345326   | 2.05649   | 2.05649  |
| Nfat5   | Nfat5-010   | 0.00108177  | 3.34908   | 3.34908  |
| Nfat5   | Nfat5-005   | 0.00889782  | 4.55765   | 4.55765  |
| Nfat5   | Nfat5-004   | 0.0170482   | 5.83131   | 5.83131  |
| Nfe2l1  | Nfe2l1-204  | 0.0190967   | 1.53328   | 1.53328  |
| Nfib    | Nfib-202    | 0.00693022  | 0.674849  | -1.48181 |

|          |              |             |             |          |
|----------|--------------|-------------|-------------|----------|
| Nfib     | Nfib-201     | 0.0288047   | 0.684001    | -1.46199 |
| Nfib     | Nfib-002     | 0.0404338   | 6.40935     | 6.40935  |
| Nfic     | Nfic-001     | 0.00361156  | 0.831677    | -1.20239 |
| Nfil3    | Nfil3-001    | 0.0244756   | 1.55611     | 1.55611  |
| Nfix     | Nfix-001     | 0.0306987   | 1.31432     | 1.31432  |
| Nfkb2    | Nfkb2-201    | 0.013095    | 0.388777    | -2.57217 |
| Nfkbia   | Nfkbia-201   | 0.00568179  | 0.436791    | -2.28942 |
| Nfkbie   | Nfkbie-201   | 0.0154487   | 0.672753    | -1.48643 |
| Nfkbiz   | Nfkbiz-004   | 0.0184237   | 0.651766    | -1.53429 |
| Nfu1     | Nfu1-001     | 0.00045526  | 1.4843      | 1.4843   |
| Nfu1     | Nfu1-005     | 0.0456111   | 1.69949     | 1.69949  |
| Nfx1     | Nfx1-002     | 0.0344718   | 0.725921    | -1.37756 |
| Nfx1     | Nfx1-007     | 0.000892261 | 1.39772     | 1.39772  |
| Nfxl1    | Nfxl1-001    | 0.0191409   | 1.3506      | 1.3506   |
| Nfya     | Nfya-001     | 0.0251167   | 0.799659    | -1.25053 |
| Ngef     | Ngef-001     | 0.0410991   | 17.2232     | 17.2232  |
| Ngfr     | Ngfr-001     | 0.04854     | 0.732397    | -1.36538 |
| Ngfrap1  | Ngfrap1-002  | 0.0029976   | 1.31946     | 1.31946  |
| Ngfrap1  | Ngfrap1-003  | 9.30037e-05 | 1.45222     | 1.45222  |
| Ngly1    | Ngly1-001    | 0.000217072 | 1.41501     | 1.41501  |
| Ngrn     | Ngrn-001     | 0.00223051  | 1.83463     | 1.83463  |
| Nhlh2    | Nhlh2-002    | 0.0464455   | 3.11942     | 3.11942  |
| Nhlh2    | Nhlh2-001    | 0.0464456   | 3.11942     | 3.11942  |
| Nhlrc2   | Nhlrc2-201   | 0.0493591   | 1.22569     | 1.22569  |
| Nin      | Nin-001      | 0.010468    | 0.679794    | -1.47103 |
| Nipa2    | Nipa2-011    | 0.0428487   | 0.519527    | -1.92483 |
| Nipsnap1 | Nipsnap1-004 | 0.0267684   | 188.328     | 188.328  |
| Nit1     | Nit1-002     | 0.00361478  | 1.28273     | 1.28273  |
| Nit2     | Nit2-201     | 0.00525004  | 1.27347     | 1.27347  |
| Nkain1   | Nkain1-001   | 0.0469726   | 0.692808    | -1.4434  |
| Nkap     | Nkap-001     | 0.0188793   | 0.875115    | -1.14271 |
| Nkiras1  | Nkiras1-002  | 0.0394659   | 1.30157     | 1.30157  |
| Nkiras2  | Nkiras2-001  | 0.0397551   | 1.17921     | 1.17921  |
| Nle1     | Nle1-001     | 0.0165148   | 1.57154     | 1.57154  |
| Nlgn1    | Nlgn1-202    | 0.0164364   | 0.42466     | -2.35483 |
| Nlgn2    | Nlgn2-001    | 0.0142496   | 0.671286    | -1.48968 |
| Nlk      | Nlk-002      | 0.00677885  | 1.91116     | 1.91116  |
| Nlrp4f   | Nlrp4f-201   | 0.0209886   | 0.725124    | -1.37908 |
| Nlrp9b   | Nlrp9b-001   | 0.00273909  | 0.569399    | -1.75624 |
| Nme6     | Nme6-011     | 0.0313      | 0.000708901 | -1410.63 |
| Nmnat1   | Nmnat1-001   | 0.0280543   | 1.74442     | 1.74442  |
| Nmnat2   | Nmnat2-001   | 0.0123238   | 0.681804    | -1.4667  |
| Nmnat2   | Nmnat2-006   | 0.0298893   | 1.41549     | 1.41549  |

|        |            |             |           |          |
|--------|------------|-------------|-----------|----------|
| Nmnat2 | Nmnat2-004 | 0.00642432  | 4.32804   | 4.32804  |
| Nmral1 | Nmral1-006 | 0.0156207   | 2.00649   | 2.00649  |
| Nmrk1  | Nmrk1-004  | 0.0478341   | 0.472495  | -2.11642 |
| Nmrk1  | Nmrk1-001  | 0.00448615  | 1.24872   | 1.24872  |
| Nmt1   | Nmt1-003   | 0.0023795   | 1.43867   | 1.43867  |
| Nmt2   | Nmt2-001   | 0.00158587  | 0.846852  | -1.18084 |
| Nmt2   | Nmt2-003   | 0.014978    | 1.66974   | 1.66974  |
| Nmt2   | Nmt2-002   | 0.000125192 | 2.01168   | 2.01168  |
| Nob1   | Nob1-001   | 0.00431675  | 1.40529   | 1.40529  |
| Noc2l  | Noc2l-201  | 0.048097    | 1.39647   | 1.39647  |
| Noc2l  | Noc2l-202  | 0.00162733  | 1.94089   | 1.94089  |
| Nod1   | Nod1-002   | 0.00436127  | 0.516089  | -1.93765 |
| Nol11  | Nol11-201  | 0.0475239   | 1.55652   | 1.55652  |
| Nol11  | Nol11-002  | 0.0147016   | 1.80208   | 1.80208  |
| Nol4l  | Nol4l-002  | 0.0309816   | 1.32726   | 1.32726  |
| Nol7   | Nol7-201   | 0.00108545  | 1.17562   | 1.17562  |
| Nono   | Nono-007   | 0.000412296 | 1.54631   | 1.54631  |
| Nop14  | Nop14-001  | 0.00695887  | 1.41845   | 1.41845  |
| Nop56  | Nop56-014  | 0.0297054   | 0.407274  | -2.45535 |
| Nop58  | Nop58-005  | 0.0182307   | 2.44857   | 2.44857  |
| Nos1   | Nos1-001   | 0.00288443  | 0.24649   | -4.05697 |
| Nosip  | Nosip-202  | 0.000530095 | 5.25116   | 5.25116  |
| Notch2 | Notch2-001 | 0.00196729  | 0.709646  | -1.40915 |
| Notum  | Notum-004  | 0.015881    | 4.59829   | 4.59829  |
| Nova1  | Nova1-201  | 0.0109586   | 0.730364  | -1.36918 |
| Nova2  | Nova2-001  | 0.0152814   | 0.898177  | -1.11337 |
| Nox1   | Nox1-001   | 0.0195127   | 4.97715   | 4.97715  |
| Npas3  | Npas3-201  | 0.00511322  | 1.89518   | 1.89518  |
| Npb    | Npb-001    | 0.00510442  | 154428    | 154428   |
| Npc1   | Npc1-001   | 0.00284871  | 1.23225   | 1.23225  |
| Npc1l1 | Npc1l1-001 | 0.00203096  | 2.07332   | 2.07332  |
| Npepps | Npepps-007 | 0.00416303  | 0.200789  | -4.98036 |
| Npff   | Npff-001   | 0.0403418   | 0.0148852 | -67.1809 |
| Npm1   | Npm1-005   | 0.0210084   | 0.621232  | -1.60971 |
| Npm1   | Npm1-002   | 0.00547174  | 1.24829   | 1.24829  |
| Nppb   | Nppb-001   | 0.00483572  | 0.166692  | -5.9991  |
| Npr1   | Npr1-005   | 0.000252636 | 1.56778   | 1.56778  |
| Nptn   | Nptn-006   | 0.0058963   | 0.181706  | -5.5034  |
| Npy    | Npy-001    | 0.00451348  | 0.558531  | -1.79041 |
| Nqo1   | Nqo1-001   | 0.044244    | 1.27423   | 1.27423  |
| Nr1d2  | Nr1d2-001  | 0.00270238  | 0.864486  | -1.15676 |
| Nr1h2  | Nr1h2-008  | 0.025268    | 2.13977   | 2.13977  |
| Nr2c1  | Nr2c1-002  | 0.00643295  | 1.69065   | 1.69065  |

|        |            |             |           |          |
|--------|------------|-------------|-----------|----------|
| Nr2c2  | Nr2c2-001  | 0.0133218   | 0.74932   | -1.33454 |
| Nr2c2  | Nr2c2-006  | 0.0244128   | 1.98504   | 1.98504  |
| Nr4a2  | Nr4a2-006  | 0.0132447   | 1.83556   | 1.83556  |
| Nr6a1  | Nr6a1-202  | 0.0226709   | 0.255749  | -3.91008 |
| Nr6a1  | Nr6a1-001  | 0.0472226   | 1.89304   | 1.89304  |
| Nradd  | Nradd-001  | 0.0483035   | 0.773256  | -1.29323 |
| Nras   | Nras-001   | 1.33259e-05 | 0.544272  | -1.83732 |
| Nrbp2  | Nrbp2-201  | 0.0188589   | 1.46573   | 1.46573  |
| Nrde2  | Nrde2-201  | 0.00185516  | 1.19643   | 1.19643  |
| Nrep   | Nrep-202   | 0.0338124   | 0.302644  | -3.30421 |
| Nrep   | Nrep-203   | 0.0124516   | 0.42595   | -2.3477  |
| Nrip2  | Nrip2-003  | 0.000950956 | 3.33571   | 3.33571  |
| Nrm    | Nrm-001    | 0.00182134  | 0.669215  | -1.49429 |
| Nrn1   | Nrn1-001   | 0.040824    | 0.854816  | -1.16984 |
| Nrn1l  | Nrn1l-002  | 0.0267709   | 0.226862  | -4.40796 |
| Nrsn1  | Nrsn1-001  | 0.0440814   | 1.20207   | 1.20207  |
| Nrxn1  | Nrxn1-017  | 0.0481958   | 0.0192845 | -51.8551 |
| Nrxn2  | Nrxn2-004  | 0.0329117   | 0.873804  | -1.14442 |
| Nrxn2  | Nrxn2-006  | 0.00499952  | 1.22605   | 1.22605  |
| Nrxn2  | Nrxn2-012  | 0.0418195   | 2.76896   | 2.76896  |
| Nsd1   | Nsd1-201   | 0.0425715   | 1.45382   | 1.45382  |
| Nsf    | Nsf-001    | 0.0126967   | 1.52957   | 1.52957  |
| Nsfl1c | Nsfl1c-002 | 0.00486942  | 1.33832   | 1.33832  |
| Nsg2   | Nsg2-001   | 0.001751    | 1.51712   | 1.51712  |
| Nsl1   | Nsl1-001   | 0.0119164   | 1.21149   | 1.21149  |
| Nsmaf  | Nsmaf-007  | 0.0439491   | 965.543   | 965.543  |
| Nt5c3  | Nt5c3-001  | 0.0216313   | 1.309     | 1.309    |
| Nt5dc1 | Nt5dc1-001 | 0.0439528   | 1.60122   | 1.60122  |
| Ntan1  | Ntan1-008  | 0.00549014  | 1.84506   | 1.84506  |
| Ntn1   | Ntn1-201   | 0.0469925   | 0.482453  | -2.07274 |
| Ntn1   | Ntn1-001   | 0.0469929   | 0.482453  | -2.07274 |
| Ntpcr  | Ntpcr-001  | 0.00101703  | 1.3574    | 1.3574   |
| Ntrk3  | Ntrk3-002  | 0.0144368   | 0.869472  | -1.15012 |
| Nuak1  | Nuak1-001  | 0.0323902   | 0.662996  | -1.5083  |
| Nucb1  | Nucb1-005  | 0.0016843   | 0.620041  | -1.6128  |
| Nucb1  | Nucb1-001  | 0.0201208   | 0.831338  | -1.20288 |
| Nucb2  | Nucb2-001  | 0.000437065 | 1.35502   | 1.35502  |
| Nucks1 | Nucks1-001 | 0.00672947  | 1.26386   | 1.26386  |
| Nudt17 | Nudt17-002 | 0.0263737   | 2.61758   | 2.61758  |
| Nudt21 | Nudt21-201 | 0.0474579   | 0.821896  | -1.2167  |
| Nudt3  | Nudt3-003  | 0.0314602   | 2.19806   | 2.19806  |
| Nudt5  | Nudt5-003  | 0.032559    | 1.6491    | 1.6491   |
| Nudt5  | Nudt5-201  | 0.00443908  | 1.67341   | 1.67341  |

|              |                  |             |             |              |
|--------------|------------------|-------------|-------------|--------------|
| Nudt9        | Nudt9-001        | 0.00219747  | 1.40406     | 1.40406      |
| Nudt9        | Nudt9-003        | 0.0409619   | 2.33491     | 2.33491      |
| Nufip1       | Nufip1-201       | 0.00345686  | 1.17176     | 1.17176      |
| Nufip2       | Nufip2-001       | 0.0170839   | 1.12874     | 1.12874      |
| Numa1        | Numa1-001        | 0.00122914  | 0.861896    | -1.16023     |
| Nup160       | Nup160-003       | 0.0465897   | 2.61738     | 2.61738      |
| Nup205       | Nup205-006       | 0.0482284   | 0.745666    | -1.34108     |
| Nup210       | Nup210-002       | 0.0202366   | 0.803562    | -1.24446     |
| Nup54        | Nup54-001        | 0.00440585  | 1.19208     | 1.19208      |
| Nup88        | Nup88-004        | 0.0235378   | 2.14242     | 2.14242      |
| Nupl2        | Nupl2-002        | 0.0400211   | 2.31007     | 2.31007      |
| Nupr1        | Nupr1-001        | 0.00149218  | 2.42684     | 2.42684      |
| Nupr1        | Nupr1-005        | 0.01212     | 2.8272      | 2.8272       |
| Nus1         | Nus1-001         | 0.0229143   | 1.1611      | 1.1611       |
| Nus1         | Nus1-002         | 0.00271096  | 3.24923     | 3.24923      |
| Nusap1       | Nusap1-001       | 0.00690681  | 1.1681      | 1.1681       |
| Nwd2         | Nwd2-002         | 0.0177741   | 18.1051     | 18.1051      |
| Nxf1         | Nxf1-001         | 0.021515    | 1.19069     | 1.19069      |
| Nynrin       | Nynrin-202       | 0.0370189   | 0.663887    | -1.50628     |
| Oasl2        | Oasl2-007        | 0.0102368   | 0.653705    | -1.52974     |
| Obfc1        | Obfc1-001        | 0.0411127   | 1.3837      | 1.3837       |
| Obscn        | Obscn-005        | 0.0407536   | 160.689     | 160.689      |
| Obsl1        | Obsl1-002        | 0.02653     | 2.43711     | 2.43711      |
| Ocrl         | Ocrl-004         | 0.0153218   | 2.05708     | 2.05708      |
| Odc1         | Odc1-201         | 0.0463379   | 0.708102    | -1.41223     |
| Odf2         | Odf2-017         | 0.0436498   | 0.265182    | -3.771       |
| Odf2         | Odf2-002         | 0.0326939   | 0.70585     | -1.41673     |
| Odf2l        | Odf2l-014        | 0.0414148   | 1.98967     | 1.98967      |
| Odf3         | Odf3-002         | 0.00025821  | 6.99511e-09 | -1.42957e+08 |
| Odf3b        | Odf3b-201        | 0.0359741   | 5.16616     | 5.16616      |
| Ogdhl        | Ogdhl-201        | 8.41212e-05 | 0.768504    | -1.30123     |
| Ogfod1       | Ogfod1-001       | 0.0442901   | 1.43353     | 1.43353      |
| Ogfod1       | Ogfod1-003       | 0.0261435   | 2.64705     | 2.64705      |
| Ogfod3       | Ogfod3-001       | 0.00325805  | 0.750283    | -1.33283     |
| Ogg1         | Ogg1-008         | 0.00616193  | 0.187133    | -5.34378     |
| Ola1         | Ola1-004         | 0.0178919   | 1.17766     | 1.17766      |
| Olfm1        | Olfm1-001        | 0.0258369   | 0.569389    | -1.75627     |
| Olfml2a      | Olfml2a-001      | 0.0074544   | 0.661414    | -1.51191     |
| Olfml2b      | Olfml2b-001      | 0.00628675  | 0.674418    | -1.48276     |
| Olfr1372-ps1 | Olfr1372-ps1-002 | 0.0222093   | 2.29374     | 2.29374      |
| Olfr222      | Olfr222-001      | 0.0193535   | 1.75327     | 1.75327      |
| Olfr368      | Olfr368-001      | 0.00261213  | 1.54014     | 1.54014      |
| Olfr69       | Olfr69-001       | 0.000767801 | 2.05454     | 2.05454      |

|        |            |             |           |          |
|--------|------------|-------------|-----------|----------|
| Opa1   | Opa1-003   | 0.00170645  | 1.96321   | 1.96321  |
| Opa1   | Opa1-002   | 0.0490079   | 3.60008   | 3.60008  |
| Opa3   | Opa3-002   | 0.00265476  | 0.365807  | -2.73368 |
| Optn   | Optn-001   | 0.0235422   | 0.679156  | -1.47242 |
| Orai3  | Orai3-001  | 0.00222679  | 0.623546  | -1.60373 |
| Orc3   | Orc3-010   | 0.0210854   | 2.41471   | 2.41471  |
| Orc4   | Orc4-004   | 0.00545657  | 1.36058   | 1.36058  |
| Ormdl3 | Ormdl3-001 | 0.0121114   | 1.35409   | 1.35409  |
| Osbp   | Osbp-201   | 0.000182979 | 1.23111   | 1.23111  |
| Osbpl5 | Osbpl5-001 | 0.00670547  | 0.725209  | -1.37891 |
| Osbpl6 | Osbpl6-006 | 0.0152168   | 3.21904   | 3.21904  |
| Osbpl8 | Osbpl8-202 | 0.000312563 | 0.79691   | -1.25485 |
| Oser1  | Oser1-001  | 0.00900461  | 1.17048   | 1.17048  |
| Osgep  | Osgep-007  | 0.0126859   | 0.465983  | -2.146   |
| Osgep  | Osgep-008  | 0.0300537   | 0.766986  | -1.3038  |
| Ost4   | Ost4-001   | 0.0489087   | 1.21748   | 1.21748  |
| Ostc   | Ostc-001   | 0.000350606 | 1.25979   | 1.25979  |
| Otop2  | Otop2-001  | 0.0366753   | 2.2042    | 2.2042   |
| Otub2  | Otub2-001  | 0.00382054  | 1.82286   | 1.82286  |
| Otub2  | Otub2-003  | 0.00936506  | 2.06979   | 2.06979  |
| Otub2  | Otub2-201  | 0.0367092   | 2.44049   | 2.44049  |
| Otud1  | Otud1-001  | 0.00367776  | 4.74739   | 4.74739  |
| Otud3  | Otud3-001  | 0.00918621  | 1.24275   | 1.24275  |
| Otud7b | Otud7b-001 | 0.00727639  | 0.494454  | -2.02243 |
| Otud7b | Otud7b-201 | 0.0120505   | 0.577312  | -1.73217 |
| Otud7b | Otud7b-006 | 0.0330062   | 24.0701   | 24.0701  |
| Otx1   | Otx1-001   | 0.019923    | 1.35149   | 1.35149  |
| Oxct1  | Oxct1-001  | 0.00303302  | 0.605383  | -1.65185 |
| Oxct1  | Oxct1-002  | 0.00634886  | 2.16844   | 2.16844  |
| Oxld1  | Oxld1-001  | 0.0101599   | 1.6129    | 1.6129   |
| Oxnad1 | Oxnad1-005 | 0.00600104  | 3.80884   | 3.80884  |
| Oxsr1  | Oxsr1-001  | 0.0111724   | 0.808494  | -1.23687 |
| Oxsr1  | Oxsr1-002  | 1.28295e-05 | 10.5656   | 10.5656  |
| P2rx1  | P2rx1-001  | 0.00481235  | 0.0747174 | -13.3838 |
| P2rx2  | P2rx2-001  | 0.0481253   | 4.79947   | 4.79947  |
| P2rx3  | P2rx3-002  | 0.0352138   | 2.04796   | 2.04796  |
| P2rx3  | P2rx3-005  | 0.00107198  | 3.13885   | 3.13885  |
| P2rx4  | P2rx4-002  | 0.0410048   | 1.2664    | 1.2664   |
| P2rx7  | P2rx7-001  | 0.00115165  | 0.635911  | -1.57255 |
| P2ry2  | P2ry2-201  | 0.028811    | 0.548307  | -1.8238  |
| P2ry6  | P2ry6-201  | 0.000826814 | 0.528796  | -1.89109 |
| P3h1   | P3h1-003   | 0.0209171   | 0.28248   | -3.54007 |
| P3h1   | P3h1-008   | 0.0302853   | 3.40094   | 3.40094  |



|          |              |             |             |          |
|----------|--------------|-------------|-------------|----------|
| P3h4     | P3h4-002     | 0.017909    | 0.363607    | -2.75022 |
| P3h4     | P3h4-001     | 0.0143611   | 0.772756    | -1.29407 |
| P4ha2    | P4ha2-016    | 0.0383926   | 1.34428     | 1.34428  |
| P4ha2    | P4ha2-001    | 0.0417562   | 1.52848     | 1.52848  |
| P4ha2    | P4ha2-002    | 0.00527029  | 1.62966     | 1.62966  |
| P4ha2    | P4ha2-005    | 0.0146008   | 2.03766     | 2.03766  |
| P4ha3    | P4ha3-001    | 0.0149423   | 2.96699e-05 | -33704.2 |
| P4hb     | P4hb-001     | 0.0474816   | 1.06033     | 1.06033  |
| P4htm    | P4htm-001    | 0.0205181   | 1.80258     | 1.80258  |
| Pa2g4    | Pa2g4-002    | 0.0230213   | 1.4738      | 1.4738   |
| Pabpc1   | Pabpc1-005   | 0.0145012   | 0.481272    | -2.07783 |
| Pabpc1   | Pabpc1-006   | 0.0375757   | 0.763093    | -1.31046 |
| Pabpc1   | Pabpc1-001   | 0.0190633   | 0.803082    | -1.2452  |
| Pabpc1l  | Pabpc1l-005  | 0.002993    | 0.000888438 | -1125.57 |
| Pabpc4   | Pabpc4-006   | 0.0490924   | 0.578934    | -1.72731 |
| Pacrgl   | Pacrgl-009   | 0.0297802   | 11.4506     | 11.4506  |
| Pacsin1  | Pacsin1-004  | 0.0128547   | 2.82112     | 2.82112  |
| Pacsin2  | Pacsin2-203  | 0.0259574   | 0.727799    | -1.37401 |
| Pacsin2  | Pacsin2-202  | 0.0420887   | 1.40121     | 1.40121  |
| Pacsin3  | Pacsin3-010  | 0.0465454   | 0.224116    | -4.46198 |
| Padi2    | Padi2-001    | 0.0163508   | 0.695933    | -1.43692 |
| Padi3    | Padi3-001    | 0.0125061   | 0.623844    | -1.60296 |
| Paf1     | Paf1-008     | 0.0288187   | 0.424984    | -2.35303 |
| Pafah1b1 | Pafah1b1-004 | 0.0396603   | 0.617111    | -1.62045 |
| Pafah1b1 | Pafah1b1-001 | 0.00219664  | 1.65471     | 1.65471  |
| Paics    | Paics-002    | 0.00754507  | 0.818231    | -1.22215 |
| Paip2b   | Paip2b-003   | 0.00943012  | 3.12555     | 3.12555  |
| Pak4     | Pak4-003     | 0.0152886   | 2.33696     | 2.33696  |
| Palb2    | Palb2-008    | 0.0210624   | 0.189063    | -5.28924 |
| Palb2    | Palb2-005    | 0.0110836   | 0.369368    | -2.70732 |
| Palb2    | Palb2-001    | 0.0294029   | 1.52463     | 1.52463  |
| Palld    | Palld-003    | 0.00689909  | 2.72418     | 2.72418  |
| Palld    | Palld-004    | 0.0422929   | 3.08155     | 3.08155  |
| Pank1    | Pank1-202    | 0.0309681   | 1.52886     | 1.52886  |
| Pank3    | Pank3-001    | 0.00195236  | 0.762282    | -1.31185 |
| Pank4    | Pank4-002    | 0.0215832   | 0.431125    | -2.31951 |
| Papd5    | Papd5-201    | 0.0458545   | 0.723023    | -1.38308 |
| Papln    | Papln-001    | 0.00872442  | 0.284437    | -3.51571 |
| Papln    | Papln-002    | 0.00741079  | 5.91052     | 5.91052  |
| Papola   | Papola-004   | 0.0402449   | 0.775123    | -1.29012 |
| Papola   | Papola-001   | 0.0165303   | 0.915782    | -1.09196 |
| Papola   | Papola-010   | 0.0315153   | 1.43624     | 1.43624  |
| Papola   | Papola-009   | 0.000921819 | 3.5859      | 3.5859   |

|         |             |             |          |          |
|---------|-------------|-------------|----------|----------|
| Papolg  | Papolg-001  | 0.0145285   | 1.23669  | 1.23669  |
| Papolg  | Papolg-002  | 0.0212124   | 4.6129   | 4.6129   |
| Papss2  | Papss2-201  | 0.0454234   | 1.13334  | 1.13334  |
| Paqr3   | Paqr3-004   | 0.0177232   | 1.95154  | 1.95154  |
| Pard3   | Pard3-002   | 0.00876724  | 0.694398 | -1.4401  |
| Pard3   | Pard3-006   | 0.0448248   | 2.11743  | 2.11743  |
| Pard3   | Pard3-019   | 0.00126886  | 2.23878  | 2.23878  |
| Pard6a  | Pard6a-202  | 0.00737244  | 1.34573  | 1.34573  |
| Park7   | Park7-007   | 0.0224108   | 1.75458  | 1.75458  |
| Park7   | Park7-009   | 0.0385933   | 2.02451  | 2.02451  |
| Parp11  | Parp11-001  | 0.0416189   | 1.50977  | 1.50977  |
| Parp16  | Parp16-201  | 0.00705702  | 1.28334  | 1.28334  |
| Parp3   | Parp3-004   | 0.000278944 | 0.373528 | -2.67718 |
| Parp4   | Parp4-001   | 0.0332616   | 1.1487   | 1.1487   |
| Parp8   | Parp8-201   | 0.0246018   | 0.87413  | -1.144   |
| Parp9   | Parp9-001   | 0.00090959  | 1.88101  | 1.88101  |
| Parva   | Parva-001   | 0.0436538   | 0.700127 | -1.42831 |
| Patl1   | Patl1-201   | 0.00197269  | 1.47325  | 1.47325  |
| Pax6    | Pax6-024    | 0.0298507   | 5.38071  | 5.38071  |
| Paxip1  | Paxip1-005  | 0.00102985  | 0.635913 | -1.57254 |
| Paxip1  | Paxip1-006  | 0.00607776  | 2.95556  | 2.95556  |
| Pbld2   | Pbld2-001   | 0.000446169 | 2.40706  | 2.40706  |
| Pbld2   | Pbld2-002   | 0.0172194   | 7.07762  | 7.07762  |
| Pbx1    | Pbx1-002    | 0.0115067   | 0.818781 | -1.22133 |
| Pbx2    | Pbx2-001    | 0.0260197   | 0.761117 | -1.31386 |
| Pbx3    | Pbx3-003    | 0.0358834   | 9.42196  | 9.42196  |
| Pbxip1  | Pbxip1-001  | 0.00130316  | 0.72234  | -1.38439 |
| Pcbp2   | Pcbp2-203   | 0.00219268  | 1.20398  | 1.20398  |
| Pcbp3   | Pcbp3-008   | 0.0349113   | 0.475221 | -2.10429 |
| Pcbp3   | Pcbp3-005   | 0.0170376   | 2.00179  | 2.00179  |
| Pcbp4   | Pcbp4-001   | 0.00226333  | 0.77798  | -1.28538 |
| Pcdh1   | Pcdh1-004   | 4.4003e-06  | 0.582714 | -1.71611 |
| Pcdh1   | Pcdh1-002   | 0.000664631 | 0.640423 | -1.56147 |
| Pcdh1   | Pcdh1-005   | 0.0464844   | 1.25493  | 1.25493  |
| Pcdh12  | Pcdh12-004  | 0.00715493  | 0.404271 | -2.47359 |
| Pcdh17  | Pcdh17-201  | 0.0421855   | 1.26185  | 1.26185  |
| Pcdha3  | Pcdha3-001  | 0.000320238 | 2.1645   | 2.1645   |
| Pcdha8  | Pcdha8-001  | 0.0403806   | 0.648085 | -1.54301 |
| Pcdha9  | Pcdha9-001  | 0.00064012  | 0.488112 | -2.04871 |
| Pcdhb1  | Pcdhb1-001  | 0.000976554 | 2.54967  | 2.54967  |
| Pcdhb10 | Pcdhb10-001 | 0.00405937  | 1.67875  | 1.67875  |
| Pcdhb11 | Pcdhb11-001 | 0.0250712   | 1.31834  | 1.31834  |
| Pcdhb17 | Pcdhb17-001 | 0.0179121   | 1.29042  | 1.29042  |

|         |             |             |          |          |
|---------|-------------|-------------|----------|----------|
| Pcdhb2  | Pcdhb2-001  | 0.0026687   | 1.79764  | 1.79764  |
| Pcdhb20 | Pcdhb20-001 | 0.00516441  | 1.21627  | 1.21627  |
| Pcdhb4  | Pcdhb4-001  | 0.000146543 | 0.662394 | -1.50968 |
| Pcdhb6  | Pcdhb6-001  | 0.0101575   | 1.92064  | 1.92064  |
| Pcdhb7  | Pcdhb7-001  | 0.0239614   | 1.56029  | 1.56029  |
| Pcdhb8  | Pcdhb8-002  | 0.000148903 | 9.54693  | 9.54693  |
| Pcdhb9  | Pcdhb9-001  | 0.00862561  | 2.51375  | 2.51375  |
| Pcdhgb1 | Pcdhgb1-001 | 0.000762636 | 0.416949 | -2.39837 |
| Pcdhgb7 | Pcdhgb7-001 | 0.0118584   | 0.242883 | -4.11721 |
| Pcdhgb8 | Pcdhgb8-001 | 0.0228839   | 0.697828 | -1.43302 |
| Pcdhgc3 | Pcdhgc3-003 | 0.0032665   | 0.39189  | -2.55174 |
| Pcdhgc3 | Pcdhgc3-001 | 0.00137531  | 0.580067 | -1.72394 |
| Pcgf1   | Pcgf1-007   | 0.0142983   | 2.67518  | 2.67518  |
| Pcgf2   | Pcgf2-002   | 0.00891178  | 1.26349  | 1.26349  |
| Pcgf3   | Pcgf3-001   | 0.00845781  | 0.695487 | -1.43784 |
| Pcid2   | Pcid2-001   | 0.00298092  | 1.29797  | 1.29797  |
| Pcif1   | Pcif1-004   | 0.0371634   | 2.08657  | 2.08657  |
| Pcmtd1  | Pcmtd1-001  | 0.0436776   | 1.25074  | 1.25074  |
| Pcnp    | Pcnp-004    | 0.0333516   | 13.4245  | 13.4245  |
| Pcnxl2  | Pcnxl2-002  | 0.00153462  | 1.34373  | 1.34373  |
| Pcnxl3  | Pcnxl3-004  | 0.0274103   | 0.693002 | -1.443   |
| Pcp4    | Pcp4-001    | 0.00107686  | 1.37762  | 1.37762  |
| Pcx     | Pcx-201     | 0.0039838   | 1.19392  | 1.19392  |
| Pdcd10  | Pdcd10-004  | 0.0310537   | 0.41447  | -2.41272 |
| Pdcd10  | Pdcd10-005  | 0.0367851   | 28.368   | 28.368   |
| Pdcd2   | Pdcd2-001   | 0.0116489   | 1.24522  | 1.24522  |
| Pdcd6ip | Pdcd6ip-001 | 0.0420691   | 0.815056 | -1.22691 |
| Pdcd6ip | Pdcd6ip-002 | 0.0498744   | 1.16565  | 1.16565  |
| Pdcd7   | Pdcd7-201   | 0.000529557 | 0.624424 | -1.60148 |
| Pde10a  | Pde10a-001  | 0.0463478   | 0.660314 | -1.51443 |
| Pde10a  | Pde10a-009  | 0.00500658  | 2.36332  | 2.36332  |
| Pde4a   | Pde4a-001   | 0.03679     | 0.746066 | -1.34036 |
| Pde4b   | Pde4b-012   | 0.0391499   | 0.31143  | -3.21099 |
| Pde4b   | Pde4b-003   | 0.00908964  | 0.522845 | -1.91261 |
| Pde4b   | Pde4b-008   | 0.0399348   | 2.8886   | 2.8886   |
| Pde4c   | Pde4c-004   | 0.0223343   | 0.135887 | -7.35904 |
| Pde4dip | Pde4dip-005 | 0.000328895 | 1.76225  | 1.76225  |
| Pde4dip | Pde4dip-004 | 0.000516831 | 2.68097  | 2.68097  |
| Pde7a   | Pde7a-009   | 0.0456013   | 0.51765  | -1.93181 |
| Pde7a   | Pde7a-001   | 0.000233703 | 0.648354 | -1.54237 |
| Pdha1   | Pdha1-002   | 0.0233745   | 2.90538  | 2.90538  |
| Pdia5   | Pdia5-201   | 0.0027034   | 1.43336  | 1.43336  |
| Pdk1    | Pdk1-001    | 0.000443397 | 0.732107 | -1.36592 |

|         |             |             |          |          |
|---------|-------------|-------------|----------|----------|
| Pdlim7  | Pdlim7-002  | 0.00460368  | 0.436104 | -2.29303 |
| Pdlim7  | Pdlim7-005  | 0.000953372 | 2.26286  | 2.26286  |
| Pdpk1   | Pdpk1-007   | 0.0335248   | 2.10542  | 2.10542  |
| Pdpk1   | Pdpk1-002   | 0.000712129 | 3.07634  | 3.07634  |
| Pdrg1   | Pdrg1-001   | 0.0165149   | 1.50294  | 1.50294  |
| Pdss2   | Pdss2-002   | 0.011637    | 2.0095   | 2.0095   |
| Pdxk    | Pdxk-001    | 0.00397051  | 1.62177  | 1.62177  |
| Pdzd11  | Pdzd11-001  | 0.0368351   | 1.60812  | 1.60812  |
| Pdzd2   | Pdzd2-004   | 0.00455664  | 0.66853  | -1.49582 |
| Pea15a  | Pea15a-001  | 0.000625734 | 0.727197 | -1.37514 |
| Peak1   | Peak1-002   | 2.73272e-05 | 0.685378 | -1.45905 |
| Pebp1   | Pebp1-001   | 0.00111761  | 1.17334  | 1.17334  |
| Pecr    | Pecr-001    | 0.0286682   | 1.21639  | 1.21639  |
| Pef1    | Pef1-201    | 0.0460451   | 1.1596   | 1.1596   |
| Peg13   | Peg13-001   | 0.0368113   | 0.856104 | -1.16808 |
| Peg3    | Peg3-001    | 0.0040434   | 0.787758 | -1.26943 |
| Peli3   | Peli3-001   | 0.0326413   | 88443.3  | 88443.3  |
| Per2    | Per2-001    | 0.000290483 | 1.47772  | 1.47772  |
| Pes1    | Pes1-002    | 0.0308406   | 1.48963  | 1.48963  |
| Pex11a  | Pex11a-001  | 0.00289812  | 0.159517 | -6.26892 |
| Pex11g  | Pex11g-003  | 0.00860095  | 0.154307 | -6.48059 |
| Pex16   | Pex16-001   | 0.043768    | 0.455291 | -2.1964  |
| Pex19   | Pex19-004   | 0.0225484   | 0.409155 | -2.44406 |
| Pex19   | Pex19-005   | 0.0349884   | 2.73189  | 2.73189  |
| Pex2    | Pex2-001    | 0.00316201  | 1.80149  | 1.80149  |
| Pex5    | Pex5-001    | 0.0151013   | 1.60274  | 1.60274  |
| Pfdn1   | Pfdn1-201   | 0.00020412  | 1.30898  | 1.30898  |
| Pfdn2   | Pfdn2-003   | 0.00156212  | 1.27076  | 1.27076  |
| Pfdn2   | Pfdn2-002   | 0.00450345  | 1.37861  | 1.37861  |
| Pfdn4   | Pfdn4-004   | 0.00393247  | 1.17952  | 1.17952  |
| Pfkfb4  | Pfkfb4-001  | 0.0438186   | 9.28245  | 9.28245  |
| Pfkm    | Pfkm-202    | 0.0106508   | 1.62449  | 1.62449  |
| Pfn1    | Pfn1-003    | 0.0172565   | 0.78992  | -1.26595 |
| Pfn2    | Pfn2-002    | 0.028146    | 0.723578 | -1.38202 |
| Pgap1   | Pgap1-004   | 0.00156797  | 13.9349  | 13.9349  |
| Pgap2   | Pgap2-002   | 0.0421863   | 1.425    | 1.425    |
| Pgap2   | Pgap2-020   | 0.00902197  | 7.63491  | 7.63491  |
| Pgap2   | Pgap2-011   | 0.0446193   | 9.64037  | 9.64037  |
| Pgap3   | Pgap3-001   | 0.0131427   | 1.85573  | 1.85573  |
| Pgbd5   | Pgbd5-005   | 0.0143071   | 2.72553  | 2.72553  |
| Pgd     | Pgd-003     | 0.0473549   | 0.813947 | -1.22858 |
| Pggt1b  | Pggt1b-201  | 0.0465399   | 1.09476  | 1.09476  |
| Pglyrp1 | Pglyrp1-002 | 0.0018603   | 3.5802   | 3.5802   |

|          |              |             |          |          |
|----------|--------------|-------------|----------|----------|
| Pgrmc2   | Pgrmc2-001   | 0.00217967  | 1.19716  | 1.19716  |
| Phactr2  | Phactr2-201  | 3.4709e-05  | 0.592983 | -1.68639 |
| Phactr4  | Phactr4-001  | 0.00321378  | 0.62025  | -1.61225 |
| Phc1     | Phc1-002     | 0.0297516   | 1.63832  | 1.63832  |
| Phc2     | Phc2-005     | 0.0134396   | 0.483697 | -2.06741 |
| Phc2     | Phc2-004     | 0.0284028   | 0.778335 | -1.28479 |
| Phc3     | Phc3-001     | 0.00110267  | 0.819155 | -1.22077 |
| Phc3     | Phc3-201     | 0.00985163  | 8.92674  | 8.92674  |
| Phf10    | Phf10-001    | 0.000112515 | 1.46701  | 1.46701  |
| Phf10    | Phf10-002    | 0.00883908  | 1.60452  | 1.60452  |
| Phf10    | Phf10-004    | 0.0456941   | 2.81336  | 2.81336  |
| Phf13    | Phf13-001    | 0.000142673 | 0.825993 | -1.21066 |
| Phf14    | Phf14-009    | 0.0127885   | 2.26924  | 2.26924  |
| Phf19    | Phf19-005    | 0.0497873   | 4.01196  | 4.01196  |
| Phf21a   | Phf21a-201   | 0.00592145  | 0.518321 | -1.92931 |
| Phf21a   | Phf21a-202   | 0.0248064   | 0.556818 | -1.79592 |
| Phf21b   | Phf21b-003   | 0.00127673  | 2.49047  | 2.49047  |
| Phf23    | Phf23-009    | 0.0132426   | 1.49614  | 1.49614  |
| Phf8     | Phf8-001     | 0.0474733   | 1.22904  | 1.22904  |
| Phgdh    | Phgdh-001    | 0.000610899 | 1.35128  | 1.35128  |
| Phip     | Phip-006     | 0.00961591  | 0.173067 | -5.77811 |
| Phkg1    | Phkg1-006    | 0.0378772   | 1.73586  | 1.73586  |
| Phkg1    | Phkg1-004    | 0.0444635   | 1.78982  | 1.78982  |
| Phkg2    | Phkg2-003    | 0.00127668  | 1.72648  | 1.72648  |
| Phldb1   | Phldb1-015   | 0.0419016   | 0.624003 | -1.60256 |
| Phospho1 | Phospho1-001 | 0.0346727   | 1.79046  | 1.79046  |
| Phpt1    | Phpt1-002    | 0.0455555   | 0.724756 | -1.37977 |
| Phyh     | Phyh-001     | 0.00200711  | 0.652235 | -1.53319 |
| Phyhd1   | Phyhd1-011   | 0.022362    | 0.6256   | -1.59847 |
| Pi16     | Pi16-002     | 0.00810992  | 0.676948 | -1.47722 |
| Pi4k2b   | Pi4k2b-002   | 0.044859    | 0.489545 | -2.04271 |
| Pi4k2b   | Pi4k2b-001   | 0.0414991   | 0.719363 | -1.39012 |
| Pianp    | Pianp-001    | 0.00678699  | 0.380894 | -2.6254  |
| Pias4    | Pias4-004    | 0.046931    | 0.553683 | -1.80609 |
| Pick1    | Pick1-004    | 0.00519369  | 4.72623  | 4.72623  |
| Pidd1    | Pidd1-201    | 0.0164454   | 0.112673 | -8.87523 |
| Piezo1   | Piezo1-003   | 0.00253761  | 0.420732 | -2.37681 |
| Piezo1   | Piezo1-001   | 0.00124029  | 0.632038 | -1.58218 |
| Piezo1   | Piezo1-201   | 0.0326742   | 0.692889 | -1.44323 |
| Pigb     | Pigb-201     | 0.0299068   | 0.609987 | -1.63938 |
| Pigb     | Pigb-005     | 0.00441464  | 3.99808  | 3.99808  |
| Pigf     | Pigf-001     | 0.0294764   | 1.2088   | 1.2088   |
| Pigg     | Pigg-002     | 0.0274334   | 1.80775  | 1.80775  |

|          |              |             |          |          |
|----------|--------------|-------------|----------|----------|
| Pigh     | Pigh-201     | 0.000417169 | 2.10963  | 2.10963  |
| Pigk     | Pigk-002     | 0.00985459  | 1.67108  | 1.67108  |
| Pigl     | Pigl-001     | 0.0189396   | 1.27949  | 1.27949  |
| Pign     | Pign-002     | 0.000378498 | 4.60505  | 4.60505  |
| Pigp     | Pigp-002     | 0.0253505   | 0.307496 | -3.25208 |
| Pigp     | Pigp-006     | 0.000170379 | 5.42017  | 5.42017  |
| Pigq     | Pigq-001     | 0.00179522  | 0.625332 | -1.59915 |
| Pigq     | Pigq-006     | 0.0132554   | 2.03253  | 2.03253  |
| Pigq     | Pigq-005     | 0.0121243   | 4.44926  | 4.44926  |
| Pigs     | Pigs-001     | 2.23152e-06 | 0.541479 | -1.84679 |
| Pigt     | Pigt-001     | 0.0295313   | 0.788419 | -1.26836 |
| Pigu     | Pigu-003     | 0.0191726   | 0.680208 | -1.47014 |
| Pigu     | Pigu-001     | 0.00582652  | 0.838773 | -1.19222 |
| Pigx     | Pigx-001     | 0.0171013   | 0.562617 | -1.77741 |
| Pigx     | Pigx-008     | 0.0303965   | 2.24369  | 2.24369  |
| Pik3c2a  | Pik3c2a-001  | 0.000218503 | 1.28671  | 1.28671  |
| Pik3c2a  | Pik3c2a-006  | 0.00974307  | 1.80971  | 1.80971  |
| Pik3cb   | Pik3cb-002   | 0.0127167   | 1.27152  | 1.27152  |
| Pik3cd   | Pik3cd-008   | 0.0349497   | 0.479326 | -2.08626 |
| Pik3ip1  | Pik3ip1-001  | 0.00872629  | 0.423515 | -2.36119 |
| Pik3r1   | Pik3r1-001   | 0.00192832  | 0.657286 | -1.52141 |
| Pik3r2   | Pik3r2-001   | 0.0220177   | 1.43394  | 1.43394  |
| Pik3r3   | Pik3r3-001   | 0.0163207   | 0.778346 | -1.28477 |
| Pikfyve  | Pikfyve-001  | 0.013169    | 0.789731 | -1.26625 |
| Pim1     | Pim1-001     | 0.00932178  | 0.756956 | -1.32108 |
| Pim2     | Pim2-001     | 0.0345158   | 1.16285  | 1.16285  |
| Pim3     | Pim3-201     | 0.00722347  | 1.37794  | 1.37794  |
| Pip4k2b  | Pip4k2b-001  | 0.0111627   | 0.788636 | -1.26801 |
| Pip4k2c  | Pip4k2c-201  | 0.0198482   | 0.760304 | -1.31526 |
| Pip5k1a  | Pip5k1a-004  | 0.0145797   | 0.810294 | -1.23412 |
| Pir      | Pir-001      | 0.0431051   | 1.31764  | 1.31764  |
| Pirt     | Pirt-001     | 8.50788e-05 | 0.524771 | -1.90559 |
| Pisd     | Pisd-005     | 0.00184139  | 0.148234 | -6.7461  |
| Pisd     | Pisd-003     | 0.0384464   | 0.349084 | -2.86464 |
| Pisd     | Pisd-013     | 0.0312047   | 0.851812 | -1.17397 |
| Pisd-ps1 | Pisd-ps1-003 | 0.00197567  | 0.404815 | -2.47027 |
| Pitpna   | Pitpna-202   | 0.0442583   | 0.430811 | -2.3212  |
| Pitpnb   | Pitpnb-001   | 0.0324589   | 1.30204  | 1.30204  |
| Pitpnc1  | Pitpnc1-004  | 0.0105591   | 18.1035  | 18.1035  |
| Pitpnm1  | Pitpnm1-001  | 0.000656572 | 0.387238 | -2.58239 |
| Pitpnm2  | Pitpnm2-002  | 0.0262763   | 164.064  | 164.064  |
| Piwil4   | Piwil4-002   | 0.00693518  | 1.55809  | 1.55809  |
| Pkd1     | Pkd1-201     | 0.00866261  | 0.865682 | -1.15516 |

|          |              |             |          |          |
|----------|--------------|-------------|----------|----------|
| Pkd2     | Pkd2-001     | 0.0226638   | 0.685406 | -1.45899 |
| Pkhd1l1  | Pkhd1l1-201  | 0.0294153   | 2.11255  | 2.11255  |
| Pkhd1l1  | Pkhd1l1-202  | 0.0232116   | 2.91458  | 2.91458  |
| Pkia     | Pkia-001     | 0.0355987   | 1.48916  | 1.48916  |
| Pkig     | Pkig-001     | 0.0194393   | 0.726581 | -1.37631 |
| Pkn3     | Pkn3-005     | 0.0124472   | 0.182632 | -5.47551 |
| Pkn3     | Pkn3-001     | 0.0168569   | 0.455333 | -2.1962  |
| Pknox1   | Pknox1-001   | 0.0067602   | 0.829281 | -1.20586 |
| Pkp2     | Pkp2-001     | 0.0265834   | 1.40232  | 1.40232  |
| Pla2g12a | Pla2g12a-001 | 0.00518777  | 1.26245  | 1.26245  |
| Pla2g4b  | Pla2g4b-002  | 0.0316346   | 0.303609 | -3.29371 |
| Pla2g5   | Pla2g5-001   | 0.0264451   | 191.885  | 191.885  |
| Plaa     | Plaa-003     | 0.0198302   | 0.714917 | -1.39876 |
| Platr16  | Platr16-001  | 0.00146483  | 0.272165 | -3.67424 |
| Plbd2    | Plbd2-001    | 0.00139838  | 0.794922 | -1.25798 |
| Plcb3    | Plcb3-201    | 0.000496395 | 0.54433  | -1.83712 |
| Plcg1    | Plcg1-005    | 0.0370387   | 0.398022 | -2.51242 |
| Plcg2    | Plcg2-201    | 0.017967    | 5.39466  | 5.39466  |
| Plcl2    | Plcl2-201    | 0.00345572  | 1.178    | 1.178    |
| Plcx3    | Plcx3-001    | 0.0123542   | 0.728886 | -1.37196 |
| Pld6     | Pld6-002     | 0.0426774   | 2.87023  | 2.87023  |
| Plec     | Plec-201     | 0.00634399  | 0.485985 | -2.05768 |
| Plec     | Plec-205     | 0.0286806   | 0.501699 | -1.99323 |
| Plec     | Plec-204     | 0.00519383  | 0.555643 | -1.79972 |
| Plec     | Plec-005     | 0.00328548  | 0.573485 | -1.74372 |
| Plec     | Plec-013     | 0.00324707  | 0.596859 | -1.67544 |
| Plec     | Plec-003     | 0.0203898   | 0.60046  | -1.66539 |
| Plec     | Plec-202     | 0.000673128 | 0.60795  | -1.64487 |
| Plec     | Plec-006     | 0.0307817   | 0.716889 | -1.39492 |
| Plek2    | Plek2-001    | 0.0336854   | 2.01631  | 2.01631  |
| Plekha1  | Plekha1-002  | 0.00996054  | 1.37362  | 1.37362  |
| Plekha2  | Plekha2-001  | 0.000534695 | 0.533792 | -1.87339 |
| Plekha2  | Plekha2-003  | 0.0465102   | 7.51379  | 7.51379  |
| Plekha3  | Plekha3-001  | 0.00291184  | 0.757278 | -1.32052 |
| Plekha5  | Plekha5-001  | 0.0163885   | 0.628502 | -1.59109 |
| Plekha6  | Plekha6-001  | 0.00400165  | 0.650325 | -1.53769 |
| Plekha6  | Plekha6-201  | 0.0382605   | 0.700013 | -1.42854 |
| Plekha6  | Plekha6-004  | 0.00808752  | 1.44078  | 1.44078  |
| Plekha6  | Plekha6-003  | 0.0273498   | 1.6429   | 1.6429   |
| Plekha6  | Plekha6-002  | 0.00106884  | 9.65499  | 9.65499  |
| Plekha7  | Plekha7-006  | 0.0217519   | 0.69143  | -1.44628 |
| Plekha2  | Plekha2-001  | 0.0442592   | 1.19309  | 1.19309  |
| Plekha1  | Plekha1-003  | 0.014738    | 0.396862 | -2.51976 |

|         |             |             |          |          |
|---------|-------------|-------------|----------|----------|
| Plekhg2 | Plekhg2-006 | 0.00185024  | 0.483656 | -2.06759 |
| Plekhg2 | Plekhg2-003 | 0.0472972   | 0.59307  | -1.68614 |
| Plekhm3 | Plekhm3-006 | 0.032972    | 5.88943  | 5.88943  |
| Plgrkt  | Plgrkt-002  | 0.0147481   | 2.44609  | 2.44609  |
| Plin4   | Plin4-201   | 0.0101178   | 1.46669  | 1.46669  |
| Plin4   | Plin4-001   | 0.0101175   | 1.4667   | 1.4667   |
| Plk3    | Plk3-001    | 0.046325    | 1.53955  | 1.53955  |
| Plod1   | Plod1-001   | 0.00169088  | 0.810284 | -1.23413 |
| Plod2   | Plod2-002   | 0.00426247  | 0.725477 | -1.3784  |
| Plod3   | Plod3-006   | 0.0364985   | 0.799984 | -1.25002 |
| Plxnb1  | Plxnb1-001  | 0.0240449   | 0.660378 | -1.51428 |
| Plxnb2  | Plxnb2-201  | 8.48707e-05 | 0.703391 | -1.42168 |
| Plxnb2  | Plxnb2-001  | 0.00112407  | 0.728425 | -1.37283 |
| Pmch    | Pmch-001    | 0.0409679   | 0.531602 | -1.8811  |
| Pmpca   | Pmpca-004   | 0.0295628   | 1.75809  | 1.75809  |
| Pmpcb   | Pmpcb-001   | 0.0218855   | 1.1124   | 1.1124   |
| Pms1    | Pms1-001    | 7.29994e-05 | 1.57022  | 1.57022  |
| Pms1    | Pms1-003    | 0.0174673   | 2.38946  | 2.38946  |
| Pms2    | Pms2-014    | 0.0373512   | 0.288583 | -3.46521 |
| Pnizr   | Pnizr-006   | 0.00559246  | 2.25875  | 2.25875  |
| Pnkd    | Pnkd-004    | 0.0315816   | 0.604511 | -1.65423 |
| Pnkd    | Pnkd-003    | 0.0341003   | 0.793249 | -1.26064 |
| Pnmal1  | Pnmal1-001  | 0.000256813 | 1.2481   | 1.2481   |
| Pnpla2  | Pnpla2-006  | 0.0304867   | 0.533535 | -1.87429 |
| Pnpla2  | Pnpla2-005  | 0.0114388   | 0.546449 | -1.83    |
| Pnpla2  | Pnpla2-002  | 0.00485665  | 0.594015 | -1.68346 |
| Pnpla7  | Pnpla7-001  | 0.0272937   | 1.43574  | 1.43574  |
| Poc1b   | Poc1b-003   | 0.00840233  | 0.619377 | -1.61453 |
| Poc5    | Poc5-201    | 0.0422027   | 1.18067  | 1.18067  |
| Pogk    | Pogk-003    | 0.0246928   | 1.50318  | 1.50318  |
| Pogk    | Pogk-001    | 0.035111    | 1.8703   | 1.8703   |
| Poglut1 | Poglut1-005 | 0.0135629   | 0.664898 | -1.50399 |
| Pogz    | Pogz-010    | 0.00283257  | 0.256458 | -3.89927 |
| Pogz    | Pogz-004    | 0.0429583   | 1.87044  | 1.87044  |
| Polb    | Polb-201    | 2.05382e-05 | 1.28346  | 1.28346  |
| Pold3   | Pold3-002   | 0.0175666   | 2.89466  | 2.89466  |
| Poldip2 | Poldip2-002 | 0.0303104   | 1.64836  | 1.64836  |
| Polg    | Polg-004    | 0.0368296   | 0.515469 | -1.93998 |
| Polg    | Polg-001    | 0.0099976   | 0.631425 | -1.58372 |
| Polh    | Polh-201    | 0.00770376  | 1.19796  | 1.19796  |
| Poli    | Poli-003    | 0.00838478  | 1.78514  | 1.78514  |
| Polk    | Polk-202    | 0.00247116  | 2.26326  | 2.26326  |
| Polr1c  | Polr1c-001  | 0.00557569  | 1.37238  | 1.37238  |



|          |              |             |           |          |
|----------|--------------|-------------|-----------|----------|
| Polr1c   | Polr1c-007   | 0.0421662   | 1.90768   | 1.90768  |
| Polr2c   | Polr2c-201   | 0.0382882   | 1.24037   | 1.24037  |
| Polr2e   | Polr2e-003   | 0.0382656   | 0.390957  | -2.55783 |
| Polr2e   | Polr2e-001   | 0.000288314 | 0.68605   | -1.45762 |
| Polr2h   | Polr2h-001   | 0.0373219   | 0.868569  | -1.15132 |
| Polr2k   | Polr2k-002   | 0.0319672   | 0.783472  | -1.27637 |
| Polrmt   | Polrmt-003   | 0.0444584   | 1.80014   | 1.80014  |
| Pomc     | Pomc-201     | 0.0025404   | 1.86415   | 1.86415  |
| Pomgnt1  | Pomgnt1-012  | 0.0315118   | 1.95044   | 1.95044  |
| Pomt1    | Pomt1-012    | 0.000493601 | 0.116628  | -8.57428 |
| Pomt1    | Pomt1-001    | 0.00850847  | 0.559127  | -1.7885  |
| Pop5     | Pop5-005     | 0.041371    | 1.78403   | 1.78403  |
| Popdc2   | Popdc2-003   | 0.0498642   | 0.0540611 | -18.4976 |
| Popdc3   | Popdc3-002   | 0.00167297  | 3.27784   | 3.27784  |
| Pot1a    | Pot1a-001    | 0.000514379 | 1.43091   | 1.43091  |
| Pot1a    | Pot1a-201    | 0.0161407   | 1.956     | 1.956    |
| Pot1b    | Pot1b-201    | 0.00292472  | 1.29874   | 1.29874  |
| Pou2f1   | Pou2f1-201   | 0.034869    | 0.8816    | -1.1343  |
| Ppap2a   | Ppap2a-201   | 0.00128973  | 0.62632   | -1.59663 |
| Ppap2a   | Ppap2a-202   | 0.0119948   | 0.686706  | -1.45623 |
| Ppap2c   | Ppap2c-001   | 0.0249194   | 0.699712  | -1.42916 |
| Ppapdc1b | Ppapdc1b-005 | 0.042428    | 3.9687    | 3.9687   |
| Ppapdc2  | Ppapdc2-001  | 0.0295856   | 1.3944    | 1.3944   |
| Ppara    | Ppara-001    | 0.0178378   | 2.45625   | 2.45625  |
| Ppfia1   | Ppfia1-004   | 0.0444694   | 0.736338  | -1.35807 |
| Ppfia4   | Ppfia4-007   | 0.0136698   | 2.90238   | 2.90238  |
| Ppfibp1  | Ppfibp1-005  | 0.00706687  | 0.570194  | -1.75379 |
| Ppfibp1  | Ppfibp1-001  | 0.00879466  | 0.693115  | -1.44276 |
| Ppfibp1  | Ppfibp1-002  | 0.013407    | 0.698384  | -1.43188 |
| Ppfibp2  | Ppfibp2-201  | 0.0375422   | 1.19746   | 1.19746  |
| Pphln1   | Pphln1-201   | 0.00882753  | 1.74489   | 1.74489  |
| Ppig     | Ppig-002     | 0.00573552  | 1.18605   | 1.18605  |
| Ppig     | Ppig-011     | 0.00695324  | 1.44332   | 1.44332  |
| Ppig     | Ppig-005     | 0.0308728   | 3.03128   | 3.03128  |
| Ppil3    | Ppil3-006    | 0.0367681   | 0.356219  | -2.80727 |
| Ppil4    | Ppil4-001    | 0.00513841  | 1.49048   | 1.49048  |
| Ppil4    | Ppil4-003    | 0.000281677 | 1.92739   | 1.92739  |
| Ppip5k1  | Ppip5k1-005  | 0.0274772   | 1.7169    | 1.7169   |
| Ppip5k1  | Ppip5k1-014  | 0.0244367   | 2.60642   | 2.60642  |
| Ppm1b    | Ppm1b-202    | 0.00136456  | 0.711193  | -1.40609 |
| Ppm1e    | Ppm1e-001    | 0.000673669 | 1.16053   | 1.16053  |
| Ppm1h    | Ppm1h-002    | 0.035298    | 1.69104   | 1.69104  |
| Ppm1l    | Ppm1l-001    | 0.00159763  | 0.56943   | -1.75614 |

|          |              |             |             |              |
|----------|--------------|-------------|-------------|--------------|
| Ppm1m    | Ppm1m-004    | 0.00924153  | 0.40506     | -2.46877     |
| Ppox     | Ppox-001     | 0.0354198   | 0.69854     | -1.43156     |
| Ppp1r12b | Ppp1r12b-004 | 0.00624243  | 3.7998      | 3.7998       |
| Ppp1r13b | Ppp1r13b-201 | 0.0116816   | 0.793713    | -1.2599      |
| Ppp1r14b | Ppp1r14b-201 | 0.000873986 | 0.398838    | -2.50729     |
| Ppp1r14c | Ppp1r14c-201 | 0.000286673 | 0.759462    | -1.31672     |
| Ppp1r15a | Ppp1r15a-001 | 0.000118597 | 2.57319     | 2.57319      |
| Ppp1r16b | Ppp1r16b-003 | 0.00422136  | 2.29483     | 2.29483      |
| Ppp1r18  | Ppp1r18-001  | 0.0425805   | 0.700026    | -1.42852     |
| Ppp1r2   | Ppp1r2-002   | 0.045735    | 1.26188     | 1.26188      |
| Ppp1r32  | Ppp1r32-201  | 0.0366854   | 2.22046     | 2.22046      |
| Ppp1r35  | Ppp1r35-001  | 0.0407803   | 0.72287     | -1.38338     |
| Ppp1r3b  | Ppp1r3b-201  | 0.0493387   | 1.33476     | 1.33476      |
| Ppp1r9a  | Ppp1r9a-001  | 0.0168723   | 0.831137    | -1.20317     |
| Ppp2r1a  | Ppp2r1a-001  | 0.0227159   | 0.876119    | -1.1414      |
| Ppp2r2a  | Ppp2r2a-201  | 0.000223189 | 1.27592     | 1.27592      |
| Ppp2r3c  | Ppp2r3c-201  | 0.0305524   | 1.18779     | 1.18779      |
| Ppp2r3d  | Ppp2r3d-003  | 0.00196742  | 0.651263    | -1.53548     |
| Ppp2r4   | Ppp2r4-003   | 0.0108655   | 0.436862    | -2.28905     |
| Ppp2r4   | Ppp2r4-001   | 0.00944473  | 0.637216    | -1.56933     |
| Ppp2r5a  | Ppp2r5a-001  | 0.00385526  | 1.23788     | 1.23788      |
| Ppp2r5a  | Ppp2r5a-005  | 0.0421492   | 2.83666     | 2.83666      |
| Ppp3ca   | Ppp3ca-001   | 0.0184451   | 0.841934    | -1.18774     |
| Ppp5c    | Ppp5c-004    | 0.0269859   | 3.24653e-07 | -3.08021e+06 |
| Ppp6c    | Ppp6c-001    | 0.00297795  | 0.727747    | -1.3741      |
| Ppp6c    | Ppp6c-003    | 0.00046811  | 1.53608     | 1.53608      |
| Ppp6c    | Ppp6c-005    | 0.00323567  | 1.96996     | 1.96996      |
| Ppp6r3   | Ppp6r3-203   | 0.00862468  | 1.4619      | 1.4619       |
| Ppt1     | Ppt1-001     | 0.0015396   | 0.659407    | -1.51651     |
| Pqbp1    | Pqbp1-003    | 0.0260586   | 1.60033     | 1.60033      |
| Pqlc2    | Pqlc2-003    | 0.000277554 | 2.94704     | 2.94704      |
| Praf2    | Praf2-001    | 0.0158262   | 1.31111     | 1.31111      |
| Prc1     | Prc1-013     | 0.0223485   | 0.463502    | -2.15749     |
| Prdm11   | Prdm11-001   | 0.040142    | 0.397887    | -2.51328     |
| Prdm16   | Prdm16-013   | 0.0325189   | 0.00608354  | -164.378     |
| Prdm2    | Prdm2-001    | 0.00723628  | 1.1306      | 1.1306       |
| Prdm9    | Prdm9-201    | 0.0156151   | 1.51793     | 1.51793      |
| Prdx2    | Prdx2-004    | 0.00357214  | 0.222082    | -4.50285     |
| Prdx2    | Prdx2-003    | 0.021456    | 0.609614    | -1.64038     |
| Prdx4    | Prdx4-002    | 0.0189841   | 0.761878    | -1.31255     |
| Prdx4    | Prdx4-001    | 0.0174629   | 0.888405    | -1.12561     |
| Preb     | Preb-003     | 0.0326582   | 0.177096    | -5.64665     |
| Preb     | Preb-008     | 0.000196965 | 1.19556     | 1.19556      |

|          |              |             |           |          |
|----------|--------------|-------------|-----------|----------|
| Preb     | Preb-007     | 0.0362064   | 2.80536   | 2.80536  |
| Prex1    | Prex1-001    | 0.000979655 | 0.6847    | -1.46049 |
| Prickle2 | Prickle2-003 | 0.0172594   | 0.641453  | -1.55896 |
| Prim1    | Prim1-002    | 0.000564982 | 1.92502   | 1.92502  |
| Prkag2   | Prkag2-010   | 0.0124353   | 1.63845   | 1.63845  |
| Prkag2   | Prkag2-001   | 0.0307758   | 1.88227   | 1.88227  |
| Prkar2b  | Prkar2b-001  | 0.000728208 | 0.595116  | -1.68034 |
| Prkca    | Prkca-002    | 0.0236721   | 3.12317   | 3.12317  |
| Prkcd    | Prkcd-202    | 0.0412313   | 0.496426  | -2.0144  |
| Prkcd    | Prkcd-001    | 0.0287422   | 0.735164  | -1.36024 |
| Prkce    | Prkce-001    | 0.00728615  | 1.19344   | 1.19344  |
| Prkce    | Prkce-003    | 0.0381406   | 17.8456   | 17.8456  |
| Prkcq    | Prkcq-002    | 0.0351565   | 0.0374414 | -26.7084 |
| Prkcz    | Prkcz-001    | 0.000361575 | 2.0631    | 2.0631   |
| Prkrip1  | Prkrip1-004  | 0.0037895   | 1.64921   | 1.64921  |
| Prkx     | Prkx-001     | 0.000177895 | 0.470512  | -2.12535 |
| Prmt10   | Prmt10-201   | 0.0162105   | 1.3429    | 1.3429   |
| Prmt3    | Prmt3-001    | 0.000224663 | 1.21739   | 1.21739  |
| Prmt7    | Prmt7-002    | 0.020203    | 0.476309  | -2.09948 |
| Prmt7    | Prmt7-001    | 0.0457439   | 1.14269   | 1.14269  |
| Procr    | Procr-001    | 0.0144659   | 0.485187  | -2.06106 |
| Prokr2   | Prokr2-001   | 0.0335295   | 0.131225  | -7.62051 |
| Prorsd1  | Prorsd1-001  | 0.000241463 | 1.78737   | 1.78737  |
| Prosc    | Prosc-202    | 0.0157911   | 1.27303   | 1.27303  |
| Proser3  | Proser3-002  | 0.00998343  | 1.44503   | 1.44503  |
| Prpf18   | Prpf18-002   | 0.000681666 | 2.20856   | 2.20856  |
| Prpf38b  | Prpf38b-007  | 0.0118904   | 0.762622  | -1.31127 |
| Prpf40a  | Prpf40a-005  | 0.000986922 | 1.26447   | 1.26447  |
| Prpf40a  | Prpf40a-002  | 0.0202557   | 1.2882    | 1.2882   |
| Prpf6    | Prpf6-201    | 0.00181183  | 1.39471   | 1.39471  |
| Prpf8    | Prpf8-001    | 0.0450205   | 1.33603   | 1.33603  |
| Prpf8    | Prpf8-002    | 0.00476283  | 1.519     | 1.519    |
| Prps1    | Prps1-001    | 0.00531503  | 0.71643   | -1.39581 |
| Prpsap1  | Prpsap1-006  | 0.00994923  | 1.62492   | 1.62492  |
| Prpsap2  | Prpsap2-201  | 0.011844    | 2.66359   | 2.66359  |
| Prr13    | Prr13-001    | 0.0219713   | 0.404354  | -2.47308 |
| Prr14    | Prr14-002    | 0.0383922   | 0.680511  | -1.46948 |
| Prr22    | Prr22-001    | 0.0356311   | 2.55721   | 2.55721  |
| Prr7     | Prr7-201     | 0.0225239   | 1.77563   | 1.77563  |
| Prrc2a   | Prrc2a-005   | 0.000722505 | 0.595589  | -1.67901 |
| Prrc2a   | Prrc2a-006   | 0.0339054   | 1.82735   | 1.82735  |
| Prrc2b   | Prrc2b-001   | 0.00275829  | 0.532488  | -1.87798 |
| Prrc2b   | Prrc2b-002   | 0.0155123   | 2.89609   | 2.89609  |

|        |            |            |           |          |
|--------|------------|------------|-----------|----------|
| Prrc2c | Prrc2c-003 | 0.0302501  | 1.22007   | 1.22007  |
| Prrc2c | Prrc2c-005 | 0.0140814  | 1.42757   | 1.42757  |
| Prrc2c | Prrc2c-006 | 0.0261456  | 1.43419   | 1.43419  |
| Prrg2  | Prrg2-201  | 0.0164742  | 1.49284   | 1.49284  |
| Prrt2  | Prrt2-004  | 0.027045   | 75.7807   | 75.7807  |
| Prrt3  | Prrt3-003  | 0.0321974  | 3.27647   | 3.27647  |
| Prrxl1 | Prrxl1-002 | 0.0164162  | 3.09219   | 3.09219  |
| Prss16 | Prss16-004 | 0.0395807  | 0.36135   | -2.7674  |
| Prss33 | Prss33-003 | 0.0268621  | 0.304352  | -3.28567 |
| Prss35 | Prss35-201 | 0.0478574  | 6.05127   | 6.05127  |
| Prss36 | Prss36-002 | 0.0330097  | 4.05072   | 4.05072  |
| Prss41 | Prss41-003 | 0.0362909  | 1.33156   | 1.33156  |
| Prtg   | Prtg-001   | 0.00119125 | 0.776674  | -1.28754 |
| Prx    | Prx-002    | 0.0207306  | 0.168603  | -5.93109 |
| Psap   | Psap-201   | 0.0095693  | 0.559679  | -1.78674 |
| Psat1  | Psat1-001  | 0.00341281 | 1.1406    | 1.1406   |
| Psat1  | Psat1-002  | 0.0102324  | 1.72985   | 1.72985  |
| Psat1  | Psat1-007  | 0.0292817  | 2.79721   | 2.79721  |
| Psd2   | Psd2-006   | 0.0204224  | 7.8208    | 7.8208   |
| Psd4   | Psd4-201   | 0.0256121  | 0.0569595 | -17.5563 |
| Psd4   | Psd4-002   | 0.0116943  | 865.979   | 865.979  |
| Psenen | Psenen-201 | 0.00893916 | 1.18497   | 1.18497  |
| Psg16  | Psg16-002  | 0.00950884 | 5.43245   | 5.43245  |
| Psg29  | Psg29-001  | 0.00942673 | 2.08298   | 2.08298  |
| Psip1  | Psip1-002  | 0.0185377  | 1.27483   | 1.27483  |
| Psip1  | Psip1-008  | 0.0337292  | 2.59203   | 2.59203  |
| Psm1   | Psm1-002   | 0.0196628  | 1.50677   | 1.50677  |
| Psm4   | Psm4-003   | 0.00521908 | 2.40105   | 2.40105  |
| Psm6   | Psm6-201   | 0.0466136  | 1.07665   | 1.07665  |
| Psm6   | Psm6-001   | 0.00380752 | 1.23893   | 1.23893  |
| Psm6   | Psm6-003   | 0.0143136  | 1.36746   | 1.36746  |
| Psm7   | Psm7-001   | 0.00623748 | 0.831774  | -1.20225 |
| Psm8   | Psm8-001   | 0.00533905 | 0.794649  | -1.25842 |
| Psmc3  | Psmc3-010  | 0.0364235  | 1.43017   | 1.43017  |
| Psmc3  | Psmc3-002  | 0.0383154  | 1.56422   | 1.56422  |
| Psmc6  | Psmc6-201  | 0.00141194 | 1.22165   | 1.22165  |
| Psm11  | Psm11-004  | 0.009063   | 1.50452   | 1.50452  |
| Psm11  | Psm11-009  | 0.00197399 | 2.19046   | 2.19046  |
| Psm4   | Psm4-007   | 0.0054822  | 2.89363   | 2.89363  |
| Psm5   | Psm5-002   | 0.0294964  | 1.41337   | 1.41337  |
| Psm6   | Psm6-003   | 0.0481811  | 1.62978   | 1.62978  |
| Psm9   | Psm9-005   | 0.00711523 | 1.43725   | 1.43725  |
| Psm1   | Psm1-010   | 0.0260149  | 0.683595  | -1.46285 |

|        |            |             |           |          |
|--------|------------|-------------|-----------|----------|
| Psmc2  | Psmc2-201  | 0.0197416   | 0.564058  | -1.77287 |
| Psmc2  | Psmc2-001  | 0.0358325   | 0.781098  | -1.28025 |
| Psmf1  | Psmf1-006  | 0.00324736  | 1.54626   | 1.54626  |
| Psmg4  | Psmg4-002  | 0.0447575   | 3.3722    | 3.3722   |
| Psph   | Psph-001   | 0.00185148  | 1.76022   | 1.76022  |
| Psph   | Psph-004   | 0.00729966  | 2.32323   | 2.32323  |
| Psph   | Psph-007   | 0.00476651  | 2.72016   | 2.72016  |
| Pstk   | Pstk-001   | 0.0131554   | 1.6029    | 1.6029   |
| Ptar1  | Ptar1-201  | 0.0233669   | 1.2734    | 1.2734   |
| Ptbp1  | Ptbp1-008  | 0.0190229   | 1.56258   | 1.56258  |
| Ptbp1  | Ptbp1-010  | 0.0191219   | 2.49566   | 2.49566  |
| Ptbp1  | Ptbp1-013  | 0.00607067  | 2.81957   | 2.81957  |
| Ptbp2  | Ptbp2-201  | 1.14131e-05 | 0.711864  | -1.40476 |
| Ptcd2  | Ptcd2-201  | 0.0166538   | 1.4035    | 1.4035   |
| Ptcd3  | Ptcd3-010  | 0.0265188   | 1.36854   | 1.36854  |
| Ptch1  | Ptch1-005  | 0.0108161   | 1.11043   | 1.11043  |
| Ptdss2 | Ptdss2-001 | 0.0400051   | 0.825499  | -1.21139 |
| Pten   | Pten-001   | 3.98366e-05 | 0.501303  | -1.9948  |
| Ptges3 | Ptges3-002 | 0.00789106  | 1.24421   | 1.24421  |
| Ptges3 | Ptges3-003 | 0.034022    | 1.60852   | 1.60852  |
| Ptgis  | Ptgis-001  | 0.0482345   | 0.20467   | -4.88592 |
| Ptgs1  | Ptgs1-004  | 0.0195455   | 0.669748  | -1.4931  |
| Ptov1  | Ptov1-201  | 0.000825935 | 0.693573  | -1.44181 |
| Ptp4a1 | Ptp4a1-004 | 0.0117698   | 0.214392  | -4.66435 |
| Ptp4a1 | Ptp4a1-006 | 0.0173848   | 1.30972   | 1.30972  |
| Ptp4a1 | Ptp4a1-005 | 0.0152358   | 1.34433   | 1.34433  |
| Ptp4a2 | Ptp4a2-201 | 0.0283946   | 0.646783  | -1.54611 |
| Ptp4a2 | Ptp4a2-006 | 0.00131631  | 1.74662   | 1.74662  |
| Ptpn1  | Ptpn1-006  | 0.0147387   | 4.22421   | 4.22421  |
| Ptpn11 | Ptpn11-002 | 0.010912    | 0.584275  | -1.71152 |
| Ptpn14 | Ptpn14-002 | 0.0258181   | 10448     | 10448    |
| Ptpn2  | Ptpn2-001  | 0.0090032   | 1.31457   | 1.31457  |
| Ptpn22 | Ptpn22-001 | 0.0245007   | 0.0865288 | -11.5568 |
| Ptpn3  | Ptpn3-001  | 0.000160322 | 1.42021   | 1.42021  |
| Ptpn4  | Ptpn4-001  | 2.4082e-05  | 0.795716  | -1.25673 |
| Ptpn4  | Ptpn4-003  | 0.0168885   | 3.6185    | 3.6185   |
| Ptpn4  | Ptpn4-002  | 0.0133238   | 7.12405   | 7.12405  |
| Ptpre  | Ptpre-201  | 0.00280179  | 0.710011  | -1.40843 |
| Ptprf  | Ptprf-001  | 0.00573438  | 0.859664  | -1.16325 |
| Ptprg  | Ptprg-001  | 0.000256577 | 0.692819  | -1.44338 |
| Ptprg  | Ptprg-002  | 0.0114979   | 1.56448   | 1.56448  |
| Ptprm  | Ptprm-201  | 0.026925    | 2.39396   | 2.39396  |
| Ptprn2 | Ptprn2-002 | 0.00437419  | 0.688019  | -1.45345 |

|         |             |             |          |          |
|---------|-------------|-------------|----------|----------|
| Ptprv   | Ptprv-010   | 0.0472716   | 0.357638 | -2.79612 |
| Ptrh1   | Ptrh1-001   | 0.00532472  | 1.66456  | 1.66456  |
| Pum2    | Pum2-005    | 0.00387796  | 2.25794  | 2.25794  |
| Pum2    | Pum2-003    | 0.0215924   | 2.54105  | 2.54105  |
| Pura    | Pura-001    | 0.00777714  | 0.856906 | -1.16699 |
| Purb    | Purb-001    | 0.0260856   | 0.685659 | -1.45845 |
| Pus1    | Pus1-004    | 0.0481652   | 0.516061 | -1.93775 |
| Pus1    | Pus1-003    | 0.0289742   | 1.70205  | 1.70205  |
| Pus10   | Pus10-007   | 0.0230461   | 4.43418  | 4.43418  |
| Pus3    | Pus3-001    | 0.00848104  | 1.67606  | 1.67606  |
| Pvr     | Pvr-001     | 0.045132    | 1.19799  | 1.19799  |
| Pvrl1   | Pvrl1-201   | 0.00309072  | 0.809519 | -1.2353  |
| Pvrl2   | Pvrl2-201   | 0.0482338   | 0.624927 | -1.60019 |
| Pvrl3   | Pvrl3-003   | 0.0066026   | 0.701807 | -1.42489 |
| Pvrl4   | Pvrl4-001   | 0.0014066   | 2.9431   | 2.9431   |
| Pvrl4   | Pvrl4-002   | 0.00140665  | 2.9431   | 2.9431   |
| Pwwp2a  | Pwwp2a-004  | 0.00134414  | 0.545284 | -1.83391 |
| Pwwp2a  | Pwwp2a-002  | 0.000734731 | 0.698614 | -1.43141 |
| Pwwp2a  | Pwwp2a-001  | 0.027783    | 0.810993 | -1.23306 |
| Pxdn    | Pxdn-001    | 6.80436e-05 | 0.632961 | -1.57988 |
| Pxylp1  | Pxylp1-001  | 0.00867656  | 1.8099   | 1.8099   |
| Pycr1   | Pycr1-005   | 0.0364071   | 16271.6  | 16271.6  |
| Pygb    | Pygb-001    | 0.027221    | 0.881676 | -1.1342  |
| Qars    | Qars-009    | 0.00989361  | 0.238888 | -4.18606 |
| Qars    | Qars-003    | 0.0490724   | 0.653747 | -1.52964 |
| Qars    | Qars-001    | 0.0470331   | 0.768248 | -1.30166 |
| Qars    | Qars-007    | 0.0456381   | 3.93366  | 3.93366  |
| Qdpr    | Qdpr-007    | 0.0411725   | 4.63481  | 4.63481  |
| Qk      | Qk-201      | 0.0242405   | 1.19431  | 1.19431  |
| Qrfp    | Qrfp-001    | 0.0343714   | 0.402344 | -2.48543 |
| Qrich1  | Qrich1-011  | 0.00640317  | 0.373562 | -2.67693 |
| Qrsl1   | Qrsl1-001   | 0.0283203   | 1.40334  | 1.40334  |
| R3hcc1  | R3hcc1-001  | 0.0172048   | 1.42573  | 1.42573  |
| R3hcc1l | R3hcc1l-001 | 0.0371827   | 1.16635  | 1.16635  |
| R3hcc1l | R3hcc1l-003 | 0.00612638  | 2.05416  | 2.05416  |
| R3hdm1  | R3hdm1-010  | 0.00201816  | 0.360181 | -2.77639 |
| R3hdm1  | R3hdm1-001  | 0.00278847  | 1.22694  | 1.22694  |
| R3hdm2  | R3hdm2-018  | 0.0213214   | 0.191851 | -5.21238 |
| R3hdm4  | R3hdm4-201  | 4.13364e-05 | 0.617108 | -1.62046 |
| R74862  | R74862-003  | 0.0354555   | 0.175809 | -5.68798 |
| Rab10os | Rab10os-001 | 0.00195464  | 1.2637   | 1.2637   |
| Rab10os | Rab10os-009 | 0.0117642   | 1.80843  | 1.80843  |
| Rab10os | Rab10os-010 | 0.0315391   | 2.11662  | 2.11662  |

|          |              |             |             |             |
|----------|--------------|-------------|-------------|-------------|
| Rab11a   | Rab11a-001   | 0.00169224  | 0.652013    | -1.53371    |
| Rab13    | Rab13-001    | 0.0204097   | 0.720158    | -1.38858    |
| Rab1a    | Rab1a-002    | 6.97805e-05 | 1.53281     | 1.53281     |
| Rab22a   | Rab22a-003   | 0.00276615  | 1.50726     | 1.50726     |
| Rab23    | Rab23-006    | 0.0386981   | 2.06418     | 2.06418     |
| Rab23    | Rab23-009    | 0.0354257   | 2.9069      | 2.9069      |
| Rab24    | Rab24-201    | 0.0132626   | 0.708997    | -1.41044    |
| Rab26    | Rab26-005    | 0.0440791   | 2.25336     | 2.25336     |
| Rab2b    | Rab2b-003    | 0.0216484   | 1.95761     | 1.95761     |
| Rab2b    | Rab2b-008    | 0.0243493   | 318.166     | 318.166     |
| Rab32    | Rab32-001    | 0.000597583 | 1.62424     | 1.62424     |
| Rab33a   | Rab33a-001   | 0.00692844  | 2.05252     | 2.05252     |
| Rab34    | Rab34-004    | 0.000726291 | 4.05201e+06 | 4.05201e+06 |
| Rab36    | Rab36-004    | 0.00453162  | 1.51923     | 1.51923     |
| Rab39    | Rab39-001    | 0.0374031   | 1.10904     | 1.10904     |
| Rab39b   | Rab39b-001   | 0.00312792  | 1.43674     | 1.43674     |
| Rab3gap1 | Rab3gap1-001 | 5.622e-05   | 1.29378     | 1.29378     |
| Rab3gap2 | Rab3gap2-001 | 0.0400497   | 0.655069    | -1.52656    |
| Rab3gap2 | Rab3gap2-003 | 0.0182783   | 1.16004     | 1.16004     |
| Rab3ip   | Rab3ip-201   | 0.00959831  | 1.17711     | 1.17711     |
| Rab4b    | Rab4b-001    | 0.00110185  | 0.792722    | -1.26148    |
| Rab5b    | Rab5b-201    | 0.000466869 | 1.24795     | 1.24795     |
| Rab8b    | Rab8b-201    | 0.0110462   | 0.843182    | -1.18598    |
| Rab9b    | Rab9b-001    | 0.0246093   | 1.8615      | 1.8615      |
| Rabac1   | Rabac1-006   | 0.0186525   | 0.39372     | -2.53988    |
| Rabep1   | Rabep1-004   | 0.00133215  | 2.45689     | 2.45689     |
| Rabgap1  | Rabgap1-003  | 0.0221186   | 17.1726     | 17.1726     |
| Rabgap1l | Rabgap1l-003 | 0.00185975  | 0.739995    | -1.35136    |
| Rabgap1l | Rabgap1l-011 | 3.66382e-05 | 18.4724     | 18.4724     |
| Rabggtb  | Rabggtb-011  | 0.0323889   | 0.00215959  | -463.05     |
| Rabggtb  | Rabggtb-002  | 0.0372313   | 1.16897     | 1.16897     |
| Rabggtb  | Rabggtb-003  | 0.0491778   | 3.01667     | 3.01667     |
| Rabif    | Rabif-001    | 0.000190519 | 1.30919     | 1.30919     |
| Rab12    | Rab12-004    | 0.0390485   | 2.41848     | 2.41848     |
| Rab13    | Rab13-001    | 0.00577602  | 1.27593     | 1.27593     |
| Rab16    | Rab16-001    | 0.0213576   | 0.925       | -1.08108    |
| Rab16    | Rab16-004    | 0.00236773  | 4.53197     | 4.53197     |
| Rac1     | Rac1-003     | 0.0139187   | 1.2737      | 1.2737      |
| Racgap1  | Racgap1-002  | 0.0456364   | 0.848755    | -1.1782     |
| Rad17    | Rad17-201    | 0.0243219   | 1.57353     | 1.57353     |
| Rad18    | Rad18-003    | 0.000311622 | 1.33066     | 1.33066     |
| Rad23a   | Rad23a-002   | 0.00571729  | 0.515008    | -1.94172    |
| Rad23b   | Rad23b-001   | 0.0227704   | 1.2445      | 1.2445      |

|           |               |             |             |             |
|-----------|---------------|-------------|-------------|-------------|
| Rad23b    | Rad23b-003    | 0.0279043   | 1.45774     | 1.45774     |
| Rad51ap1  | Rad51ap1-001  | 0.0129283   | 1.41548     | 1.41548     |
| Rad51c    | Rad51c-002    | 0.0217375   | 0.560402    | -1.78443    |
| Rad52     | Rad52-003     | 0.0220564   | 0.598926    | -1.66965    |
| Rad52     | Rad52-014     | 0.00485644  | 0.673939    | -1.48381    |
| Rad54l2   | Rad54l2-001   | 0.000258589 | 0.506635    | -1.97381    |
| Rad9a     | Rad9a-201     | 0.000849944 | 0.64329     | -1.55451    |
| Ralbp1    | Ralbp1-202    | 0.0424431   | 1.44179     | 1.44179     |
| Ralgapa1  | Ralgapa1-202  | 0.00306064  | 0.763183    | -1.3103     |
| Ralgapa2  | Ralgapa2-005  | 0.00994833  | 0.00167716  | -596.246    |
| Ralgapa2  | Ralgapa2-010  | 0.0291451   | 0.0227758   | -43.9063    |
| Ralgapb   | Ralgapb-001   | 0.0389192   | 1.32981     | 1.32981     |
| Ralgapb   | Ralgapb-201   | 0.0141463   | 1.39921     | 1.39921     |
| Ralgapb   | Ralgapb-004   | 0.0365224   | 5.75332     | 5.75332     |
| Ralgds    | Ralgds-004    | 0.0203346   | 0.441705    | -2.26395    |
| Ralgds    | Ralgds-001    | 0.00858913  | 0.646573    | -1.54662    |
| Ralgps2   | Ralgps2-001   | 3.40983e-05 | 0.539523    | -1.85349    |
| Ralgps2   | Ralgps2-008   | 0.0380488   | 1.53684     | 1.53684     |
| Raly      | Raly-003      | 0.0326971   | 0.748116    | -1.33669    |
| Ramp2     | Ramp2-001     | 0.017759    | 0.439768    | -2.27393    |
| Ranbp17   | Ranbp17-002   | 0.00265095  | 1.78587     | 1.78587     |
| Ranbp6    | Ranbp6-001    | 0.017254    | 1.35128     | 1.35128     |
| Rap1a     | Rap1a-001     | 0.0450783   | 0.758716    | -1.31802    |
| Rap1a     | Rap1a-002     | 0.02596     | 1.21574     | 1.21574     |
| Rap1a     | Rap1a-004     | 0.00102357  | 1.42753     | 1.42753     |
| Rap1a-ps2 | Rap1a-ps2-001 | 0.0179777   | 3.89919     | 3.89919     |
| Rap2a     | Rap2a-001     | 0.00746252  | 0.569096    | -1.75717    |
| Rapgef1   | Rapgef1-007   | 0.0258579   | 1.38412     | 1.38412     |
| Rapgef1   | Rapgef1-006   | 0.00421351  | 2.54331     | 2.54331     |
| Rapgef1   | Rapgef1-005   | 0.00305095  | 2.83835     | 2.83835     |
| Rapgef2   | Rapgef2-001   | 0.0470946   | 1.39245     | 1.39245     |
| Rapgef3   | Rapgef3-002   | 0.037638    | 0.217257    | -4.60284    |
| Rapgef5   | Rapgef5-201   | 0.009623    | 1.18116     | 1.18116     |
| Rapgef6   | Rapgef6-008   | 0.0182373   | 0.376366    | -2.65699    |
| Rapgef6   | Rapgef6-003   | 0.00782516  | 4.26541     | 4.26541     |
| Raph1     | Raph1-201     | 0.0408063   | 16.4598     | 16.4598     |
| Raph1     | Raph1-005     | 0.0185703   | 17.9447     | 17.9447     |
| Rapsn     | Rapsn-004     | 0.0312549   | 2.24195e+06 | 2.24195e+06 |
| Rara      | Rara-004      | 0.0030389   | 0.723657    | -1.38187    |
| Rarg      | Rarg-006      | 0.0295184   | 7.31992     | 7.31992     |
| Rasa3     | Rasa3-001     | 0.00169761  | 0.682774    | -1.46461    |
| Rasal2    | Rasal2-002    | 0.00321943  | 2.13892     | 2.13892     |
| Rasgrp2   | Rasgrp2-015   | 0.00246623  | 1.66101e-05 | -60204.4    |



|         |             |             |           |          |
|---------|-------------|-------------|-----------|----------|
| Rasgrp2 | Rasgrp2-004 | 0.0309436   | 0.12809   | -7.80698 |
| Rasgrp2 | Rasgrp2-018 | 0.0379413   | 0.253369  | -3.94681 |
| Rasl11b | Rasl11b-003 | 0.00466543  | 0.0300663 | -33.2599 |
| Rassf1  | Rassf1-004  | 0.00779455  | 1.57521   | 1.57521  |
| Rassf3  | Rassf3-201  | 2.81624e-05 | 0.723263  | -1.38262 |
| Rb1cc1  | Rb1cc1-001  | 0.00609351  | 0.397573  | -2.51526 |
| Rb1cc1  | Rb1cc1-011  | 0.0173378   | 1.35603   | 1.35603  |
| Rbbp4   | Rbbp4-001   | 0.0212945   | 0.807998  | -1.23763 |
| Rbbp5   | Rbbp5-001   | 0.0188482   | 2.30144   | 2.30144  |
| Rbbp5   | Rbbp5-003   | 0.0228164   | 2.43332   | 2.43332  |
| Rbbp9   | Rbbp9-001   | 7.91442e-05 | 1.38367   | 1.38367  |
| Rbck1   | Rbck1-007   | 0.00878557  | 1.27397   | 1.27397  |
| Rbck1   | Rbck1-003   | 0.0230367   | 3.67705   | 3.67705  |
| Rbl2    | Rbl2-001    | 0.031005    | 0.888898  | -1.12499 |
| Rbm12   | Rbm12-001   | 0.0151878   | 0.755418  | -1.32377 |
| Rbm15   | Rbm15-003   | 0.00729957  | 1.34678   | 1.34678  |
| Rbm15   | Rbm15-001   | 0.0331386   | 1.66603   | 1.66603  |
| Rbm18   | Rbm18-001   | 0.00178736  | 1.25261   | 1.25261  |
| Rbm20   | Rbm20-201   | 0.00871893  | 2.90179   | 2.90179  |
| Rbm22   | Rbm22-002   | 0.0442905   | 0.728451  | -1.37278 |
| Rbm25   | Rbm25-002   | 0.00276859  | 0.843814  | -1.1851  |
| Rbm26   | Rbm26-004   | 0.0013411   | 0.815213  | -1.22667 |
| Rbm28   | Rbm28-003   | 0.0280315   | 1.24275   | 1.24275  |
| Rbm28   | Rbm28-002   | 0.0216818   | 1.37439   | 1.37439  |
| Rbm33   | Rbm33-003   | 0.00445553  | 1.63375   | 1.63375  |
| Rbm38   | Rbm38-001   | 0.0445791   | 29.5243   | 29.5243  |
| Rbm39   | Rbm39-025   | 0.0282581   | 2.09576   | 2.09576  |
| Rbm3os  | Rbm3os-001  | 0.0499775   | 1.32593   | 1.32593  |
| Rbm43   | Rbm43-005   | 0.0398374   | 0.271339  | -3.68542 |
| Rbm46   | Rbm46-001   | 0.015871    | 6.08531   | 6.08531  |
| Rbm46   | Rbm46-004   | 0.015871    | 6.08531   | 6.08531  |
| Rbm4b   | Rbm4b-004   | 0.0435635   | 9.02492   | 9.02492  |
| Rbm5    | Rbm5-011    | 0.0340429   | 0.011494  | -87.0022 |
| Rbm7    | Rbm7-201    | 0.0191468   | 1.12948   | 1.12948  |
| Rbm8a   | Rbm8a-001   | 0.042692    | 0.547162  | -1.82761 |
| Rbms1   | Rbms1-001   | 0.00157804  | 0.727095  | -1.37534 |
| Rbms3   | Rbms3-001   | 0.00672402  | 0.601969  | -1.66121 |
| Rbpms   | Rbpms-201   | 0.0315213   | 0.654126  | -1.52876 |
| Rbpms2  | Rbpms2-201  | 0.00737298  | 0.016545  | -60.4413 |
| Rc3h1   | Rc3h1-002   | 0.00902148  | 1.70151   | 1.70151  |
| Rc3h2   | Rc3h2-006   | 0.018622    | 1.83587   | 1.83587  |
| Rcan3   | Rcan3-001   | 0.0471807   | 0.924028  | -1.08222 |
| Rcan3   | Rcan3-003   | 0.0321006   | 168.461   | 168.461  |

|        |            |             |             |             |
|--------|------------|-------------|-------------|-------------|
| Rcbtb1 | Rcbtb1-001 | 0.0161919   | 1.33018     | 1.33018     |
| Rcbtb1 | Rcbtb1-007 | 0.0387462   | 3.50872     | 3.50872     |
| Rcbtb2 | Rcbtb2-202 | 0.0169105   | 0.143685    | -6.95966    |
| Rcbtb2 | Rcbtb2-008 | 0.0194724   | 0.22877     | -4.37121    |
| Rcn1   | Rcn1-002   | 0.0262001   | 0.754703    | -1.32502    |
| Rcn2   | Rcn2-001   | 0.0442004   | 0.929866    | -1.07542    |
| Rcor2  | Rcor2-003  | 0.0071567   | 0.428106    | -2.33587    |
| Rcor3  | Rcor3-007  | 0.0152046   | 1.57217     | 1.57217     |
| Recql4 | Recql4-201 | 0.0489569   | 1.54045     | 1.54045     |
| Recql5 | Recql5-007 | 0.00968784  | 0.118165    | -8.46273    |
| Recql5 | Recql5-003 | 0.0141961   | 0.338024    | -2.95837    |
| Reep6  | Reep6-201  | 0.0100601   | 1.56773     | 1.56773     |
| Relb   | Relb-001   | 0.00365665  | 0.575002    | -1.73912    |
| Relb   | Relb-201   | 0.00365658  | 0.575008    | -1.73911    |
| Rell2  | Rell2-008  | 0.0262347   | 0.410747    | -2.43459    |
| Reln   | Reln-013   | 0.0102828   | 9.33417     | 9.33417     |
| Renbp  | Renbp-001  | 0.0225104   | 0.709153    | -1.41013    |
| Renbp  | Renbp-010  | 0.0286813   | 31.3993     | 31.3993     |
| Rep15  | Rep15-001  | 0.0142815   | 0.360945    | -2.7705     |
| Reps1  | Reps1-005  | 0.0129289   | 1.11364     | 1.11364     |
| Reps1  | Reps1-001  | 0.00187689  | 1.24837     | 1.24837     |
| Reps1  | Reps1-006  | 0.0131404   | 10861.3     | 10861.3     |
| Rere   | Rere-004   | 0.0252193   | 0.290608    | -3.44107    |
| Rere   | Rere-008   | 0.0111614   | 2.42622     | 2.42622     |
| Rest   | Rest-002   | 0.00269198  | 0.611885    | -1.6343     |
| Ret    | Ret-002    | 0.000737876 | 0.665773    | -1.50201    |
| Ret    | Ret-001    | 0.0439749   | 0.758847    | -1.31779    |
| Retsat | Retsat-004 | 0.0262968   | 0.573015    | -1.74515    |
| Rev1   | Rev1-010   | 0.0195658   | 0.357597    | -2.79644    |
| Rexo1  | Rexo1-007  | 0.00577793  | 0.239219    | -4.18027    |
| Rexo4  | Rexo4-008  | 0.00479809  | 2.02054e+11 | 2.02054e+11 |
| Rfc1   | Rfc1-002   | 0.0403211   | 0.517693    | -1.93165    |
| Rfc1   | Rfc1-004   | 0.0369415   | 0.747195    | -1.33834    |
| Rfesd  | Rfesd-203  | 0.000225828 | 1.502       | 1.502       |
| Rfk    | Rfk-001    | 0.00534501  | 1.49062     | 1.49062     |
| Rftn1  | Rftn1-001  | 0.0164427   | 0.485718    | -2.05881    |
| Rfwd2  | Rfwd2-008  | 0.0216186   | 1.35372     | 1.35372     |
| Rfx2   | Rfx2-202   | 0.0445928   | 1.53523     | 1.53523     |
| Rfxap  | Rfxap-002  | 0.000223642 | 2.72487     | 2.72487     |
| Rgl2   | Rgl2-001   | 0.0220505   | 0.761538    | -1.31313    |
| Rgl2   | Rgl2-010   | 0.00299575  | 1.38936     | 1.38936     |
| Rgs10  | Rgs10-001  | 0.0302838   | 0.745113    | -1.34208    |
| Rgs11  | Rgs11-004  | 0.0184073   | 2.77275     | 2.77275     |

|           |               |             |            |          |
|-----------|---------------|-------------|------------|----------|
| Rgs19     | Rgs19-006     | 0.0132821   | 2.87978    | 2.87978  |
| Rgs19     | Rgs19-011     | 0.0233994   | 4.27845    | 4.27845  |
| Rgs3      | Rgs3-017      | 0.0370764   | 3.6113e-06 | -276909  |
| Rgs3      | Rgs3-008      | 0.0199278   | 0.735563   | -1.3595  |
| Rgs3      | Rgs3-001      | 0.0192094   | 2.84773    | 2.84773  |
| Rgs7      | Rgs7-001      | 0.00326613  | 1.54445    | 1.54445  |
| Rgs7      | Rgs7-201      | 0.0223372   | 2.06465    | 2.06465  |
| Rhbdd1    | Rhbdd1-003    | 0.0103923   | 2.43944    | 2.43944  |
| Rhbdd2    | Rhbdd2-003    | 0.0297311   | 1.71518    | 1.71518  |
| Rhbdd2    | Rhbdd2-005    | 0.0461315   | 3.50501    | 3.50501  |
| Rhbdd2    | Rhbdd2-006    | 0.0354833   | 294.894    | 294.894  |
| Rhbdd3    | Rhbdd3-002    | 0.0486067   | 0.603876   | -1.65597 |
| Rhbdf1    | Rhbdf1-008    | 0.019758    | 0.611302   | -1.63585 |
| Rhbdf1    | Rhbdf1-006    | 0.0379283   | 0.695943   | -1.4369  |
| Rhbd12    | Rhbd12-001    | 0.0191134   | 1.88902    | 1.88902  |
| Rhbd12    | Rhbd12-201    | 0.0191134   | 1.88902    | 1.88902  |
| Rhd       | Rhd-001       | 0.00114931  | 1.55674    | 1.55674  |
| Rheb      | Rheb-001      | 0.00466772  | 1.21199    | 1.21199  |
| Rheb      | Rheb-003      | 0.0194512   | 1.39309    | 1.39309  |
| Rhebl1    | Rhebl1-002    | 0.00795132  | 1.47923    | 1.47923  |
| Rhoa      | Rhoa-005      | 0.0182236   | 0.330059   | -3.02976 |
| Rhobtb1   | Rhobtb1-003   | 0.0485942   | 11.988     | 11.988   |
| Rhobtb3   | Rhobtb3-002   | 0.0322746   | 1.9586     | 1.9586   |
| Rhoc      | Rhoc-001      | 0.000161502 | 0.586314   | -1.70557 |
| Rhoc      | Rhoc-002      | 0.0201359   | 0.619461   | -1.61431 |
| Rhoc      | Rhoc-005      | 0.0145101   | 0.718403   | -1.39198 |
| Rhot1     | Rhot1-002     | 0.0495591   | 1.25786    | 1.25786  |
| Rhot1     | Rhot1-001     | 0.0426174   | 1.65495    | 1.65495  |
| Rhot2     | Rhot2-009     | 0.0353846   | 215.447    | 215.447  |
| Rhot2     | Rhot2-006     | 0.0441361   | 569.184    | 569.184  |
| Rhox1     | Rhox1-001     | 0.0291463   | 1.47477    | 1.47477  |
| Rhox2-ps  | Rhox2-ps-001  | 0.0442543   | 1.41274    | 1.41274  |
| Rhox2a    | Rhox2a-001    | 0.000638985 | 1.31854    | 1.31854  |
| Rhox2c    | Rhox2c-001    | 0.0314472   | 1.40088    | 1.40088  |
| Rhox2f    | Rhox2f-001    | 0.00115632  | 1.39042    | 1.39042  |
| Rhox4a    | Rhox4a-001    | 0.0103618   | 2.04503    | 2.04503  |
| Rhox4a2   | Rhox4a2-001   | 0.042552    | 1.43704    | 1.43704  |
| Rhox4b    | Rhox4b-001    | 0.00157419  | 2.57409    | 2.57409  |
| Rhox7-ps2 | Rhox7-ps2-001 | 0.0149953   | 1.46055    | 1.46055  |
| Rhox7a    | Rhox7a-001    | 0.0478017   | 1.30265    | 1.30265  |
| Ribc1     | Ribc1-001     | 0.0309741   | 2.04305    | 2.04305  |
| Ric3      | Ric3-002      | 0.0164284   | 2.0647     | 2.0647   |
| Ric8      | Ric8-003      | 0.0316789   | 1.72312    | 1.72312  |

|          |              |             |          |          |
|----------|--------------|-------------|----------|----------|
| Ric8     | Ric8-006     | 0.0437082   | 4.50971  | 4.50971  |
| Ric8b    | Ric8b-201    | 0.0301767   | 1.25792  | 1.25792  |
| Riiad1   | Riiad1-001   | 0.0495787   | 3.30371  | 3.30371  |
| Rimbp3   | Rimbp3-001   | 0.0226293   | 2.97536  | 2.97536  |
| Rimkla   | Rimkla-001   | 0.00263184  | 1.39595  | 1.39595  |
| Rims2    | Rims2-201    | 0.0453881   | 1.76978  | 1.76978  |
| Rims3    | Rims3-002    | 0.00120348  | 0.631072 | -1.58461 |
| Rint1    | Rint1-007    | 0.0364805   | 2.00141  | 2.00141  |
| Rita1    | Rita1-001    | 0.0146728   | 1.83951  | 1.83951  |
| Rmnd1    | Rmnd1-005    | 0.00437338  | 2.32519  | 2.32519  |
| Rnaseh2a | Rnaseh2a-005 | 0.0274987   | 0.22275  | -4.48933 |
| Rnaseh2a | Rnaseh2a-201 | 0.00424404  | 0.506007 | -1.97626 |
| Rnaseh2b | Rnaseh2b-002 | 0.0252254   | 2.55296  | 2.55296  |
| Rnasek   | Rnasek-001   | 0.0398231   | 0.865471 | -1.15544 |
| Rnaset2b | Rnaset2b-201 | 0.0248939   | 1.25349  | 1.25349  |
| Rnd1     | Rnd1-001     | 0.0015022   | 1.6384   | 1.6384   |
| Rnd2     | Rnd2-001     | 0.0356724   | 0.68271  | -1.46475 |
| Rnf10    | Rnf10-009    | 0.0451241   | 1.30246  | 1.30246  |
| Rnf11    | Rnf11-002    | 0.0024172   | 1.30825  | 1.30825  |
| Rnf112   | Rnf112-003   | 0.00237885  | 3.33869  | 3.33869  |
| Rnf113a1 | Rnf113a1-001 | 0.0158789   | 1.36831  | 1.36831  |
| Rnf114   | Rnf114-002   | 0.0165607   | 2.38087  | 2.38087  |
| Rnf121   | Rnf121-002   | 0.00280701  | 0.402268 | -2.48591 |
| Rnf121   | Rnf121-001   | 0.0263032   | 1.22033  | 1.22033  |
| Rnf123   | Rnf123-014   | 0.0466984   | 0.56909  | -1.75719 |
| Rnf13    | Rnf13-001    | 0.0458051   | 1.25273  | 1.25273  |
| Rnf14    | Rnf14-201    | 0.0390011   | 0.843441 | -1.18562 |
| Rnf141   | Rnf141-001   | 0.00822082  | 0.744053 | -1.34399 |
| Rnf141   | Rnf141-003   | 0.040872    | 2.14986  | 2.14986  |
| Rnf145   | Rnf145-006   | 0.0088423   | 0.785201 | -1.27356 |
| Rnf157   | Rnf157-001   | 0.0292148   | 1.1236   | 1.1236   |
| Rnf165   | Rnf165-007   | 0.009223    | 2.2888   | 2.2888   |
| Rnf165   | Rnf165-005   | 0.00767127  | 3.22205  | 3.22205  |
| Rnf167   | Rnf167-001   | 0.0380645   | 1.33554  | 1.33554  |
| Rnf167   | Rnf167-005   | 0.0428278   | 2.52697  | 2.52697  |
| Rnf169   | Rnf169-001   | 0.00465105  | 0.749596 | -1.33405 |
| Rnf180   | Rnf180-201   | 0.0476152   | 0.29239  | -3.42009 |
| Rnf181   | Rnf181-001   | 0.0122335   | 1.2465   | 1.2465   |
| Rnf181   | Rnf181-004   | 0.024226    | 5.77417  | 5.77417  |
| Rnf183   | Rnf183-001   | 0.0267928   | 0.228448 | -4.37737 |
| Rnf183   | Rnf183-002   | 0.0267928   | 0.228448 | -4.37737 |
| Rnf185   | Rnf185-001   | 0.000264063 | 1.30776  | 1.30776  |
| Rnf186   | Rnf186-001   | 0.000169048 | 1.94688  | 1.94688  |

|                |                    |             |             |          |
|----------------|--------------------|-------------|-------------|----------|
| Rnf19b         | Rnf19b-202         | 0.0209459   | 0.616452    | -1.62219 |
| Rnf19b         | Rnf19b-001         | 0.0275886   | 0.849712    | -1.17687 |
| Rnf2           | Rnf2-001           | 0.0191833   | 1.14218     | 1.14218  |
| Rnf20          | Rnf20-002          | 0.0390925   | 3.47983     | 3.47983  |
| Rnf214         | Rnf214-002         | 0.033638    | 1.45662     | 1.45662  |
| Rnf216         | Rnf216-001         | 0.0262203   | 1.11066     | 1.11066  |
| Rnf217         | Rnf217-001         | 0.0241579   | 0.917358    | -1.09009 |
| Rnf25          | Rnf25-009          | 0.043553    | 401.815     | 401.815  |
| Rnf38          | Rnf38-013          | 0.0449482   | 15.4062     | 15.4062  |
| Rnf40          | Rnf40-001          | 0.0271749   | 0.806357    | -1.24015 |
| Rnf40          | Rnf40-003          | 0.0380447   | 1.53958     | 1.53958  |
| Rnf44          | Rnf44-015          | 0.0201316   | 0.529934    | -1.88703 |
| Rnf44          | Rnf44-201          | 0.0361796   | 0.715148    | -1.39831 |
| Rnf5           | Rnf5-001           | 0.00214135  | 0.824925    | -1.21223 |
| Rnf6           | Rnf6-201           | 0.0127138   | 0.551781    | -1.81231 |
| Rnf6           | Rnf6-001           | 0.0270117   | 1.34693     | 1.34693  |
| Rnf7           | Rnf7-001           | 0.00139562  | 1.37797     | 1.37797  |
| Rnft2          | Rnft2-001          | 0.00772269  | 2.62424     | 2.62424  |
| Rnft2          | Rnft2-006          | 0.00290681  | 3.16501     | 3.16501  |
| Rnmt           | Rnmt-005           | 0.0268612   | 0.216635    | -4.61606 |
| Rnmt           | Rnmt-001           | 0.0197411   | 0.829118    | -1.2061  |
| Rnmt           | Rnmt-002           | 0.0228634   | 1.19195     | 1.19195  |
| Rnmt           | Rnmt-003           | 0.00819575  | 1.79706     | 1.79706  |
| Rnpc3          | Rnpc3-007          | 0.00541589  | 3.02258e-05 | -33084.3 |
| Rnpc3          | Rnpc3-003          | 0.000324409 | 2.80829     | 2.80829  |
| Rnpepl1        | Rnpepl1-005        | 0.0490658   | 1.45217     | 1.45217  |
| Romo1          | Romo1-003          | 0.0170214   | 1.9782      | 1.9782   |
| Rorb           | Rorb-005           | 0.0214572   | 0.783313    | -1.27663 |
| RP23-114E15.14 | RP23-114E15.14-001 | 0.0263708   | 0.00552097  | -181.127 |
| RP23-137A24.6  | RP23-137A24.6-001  | 0.0375217   | 0.344362    | -2.90392 |
| RP23-166E8.2   | RP23-166E8.2-001   | 0.0325446   | 0.293234    | -3.41024 |
| RP23-178C20.2  | RP23-178C20.2-002  | 0.0103125   | 0.102629    | -9.74387 |
| RP23-20L3.2    | RP23-20L3.2-001    | 0.0368672   | 0.680873    | -1.4687  |
| RP23-226O20.10 | RP23-226O20.10-001 | 0.0344025   | 2.72604     | 2.72604  |
| RP23-287N15.3  | RP23-287N15.3-001  | 0.0230239   | 1.45487     | 1.45487  |
| RP23-312I2.7   | RP23-312I2.7-001   | 0.00662692  | 0.0915325   | -10.9251 |
| RP23-324J22.6  | RP23-324J22.6-001  | 0.0378347   | 0.399011    | -2.5062  |
| RP23-331I23.5  | RP23-331I23.5-001  | 0.0274882   | 1.75652     | 1.75652  |
| RP23-334M3.7   | RP23-334M3.7-001   | 0.0149566   | 0.504653    | -1.98156 |
| RP23-335G1.1   | RP23-335G1.1-003   | 0.0449112   | 4.80397     | 4.80397  |
| RP23-335G1.5   | RP23-335G1.5-001   | 0.0376095   | 0.385639    | -2.5931  |
| RP23-337M7.12  | RP23-337M7.12-001  | 0.0180362   | 2.33295     | 2.33295  |
| RP23-338G5.3   | RP23-338G5.3-001   | 0.000611851 | 1.96574     | 1.96574  |

|               |                   |             |           |          |
|---------------|-------------------|-------------|-----------|----------|
| RP23-355N5.6  | RP23-355N5.6-001  | 0.025553    | 0.502677  | -1.98935 |
| RP23-359M3.4  | RP23-359M3.4-001  | 0.0227696   | 0.303217  | -3.29797 |
| RP23-367H8.4  | RP23-367H8.4-002  | 0.0101464   | 0.481161  | -2.07831 |
| RP23-370A2.5  | RP23-370A2.5-001  | 0.0172982   | 0.697242  | -1.43422 |
| RP23-406J21.2 | RP23-406J21.2-001 | 0.013318    | 0.177149  | -5.64496 |
| RP23-42H18.6  | RP23-42H18.6-001  | 0.0185205   | 1.56588   | 1.56588  |
| RP23-434H14.7 | RP23-434H14.7-001 | 0.0127845   | 0.535431  | -1.86765 |
| RP23-441J16.5 | RP23-441J16.5-001 | 0.0211553   | 2.09764   | 2.09764  |
| RP23-49L8.4   | RP23-49L8.4-001   | 0.000477699 | 4.22413   | 4.22413  |
| RP23-4F16.12  | RP23-4F16.12-001  | 0.0415714   | 1.41801   | 1.41801  |
| RP23-60P18.13 | RP23-60P18.13-001 | 0.0112665   | 2.32166   | 2.32166  |
| RP23-74G1.5   | RP23-74G1.5-001   | 0.0137942   | 1.79023   | 1.79023  |
| RP23-74N13.2  | RP23-74N13.2-001  | 0.00921816  | 3.22542   | 3.22542  |
| RP23-84M17.5  | RP23-84M17.5-001  | 0.00348339  | 2.70421   | 2.70421  |
| RP23-8I8.2    | RP23-8I8.2-001    | 0.00746645  | 0.199472  | -5.01325 |
| RP24-108G5.5  | RP24-108G5.5-001  | 0.00394875  | 0.135993  | -7.35334 |
| RP24-144C5.1  | RP24-144C5.1-001  | 0.00419343  | 2.18065   | 2.18065  |
| RP24-171J16.3 | RP24-171J16.3-001 | 0.0108061   | 2.85498   | 2.85498  |
| RP24-201D17.2 | RP24-201D17.2-001 | 0.0366159   | 0.426339  | -2.34555 |
| RP24-204J8.6  | RP24-204J8.6-001  | 0.045356    | 3.3333    | 3.3333   |
| RP24-211G11.3 | RP24-211G11.3-001 | 0.00450173  | 7.06977   | 7.06977  |
| RP24-259P13.2 | RP24-259P13.2-001 | 0.0457847   | 0.465333  | -2.149   |
| RP24-441E15.4 | RP24-441E15.4-001 | 0.00236841  | 4.74108   | 4.74108  |
| RP24-63G4.13  | RP24-63G4.13-001  | 0.0279301   | 1.68598   | 1.68598  |
| Rpa1          | Rpa1-005          | 0.0356902   | 2.41654   | 2.41654  |
| Rpa3          | Rpa3-001          | 0.00698339  | 1.30344   | 1.30344  |
| Rpap1         | Rpap1-009         | 0.0462765   | 0.0203157 | -49.223  |
| Rpap1         | Rpap1-001         | 0.0202662   | 1.8544    | 1.8544   |
| Rpap1         | Rpap1-007         | 0.00771648  | 6.73375   | 6.73375  |
| Rpap2         | Rpap2-001         | 0.00934223  | 1.49046   | 1.49046  |
| Rpap3         | Rpap3-201         | 0.0196519   | 1.45327   | 1.45327  |
| Rpf1          | Rpf1-002          | 2.94342e-06 | 2.318     | 2.318    |
| Rpf2          | Rpf2-006          | 0.00332921  | 1.9292    | 1.9292   |
| Rph3al        | Rph3al-002        | 0.0489708   | 0.46286   | -2.16048 |
| Rpia          | Rpia-001          | 0.00809479  | 1.46524   | 1.46524  |
| Rpl10         | Rpl10-002         | 2.61005e-06 | 1.73203   | 1.73203  |
| Rpl10a        | Rpl10a-003        | 0.0212626   | 1.60712   | 1.60712  |
| Rpl12         | Rpl12-003         | 0.000432138 | 1.59797   | 1.59797  |
| Rpl13         | Rpl13-003         | 0.00601836  | 1.42824   | 1.42824  |
| Rpl18         | Rpl18-002         | 0.0441036   | 1.29296   | 1.29296  |
| Rpl21         | Rpl21-001         | 0.027032    | 1.39903   | 1.39903  |
| Rpl22         | Rpl22-004         | 0.0297742   | 0.544298  | -1.83723 |
| Rpl22         | Rpl22-003         | 0.0165566   | 3.61598   | 3.61598  |

|            |                |             |          |          |
|------------|----------------|-------------|----------|----------|
| Rpl29      | Rpl29-001      | 0.0230882   | 1.35451  | 1.35451  |
| Rpl29      | Rpl29-002      | 5.97919e-05 | 1.674    | 1.674    |
| Rpl3-ps1   | Rpl3-ps1-001   | 0.017359    | 1.61695  | 1.61695  |
| Rpl35      | Rpl35-003      | 0.00850831  | 1.15055  | 1.15055  |
| Rpl35a     | Rpl35a-003     | 0.043287    | 0.727827 | -1.37395 |
| Rpl35a     | Rpl35a-004     | 0.0318463   | 1.49161  | 1.49161  |
| Rpl35a     | Rpl35a-002     | 0.0457712   | 2.31552  | 2.31552  |
| Rpl36a     | Rpl36a-003     | 0.00396714  | 1.46147  | 1.46147  |
| Rpl41      | Rpl41-002      | 0.0186053   | 1.36605  | 1.36605  |
| Rpl41      | Rpl41-007      | 0.0187436   | 1.47028  | 1.47028  |
| Rpl6       | Rpl6-004       | 0.028146    | 1.82129  | 1.82129  |
| Rpl9       | Rpl9-003       | 0.0198394   | 0.278523 | -3.59037 |
| Rpl9       | Rpl9-007       | 0.0466811   | 1.30809  | 1.30809  |
| Rpl9       | Rpl9-010       | 0.0133249   | 1.71763  | 1.71763  |
| Rpp14      | Rpp14-001      | 0.0287717   | 1.47055  | 1.47055  |
| Rpp21      | Rpp21-005      | 0.0471206   | 1.83808  | 1.83808  |
| Rpp30      | Rpp30-201      | 0.0454226   | 1.33362  | 1.33362  |
| Rpp38      | Rpp38-001      | 0.0443626   | 1.50404  | 1.50404  |
| Rprd1a     | Rprd1a-201     | 0.0280876   | 1.22119  | 1.22119  |
| Rprd1b     | Rprd1b-006     | 0.0339702   | 15.7994  | 15.7994  |
| Rprml      | Rprml-001      | 0.00935741  | 0.704336 | -1.41978 |
| Rps12-ps26 | Rps12-ps26-001 | 0.0486558   | 2.39425  | 2.39425  |
| Rps14      | Rps14-005      | 0.0287149   | 1.26707  | 1.26707  |
| Rps16      | Rps16-003      | 0.046733    | 1.65995  | 1.65995  |
| Rps2       | Rps2-001       | 0.000212126 | 1.65637  | 1.65637  |
| Rps27      | Rps27-009      | 0.0246849   | 4.9379   | 4.9379   |
| Rps28      | Rps28-003      | 0.00466818  | 2.98649  | 2.98649  |
| Rps4x      | Rps4x-003      | 0.0192103   | 5.14778  | 5.14778  |
| Rps5       | Rps5-002       | 0.000742329 | 2.2239   | 2.2239   |
| Rps6ka2    | Rps6ka2-201    | 0.00685947  | 0.81224  | -1.23116 |
| Rps6ka3    | Rps6ka3-002    | 0.0138844   | 2.86868  | 2.86868  |
| Rps6ka4    | Rps6ka4-202    | 0.000919594 | 0.730558 | -1.36882 |
| Rps6kb1    | Rps6kb1-001    | 0.0017191   | 0.645362 | -1.54952 |
| Rps6kb1    | Rps6kb1-004    | 0.0460835   | 1.4305   | 1.4305   |
| Rps6kb1    | Rps6kb1-003    | 0.00358561  | 33.76    | 33.76    |
| Rps9       | Rps9-008       | 0.0104684   | 2.07491  | 2.07491  |
| Rragb      | Rragb-001      | 0.0105644   | 1.2526   | 1.2526   |
| Rragd      | Rragd-001      | 0.00385984  | 1.18969  | 1.18969  |
| Rras2      | Rras2-201      | 3.76555e-05 | 0.67565  | -1.48006 |
| Rrm2       | Rrm2-002       | 0.0465107   | 0.443065 | -2.257   |
| Rrm2b      | Rrm2b-001      | 0.00116931  | 0.617678 | -1.61897 |
| Rsad1      | Rsad1-002      | 0.0429565   | 1.42226  | 1.42226  |
| Rsb1       | Rsb1-001       | 0.0479731   | 0.792407 | -1.26198 |

|         |             |             |          |          |
|---------|-------------|-------------|----------|----------|
| Rsb1    | Rsb1-003    | 0.0392876   | 2.08164  | 2.08164  |
| Rsf1    | Rsf1-007    | 0.0227413   | 0.451689 | -2.21391 |
| Rsf1    | Rsf1-001    | 0.0323457   | 0.5415   | -1.84672 |
| Rsl24d1 | Rsl24d1-001 | 0.0453822   | 0.831009 | -1.20336 |
| Rsph1   | Rsph1-201   | 1.45918e-05 | 0.641588 | -1.55863 |
| Rsrc1   | Rsrc1-007   | 0.0107875   | 0.308578 | -3.24067 |
| Rsrc1   | Rsrc1-002   | 0.048482    | 0.681782 | -1.46674 |
| Rsrc1   | Rsrc1-003   | 0.000990945 | 2.80306  | 2.80306  |
| Rsrc2   | Rsrc2-018   | 0.00787974  | 2.58188  | 2.58188  |
| Rsu1    | Rsu1-004    | 0.00149553  | 3.33889  | 3.33889  |
| Rtca    | Rtca-005    | 0.00960668  | 0.274117 | -3.64808 |
| Rtca    | Rtca-001    | 0.0116106   | 0.78536  | -1.2733  |
| Rtel1   | Rtel1-015   | 0.0187783   | 1.35161  | 1.35161  |
| Rtel1   | Rtel1-014   | 0.00709836  | 1.97646  | 1.97646  |
| Rtkn2   | Rtkn2-002   | 0.0277216   | 1.2485   | 1.2485   |
| Rtn3    | Rtn3-201    | 0.00673706  | 0.786756 | -1.27104 |
| Rtn3    | Rtn3-203    | 0.0211406   | 1.27146  | 1.27146  |
| Rtn4ip1 | Rtn4ip1-001 | 0.0026239   | 1.35765  | 1.35765  |
| Rufy2   | Rufy2-001   | 0.00802156  | 1.15727  | 1.15727  |
| Rufy2   | Rufy2-006   | 0.0454601   | 32.2795  | 32.2795  |
| Rufy3   | Rufy3-004   | 0.0104564   | 1.77441  | 1.77441  |
| Rufy3   | Rufy3-005   | 0.0101891   | 2.02981  | 2.02981  |
| Rundc3b | Rundc3b-002 | 0.00984703  | 1.76882  | 1.76882  |
| Runx3   | Runx3-001   | 0.0064593   | 0.667482 | -1.49817 |
| Rusc1   | Rusc1-002   | 0.0159093   | 0.773165 | -1.29338 |
| Ruvbl2  | Ruvbl2-002  | 0.00132752  | 1.28357  | 1.28357  |
| Rwdd1   | Rwdd1-001   | 0.0418724   | 1.08797  | 1.08797  |
| Rwdd2a  | Rwdd2a-003  | 0.0266263   | 1.83935  | 1.83935  |
| Rwdd3   | Rwdd3-002   | 0.0154266   | 2.22529  | 2.22529  |
| Rwdd4a  | Rwdd4a-002  | 0.00550051  | 2.40147  | 2.40147  |
| Rxrb    | Rxrb-009    | 0.0188983   | 2.60217  | 2.60217  |
| Rybp    | Rybp-001    | 0.000121887 | 0.560669 | -1.78358 |
| Rybp    | Rybp-003    | 0.00885702  | 2.91623  | 2.91623  |
| Ryk     | Ryk-002     | 0.0318694   | 0.281646 | -3.55055 |
| S100a10 | S100a10-002 | 0.0362255   | 0.546696 | -1.82917 |
| S100a10 | S100a10-001 | 0.018801    | 0.587845 | -1.70113 |
| S100a13 | S100a13-001 | 0.0341786   | 0.663792 | -1.5065  |
| S100a14 | S100a14-003 | 0.0332266   | 18.5009  | 18.5009  |
| S100a4  | S100a4-001  | 0.00061524  | 0.39241  | -2.54836 |
| S100a6  | S100a6-003  | 0.035336    | 0.505158 | -1.97958 |
| S100a6  | S100a6-002  | 0.0125281   | 0.523503 | -1.91021 |
| S100pbp | S100pbp-010 | 0.00601144  | 0.60534  | -1.65196 |
| Saal1   | Saal1-003   | 0.00461879  | 1.53165  | 1.53165  |



|        |            |             |          |          |
|--------|------------|-------------|----------|----------|
| Safb   | Safb-006   | 0.0413695   | 1.39471  | 1.39471  |
| Safb   | Safb-002   | 0.0200281   | 1.78744  | 1.78744  |
| Safb2  | Safb2-009  | 0.0313275   | 3.69052  | 3.69052  |
| Samd10 | Samd10-001 | 0.0213351   | 1.84189  | 1.84189  |
| Samd15 | Samd15-002 | 0.0492224   | 0.226507 | -4.41488 |
| Samhd1 | Samhd1-201 | 0.00302979  | 5.04192  | 5.04192  |
| Sapcd2 | Sapcd2-001 | 0.0435201   | 0.188951 | -5.29237 |
| Sar1a  | Sar1a-201  | 0.00548879  | 0.743425 | -1.34513 |
| Sarm1  | Sarm1-005  | 0.033254    | 0.34941  | -2.86197 |
| Sars   | Sars-002   | 0.00615145  | 1.43215  | 1.43215  |
| Sars   | Sars-001   | 9.28027e-05 | 1.43652  | 1.43652  |
| Sars   | Sars-003   | 0.0200875   | 1.61302  | 1.61302  |
| Sart1  | Sart1-201  | 0.0448269   | 1.14477  | 1.14477  |
| Satb1  | Satb1-201  | 0.0466807   | 0.383771 | -2.60572 |
| Sbf1   | Sbf1-003   | 0.0436332   | 0.811932 | -1.23163 |
| Sbf1   | Sbf1-007   | 0.0319033   | 1.37188  | 1.37188  |
| Sbsn   | Sbsn-001   | 0.0213082   | 2.43254  | 2.43254  |
| Sbsn   | Sbsn-006   | 0.0435554   | 14.5979  | 14.5979  |
| Sc5d   | Sc5d-202   | 0.0148184   | 1.37874  | 1.37874  |
| Scaf1  | Scaf1-003  | 0.000641587 | 0.755955 | -1.32283 |
| Scaf11 | Scaf11-201 | 0.00850266  | 1.10671  | 1.10671  |
| Scaf4  | Scaf4-201  | 0.00273251  | 1.45646  | 1.45646  |
| Scaf8  | Scaf8-201  | 0.0349448   | 1.16585  | 1.16585  |
| Scai   | Scai-001   | 0.00300292  | 1.30416  | 1.30416  |
| Scai   | Scai-010   | 0.0215042   | 2.01781  | 2.01781  |
| Scamp1 | Scamp1-001 | 0.000193764 | 0.615679 | -1.62422 |
| Scamp4 | Scamp4-201 | 0.00166383  | 0.65745  | -1.52103 |
| Scap   | Scap-001   | 0.0196738   | 0.881531 | -1.13439 |
| Scap   | Scap-002   | 0.0364021   | 3.23632  | 3.23632  |
| Scarb1 | Scarb1-001 | 0.012103    | 0.753937 | -1.32637 |
| Scarb2 | Scarb2-001 | 0.00309614  | 0.850074 | -1.17637 |
| Scel   | Scel-201   | 0.0108714   | 4.7254   | 4.7254   |
| Scfd2  | Scfd2-003  | 0.00667562  | 25.1166  | 25.1166  |
| Scg2   | Scg2-002   | 0.00102199  | 0.579428 | -1.72584 |
| Scg3   | Scg3-201   | 0.000187289 | 0.831084 | -1.20325 |
| Schip1 | Schip1-004 | 0.0379689   | 0.116207 | -8.60532 |
| Schip1 | Schip1-002 | 0.0497991   | 0.125422 | -7.97308 |
| Schip1 | Schip1-009 | 0.031139    | 0.55424  | -1.80427 |
| Scml2  | Scml2-003  | 0.0234345   | 1.84225  | 1.84225  |
| Scml4  | Scml4-003  | 0.00348374  | 0.41926  | -2.38515 |
| Scml4  | Scml4-005  | 0.0448817   | 2.23477  | 2.23477  |
| Scn1a  | Scn1a-004  | 0.00496297  | 2.70925  | 2.70925  |
| Scn1a  | Scn1a-002  | 0.00363525  | 12.0643  | 12.0643  |

|         |             |             |          |          |
|---------|-------------|-------------|----------|----------|
| Scn1b   | Scn1b-201   | 0.012071    | 0.66453  | -1.50482 |
| Scn2a1  | Scn2a1-201  | 0.000339043 | 1.88975  | 1.88975  |
| Scn2a1  | Scn2a1-001  | 0.0106331   | 1.9549   | 1.9549   |
| Scn3b   | Scn3b-002   | 0.0326396   | 1.52015  | 1.52015  |
| Scn8a   | Scn8a-202   | 0.0244358   | 0.709138 | -1.41016 |
| Scn8a   | Scn8a-001   | 0.0325561   | 0.768543 | -1.30116 |
| Scn8a   | Scn8a-012   | 0.00591316  | 6.15567  | 6.15567  |
| Scnm1   | Scnm1-001   | 0.0122988   | 1.58728  | 1.58728  |
| Scoc    | Scoc-202    | 0.0162346   | 1.40438  | 1.40438  |
| Scp2    | Scp2-001    | 0.00571889  | 1.44581  | 1.44581  |
| Scpep1  | Scpep1-001  | 0.021005    | 1.3415   | 1.3415   |
| Scrib   | Scrib-001   | 0.00211648  | 0.748787 | -1.33549 |
| Scrn1   | Scrn1-005   | 0.00362645  | 1.59601  | 1.59601  |
| Scrn3   | Scrn3-001   | 0.00207014  | 1.87383  | 1.87383  |
| Sct     | Sct-201     | 0.00431136  | 0.337435 | -2.96354 |
| Sctr    | Sctr-002    | 0.0164085   | 2.61324  | 2.61324  |
| Scube3  | Scube3-001  | 0.0013586   | 1.51359  | 1.51359  |
| Scube3  | Scube3-004  | 0.0248724   | 1.61897  | 1.61897  |
| Scyl2   | Scyl2-002   | 0.0317849   | 1.22148  | 1.22148  |
| Sdad1   | Sdad1-002   | 0.0491201   | 1.79119  | 1.79119  |
| Sdc3    | Sdc3-001    | 0.000455362 | 0.684675 | -1.46055 |
| Sdccag3 | Sdccag3-011 | 0.0305176   | 2.25469  | 2.25469  |
| Sdccag8 | Sdccag8-006 | 0.000179772 | 0.283189 | -3.53121 |
| Sde2    | Sde2-001    | 0.0450121   | 1.21279  | 1.21279  |
| Sdf4    | Sdf4-001    | 0.000322476 | 0.6703   | -1.49187 |
| Sdf4    | Sdf4-002    | 0.000615214 | 1.33277  | 1.33277  |
| Sdhaf3  | Sdhaf3-001  | 0.0153568   | 1.24959  | 1.24959  |
| Sdhc    | Sdhc-001    | 0.0130036   | 1.15456  | 1.15456  |
| Sdhc    | Sdhc-002    | 0.0199642   | 1.24526  | 1.24526  |
| Sdpr    | Sdpr-001    | 0.00668044  | 0.812803 | -1.23031 |
| Sdr42e1 | Sdr42e1-001 | 0.0140506   | 0.191128 | -5.2321  |
| Sdr42e1 | Sdr42e1-003 | 0.0140506   | 0.191128 | -5.2321  |
| Sdsl    | Sdsl-002    | 0.00695018  | 0.352686 | -2.83538 |
| Sdsl    | Sdsl-001    | 0.00118925  | 0.605512 | -1.65149 |
| Sec11a  | Sec11a-002  | 0.00916691  | 1.56866  | 1.56866  |
| Sec11c  | Sec11c-003  | 0.00135796  | 0.452926 | -2.20787 |
| Sec11c  | Sec11c-001  | 7.4004e-05  | 0.587335 | -1.70261 |
| Sec16b  | Sec16b-002  | 0.0200582   | 1.6776   | 1.6776   |
| Sec22b  | Sec22b-002  | 0.000921241 | 1.69155  | 1.69155  |
| Sec22c  | Sec22c-001  | 0.0349539   | 2.6116   | 2.6116   |
| Sec23a  | Sec23a-004  | 0.0124252   | 1.56894  | 1.56894  |
| Sec23b  | Sec23b-001  | 0.0183655   | 1.38688  | 1.38688  |
| Sec23ip | Sec23ip-001 | 0.0492583   | 1.28767  | 1.28767  |

|         |             |             |            |          |
|---------|-------------|-------------|------------|----------|
| Sec24a  | Sec24a-006  | 0.0167127   | 1.52686    | 1.52686  |
| Sec24a  | Sec24a-003  | 0.000199373 | 3.12129    | 3.12129  |
| Sec24b  | Sec24b-001  | 0.0268468   | 1.13733    | 1.13733  |
| Sec24c  | Sec24c-201  | 3.59763e-05 | 1.22051    | 1.22051  |
| Sec24d  | Sec24d-001  | 0.0165745   | 1.291      | 1.291    |
| Sec31a  | Sec31a-001  | 0.0381003   | 1.27125    | 1.27125  |
| Sec31a  | Sec31a-012  | 0.0179614   | 2.38642    | 2.38642  |
| Sec61a2 | Sec61a2-005 | 0.0473396   | 0.420015   | -2.38087 |
| Sec61g  | Sec61g-005  | 0.024235    | 1.61525    | 1.61525  |
| Sec63   | Sec63-001   | 0.00326137  | 0.753763   | -1.32668 |
| Sec63   | Sec63-004   | 0.0156335   | 1.20955    | 1.20955  |
| Sec63   | Sec63-002   | 0.00652008  | 4.82649    | 4.82649  |
| Sectm1a | Sectm1a-001 | 0.0214785   | 1.56611    | 1.56611  |
| Sel1l   | Sel1l-006   | 0.0466711   | 1.32461    | 1.32461  |
| Sel1l   | Sel1l-001   | 0.000667687 | 1.72448    | 1.72448  |
| Sel1l   | Sel1l-004   | 0.0141667   | 2.45742    | 2.45742  |
| Selo    | Selo-001    | 0.0191657   | 1.3968     | 1.3968   |
| Sema3f  | Sema3f-001  | 0.0238669   | 0.5013     | -1.99481 |
| Sema3g  | Sema3g-001  | 0.000103648 | 2.74589    | 2.74589  |
| Sema4b  | Sema4b-004  | 0.0271286   | 0.820579   | -1.21865 |
| Sema4c  | Sema4c-005  | 0.0289582   | 0.0388706  | -25.7264 |
| Sema4c  | Sema4c-002  | 0.00857461  | 0.677284   | -1.47648 |
| Sema4d  | Sema4d-006  | 0.006946    | 0.00727898 | -137.382 |
| Sema5b  | Sema5b-001  | 0.0499782   | 0.34462    | -2.90175 |
| Sema6b  | Sema6b-201  | 0.0113978   | 0.305113   | -3.27748 |
| Sema6c  | Sema6c-201  | 0.0146904   | 0.00789755 | -126.622 |
| Sema6d  | Sema6d-008  | 0.000718166 | 0.311887   | -3.20629 |
| Sema6d  | Sema6d-201  | 0.00300455  | 0.343112   | -2.9145  |
| Senp1   | Senp1-007   | 0.0200635   | 0.00749534 | -133.416 |
| Senp1   | Senp1-001   | 0.0371172   | 0.691815   | -1.44547 |
| Senp5   | Senp5-004   | 0.0107634   | 14.1788    | 14.1788  |
| Senp6   | Senp6-013   | 0.0241869   | 0.0648657  | -15.4165 |
| Senp6   | Senp6-006   | 0.00975194  | 1.36066    | 1.36066  |
| Senp7   | Senp7-010   | 0.0203397   | 0.406744   | -2.45855 |
| Senp7   | Senp7-004   | 0.0181262   | 0.489783   | -2.04172 |
| Sephs1  | Sephs1-001  | 0.0452225   | 0.572633   | -1.74632 |
| Sepn1   | Sepn1-001   | 0.0265347   | 0.761232   | -1.31366 |
| Sepsecs | Sepsecs-001 | 0.00161769  | 0.595715   | -1.67866 |
| 06-Sep  | Sept6-003   | 0.0316827   | 0.553148   | -1.80783 |
| 09-Sep  | Sept9-002   | 0.0213299   | 0.673428   | -1.48494 |
| 10-Sep  | Sept10-201  | 0.00176807  | 0.646084   | -1.54779 |
| Serac1  | Serac1-001  | 0.0396487   | 1.2552     | 1.2552   |
| Serbp1  | Serbp1-004  | 0.0264568   | 1.22603    | 1.22603  |

|           |               |             |             |              |
|-----------|---------------|-------------|-------------|--------------|
| Serbp1    | Serbp1-011    | 0.0113745   | 1.23566     | 1.23566      |
| Serinc2   | Serinc2-005   | 0.0132758   | 2.88558     | 2.88558      |
| Serinc5   | Serinc5-201   | 0.0255679   | 0.783329    | -1.2766      |
| Serpinb6b | Serpinb6b-002 | 0.0359269   | 0.000753321 | -1327.46     |
| Serpinb6b | Serpinb6b-001 | 0.0359269   | 0.000753321 | -1327.45     |
| Serpinc1  | Serpinc1-001  | 0.0336029   | 0.315151    | -3.17308     |
| Serpinf1  | Serpinf1-004  | 0.0379067   | 2.50466e-08 | -3.99257e+07 |
| Serpinf1  | Serpinf1-002  | 0.0374244   | 0.115894    | -8.6286      |
| Serpinf1  | Serpinf1-007  | 0.000859417 | 0.428707    | -2.33259     |
| Serpinf1  | Serpinf1-008  | 0.0117968   | 0.448431    | -2.23        |
| Serpinh1  | Serpinh1-201  | 0.00162005  | 2.44397     | 2.44397      |
| Sesn2     | Sesn2-001     | 0.00935682  | 1.66222     | 1.66222      |
| Set       | Set-005       | 1.51831e-05 | 1.75439     | 1.75439      |
| Setd3     | Setd3-004     | 0.0108146   | 0.57569     | -1.73704     |
| Setd3     | Setd3-001     | 9.84673e-05 | 0.842223    | -1.18733     |
| Setd4     | Setd4-003     | 0.0283808   | 1.52008     | 1.52008      |
| Setd4     | Setd4-201     | 0.00580823  | 2.11916     | 2.11916      |
| Sez6      | Sez6-001      | 0.00225003  | 0.479861    | -2.08394     |
| Sez6      | Sez6-004      | 0.0442879   | 4.84194     | 4.84194      |
| Sez6l2    | Sez6l2-003    | 0.00207199  | 0.584398    | -1.71116     |
| Sez6l2    | Sez6l2-002    | 0.00639063  | 0.610858    | -1.63704     |
| Sez6l2    | Sez6l2-001    | 0.00555387  | 0.734645    | -1.3612      |
| Sf1       | Sf1-001       | 0.00416933  | 1.36867     | 1.36867      |
| Sfi1      | Sfi1-011      | 0.0256776   | 1.25558     | 1.25558      |
| Sft2d1    | Sft2d1-009    | 0.0290247   | 3.76451     | 3.76451      |
| Sft2d2    | Sft2d2-001    | 0.0046639   | 0.756067    | -1.32263     |
| Sft2d2    | Sft2d2-004    | 0.00296254  | 6.03594     | 6.03594      |
| Sfxn3     | Sfxn3-202     | 0.0277947   | 0.354866    | -2.81797     |
| Sfxn5     | Sfxn5-009     | 0.00684312  | 4.06776     | 4.06776      |
| Sgcb      | Sgcb-001      | 0.0184669   | 1.34449     | 1.34449      |
| Sgce      | Sgce-007      | 0.0161154   | 1.7709      | 1.7709       |
| Sgip1     | Sgip1-007     | 0.0303372   | 0.490444    | -2.03897     |
| Sgk3      | Sgk3-010      | 0.0365916   | 4.14618e-07 | -2.41186e+06 |
| Sgms1     | Sgms1-004     | 0.027207    | 0.560003    | -1.7857      |
| Sgms1     | Sgms1-003     | 0.0289972   | 6.14101     | 6.14101      |
| Sgol1     | Sgol1-003     | 0.0331204   | 2.5121e-05  | -39807.3     |
| Sgpl1     | Sgpl1-002     | 0.00228642  | 0.625474    | -1.59879     |
| Sgpl1     | Sgpl1-001     | 0.023289    | 0.696595    | -1.43555     |
| Sgsm1     | Sgsm1-002     | 0.038114    | 9.73124     | 9.73124      |
| Sgsm3     | Sgsm3-001     | 0.0205564   | 1.34759     | 1.34759      |
| Sgta      | Sgta-201      | 0.0479374   | 1.20519     | 1.20519      |
| Sh2b1     | Sh2b1-007     | 0.043077    | 1.95174     | 1.95174      |
| Sh2b1     | Sh2b1-006     | 0.0450403   | 2.66035     | 2.66035      |

|          |              |             |           |          |
|----------|--------------|-------------|-----------|----------|
| Sh3bgrl  | Sh3bgrl-001  | 0.00633512  | 0.862105  | -1.15995 |
| Sh3bgrl3 | Sh3bgrl3-001 | 0.0164902   | 0.859427  | -1.16357 |
| Sh3bp1   | Sh3bp1-201   | 0.000719516 | 1.27079   | 1.27079  |
| Sh3bp2   | Sh3bp2-006   | 0.00315922  | 0.462103  | -2.16402 |
| Sh3bp5   | Sh3bp5-002   | 0.0190029   | 7.61462   | 7.61462  |
| Sh3gl3   | Sh3gl3-001   | 0.0265771   | 0.558545  | -1.79037 |
| Sh3glb1  | Sh3glb1-003  | 2.88515e-05 | 0.433798  | -2.30522 |
| Sh3kbp1  | Sh3kbp1-007  | 0.0185863   | 0.414782  | -2.4109  |
| Sh3kbp1  | Sh3kbp1-004  | 0.0387378   | 0.663892  | -1.50627 |
| Sh3kbp1  | Sh3kbp1-002  | 0.00972372  | 0.743633  | -1.34475 |
| Sh3kbp1  | Sh3kbp1-001  | 0.030827    | 0.754581  | -1.32524 |
| Sh3pxd2a | Sh3pxd2a-202 | 0.00816011  | 0.530331  | -1.88562 |
| Sh3pxd2a | Sh3pxd2a-201 | 0.00837741  | 0.691131  | -1.4469  |
| Sh3tc1   | Sh3tc1-001   | 0.0330294   | 0.0014338 | -697.449 |
| Sh3tc1   | Sh3tc1-004   | 0.0141971   | 0.153697  | -6.5063  |
| Shc1     | Shc1-004     | 0.0145725   | 0.697497  | -1.4337  |
| Shc3     | Shc3-201     | 0.0446113   | 0.632252  | -1.58165 |
| Shcbp1l  | Shcbp1l-001  | 0.0298009   | 1.58591   | 1.58591  |
| She      | She-001      | 0.0375017   | 0.532087  | -1.87939 |
| Shf      | Shf-007      | 0.0293529   | 0.271926  | -3.67747 |
| Shfm1    | Shfm1-001    | 0.0038438   | 1.08136   | 1.08136  |
| Shisa2   | Shisa2-201   | 0.00801586  | 1.69882   | 1.69882  |
| Shisa4   | Shisa4-001   | 0.0430584   | 0.615783  | -1.62395 |
| Shisa7   | Shisa7-001   | 0.0279441   | 0.583378  | -1.71415 |
| Shisa8   | Shisa8-201   | 0.0112901   | 0.255186  | -3.91872 |
| Shkbp1   | Shkbp1-003   | 0.0455463   | 0.541282  | -1.84746 |
| Shkbp1   | Shkbp1-001   | 0.00156433  | 0.546157  | -1.83098 |
| Shmt2    | Shmt2-201    | 0.0152057   | 1.16607   | 1.16607  |
| Shoc2    | Shoc2-201    | 0.0165024   | 0.847609  | -1.17979 |
| Shpk     | Shpk-002     | 0.0178325   | 2.14699   | 2.14699  |
| Shprh    | Shprh-002    | 0.0456627   | 1.95235   | 1.95235  |
| Shprh    | Shprh-007    | 0.0165838   | 5.29479   | 5.29479  |
| Shtn1    | Shtn1-201    | 0.00117608  | 0.774807  | -1.29064 |
| Siah1a   | Siah1a-201   | 0.00309371  | 1.231     | 1.231    |
| Sidt2    | Sidt2-002    | 0.0302599   | 0.705797  | -1.41684 |
| Sik1     | Sik1-201     | 0.0259448   | 0.799302  | -1.25109 |
| Sik2     | Sik2-003     | 0.0260282   | 0.540129  | -1.85141 |
| Sik3     | Sik3-002     | 0.00117096  | 1.91067   | 1.91067  |
| Sin3b    | Sin3b-202    | 0.00818318  | 1.29608   | 1.29608  |
| Sipa1    | Sipa1-203    | 0.0272011   | 0.660088  | -1.51495 |
| Sipa1l2  | Sipa1l2-201  | 0.0359557   | 0.850853  | -1.17529 |
| Sipa1l3  | Sipa1l3-002  | 0.0451835   | 0.873293  | -1.14509 |
| Sipa1l3  | Sipa1l3-201  | 0.0451835   | 0.873293  | -1.14509 |

|          |              |             |           |          |
|----------|--------------|-------------|-----------|----------|
| Sirt1    | Sirt1-002    | 0.0299674   | 0.573913  | -1.74243 |
| Sirt1    | Sirt1-001    | 0.0124337   | 2.41148   | 2.41148  |
| Sirt1    | Sirt1-201    | 0.0124345   | 2.41156   | 2.41156  |
| Sirt2    | Sirt2-006    | 0.0189891   | 8.89667   | 8.89667  |
| Sirt3    | Sirt3-002    | 0.00392127  | 1.60014   | 1.60014  |
| Sirt4    | Sirt4-003    | 0.0346172   | 2.17656   | 2.17656  |
| Sirt6    | Sirt6-002    | 0.0396001   | 1.55005   | 1.55005  |
| Sirt7    | Sirt7-008    | 0.033861    | 0.301199  | -3.32007 |
| Sirt7    | Sirt7-006    | 0.00147165  | 0.529118  | -1.88994 |
| Six3os1  | Six3os1-002  | 0.0202115   | 1.73279   | 1.73279  |
| Six4     | Six4-001     | 0.00673152  | 0.89721   | -1.11457 |
| Six5     | Six5-001     | 0.0156847   | 0.769597  | -1.29938 |
| Ska2     | Ska2-002     | 0.0103553   | 1.78618   | 1.78618  |
| Ska3     | Ska3-201     | 0.0311212   | 1.14184   | 1.14184  |
| Skil     | Skil-002     | 0.00406015  | 2.7499    | 2.7499   |
| Skiv2l   | Skiv2l-002   | 0.0035973   | 0.460374  | -2.17215 |
| Skiv2l   | Skiv2l-001   | 0.0106478   | 0.633557  | -1.57839 |
| Skiv2l   | Skiv2l-004   | 0.0127827   | 1.56621   | 1.56621  |
| Skp1a    | Skp1a-003    | 0.0109805   | 0.135441  | -7.38327 |
| Slamf8   | Slamf8-001   | 0.0230493   | 18.5196   | 18.5196  |
| Slbp     | Slbp-003     | 0.024502    | 7.82466   | 7.82466  |
| Slc10a4  | Slc10a4-002  | 0.0378124   | 1.64387   | 1.64387  |
| Slc10a4  | Slc10a4-001  | 0.0064725   | 1.67095   | 1.67095  |
| Slc11a1  | Slc11a1-010  | 0.0238847   | 0.0384643 | -25.9981 |
| Slc12a5  | Slc12a5-004  | 0.00147622  | 0.415803  | -2.40499 |
| Slc12a5  | Slc12a5-001  | 0.0164446   | 0.621661  | -1.60859 |
| Slc12a6  | Slc12a6-006  | 0.0364035   | 0.665714  | -1.50215 |
| Slc12a6  | Slc12a6-001  | 0.00598367  | 0.757686  | -1.31981 |
| Slc12a7  | Slc12a7-201  | 0.000104111 | 0.650327  | -1.53769 |
| Slc12a8  | Slc12a8-004  | 0.0433362   | 27.4704   | 27.4704  |
| Slc12a9  | Slc12a9-001  | 0.00314437  | 0.800731  | -1.24886 |
| Slc15a4  | Slc15a4-005  | 0.040109    | 0.0147966 | -67.583  |
| Slc15a5  | Slc15a5-004  | 0.00240363  | 2.9071    | 2.9071   |
| Slc16a14 | Slc16a14-001 | 0.00219413  | 2.09844   | 2.09844  |
| Slc16a14 | Slc16a14-002 | 0.0204205   | 186.467   | 186.467  |
| Slc16a3  | Slc16a3-201  | 0.0317316   | 1.30361   | 1.30361  |
| Slc16a4  | Slc16a4-001  | 0.0219353   | 0.647454  | -1.54451 |
| Slc16a5  | Slc16a5-005  | 0.0318848   | 2.47498   | 2.47498  |
| Slc16a6  | Slc16a6-001  | 0.00200519  | 0.608352  | -1.64379 |
| Slc16a6  | Slc16a6-004  | 0.0271735   | 1.7693    | 1.7693   |
| Slc17a9  | Slc17a9-002  | 0.0226797   | 1.96448   | 1.96448  |
| Slc17a9  | Slc17a9-001  | 0.0339603   | 2.31764   | 2.31764  |
| Slc1a4   | Slc1a4-201   | 0.00646698  | 1.61723   | 1.61723  |

|          |              |             |             |          |
|----------|--------------|-------------|-------------|----------|
| Slc1a7   | Slc1a7-001   | 0.00984854  | 3.38257     | 3.38257  |
| Slc22a18 | Slc22a18-001 | 0.00581294  | 0.187675    | -5.32835 |
| Slc22a7  | Slc22a7-201  | 0.0127146   | 1.73968     | 1.73968  |
| Slc24a2  | Slc24a2-006  | 9.23095e-05 | 8.90553     | 8.90553  |
| Slc24a3  | Slc24a3-001  | 0.0432861   | 0.021367    | -46.8011 |
| Slc25a1  | Slc25a1-006  | 0.0269233   | 0.67981     | -1.471   |
| Slc25a11 | Slc25a11-001 | 0.0425642   | 0.77097     | -1.29707 |
| Slc25a20 | Slc25a20-001 | 0.0195869   | 0.752259    | -1.32933 |
| Slc25a23 | Slc25a23-002 | 0.0120193   | 1.542       | 1.542    |
| Slc25a24 | Slc25a24-001 | 1.5047e-07  | 0.698913    | -1.43079 |
| Slc25a25 | Slc25a25-008 | 0.0359505   | 0.0007185   | -1391.79 |
| Slc25a25 | Slc25a25-002 | 0.03393     | 2.59427     | 2.59427  |
| Slc25a33 | Slc25a33-001 | 0.0284432   | 1.30577     | 1.30577  |
| Slc25a37 | Slc25a37-001 | 0.0102229   | 0.131186    | -7.62278 |
| Slc25a37 | Slc25a37-003 | 0.0191002   | 1.91267     | 1.91267  |
| Slc25a39 | Slc25a39-008 | 0.0272944   | 0.000564104 | -1772.72 |
| Slc25a39 | Slc25a39-002 | 0.0134447   | 1.39986     | 1.39986  |
| Slc25a39 | Slc25a39-010 | 0.0420646   | 15.0178     | 15.0178  |
| Slc25a40 | Slc25a40-003 | 0.025846    | 0.349783    | -2.85891 |
| Slc25a40 | Slc25a40-002 | 0.0118021   | 1.7262      | 1.7262   |
| Slc25a51 | Slc25a51-201 | 0.0177051   | 0.841406    | -1.18849 |
| Slc25a51 | Slc25a51-001 | 0.0177226   | 0.84143     | -1.18845 |
| Slc25a51 | Slc25a51-003 | 6.62705e-05 | 1.47986     | 1.47986  |
| Slc25a53 | Slc25a53-004 | 0.0273269   | 3.60146     | 3.60146  |
| Slc26a11 | Slc26a11-001 | 0.00597946  | 1.41796     | 1.41796  |
| Slc26a11 | Slc26a11-004 | 0.00142247  | 4.01523     | 4.01523  |
| Slc29a1  | Slc29a1-015  | 0.0320127   | 5.02662e-06 | -198941  |
| Slc29a1  | Slc29a1-024  | 0.0336218   | 0.483134    | -2.06982 |
| Slc29a1  | Slc29a1-003  | 0.0204344   | 0.682503    | -1.4652  |
| Slc2a6   | Slc2a6-001   | 0.0459455   | 0.583059    | -1.71509 |
| Slc2a6   | Slc2a6-003   | 0.00139213  | 2.71951     | 2.71951  |
| Slc2a8   | Slc2a8-001   | 0.0149193   | 0.727202    | -1.37513 |
| Slc30a1  | Slc30a1-002  | 0.0110469   | 237.798     | 237.798  |
| Slc30a5  | Slc30a5-201  | 0.0180217   | 1.32215     | 1.32215  |
| Slc30a9  | Slc30a9-006  | 0.0219662   | 0.912414    | -1.09599 |
| Slc30a9  | Slc30a9-005  | 0.00731947  | 1.55594     | 1.55594  |
| Slc35a3  | Slc35a3-002  | 0.0383979   | 2.00756     | 2.00756  |
| Slc35a5  | Slc35a5-006  | 0.00847915  | 0.392178    | -2.54986 |
| Slc35a5  | Slc35a5-002  | 0.034245    | 10.0065     | 10.0065  |
| Slc35b4  | Slc35b4-002  | 0.0326528   | 1.47323     | 1.47323  |
| Slc35c2  | Slc35c2-014  | 0.012023    | 1.63367     | 1.63367  |
| Slc35c2  | Slc35c2-001  | 0.00034954  | 9.43847     | 9.43847  |
| Slc35e2  | Slc35e2-003  | 0.0373079   | 1.33523     | 1.33523  |

|          |              |             |             |             |
|----------|--------------|-------------|-------------|-------------|
| Slc35e3  | Slc35e3-201  | 0.0421818   | 1.23081     | 1.23081     |
| Slc35e4  | Slc35e4-201  | 0.0333636   | 0.766899    | -1.30395    |
| Slc37a1  | Slc37a1-202  | 0.0205517   | 0.489809    | -2.04161    |
| Slc37a2  | Slc37a2-004  | 0.0319185   | 7.23444     | 7.23444     |
| Slc37a3  | Slc37a3-003  | 0.0237139   | 10.0859     | 10.0859     |
| Slc38a1  | Slc38a1-203  | 0.0229894   | 1.31272     | 1.31272     |
| Slc38a10 | Slc38a10-012 | 0.00805726  | 0.448676    | -2.22878    |
| Slc38a10 | Slc38a10-001 | 0.00209542  | 0.623273    | -1.60443    |
| Slc38a10 | Slc38a10-201 | 0.000115527 | 0.675356    | -1.4807     |
| Slc38a10 | Slc38a10-004 | 0.0292983   | 0.782182    | -1.27847    |
| Slc38a6  | Slc38a6-001  | 0.0215907   | 1.15119     | 1.15119     |
| Slc38a7  | Slc38a7-001  | 0.000261074 | 1.36959     | 1.36959     |
| Slc38a7  | Slc38a7-002  | 3.43842e-05 | 1.75022     | 1.75022     |
| Slc39a1  | Slc39a1-001  | 0.00205786  | 0.846709    | -1.18104    |
| Slc39a12 | Slc39a12-002 | 0.0416013   | 0.417712    | -2.39399    |
| Slc39a13 | Slc39a13-002 | 0.0376496   | 1.86434     | 1.86434     |
| Slc39a13 | Slc39a13-012 | 0.0236631   | 6.76812     | 6.76812     |
| Slc39a14 | Slc39a14-001 | 0.0118605   | 1.43508     | 1.43508     |
| Slc3a2   | Slc3a2-009   | 0.0280861   | 0.0461903   | -21.6496    |
| Slc3a2   | Slc3a2-002   | 0.000591014 | 0.853195    | -1.17207    |
| Slc41a1  | Slc41a1-001  | 0.0112574   | 1.35405     | 1.35405     |
| Slc41a2  | Slc41a2-001  | 0.00489493  | 0.819801    | -1.21981    |
| Slc43a2  | Slc43a2-001  | 0.0252506   | 0.337177    | -2.9658     |
| Slc44a1  | Slc44a1-006  | 0.0171215   | 0.791884    | -1.26281    |
| Slc44a2  | Slc44a2-201  | 0.00995228  | 0.660051    | -1.51503    |
| Slc45a4  | Slc45a4-001  | 0.00162275  | 0.290242    | -3.4454     |
| Slc45a4  | Slc45a4-201  | 0.0478441   | 0.349987    | -2.85725    |
| Slc48a1  | Slc48a1-001  | 0.00274972  | 1.45528     | 1.45528     |
| Slc4a1ap | Slc4a1ap-003 | 0.042604    | 0.144362    | -6.92705    |
| Slc4a1ap | Slc4a1ap-201 | 0.00529055  | 1.90769     | 1.90769     |
| Slc4a2   | Slc4a2-002   | 0.00882881  | 0.341713    | -2.92644    |
| Slc4a3   | Slc4a3-001   | 0.0456365   | 0.317868    | -3.14596    |
| Slc4a8   | Slc4a8-001   | 0.0341677   | 0.690233    | -1.44879    |
| Slc6a15  | Slc6a15-202  | 0.00767021  | 1.21502     | 1.21502     |
| Slc6a17  | Slc6a17-003  | 0.0383667   | 0.215325    | -4.64414    |
| Slc6a17  | Slc6a17-010  | 0.0310229   | 3.57187e+08 | 3.57187e+08 |
| Slc6a6   | Slc6a6-001   | 0.0066876   | 0.736197    | -1.35833    |
| Slc6a8   | Slc6a8-015   | 0.0332014   | 0.00200838  | -497.913    |
| Slc6a8   | Slc6a8-014   | 0.0261982   | 2.739e+08   | 2.739e+08   |
| Slc7a3   | Slc7a3-201   | 0.0104236   | 1.68426     | 1.68426     |
| Slc7a3   | Slc7a3-003   | 0.00665556  | 2.41414     | 2.41414     |
| Slc7a5   | Slc7a5-001   | 0.0151691   | 0.765761    | -1.30589    |
| Slc8a1   | Slc8a1-201   | 0.039901    | 0.688589    | -1.45224    |



|          |              |             |             |          |
|----------|--------------|-------------|-------------|----------|
| Slc8a2   | Slc8a2-201   | 0.00105156  | 0.659002    | -1.51745 |
| Slc8b1   | Slc8b1-001   | 0.0100635   | 0.506313    | -1.97506 |
| Slc9a7   | Slc9a7-002   | 0.0345408   | 0.000330554 | -3025.22 |
| Slco1a6  | Slco1a6-001  | 0.0346449   | 2.26338     | 2.26338  |
| Slco3a1  | Slco3a1-006  | 0.035664    | 0.220881    | -4.52733 |
| Slco3a1  | Slco3a1-002  | 0.000746462 | 0.672693    | -1.48656 |
| Slfn5    | Slfn5-001    | 0.0241311   | 0.592341    | -1.68822 |
| Slit2    | Slit2-001    | 0.0188646   | 0.455493    | -2.19542 |
| Slit2    | Slit2-007    | 0.00751037  | 0.509905    | -1.96115 |
| Slit2    | Slit2-012    | 0.0226431   | 2.25003     | 2.25003  |
| Slit2    | Slit2-021    | 0.000180358 | 2.69539     | 2.69539  |
| Slit2    | Slit2-003    | 0.0082263   | 3.01014     | 3.01014  |
| Slitrk3  | Slitrk3-001  | 0.0411895   | 0.190912    | -5.23802 |
| Slk      | Slk-001      | 5.23506e-07 | 0.622917    | -1.60535 |
| Slk      | Slk-002      | 0.0167191   | 1.48697     | 1.48697  |
| Slu7     | Slu7-002     | 0.00760179  | 1.36397     | 1.36397  |
| Slx1b    | Slx1b-003    | 0.0387002   | 0.0394494   | -25.3489 |
| Slx4     | Slx4-004     | 0.0455385   | 3.80351     | 3.80351  |
| Smad4    | Smad4-001    | 0.00107281  | 0.871678    | -1.14721 |
| Smad5    | Smad5-005    | 0.0305782   | 0.0511966   | -19.5325 |
| Smad5    | Smad5-001    | 1.83659e-07 | 0.581016    | -1.72112 |
| Smad5    | Smad5-004    | 0.0226589   | 7.66765     | 7.66765  |
| Smad7    | Smad7-003    | 0.0415941   | 8.76567     | 8.76567  |
| Smad9    | Smad9-001    | 0.0458861   | 1.66987     | 1.66987  |
| Smadp1   | Smadp1-001   | 0.0463501   | 1.1821      | 1.1821   |
| Smadp2   | Smadp2-001   | 0.0149819   | 1.18085     | 1.18085  |
| Smarca2  | Smarca2-006  | 0.0285884   | 0.805338    | -1.24172 |
| Smarcad1 | Smarcad1-005 | 0.0447868   | 1.89229     | 1.89229  |
| Smarcad1 | Smarcad1-004 | 0.018037    | 3.82312     | 3.82312  |
| Smarcal1 | Smarcal1-010 | 0.042957    | 3.77868     | 3.77868  |
| Smarcb1  | Smarcb1-004  | 0.010757    | 1.45716     | 1.45716  |
| Smarcc1  | Smarcc1-002  | 0.0175915   | 1.80535     | 1.80535  |
| Smarcd2  | Smarcd2-001  | 0.0155352   | 0.755905    | -1.32292 |
| Smc3     | Smc3-001     | 0.0165472   | 1.30644     | 1.30644  |
| Smc3     | Smc3-002     | 0.00537202  | 1.73875     | 1.73875  |
| Smc4     | Smc4-001     | 0.00308245  | 0.790507    | -1.26501 |
| Smco4    | Smco4-202    | 0.0135698   | 1.55186     | 1.55186  |
| Smcr8    | Smcr8-201    | 0.0166539   | 1.30602     | 1.30602  |
| Smcr8    | Smcr8-001    | 0.0467976   | 1.53411     | 1.53411  |
| Smek2    | Smek2-003    | 0.00263247  | 1.253       | 1.253    |
| Smek2    | Smek2-001    | 0.0120287   | 7.16802     | 7.16802  |
| Smg1     | Smg1-001     | 0.000551708 | 0.704047    | -1.42036 |
| Smg1     | Smg1-005     | 0.00210987  | 3.89022     | 3.89022  |

|          |               |             |           |          |
|----------|---------------|-------------|-----------|----------|
| Smg5     | Smg5-002      | 0.0246823   | 1.4687    | 1.4687   |
| Smg6     | Smg6-001      | 0.0149266   | 1.15971   | 1.15971  |
| Smg6     | Smg6-005      | 0.0204424   | 1.9104    | 1.9104   |
| Smim10l1 | Smim10l1-002  | 0.021709    | 1.32129   | 1.32129  |
| Smim17   | Smim17-001    | 0.0467026   | 2.59535   | 2.59535  |
| Smim17   | Smim17-003    | 0.0401796   | 228137    | 228137   |
| Smim24   | Smim24-002    | 0.011091    | 0.0742042 | -13.4763 |
| Smim24   | Smim24-001    | 0.0308991   | 3.91641   | 3.91641  |
| Smim4    | Smim4-201     | 0.0395298   | 2.16113   | 2.16113  |
| Smndc1   | Smndc1-201    | 0.0011265   | 1.42008   | 1.42008  |
| Smpd4    | Smpd4-022     | 0.0496227   | 1.67512   | 1.67512  |
| Smpd4    | Smpd4-012     | 0.0423583   | 2.78889   | 2.78889  |
| Sms      | Sms-001       | 0.000289744 | 0.580334  | -1.72315 |
| Sms      | Sms-005       | 0.00186583  | 0.815483  | -1.22627 |
| Smtn     | Smtn-009      | 0.0074167   | 1.80645   | 1.80645  |
| Smu1     | Smu1-001      | 0.0465875   | 1.21499   | 1.21499  |
| Smyd2    | Smyd2-001     | 0.0448522   | 0.850758  | -1.17542 |
| Smyd2    | Smyd2-002     | 0.000197603 | 1.91102   | 1.91102  |
| Smyd3    | Smyd3-002     | 0.00378276  | 1.98602   | 1.98602  |
| Smyd3    | Smyd3-003     | 0.0202515   | 2.13232   | 2.13232  |
| Smyd3    | Smyd3-004     | 0.000286685 | 2.31573   | 2.31573  |
| Smyd3    | Smyd3-007     | 0.0102558   | 3.21042   | 3.21042  |
| Snap23   | Snap23-002    | 0.0417661   | 1.55872   | 1.55872  |
| Snap47   | Snap47-001    | 0.00729164  | 1.27864   | 1.27864  |
| Snap91   | Snap91-008    | 0.0178469   | 2.10043   | 2.10043  |
| Snapc1   | Snapc1-201    | 0.0131715   | 1.2179    | 1.2179   |
| Snapc4   | Snapc4-011    | 0.0145977   | 0.473717  | -2.11097 |
| Sncg     | Sncg-001      | 0.0413924   | 0.513756  | -1.94645 |
| Snd1     | Snd1-002      | 0.0389968   | 1.45106   | 1.45106  |
| Snd1     | Snd1-012      | 0.00256539  | 2.18985   | 2.18985  |
| Snhg1    | Snhg1-007     | 0.0149617   | 3.92142   | 3.92142  |
| Snhg14   | Snhg14-002    | 0.0354128   | 0.697691  | -1.4333  |
| Snhg17   | Snhg17-003    | 0.00893039  | 0.876292  | -1.14117 |
| Snhg20   | Snhg20-001    | 0.0180516   | 1.72846   | 1.72846  |
| Snhg3    | Snhg3-002     | 0.00719638  | 5.63661   | 5.63661  |
| Snhg5    | Snhg5-001     | 0.0428757   | 1.15045   | 1.15045  |
| Snhg6    | Snhg6-004     | 0.0155051   | 0.801046  | -1.24837 |
| Snhg7os  | Snhg7os-001   | 0.0406955   | 3.15255   | 3.15255  |
| Snora17  | Snora17-201   | 0.0383839   | 2.3487    | 2.3487   |
| Snora2b  | Snora2b-201   | 0.0178118   | 2.82497   | 2.82497  |
| Snora43  | Snora43-201   | 0.0368566   | 9.62124   | 9.62124  |
| SNORA50  | SNORA50.1-201 | 0.002067    | 5.69789   | 5.69789  |
| Snord100 | Snord100-201  | 0.00315243  | 0.329785  | -3.03228 |

|          |              |             |          |          |
|----------|--------------|-------------|----------|----------|
| Snord16a | Snord16a-201 | 0.0221093   | 1.82811  | 1.82811  |
| Snrk     | Snrk-001     | 0.0185362   | 0.833886 | -1.1992  |
| Snrnp200 | Snrnp200-001 | 0.00127359  | 1.43757  | 1.43757  |
| Snrnp25  | Snrnp25-001  | 0.0202369   | 1.4241   | 1.4241   |
| Snrnp27  | Snrnp27-001  | 0.00418255  | 1.21655  | 1.21655  |
| Snrnp48  | Snrnp48-201  | 0.0369737   | 1.71293  | 1.71293  |
| Snrnp70  | Snrnp70-004  | 0.000285949 | 0.441719 | -2.26388 |
| Snrnp70  | Snrnp70-001  | 0.00146986  | 1.49028  | 1.49028  |
| Snrnp70  | Snrnp70-013  | 0.017675    | 1.61124  | 1.61124  |
| Snrnp70  | Snrnp70-010  | 0.0195321   | 1.98218  | 1.98218  |
| Snrpa    | Snrpa-006    | 0.00533663  | 0.367499 | -2.72109 |
| Snrpa    | Snrpa-001    | 0.0345011   | 1.34924  | 1.34924  |
| Snrpa    | Snrpa-201    | 0.00396874  | 1.39506  | 1.39506  |
| Snrpa1   | Snrpa1-003   | 0.0288027   | 0.616279 | -1.62264 |
| Snrpa1   | Snrpa1-002   | 0.0124302   | 2.03296  | 2.03296  |
| Snrpa1   | Snrpa1-001   | 0.00130948  | 2.10801  | 2.10801  |
| Snrpb    | Snrpb-001    | 0.0331364   | 0.635002 | -1.5748  |
| Snrpe    | Snrpe-004    | 0.0286344   | 2.49099  | 2.49099  |
| Snrpn    | Snrpn-001    | 0.00086168  | 1.31862  | 1.31862  |
| Snx1     | Snx1-002     | 0.0261204   | 2.00416  | 2.00416  |
| Snx12    | Snx12-003    | 0.0170152   | 2.11084  | 2.11084  |
| Snx16    | Snx16-001    | 0.00138855  | 1.48827  | 1.48827  |
| Snx18    | Snx18-201    | 0.00867675  | 0.850038 | -1.17642 |
| Snx21    | Snx21-005    | 0.0474095   | 1.34668  | 1.34668  |
| Snx29    | Snx29-005    | 0.0424117   | 1.74726  | 1.74726  |
| Snx29    | Snx29-003    | 0.00746239  | 13.5274  | 13.5274  |
| Snx3     | Snx3-003     | 0.0462954   | 1.19195  | 1.19195  |
| Snx30    | Snx30-001    | 0.0201159   | 0.806771 | -1.23951 |
| Snx33    | Snx33-201    | 0.00550894  | 1.42897  | 1.42897  |
| Snx5     | Snx5-004     | 0.0394343   | 0.62606  | -1.59729 |
| Snx6     | Snx6-201     | 0.00070379  | 1.23168  | 1.23168  |
| Snx8     | Snx8-002     | 0.0152151   | 1.82567  | 1.82567  |
| Soat1    | Soat1-001    | 0.0140821   | 0.711382 | -1.40571 |
| Sobp     | Sobp-001     | 0.000690359 | 0.793112 | -1.26086 |
| Socs2    | Socs2-001    | 0.000666317 | 0.637927 | -1.56758 |
| Socs4    | Socs4-001    | 0.0318246   | 0.842165 | -1.18742 |
| Soga1    | Soga1-001    | 0.0159698   | 0.685561 | -1.45866 |
| Soga3    | Soga3-201    | 0.00664097  | 0.845101 | -1.18329 |
| Sohlh2   | Sohlh2-001   | 0.000668874 | 1.19497  | 1.19497  |
| Sorbs3   | Sorbs3-201   | 0.00576164  | 0.544757 | -1.83568 |
| Sord     | Sord-001     | 0.000358455 | 1.22775  | 1.22775  |
| Sort1    | Sort1-004    | 0.0278227   | 0.641816 | -1.55808 |
| Sos1     | Sos1-201     | 0.00173021  | 0.798793 | -1.25189 |

|          |              |             |             |          |
|----------|--------------|-------------|-------------|----------|
| Sos2     | Sos2-001     | 0.0207127   | 0.905618    | -1.10422 |
| Sox18    | Sox18-001    | 0.0429367   | 2.18307     | 2.18307  |
| Sox4     | Sox4-001     | 0.0272564   | 0.752752    | -1.32846 |
| Sox5     | Sox5-001     | 0.0413559   | 1.71098     | 1.71098  |
| Sox5     | Sox5-201     | 0.0413559   | 1.71098     | 1.71098  |
| Sox7     | Sox7-201     | 0.0107952   | 0.37007     | -2.70219 |
| Sox8     | Sox8-001     | 3.16745e-05 | 0.66504     | -1.50367 |
| Sp1      | Sp1-005      | 0.00227088  | 2.98202     | 2.98202  |
| Sp6      | Sp6-001      | 0.0189086   | 0.541751    | -1.84587 |
| Spag4    | Spag4-002    | 0.0137944   | 5.07796     | 5.07796  |
| Spag5    | Spag5-001    | 0.000844301 | 0.884025    | -1.13119 |
| Spag5    | Spag5-003    | 0.014926    | 2.56945     | 2.56945  |
| Spag5    | Spag5-005    | 0.00986286  | 2.57573     | 2.57573  |
| Spag6l   | Spag6l-005   | 0.0145858   | 8.44273     | 8.44273  |
| Spag9    | Spag9-201    | 0.046924    | 0.651433    | -1.53508 |
| Spag9    | Spag9-008    | 0.00802466  | 0.686599    | -1.45645 |
| Sparc    | Sparc-002    | 0.00882547  | 0.530465    | -1.88514 |
| Sparc    | Sparc-001    | 0.00539554  | 0.574196    | -1.74157 |
| Spata2   | Spata2-001   | 0.00181944  | 1.74384     | 1.74384  |
| Spata33  | Spata33-201  | 0.0235984   | 2.91242     | 2.91242  |
| Spata5   | Spata5-002   | 0.0326039   | 1.28843     | 1.28843  |
| Spata5l1 | Spata5l1-002 | 0.00755095  | 3.5537      | 3.5537   |
| Spata7   | Spata7-001   | 0.0225644   | 1.48211     | 1.48211  |
| Spats2   | Spats2-201   | 0.00304194  | 1.26323     | 1.26323  |
| Spc25    | Spc25-003    | 0.0255076   | 0.543061    | -1.84142 |
| Spcs2    | Spcs2-201    | 0.00608858  | 1.28627     | 1.28627  |
| Spcs3    | Spcs3-001    | 0.0381308   | 1.11984     | 1.11984  |
| Specc1   | Specc1-008   | 0.00658017  | 2.00773e-05 | -49807.5 |
| Specc1l  | Specc1l-201  | 0.00575835  | 0.842709    | -1.18665 |
| Speg     | Speg-011     | 0.0322598   | 0.252481    | -3.9607  |
| Speg     | Speg-012     | 0.022366    | 0.308543    | -3.24104 |
| Speg     | Speg-003     | 0.0228884   | 0.830228    | -1.20449 |
| Speg     | Speg-015     | 0.02835     | 1.90061     | 1.90061  |
| Spg11    | Spg11-001    | 0.00525202  | 1.20241     | 1.20241  |
| Spg11    | Spg11-002    | 0.00586066  | 4.8488      | 4.8488   |
| Spg20    | Spg20-008    | 0.0399771   | 1.50895     | 1.50895  |
| Spg7     | Spg7-008     | 0.000487418 | 0.0559057   | -17.8873 |
| Spg7     | Spg7-002     | 0.00164267  | 0.434677    | -2.30056 |
| Spg7     | Spg7-003     | 0.0292114   | 0.652192    | -1.53329 |
| Spice1   | Spice1-003   | 0.0257461   | 1.31691     | 1.31691  |
| Spint2   | Spint2-201   | 0.0344603   | 0.407498    | -2.454   |
| Spn      | Spn-001      | 0.00894736  | 0.249045    | -4.01534 |
| Spns1    | Spns1-002    | 0.0460739   | 1.19051     | 1.19051  |

|        |            |             |          |          |
|--------|------------|-------------|----------|----------|
| Spns3  | Spns3-001  | 0.0300163   | 5.91893  | 5.91893  |
| Spns3  | Spns3-002  | 0.0300163   | 5.91893  | 5.91893  |
| Spopl  | Spopl-001  | 0.00445841  | 0.764221 | -1.30852 |
| Spopl  | Spopl-005  | 0.0205064   | 1.77543  | 1.77543  |
| Sppl2a | Sppl2a-001 | 0.0407936   | 1.09885  | 1.09885  |
| Sppl2a | Sppl2a-003 | 0.00533313  | 1.85516  | 1.85516  |
| Sppl3  | Sppl3-001  | 0.00407176  | 0.865301 | -1.15567 |
| Spred1 | Spred1-001 | 0.00060027  | 0.635567 | -1.5734  |
| Spryd3 | Spryd3-001 | 0.00395841  | 1.31977  | 1.31977  |
| Spryd7 | Spryd7-002 | 0.0370323   | 1.14476  | 1.14476  |
| Spsb2  | Spsb2-002  | 0.0188083   | 0.542553 | -1.84314 |
| Sptan1 | Sptan1-012 | 0.00139051  | 0.229674 | -4.35399 |
| Sptan1 | Sptan1-003 | 0.00460481  | 0.770812 | -1.29733 |
| Sptan1 | Sptan1-001 | 0.020811    | 0.806246 | -1.24032 |
| Sptan1 | Sptan1-201 | 0.0294684   | 0.82322  | -1.21474 |
| Sptb   | Sptb-002   | 0.0129453   | 11.518   | 11.518   |
| Sptbn1 | Sptbn1-004 | 0.0122367   | 0.251396 | -3.97779 |
| Sptbn1 | Sptbn1-006 | 0.0055781   | 0.321278 | -3.11256 |
| Sptbn1 | Sptbn1-201 | 0.000456012 | 0.631058 | -1.58464 |
| Sptbn1 | Sptbn1-001 | 0.0193928   | 0.788469 | -1.26828 |
| Sptbn5 | Sptbn5-001 | 0.012843    | 6.5526   | 6.5526   |
| Sptlc2 | Sptlc2-001 | 0.0420238   | 0.635205 | -1.57429 |
| Sptlc2 | Sptlc2-005 | 0.0376223   | 1.21888  | 1.21888  |
| Sptssa | Sptssa-201 | 0.00126899  | 0.750968 | -1.33161 |
| Sqstm1 | Sqstm1-001 | 0.0471677   | 1.53267  | 1.53267  |
| Sra1   | Sra1-005   | 0.00178018  | 1.48589  | 1.48589  |
| Src    | Src-201    | 0.0155865   | 0.527734 | -1.89489 |
| Srcap  | Srcap-201  | 0.0305157   | 3.40572  | 3.40572  |
| Srfbp1 | Srfbp1-201 | 0.0457338   | 1.18431  | 1.18431  |
| Srgap2 | Srgap2-001 | 0.00818112  | 0.75171  | -1.3303  |
| Srgap3 | Srgap3-004 | 0.00298998  | 0.348982 | -2.86548 |
| Srgap3 | Srgap3-001 | 0.0240343   | 0.86357  | -1.15798 |
| Srgap3 | Srgap3-003 | 0.0264512   | 2.93464  | 2.93464  |
| Sri    | Sri-006    | 1.35227e-05 | 1.75596  | 1.75596  |
| Srl    | Srl-002    | 0.019182    | 1.74105  | 1.74105  |
| Srl    | Srl-004    | 0.0370192   | 5.31791  | 5.31791  |
| Srp54a | Srp54a-201 | 0.0416907   | 1.25951  | 1.25951  |
| Srp54b | Srp54b-201 | 0.00878333  | 1.19683  | 1.19683  |
| Srp54b | Srp54b-202 | 0.0210092   | 1.30244  | 1.30244  |
| Srp68  | Srp68-001  | 0.000930626 | 1.24696  | 1.24696  |
| Srp72  | Srp72-001  | 0.0226573   | 0.885412 | -1.12942 |
| Srp72  | Srp72-008  | 0.00161207  | 2.08702  | 2.08702  |
| Srp72  | Srp72-003  | 0.0119367   | 2.39697  | 2.39697  |

|            |                |             |            |          |
|------------|----------------|-------------|------------|----------|
| Srpk1      | Srpk1-004      | 0.0324442   | 0.806476   | -1.23996 |
| Srrm1      | Srrm1-003      | 0.00623078  | 0.886178   | -1.12844 |
| Srrm1      | Srrm1-002      | 0.0172711   | 2.29309    | 2.29309  |
| Srrm2      | Srrm2-004      | 0.0434358   | 0.799041   | -1.2515  |
| Srsf1      | Srsf1-004      | 0.00449782  | 1.3008     | 1.3008   |
| Srsf10     | Srsf10-002     | 0.00129468  | 0.584267   | -1.71154 |
| Srsf10     | Srsf10-001     | 0.00725717  | 1.28477    | 1.28477  |
| Srsf10     | Srsf10-007     | 0.0161997   | 1.72406    | 1.72406  |
| Srsf10     | Srsf10-008     | 0.00758511  | 2.06368    | 2.06368  |
| Srsf10     | Srsf10-006     | 0.0156672   | 3.17709    | 3.17709  |
| Srsf11     | Srsf11-001     | 0.0240016   | 0.612167   | -1.63354 |
| Srsf12     | Srsf12-002     | 0.00270282  | 31.2463    | 31.2463  |
| Srsf2      | Srsf2-004      | 0.0450095   | 0.8995     | -1.11173 |
| Srsf3      | Srsf3-003      | 0.0226055   | 0.728553   | -1.37258 |
| Srsf4      | Srsf4-001      | 0.0162462   | 1.12651    | 1.12651  |
| Srsf5      | Srsf5-006      | 0.000525186 | 1.37991    | 1.37991  |
| Srxn1      | Srxn1-001      | 0.0457847   | 1.466      | 1.466    |
| Ssbp1      | Ssbp1-004      | 0.0461478   | 1.60478    | 1.60478  |
| Ssbp1      | Ssbp1-002      | 0.017902    | 1.6589     | 1.6589   |
| Ssbp2      | Ssbp2-001      | 0.0190435   | 0.703523   | -1.42142 |
| Ssbp3      | Ssbp3-016      | 0.0293788   | 0.308163   | -3.24503 |
| Ssbp3      | Ssbp3-002      | 0.00838499  | 1.78791    | 1.78791  |
| Ssbp4      | Ssbp4-201      | 0.0106003   | 0.725387   | -1.37857 |
| Ssc4d      | Ssc4d-003      | 0.0408674   | 1.94157    | 1.94157  |
| Ssfa2      | Ssfa2-003      | 0.0467585   | 0.59378    | -1.68412 |
| Ssh1       | Ssh1-001       | 0.0321869   | 0.56943    | -1.75614 |
| Ssh2       | Ssh2-001       | 0.0311076   | 0.734143   | -1.36213 |
| Ssh3       | Ssh3-201       | 0.0168045   | 0.444597   | -2.24923 |
| Ssr2       | Ssr2-001       | 0.0400165   | 1.33052    | 1.33052  |
| Ssr3       | Ssr3-001       | 0.00741114  | 0.835168   | -1.19736 |
| Ssr3       | Ssr3-002       | 0.000362717 | 1.52939    | 1.52939  |
| Ssr4       | Ssr4-201       | 0.0188377   | 1.22275    | 1.22275  |
| Ssrp1      | Ssrp1-001      | 0.0267252   | 1.37256    | 1.37256  |
| Sssca1     | Sssca1-002     | 0.0459266   | 15.752     | 15.752   |
| Sstr1      | Sstr1-001      | 0.0461063   | 4.02192    | 4.02192  |
| Ssu72      | Ssu72-002      | 0.00105866  | 0.599534   | -1.66796 |
| Ssu72      | Ssu72-001      | 0.00925902  | 0.669746   | -1.4931  |
| Ssu72      | Ssu72-003      | 0.000696024 | 1.91965    | 1.91965  |
| St13       | St13-001       | 0.0464821   | 0.886669   | -1.12782 |
| St13       | St13-005       | 0.0279733   | 1.56835    | 1.56835  |
| St3gal6    | St3gal6-001    | 0.00793731  | 0.00268608 | -372.289 |
| St6gal1    | St6gal1-001    | 0.037162    | 0.568547   | -1.75887 |
| St6galnac4 | St6galnac4-004 | 0.0148863   | 0.802309   | -1.2464  |

|            |                |             |          |          |
|------------|----------------|-------------|----------|----------|
| St6galnac5 | St6galnac5-001 | 0.0400731   | 0.757259 | -1.32055 |
| St6galnac6 | St6galnac6-001 | 0.0337524   | 0.40896  | -2.44523 |
| St7l       | St7l-010       | 0.0315228   | 1.61759  | 1.61759  |
| Stam       | Stam-001       | 0.0257276   | 0.672762 | -1.48641 |
| Stam2      | Stam2-001      | 0.00222238  | 1.19805  | 1.19805  |
| Stam2      | Stam2-003      | 0.0113058   | 8.14284  | 8.14284  |
| Stamos     | Stamos-001     | 0.0040348   | 5.35945  | 5.35945  |
| Star       | Star-001       | 0.00776886  | 0.621355 | -1.60939 |
| Stard13    | Stard13-001    | 0.0232946   | 1.76116  | 1.76116  |
| Stard5     | Stard5-001     | 0.0040341   | 2.39894  | 2.39894  |
| Stard5     | Stard5-005     | 0.00691383  | 2.44874  | 2.44874  |
| Stard7     | Stard7-005     | 0.0299875   | 1.39992  | 1.39992  |
| Stard7     | Stard7-003     | 0.0125953   | 1.51676  | 1.51676  |
| Stau2      | Stau2-009      | 0.0335253   | 2.7171   | 2.7171   |
| Stau2      | Stau2-012      | 0.00720904  | 2.98161  | 2.98161  |
| Stc2       | Stc2-001       | 0.0013256   | 1.66055  | 1.66055  |
| Stc2       | Stc2-004       | 0.000857011 | 2.00079  | 2.00079  |
| Steap3     | Steap3-001     | 0.00072932  | 0.445533 | -2.2445  |
| Stk11      | Stk11-003      | 0.0182046   | 1.88161  | 1.88161  |
| Stk11ip    | Stk11ip-008    | 0.0206      | 0.320502 | -3.12011 |
| Stk11ip    | Stk11ip-005    | 0.0386316   | 64.5052  | 64.5052  |
| Stk16      | Stk16-003      | 0.0270456   | 0.353102 | -2.83205 |
| Stk25      | Stk25-005      | 0.00346594  | 0.675582 | -1.48021 |
| Stk3       | Stk3-002       | 0.045199    | 1.42406  | 1.42406  |
| Stk32a     | Stk32a-201     | 6.4038e-06  | 1.57405  | 1.57405  |
| Stk38      | Stk38-015      | 0.00686454  | 0.273798 | -3.65233 |
| Stk38l     | Stk38l-002     | 0.0040316   | 1.3887   | 1.3887   |
| Stk39      | Stk39-002      | 0.00830317  | 2.26937  | 2.26937  |
| Stmn1      | Stmn1-002      | 0.00513464  | 0.521787 | -1.91649 |
| Stmn1      | Stmn1-001      | 0.0176719   | 0.797794 | -1.25346 |
| Stmn2      | Stmn2-001      | 0.0102723   | 0.65225  | -1.53315 |
| Stradb     | Stradb-002     | 0.039573    | 1.60496  | 1.60496  |
| Strbp      | Strbp-001      | 2.96017e-05 | 1.35973  | 1.35973  |
| Strn4      | Strn4-008      | 0.0395293   | 1.5946   | 1.5946   |
| Strn4      | Strn4-006      | 0.000977305 | 2.12956  | 2.12956  |
| Stt3a      | Stt3a-001      | 0.00561394  | 1.20937  | 1.20937  |
| Stt3a      | Stt3a-006      | 0.020048    | 1.32492  | 1.32492  |
| Stt3a      | Stt3a-005      | 0.00963261  | 1.36409  | 1.36409  |
| Stx12      | Stx12-001      | 0.00127113  | 0.864141 | -1.15722 |
| Stx17      | Stx17-003      | 0.0471394   | 1.84117  | 1.84117  |
| Stx18      | Stx18-005      | 0.0130347   | 2.52564  | 2.52564  |
| Stx1a      | Stx1a-002      | 0.0159311   | 0.25127  | -3.97979 |
| Stx2       | Stx2-001       | 0.0232694   | 0.783435 | -1.27643 |

|          |              |             |           |          |
|----------|--------------|-------------|-----------|----------|
| Stx8     | Stx8-003     | 0.0108768   | 0.638834  | -1.56535 |
| Stx8     | Stx8-001     | 0.0296679   | 0.765391  | -1.30652 |
| Stxbp2   | Stxbp2-006   | 0.0238253   | 0.48739   | -2.05175 |
| Stxbp2   | Stxbp2-001   | 0.036514    | 0.793947  | -1.25953 |
| Stxbp4   | Stxbp4-001   | 0.0314922   | 1.20287   | 1.20287  |
| Stxbp4   | Stxbp4-005   | 0.0353076   | 1.91848   | 1.91848  |
| Stxbp5   | Stxbp5-004   | 0.041205    | 0.371801  | -2.68961 |
| Stxbp5   | Stxbp5-001   | 0.000675386 | 0.576459  | -1.73473 |
| Stxbp5   | Stxbp5-003   | 0.00170364  | 2.33379   | 2.33379  |
| Stxbp6   | Stxbp6-002   | 0.0152571   | 0.572911  | -1.74547 |
| Sub1     | Sub1-001     | 0.00499076  | 0.531147  | -1.88272 |
| Sucla2   | Sucla2-003   | 0.0473814   | 0.786181  | -1.27197 |
| Suclg1   | Suclg1-001   | 0.0241777   | 1.32105   | 1.32105  |
| Suclg2   | Suclg2-002   | 0.00584955  | 1.16486   | 1.16486  |
| Suds3    | Suds3-002    | 0.011318    | 1.24954   | 1.24954  |
| Sugp2    | Sugp2-002    | 0.00639086  | 0.616659  | -1.62164 |
| Sult4a1  | Sult4a1-201  | 0.043588    | 1.16544   | 1.16544  |
| Sumf1    | Sumf1-003    | 0.00132462  | 2.75573   | 2.75573  |
| Sumf1    | Sumf1-004    | 0.0141257   | 5.98691   | 5.98691  |
| Sun2     | Sun2-003     | 0.000689294 | 0.447022  | -2.23703 |
| Supt20   | Supt20-007   | 0.0487843   | 1.70761   | 1.70761  |
| Supt3    | Supt3-001    | 0.0328176   | 1.46219   | 1.46219  |
| Supt4a   | Supt4a-001   | 0.0334857   | 1.24119   | 1.24119  |
| Supt5    | Supt5-201    | 0.00799105  | 1.1732    | 1.1732   |
| Supv3l1  | Supv3l1-004  | 0.0189224   | 0.373654  | -2.67627 |
| Surf2    | Surf2-003    | 0.0360766   | 2.98437   | 2.98437  |
| Surf6    | Surf6-001    | 0.0153993   | 1.40782   | 1.40782  |
| Suv420h1 | Suv420h1-001 | 0.0087562   | 0.550558  | -1.81634 |
| Suv420h1 | Suv420h1-005 | 0.00314324  | 2.08559   | 2.08559  |
| Sv2a     | Sv2a-001     | 0.0013777   | 0.768495  | -1.30124 |
| Sv2c     | Sv2c-002     | 0.0209689   | 3.07582   | 3.07582  |
| Svip     | Svip-201     | 0.00867345  | 1.49497   | 1.49497  |
| Svopl    | Svopl-001    | 0.011236    | 2.00674   | 2.00674  |
| Swap70   | Swap70-201   | 0.00109477  | 1.62474   | 1.62474  |
| Syde1    | Syde1-201    | 0.0489397   | 1.43145   | 1.43145  |
| Syn2     | Syn2-003     | 0.000318534 | 0.509404  | -1.96308 |
| Syncrip  | Syncrip-007  | 0.03603     | 0.379852  | -2.63261 |
| Syncrip  | Syncrip-004  | 0.00831079  | 0.691195  | -1.44677 |
| Syncrip  | Syncrip-001  | 0.026237    | 0.743239  | -1.34546 |
| Syncrip  | Syncrip-008  | 0.00438683  | 4.34228   | 4.34228  |
| Syngap1  | Syngap1-007  | 0.0473729   | 0.0323376 | -30.9238 |
| Syngr1   | Syngr1-002   | 0.0019403   | 1.70365   | 1.70365  |
| Syngr2   | Syngr2-006   | 0.0378954   | 0.265428  | -3.7675  |



|        |            |             |          |          |
|--------|------------|-------------|----------|----------|
| Syng2  | Syng2-003  | 0.0385547   | 0.381518 | -2.62111 |
| Syng3  | Syng3-001  | 0.0323565   | 0.874595 | -1.14339 |
| Synj2  | Synj2-002  | 0.000488735 | 0.214244 | -4.66757 |
| Synj2  | Synj2-014  | 0.0244447   | 0.526725 | -1.89852 |
| Synj2  | Synj2-006  | 0.0226631   | 0.567092 | -1.76338 |
| Synj2  | Synj2-011  | 0.0332676   | 8.15778  | 8.15778  |
| Synpo2 | Synpo2-004 | 0.0272398   | 0.443387 | -2.25537 |
| Synpo2 | Synpo2-001 | 0.0314051   | 0.672122 | -1.48783 |
| Syp    | Syp-001    | 0.039453    | 1.21556  | 1.21556  |
| Syp    | Syp-006    | 0.00796143  | 6.21513  | 6.21513  |
| Sypl   | Sypl-001   | 0.00110464  | 0.724068 | -1.38108 |
| Sypl   | Sypl-002   | 0.0126966   | 1.32963  | 1.32963  |
| Syt1   | Syt1-001   | 0.00858207  | 0.655023 | -1.52666 |
| Syt1   | Syt1-006   | 0.000204519 | 0.809308 | -1.23562 |
| Syt11  | Syt11-201  | 0.00127933  | 0.794638 | -1.25844 |
| Syt15  | Syt15-001  | 0.0205697   | 1.35088  | 1.35088  |
| Syt4   | Syt4-201   | 0.000299053 | 1.43498  | 1.43498  |
| Syt7   | Syt7-203   | 0.00193859  | 0.542926 | -1.84187 |
| Syt9   | Syt9-001   | 0.00252465  | 1.70683  | 1.70683  |
| Syt14  | Syt14-003  | 0.0421536   | 1.58877  | 1.58877  |
| Szrd1  | Szrd1-002  | 0.0184234   | 1.28812  | 1.28812  |
| Tab2   | Tab2-001   | 0.0452586   | 1.08729  | 1.08729  |
| Tac2   | Tac2-202   | 0.00481312  | 6.82523  | 6.82523  |
| Tacc3  | Tacc3-004  | 0.00162202  | 5.21611  | 5.21611  |
| Tada1  | Tada1-001  | 0.0163084   | 1.27856  | 1.27856  |
| Tada3  | Tada3-006  | 0.00127121  | 0.124754 | -8.0158  |
| Taf1   | Taf1-005   | 0.0284109   | 1.36291  | 1.36291  |
| Taf10  | Taf10-003  | 0.0142713   | 1.23729  | 1.23729  |
| Taf11  | Taf11-001  | 0.036596    | 1.30789  | 1.30789  |
| Taf12  | Taf12-001  | 0.0342412   | 1.52023  | 1.52023  |
| Taf12  | Taf12-003  | 0.0121356   | 1.57406  | 1.57406  |
| Taf15  | Taf15-001  | 0.0300462   | 1.12774  | 1.12774  |
| Taf15  | Taf15-002  | 0.0189195   | 1.99556  | 1.99556  |
| Taf1a  | Taf1a-002  | 0.0108003   | 1.24463  | 1.24463  |
| Taf1b  | Taf1b-201  | 0.00449764  | 1.3093   | 1.3093   |
| Taf6l  | Taf6l-006  | 0.0336964   | 2.48787  | 2.48787  |
| Taf7   | Taf7-001   | 0.00619932  | 1.53141  | 1.53141  |
| Tagln2 | Tagln2-003 | 0.00210495  | 0.623918 | -1.60277 |
| Tamm41 | Tamm41-005 | 0.00627988  | 2.07218  | 2.07218  |
| Tamm41 | Tamm41-004 | 0.00494463  | 2.41232  | 2.41232  |
| Tanc1  | Tanc1-006  | 0.0136003   | 0.346741 | -2.88399 |
| Tanc2  | Tanc2-005  | 0.046062    | 1.47431  | 1.47431  |
| Tango2 | Tango2-004 | 0.0349937   | 5.69952  | 5.69952  |

|          |              |             |          |          |
|----------|--------------|-------------|----------|----------|
| Tango6   | Tango6-201   | 0.000149552 | 1.41142  | 1.41142  |
| Tank     | Tank-001     | 0.0482902   | 0.351068 | -2.84845 |
| Taok2    | Taok2-001    | 0.00114146  | 0.863221 | -1.15845 |
| Taok3    | Taok3-002    | 0.0479342   | 0.65759  | -1.52071 |
| Taok3    | Taok3-007    | 0.0380888   | 1.45828  | 1.45828  |
| Tap2     | Tap2-002     | 0.0399075   | 0.850031 | -1.17643 |
| Tapbp    | Tapbp-003    | 0.0127911   | 0.481193 | -2.07817 |
| Tapbp    | Tapbp-001    | 5.65968e-05 | 0.561383 | -1.78132 |
| Tapt1    | Tapt1-001    | 0.0326695   | 1.3712   | 1.3712   |
| Tapt1    | Tapt1-006    | 0.0252158   | 1.60146  | 1.60146  |
| Tardbp   | Tardbp-012   | 0.00965945  | 2.82442  | 2.82442  |
| Tardbp   | Tardbp-017   | 0.0118137   | 43.952   | 43.952   |
| Tars     | Tars-201     | 0.0349979   | 1.33668  | 1.33668  |
| Tarsl2   | Tarsl2-001   | 0.000201219 | 1.43255  | 1.43255  |
| Tas1r1   | Tas1r1-001   | 0.0369227   | 2.18948  | 2.18948  |
| Tasp1    | Tasp1-003    | 0.0189749   | 1.6852   | 1.6852   |
| Tasp1    | Tasp1-201    | 0.0190699   | 2.63454  | 2.63454  |
| Tatdn1   | Tatdn1-201   | 0.0129689   | 1.28569  | 1.28569  |
| Tatdn3   | Tatdn3-001   | 0.00379064  | 5.53216  | 5.53216  |
| Tax1bp1  | Tax1bp1-001  | 0.00200679  | 1.13464  | 1.13464  |
| Tax1bp3  | Tax1bp3-004  | 0.00167703  | 0.550835 | -1.81542 |
| Taz      | Taz-001      | 0.0200723   | 0.391822 | -2.55218 |
| Taz      | Taz-018      | 0.0481148   | 1.62953  | 1.62953  |
| Tbc1d10c | Tbc1d10c-201 | 0.00182515  | 0.65055  | -1.53716 |
| Tbc1d14  | Tbc1d14-006  | 0.00619023  | 0.431445 | -2.31779 |
| Tbc1d15  | Tbc1d15-201  | 0.00355001  | 1.32388  | 1.32388  |
| Tbc1d17  | Tbc1d17-001  | 0.0388703   | 0.482804 | -2.07124 |
| Tbc1d19  | Tbc1d19-007  | 0.0476538   | 2.11973  | 2.11973  |
| Tbc1d20  | Tbc1d20-001  | 0.0100735   | 1.20155  | 1.20155  |
| Tbc1d23  | Tbc1d23-201  | 0.0330858   | 1.14233  | 1.14233  |
| Tbc1d31  | Tbc1d31-003  | 0.0020892   | 3.0676   | 3.0676   |
| Tbc1d32  | Tbc1d32-201  | 2.85638e-05 | 1.57007  | 1.57007  |
| Tbc1d8b  | Tbc1d8b-001  | 0.00364561  | 1.37502  | 1.37502  |
| Tbc1d9b  | Tbc1d9b-003  | 0.0270376   | 3.52775  | 3.52775  |
| Tbc1d9b  | Tbc1d9b-004  | 0.00239379  | 4.46477  | 4.46477  |
| Tbccd1   | Tbccd1-201   | 0.0308164   | 1.38663  | 1.38663  |
| Tbce     | Tbce-006     | 0.0374601   | 2.00029  | 2.00029  |
| Tbce     | Tbce-008     | 0.000749835 | 2.18412  | 2.18412  |
| Tbcel    | Tbcel-002    | 0.0213577   | 23.2639  | 23.2639  |
| Tbk1     | Tbk1-201     | 8.79744e-05 | 1.1692   | 1.1692   |
| Tbl1xr1  | Tbl1xr1-001  | 0.00382577  | 0.655443 | -1.52569 |
| Tbl1xr1  | Tbl1xr1-004  | 0.0293855   | 0.855674 | -1.16867 |
| Tbl1xr1  | Tbl1xr1-003  | 0.0242222   | 2.7373   | 2.7373   |

|         |             |             |             |          |
|---------|-------------|-------------|-------------|----------|
| Tbl1xr1 | Tbl1xr1-006 | 0.00268499  | 2.98431     | 2.98431  |
| Tbl2    | Tbl2-002    | 0.00216114  | 1.69817     | 1.69817  |
| Tbpl1   | Tbpl1-002   | 1.72355e-06 | 1.85625     | 1.85625  |
| Tbpl1   | Tbpl1-004   | 0.000267066 | 3.07875     | 3.07875  |
| Tbrg4   | Tbrg4-004   | 0.0204875   | 1.72609     | 1.72609  |
| Tbx4    | Tbx4-002    | 0.0178841   | 1.52536     | 1.52536  |
| Tc2n    | Tc2n-001    | 0.0199294   | 1.46282     | 1.46282  |
| Tcaim   | Tcaim-001   | 0.0111297   | 1.41697     | 1.41697  |
| Tcam1   | Tcam1-001   | 0.0155446   | 0.229622    | -4.35498 |
| Tcea1   | Tcea1-001   | 0.00193772  | 1.14879     | 1.14879  |
| Tceanc  | Tceanc-001  | 0.00469011  | 1.34444     | 1.34444  |
| Tcerg1  | Tcerg1-002  | 0.0105472   | 1.40546     | 1.40546  |
| Tcerg1l | Tcerg1l-003 | 0.0295373   | 1.33306     | 1.33306  |
| Tcf23   | Tcf23-001   | 0.0454837   | 0.195075    | -5.12622 |
| Tcf3    | Tcf3-003    | 0.00465007  | 0.430703    | -2.32179 |
| Tcf3    | Tcf3-010    | 0.0107737   | 0.483283    | -2.06918 |
| Tcf4    | Tcf4-033    | 0.0200451   | 0.387745    | -2.57901 |
| Tcf4    | Tcf4-002    | 0.0266549   | 3.53434     | 3.53434  |
| Tcf4    | Tcf4-017    | 0.0355629   | 3.85277     | 3.85277  |
| Tcf4    | Tcf4-019    | 0.038112    | 4.78693     | 4.78693  |
| Tcf4    | Tcf4-054    | 0.0012055   | 4.97268     | 4.97268  |
| Tchp    | Tchp-001    | 0.0208014   | 2.01709     | 2.01709  |
| Tcirg1  | Tcirg1-010  | 0.0107135   | 1.89283e-05 | -52830.9 |
| Tcp1    | Tcp1-007    | 0.00424323  | 1.78591     | 1.78591  |
| Tcp11l1 | Tcp11l1-001 | 0.00186348  | 1.30681     | 1.30681  |
| Tcta    | Tcta-001    | 0.00451559  | 1.64332     | 1.64332  |
| Tcte2   | Tcte2-010   | 0.0270709   | 0.337649    | -2.96165 |
| Tcte2   | Tcte2-006   | 0.0422029   | 22.4274     | 22.4274  |
| Tctn1   | Tctn1-001   | 0.0226032   | 0.795397    | -1.25723 |
| Tdp1    | Tdp1-001    | 0.000606531 | 1.38689     | 1.38689  |
| Tdrd9   | Tdrd9-001   | 0.0298583   | 0.141526    | -7.06583 |
| Tdrkh   | Tdrkh-002   | 0.0478383   | 1.22939     | 1.22939  |
| Tdrkh   | Tdrkh-005   | 0.0432394   | 3.21354     | 3.21354  |
| Tdrp    | Tdrp-001    | 0.0216179   | 1.32291     | 1.32291  |
| Tead1   | Tead1-201   | 0.0484636   | 0.854734    | -1.16995 |
| Tead1   | Tead1-006   | 0.0303693   | 35.141      | 35.141   |
| Tec     | Tec-005     | 0.0234666   | 0.334793    | -2.98692 |
| Tec     | Tec-001     | 0.0469629   | 3.76017     | 3.76017  |
| Tecpr2  | Tecpr2-201  | 0.00540653  | 1.25961     | 1.25961  |
| Tefm    | Tefm-001    | 0.0206375   | 1.7512      | 1.7512   |
| Ten1    | Ten1-004    | 0.0187955   | 0.683496    | -1.46307 |
| Tenm4   | Tenm4-009   | 0.00304804  | 0.559828    | -1.78626 |
| Tesc    | Tesc-001    | 0.00214294  | 0.37754     | -2.64873 |

|          |              |             |             |              |
|----------|--------------|-------------|-------------|--------------|
| Tesc     | Tesc-006     | 0.00444727  | 0.61209     | -1.63375     |
| Tesk1    | Tesk1-003    | 0.0117392   | 0.163868    | -6.10248     |
| Tex19.1  | Tex19.1-001  | 0.0181172   | 3.12219     | 3.12219      |
| Tex2     | Tex2-001     | 0.0145468   | 0.822717    | -1.21548     |
| Tex264   | Tex264-009   | 0.0401651   | 0.00145973  | -685.056     |
| Tex264   | Tex264-003   | 0.000341612 | 0.405405    | -2.46667     |
| Tex9     | Tex9-003     | 0.0431926   | 0.113855    | -8.7831      |
| Tfb1m    | Tfb1m-201    | 0.000357092 | 1.8042      | 1.8042       |
| Tfdp2    | Tfdp2-014    | 0.0441418   | 0.046994    | -21.2793     |
| Tfdp2    | Tfdp2-002    | 0.000186854 | 0.585682    | -1.70741     |
| Tfe3     | Tfe3-014     | 0.0477456   | 2.50467     | 2.50467      |
| Tfeb     | Tfeb-009     | 0.0241069   | 0.520079    | -1.92278     |
| Tfpt     | Tfpt-002     | 0.0146849   | 2.73557     | 2.73557      |
| Tgfb1    | Tgfb1-001    | 0.0219895   | 0.355175    | -2.81551     |
| Tgfb1i1  | Tgfb1i1-008  | 0.00150046  | 526.516     | 526.516      |
| Tgfb2    | Tgfb2-001    | 0.00117525  | 0.545626    | -1.83276     |
| Tgfb1    | Tgfb1-201    | 0.0138311   | 0.736613    | -1.35757     |
| Tgfbr1   | Tgfbr1-001   | 0.00522948  | 0.724948    | -1.37941     |
| Tgfbrap1 | Tgfbrap1-006 | 0.00717843  | 1.61796     | 1.61796      |
| Tgfbrap1 | Tgfbrap1-002 | 0.0139065   | 1.88094     | 1.88094      |
| Tgs1     | Tgs1-001     | 0.0385784   | 1.39389     | 1.39389      |
| Tgs1     | Tgs1-005     | 0.00344716  | 2.37588     | 2.37588      |
| Th       | Th-006       | 0.039341    | 422.901     | 422.901      |
| Thap1    | Thap1-001    | 0.00397084  | 1.35022     | 1.35022      |
| Thap3    | Thap3-001    | 0.0168509   | 1.44063     | 1.44063      |
| Thap4    | Thap4-005    | 0.0406958   | 1.38601     | 1.38601      |
| Thap8    | Thap8-201    | 0.00633861  | 8.90179     | 8.90179      |
| Thbs3    | Thbs3-001    | 0.00185949  | 0.369561    | -2.70591     |
| Them4    | Them4-001    | 0.000792678 | 1.97141     | 1.97141      |
| Thnsl1   | Thnsl1-001   | 0.00215892  | 1.25071     | 1.25071      |
| Thra     | Thra-005     | 0.0275823   | 7.15085e-07 | -1.39844e+06 |
| Thrb     | Thrb-201     | 0.0423656   | 1.78525e+06 | 1.78525e+06  |
| Thrb     | Thrb-001     | 0.0423656   | 2.7453e+06  | 2.7453e+06   |
| Thsd7a   | Thsd7a-003   | 0.0381074   | 0.324643    | -3.08031     |
| Thsd7a   | Thsd7a-201   | 0.00351079  | 0.406       | -2.46305     |
| Thumpd2  | Thumpd2-201  | 0.0183928   | 1.25793     | 1.25793      |
| Thumpd3  | Thumpd3-001  | 0.0087958   | 1.34414     | 1.34414      |
| Tia1     | Tia1-002     | 0.0447205   | 0.00573027  | -174.512     |
| Tia1     | Tia1-018     | 0.0466087   | 1.92447     | 1.92447      |
| Tia1     | Tia1-013     | 0.0296475   | 2.84231     | 2.84231      |
| Tial1    | Tial1-001    | 0.0362123   | 0.424582    | -2.35526     |
| Tial1    | Tial1-007    | 0.00362504  | 0.638181    | -1.56695     |
| Tial1    | Tial1-003    | 0.0376006   | 2.03576     | 2.03576      |

|         |             |             |           |          |
|---------|-------------|-------------|-----------|----------|
| Tiam1   | Tiam1-009   | 0.0336925   | 0.195756  | -5.1084  |
| Tiam2   | Tiam2-201   | 0.0110832   | 0.541413  | -1.84702 |
| Tigd2   | Tigd2-001   | 0.00025197  | 1.51623   | 1.51623  |
| Timm10b | Timm10b-004 | 0.00688566  | 0.0841164 | -11.8883 |
| Timm17a | Timm17a-002 | 0.0469578   | 5.08833   | 5.08833  |
| Timm17b | Timm17b-003 | 0.0347104   | 1.26837   | 1.26837  |
| Timm8b  | Timm8b-201  | 9.92865e-06 | 1.2742    | 1.2742   |
| Timp2   | Timp2-001   | 0.0288145   | 0.810291  | -1.23413 |
| Timp3   | Timp3-001   | 0.0360413   | 0.71629   | -1.39608 |
| Tinagl1 | Tinagl1-001 | 0.000608963 | 0.139186  | -7.18461 |
| Tinf2   | Tinf2-201   | 0.0368045   | 0.896512  | -1.11543 |
| Tiprl   | Tiprl-004   | 0.0122984   | 1.25468   | 1.25468  |
| Tiprl   | Tiprl-001   | 0.00546229  | 1.25811   | 1.25811  |
| Tjap1   | Tjap1-202   | 0.0321839   | 0.661643  | -1.51139 |
| Tjp1    | Tjp1-005    | 0.0204465   | 1.66623   | 1.66623  |
| Tjp2    | Tjp2-201    | 0.0279189   | 1.58479   | 1.58479  |
| Tk1     | Tk1-001     | 0.0076927   | 0.53413   | -1.8722  |
| Tk1     | Tk1-005     | 0.0352509   | 0.691872  | -1.44535 |
| Tk2     | Tk2-201     | 0.0121087   | 1.24232   | 1.24232  |
| Tkfc    | Tkfc-201    | 0.0108407   | 0.654233  | -1.52851 |
| Tldc1   | Tldc1-201   | 0.0150166   | 1.50817   | 1.50817  |
| Tle1    | Tle1-008    | 0.00147765  | 2.11572   | 2.11572  |
| Tle3    | Tle3-005    | 0.0112445   | 0.618721  | -1.61624 |
| Tle3    | Tle3-012    | 0.0145859   | 0.722989  | -1.38315 |
| Tlk2    | Tlk2-002    | 0.0271193   | 1.80588   | 1.80588  |
| Tln2    | Tln2-202    | 0.00372745  | 0.744735  | -1.34276 |
| Tlr12   | Tlr12-001   | 0.0160248   | 0.630157  | -1.58691 |
| Tlr4    | Tlr4-002    | 0.0294059   | 5.72025   | 5.72025  |
| Tm2d3   | Tm2d3-002   | 0.0370557   | 1.3646    | 1.3646   |
| Tm6sf2  | Tm6sf2-003  | 0.0235822   | 0.23027   | -4.34272 |
| Tm6sf2  | Tm6sf2-005  | 0.0401024   | 91.0784   | 91.0784  |
| Tm7sf2  | Tm7sf2-003  | 0.0153797   | 0.346397  | -2.88686 |
| Tm9sf1  | Tm9sf1-006  | 0.0400812   | 1.64102   | 1.64102  |
| Tma16   | Tma16-003   | 0.0400463   | 1.57004   | 1.57004  |
| Tma16   | Tma16-001   | 0.00359428  | 1.79824   | 1.79824  |
| Tmbim1  | Tmbim1-003  | 0.0470673   | 0.453596  | -2.20461 |
| Tmbim1  | Tmbim1-001  | 0.0226489   | 0.643345  | -1.55438 |
| Tmbim4  | Tmbim4-003  | 0.0231496   | 1.69402   | 1.69402  |
| Tmbim6  | Tmbim6-002  | 0.032263    | 13.495    | 13.495   |
| Tmc6    | Tmc6-007    | 0.0419795   | 0.392535  | -2.54754 |
| Tmc6    | Tmc6-001    | 0.016332    | 0.733293  | -1.36371 |
| Tmc8    | Tmc8-004    | 0.013881    | 0.353646  | -2.82768 |
| Tmcc1   | Tmcc1-003   | 0.0252441   | 0.553575  | -1.80644 |

|           |               |             |          |          |
|-----------|---------------|-------------|----------|----------|
| Tmcc1     | Tmcc1-007     | 0.0460073   | 2.66859  | 2.66859  |
| Tmcc1     | Tmcc1-008     | 0.0398593   | 2.77275  | 2.77275  |
| Tmcc3     | Tmcc3-004     | 0.0183186   | 16.885   | 16.885   |
| Tmcc3os   | Tmcc3os-001   | 0.00834     | 2.00411  | 2.00411  |
| Tmco6     | Tmco6-201     | 0.0248627   | 1.34034  | 1.34034  |
| Tmed3     | Tmed3-001     | 0.0458118   | 1.12637  | 1.12637  |
| Tmed5     | Tmed5-002     | 0.0148819   | 1.70643  | 1.70643  |
| Tmed7     | Tmed7-002     | 0.00272118  | 0.704134 | -1.42018 |
| Tmed9     | Tmed9-201     | 0.0123772   | 1.18543  | 1.18543  |
| Tmeff1    | Tmeff1-001    | 0.0337804   | 0.828436 | -1.20709 |
| Tmem101   | Tmem101-002   | 0.00326859  | 9.78187  | 9.78187  |
| Tmem106a  | Tmem106a-001  | 0.000545938 | 0.596009 | -1.67783 |
| Tmem106b  | Tmem106b-005  | 0.0366054   | 2.23437  | 2.23437  |
| Tmem107   | Tmem107-001   | 0.0447803   | 0.778522 | -1.28449 |
| Tmem107   | Tmem107-002   | 0.00955772  | 2.14839  | 2.14839  |
| Tmem108   | Tmem108-003   | 1.77487e-05 | 0.366067 | -2.73174 |
| Tmem108   | Tmem108-005   | 0.0160967   | 0.566675 | -1.76468 |
| Tmem108   | Tmem108-001   | 0.0324696   | 0.575116 | -1.73878 |
| Tmem109   | Tmem109-001   | 0.0138243   | 1.41733  | 1.41733  |
| Tmem109   | Tmem109-002   | 0.0197062   | 2.50142  | 2.50142  |
| Tmem11    | Tmem11-001    | 1.15865e-05 | 1.42955  | 1.42955  |
| Tmem110   | Tmem110-001   | 0.0248915   | 0.756608 | -1.32169 |
| Tmem110   | Tmem110-002   | 0.00282905  | 2.213    | 2.213    |
| Tmem120a  | Tmem120a-001  | 0.00906895  | 0.753249 | -1.32758 |
| Tmem120b  | Tmem120b-001  | 0.0389678   | 1.51198  | 1.51198  |
| Tmem123   | Tmem123-001   | 0.00105428  | 0.445417 | -2.24509 |
| Tmem129   | Tmem129-002   | 0.00157986  | 0.714636 | -1.39931 |
| Tmem129   | Tmem129-001   | 0.0390488   | 1.28909  | 1.28909  |
| Tmem131   | Tmem131-201   | 0.00395285  | 1.29113  | 1.29113  |
| Tmem134   | Tmem134-001   | 0.0187447   | 0.213636 | -4.68086 |
| Tmem134   | Tmem134-013   | 0.0292436   | 1.49844  | 1.49844  |
| Tmem135   | Tmem135-001   | 0.00661347  | 1.21846  | 1.21846  |
| Tmem135   | Tmem135-007   | 0.0339209   | 2.13999  | 2.13999  |
| Tmem136   | Tmem136-201   | 0.0143173   | 1.27211  | 1.27211  |
| Tmem144   | Tmem144-002   | 0.0207187   | 2.45711  | 2.45711  |
| Tmem147os | Tmem147os-001 | 0.0174928   | 1.88987  | 1.88987  |
| Tmem150a  | Tmem150a-001  | 0.0144909   | 0.590346 | -1.69392 |
| Tmem151a  | Tmem151a-001  | 0.0204322   | 1.16764  | 1.16764  |
| Tmem151b  | Tmem151b-201  | 0.00160006  | 0.39892  | -2.50677 |
| Tmem161a  | Tmem161a-006  | 0.0148902   | 3.20027  | 3.20027  |
| Tmem161a  | Tmem161a-014  | 0.0292394   | 24.369   | 24.369   |
| Tmem164   | Tmem164-005   | 0.00461476  | 0.294276 | -3.39817 |
| Tmem164   | Tmem164-008   | 0.00599147  | 0.3028   | -3.30251 |

|          |              |             |          |          |
|----------|--------------|-------------|----------|----------|
| Tmem164  | Tmem164-002  | 0.00469947  | 0.430381 | -2.32352 |
| Tmem164  | Tmem164-001  | 0.0231264   | 0.685638 | -1.45849 |
| Tmem168  | Tmem168-001  | 0.0017099   | 0.776107 | -1.28848 |
| Tmem168  | Tmem168-003  | 0.0246925   | 1.81617  | 1.81617  |
| Tmem170  | Tmem170-201  | 0.00932011  | 1.21348  | 1.21348  |
| Tmem173  | Tmem173-201  | 0.000459405 | 0.41387  | -2.41622 |
| Tmem176b | Tmem176b-004 | 0.0124714   | 0.514224 | -1.94468 |
| Tmem176b | Tmem176b-007 | 0.0325694   | 0.735431 | -1.35975 |
| Tmem177  | Tmem177-001  | 4.00155e-05 | 1.60324  | 1.60324  |
| Tmem183a | Tmem183a-001 | 0.00548458  | 0.712037 | -1.40442 |
| Tmem183a | Tmem183a-002 | 0.00714009  | 1.57034  | 1.57034  |
| Tmem184a | Tmem184a-001 | 0.0319465   | 24.4868  | 24.4868  |
| Tmem19   | Tmem19-201   | 0.0270604   | 0.789855 | -1.26606 |
| Tmem194b | Tmem194b-001 | 0.00120544  | 3.53531  | 3.53531  |
| Tmem198b | Tmem198b-001 | 0.0165935   | 0.68891  | -1.45157 |
| Tmem199  | Tmem199-001  | 0.0112082   | 1.52082  | 1.52082  |
| Tmem199  | Tmem199-004  | 0.00531783  | 1.57615  | 1.57615  |
| Tmem2    | Tmem2-201    | 0.00807362  | 0.627174 | -1.59445 |
| Tmem2    | Tmem2-202    | 0.00322893  | 0.636839 | -1.57026 |
| Tmem203  | Tmem203-001  | 0.028177    | 1.4165   | 1.4165   |
| Tmem206  | Tmem206-001  | 0.0152075   | 1.19974  | 1.19974  |
| Tmem208  | Tmem208-004  | 0.0113758   | 1.7066   | 1.7066   |
| Tmem209  | Tmem209-001  | 0.0141664   | 0.858643 | -1.16463 |
| Tmem209  | Tmem209-005  | 0.0224308   | 1.38375  | 1.38375  |
| Tmem209  | Tmem209-003  | 0.0226912   | 1.59931  | 1.59931  |
| Tmem214  | Tmem214-004  | 0.00172313  | 2.01621  | 2.01621  |
| Tmem216  | Tmem216-002  | 0.0123684   | 2.7718   | 2.7718   |
| Tmem218  | Tmem218-201  | 0.000145796 | 1.79509  | 1.79509  |
| Tmem222  | Tmem222-004  | 0.0352503   | 1.66262  | 1.66262  |
| Tmem222  | Tmem222-005  | 0.0157742   | 1.85616  | 1.85616  |
| Tmem234  | Tmem234-010  | 0.0464252   | 1.85975  | 1.85975  |
| Tmem240  | Tmem240-003  | 0.0445155   | 1.29561  | 1.29561  |
| Tmem243  | Tmem243-004  | 0.0254342   | 0.674731 | -1.48207 |
| Tmem245  | Tmem245-001  | 0.0234837   | 0.905847 | -1.10394 |
| Tmem248  | Tmem248-001  | 0.0425492   | 1.2749   | 1.2749   |
| Tmem253  | Tmem253-201  | 0.00338013  | 1.90679  | 1.90679  |
| Tmem256  | Tmem256-002  | 0.0341281   | 0.310472 | -3.2209  |
| Tmem256  | Tmem256-004  | 0.017899    | 0.410465 | -2.43626 |
| Tmem259  | Tmem259-005  | 0.00135295  | 1.97071  | 1.97071  |
| Tmem261  | Tmem261-001  | 0.00560611  | 1.59002  | 1.59002  |
| Tmem28   | Tmem28-001   | 0.00830335  | 0.344126 | -2.90592 |
| Tmem30a  | Tmem30a-001  | 0.000194822 | 0.738177 | -1.35469 |
| Tmem30a  | Tmem30a-003  | 0.00570087  | 1.6101   | 1.6101   |

|         |             |             |           |          |
|---------|-------------|-------------|-----------|----------|
| Tmem33  | Tmem33-002  | 0.0360202   | 2.02223   | 2.02223  |
| Tmem37  | Tmem37-001  | 0.00523462  | 1.41121   | 1.41121  |
| Tmem39a | Tmem39a-003 | 0.00198837  | 1.48029   | 1.48029  |
| Tmem39a | Tmem39a-004 | 0.00161205  | 1.69254   | 1.69254  |
| Tmem39a | Tmem39a-011 | 0.0458816   | 3.36294   | 3.36294  |
| Tmem39b | Tmem39b-001 | 0.0172595   | 1.43461   | 1.43461  |
| Tmem39b | Tmem39b-003 | 0.0285412   | 13.3161   | 13.3161  |
| Tmem41b | Tmem41b-003 | 0.00170402  | 1.2336    | 1.2336   |
| Tmem41b | Tmem41b-005 | 0.0193642   | 1.37922   | 1.37922  |
| Tmem41b | Tmem41b-004 | 0.0222307   | 2.02091   | 2.02091  |
| Tmem43  | Tmem43-002  | 0.00233403  | 0.0812753 | -12.3039 |
| Tmem43  | Tmem43-001  | 0.00468836  | 0.768887  | -1.30058 |
| Tmem50b | Tmem50b-001 | 0.0013145   | 0.776907  | -1.28716 |
| Tmem55b | Tmem55b-007 | 0.015903    | 2.28835   | 2.28835  |
| Tmem56  | Tmem56-001  | 0.0298711   | 0.699204  | -1.4302  |
| Tmem56  | Tmem56-002  | 0.0101019   | 2.03241   | 2.03241  |
| Tmem59  | Tmem59-002  | 0.0236012   | 0.747559  | -1.33769 |
| Tmem60  | Tmem60-001  | 0.0187694   | 1.24125   | 1.24125  |
| Tmem62  | Tmem62-001  | 0.0161765   | 1.68242   | 1.68242  |
| Tmem63a | Tmem63a-003 | 0.0376183   | 0.217938  | -4.58845 |
| Tmem63b | Tmem63b-001 | 0.000249261 | 0.755189  | -1.32417 |
| Tmem63b | Tmem63b-007 | 0.01897     | 1.33577   | 1.33577  |
| Tmem63b | Tmem63b-008 | 0.0427345   | 1.44563   | 1.44563  |
| Tmem65  | Tmem65-001  | 0.0136151   | 1.19224   | 1.19224  |
| Tmem68  | Tmem68-006  | 0.0452749   | 10.6146   | 10.6146  |
| Tmem71  | Tmem71-201  | 0.00227874  | 2.13156   | 2.13156  |
| Tmem74b | Tmem74b-002 | 0.00794287  | 0.145462  | -6.87467 |
| Tmem74b | Tmem74b-001 | 0.00350265  | 3.47581   | 3.47581  |
| Tmem79  | Tmem79-003  | 0.0334999   | 0.447576  | -2.23426 |
| Tmem79  | Tmem79-004  | 0.0470415   | 2.41689   | 2.41689  |
| Tmem8   | Tmem8-001   | 0.0349915   | 1.53632   | 1.53632  |
| Tmem8   | Tmem8-002   | 0.00841059  | 5.94469   | 5.94469  |
| Tmem80  | Tmem80-004  | 0.0120773   | 2.10636   | 2.10636  |
| Tmem9   | Tmem9-005   | 0.0177009   | 0.0428831 | -23.3192 |
| Tmem9   | Tmem9-001   | 0.000147124 | 0.574313  | -1.74121 |
| Tmem91  | Tmem91-002  | 0.0344813   | 4.43479   | 4.43479  |
| Tmem9b  | Tmem9b-002  | 0.0227607   | 2.35746   | 2.35746  |
| Tmigd3  | Tmigd3-006  | 0.0290194   | 356.935   | 356.935  |
| Tmigd3  | Tmigd3-004  | 0.0120261   | 656.608   | 656.608  |
| Tmod1   | Tmod1-001   | 0.0169296   | 0.664964  | -1.50384 |
| Tmod2   | Tmod2-201   | 0.0332069   | 0.585034  | -1.7093  |
| Tmpo    | Tmpo-201    | 0.0339463   | 1.27375   | 1.27375  |
| Tmsb10  | Tmsb10-001  | 0.00194026  | 0.828668  | -1.20676 |



|           |               |             |             |              |
|-----------|---------------|-------------|-------------|--------------|
| Tmsb4x    | Tmsb4x-001    | 0.00170471  | 0.531524    | -1.88138     |
| Tmtc1     | Tmtc1-002     | 0.012798    | 9.7339      | 9.7339       |
| Tmtc2     | Tmtc2-001     | 0.000683496 | 0.665305    | -1.50307     |
| Tmtc3     | Tmtc3-003     | 0.00981368  | 8.20838     | 8.20838      |
| Tmub1     | Tmub1-005     | 0.0231397   | 0.188771    | -5.29743     |
| Tmub1     | Tmub1-001     | 0.00275682  | 2.11145     | 2.11145      |
| Tmx3      | Tmx3-201      | 0.0148849   | 0.830372    | -1.20428     |
| Tmx4      | Tmx4-001      | 0.00615894  | 1.27794     | 1.27794      |
| Tnfaip2   | Tnfaip2-011   | 0.0294755   | 406.214     | 406.214      |
| Tnfaip3   | Tnfaip3-002   | 0.0124354   | 0.216725    | -4.61414     |
| Tnfrsf12a | Tnfrsf12a-201 | 0.0133864   | 1.18579     | 1.18579      |
| Tnfrsf25  | Tnfrsf25-004  | 0.040923    | 0.555854    | -1.79903     |
| Tnfrsf25  | Tnfrsf25-002  | 0.0146227   | 0.576879    | -1.73347     |
| Tnfrsf9   | Tnfrsf9-202   | 0.000866033 | 0.0647954   | -15.4332     |
| Tnfsf12   | Tnfsf12-001   | 0.000351737 | 1.58035     | 1.58035      |
| Tnip2     | Tnip2-007     | 0.0262828   | 0.572744    | -1.74598     |
| Tnk2      | Tnk2-005      | 0.0106579   | 1.96526     | 1.96526      |
| Tnks      | Tnks-201      | 0.0126412   | 0.825091    | -1.21199     |
| Tnni1     | Tnni1-001     | 0.0435874   | 0.323549    | -3.09072     |
| Tnnt2     | Tnnt2-004     | 0.0284883   | 0.000378816 | -2639.8      |
| Tnnt2     | Tnnt2-006     | 0.0226049   | 0.217852    | -4.59027     |
| Tnpo1     | Tnpo1-003     | 0.00556123  | 2.27979     | 2.27979      |
| Tnpo2     | Tnpo2-202     | 0.0108168   | 0.840763    | -1.1894      |
| Tnpo2     | Tnpo2-201     | 0.00288515  | 0.871318    | -1.14769     |
| Tnpo3     | Tnpo3-010     | 0.040583    | 0.558826    | -1.78947     |
| Tnrc6a    | Tnrc6a-001    | 0.00401424  | 0.884721    | -1.1303      |
| Tnrc6a    | Tnrc6a-005    | 0.0394921   | 1.23994     | 1.23994      |
| Tnrc6c    | Tnrc6c-003    | 0.00301543  | 0.640685    | -1.56083     |
| Tnrc6c    | Tnrc6c-004    | 0.0181035   | 0.712014    | -1.40447     |
| Tns1      | Tns1-201      | 0.00121772  | 0.55876     | -1.78968     |
| Tns1      | Tns1-008      | 0.0314131   | 0.572769    | -1.7459      |
| Tns1      | Tns1-001      | 0.0392967   | 0.603627    | -1.65665     |
| Tns3      | Tns3-004      | 0.0109269   | 19.7449     | 19.7449      |
| Toe1      | Toe1-003      | 0.007289    | 2.76945e-08 | -3.61082e+07 |
| Tom1      | Tom1-202      | 0.0499044   | 1.16961     | 1.16961      |
| Tom1      | Tom1-201      | 0.0350508   | 4.07539     | 4.07539      |
| Tom1l1    | Tom1l1-002    | 0.000473262 | 1.47529     | 1.47529      |
| Tom1l1    | Tom1l1-008    | 0.000280923 | 1.79645     | 1.79645      |
| Tomm34    | Tomm34-001    | 0.00473305  | 0.870393    | -1.14891     |
| Tomm40l   | Tomm40l-008   | 0.0406432   | 0.046636    | -21.4427     |
| Tomm6     | Tomm6-002     | 0.0102087   | 1.31497     | 1.31497      |
| Top2a     | Top2a-007     | 7.97413e-06 | 0.466403    | -2.14407     |
| Top2a     | Top2a-001     | 0.0398851   | 0.866186    | -1.15449     |

|          |              |             |           |          |
|----------|--------------|-------------|-----------|----------|
| Top2b    | Top2b-003    | 0.0332997   | 0.0961018 | -10.4056 |
| Topbp1   | Topbp1-010   | 0.0369609   | 0.577421  | -1.73184 |
| Topbp1   | Topbp1-001   | 0.0310836   | 0.726245  | -1.37695 |
| Tor3a    | Tor3a-001    | 0.0396806   | 0.801932  | -1.24699 |
| Tor4a    | Tor4a-001    | 0.0180043   | 0.481189  | -2.07819 |
| Tpcn1    | Tpcn1-004    | 0.0106971   | 0.47162   | -2.12035 |
| Tpd52l2  | Tpd52l2-002  | 0.0479206   | 0.638359  | -1.56652 |
| Tph1     | Tph1-001     | 0.0100815   | 0.652488  | -1.53259 |
| Tpm1     | Tpm1-020     | 0.0426864   | 4.88363   | 4.88363  |
| Tpm2     | Tpm2-201     | 0.00730428  | 0.795309  | -1.25737 |
| Tpm3     | Tpm3-002     | 0.03499     | 0.388017  | -2.5772  |
| Tpm4     | Tpm4-001     | 0.000263707 | 0.584864  | -1.7098  |
| Tpp1     | Tpp1-201     | 0.000968549 | 0.869196  | -1.15049 |
| Tpp2     | Tpp2-009     | 0.0114839   | 2.90329   | 2.90329  |
| Tpr      | Tpr-003      | 0.0331388   | 0.728573  | -1.37255 |
| Tpra1    | Tpra1-017    | 0.00362523  | 0.632947  | -1.57991 |
| Tprgl    | Tprgl-001    | 0.00968496  | 0.754659  | -1.3251  |
| Tprkb    | Tprkb-003    | 0.00186186  | 1.498     | 1.498    |
| Tprkb    | Tprkb-002    | 0.0122646   | 1.85577   | 1.85577  |
| Tpst2    | Tpst2-002    | 0.0270282   | 1.85531   | 1.85531  |
| Tpt1     | Tpt1-003     | 0.0164052   | 0.382355  | -2.61537 |
| Tpx2     | Tpx2-002     | 0.0152784   | 1.24263   | 1.24263  |
| Tpx2     | Tpx2-001     | 0.0469207   | 1.3898    | 1.3898   |
| Trabd    | Trabd-001    | 0.0374261   | 0.817946  | -1.22257 |
| Trabd2b  | Trabd2b-001  | 0.0254975   | 0.233307  | -4.2862  |
| Tradd    | Tradd-001    | 0.0218767   | 0.749169  | -1.33481 |
| Traf3    | Traf3-004    | 0.0197466   | 10.1762   | 10.1762  |
| Traf3ip2 | Traf3ip2-002 | 0.00562865  | 0.337561  | -2.96242 |
| Traf3ip2 | Traf3ip2-001 | 0.0348043   | 0.791032  | -1.26417 |
| Traf4    | Traf4-002    | 0.0118674   | 0.417688  | -2.39413 |
| Traf4    | Traf4-001    | 0.00055105  | 0.597431  | -1.67383 |
| Trak1    | Trak1-201    | 0.00401972  | 0.715891  | -1.39686 |
| Tram1    | Tram1-001    | 0.032384    | 1.14053   | 1.14053  |
| Trappc12 | Trappc12-201 | 0.0412468   | 1.71213   | 1.71213  |
| Trappc13 | Trappc13-002 | 0.0299924   | 0.566626  | -1.76483 |
| Trappc2  | Trappc2-002  | 0.0467392   | 1.94061   | 1.94061  |
| Trappc2l | Trappc2l-201 | 0.0457593   | 0.808873  | -1.23629 |
| Trappc8  | Trappc8-201  | 0.0115583   | 1.23326   | 1.23326  |
| Trdmt1   | Trdmt1-001   | 0.00275572  | 1.60446   | 1.60446  |
| Trdmt1   | Trdmt1-003   | 0.000384833 | 2.01327   | 2.01327  |
| Trerf1   | Trerf1-001   | 0.00237673  | 0.48825   | -2.04813 |
| Trerf1   | Trerf1-005   | 0.0320012   | 2.5726    | 2.5726   |
| Trex1    | Trex1-001    | 0.0490109   | 0.314873  | -3.17588 |

|         |             |             |            |          |
|---------|-------------|-------------|------------|----------|
| Trib2   | Trib2-001   | 0.00124707  | 0.826541   | -1.20986 |
| Trib3   | Trib3-001   | 0.000771336 | 2.85465    | 2.85465  |
| Trib3   | Trib3-003   | 0.00729184  | 3.15751    | 3.15751  |
| Trim16  | Trim16-005  | 0.0422444   | 2.89093    | 2.89093  |
| Trim2   | Trim2-004   | 0.00132832  | 0.728539   | -1.37261 |
| Trim2   | Trim2-010   | 0.00142824  | 2.73147    | 2.73147  |
| Trim23  | Trim23-001  | 0.0161737   | 1.22018    | 1.22018  |
| Trim25  | Trim25-002  | 0.0228076   | 0.66072    | -1.5135  |
| Trim28  | Trim28-004  | 0.0426571   | 1.90167    | 1.90167  |
| Trim33  | Trim33-001  | 0.00800344  | 0.630912   | -1.58501 |
| Trim33  | Trim33-004  | 0.0285058   | 1.58658    | 1.58658  |
| Trim35  | Trim35-001  | 2.17831e-05 | 0.658124   | -1.51947 |
| Trim37  | Trim37-001  | 0.00184224  | 0.605539   | -1.65142 |
| Trim39  | Trim39-003  | 0.0137984   | 1.89612    | 1.89612  |
| Trim39  | Trim39-004  | 0.039742    | 2.76451    | 2.76451  |
| Trim41  | Trim41-001  | 0.00123097  | 1.15658    | 1.15658  |
| Trim46  | Trim46-003  | 0.00358663  | 1.73237    | 1.73237  |
| Trim47  | Trim47-006  | 0.00132831  | 0.00916725 | -109.084 |
| Trim47  | Trim47-002  | 0.0101692   | 0.529866   | -1.88727 |
| Trim47  | Trim47-001  | 0.0377337   | 0.705913   | -1.41661 |
| Trim59  | Trim59-005  | 0.00527218  | 0.30406    | -3.28882 |
| Trim62  | Trim62-002  | 0.0101007   | 0.357252   | -2.79915 |
| Trim62  | Trim62-001  | 5.06961e-05 | 0.565973   | -1.76687 |
| Trim66  | Trim66-004  | 4.62558e-05 | 6.91517    | 6.91517  |
| Trim66  | Trim66-003  | 0.00592616  | 9.29273    | 9.29273  |
| Trim66  | Trim66-002  | 0.00592544  | 9.29274    | 9.29274  |
| Trim67  | Trim67-201  | 0.000270633 | 0.41123    | -2.43173 |
| Trim7   | Trim7-001   | 0.0345445   | 2.02205    | 2.02205  |
| Trim71  | Trim71-001  | 0.0384166   | 0.785968   | -1.27232 |
| Trim80  | Trim80-001  | 0.0423103   | 2.6794     | 2.6794   |
| Trio    | Trio-201    | 0.0178578   | 1.12631    | 1.12631  |
| Triobp  | Triobp-005  | 0.0175374   | 0.769843   | -1.29897 |
| Triobp  | Triobp-201  | 0.0212588   | 0.801462   | -1.24772 |
| Trip10  | Trip10-201  | 0.000677108 | 0.621047   | -1.61018 |
| Trip12  | Trip12-201  | 0.00541587  | 0.534432   | -1.87115 |
| Trip12  | Trip12-001  | 0.00956864  | 0.548129   | -1.82439 |
| Trip4   | Trip4-002   | 0.0327246   | 1.35654    | 1.35654  |
| Trip6   | Trip6-001   | 0.0212457   | 0.683135   | -1.46384 |
| Trit1   | Trit1-001   | 0.0463067   | 1.55537    | 1.55537  |
| Trmt1   | Trmt1-030   | 0.0159545   | 2.3226     | 2.3226   |
| Trmt10b | Trmt10b-006 | 0.0301279   | 0.137877   | -7.25282 |
| Trmt10b | Trmt10b-002 | 0.0110433   | 1.7749     | 1.7749   |
| Trmt11  | Trmt11-201  | 0.0218174   | 1.48922    | 1.48922  |

|           |               |             |             |             |
|-----------|---------------|-------------|-------------|-------------|
| Trmt61b   | Trmt61b-003   | 0.0126902   | 1.84558     | 1.84558     |
| Trmt61b   | Trmt61b-001   | 0.0292091   | 2.67168     | 2.67168     |
| Trnau1ap  | Trnau1ap-012  | 0.0178583   | 14.1909     | 14.1909     |
| Trnp1     | Trnp1-001     | 0.0417288   | 0.749148    | -1.33485    |
| Trnp1     | Trnp1-002     | 0.00462808  | 1.9456      | 1.9456      |
| Tro       | Tro-001       | 0.00320362  | 1.19349     | 1.19349     |
| Trove2    | Trove2-001    | 0.0194519   | 0.707005    | -1.41442    |
| Trp53     | Trp53-003     | 0.036371    | 0.678236    | -1.47441    |
| Trp53bp1  | Trp53bp1-002  | 0.000419816 | 0.507963    | -1.96865    |
| Trp53bp1  | Trp53bp1-001  | 0.0170867   | 0.671567    | -1.48905    |
| Trp53cor1 | Trp53cor1-001 | 0.0057585   | 1.55531     | 1.55531     |
| Trp53i11  | Trp53i11-001  | 0.00850099  | 1.41414     | 1.41414     |
| Trp53i13  | Trp53i13-005  | 0.0491995   | 2.49745     | 2.49745     |
| Trp53inp2 | Trp53inp2-001 | 0.0010812   | 0.790218    | -1.26547    |
| Trpc3     | Trpc3-002     | 0.024947    | 1.27185e+10 | 1.27185e+10 |
| Trpc4     | Trpc4-002     | 0.0152745   | 4.09429     | 4.09429     |
| Trpm3     | Trpm3-204     | 0.0119348   | 0.236461    | -4.22902    |
| Trpm7     | Trpm7-010     | 0.0435267   | 0.00227027  | -440.476    |
| Trrap     | Trrap-004     | 0.00895547  | 0.669746    | -1.4931     |
| Trub1     | Trub1-202     | 0.00675211  | 0.429359    | -2.32905    |
| Trub1     | Trub1-201     | 0.00321505  | 0.643393    | -1.55426    |
| Trub2     | Trub2-004     | 0.0140042   | 3.34932     | 3.34932     |
| Tsc1      | Tsc1-004      | 0.0222701   | 2.12556     | 2.12556     |
| Tsc22d2   | Tsc22d2-002   | 0.0175337   | 1.31893     | 1.31893     |
| Tsc22d4   | Tsc22d4-002   | 0.0428468   | 0.78537     | -1.27329    |
| Tsc22d4   | Tsc22d4-001   | 0.0456769   | 1.28288     | 1.28288     |
| Tsen15    | Tsen15-001    | 0.0022067   | 1.45248     | 1.45248     |
| Tsen2     | Tsen2-001     | 0.00591165  | 1.3012      | 1.3012      |
| Tsen2     | Tsen2-005     | 0.0165071   | 2.20001     | 2.20001     |
| Tsks      | Tsks-202      | 0.0316187   | 0.335214    | -2.98317    |
| Tsks      | Tsks-201      | 0.0316188   | 0.335214    | -2.98317    |
| Tsku      | Tsku-003      | 0.0264207   | 0.262434    | -3.81048    |
| Tspan13   | Tspan13-001   | 0.00119584  | 1.14708     | 1.14708     |
| Tspan14   | Tspan14-201   | 0.00963523  | 0.687288    | -1.45499    |
| Tspan15   | Tspan15-201   | 0.000799412 | 1.52223     | 1.52223     |
| Tspan18   | Tspan18-001   | 0.00128112  | 0.580756    | -1.72189    |
| Tspan18   | Tspan18-004   | 0.0440885   | 0.647708    | -1.54391    |
| Tspan2    | Tspan2-001    | 0.0128613   | 0.805182    | -1.24196    |
| Tspan33   | Tspan33-003   | 0.0247851   | 16.6055     | 16.6055     |
| Tspan4    | Tspan4-001    | 0.0238393   | 0.622503    | -1.60642    |
| Tspan9    | Tspan9-011    | 0.0336102   | 0.000568201 | -1759.94    |
| Tspo      | Tspo-201      | 0.000181874 | 0.564963    | -1.77003    |
| Tspo2     | Tspo2-002     | 0.00195026  | 20.8405     | 20.8405     |

|           |               |             |           |          |
|-----------|---------------|-------------|-----------|----------|
| Tspyl2    | Tspyl2-001    | 0.012755    | 1.37304   | 1.37304  |
| Tspyl2    | Tspyl2-002    | 0.0351434   | 1.87237   | 1.87237  |
| Tspyl2    | Tspyl2-003    | 0.0499743   | 2.19915   | 2.19915  |
| Tspyl2    | Tspyl2-004    | 0.00475172  | 7.4677    | 7.4677   |
| Tspyl3    | Tspyl3-001    | 4.00342e-05 | 0.515192  | -1.94103 |
| Tspyl4    | Tspyl4-001    | 0.0315713   | 1.20039   | 1.20039  |
| Tsr1      | Tsr1-006      | 0.041291    | 3.87941   | 3.87941  |
| Tsr2      | Tsr2-002      | 0.00297434  | 1.35925   | 1.35925  |
| Tsr3      | Tsr3-201      | 0.0125364   | 1.19493   | 1.19493  |
| Tssc1     | Tssc1-201     | 0.00718965  | 1.2406    | 1.2406   |
| Tstd1     | Tstd1-001     | 0.0061958   | 0.336382  | -2.97281 |
| Tstd3     | Tstd3-001     | 0.000464171 | 1.25706   | 1.25706  |
| Ttbk2     | Ttbk2-005     | 0.035273    | 0.172727  | -5.78949 |
| Ttbk2     | Ttbk2-002     | 0.0376199   | 0.739513  | -1.35224 |
| Ttc1      | Ttc1-201      | 0.025903    | 1.30422   | 1.30422  |
| Ttc13     | Ttc13-007     | 0.0156249   | 0.655864  | -1.52471 |
| Ttc13     | Ttc13-004     | 0.012009    | 1.41943   | 1.41943  |
| Ttc16     | Ttc16-005     | 0.0386769   | 36.5219   | 36.5219  |
| Ttc17     | Ttc17-002     | 0.0113206   | 1.65875   | 1.65875  |
| Ttc19     | Ttc19-005     | 0.000382969 | 2.76003   | 2.76003  |
| Ttc19     | Ttc19-004     | 0.00444978  | 5.46414   | 5.46414  |
| Ttc21b    | Ttc21b-003    | 0.0356999   | 1.85547   | 1.85547  |
| Ttc23     | Ttc23-006     | 0.0058625   | 0.186511  | -5.36161 |
| Ttc23     | Ttc23-004     | 0.0430109   | 3.21999   | 3.21999  |
| Ttc25     | Ttc25-002     | 0.0431057   | 2.56811   | 2.56811  |
| Ttc26     | Ttc26-001     | 0.00437511  | 1.54989   | 1.54989  |
| Ttc3      | Ttc3-001      | 0.012411    | 1.29771   | 1.29771  |
| Ttc3      | Ttc3-005      | 0.0271829   | 1.43368   | 1.43368  |
| Ttc33     | Ttc33-004     | 0.0279448   | 100891    | 100891   |
| Ttc37     | Ttc37-201     | 0.0241375   | 1.23089   | 1.23089  |
| Ttc39a    | Ttc39a-002    | 0.00840059  | 0.477475  | -2.09435 |
| Ttc39aos1 | Ttc39aos1-002 | 0.0290435   | 0.357999  | -2.7933  |
| Ttc39b    | Ttc39b-002    | 0.000480256 | 3.84249   | 3.84249  |
| Ttc4      | Ttc4-001      | 0.0180154   | 1.26505   | 1.26505  |
| Ttc41     | Ttc41-201     | 0.0467755   | 0.0170468 | -58.6619 |
| Ttc7b     | Ttc7b-201     | 0.049258    | 0.905182  | -1.10475 |
| Ttc8      | Ttc8-006      | 0.038913    | 1.71742   | 1.71742  |
| Tti2      | Tti2-201      | 0.0148552   | 1.29922   | 1.29922  |
| Ttll1     | Ttll1-001     | 4.13231e-05 | 1.53576   | 1.53576  |
| Ttll13    | Ttll13-004    | 0.0451916   | 2.83505   | 2.83505  |
| Ttll5     | Ttll5-009     | 0.0308216   | 2.67597   | 2.67597  |
| Ttyh2     | Ttyh2-001     | 0.00136436  | 0.604486  | -1.6543  |
| Ttyh3     | Ttyh3-005     | 0.0157192   | 0.257914  | -3.87726 |

|         |             |             |          |          |
|---------|-------------|-------------|----------|----------|
| Ttyh3   | Ttyh3-001   | 0.000478018 | 0.396805 | -2.52013 |
| Ttyh3   | Ttyh3-002   | 0.000110873 | 0.41741  | -2.39573 |
| Ttyh3   | Ttyh3-004   | 0.0419672   | 0.661102 | -1.51263 |
| Tuba1a  | Tuba1a-001  | 0.00133701  | 0.748388 | -1.33621 |
| Tuba1a  | Tuba1a-002  | 0.0063181   | 1.51417  | 1.51417  |
| Tuba1b  | Tuba1b-002  | 0.026959    | 1.58592  | 1.58592  |
| Tubb2a  | Tubb2a-201  | 0.0186728   | 0.819921 | -1.21963 |
| Tubb2b  | Tubb2b-201  | 0.0496579   | 0.566048 | -1.76663 |
| Tubb3   | Tubb3-001   | 0.00011428  | 0.725926 | -1.37755 |
| Tubb6   | Tubb6-201   | 0.00188441  | 0.722151 | -1.38475 |
| Tubgcp4 | Tubgcp4-002 | 0.00423922  | 2.29554  | 2.29554  |
| Tulp4   | Tulp4-005   | 0.0273233   | 0.715571 | -1.39749 |
| Tulp4   | Tulp4-002   | 0.00769421  | 0.779495 | -1.28288 |
| Tvp23b  | Tvp23b-001  | 0.00760681  | 1.15741  | 1.15741  |
| Tvp23b  | Tvp23b-002  | 0.00437409  | 3.92526  | 3.92526  |
| Txlng   | Txlng-003   | 0.000665052 | 1.66311  | 1.66311  |
| Txn2    | Txn2-001    | 0.00919884  | 1.38147  | 1.38147  |
| Txndc11 | Txndc11-003 | 0.018833    | 1.41299  | 1.41299  |
| Txndc11 | Txndc11-007 | 0.0242367   | 27.332   | 27.332   |
| Txndc16 | Txndc16-001 | 0.0224928   | 1.36192  | 1.36192  |
| Txndc9  | Txndc9-007  | 0.0139378   | 1.34346  | 1.34346  |
| Txnl4a  | Txnl4a-002  | 0.0292045   | 2.00546  | 2.00546  |
| Txnrd3  | Txnrd3-001  | 0.00329829  | 0.789275 | -1.26699 |
| Tyk2    | Tyk2-201    | 0.0068823   | 0.627793 | -1.59288 |
| Tyms    | Tyms-003    | 0.00125706  | 0.552901 | -1.80864 |
| Tyro3   | Tyro3-002   | 0.00319903  | 0.652857 | -1.53173 |
| Tyw1    | Tyw1-002    | 0.0010633   | 1.60956  | 1.60956  |
| Tyw1    | Tyw1-201    | 0.0010633   | 1.60956  | 1.60956  |
| Tyw1    | Tyw1-003    | 0.0269919   | 2.41677  | 2.41677  |
| U2af1l4 | U2af1l4-022 | 0.0401466   | 1.88065  | 1.88065  |
| U2af1l4 | U2af1l4-009 | 0.0371103   | 8.6349   | 8.6349   |
| U2surp  | U2surp-004  | 0.0367565   | 0.410048 | -2.43874 |
| U2surp  | U2surp-002  | 0.000495707 | 0.67066  | -1.49107 |
| U2surp  | U2surp-009  | 0.00127074  | 1.69719  | 1.69719  |
| Uap1l1  | Uap1l1-006  | 0.0266033   | 2.92359  | 2.92359  |
| Uba3    | Uba3-004    | 0.000380639 | 1.89573  | 1.89573  |
| Uba5    | Uba5-004    | 0.00273111  | 1.37569  | 1.37569  |
| Uba52   | Uba52-004   | 0.0189671   | 1.54748  | 1.54748  |
| Uba52   | Uba52-003   | 0.00411093  | 1.60263  | 1.60263  |
| Uba6    | Uba6-001    | 0.0114797   | 0.841545 | -1.18829 |
| Uba6    | Uba6-003    | 0.00681521  | 1.86998  | 1.86998  |
| Uba7    | Uba7-007    | 0.0165201   | 0.115194 | -8.681   |
| Ubap1   | Ubap1-002   | 0.00421395  | 0.61027  | -1.63862 |

|         |             |             |          |          |
|---------|-------------|-------------|----------|----------|
| Ubap2l  | Ubap2l-023  | 0.00998185  | 0.289342 | -3.45612 |
| Ubap2l  | Ubap2l-006  | 0.00602522  | 0.440612 | -2.26957 |
| Ubap2l  | Ubap2l-003  | 0.00726214  | 1.38306  | 1.38306  |
| Ubash3b | Ubash3b-001 | 0.00977988  | 0.695753 | -1.43729 |
| Ubb     | Ubb-002     | 0.0321416   | 1.28407  | 1.28407  |
| Ubb     | Ubb-001     | 0.0103802   | 1.29545  | 1.29545  |
| Ubc     | Ubc-002     | 0.0117757   | 2.20056  | 2.20056  |
| Ube2b   | Ube2b-001   | 0.00385789  | 0.820047 | -1.21944 |
| Ube2c   | Ube2c-002   | 0.00359668  | 2.55297  | 2.55297  |
| Ube2d3  | Ube2d3-001  | 0.00230296  | 0.462908 | -2.16025 |
| Ube2d3  | Ube2d3-012  | 0.00167573  | 5.37441  | 5.37441  |
| Ube2e1  | Ube2e1-001  | 0.0146407   | 1.34277  | 1.34277  |
| Ube2e2  | Ube2e2-012  | 0.0146007   | 0.162701 | -6.14626 |
| Ube2g2  | Ube2g2-004  | 0.0341892   | 3.84447  | 3.84447  |
| Ube2h   | Ube2h-004   | 0.0395623   | 251.441  | 251.441  |
| Ube2i   | Ube2i-010   | 0.0432468   | 1.48791  | 1.48791  |
| Ube2k   | Ube2k-003   | 0.0385268   | 0.206461 | -4.84353 |
| Ube2k   | Ube2k-007   | 0.0436554   | 0.254443 | -3.93016 |
| Ube2k   | Ube2k-010   | 0.0154817   | 0.473965 | -2.10986 |
| Ube2k   | Ube2k-001   | 0.000233198 | 0.513529 | -1.94731 |
| Ube2k   | Ube2k-004   | 0.0413396   | 1.28572  | 1.28572  |
| Ube2k   | Ube2k-002   | 0.0341735   | 1.41119  | 1.41119  |
| Ube2l3  | Ube2l3-003  | 0.0108461   | 1.35753  | 1.35753  |
| Ube2l6  | Ube2l6-001  | 0.00126801  | 0.749191 | -1.33477 |
| Ube2m   | Ube2m-003   | 0.0437846   | 1.38244  | 1.38244  |
| Ube2o   | Ube2o-001   | 0.000674016 | 1.3189   | 1.3189   |
| Ube2q1  | Ube2q1-002  | 0.000197931 | 1.25866  | 1.25866  |
| Ube2r2  | Ube2r2-003  | 0.000166784 | 0.645249 | -1.54979 |
| Ube2r2  | Ube2r2-001  | 0.000474457 | 0.670543 | -1.49133 |
| Ube2v1  | Ube2v1-001  | 0.0129317   | 1.55426  | 1.55426  |
| Ube2v2  | Ube2v2-001  | 0.0117411   | 0.744584 | -1.34303 |
| Ube2w   | Ube2w-001   | 6.97744e-05 | 1.49938  | 1.49938  |
| Ube2w   | Ube2w-006   | 0.00216206  | 2.3584   | 2.3584   |
| Ube3b   | Ube3b-001   | 0.0348326   | 1.187    | 1.187    |
| Ube3b   | Ube3b-004   | 0.0480259   | 2816.12  | 2816.12  |
| Ube4b   | Ube4b-009   | 0.0147403   | 5.2963   | 5.2963   |
| Ubfd1   | Ubfd1-002   | 0.00319645  | 1.56288  | 1.56288  |
| Ubfd1   | Ubfd1-005   | 0.0196372   | 2.03876  | 2.03876  |
| Ubfd1   | Ubfd1-004   | 0.0202864   | 8.77086  | 8.77086  |
| Ubl3    | Ubl3-201    | 0.0385036   | 2.01465  | 2.01465  |
| Ubl5    | Ubl5-007    | 0.0188151   | 3.12139  | 3.12139  |
| Ubl7    | Ubl7-201    | 0.00254883  | 1.26963  | 1.26963  |
| Ubn2    | Ubn2-001    | 0.00947472  | 0.826661 | -1.20969 |

|         |             |             |           |          |
|---------|-------------|-------------|-----------|----------|
| Ubox5   | Ubox5-001   | 0.0334351   | 1.52288   | 1.52288  |
| Ubqln1  | Ubqln1-201  | 0.00214162  | 1.36168   | 1.36168  |
| Ubr2    | Ubr2-202    | 0.00256287  | 1.43329   | 1.43329  |
| Ubr3    | Ubr3-201    | 0.0148229   | 1.4852    | 1.4852   |
| Ubtf    | Ubtf-201    | 0.0410806   | 0.525547  | -1.90278 |
| Ubtfl1  | Ubtfl1-001  | 0.00115679  | 0.296714  | -3.37025 |
| Ubtfl1  | Ubtfl1-002  | 0.0011568   | 0.296714  | -3.37025 |
| Ubxn4   | Ubxn4-001   | 0.0290974   | 1.10053   | 1.10053  |
| Ubxn4   | Ubxn4-004   | 0.0311094   | 2.2468    | 2.2468   |
| Ubxn4   | Ubxn4-003   | 0.02188     | 2.25263   | 2.25263  |
| Uchl1os | Uchl1os-001 | 0.0243193   | 2.90161   | 2.90161  |
| Uck2    | Uck2-008    | 0.00177247  | 1.82009   | 1.82009  |
| Uck2    | Uck2-002    | 0.00157431  | 1.93447   | 1.93447  |
| Uck2    | Uck2-009    | 0.00025645  | 1.9914    | 1.9914   |
| Uckl1   | Uckl1-017   | 0.0389982   | 0.158428  | -6.31201 |
| Uckl1   | Uckl1-009   | 0.0338018   | 0.435517  | -2.29612 |
| Uckl1   | Uckl1-012   | 0.00179423  | 0.497492  | -2.01008 |
| Uckl1   | Uckl1-001   | 0.0467944   | 0.573961  | -1.74228 |
| Ucp2    | Ucp2-002    | 0.0441005   | 0.410468  | -2.43625 |
| Ufc1    | Ufc1-005    | 0.0298872   | 1.59448   | 1.59448  |
| Ufc1    | Ufc1-004    | 0.0083991   | 2.07163   | 2.07163  |
| Ufl1    | Ufl1-003    | 0.0476569   | 1.33022   | 1.33022  |
| Ufsp2   | Ufsp2-001   | 0.00851785  | 1.41666   | 1.41666  |
| Ugdh    | Ugdh-004    | 0.028297    | 0.797728  | -1.25356 |
| Uggt1   | Uggt1-002   | 0.00109668  | 1.89022   | 1.89022  |
| Uggt1   | Uggt1-007   | 0.00042299  | 7.00865   | 7.00865  |
| Uhrf1   | Uhrf1-001   | 0.0165628   | 0.582852  | -1.7157  |
| Uhrf1   | Uhrf1-007   | 0.00968302  | 0.622404  | -1.60667 |
| Uhrf2   | Uhrf2-003   | 0.0395491   | 1.45351   | 1.45351  |
| Ulbp1   | Ulbp1-202   | 0.0104582   | 0.26921   | -3.71457 |
| Umad1   | Umad1-005   | 0.0466945   | 0.56727   | -1.76283 |
| Unc119  | Unc119-005  | 0.0186482   | 0.0915918 | -10.918  |
| Unc119b | Unc119b-001 | 0.0148292   | 1.2097    | 1.2097   |
| Unc119b | Unc119b-002 | 0.0244531   | 1.93055   | 1.93055  |
| Unc13a  | Unc13a-001  | 2.08996e-05 | 0.616978  | -1.6208  |
| Unc13a  | Unc13a-006  | 0.00206156  | 0.692344  | -1.44437 |
| Unc13b  | Unc13b-013  | 0.00817966  | 4.95456   | 4.95456  |
| Unc45a  | Unc45a-007  | 0.0493384   | 2.7247    | 2.7247   |
| Unc50   | Unc50-004   | 0.0155739   | 2.00759   | 2.00759  |
| Unc5c   | Unc5c-001   | 0.0125929   | 0.717563  | -1.39361 |
| Unc80   | Unc80-001   | 0.0273298   | 1.13021   | 1.13021  |
| Unc80   | Unc80-004   | 0.00143103  | 2.91189   | 2.91189  |
| Unc93b1 | Unc93b1-003 | 0.00967924  | 0.507162  | -1.97176 |



|        |            |             |             |              |
|--------|------------|-------------|-------------|--------------|
| Upf3a  | Upf3a-201  | 0.00859198  | 1.22028     | 1.22028      |
| Uqcc1  | Uqcc1-001  | 0.0276636   | 0.474811    | -2.1061      |
| Uqcc1  | Uqcc1-011  | 0.000520164 | 5.55838     | 5.55838      |
| Uqcc2  | Uqcc2-001  | 0.0031701   | 1.23567     | 1.23567      |
| Uqcrb  | Uqcrb-001  | 0.00244896  | 1.34091     | 1.34091      |
| Uqcrc2 | Uqcrc2-001 | 0.0309833   | 1.08934     | 1.08934      |
| Uqcrc2 | Uqcrc2-003 | 0.0474656   | 8.24575     | 8.24575      |
| Uri1   | Uri1-003   | 0.0172922   | 1.47466     | 1.47466      |
| Urm1   | Urm1-001   | 0.0267174   | 1.34805     | 1.34805      |
| Urm1   | Urm1-002   | 0.00523015  | 2.50951     | 2.50951      |
| Urod   | Urod-001   | 0.0184336   | 0.637399    | -1.56888     |
| Uros   | Uros-004   | 0.0218402   | 1.58086     | 1.58086      |
| Usb1   | Usb1-004   | 0.0300601   | 0.3226      | -3.09981     |
| Usb1   | Usb1-001   | 0.00768631  | 1.30808     | 1.30808      |
| Ushbp1 | Ushbp1-201 | 0.0353727   | 0.60259     | -1.6595      |
| Uso1   | Uso1-001   | 0.00132888  | 1.34978     | 1.34978      |
| Uso1   | Uso1-004   | 0.00527942  | 1.88101     | 1.88101      |
| Uso1   | Uso1-002   | 0.00347796  | 2.89873     | 2.89873      |
| Usp10  | Usp10-004  | 0.0215726   | 1.46572     | 1.46572      |
| Usp15  | Usp15-201  | 0.0499207   | 1.21637     | 1.21637      |
| Usp21  | Usp21-008  | 0.0461865   | 0.205921    | -4.85623     |
| Usp21  | Usp21-010  | 0.0121922   | 1.46427     | 1.46427      |
| Usp3   | Usp3-010   | 0.0282859   | 0.215465    | -4.64113     |
| Usp3   | Usp3-003   | 0.0325773   | 0.834572    | -1.19822     |
| Usp34  | Usp34-004  | 0.048777    | 1.33897e-08 | -7.46843e+07 |
| Usp34  | Usp34-003  | 0.0258451   | 0.330101    | -3.02938     |
| Usp36  | Usp36-005  | 0.0144703   | 1.6343      | 1.6343       |
| Usp36  | Usp36-003  | 0.0104278   | 1.83225     | 1.83225      |
| Usp37  | Usp37-001  | 0.00234688  | 3.13298     | 3.13298      |
| Usp4   | Usp4-001   | 0.026401    | 1.26698     | 1.26698      |
| Usp40  | Usp40-003  | 0.00955196  | 1.3976      | 1.3976       |
| Usp40  | Usp40-008  | 0.0484858   | 2.61308     | 2.61308      |
| Usp43  | Usp43-004  | 0.00636171  | 0.394912    | -2.53221     |
| Usp45  | Usp45-007  | 0.0135688   | 66.4619     | 66.4619      |
| Usp46  | Usp46-004  | 0.0313767   | 0.0702283   | -14.2393     |
| Usp48  | Usp48-017  | 0.00218033  | 0.260541    | -3.83817     |
| Usp48  | Usp48-010  | 0.0396063   | 1.6434      | 1.6434       |
| Usp48  | Usp48-003  | 0.00789475  | 2.66818     | 2.66818      |
| Usp49  | Usp49-001  | 0.0321021   | 0.761642    | -1.31295     |
| Usp49  | Usp49-004  | 0.00808928  | 56.581      | 56.581       |
| Usp53  | Usp53-001  | 0.00774041  | 1.15876     | 1.15876      |
| Usp7   | Usp7-001   | 0.0292123   | 1.62295     | 1.62295      |
| Usp8   | Usp8-002   | 0.049944    | 1.27376     | 1.27376      |

|            |                |             |             |              |
|------------|----------------|-------------|-------------|--------------|
| Uspl1      | Uspl1-007      | 0.0134484   | 0.333744    | -2.9963      |
| Uspl1      | Uspl1-005      | 0.0021623   | 1.6094      | 1.6094       |
| Utp11l     | Utp11l-002     | 0.0349495   | 1.29999     | 1.29999      |
| Utp6       | Utp6-002       | 0.00117602  | 11.5433     | 11.5433      |
| Uvrag      | Uvrag-201      | 0.000260599 | 1.34801     | 1.34801      |
| Uxs1       | Uxs1-001       | 0.00372249  | 0.605053    | -1.65275     |
| Vamp2      | Vamp2-004      | 0.0469937   | 0.492963    | -2.02855     |
| Vamp2      | Vamp2-001      | 0.0184483   | 1.15325     | 1.15325      |
| Vamp3      | Vamp3-001      | 0.00583896  | 0.92875     | -1.07672     |
| Vamp4      | Vamp4-002      | 0.00430959  | 1.26292     | 1.26292      |
| Vamp5      | Vamp5-002      | 0.000616481 | 0.314215    | -3.18253     |
| Vamp7-ps   | Vamp7-ps-001   | 0.0470094   | 1.32953     | 1.32953      |
| Vamp8      | Vamp8-001      | 0.00383961  | 0.71365     | -1.40125     |
| Vangl2     | Vangl2-001     | 0.00195467  | 0.751588    | -1.33052     |
| Vangl2     | Vangl2-002     | 0.00358222  | 6.66668     | 6.66668      |
| Vapa       | Vapa-201       | 0.00307953  | 1.16644     | 1.16644      |
| Vapb       | Vapb-002       | 0.0114355   | 1.31082     | 1.31082      |
| Vars       | Vars-010       | 0.0170114   | 2.66809     | 2.66809      |
| Vars2      | Vars2-012      | 0.0295941   | 613606      | 613606       |
| Vat1       | Vat1-001       | 0.00530728  | 0.761602    | -1.31302     |
| Vat1l      | Vat1l-004      | 0.0264357   | 0.66433     | -1.50528     |
| Vat1l      | Vat1l-001      | 0.0065619   | 0.767228    | -1.30339     |
| Vcan       | Vcan-001       | 0.00958152  | 0.355044    | -2.81655     |
| Vcan       | Vcan-004       | 0.00887541  | 0.457583    | -2.1854      |
| Vcl        | Vcl-201        | 0.0406816   | 0.807243    | -1.23878     |
| Vcpkmt     | Vcpkmt-201     | 0.00581084  | 1.22033     | 1.22033      |
| Vdac2      | Vdac2-006      | 0.0229237   | 0.350745    | -2.85108     |
| Vdac2      | Vdac2-007      | 0.00507957  | 0.692783    | -1.44345     |
| Vdac3      | Vdac3-202      | 0.00161437  | 1.20462     | 1.20462      |
| Vdac3      | Vdac3-201      | 0.000175116 | 1.41975     | 1.41975      |
| Vdr        | Vdr-001        | 1.14582e-06 | 0.540244    | -1.85102     |
| VeZF1      | VeZF1-002      | 0.0167402   | 0.51358     | -1.94712     |
| Vgf        | Vgf-003        | 0.0451497   | 0.533298    | -1.87512     |
| Vgll4      | Vgll4-004      | 0.033189    | 7.78638e-08 | -1.28429e+07 |
| Vgll4      | Vgll4-007      | 0.00782997  | 0.180413    | -5.54283     |
| Vgll4      | Vgll4-001      | 0.0222843   | 0.658132    | -1.51945     |
| Vgll4      | Vgll4-002      | 0.00727717  | 0.790512    | -1.265       |
| Vim        | Vim-001        | 0.00299197  | 0.478952    | -2.08789     |
| Vim        | Vim-004        | 0.00200812  | 0.484569    | -2.06369     |
| Vim        | Vim-006        | 0.0013928   | 0.490024    | -2.04072     |
| Vim        | Vim-005        | 0.0332695   | 0.541787    | -1.84574     |
| Vmn1r-ps60 | Vmn1r-ps60-001 | 0.0458406   | 0.695816    | -1.43716     |
| Vmn2r46    | Vmn2r46-001    | 0.0187369   | 0.282117    | -3.54462     |

|        |            |             |             |              |
|--------|------------|-------------|-------------|--------------|
| Vmp1   | Vmp1-001   | 0.0444507   | 1.1611      | 1.1611       |
| Vps11  | Vps11-201  | 0.00685227  | 1.18042     | 1.18042      |
| Vps13a | Vps13a-201 | 0.0102664   | 0.777321    | -1.28647     |
| Vps13c | Vps13c-201 | 0.0382654   | 1.15944     | 1.15944      |
| Vps16  | Vps16-001  | 0.000276524 | 0.699909    | -1.42876     |
| Vps16  | Vps16-003  | 0.00793567  | 1.6825      | 1.6825       |
| Vps26a | Vps26a-202 | 0.0104819   | 1.13963     | 1.13963      |
| Vps26b | Vps26b-201 | 0.00691608  | 1.215       | 1.215        |
| Vps29  | Vps29-001  | 0.00300381  | 0.508704    | -1.96578     |
| Vps29  | Vps29-009  | 0.0352      | 0.783312    | -1.27663     |
| Vps33b | Vps33b-001 | 0.0408782   | 0.750995    | -1.33157     |
| Vps35  | Vps35-201  | 7.48641e-05 | 1.15501     | 1.15501      |
| Vps36  | Vps36-001  | 0.00569586  | 1.30975     | 1.30975      |
| Vps39  | Vps39-009  | 0.0345509   | 3.04814     | 3.04814      |
| Vps4a  | Vps4a-001  | 0.000945795 | 1.23113     | 1.23113      |
| Vps4b  | Vps4b-002  | 0.00114801  | 0.457522    | -2.18568     |
| Vps4b  | Vps4b-001  | 0.00515045  | 1.11787     | 1.11787      |
| Vps51  | Vps51-008  | 0.0469343   | 0.229332    | -4.3605      |
| Vps51  | Vps51-004  | 0.00102488  | 2.35436     | 2.35436      |
| Vps52  | Vps52-003  | 0.0183015   | 0.410647    | -2.43518     |
| Vps8   | Vps8-003   | 3.80953e-05 | 1.63884e-11 | -6.10186e+10 |
| Vrk3   | Vrk3-001   | 0.0128034   | 0.654707    | -1.5274      |
| Vrk3   | Vrk3-004   | 0.0370007   | 4.85233     | 4.85233      |
| Vsig1  | Vsig1-002  | 0.0340401   | 1.94617     | 1.94617      |
| Vta1   | Vta1-006   | 0.00839817  | 1.3032      | 1.3032       |
| Vwa3a  | Vwa3a-201  | 0.0312784   | 0.046989    | -21.2816     |
| Vwa3a  | Vwa3a-001  | 0.0312785   | 0.046989    | -21.2816     |
| Vwa3a  | Vwa3a-002  | 0.0312785   | 0.0469889   | -21.2816     |
| Vwa5b2 | Vwa5b2-201 | 0.0415557   | 0.654686    | -1.52745     |
| Vwa5b2 | Vwa5b2-005 | 0.0455542   | 1.88692     | 1.88692      |
| Vwa5b2 | Vwa5b2-008 | 0.0298422   | 3.75396     | 3.75396      |
| Vwa7   | Vwa7-001   | 0.00268913  | 0.610273    | -1.63861     |
| Vwa9   | Vwa9-201   | 0.0318711   | 2.34641     | 2.34641      |
| Vwf    | Vwf-008    | 0.0239585   | 2.27725     | 2.27725      |
| Wac    | Wac-005    | 0.00512101  | 1.23309     | 1.23309      |
| Wac    | Wac-008    | 0.00226535  | 2.27958     | 2.27958      |
| Wac    | Wac-012    | 0.00249251  | 2.54749     | 2.54749      |
| Wac    | Wac-015    | 0.0147447   | 13.5535     | 13.5535      |
| Wapl   | Wapl-001   | 0.0199833   | 0.764871    | -1.30741     |
| Wapl   | Wapl-201   | 0.00872796  | 2.05648     | 2.05648      |
| Wapl   | Wapl-003   | 0.0227805   | 2.12989     | 2.12989      |
| Wars   | Wars-001   | 2.51164e-05 | 1.60241     | 1.60241      |
| Wars   | Wars-007   | 0.0371607   | 1.77641     | 1.77641      |

|         |             |             |          |          |
|---------|-------------|-------------|----------|----------|
| Wars    | Wars-003    | 0.00127067  | 1.79847  | 1.79847  |
| Wasf1   | Wasf1-002   | 0.0184409   | 1.24101  | 1.24101  |
| Wasf3   | Wasf3-001   | 3.14482e-05 | 1.35597  | 1.35597  |
| Wasl    | Wasl-001    | 0.00716251  | 1.19185  | 1.19185  |
| Wbp1    | Wbp1-007    | 0.0432904   | 0.580035 | -1.72404 |
| Wbp1    | Wbp1-005    | 0.0019584   | 10.7923  | 10.7923  |
| Wbp11   | Wbp11-001   | 0.0294173   | 1.29628  | 1.29628  |
| Wbp1l   | Wbp1l-002   | 0.0488751   | 0.667098 | -1.49903 |
| Wbp2    | Wbp2-001    | 0.0314817   | 1.33314  | 1.33314  |
| Wbp5    | Wbp5-001    | 0.0032831   | 1.32678  | 1.32678  |
| Wdfy1   | Wdfy1-008   | 0.0136484   | 0.306245 | -3.26536 |
| Wdfy1   | Wdfy1-009   | 0.0163317   | 0.417514 | -2.39513 |
| Wdfy1   | Wdfy1-002   | 0.0170089   | 1.82191  | 1.82191  |
| Wdfy1   | Wdfy1-013   | 0.015842    | 12.2095  | 12.2095  |
| Wdr1    | Wdr1-001    | 0.00166004  | 0.647929 | -1.54338 |
| Wdr11   | Wdr11-001   | 0.0278732   | 1.14443  | 1.14443  |
| Wdr17   | Wdr17-002   | 0.0127701   | 2.14336  | 2.14336  |
| Wdr17   | Wdr17-004   | 0.0233577   | 2.23278  | 2.23278  |
| Wdr19   | Wdr19-001   | 0.0139753   | 0.727114 | -1.3753  |
| Wdr20   | Wdr20-002   | 0.0269723   | 1.18414  | 1.18414  |
| Wdr26   | Wdr26-002   | 0.00287137  | 0.647047 | -1.54548 |
| Wdr26   | Wdr26-003   | 0.0363387   | 1.34582  | 1.34582  |
| Wdr38   | Wdr38-003   | 0.0299049   | 2.28268  | 2.28268  |
| Wdr41   | Wdr41-201   | 0.0117287   | 1.34174  | 1.34174  |
| Wdr45   | Wdr45-008   | 0.0337349   | 29121.5  | 29121.5  |
| Wdr45b  | Wdr45b-001  | 0.00542247  | 1.18078  | 1.18078  |
| Wdr5    | Wdr5-001    | 0.0264724   | 1.14212  | 1.14212  |
| Wdr53   | Wdr53-001   | 0.0315627   | 1.7215   | 1.7215   |
| Wdr53   | Wdr53-002   | 0.0166014   | 4.33143  | 4.33143  |
| Wdr5b   | Wdr5b-201   | 0.0479639   | 1.66254  | 1.66254  |
| Wdr60   | Wdr60-201   | 0.0225116   | 1.60506  | 1.60506  |
| Wdr61   | Wdr61-001   | 0.0463098   | 1.33079  | 1.33079  |
| Wdr70   | Wdr70-201   | 0.00253644  | 1.2801   | 1.2801   |
| Wdr76   | Wdr76-005   | 0.0330594   | 15.6303  | 15.6303  |
| Wdr77   | Wdr77-002   | 0.0284772   | 0.758197 | -1.31892 |
| Wdr77   | Wdr77-003   | 0.0364913   | 2.16677  | 2.16677  |
| Wdr83   | Wdr83-001   | 0.00223233  | 0.644816 | -1.55083 |
| Wdr83   | Wdr83-003   | 0.0340285   | 2.29176  | 2.29176  |
| Wdr90   | Wdr90-004   | 0.0490367   | 1.50865  | 1.50865  |
| Wdr90   | Wdr90-011   | 0.0376387   | 2.0721   | 2.0721   |
| Wdr90   | Wdr90-005   | 0.00890461  | 3.77053  | 3.77053  |
| Wdr92   | Wdr92-002   | 0.0375248   | 2.28963  | 2.28963  |
| Wfikkn2 | Wfikkn2-001 | 0.0124459   | 1.67105  | 1.67105  |

|         |             |             |           |          |
|---------|-------------|-------------|-----------|----------|
| Wfs1    | Wfs1-001    | 0.007977    | 1.51321   | 1.51321  |
| Whamm   | Whamm-201   | 0.0429413   | 1.24497   | 1.24497  |
| Whsc1   | Whsc1-006   | 0.0102398   | 0.309056  | -3.23566 |
| Whsc1   | Whsc1-007   | 0.0119343   | 0.322738  | -3.09848 |
| Whsc1   | Whsc1-201   | 0.00602922  | 0.391686  | -2.55306 |
| Whsc1   | Whsc1-005   | 0.0186292   | 0.65245   | -1.53268 |
| Whsc1   | Whsc1-003   | 0.00921604  | 1.49017   | 1.49017  |
| Whsc1   | Whsc1-002   | 0.00151763  | 1.52556   | 1.52556  |
| Whsc1l1 | Whsc1l1-201 | 0.00463695  | 0.727881  | -1.37385 |
| Whsc1l1 | Whsc1l1-005 | 0.00174181  | 0.743128  | -1.34566 |
| Whsc1l1 | Whsc1l1-006 | 0.0198575   | 2.13529   | 2.13529  |
| Wipf3   | Wipf3-202   | 0.00552978  | 0.610693  | -1.63748 |
| Wipi2   | Wipi2-003   | 0.000112304 | 1.57638   | 1.57638  |
| Wipi2   | Wipi2-005   | 0.0189914   | 2.10665   | 2.10665  |
| Wisp2   | Wisp2-001   | 0.0131096   | 7.47655   | 7.47655  |
| Wiz     | Wiz-007     | 0.0137125   | 1.47282   | 1.47282  |
| Wnk1    | Wnk1-016    | 0.0166409   | 0.398968  | -2.50647 |
| Wnk1    | Wnk1-002    | 0.0247838   | 0.483042  | -2.07021 |
| Wnk1    | Wnk1-015    | 0.0271943   | 0.509797  | -1.96157 |
| Wnk1    | Wnk1-023    | 0.0423818   | 0.722593  | -1.38391 |
| Wnk1    | Wnk1-022    | 0.0354232   | 0.802893  | -1.2455  |
| Wnk1    | Wnk1-021    | 0.0227983   | 0.853688  | -1.17139 |
| Wnt3    | Wnt3-001    | 0.0299219   | 1.51304   | 1.51304  |
| Wnt9a   | Wnt9a-001   | 0.030409    | 2.51593   | 2.51593  |
| Wrb     | Wrb-002     | 0.0350288   | 0.368436  | -2.71417 |
| Wrb     | Wrb-001     | 0.005982    | 0.437076  | -2.28793 |
| Wrn     | Wrn-202     | 0.00206728  | 0.686611  | -1.45643 |
| Wrnip1  | Wrnip1-001  | 0.0126102   | 1.06837   | 1.06837  |
| Wsb1    | Wsb1-003    | 0.0489834   | 0.497126  | -2.01156 |
| Wtap    | Wtap-005    | 0.0100647   | 0.0864794 | -11.5634 |
| Wwox    | Wwox-003    | 0.048575    | 6.73357   | 6.73357  |
| Wwp1    | Wwp1-201    | 0.0323841   | 1.42933   | 1.42933  |
| Xbp1    | Xbp1-001    | 0.0284623   | 1.3312    | 1.3312   |
| Xiap    | Xiap-005    | 0.00900318  | 0.752779  | -1.32841 |
| Xkr6    | Xkr6-002    | 0.0379857   | 5.42969   | 5.42969  |
| Xkr8    | Xkr8-001    | 0.025825    | 1.18313   | 1.18313  |
| Xkr8    | Xkr8-002    | 0.00607688  | 6.89092   | 6.89092  |
| Xlr3a   | Xlr3a-002   | 0.000810653 | 1.47658   | 1.47658  |
| Xlr3c   | Xlr3c-001   | 3.54087e-05 | 1.40985   | 1.40985  |
| Xlr4a   | Xlr4a-002   | 0.0460399   | 2.15252   | 2.15252  |
| Xlr4b   | Xlr4b-002   | 0.0150975   | 1.35894   | 1.35894  |
| Xndc1   | Xndc1-006   | 0.00476899  | 4.93134   | 4.93134  |
| Xpnpep1 | Xpnpep1-002 | 0.0390778   | 1.16914   | 1.16914  |

|          |              |             |          |          |
|----------|--------------|-------------|----------|----------|
| Xpo1     | Xpo1-202     | 0.048412    | 0.661609 | -1.51147 |
| Xpo4     | Xpo4-002     | 0.0290305   | 4.98192  | 4.98192  |
| Xpo6     | Xpo6-005     | 0.0191573   | 0.322744 | -3.09843 |
| Xpo6     | Xpo6-012     | 0.0492628   | 1.80669  | 1.80669  |
| Xpo6     | Xpo6-011     | 0.013843    | 5.1786   | 5.1786   |
| Xpo7     | Xpo7-201     | 0.0351261   | 1.25579  | 1.25579  |
| Xpot     | Xpot-201     | 0.018256    | 1.34095  | 1.34095  |
| Xpr1     | Xpr1-001     | 0.000872811 | 0.586723 | -1.70438 |
| Xrcc6    | Xrcc6-001    | 0.00462554  | 1.31832  | 1.31832  |
| Xrcc6bp1 | Xrcc6bp1-201 | 0.0406473   | 0.49686  | -2.01264 |
| Xrcc6bp1 | Xrcc6bp1-202 | 0.0339819   | 1.58142  | 1.58142  |
| Xrn2     | Xrn2-001     | 0.0161856   | 1.11689  | 1.11689  |
| Xrra1    | Xrra1-201    | 0.000763645 | 2.26631  | 2.26631  |
| Xylb     | Xylb-201     | 0.0497953   | 1.67047  | 1.67047  |
| Xylt2    | Xylt2-001    | 0.0478795   | 1.28201  | 1.28201  |
| Yars     | Yars-001     | 0.00043946  | 1.24742  | 1.24742  |
| Yars     | Yars-003     | 0.0182333   | 1.65753  | 1.65753  |
| Ybx3     | Ybx3-004     | 0.0292242   | 0.732895 | -1.36445 |
| Yipf3    | Yipf3-001    | 0.0236696   | 1.40459  | 1.40459  |
| Yipf3    | Yipf3-005    | 0.00189482  | 1.81183  | 1.81183  |
| Yipf5    | Yipf5-201    | 0.0486144   | 1.24323  | 1.24323  |
| Yjefn3   | Yjefn3-001   | 0.000215617 | 0.62187  | -1.60805 |
| Ylpm1    | Ylpm1-001    | 0.0284067   | 0.787813 | -1.26934 |
| Yme1l1   | Yme1l1-001   | 0.00339651  | 1.27966  | 1.27966  |
| Yod1     | Yod1-001     | 0.000345196 | 1.50476  | 1.50476  |
| Ythdc1   | Ythdc1-002   | 0.031839    | 1.83732  | 1.83732  |
| Ythdf1   | Ythdf1-002   | 0.0169691   | 6.27298  | 6.27298  |
| Ywhae    | Ywhae-001    | 0.0278654   | 1.08701  | 1.08701  |
| Ywhah    | Ywhah-001    | 0.00734342  | 0.892175 | -1.12086 |
| Ywhaq    | Ywhaq-002    | 0.0329298   | 0.637451 | -1.56875 |
| Ywhaz    | Ywhaz-002    | 0.0135712   | 1.08034  | 1.08034  |
| Zadh2    | Zadh2-201    | 0.0154366   | 0.730613 | -1.36871 |
| Zbtb11   | Zbtb11-001   | 0.0261203   | 1.23175  | 1.23175  |
| Zbtb20   | Zbtb20-014   | 0.00379706  | 0.245675 | -4.07042 |
| Zbtb24   | Zbtb24-201   | 0.0321985   | 0.861818 | -1.16034 |
| Zbtb34   | Zbtb34-002   | 0.0314973   | 4.22166  | 4.22166  |
| Zbtb37   | Zbtb37-004   | 0.0260319   | 39.2666  | 39.2666  |
| Zbtb38   | Zbtb38-201   | 0.00841852  | 0.568533 | -1.75891 |
| Zbtb4    | Zbtb4-005    | 0.0381312   | 0.109394 | -9.14128 |
| Zbtb44   | Zbtb44-202   | 0.0191789   | 1.41104  | 1.41104  |
| Zbtb46   | Zbtb46-001   | 0.00491132  | 0.646523 | -1.54673 |
| Zbtb46   | Zbtb46-002   | 0.00892011  | 1.5126   | 1.5126   |
| Zbtb48   | Zbtb48-007   | 0.0470058   | 3.75616  | 3.75616  |

|         |             |             |          |          |
|---------|-------------|-------------|----------|----------|
| Zbtb49  | Zbtb49-007  | 0.0155792   | 1.64761  | 1.64761  |
| Zbtb7a  | Zbtb7a-001  | 0.0210576   | 0.653859 | -1.52938 |
| Zbtb7c  | Zbtb7c-201  | 0.000514415 | 1.80274  | 1.80274  |
| Zc3h11a | Zc3h11a-006 | 0.0262988   | 0.668368 | -1.49618 |
| Zc3h11a | Zc3h11a-002 | 0.0133561   | 0.75493  | -1.32463 |
| Zc3h14  | Zc3h14-204  | 0.0348575   | 1.19221  | 1.19221  |
| Zc3h15  | Zc3h15-001  | 0.00969672  | 1.22912  | 1.22912  |
| Zc3h3   | Zc3h3-201   | 0.00160614  | 1.25902  | 1.25902  |
| Zc3h7a  | Zc3h7a-011  | 0.00650067  | 1.4688   | 1.4688   |
| Zc3h7a  | Zc3h7a-016  | 0.0472991   | 1.48417  | 1.48417  |
| Zc3h8   | Zc3h8-001   | 0.00302605  | 1.80082  | 1.80082  |
| Zc3hav1 | Zc3hav1-003 | 0.0011016   | 2.44834  | 2.44834  |
| Zc3hc1  | Zc3hc1-002  | 0.0210072   | 1.45737  | 1.45737  |
| Zc3hc1  | Zc3hc1-007  | 1.52968e-05 | 3.95815  | 3.95815  |
| Zcchc11 | Zcchc11-008 | 0.0342716   | 355159   | 355159   |
| Zcchc12 | Zcchc12-001 | 0.0161134   | 1.18018  | 1.18018  |
| Zcchc12 | Zcchc12-004 | 0.0148986   | 1.66075  | 1.66075  |
| Zcchc14 | Zcchc14-001 | 0.0304601   | 0.743691 | -1.34465 |
| Zcchc17 | Zcchc17-003 | 0.0204136   | 1.90958  | 1.90958  |
| Zcchc2  | Zcchc2-001  | 0.0377421   | 1.40331  | 1.40331  |
| Zcchc4  | Zcchc4-003  | 0.00489024  | 0.705433 | -1.41757 |
| Zcchc9  | Zcchc9-001  | 0.0127539   | 1.22529  | 1.22529  |
| Zcrb1   | Zcrb1-008   | 0.0277121   | 1.80032  | 1.80032  |
| Zcwpw1  | Zcwpw1-002  | 0.0408743   | 0.186353 | -5.36616 |
| Zdhhc12 | Zdhhc12-001 | 0.00439031  | 0.55272  | -1.80923 |
| Zdhhc13 | Zdhhc13-001 | 0.00117152  | 1.35362  | 1.35362  |
| Zdhhc17 | Zdhhc17-201 | 0.00964182  | 0.852765 | -1.17266 |
| Zdhhc18 | Zdhhc18-004 | 0.0456231   | 2.00648  | 2.00648  |
| Zdhhc2  | Zdhhc2-001  | 0.0256323   | 0.700111 | -1.42834 |
| Zdhhc2  | Zdhhc2-201  | 0.0199449   | 1.74549  | 1.74549  |
| Zdhhc20 | Zdhhc20-201 | 3.17096e-05 | 0.543068 | -1.84139 |
| Zdhhc21 | Zdhhc21-001 | 5.83623e-06 | 0.620007 | -1.61289 |
| Zdhhc23 | Zdhhc23-201 | 0.00616652  | 3.1817   | 3.1817   |
| Zdhhc3  | Zdhhc3-001  | 0.00363903  | 1.49352  | 1.49352  |
| Zdhhc3  | Zdhhc3-005  | 0.0451455   | 8.87977  | 8.87977  |
| Zdhhc7  | Zdhhc7-002  | 0.0442157   | 3.01937  | 3.01937  |
| Zeb1    | Zeb1-003    | 0.0120735   | 1.6088   | 1.6088   |
| Zeb2    | Zeb2-006    | 0.00817849  | 0.214789 | -4.65574 |
| Zeb2    | Zeb2-001    | 0.0434188   | 0.484074 | -2.0658  |
| Zeb2    | Zeb2-005    | 0.0307881   | 0.613091 | -1.63108 |
| Zfand4  | Zfand4-201  | 0.0480691   | 1.67014  | 1.67014  |
| Zfand5  | Zfand5-003  | 0.00177671  | 0.744827 | -1.34259 |
| Zfc3h1  | Zfc3h1-001  | 0.000870016 | 1.42273  | 1.42273  |

|           |               |             |          |          |
|-----------|---------------|-------------|----------|----------|
| Zfhx2     | Zfhx2-004     | 0.00580204  | 1.62206  | 1.62206  |
| Zfp106    | Zfp106-002    | 0.0431155   | 1.84983  | 1.84983  |
| Zfp106    | Zfp106-005    | 0.00279427  | 4.90209  | 4.90209  |
| Zfp106    | Zfp106-011    | 0.0063668   | 5.8526   | 5.8526   |
| Zfp119b   | Zfp119b-001   | 0.0242304   | 1.54126  | 1.54126  |
| Zfp131    | Zfp131-202    | 0.00526654  | 1.49855  | 1.49855  |
| Zfp133-ps | Zfp133-ps-003 | 0.00305399  | 1.66663  | 1.66663  |
| Zfp146    | Zfp146-001    | 0.0269897   | 1.30494  | 1.30494  |
| Zfp148    | Zfp148-202    | 0.00579235  | 0.723881 | -1.38144 |
| Zfp180    | Zfp180-003    | 0.0180394   | 1.70095  | 1.70095  |
| Zfp180    | Zfp180-005    | 0.00195568  | 1.94119  | 1.94119  |
| Zfp182    | Zfp182-004    | 0.0295697   | 0.396608 | -2.52138 |
| Zfp184    | Zfp184-004    | 0.0482827   | 1.6641   | 1.6641   |
| Zfp207    | Zfp207-003    | 0.0397386   | 0.900561 | -1.11042 |
| Zfp207    | Zfp207-001    | 0.0158116   | 1.61102  | 1.61102  |
| Zfp207    | Zfp207-006    | 0.00640716  | 6.86559  | 6.86559  |
| Zfp212    | Zfp212-001    | 0.00518506  | 1.20233  | 1.20233  |
| Zfp217    | Zfp217-201    | 0.00297811  | 0.680389 | -1.46975 |
| Zfp219    | Zfp219-201    | 0.00551511  | 0.568199 | -1.75995 |
| Zfp219    | Zfp219-202    | 0.0275898   | 1.44414  | 1.44414  |
| Zfp236    | Zfp236-002    | 0.00433039  | 0.565246 | -1.76914 |
| Zfp236    | Zfp236-001    | 0.0190088   | 1.39477  | 1.39477  |
| Zfp260    | Zfp260-001    | 0.00718065  | 0.655513 | -1.52552 |
| Zfp260    | Zfp260-002    | 0.000250143 | 1.30838  | 1.30838  |
| Zfp275    | Zfp275-001    | 0.00251599  | 0.6724   | -1.48721 |
| Zfp277    | Zfp277-201    | 0.00376234  | 0.724359 | -1.38053 |
| Zfp280c   | Zfp280c-002   | 0.0368127   | 1.30735  | 1.30735  |
| Zfp287    | Zfp287-001    | 0.000410943 | 1.88403  | 1.88403  |
| Zfp287    | Zfp287-005    | 0.0127754   | 4.03301  | 4.03301  |
| Zfp317    | Zfp317-201    | 0.00270973  | 1.2214   | 1.2214   |
| Zfp322a   | Zfp322a-004   | 0.0466647   | 1.92906  | 1.92906  |
| Zfp329    | Zfp329-001    | 0.0276923   | 1.31373  | 1.31373  |
| Zfp330    | Zfp330-201    | 0.00437544  | 1.39215  | 1.39215  |
| Zfp335    | Zfp335-001    | 0.0290203   | 1.16957  | 1.16957  |
| Zfp335os  | Zfp335os-001  | 0.0133562   | 2.78441  | 2.78441  |
| Zfp35     | Zfp35-001     | 0.0478018   | 1.54151  | 1.54151  |
| Zfp354c   | Zfp354c-001   | 0.00227271  | 0.753304 | -1.32749 |
| Zfp362    | Zfp362-201    | 0.00932778  | 0.601609 | -1.66221 |
| Zfp365    | Zfp365-001    | 0.00025925  | 1.4528   | 1.4528   |
| Zfp367    | Zfp367-001    | 0.0189304   | 0.843981 | -1.18486 |
| Zfp369    | Zfp369-001    | 0.00382517  | 1.32199  | 1.32199  |
| Zfp369    | Zfp369-003    | 0.0232286   | 2.9921   | 2.9921   |
| Zfp36l2   | Zfp36l2-001   | 0.0274071   | 0.740441 | -1.35055 |



|         |             |             |          |          |
|---------|-------------|-------------|----------|----------|
| Zfp385c | Zfp385c-001 | 0.0345851   | 2.10686  | 2.10686  |
| Zfp386  | Zfp386-003  | 0.00178754  | 2.46037  | 2.46037  |
| Zfp397  | Zfp397-201  | 0.0231365   | 1.38042  | 1.38042  |
| Zfp420  | Zfp420-003  | 0.000229554 | 2.92012  | 2.92012  |
| Zfp420  | Zfp420-002  | 0.00131241  | 2.99693  | 2.99693  |
| Zfp422  | Zfp422-004  | 0.0235203   | 12.3628  | 12.3628  |
| Zfp433  | Zfp433-001  | 0.0142291   | 1.31434  | 1.31434  |
| Zfp438  | Zfp438-201  | 0.00084325  | 1.56699  | 1.56699  |
| Zfp444  | Zfp444-002  | 0.000694771 | 1.50454  | 1.50454  |
| Zfp446  | Zfp446-005  | 0.040071    | 1.39619  | 1.39619  |
| Zfp451  | Zfp451-002  | 0.0138841   | 0.750185 | -1.333   |
| Zfp451  | Zfp451-001  | 0.00452617  | 1.33295  | 1.33295  |
| Zfp462  | Zfp462-001  | 0.00611559  | 0.811584 | -1.23216 |
| Zfp467  | Zfp467-001  | 0.00807676  | 0.630595 | -1.58581 |
| Zfp467  | Zfp467-009  | 0.0160351   | 6.88995  | 6.88995  |
| Zfp473  | Zfp473-006  | 0.0157844   | 8.45476  | 8.45476  |
| Zfp51   | Zfp51-201   | 0.0418482   | 1.3106   | 1.3106   |
| Zfp511  | Zfp511-201  | 0.023568    | 1.19277  | 1.19277  |
| Zfp512  | Zfp512-008  | 0.019135    | 2.78264  | 2.78264  |
| Zfp518b | Zfp518b-001 | 0.0307181   | 0.527547 | -1.89557 |
| Zfp526  | Zfp526-001  | 0.00510662  | 1.19216  | 1.19216  |
| Zfp532  | Zfp532-002  | 0.0156079   | 0.434161 | -2.30329 |
| Zfp532  | Zfp532-003  | 0.00620888  | 0.478564 | -2.08959 |
| Zfp560  | Zfp560-002  | 0.00797771  | 1.78854  | 1.78854  |
| Zfp579  | Zfp579-002  | 0.0123643   | 1.3001   | 1.3001   |
| Zfp579  | Zfp579-003  | 0.0316618   | 3.15861  | 3.15861  |
| Zfp580  | Zfp580-201  | 0.0119682   | 1.56513  | 1.56513  |
| Zfp597  | Zfp597-003  | 0.00832457  | 4.17004  | 4.17004  |
| Zfp598  | Zfp598-201  | 9.42774e-07 | 1.41798  | 1.41798  |
| Zfp606  | Zfp606-004  | 0.0176369   | 1.80067  | 1.80067  |
| Zfp607  | Zfp607-001  | 0.00677956  | 1.25418  | 1.25418  |
| Zfp62   | Zfp62-201   | 0.00477928  | 0.656874 | -1.52236 |
| Zfp62   | Zfp62-010   | 0.0422719   | 1.77576  | 1.77576  |
| Zfp626  | Zfp626-201  | 0.0142475   | 9.48277  | 9.48277  |
| Zfp637  | Zfp637-001  | 0.023702    | 0.549584 | -1.81956 |
| Zfp637  | Zfp637-002  | 0.0480388   | 1.85423  | 1.85423  |
| Zfp638  | Zfp638-007  | 0.0400566   | 6.86618  | 6.86618  |
| Zfp639  | Zfp639-007  | 0.0128155   | 1.38143  | 1.38143  |
| Zfp639  | Zfp639-201  | 0.0358356   | 1.39792  | 1.39792  |
| Zfp64   | Zfp64-001   | 0.012943    | 0.676147 | -1.47897 |
| Zfp64   | Zfp64-002   | 0.027214    | 1.31817  | 1.31817  |
| Zfp652  | Zfp652-003  | 0.0161398   | 0.197429 | -5.0651  |
| Zfp652  | Zfp652-201  | 0.000356369 | 2.35319  | 2.35319  |

|           |               |            |          |          |
|-----------|---------------|------------|----------|----------|
| Zfp667    | Zfp667-001    | 0.0398079  | 2.24501  | 2.24501  |
| Zfp667    | Zfp667-201    | 0.0352848  | 4.81705  | 4.81705  |
| Zfp672    | Zfp672-007    | 0.01311    | 1.86631  | 1.86631  |
| Zfp689    | Zfp689-002    | 0.0164326  | 2.00116  | 2.00116  |
| Zfp704    | Zfp704-001    | 0.0206177  | 0.821851 | -1.21677 |
| Zfp715    | Zfp715-001    | 0.00771641 | 1.66872  | 1.66872  |
| Zfp740    | Zfp740-003    | 0.033578   | 0.666061 | -1.50137 |
| Zfp740    | Zfp740-008    | 0.0321622  | 186.012  | 186.012  |
| Zfp746    | Zfp746-002    | 0.0466137  | 2.10832  | 2.10832  |
| Zfp748    | Zfp748-002    | 0.0127157  | 1.56915  | 1.56915  |
| Zfp787    | Zfp787-201    | 0.00327032 | 1.18484  | 1.18484  |
| Zfp819    | Zfp819-001    | 0.0478514  | 2.71911  | 2.71911  |
| Zfp819    | Zfp819-201    | 0.0478514  | 2.71911  | 2.71911  |
| Zfp825    | Zfp825-001    | 0.038612   | 1.23817  | 1.23817  |
| Zfp862-ps | Zfp862-ps-002 | 0.0147235  | 2.60531  | 2.60531  |
| Zfp865    | Zfp865-202    | 0.0163037  | 1.44472  | 1.44472  |
| Zfp874a   | Zfp874a-001   | 0.00243669 | 1.69529  | 1.69529  |
| Zfp874b   | Zfp874b-001   | 0.0287512  | 1.2448   | 1.2448   |
| Zfp91     | Zfp91-003     | 0.0114112  | 3.53233  | 3.53233  |
| Zfp930    | Zfp930-201    | 0.00184662 | 1.34315  | 1.34315  |
| Zfp932    | Zfp932-001    | 0.0336924  | 1.3884   | 1.3884   |
| Zfp932    | Zfp932-005    | 0.0409856  | 2.77065  | 2.77065  |
| Zfp935    | Zfp935-201    | 0.0358644  | 1.26655  | 1.26655  |
| Zfp938    | Zfp938-002    | 0.021586   | 2.07544  | 2.07544  |
| Zfp94     | Zfp94-003     | 0.00388146 | 2.70278  | 2.70278  |
| Zfp941    | Zfp941-001    | 0.0286566  | 2.27906  | 2.27906  |
| Zfp942    | Zfp942-001    | 0.0171808  | 1.37283  | 1.37283  |
| Zfp942    | Zfp942-002    | 0.0252329  | 1.58646  | 1.58646  |
| Zfp943    | Zfp943-001    | 0.0114779  | 1.50661  | 1.50661  |
| Zfp944    | Zfp944-201    | 0.0121393  | 1.36005  | 1.36005  |
| Zfp945    | Zfp945-001    | 0.0365273  | 0.477264 | -2.09528 |
| Zfp945    | Zfp945-201    | 0.0250618  | 0.717648 | -1.39344 |
| Zfp945    | Zfp945-003    | 0.0161808  | 0.730443 | -1.36903 |
| Zfp946    | Zfp946-002    | 0.0493377  | 0.598596 | -1.67058 |
| Zfp946    | Zfp946-001    | 0.0498276  | 1.14675  | 1.14675  |
| Zfp948    | Zfp948-201    | 0.0173598  | 0.86387  | -1.15758 |
| Zfp950    | Zfp950-002    | 0.0392116  | 1.45423  | 1.45423  |
| Zfp955a   | Zfp955a-201   | 0.0494534  | 1.27324  | 1.27324  |
| Zfp956    | Zfp956-001    | 0.0247071  | 1.51546  | 1.51546  |
| Zfp961    | Zfp961-201    | 0.00509536 | 9.84821  | 9.84821  |
| Zfp964    | Zfp964-002    | 0.0376999  | 1.78477  | 1.78477  |
| Zfpl1     | Zfpl1-010     | 0.034292   | 0.450191 | -2.22128 |
| Zfpl1     | Zfpl1-007     | 0.00191993 | 13.0827  | 13.0827  |

|         |             |             |             |              |
|---------|-------------|-------------|-------------|--------------|
| Zfr     | Zfr-001     | 0.000256981 | 1.30588     | 1.30588      |
| Zfr2    | Zfr2-006    | 0.0389866   | 1.44344     | 1.44344      |
| Zfr2    | Zfr2-002    | 0.0470807   | 1.61212     | 1.61212      |
| Zfx     | Zfx-201     | 0.0069356   | 1.76339     | 1.76339      |
| Zfyve1  | Zfyve1-201  | 0.00232817  | 0.791212    | -1.26388     |
| Zfyve16 | Zfyve16-001 | 0.0485069   | 1.09499     | 1.09499      |
| Zfyve19 | Zfyve19-001 | 0.0470122   | 1.39855     | 1.39855      |
| Zfyve26 | Zfyve26-201 | 0.0209263   | 1.09122     | 1.09122      |
| Zfyve27 | Zfyve27-002 | 0.000368442 | 0.366469    | -2.72874     |
| Zfyve28 | Zfyve28-005 | 0.00302494  | 12.3324     | 12.3324      |
| Zhx3    | Zhx3-201    | 0.000227307 | 1.8744      | 1.8744       |
| Zkscan1 | Zkscan1-201 | 0.00753815  | 0.405894    | -2.4637      |
| Zkscan2 | Zkscan2-002 | 0.00238813  | 1.91854     | 1.91854      |
| Zkscan8 | Zkscan8-001 | 0.00414152  | 1.40423     | 1.40423      |
| Zmynd11 | Zmynd11-014 | 0.0363588   | 2.06614e-08 | -4.83993e+07 |
| Zmynd8  | Zmynd8-013  | 0.0231305   | 1.30286     | 1.30286      |
| Zmynd8  | Zmynd8-010  | 0.00239993  | 1.34652     | 1.34652      |
| Znhit1  | Znhit1-002  | 0.0396575   | 1.31468     | 1.31468      |
| Znrd1   | Znrd1-002   | 0.00517748  | 1.95131     | 1.95131      |
| Znrd1as | Znrd1as-001 | 0.00955109  | 1.49563     | 1.49563      |
| Znrf1   | Znrf1-203   | 0.0134578   | 0.28556     | -3.50189     |
| Znrf1   | Znrf1-003   | 0.00241372  | 0.686733    | -1.45617     |
| Znrf1   | Znrf1-002   | 0.00040824  | 0.703291    | -1.42189     |
| Znrf2   | Znrf2-002   | 0.00130067  | 15.6736     | 15.6736      |
| Zranb1  | Zranb1-001  | 0.00108654  | 0.678725    | -1.47335     |
| Zranb2  | Zranb2-004  | 0.0154469   | 1.31754     | 1.31754      |
| Zranb2  | Zranb2-001  | 0.0371552   | 1.52491     | 1.52491      |
| Zranb2  | Zranb2-006  | 0.0280898   | 2.71372     | 2.71372      |
| Zranb3  | Zranb3-001  | 0.03999     | 0.899396    | -1.11186     |
| Zranb3  | Zranb3-002  | 0.0132354   | 3.41471     | 3.41471      |
| Zrsr2   | Zrsr2-004   | 0.0146624   | 1.27464     | 1.27464      |
| Zscan10 | Zscan10-008 | 0.0353337   | 647844      | 647844       |
| Zscan20 | Zscan20-006 | 0.0327055   | 0.438417    | -2.28093     |
| Zscan20 | Zscan20-001 | 0.0042806   | 1.33393     | 1.33393      |
| Zscan26 | Zscan26-001 | 0.00385384  | 1.53108     | 1.53108      |
| Zswim1  | Zswim1-001  | 0.010891    | 1.34116     | 1.34116      |
| Zwilch  | Zwilch-005  | 0.00905122  | 0.323038    | -3.09561     |
| Zwilch  | Zwilch-004  | 0.0208299   | 0.65683     | -1.52246     |
| Zwint   | Zwint-003   | 0.0428366   | 0.748329    | -1.33631     |
| Zyg11a  | Zyg11a-001  | 0.00751581  | 3.21361     | 3.21361      |
| Zyg11a  | Zyg11a-201  | 0.00751587  | 3.21361     | 3.21361      |
| Zyx     | Zyx-001     | 0.0461108   | 0.725084    | -1.37915     |
| Zzz3    | Zzz3-001    | 0.00796284  | 0.686733    | -1.45617     |

## Supplementary Table S3

### miR-132/212 network in 3xTg-AD mice

adamts5  
adgrl3  
aebp2  
anp32a  
atp10d  
atp6v0a2  
bmpr1a  
bnip2  
brwd1  
calu  
caprin1  
cbx1  
cdkn1a  
celsr3  
ctdspi  
desi2  
eif4a2  
epb41  
esrrg  
fam76b  
fkbp2  
foxn3  
foxo3  
frk  
gapvd1  
gna12  
hbegf  
hey1  
hira  
hnrnph1  
isl1  
kcnma1  
kdm5a  
kdm5b  
kdm7a  
klhdc10  
mapk1  
mapt  
mef2c  
meis2  
mfap1  
mtf1  
nab1  
ndrg4  
nfya

### miR-132/212 network in Neuro2a cells

abr  
acsl4  
aebp2  
anp32a  
ap1g1  
arhgap21  
arhgap32  
arhgef40  
arid2  
arid4b  
atp10d  
azin1  
b4galt6  
bcl2l11  
bmpr1a  
bri3  
brwd1  
btbd7  
btg2  
c6orf106  
calu  
camsap2  
cc2d1b  
ccdc71l  
cd164  
cdk19  
celsr3  
cers2  
cnih1  
cpsf6  
crk  
csde1  
csrnp3  
ctdspi2  
ctgf  
dag1  
dazap2  
dnajb14  
dnmt3a  
dock4  
dpysl3  
dusp9  
extl2  
fam76b  
fbxo28

### Common targets

aebp2  
anp32a  
atp10d  
bmpr1a  
brwd1  
calu  
celsr3  
fam76b  
fkbp2  
foxn3  
gna12  
hbegf  
hnrnph1  
kdm5a  
klhdc10  
mapk1  
mapt  
meis2  
nfya  
pcgf3  
pik3r1  
sephs1  
sgk3  
sirt1  
smad5  
spred1  
srgap2  
srsf10  
tmeff1  
trib2  
zeb2  
zfyve1

pcgf3  
pik3r1  
pou4f1  
pprc1  
ptch1  
rab15  
sept8  
sephs1  
setd5  
sgk3  
sirt1  
slc2a1  
slc6a1  
smad5  
sox11  
spred1  
srgap2  
srsf1  
srsf10  
taf4  
tceb1  
tcf7l2  
tex30  
tmeff1  
tmem64  
trib2  
zeb2  
zfyve1  
znf516

fbxw11  
fgf7  
fkbp2  
fmr1  
foxn3  
fubp1  
fxr1  
gmfb  
gna12  
gnb1  
gpd2  
hbegf  
hn1  
hnrnph1  
hnrnrm  
homer1  
kcmf1  
kdm5a  
klhdc10  
kmt5b  
kras  
ksr2  
large  
lsm11  
lzts3  
map3k3  
mapk1  
mapt  
mecp2  
meis2  
mepce  
mex3a  
mex3c  
mia3  
mycbp2  
nfib  
nfyf  
nmnat2  
nmt2  
nova1  
nrep  
nrn1  
olfm1  
osbpl8  
papola  
pcgf3  
pea15  
pfn2

pik3ip1  
pik3r1  
ppfibp1  
ppp3ca  
prickle2  
ptbp2  
ptpn4  
purb  
rapgef6  
rbm12  
sema6d  
sephs1  
sgk3  
shoc2  
sirt1  
six4  
slc12a6  
slc24a3  
slc44a1  
smad5  
snx18  
sos1  
sox4  
spp13  
spred1  
sptssa  
srgap2  
srgap3  
srsf10  
ssh2  
sucla2  
tcf4  
tead1  
tgfb1  
tjap1  
tln2  
tmeff1  
tmem2  
tmem43  
tmem50b  
trib2  
trim2  
ube2e2  
vdac2  
whsc111  
zeb2  
zfyve1  
znf148

znf236  
znf362







## Supplementary Table S5

| insoluble A $\beta$ 42 - miR-132 |          |         | insoluble A $\beta$ 42 - miR-212 |          |         |
|----------------------------------|----------|---------|----------------------------------|----------|---------|
|                                  | R square | P value |                                  | R square | P value |
| <b>Ctrl</b>                      | 0.141    | 0.229   | <b>Ctrl</b>                      | 0.1701   | 0.1827  |
| <b>MCI</b>                       | 0.02766  | 0.625   | <b>MCI</b>                       | 0.09083  | 0.3411  |
| <b>AD</b>                        | 0.1729   | 0.1789  | <b>AD</b>                        | 0.2846   | 0.091   |
| <b>All</b>                       | 0.1328   | 0.0314  | <b>All</b>                       | 0.1907   | 0.0087  |

  

| amyloid plaques - miR-132 |          |         | amyloid plaques-miR-212 |          |         |
|---------------------------|----------|---------|-------------------------|----------|---------|
|                           | R square | P value |                         | R square | P value |
| <b>Ctrl</b>               | 0.03043  | 0.5876  | <b>Ctrl</b>             | 0.04521  | 0.507   |
| <b>MCI</b>                | 0.01056  | 0.7637  | <b>MCI</b>              | 0.04117  | 0.5271  |
| <b>AD</b>                 | 0.2269   | 0.1175  | <b>AD</b>               | 0.1988   | 0.1463  |
| <b>All</b>                | 0.1282   | 0.0347  | <b>All</b>              | 0.1458   | 0.0216  |

  

| Sirt1-miR-132 |          |         | Sirt1-miR-212 |          |         |
|---------------|----------|---------|---------------|----------|---------|
|               | R square | P value |               | R square | P value |
| <b>Ctrl</b>   | 0.000715 | 0.9456  | <b>Ctrl</b>   | 0.03451  | 0.5632  |
| <b>MCI</b>    | 0.2251   | 0.1969  | <b>MCI</b>    | 0.03584  | 0.5557  |
| <b>AD</b>     | 0.2118   | 0.1808  | <b>AD</b>     | 0.01994  | 0.6788  |
| <b>All</b>    | 0.1526   | 0.0398  | <b>All</b>    | 0.000483 | 0.9003  |

  

| insoluble A $\beta$ 42 - Sirt1 |          |         |
|--------------------------------|----------|---------|
|                                | R square | P value |
| <b>Ctrl</b>                    | 0.002502 | 0.8983  |
| <b>MCI</b>                     | 0.1655   | 0.1893  |
| <b>AD</b>                      | 0.2331   | 0.1576  |
| <b>All</b>                     | 0.1099   | 0.0685  |
